# Supplementary material for: Rapid Mutation of Endogenous Zebrafish Genes Using Zinc Finger Nucleases Made by Oligomerized Pool ENgineering (OPEN)
Source: PLoS One. 2009 Feb 9;4(2):e4348. doi: 10.1371/journal.pone.0004348 (PMC2634973; doi:10.1371/journal.pone.0004348)
Supplement: Table S1 — Potential OPEN ZFN target sites in gene transcripts encoded on zebrafish chromosome 1. Potential OPEN ZFN target sites within transcripts were identified as described in Materials and Methods. Gene ID and Transcript ID are from the Ensembl Danio rerio release 51 database. “Strand” indicates whether the “Target Site” shown (written 5′ to 3′) occurs on the forward (+) or reverse (−) strand. “ZFN Spacer Length” indicates the length of the spacer sequence located between the ZFN half-sites (5, 6, or 7 bps). “Coding Sequence Length” indicates the total nucleotide length of the coding sequence within the transcript and “ZFN Cleavage Site” indicates the nucleotide position of the cleavage site (i.e.–the first base of the “Target Site”) within the coding sequence. (2.22 MB XLS) [file pone.0004348.s001.xls]

## Sheet: Chromosome1
Gene ID	Transcript ID	Chromosome Number	Exon Number	Coding Exon Number	TargetSite	ZFN Spacer Length	Strand	ZFN Cleavage Site	Coding Sequence Length
ENSDARG00000000086	ENSDART00000000087	1	1	1	CTCACCTCCGAAGGGTGTGGGAA	5	-	20	5166
ENSDARG00000000086	ENSDART00000000087	1	1	1	CTCACCTCCGAAGGGTGTGGGAAAC	7	-	18	5166
ENSDARG00000000086	ENSDART00000000087	1	1	1	CAACTCACCTCCGAAGGGTGTGGGA	7	-	21	5166
ENSDARG00000000086	ENSDART00000000087	1	2	2	GAAGCCAGCGGGTGTTGGGGTGAG	6	-	103	5166
ENSDARG00000000086	ENSDART00000000087	1	4	4	TTAATCAGCTTCATTGCGATGGA	5	-	247	5166
ENSDARG00000000086	ENSDART00000000087	1	7	7	CACGGCCCAGTCAGCGGGTGGAGGA	7	-	567	5166
ENSDARG00000000086	ENSDART00000000087	1	7	7	GGCCCAGTCAGCGGGTGGAGGAG	5	-	566	5166
ENSDARG00000000086	ENSDART00000000087	1	7	7	GGCCCAGTCAGCGGGTGGAGGAGCA	7	-	564	5166
ENSDARG00000000086	ENSDART00000000087	1	7	7	AGACACGGCCCAGTCAGCGGGTGGA	7	-	570	5166
ENSDARG00000000086	ENSDART00000000087	1	8	8	TGCATCAGAATAGTTCTGGCTTG	5	-	670	5166
ENSDARG00000000086	ENSDART00000000087	1	9	9	GGCGGCAGCAAAGGGGGAAGAGGGA	7	-	818	5166
ENSDARG00000000086	ENSDART00000000087	1	9	9	GGCAGCAAAGGGGGAAGAGGGAGAC	7	-	815	5166
ENSDARG00000000086	ENSDART00000000087	1	11	11	TCCAGCTCCTGCTGTCTGCGTCT	5	-	1141	5166
ENSDARG00000000086	ENSDART00000000087	1	11	11	TCCAGCTCCTGCTGTCTGCGTCTCT	7	-	1139	5166
ENSDARG00000000086	ENSDART00000000087	1	11	11	CGCTCCTGCTCTTTCCTCTGCTGCT	7	-	1055	5166
ENSDARG00000000086	ENSDART00000000087	1	11	11	TGCTCCAGAAGTGCCTGTCGACGTT	7	-	1034	5166
ENSDARG00000000086	ENSDART00000000087	1	12	12	CGCTCCAGCTCCCGTTTAGCAGCC	6	-	1239	5166
ENSDARG00000000086	ENSDART00000000087	1	12	12	TCCCACTCCAGCTGCCTCTGTCGCT	7	-	1259	5166
ENSDARG00000000086	ENSDART00000000087	1	12	12	TCCAGCTCCCGTTTAGCAGCCTTC	6	-	1236	5166
ENSDARG00000000086	ENSDART00000000087	1	12	12	GTCCTCTCCCACTCCAGCTGCCTCT	7	-	1265	5166
ENSDARG00000000086	ENSDART00000000087	1	13	13	CACACCTGCAGCTGCTGTTGCAGGC	7	-	1511	5166
ENSDARG00000000086	ENSDART00000000087	1	13	13	ACCTGCAGCTGCTGTTGCAGGCTTG	7	-	1508	5166
ENSDARG00000000086	ENSDART00000000087	1	15	15	TTCAGCTGCTGTTTGGTGGATTC	5	-	1660	5166
ENSDARG00000000086	ENSDART00000000087	1	15	15	TTCAGCTGCTGTTTGGTGGATTCT	6	-	1659	5166
ENSDARG00000000086	ENSDART00000000087	1	15	15	ACCTTCAGCTGTGTGTTGAAGGC	5	-	1738	5166
ENSDARG00000000086	ENSDART00000000087	1	16	16	TCCAGCTCCTTCTGTTTCTGCCTCT	7	-	1787	5166
ENSDARG00000000086	ENSDART00000000087	1	16	16	TTCTGCCTCTGCTGTTTGTTGTG	5	-	1774	5166
ENSDARG00000000086	ENSDART00000000087	1	16	16	TGCCTCTGCTGTTTGTTGTGGATTT	7	-	1769	5166
ENSDARG00000000086	ENSDART00000000087	1	16	16	TGCCTCTGCTGTTTGTTGTGGAT	5	-	1771	5166
ENSDARG00000000086	ENSDART00000000087	1	17	17	CCCATCATCCCTCCACGCTGGAGAC	7	-	1893	5166
ENSDARG00000000086	ENSDART00000000087	1	19	19	GAAATCTGCCCAATTGCTTGATGC	6	-	2491	5166
ENSDARG00000000086	ENSDART00000000087	1	19	19	TTCTCCGCATAGTTGGCAGGAAAC	6	-	2268	5166
ENSDARG00000000086	ENSDART00000000087	1	19	19	ATCTGCCCAATTGCTTGATGCTGAG	7	-	2487	5166
ENSDARG00000000086	ENSDART00000000087	1	19	19	AGAAGCAGATGACATGTGAGAAC	5	-	2360	5166
ENSDARG00000000086	ENSDART00000000087	1	20	20	GTCCAAGCACGGGTGAGGGGGAG	5	-	2670	5166
ENSDARG00000000086	ENSDART00000000087	1	20	20	GTCCAAGCACGGGTGAGGGGGAGGA	7	-	2668	5166
ENSDARG00000000086	ENSDART00000000087	1	20	20	TTCTCCACAGCAGAATTAGAGGGC	6	-	2526	5166
ENSDARG00000000086	ENSDART00000000087	1	22	22	ACCTTCTCCGAGCTCTGTGGGTTTG	7	-	2961	5166
ENSDARG00000000086	ENSDART00000000087	1	22	22	ACCTTCTCCGAGCTCTGTGGGTTT	6	-	2962	5166
ENSDARG00000000086	ENSDART00000000087	1	23	23	ATCTCCTTCTTTCTTGGTGACTGT	6	-	3094	5166
ENSDARG00000000086	ENSDART00000000087	1	25	25	CCCACCATCCTCCCGGGTTTTTC	5	-	3321	5166
ENSDARG00000000086	ENSDART00000000087	1	25	25	TTCCCACCATCCTCCCGGGTTTTTC	7	-	3321	5166
ENSDARG00000000086	ENSDART00000000087	1	25	25	CCCACCATCCTCCCGGGTTTTTCT	6	-	3320	5166
ENSDARG00000000086	ENSDART00000000087	1	26	26	GTCGGCAGCTTGGGTGGGTTGGG	5	-	3448	5166
ENSDARG00000000086	ENSDART00000000087	1	26	26	GAAACCAGCCAATCTGCCGCTTCT	6	-	3368	5166
ENSDARG00000000086	ENSDART00000000087	1	26	26	AAACCAGCCAATCTGCCGCTTCT	5	-	3368	5166
ENSDARG00000000086	ENSDART00000000087	1	27	27	TGCTCAACACATTGATGATTTGGCC	7	-	3547	5166
ENSDARG00000000086	ENSDART00000000087	1	27	27	CTCAACACATTGATGATTTGGCC	5	-	3547	5166
ENSDARG00000000086	ENSDART00000000087	1	27	27	CTCGTCATCATTCTGAGCAGTGTAA	7	-	3507	5166
ENSDARG00000000086	ENSDART00000000087	1	29	29	AAATCAGACTCCAGCAGAGGCTTCT	7	-	3803	5166
ENSDARG00000000086	ENSDART00000000087	1	29	29	CAAATCAGACTCCAGCAGAGGCT	5	-	3806	5166
ENSDARG00000000086	ENSDART00000000087	1	30	30	GTTTTCTGCTGAATGAGGGTGGC	5	-	4030	5166
ENSDARG00000000086	ENSDART00000000087	1	30	30	CACCTCGTCAGTTTTCTGCTGAA	5	-	4040	5166
ENSDARG00000000086	ENSDART00000000087	1	32	32	TCCCTCACACTGCACATGTGCCTGT	7	-	4320	5166
ENSDARG00000000086	ENSDART00000000087	1	32	32	TTCTCCAGAGCCAGACGCAGGTGAC	7	-	4223	5166
ENSDARG00000000086	ENSDART00000000087	1	32	32	CCCTCACACTGCACATGTGCCTGT	6	-	4320	5166
ENSDARG00000000086	ENSDART00000000087	1	38	38	AAAAGCAGACGCTTGGTGATGGG	5	-	5092	5166
ENSDARG00000000606	ENSDART00000054388	1	1	1	ACCAACATCTCAACTTGTGCTGGT	6	-	186	11295
ENSDARG00000000606	ENSDART00000054388	1	1	1	GCATTCGGCTGTGGGTGTCTGGGCA	7	-	101	11295
ENSDARG00000000606	ENSDART00000054388	1	1	1	AGCATCAGCATTCGGCTGTGGGTGT	7	-	108	11295
ENSDARG00000000606	ENSDART00000054388	1	1	1	AGCATCAGCATTCGGCTGTGGGT	5	-	110	11295
ENSDARG00000000606	ENSDART00000054388	1	5	5	TCCTCCAGCTGTGTGTATTGTGC	5	-	1030	11295
ENSDARG00000000606	ENSDART00000054388	1	5	5	CACCTCCTCCAGCTGTGTGTATTG	6	-	1033	11295
ENSDARG00000000606	ENSDART00000054388	1	5	5	ACCTCCTCCAGCTGTGTGTATTG	5	-	1033	11295
ENSDARG00000000606	ENSDART00000054388	1	6	6	CACTTCGCCATAATCAGGTGTGTGT	7	-	1137	11295
ENSDARG00000000606	ENSDART00000054388	1	8	8	GTTGACCACAAGCATGTGGGTTGT	6	-	1318	11295
ENSDARG00000000606	ENSDART00000054388	1	8	8	GTTGACCACAAGCATGTGGGTTG	5	-	1319	11295
ENSDARG00000000606	ENSDART00000054388	1	8	8	GTTGACCACAAGCATGTGGGTTGTG	7	-	1317	11295
ENSDARG00000000606	ENSDART00000054388	1	8	8	TTACCCGTCCAGCTCTGAATGAGGG	7	-	1400	11295
ENSDARG00000000606	ENSDART00000054388	1	11	11	AAAACCTTAATGTTAAGAATGATGT	7	-	1706	11295
ENSDARG00000000606	ENSDART00000054388	1	13	13	CAATGCAGCGCAGAGGAGATGGT	5	-	1974	11295
ENSDARG00000000606	ENSDART00000054388	1	15	15	TCCCACTGCCTTGTCGATGGTGTT	6	-	2284	11295
ENSDARG00000000606	ENSDART00000054388	1	15	15	CTCTCCCACTGCCTTGTCGATGGT	6	-	2287	11295
ENSDARG00000000606	ENSDART00000054388	1	16	16	CCCAGCAACCGTCGTATGTGAGAAC	7	-	2435	11295
ENSDARG00000000606	ENSDART00000054388	1	17	17	GGCACCACATTGTTTGGTGGCAGTC	7	-	2615	11295
ENSDARG00000000606	ENSDART00000054388	1	19	19	AGCCTCAGCAGGCAGCTGCCTCT	5	-	2900	11295
ENSDARG00000000606	ENSDART00000054388	1	21	21	ATCCCCTTCAGGTGTCGTAGGTGTA	7	-	3234	11295
ENSDARG00000000606	ENSDART00000054388	1	21	21	GTCATCCCCTTCAGGTGTCGTAGGT	7	-	3237	11295
ENSDARG00000000606	ENSDART00000054388	1	21	21	AAACACTTCCTGAGATGAGGCTGCA	7	-	3176	11295
ENSDARG00000000606	ENSDART00000054388	1	22	22	AACCCACTCAACTCTGGGTTTGC	5	-	3446	11295
ENSDARG00000000606	ENSDART00000054388	1	22	22	ACAACCCACTCAACTCTGGGTTT	5	-	3448	11295
ENSDARG00000000606	ENSDART00000054388	1	22	22	AACCCACTCAACTCTGGGTTTGCT	6	-	3445	11295
ENSDARG00000000606	ENSDART00000054388	1	22	22	CACAACCCACTCAACTCTGGGTTT	6	-	3448	11295
ENSDARG00000000606	ENSDART00000054388	1	22	22	ACAACCCACTCAACTCTGGGTTTGC	7	-	3446	11295
ENSDARG00000000606	ENSDART00000054388	1	24	24	GCATGCACATCTATGGTGATGAG	5	-	3670	11295
ENSDARG00000000606	ENSDART00000054388	1	27	27	TTACACACCTCAGCGATGAGTGC	5	-	4180	11295
ENSDARG00000000606	ENSDART00000054388	1	27	27	CACCTCAGCGATGAGTGCATAGTTG	7	-	4173	11295
ENSDARG00000000606	ENSDART00000054388	1	29	29	TCCTCACTCAGGTTCGGATTTTCT	6	-	4356	11295
ENSDARG00000000606	ENSDART00000054388	1	30	30	CACCCATGCTCACAGACTTTGGG	5	-	4749	11295
ENSDARG00000000606	ENSDART00000054388	1	31	31	CACAACGACTTACTGTTGCAGGA	5	-	5031	11295
ENSDARG00000000606	ENSDART00000054388	1	31	31	AACGACTTACTGTTGCAGGAGAC	5	-	5028	11295
ENSDARG00000000606	ENSDART00000054388	1	32	32	ACAGCCTGCACACAGTGCTTTGAT	6	-	5202	11295
ENSDARG00000000606	ENSDART00000054388	1	32	32	AAAGGCAGCAGAGGGTTGTGACTTT	7	-	5245	11295
ENSDARG00000000606	ENSDART00000054388	1	32	32	GCCTGCACACAGTGCTTTGATGCA	6	-	5199	11295
ENSDARG00000000606	ENSDART00000054388	1	33	33	CCCAACTGCCCAGAGGTAGCAGAA	6	-	5356	11295
ENSDARG00000000606	ENSDART00000054388	1	33	33	TCCCCCAACTGCCCAGAGGTAGCA	6	-	5359	11295
ENSDARG00000000606	ENSDART00000054388	1	33	33	AACTGCTGCCTGACGAAGGTGTC	5	-	5413	11295
ENSDARG00000000606	ENSDART00000054388	1	36	36	CTAAGCAGCTCTATAGGGGGCTGAG	7	-	5900	11295
ENSDARG00000000606	ENSDART00000054388	1	37	37	TTAAAAATCTGTTTGAGGCTGCT	5	-	6094	11295
ENSDARG00000000606	ENSDART00000054388	1	37	37	TACGACCTCCACCAGGAGGAGCA	5	-	6009	11295
ENSDARG00000000606	ENSDART00000054388	1	38	38	GCAGCCTGCTTGACCGCCGTGGAA	6	-	6147	11295
ENSDARG00000000606	ENSDART00000054388	1	40	40	CTCCAAAAATGATGGGCTGATTC	5	-	6477	11295
ENSDARG00000000606	ENSDART00000054388	1	40	40	ATCTCCAAAAATGATGGGCTGATTC	7	-	6477	11295
ENSDARG00000000606	ENSDART00000054388	1	40	40	ATCTCCAAAAATGATGGGCTGAT	5	-	6479	11295
ENSDARG00000000606	ENSDART00000054388	1	42	42	GAATCATGCGGGCAATTCTGTGGAC	7	-	6658	11295
ENSDARG00000000606	ENSDART00000054388	1	44	44	ACATGCGGCATCGTGAGCGGAAGGA	7	-	7123	11295
ENSDARG00000000606	ENSDART00000054388	1	44	44	TACAAACCAGTCGATGGTGCAGCA	6	-	7165	11295
ENSDARG00000000606	ENSDART00000054388	1	44	44	GTACAAACCAGTCGATGGTGCAGCA	7	-	7165	11295
ENSDARG00000000606	ENSDART00000054388	1	44	44	AAACCAGTCGATGGTGCAGCAGTT	6	-	7162	11295
ENSDARG00000000606	ENSDART00000054388	1	44	44	TGCGGCATCGTGAGCGGAAGGAGTC	7	-	7120	11295
ENSDARG00000000606	ENSDART00000054388	1	44	44	ACACAACACTATGTGCAGCTTCT	5	-	7082	11295
ENSDARG00000000606	ENSDART00000054388	1	45	45	CTCACCGCCTGCAGCTGTTGTCTCT	7	-	7415	11295
ENSDARG00000000606	ENSDART00000054388	1	45	45	AGCTCCAAATAGGAGGTCGGTGTG	6	-	7359	11295
ENSDARG00000000606	ENSDART00000054388	1	45	45	AAACTCCACATTCTGGAAGAAGGT	6	-	7225	11295
ENSDARG00000000606	ENSDART00000054388	1	45	45	ATCCTCACCGCCTGCAGCTGTTGTC	7	-	7418	11295
ENSDARG00000000606	ENSDART00000054388	1	45	45	AACTCCACATTCTGGAAGAAGGT	5	-	7225	11295
ENSDARG00000000606	ENSDART00000054388	1	46	46	GTACACACCTGATCCGCGTTTTCT	6	-	7587	11295
ENSDARG00000000606	ENSDART00000054388	1	46	46	GGCTCCAGAGCCGAGAGGTCTTG	5	-	7504	11295
ENSDARG00000000606	ENSDART00000054388	1	47	47	TGCATCATCTGCAATGGCTTGAGTC	7	-	7656	11295
ENSDARG00000000606	ENSDART00000054388	1	47	47	ACAGTCATCACGAGGTCTGGTGGT	6	-	7782	11295
ENSDARG00000000606	ENSDART00000054388	1	48	48	GTTGCCATCTCCCAGGAGCTGCT	5	-	7859	11295
ENSDARG00000000606	ENSDART00000054388	1	48	48	GCAGCCAGCTTTTCTCGTTTAGGTC	7	-	8069	11295
ENSDARG00000000606	ENSDART00000054388	1	48	48	GCCATCTCCCAGGAGCTGCTTTG	5	-	7856	11295
ENSDARG00000000606	ENSDART00000054388	1	48	48	GCCATCTCCCAGGAGCTGCTTTGCA	7	-	7854	11295
ENSDARG00000000606	ENSDART00000054388	1	49	49	TCCTGCAAAACTTTGATTTGATTCT	7	-	8162	11295
ENSDARG00000000606	ENSDART00000054388	1	50	50	CTCATCACCCAGAGCAGATGTTAAC	7	-	8271	11295
ENSDARG00000000606	ENSDART00000054388	1	50	50	GTCAAAGCCATGGTTTTGGCTAC	5	-	8221	11295
ENSDARG00000000606	ENSDART00000054388	1	53	53	ACAAACCTCAGGAAGGTAGTGGGG	6	-	8902	11295
ENSDARG00000000606	ENSDART00000054388	1	53	53	AACGTCTGCTTCAGAAGAATGGGCT	7	-	8783	11295
ENSDARG00000000606	ENSDART00000054388	1	57	57	TCCAGCCCCTCTCAGGAAGTATAG	6	-	9547	11295
ENSDARG00000000606	ENSDART00000054388	1	57	57	CTCCACGCACAGCATGAAGCTGTA	6	-	9484	11295
ENSDARG00000000606	ENSDART00000054388	1	67	67	TCCCTCCACCTGCTGCTGAAGAA	5	-	10911	11295
ENSDARG00000000606	ENSDART00000054388	1	69	69	CCCAGCTGCCAAGAGGTTTGAGAG	6	-	11246	11295
ENSDARG00000000606	ENSDART00000088143	1	1	1	GCATTCGGCTGTGGGTGTCTGGGCA	7	-	101	11295
ENSDARG00000000606	ENSDART00000088143	1	1	1	ACCAACATCTCAACTTGTGCTGGT	6	-	186	11295
ENSDARG00000000606	ENSDART00000088143	1	1	1	AGCATCAGCATTCGGCTGTGGGT	5	-	110	11295
ENSDARG00000000606	ENSDART00000088143	1	1	1	AGCATCAGCATTCGGCTGTGGGTGT	7	-	108	11295
ENSDARG00000000606	ENSDART00000088143	1	5	5	ACCTCCTCCAGCTGTGTGTATTG	5	-	1033	11295
ENSDARG00000000606	ENSDART00000088143	1	5	5	TCCTCCAGCTGTGTGTATTGTGC	5	-	1030	11295
ENSDARG00000000606	ENSDART00000088143	1	5	5	CACCTCCTCCAGCTGTGTGTATTG	6	-	1033	11295
ENSDARG00000000606	ENSDART00000088143	1	6	6	CACTTCGCCATAATCAGGTGTGTGT	7	-	1137	11295
ENSDARG00000000606	ENSDART00000088143	1	8	8	GTTGACCACAAGCATGTGGGTTGTG	7	-	1320	11295
ENSDARG00000000606	ENSDART00000088143	1	8	8	GTTGACCACAAGCATGTGGGTTGT	6	-	1321	11295
ENSDARG00000000606	ENSDART00000088143	1	8	8	GTTGACCACAAGCATGTGGGTTG	5	-	1322	11295
ENSDARG00000000606	ENSDART00000088143	1	8	8	TTACCCGTCCAGCTCTGAATGAGGG	7	-	1403	11295
ENSDARG00000000606	ENSDART00000088143	1	11	11	AAAACCTTAATGTTAAGAATGATGT	7	-	1709	11295
ENSDARG00000000606	ENSDART00000088143	1	13	13	CAATGCAGCGCAGAGGAGATGGT	5	-	1977	11295
ENSDARG00000000606	ENSDART00000088143	1	15	15	CTCTCCCACTGCCTTGTCGATGGT	6	-	2290	11295
ENSDARG00000000606	ENSDART00000088143	1	15	15	TCCCACTGCCTTGTCGATGGTGTT	6	-	2287	11295
ENSDARG00000000606	ENSDART00000088143	1	16	16	CCCAGCAACCGTCGTATGTGAGAAC	7	-	2438	11295
ENSDARG00000000606	ENSDART00000088143	1	17	17	GGCACCACATTGTTTGGTGGCAGTC	7	-	2618	11295
ENSDARG00000000606	ENSDART00000088143	1	19	19	AGCCTCAGCAGGCAGCTGCCTCT	5	-	2903	11295
ENSDARG00000000606	ENSDART00000088143	1	21	21	AAACACTTCCTGAGATGAGGCTGCA	7	-	3179	11295
ENSDARG00000000606	ENSDART00000088143	1	21	21	ATCCCCTTCAGGTGTCGTAGGTGTA	7	-	3237	11295
ENSDARG00000000606	ENSDART00000088143	1	21	21	GTCATCCCCTTCAGGTGTCGTAGGT	7	-	3240	11295
ENSDARG00000000606	ENSDART00000088143	1	22	22	CACAACCCACTCAACTCTGGGTTT	6	-	3451	11295
ENSDARG00000000606	ENSDART00000088143	1	22	22	ACAACCCACTCAACTCTGGGTTT	5	-	3451	11295
ENSDARG00000000606	ENSDART00000088143	1	22	22	ACAACCCACTCAACTCTGGGTTTGC	7	-	3449	11295
ENSDARG00000000606	ENSDART00000088143	1	22	22	AACCCACTCAACTCTGGGTTTGC	5	-	3449	11295
ENSDARG00000000606	ENSDART00000088143	1	22	22	AACCCACTCAACTCTGGGTTTGCT	6	-	3448	11295
ENSDARG00000000606	ENSDART00000088143	1	24	24	GCATGCACATCTATGGTGATGAG	5	-	3676	11295
ENSDARG00000000606	ENSDART00000088143	1	27	27	TTACACACCTCAGCGATGAGTGC	5	-	4186	11295
ENSDARG00000000606	ENSDART00000088143	1	27	27	CACCTCAGCGATGAGTGCATAGTTG	7	-	4179	11295
ENSDARG00000000606	ENSDART00000088143	1	29	29	TCCTCACTCAGGTTCGGATTTTCT	6	-	4362	11295
ENSDARG00000000606	ENSDART00000088143	1	30	30	CACCCATGCTCACAGACTTTGGG	5	-	4755	11295
ENSDARG00000000606	ENSDART00000088143	1	31	31	CACAACGACTTACTGTTGCAGGA	5	-	5037	11295
ENSDARG00000000606	ENSDART00000088143	1	31	31	AACGACTTACTGTTGCAGGAGAC	5	-	5034	11295
ENSDARG00000000606	ENSDART00000088143	1	32	32	AAAGGCAGCAGAGGGTTGTGACTTT	7	-	5251	11295
ENSDARG00000000606	ENSDART00000088143	1	32	32	GCCTGCACACAGTGCTTTGATGCA	6	-	5205	11295
ENSDARG00000000606	ENSDART00000088143	1	32	32	ACAGCCTGCACACAGTGCTTTGAT	6	-	5208	11295
ENSDARG00000000606	ENSDART00000088143	1	33	33	CCCAACTGCCCAGAGGTAGCAGAA	6	-	5362	11295
ENSDARG00000000606	ENSDART00000088143	1	33	33	TCCCCCAACTGCCCAGAGGTAGCA	6	-	5365	11295
ENSDARG00000000606	ENSDART00000088143	1	33	33	AACTGCTGCCTGACGAAGGTGTC	5	-	5419	11295
ENSDARG00000000606	ENSDART00000088143	1	36	36	CTAAGCAGCTCTATAGGGGGCTGAG	7	-	5906	11295
ENSDARG00000000606	ENSDART00000088143	1	38	38	TACGACCTCCACCAGGAGGAGCA	5	-	6018	11295
ENSDARG00000000606	ENSDART00000088143	1	38	38	TTAAAAATCTGTTTGAGGCTGCT	5	-	6103	11295
ENSDARG00000000606	ENSDART00000088143	1	39	39	GCAGCCTGCTTGACCGCCGTGGAA	6	-	6156	11295
ENSDARG00000000606	ENSDART00000088143	1	41	41	ATCTCCAAAAATGATGGGCTGAT	5	-	6488	11295
ENSDARG00000000606	ENSDART00000088143	1	41	41	ATCTCCAAAAATGATGGGCTGATTC	7	-	6486	11295
ENSDARG00000000606	ENSDART00000088143	1	41	41	CTCCAAAAATGATGGGCTGATTC	5	-	6486	11295
ENSDARG00000000606	ENSDART00000088143	1	43	43	GAATCATGCGGGCAATTCTGTGGAC	7	-	6667	11295
ENSDARG00000000606	ENSDART00000088143	1	45	45	AAACCAGTCGATGGTGCAGCAGTT	6	-	7171	11295
ENSDARG00000000606	ENSDART00000088143	1	45	45	TACAAACCAGTCGATGGTGCAGCA	6	-	7174	11295
ENSDARG00000000606	ENSDART00000088143	1	45	45	ACATGCGGCATCGTGAGCGGAAGGA	7	-	7132	11295
ENSDARG00000000606	ENSDART00000088143	1	45	45	ACACAACACTATGTGCAGCTTCT	5	-	7091	11295
ENSDARG00000000606	ENSDART00000088143	1	45	45	TGCGGCATCGTGAGCGGAAGGAGTC	7	-	7129	11295
ENSDARG00000000606	ENSDART00000088143	1	45	45	GTACAAACCAGTCGATGGTGCAGCA	7	-	7174	11295
ENSDARG00000000606	ENSDART00000088143	1	46	46	AACTCCACATTCTGGAAGAAGGT	5	-	7234	11295
ENSDARG00000000606	ENSDART00000088143	1	46	46	AGCTCCAAATAGGAGGTCGGTGTG	6	-	7368	11295
ENSDARG00000000606	ENSDART00000088143	1	46	46	ATCCTCACCGCCTGCAGCTGTTGTC	7	-	7427	11295
ENSDARG00000000606	ENSDART00000088143	1	46	46	CTCACCGCCTGCAGCTGTTGTCTCT	7	-	7424	11295
ENSDARG00000000606	ENSDART00000088143	1	46	46	AAACTCCACATTCTGGAAGAAGGT	6	-	7234	11295
ENSDARG00000000606	ENSDART00000088143	1	47	47	GGCTCCAGAGCCGAGAGGTCTTG	5	-	7513	11295
ENSDARG00000000606	ENSDART00000088143	1	47	47	GTACACACCTGATCCGCGTTTTCT	6	-	7596	11295
ENSDARG00000000606	ENSDART00000088143	1	48	48	ACAGTCATCACGAGGTCTGGTGGT	6	-	7791	11295
ENSDARG00000000606	ENSDART00000088143	1	48	48	TGCATCATCTGCAATGGCTTGAGTC	7	-	7665	11295
ENSDARG00000000606	ENSDART00000088143	1	49	49	GCCATCTCCCAGGAGCTGCTTTGCA	7	-	7863	11295
ENSDARG00000000606	ENSDART00000088143	1	49	49	GTTGCCATCTCCCAGGAGCTGCT	5	-	7868	11295
ENSDARG00000000606	ENSDART00000088143	1	49	49	GCCATCTCCCAGGAGCTGCTTTG	5	-	7865	11295
ENSDARG00000000606	ENSDART00000088143	1	49	49	GCAGCCAGCTTTTCTCGTTTAGGTC	7	-	8078	11295
ENSDARG00000000606	ENSDART00000088143	1	50	50	TCCTGCAAAACTTTGATTTGATTCT	7	-	8171	11295
ENSDARG00000000606	ENSDART00000088143	1	51	51	CTCATCACCCAGAGCAGATGTTAAC	7	-	8280	11295
ENSDARG00000000606	ENSDART00000088143	1	51	51	GTCAAAGCCATGGTTTTGGCTAC	5	-	8230	11295
ENSDARG00000000606	ENSDART00000088143	1	54	54	AACGTCTGCTTCAGAAGAATGGGCT	7	-	8792	11295
ENSDARG00000000606	ENSDART00000088143	1	54	54	ACAAACCTCAGGAAGGTAGTGGGG	6	-	8911	11295
ENSDARG00000000606	ENSDART00000088143	1	58	58	TCCAGCCCCTCTCAGGAAGTATAG	6	-	9556	11295
ENSDARG00000000606	ENSDART00000088143	1	58	58	CTCCACGCACAGCATGAAGCTGTA	6	-	9493	11295
ENSDARG00000000606	ENSDART00000088143	1	68	68	TCCCTCCACCTGCTGCTGAAGAA	5	-	10920	11295
ENSDARG00000000606	ENSDART00000088143	1	70	70	CCCAGCTGCCAAGAGGTTTGAGAG	6	-	11246	11295
ENSDARG00000000722	ENSDART00000049951	1	2	1	GACAGCACCTCATCATGCGAGGGG	6	+	40	1293
ENSDARG00000000722	ENSDART00000049951	1	2	1	CACCTCATCATGCGAGGGGCAGAC	6	+	45	1293
ENSDARG00000000722	ENSDART00000049951	1	2	1	CCCCAAAAATGAAAAGGAGGTTGAG	7	+	2	1293
ENSDARG00000000722	ENSDART00000049951	1	4	3	ATCTCCGCACTTACCGTGGTATTT	6	+	502	1293
ENSDARG00000000722	ENSDART00000049951	1	5	4	GTTTCCTGCAGCGCTTTTGTGGAG	6	+	1129	1293
ENSDARG00000000722	ENSDART00000049951	1	5	4	TCCAAACACCTAGGACGTGTTTGGT	7	+	1255	1293
ENSDARG00000000722	ENSDART00000049951	1	5	4	TCCTGCAGCGCTTTTGTGGAGTT	5	+	1132	1293
ENSDARG00000000722	ENSDART00000049951	1	5	4	TCCTGCAGCGCTTTTGTGGAGTTT	6	+	1132	1293
ENSDARG00000000722	ENSDART00000049951	1	5	4	GTCTGCGGCCACTGGATGAGGAG	5	+	1046	1293
ENSDARG00000000722	ENSDART00000049951	1	5	4	GTCTCCAAACACCTAGGACGTGTTT	7	+	1252	1293
ENSDARG00000000722	ENSDART00000049951	1	5	4	GCCCACGTCTGGTAGAGCTGGTGGT	7	+	1010	1293
ENSDARG00000000722	ENSDART00000049951	1	5	4	CTCCAAACACCTAGGACGTGTTT	5	+	1254	1293
ENSDARG00000000722	ENSDART00000049951	1	5	4	CACACCATCAAGAAGAGCAGCTGGG	7	+	826	1293
ENSDARG00000000722	ENSDART00000049951	1	5	4	AGCATCTGCGCATCGACGTGGTA	5	+	779	1293
ENSDARG00000000754	ENSDART00000077999	1	1	1	TCCAGCCCCTCTCAGGAAGTATAG	6	-	211	2511
ENSDARG00000000754	ENSDART00000077999	1	1	1	CTCCACGCACAGCATGAAGCTGTA	6	-	148	2511
ENSDARG00000000754	ENSDART00000077999	1	11	11	TCCCTCCACCTGCTGCTGAAGAA	5	-	1575	2511
ENSDARG00000000754	ENSDART00000077999	1	13	13	CCCAGCTGCCAAGAGGTTTGAGAG	6	-	1910	2511
ENSDARG00000000754	ENSDART00000077999	1	16	16	CACACCATCCTCTATGTTGGGGAG	6	-	2197	2511
ENSDARG00000000754	ENSDART00000077999	1	16	16	CACACCATCCTCTATGTTGGGGA	5	-	2198	2511
ENSDARG00000000754	ENSDART00000077999	1	16	16	ACCATCCTCTATGTTGGGGAGCT	5	-	2195	2511
ENSDARG00000000754	ENSDART00000077999	1	16	16	ACACCATCCTCTATGTTGGGGAGCT	7	-	2195	2511
ENSDARG00000000754	ENSDART00000077999	1	16	16	ACACCATCCTCTATGTTGGGGAG	5	-	2197	2511
ENSDARG00000000754	ENSDART00000077999	1	17	17	GTTACCACAAAATTGGTGGAGTG	5	-	2422	2511
ENSDARG00000000754	ENSDART00000077999	1	17	17	GTTACCACAAAATTGGTGGAGTGT	6	-	2421	2511
ENSDARG00000000754	ENSDART00000077999	1	17	17	GTTGGCAGAGCAGTGCAGAGGCT	5	-	2490	2511
ENSDARG00000001470	ENSDART00000101143	1	1	1	AAACTCACCGGTCCAGGCTGGTAC	6	-	58	1050
ENSDARG00000001470	ENSDART00000101143	1	2	2	TTCTTCTGCTCTTGGCTGTTGTA	5	-	184	1050
ENSDARG00000001470	ENSDART00000101143	1	3	3	ATCATCAAAGGCCAGGAAGTTTCT	6	-	448	1050
ENSDARG00000001470	ENSDART00000101143	1	4	4	CGCAAACACATGAACATCTGGGGGA	7	-	639	1050
ENSDARG00000001470	ENSDART00000101143	1	4	4	GCAAACACATGAACATCTGGGGGA	6	-	639	1050
ENSDARG00000001470	ENSDART00000101143	1	4	4	GTCAAAATCACATCTTTGGGGTA	5	-	721	1050
ENSDARG00000001470	ENSDART00000101143	1	4	4	AAAATCACATCTTTGGGGTAGAA	5	-	718	1050
ENSDARG00000001470	ENSDART00000101143	1	5	5	TACTCACCATTCTTGTATTTGCT	5	-	1026	1050
ENSDARG00000001870	ENSDART00000048828	1	2	2	GGCTTCATCTTCTGAAGTTGCCGCC	7	-	45	3072
ENSDARG00000001870	ENSDART00000048828	1	2	2	AGCTCATCCATGTCCTTTTGCTTCT	7	-	92	3072
ENSDARG00000001870	ENSDART00000048828	1	4	4	GACCCATTCTGGAGTGGTTGGTG	5	-	260	3072
ENSDARG00000001870	ENSDART00000048828	1	4	4	GAATCCTCCAAAGAGCTGCTTGC	5	-	290	3072
ENSDARG00000001870	ENSDART00000048828	1	4	4	GACCCATTCTGGAGTGGTTGGTGGA	7	-	258	3072
ENSDARG00000001870	ENSDART00000048828	1	4	4	AGAATCCTCCAAAGAGCTGCTTGC	6	-	290	3072
ENSDARG00000001870	ENSDART00000048828	1	4	4	AGAGGCCGCCTGGATGCCGTAGGC	6	-	352	3072
ENSDARG00000001870	ENSDART00000048828	1	7	7	AGATTCTCCAGTGAGGGAAGAGTTG	7	-	654	3072
ENSDARG00000001870	ENSDART00000048828	1	8	8	AGCCACTCCAGTGATGATGTGGAT	6	-	886	3072
ENSDARG00000001870	ENSDART00000048828	1	8	8	GACAGCCACTCCAGTGATGATGTG	6	-	889	3072
ENSDARG00000001870	ENSDART00000048828	1	9	9	GTCTGCTTCATGAATCTGGCTGT	5	-	1193	3072
ENSDARG00000001870	ENSDART00000048828	1	11	11	TTCATCTAAGGGCTGCTGTTTTC	5	-	1586	3072
ENSDARG00000001870	ENSDART00000048828	1	11	11	TTCTTCATCTAAGGGCTGCTGTT	5	-	1589	3072
ENSDARG00000001870	ENSDART00000048828	1	11	11	TTCATCACAAGCAAGTGTTTTGGCT	7	-	1511	3072
ENSDARG00000001870	ENSDART00000048828	1	11	11	TTCATCACAAGCAAGTGTTTTGGC	6	-	1512	3072
ENSDARG00000001870	ENSDART00000048828	1	16	16	CAATGCAGAGAATGGTGACGGTGCC	7	-	2419	3072
ENSDARG00000001870	ENSDART00000048828	1	18	18	TCCTACTAAATCGGAGGGGAGGAA	6	-	2644	3072
ENSDARG00000001870	ENSDART00000048828	1	19	19	ACAATCACAATACTGGCGAAGAA	5	-	2776	3072
ENSDARG00000001870	ENSDART00000048828	1	20	20	TTCTTCAAACAGGCCGAAGATGAG	6	-	2872	3072
ENSDARG00000001870	ENSDART00000048828	1	20	20	AGCTACGTCCATGCCTGGGCAGTA	6	-	2920	3072
ENSDARG00000001870	ENSDART00000048828	1	21	21	AGCTTCATCATAGACGAAGATGAG	6	-	3001	3072
ENSDARG00000001870	ENSDART00000103824	1	4	4	AGATTCTCCAGTGAGGGAAGAGTTG	7	-	273	2691
ENSDARG00000001870	ENSDART00000103824	1	5	5	AGCCACTCCAGTGATGATGTGGAT	6	-	505	2691
ENSDARG00000001870	ENSDART00000103824	1	5	5	GACAGCCACTCCAGTGATGATGTG	6	-	508	2691
ENSDARG00000001870	ENSDART00000103824	1	6	6	GTCTGCTTCATGAATCTGGCTGT	5	-	812	2691
ENSDARG00000001870	ENSDART00000103824	1	8	8	TTCATCACAAGCAAGTGTTTTGGCT	7	-	1130	2691
ENSDARG00000001870	ENSDART00000103824	1	8	8	TTCTTCATCTAAGGGCTGCTGTT	5	-	1208	2691
ENSDARG00000001870	ENSDART00000103824	1	8	8	TTCATCTAAGGGCTGCTGTTTTC	5	-	1205	2691
ENSDARG00000001870	ENSDART00000103824	1	8	8	TTCATCACAAGCAAGTGTTTTGGC	6	-	1131	2691
ENSDARG00000001870	ENSDART00000103824	1	13	13	CAATGCAGAGAATGGTGACGGTGCC	7	-	2038	2691
ENSDARG00000001870	ENSDART00000103824	1	15	15	TCCTACTAAATCGGAGGGGAGGAA	6	-	2263	2691
ENSDARG00000001870	ENSDART00000103824	1	16	16	ACAATCACAATACTGGCGAAGAA	5	-	2395	2691
ENSDARG00000001870	ENSDART00000103824	1	17	17	TTCTTCAAACAGGCCGAAGATGAG	6	-	2491	2691
ENSDARG00000001870	ENSDART00000103824	1	17	17	AGCTACGTCCATGCCTGGGCAGTA	6	-	2539	2691
ENSDARG00000001870	ENSDART00000103824	1	18	18	AGCTTCATCATAGACGAAGATGAG	6	-	2620	2691
ENSDARG00000001870	ENSDART00000103829	1	2	2	GGCTTCATCTTCTGAAGTTGCCGCC	7	-	45	3072
ENSDARG00000001870	ENSDART00000103829	1	2	2	AGCTCATCCATGTCCTTTTGCTTCT	7	-	92	3072
ENSDARG00000001870	ENSDART00000103829	1	4	4	AGAGGCCGCCTGGATGCCGTAGGC	6	-	352	3072
ENSDARG00000001870	ENSDART00000103829	1	4	4	AGAATCCTCCAAAGAGCTGCTTGC	6	-	290	3072
ENSDARG00000001870	ENSDART00000103829	1	4	4	GACCCATTCTGGAGTGGTTGGTGGA	7	-	258	3072
ENSDARG00000001870	ENSDART00000103829	1	4	4	GACCCATTCTGGAGTGGTTGGTG	5	-	260	3072
ENSDARG00000001870	ENSDART00000103829	1	4	4	GAATCCTCCAAAGAGCTGCTTGC	5	-	290	3072
ENSDARG00000001870	ENSDART00000103829	1	7	7	AGATTCTCCAGTGAGGGAAGAGTTG	7	-	654	3072
ENSDARG00000001870	ENSDART00000103829	1	8	8	AGCCACTCCAGTGATGATGTGGAT	6	-	886	3072
ENSDARG00000001870	ENSDART00000103829	1	8	8	GACAGCCACTCCAGTGATGATGTG	6	-	889	3072
ENSDARG00000001870	ENSDART00000103829	1	9	9	GTCTGCTTCATGAATCTGGCTGT	5	-	1193	3072
ENSDARG00000001870	ENSDART00000103829	1	11	11	TTCATCTAAGGGCTGCTGTTTTC	5	-	1586	3072
ENSDARG00000001870	ENSDART00000103829	1	11	11	TTCTTCATCTAAGGGCTGCTGTT	5	-	1589	3072
ENSDARG00000001870	ENSDART00000103829	1	11	11	TTCATCACAAGCAAGTGTTTTGGCT	7	-	1511	3072
ENSDARG00000001870	ENSDART00000103829	1	11	11	TTCATCACAAGCAAGTGTTTTGGC	6	-	1512	3072
ENSDARG00000001870	ENSDART00000103829	1	16	16	CAATGCAGAGAATGGTGACGGTGCC	7	-	2419	3072
ENSDARG00000001870	ENSDART00000103829	1	18	18	TCCTACTAAATCGGAGGGGAGGAA	6	-	2644	3072
ENSDARG00000001870	ENSDART00000103829	1	19	19	ACAATCACAATACTGGCGAAGAA	5	-	2776	3072
ENSDARG00000001870	ENSDART00000103829	1	20	20	AGCTACGTCCATGCCTGGGCAGTA	6	-	2920	3072
ENSDARG00000001870	ENSDART00000103829	1	20	20	TTCTTCAAACAGGCCGAAGATGAG	6	-	2872	3072
ENSDARG00000001870	ENSDART00000103829	1	21	21	AGCTTCATCATAGACGAAGATGAG	6	-	3001	3072
ENSDARG00000002190	ENSDART00000018472	1	2	2	TTCCTCGCAGCTCTTTGTTTTGTTC	7	-	55	642
ENSDARG00000002190	ENSDART00000018472	1	2	2	TTCCTCGCAGCTCTTTGTTTTGTT	6	-	56	642
ENSDARG00000002190	ENSDART00000018472	1	6	6	CTAGTCCACTCCAAGGGCTTTGAG	6	-	631	642
ENSDARG00000002190	ENSDART00000018472	1	6	6	CCCATCTGCTTTGGCCGTGGCGGCG	7	-	579	642
ENSDARG00000002285	ENSDART00000019646	1	3	3	AGACTATGCCGATTCAGATGACGCA	7	+	378	1743
ENSDARG00000002285	ENSDART00000019646	1	4	4	TTCATCATCGACCCGCTGGTGGT	5	+	589	1743
ENSDARG00000002285	ENSDART00000019646	1	10	10	CACTTCCACGCTGTTGGTCTGGGTT	7	+	1194	1743
ENSDARG00000002285	ENSDART00000019646	1	15	15	AGAACCACCACATATGAGGACGTC	6	+	1717	1743
ENSDARG00000002377	ENSDART00000019704	1	1	1	CCCAGCACCAGCCGTGCATTGGAC	6	-	72	1371
ENSDARG00000002377	ENSDART00000019704	1	1	1	TCCATCTTCTCCTCGCCTTTTAC	5	-	23	1371
ENSDARG00000002377	ENSDART00000019704	1	2	2	TTCCTCATCAGGAGGTCTGCCGGC	6	-	157	1371
ENSDARG00000002377	ENSDART00000019704	1	3	3	TCCATCCGCTTCCGCCTTTGAGGAG	7	-	341	1371
ENSDARG00000002377	ENSDART00000019704	1	3	3	CGCTTCCGCCTTTGAGGAGGAGGAG	7	-	335	1371
ENSDARG00000002377	ENSDART00000019704	1	3	3	CGCTTCCGCCTTTGAGGAGGAGGA	6	-	336	1371
ENSDARG00000002377	ENSDART00000019704	1	3	3	CGCGACACACACCTCCTCTGCGGAC	7	-	426	1371
ENSDARG00000002377	ENSDART00000019704	1	3	3	ATCCGCTTCCGCCTTTGAGGAGGAG	7	-	338	1371
ENSDARG00000002377	ENSDART00000019704	1	3	3	TACTGCTGCAGACGATCTGCAAAC	6	-	381	1371
ENSDARG00000002377	ENSDART00000019704	1	4	4	TGCGACACACCGCCTTTAGTGTTT	6	-	1091	1371
ENSDARG00000002377	ENSDART00000019704	1	4	4	TCCATCACCGCTTTGCTGAGTTG	5	-	772	1371
ENSDARG00000002377	ENSDART00000019704	1	4	4	GGCCAAGGCGCACTGTTGGCAAC	5	-	933	1371
ENSDARG00000002377	ENSDART00000019704	1	4	4	GCCTGCAGAAACCTGTTGGAGAA	5	-	1207	1371
ENSDARG00000002377	ENSDART00000019704	1	4	4	GCACCATGCAGTACTGAGGGTGAC	6	-	656	1371
ENSDARG00000002377	ENSDART00000019704	1	4	4	CACCTCGCACTCCAGGGTGCCGGT	6	-	817	1371
ENSDARG00000002377	ENSDART00000081134	1	6	4	TCCATCCGCTTCCGCCTTTGAGGAG	7	-	161	1191
ENSDARG00000002377	ENSDART00000081134	1	6	4	TACTGCTGCAGACGATCTGCAAAC	6	-	201	1191
ENSDARG00000002377	ENSDART00000081134	1	6	4	CGCTTCCGCCTTTGAGGAGGAGGAG	7	-	155	1191
ENSDARG00000002377	ENSDART00000081134	1	6	4	CGCTTCCGCCTTTGAGGAGGAGGA	6	-	156	1191
ENSDARG00000002377	ENSDART00000081134	1	6	4	CGCGACACACACCTCCTCTGCGGAC	7	-	246	1191
ENSDARG00000002377	ENSDART00000081134	1	6	4	ATCCGCTTCCGCCTTTGAGGAGGAG	7	-	158	1191
ENSDARG00000002377	ENSDART00000081134	1	7	5	TGCGACACACCGCCTTTAGTGTTT	6	-	911	1191
ENSDARG00000002377	ENSDART00000081134	1	7	5	TCCATCACCGCTTTGCTGAGTTG	5	-	592	1191
ENSDARG00000002377	ENSDART00000081134	1	7	5	CACCTCGCACTCCAGGGTGCCGGT	6	-	637	1191
ENSDARG00000002377	ENSDART00000081134	1	7	5	GGCCAAGGCGCACTGTTGGCAAC	5	-	753	1191
ENSDARG00000002377	ENSDART00000081134	1	7	5	GCCTGCAGAAACCTGTTGGAGAA	5	-	1027	1191
ENSDARG00000002377	ENSDART00000081134	1	7	5	GCACCATGCAGTACTGAGGGTGAC	6	-	476	1191
ENSDARG00000002377	ENSDART00000081150	1	1	1	TCCATCTTCTCCTCGCCTTTTAC	5	-	35	1386
ENSDARG00000002377	ENSDART00000081150	1	1	1	CCCAGCACCAGCCGTGCATTGGAC	6	-	84	1386
ENSDARG00000002377	ENSDART00000081150	1	2	2	TTCCTCATCAGGAGGTCTGCCGGC	6	-	169	1386
ENSDARG00000002377	ENSDART00000081150	1	4	4	CGCGACACACACCTCCTCTGCGGAC	7	-	441	1386
ENSDARG00000002377	ENSDART00000081150	1	4	4	CGCTTCCGCCTTTGAGGAGGAGGA	6	-	351	1386
ENSDARG00000002377	ENSDART00000081150	1	4	4	CGCTTCCGCCTTTGAGGAGGAGGAG	7	-	350	1386
ENSDARG00000002377	ENSDART00000081150	1	4	4	ATCCGCTTCCGCCTTTGAGGAGGAG	7	-	353	1386
ENSDARG00000002377	ENSDART00000081150	1	4	4	TCCATCCGCTTCCGCCTTTGAGGAG	7	-	356	1386
ENSDARG00000002377	ENSDART00000081150	1	4	4	TACTGCTGCAGACGATCTGCAAAC	6	-	396	1386
ENSDARG00000002377	ENSDART00000081150	1	5	5	TGCGACACACCGCCTTTAGTGTTT	6	-	1106	1386
ENSDARG00000002377	ENSDART00000081150	1	5	5	TCCATCACCGCTTTGCTGAGTTG	5	-	787	1386
ENSDARG00000002377	ENSDART00000081150	1	5	5	GGCCAAGGCGCACTGTTGGCAAC	5	-	948	1386
ENSDARG00000002377	ENSDART00000081150	1	5	5	GCCTGCAGAAACCTGTTGGAGAA	5	-	1222	1386
ENSDARG00000002377	ENSDART00000081150	1	5	5	GCACCATGCAGTACTGAGGGTGAC	6	-	671	1386
ENSDARG00000002377	ENSDART00000081150	1	5	5	CACCTCGCACTCCAGGGTGCCGGT	6	-	832	1386
ENSDARG00000002377	ENSDART00000103626	1	2	2	TCCATCCGCTTCCGCCTTTGAGGAG	7	-	185	687
ENSDARG00000002377	ENSDART00000103626	1	2	2	CGCTTCCGCCTTTGAGGAGGAGGAG	7	-	179	687
ENSDARG00000002377	ENSDART00000103626	1	2	2	CGCTTCCGCCTTTGAGGAGGAGGA	6	-	180	687
ENSDARG00000002377	ENSDART00000103626	1	2	2	CGCGACACACACCTCCTCTGCGGAC	7	-	270	687
ENSDARG00000002377	ENSDART00000103626	1	2	2	ATCCGCTTCCGCCTTTGAGGAGGAG	7	-	182	687
ENSDARG00000002377	ENSDART00000103626	1	2	2	TACTGCTGCAGACGATCTGCAAAC	6	-	225	687
ENSDARG00000002377	ENSDART00000103626	1	3	3	GCACCATGCAGTACTGAGGGTGAC	6	-	500	687
ENSDARG00000002406	ENSDART00000017413	1	1	1	TTCAGCTTCTTCGTGTAGAAGTA	5	-	20	1344
ENSDARG00000002406	ENSDART00000017413	1	2	2	GAATTCCTCCTGATTGGCGCTGGC	6	-	151	1344
ENSDARG00000002406	ENSDART00000017413	1	5	5	AGCGTCCCACTAGCAGTGTGAGTT	6	-	434	1344
ENSDARG00000002406	ENSDART00000017413	1	5	5	AGCGTCCCACTAGCAGTGTGAGTTT	7	-	433	1344
ENSDARG00000002406	ENSDART00000017413	1	10	10	ACATTCGTCACTTGGTATTTGGC	5	-	1066	1344
ENSDARG00000002406	ENSDART00000017413	1	11	11	ACATCCAGATTATACGTTTGAGCC	6	-	1134	1344
ENSDARG00000002406	ENSDART00000017413	1	11	11	ACAGGCTCCACATTTAGGTTTGTCT	7	-	1176	1344
ENSDARG00000002406	ENSDART00000017413	1	12	12	GAAAGCCTCTGCCATGAGGTTGCA	6	-	1297	1344
ENSDARG00000002634	ENSDART00000011977	1	1	1	ACCTGCAGAAGTACTGGAGTCGTG	6	+	276	642
ENSDARG00000002634	ENSDART00000011977	1	1	1	CACAAACTCACGGAGAATTGGGA	5	+	170	642
ENSDARG00000002634	ENSDART00000011977	1	2	2	TACACCCACCAAATGTGTGGCTCT	6	+	411	642
ENSDARG00000002634	ENSDART00000011977	1	2	2	GTATACACCCACCAAATGTGTGGCT	7	+	408	642
ENSDARG00000002634	ENSDART00000011977	1	2	2	AGAGACAGCTGCTGGATTATGGGAT	7	+	518	642
ENSDARG00000002634	ENSDART00000011977	1	2	2	ACACCCACCAAATGTGTGGCTCT	5	+	412	642
ENSDARG00000002634	ENSDART00000054801	1	1	1	ACCTGCAGAAGTACTGGAGTCGTG	6	+	276	642
ENSDARG00000002634	ENSDART00000054801	1	1	1	CACAAACTCACGGAGAATTGGGA	5	+	170	642
ENSDARG00000002634	ENSDART00000054801	1	2	2	TACACCCACCAAATGTGTGGCTCT	6	+	411	642
ENSDARG00000002634	ENSDART00000054801	1	2	2	GTATACACCCACCAAATGTGTGGCT	7	+	408	642
ENSDARG00000002634	ENSDART00000054801	1	2	2	AGAGACAGCTGCTGGATTATGGGAT	7	+	518	642
ENSDARG00000002634	ENSDART00000054801	1	2	2	ACACCCACCAAATGTGTGGCTCT	5	+	412	642
ENSDARG00000002634	ENSDART00000103445	1	2	2	ACCTGCAGAAGTACTGGAGTCGTG	6	+	237	1056
ENSDARG00000002634	ENSDART00000103445	1	2	2	CACAAACTCACGGAGAATTGGGA	5	+	131	1056
ENSDARG00000002634	ENSDART00000103445	1	3	3	TACACCCACCAAATGTGTGGCTCT	6	+	372	1056
ENSDARG00000002634	ENSDART00000103445	1	3	3	GTATACACCCACCAAATGTGTGGCT	7	+	369	1056
ENSDARG00000002634	ENSDART00000103445	1	3	3	AGAGACAGCTGCTGGATTATGGGAT	7	+	479	1056
ENSDARG00000002634	ENSDART00000103445	1	3	3	ACACCCACCAAATGTGTGGCTCT	5	+	373	1056
ENSDARG00000002634	ENSDART00000103445	1	4	4	TTACGCAGAGGCGCTGAAGGAGTA	6	+	564	1056
ENSDARG00000002634	ENSDART00000103445	1	5	5	TCCCAATAACTACTGGGGCTGGGGA	7	+	783	1056
ENSDARG00000002634	ENSDART00000103445	1	5	5	TCCCAATAACTACTGGGGCTGGG	5	+	783	1056
ENSDARG00000002634	ENSDART00000103445	1	6	6	AGACCAAGCGCAGAGATTGGGAA	5	+	862	1056
ENSDARG00000002791	ENSDART00000044583	1	2	2	CCCCCCTGCTCTGAGGTGGCTGCC	6	-	45	3084
ENSDARG00000002791	ENSDART00000044583	1	2	2	CCCCCCTGCTCTGAGGTGGCTGC	5	-	46	3084
ENSDARG00000002791	ENSDART00000044583	1	2	2	CACCAAGTCCACTTCTTTTTTGAG	6	-	121	3084
ENSDARG00000002791	ENSDART00000044583	1	2	2	CAAGTCCACTTCTTTTTTGAGTTC	6	-	118	3084
ENSDARG00000002791	ENSDART00000044583	1	2	2	CAAGTCCACTTCTTTTTTGAGTT	5	-	119	3084
ENSDARG00000002791	ENSDART00000044583	1	4	4	GACCCATTCTGGGGTTGTGGGAGGT	7	-	264	3084
ENSDARG00000002791	ENSDART00000044583	1	4	4	GAATCCTCCAAAGAGCTGCTTGC	5	-	296	3084
ENSDARG00000002791	ENSDART00000044583	1	4	4	AGAATCCTCCAAAGAGCTGCTTGC	6	-	296	3084
ENSDARG00000002791	ENSDART00000044583	1	4	4	AGAGGCCGCCAGGATGCCGTAGGC	6	-	358	3084
ENSDARG00000002791	ENSDART00000044583	1	6	6	AGCAACTTCTTCAGCGTTGATGTT	6	-	553	3084
ENSDARG00000002791	ENSDART00000044583	1	7	7	AGATTCTCCAGTGAGGGAGGAGTTG	7	-	660	3084
ENSDARG00000002791	ENSDART00000044583	1	7	7	AGATTCTCCAGTGAGGGAGGAGTT	6	-	661	3084
ENSDARG00000002791	ENSDART00000044583	1	8	8	AGCTACACCAGTGATGATGTGGAT	6	-	892	3084
ENSDARG00000002791	ENSDART00000044583	1	8	8	GACAGCTACACCAGTGATGATGTG	6	-	895	3084
ENSDARG00000002791	ENSDART00000044583	1	9	9	GCCAGCAACACGAGCGAGGGCGGC	6	-	1273	3084
ENSDARG00000002791	ENSDART00000044583	1	9	9	GAAGACGGCGCGGTTGCAGAGGCC	6	-	1294	3084
ENSDARG00000002791	ENSDART00000044583	1	9	9	GTCTGCTTCATGAATCTGGTTGT	5	-	1199	3084
ENSDARG00000002791	ENSDART00000044583	1	9	9	GTTCCACTCTGGTTCTCTGTGGTG	6	-	1221	3084
ENSDARG00000002791	ENSDART00000044583	1	9	9	TGCTCAGCAAGGAAGACGGCGCG	5	-	1306	3084
ENSDARG00000002791	ENSDART00000044583	1	14	14	GGCAAACACTATTTCAGTGTGGTGT	7	-	2073	3084
ENSDARG00000002791	ENSDART00000044583	1	14	14	ATCAGCTTCTGTTGAGGAGACGTT	6	-	2100	3084
ENSDARG00000002791	ENSDART00000044583	1	16	16	CAATACAGAGAATGGTGACGGTGCC	7	-	2431	3084
ENSDARG00000002791	ENSDART00000044583	1	17	17	CTCTCATTCACAAGTTTGTCTGT	5	-	2545	3084
ENSDARG00000002791	ENSDART00000044583	1	18	18	GAATGCCCAGCAGTGATGATGGT	5	-	2661	3084
ENSDARG00000002791	ENSDART00000044583	1	18	18	TGCCCAGCAGTGATGATGGTAGGAA	7	-	2656	3084
ENSDARG00000002791	ENSDART00000044583	1	19	19	TTCCTCTGCTCGTACGTCTGGGAT	6	-	2736	3084
ENSDARG00000002791	ENSDART00000044583	1	20	20	GAACAATCCAAAGATTAGAATCT	5	-	2879	3084
ENSDARG00000002791	ENSDART00000044583	1	21	21	GGCTGCGTCGGATGATAAGTTTTC	6	-	3038	3084
ENSDARG00000002791	ENSDART00000081047	1	2	2	CAAGTCCACTTCTTTTTTGAGTTC	6	-	118	3084
ENSDARG00000002791	ENSDART00000081047	1	2	2	CACCAAGTCCACTTCTTTTTTGAG	6	-	121	3084
ENSDARG00000002791	ENSDART00000081047	1	2	2	CCCCCCTGCTCTGAGGTGGCTGC	5	-	46	3084
ENSDARG00000002791	ENSDART00000081047	1	2	2	CCCCCCTGCTCTGAGGTGGCTGCC	6	-	45	3084
ENSDARG00000002791	ENSDART00000081047	1	2	2	CAAGTCCACTTCTTTTTTGAGTT	5	-	119	3084
ENSDARG00000002791	ENSDART00000081047	1	4	4	GAATCCTCCAAAGAGCTGCTTGC	5	-	296	3084
ENSDARG00000002791	ENSDART00000081047	1	4	4	GACCCATTCTGGGGTTGTGGGAGGT	7	-	264	3084
ENSDARG00000002791	ENSDART00000081047	1	4	4	AGAGGCCGCCAGGATGCCGTAGGC	6	-	358	3084
ENSDARG00000002791	ENSDART00000081047	1	4	4	AGAATCCTCCAAAGAGCTGCTTGC	6	-	296	3084
ENSDARG00000002791	ENSDART00000081047	1	6	6	AGCAACTTCTTCAGCGTTGATGTT	6	-	553	3084
ENSDARG00000002791	ENSDART00000081047	1	7	7	AGATTCTCCAGTGAGGGAGGAGTTG	7	-	660	3084
ENSDARG00000002791	ENSDART00000081047	1	7	7	AGATTCTCCAGTGAGGGAGGAGTT	6	-	661	3084
ENSDARG00000002791	ENSDART00000081047	1	8	8	GACAGCTACACCAGTGATGATGTG	6	-	895	3084
ENSDARG00000002791	ENSDART00000081047	1	8	8	AGCTACACCAGTGATGATGTGGAT	6	-	892	3084
ENSDARG00000002791	ENSDART00000081047	1	9	9	GTTCCACTCTGGTTCTCTGTGGTG	6	-	1221	3084
ENSDARG00000002791	ENSDART00000081047	1	9	9	GAAGACGGCGCGGTTGCAGAGGCC	6	-	1294	3084
ENSDARG00000002791	ENSDART00000081047	1	9	9	GTCTGCTTCATGAATCTGGTTGT	5	-	1199	3084
ENSDARG00000002791	ENSDART00000081047	1	9	9	TGCTCAGCAAGGAAGACGGCGCG	5	-	1306	3084
ENSDARG00000002791	ENSDART00000081047	1	9	9	GCCAGCAACACGAGCGAGGGCGGC	6	-	1273	3084
ENSDARG00000002791	ENSDART00000081047	1	14	14	ATCAGCTTCTGTTGAGGAGACGTT	6	-	2100	3084
ENSDARG00000002791	ENSDART00000081047	1	14	14	GGCAAACACTATTTCAGTGTGGTGT	7	-	2073	3084
ENSDARG00000002791	ENSDART00000081047	1	16	16	CAATACAGAGAATGGTGACGGTGCC	7	-	2431	3084
ENSDARG00000002791	ENSDART00000081047	1	17	17	CTCTCATTCACAAGTTTGTCTGT	5	-	2545	3084
ENSDARG00000002791	ENSDART00000081047	1	18	18	GAATGCCCAGCAGTGATGATGGT	5	-	2661	3084
ENSDARG00000002791	ENSDART00000081047	1	18	18	TGCCCAGCAGTGATGATGGTAGGAA	7	-	2656	3084
ENSDARG00000002791	ENSDART00000081047	1	19	19	TTCCTCTGCTCGTACGTCTGGGAT	6	-	2736	3084
ENSDARG00000002791	ENSDART00000081047	1	20	20	GAACAATCCAAAGATTAGAATCT	5	-	2879	3084
ENSDARG00000002791	ENSDART00000081047	1	21	21	GGCTGCGTCGGATGATAAGTTTTC	6	-	3038	3084
ENSDARG00000002840	ENSDART00000030593	1	1	1	TCCTCAACCGTCTTTGTATGGGCA	6	-	18	2547
ENSDARG00000002840	ENSDART00000030593	1	1	1	CTCCTCAACCGTCTTTGTATGGGCA	7	-	18	2547
ENSDARG00000002840	ENSDART00000030593	1	1	1	AGCACCTCCTCAACCGTCTTTGTA	6	-	24	2547
ENSDARG00000002840	ENSDART00000030593	1	2	2	TTCTTCTGCGGGTAACTCTGTGGCA	7	-	120	2547
ENSDARG00000002840	ENSDART00000030593	1	9	9	ACAGACATCTGGTTGGTGGTTAG	5	-	1075	2547
ENSDARG00000002840	ENSDART00000030593	1	14	14	AGCTGCTCCCTCAGGTCGGAGCT	5	-	1624	2547
ENSDARG00000002840	ENSDART00000030593	1	16	16	CAATGCGGCTCTTGTGTGTTGGCT	6	-	2069	2547
ENSDARG00000002840	ENSDART00000030593	1	16	16	ATCAAACTCTCGTCCTGTGAGGCC	6	-	1984	2547
ENSDARG00000002840	ENSDART00000030593	1	16	16	TCCTCCTGCTCGGTGATGATGCC	5	-	1930	2547
ENSDARG00000002840	ENSDART00000030593	1	16	16	TCCTCCTCCTGCTCGGTGATGAT	5	-	1933	2547
ENSDARG00000002840	ENSDART00000030593	1	16	16	CAATGCGGCTCTTGTGTGTTGGC	5	-	2070	2547
ENSDARG00000002840	ENSDART00000030593	1	16	16	CTCCTCCTCCTGCTCGGTGATGAT	6	-	1933	2547
ENSDARG00000002840	ENSDART00000030593	1	16	16	CTACAATGCGGCTCTTGTGTGTTG	6	-	2072	2547
ENSDARG00000002840	ENSDART00000030593	1	17	17	GACCACCTCTCCGATGTTAGAGGAA	7	-	2325	2547
ENSDARG00000002840	ENSDART00000030593	1	18	18	ACAGCCAGCTAGAGATGAGTGGTTC	7	-	2506	2547
ENSDARG00000002840	ENSDART00000046562	1	1	1	TCCTCAACCGTCTTTGTATGGGCA	6	-	18	2529
ENSDARG00000002840	ENSDART00000046562	1	1	1	AGCACCTCCTCAACCGTCTTTGTA	6	-	24	2529
ENSDARG00000002840	ENSDART00000046562	1	1	1	CTCCTCAACCGTCTTTGTATGGGCA	7	-	18	2529
ENSDARG00000002840	ENSDART00000046562	1	8	8	ACAGACATCTGGTTGGTGGTTAG	5	-	1057	2529
ENSDARG00000002840	ENSDART00000046562	1	13	13	AGCTGCTCCCTCAGGTCGGAGCT	5	-	1606	2529
ENSDARG00000002840	ENSDART00000046562	1	15	15	ATCAAACTCTCGTCCTGTGAGGCC	6	-	1966	2529
ENSDARG00000002840	ENSDART00000046562	1	15	15	CAATGCGGCTCTTGTGTGTTGGC	5	-	2052	2529
ENSDARG00000002840	ENSDART00000046562	1	15	15	CAATGCGGCTCTTGTGTGTTGGCT	6	-	2051	2529
ENSDARG00000002840	ENSDART00000046562	1	15	15	CTACAATGCGGCTCTTGTGTGTTG	6	-	2054	2529
ENSDARG00000002840	ENSDART00000046562	1	15	15	CTCCTCCTCCTGCTCGGTGATGAT	6	-	1915	2529
ENSDARG00000002840	ENSDART00000046562	1	15	15	TCCTCCTGCTCGGTGATGATGCC	5	-	1912	2529
ENSDARG00000002840	ENSDART00000046562	1	15	15	TCCTCCTCCTGCTCGGTGATGAT	5	-	1915	2529
ENSDARG00000002840	ENSDART00000046562	1	16	16	GACCACCTCTCCGATGTTAGAGGAA	7	-	2307	2529
ENSDARG00000002840	ENSDART00000046562	1	17	17	ACAGCCAGCTAGAGATGAGTGGTTC	7	-	2488	2529
ENSDARG00000002937	ENSDART00000028018	1	2	2	GTCCACTACGGCATGGATGCGGTC	6	+	34	1143
ENSDARG00000002937	ENSDART00000028018	1	2	2	CACTACGGCATGGATGCGGTCGGG	6	+	37	1143
ENSDARG00000002937	ENSDART00000028018	1	3	3	CTCGTCAGAGTCCTTTGACGAGGAT	7	+	318	1143
ENSDARG00000002937	ENSDART00000028018	1	4	4	CAACCCAGACTTGGATAATTTGGT	6	+	393	1143
ENSDARG00000002937	ENSDART00000028018	1	4	4	AACCCAGACTTGGATAATTTGGT	5	+	394	1143
ENSDARG00000002937	ENSDART00000028018	1	6	6	TACATCAGCTGCCTGAAGGGGAA	5	+	499	1143
ENSDARG00000002937	ENSDART00000028018	1	6	6	ATCAGCTGCCTGAAGGGGAAGAT	5	+	502	1143
ENSDARG00000002937	ENSDART00000028018	1	6	6	AGATGCCCATTGATTTGGTGGTGGA	7	+	521	1143
ENSDARG00000002937	ENSDART00000028018	1	7	7	CACTCCTGCGGCCTGCGGCAGAC	5	+	657	1143
ENSDARG00000002937	ENSDART00000028018	1	8	8	CTCCTAGCACAGGAGAGGAGGAA	5	+	746	1143
ENSDARG00000002937	ENSDART00000028018	1	8	8	CGCCTCTCCTAGCACAGGAGAGGAG	7	+	741	1143
ENSDARG00000002937	ENSDART00000028018	1	9	9	GTACCCTTCAGAAGAGCAGAAGAG	6	+	870	1143
ENSDARG00000002937	ENSDART00000100872	1	2	2	GTCCACTACGGCATGGATGCGGTC	6	+	34	1140
ENSDARG00000002937	ENSDART00000100872	1	2	2	CACTACGGCATGGATGCGGTCGGG	6	+	37	1140
ENSDARG00000002937	ENSDART00000100872	1	3	3	CTCGTCAGAGTCCTTTGACGAGGAT	7	+	318	1140
ENSDARG00000002937	ENSDART00000100872	1	4	4	AACCCAGACTTGGATAATTTGGT	5	+	394	1140
ENSDARG00000002937	ENSDART00000100872	1	4	4	CAACCCAGACTTGGATAATTTGGT	6	+	393	1140
ENSDARG00000002937	ENSDART00000100872	1	6	6	TACATCAGCTGCCTGAAGGGGAA	5	+	499	1140
ENSDARG00000002937	ENSDART00000100872	1	6	6	ATCAGCTGCCTGAAGGGGAAGAT	5	+	502	1140
ENSDARG00000002937	ENSDART00000100872	1	6	6	AGATGCCCATTGATTTGGTGGTGGA	7	+	521	1140
ENSDARG00000002937	ENSDART00000100872	1	7	7	CACTCCTGCGGCCTGCGGCAGAC	5	+	657	1140
ENSDARG00000002937	ENSDART00000100872	1	8	8	CGCCTCTCCTAGCACAGGAGAGGAG	7	+	741	1140
ENSDARG00000002937	ENSDART00000100872	1	8	8	CTCCTAGCACAGGAGAGGAGGAA	5	+	746	1140
ENSDARG00000002937	ENSDART00000100872	1	9	9	GTACCCTTCAGAAGAGCAGAAGAG	6	+	870	1140
ENSDARG00000002980	ENSDART00000006414	1	3	3	TCCGGCTTCATGAAGATCTGGAGAA	7	-	119	2418
ENSDARG00000002980	ENSDART00000006414	1	3	3	CAACACAGCATTAAAGGTGGCGGG	6	-	160	2418
ENSDARG00000002980	ENSDART00000006414	1	4	4	CGCCCCCACAAACTCTGAGGTGGAG	7	-	555	2418
ENSDARG00000002980	ENSDART00000006414	1	4	4	CCCCACAAACTCTGAGGTGGAGAG	6	-	553	2418
ENSDARG00000002980	ENSDART00000006414	1	4	4	CACGGCACATCACTCGGTCGATGGC	7	-	415	2418
ENSDARG00000002980	ENSDART00000006414	1	4	4	GCCCCCACAAACTCTGAGGTGGAG	6	-	555	2418
ENSDARG00000002980	ENSDART00000006414	1	4	4	ATCAGCTTCAGCTTGTTGTGCAGTT	7	-	488	2418
ENSDARG00000002980	ENSDART00000006414	1	4	4	AGCGCCCCCACAAACTCTGAGGTG	6	-	558	2418
ENSDARG00000002980	ENSDART00000006414	1	4	4	AGCAGCAGCTGTACGGTGGGCTGCG	7	-	530	2418
ENSDARG00000002980	ENSDART00000006414	1	4	4	AGCAGCAGCTGTACGGTGGGCTGC	6	-	531	2418
ENSDARG00000002980	ENSDART00000006414	1	4	4	TCCTGCTGCAGCACTTCTTTGGTG	6	-	597	2418
ENSDARG00000002980	ENSDART00000006414	1	4	4	TGCTGCAGCACTTCTTTGGTGGT	5	-	595	2418
ENSDARG00000002980	ENSDART00000006414	1	5	5	CTCTCCATCTCACACAGCTGAGAAC	7	-	653	2418
ENSDARG00000002980	ENSDART00000006414	1	5	5	CTCCTCAAAGGTTCGGCTGAGGTC	6	-	727	2418
ENSDARG00000002980	ENSDART00000006414	1	5	5	CTCCTCAAAGGTTCGGCTGAGGT	5	-	728	2418
ENSDARG00000002980	ENSDART00000006414	1	8	8	CTAGTCGACTCCTCTGGCTGCTGTC	7	-	964	2418
ENSDARG00000002980	ENSDART00000006414	1	9	9	GAACAAACCCTCGTGAGTGAGGT	5	-	1055	2418
ENSDARG00000002980	ENSDART00000006414	1	9	9	GCAGGCGTCTGCGCGCGGCGTCT	5	-	1148	2418
ENSDARG00000002980	ENSDART00000006414	1	9	9	GCAGGCGTCTGCGCGCGGCGTCTGT	7	-	1146	2418
ENSDARG00000002980	ENSDART00000006414	1	9	9	GGCCCCTACAGGCAGGCAGGAGGT	6	-	1234	2418
ENSDARG00000002980	ENSDART00000006414	1	10	10	GTCATCAGCACTTTGACGCAGCG	5	-	1366	2418
ENSDARG00000002980	ENSDART00000006414	1	11	11	CCCTCAGGCTGACACTGCGCCTGC	6	-	1490	2418
ENSDARG00000002980	ENSDART00000006414	1	12	12	CGCTCATTATCCAGCAGCAGACTGC	7	-	1577	2418
ENSDARG00000002980	ENSDART00000006414	1	12	12	AGATTCGTCCGTCAGCGATGGAGTC	7	-	1645	2418
ENSDARG00000002980	ENSDART00000006414	1	13	13	ACACACAGAAACTCAGTGGGCTTC	6	-	1710	2418
ENSDARG00000002980	ENSDART00000074034	1	5	5	TCCGGCTTCATGAAGATCTGGAGAA	7	-	521	2928
ENSDARG00000002980	ENSDART00000074034	1	5	5	CAACACAGCATTAAAGGTGGCGGG	6	-	562	2928
ENSDARG00000002980	ENSDART00000074034	1	6	6	GCCCCCACAAACTCTGAGGTGGAG	6	-	957	2928
ENSDARG00000002980	ENSDART00000074034	1	6	6	CCCCACAAACTCTGAGGTGGAGAG	6	-	955	2928
ENSDARG00000002980	ENSDART00000074034	1	6	6	CACGGCACATCACTCGGTCGATGGC	7	-	817	2928
ENSDARG00000002980	ENSDART00000074034	1	6	6	CGCCCCCACAAACTCTGAGGTGGAG	7	-	957	2928
ENSDARG00000002980	ENSDART00000074034	1	6	6	ATCAGCTTCAGCTTGTTGTGCAGTT	7	-	890	2928
ENSDARG00000002980	ENSDART00000074034	1	6	6	AGCGCCCCCACAAACTCTGAGGTG	6	-	960	2928
ENSDARG00000002980	ENSDART00000074034	1	6	6	AGCAGCAGCTGTACGGTGGGCTGCG	7	-	932	2928
ENSDARG00000002980	ENSDART00000074034	1	6	6	AGCAGCAGCTGTACGGTGGGCTGC	6	-	933	2928
ENSDARG00000002980	ENSDART00000074034	1	6	6	TCCTGCTGCAGCACTTCTTTGGTG	6	-	999	2928
ENSDARG00000002980	ENSDART00000074034	1	6	6	TGCTGCAGCACTTCTTTGGTGGT	5	-	997	2928
ENSDARG00000002980	ENSDART00000074034	1	7	7	CTCTCCATCTCACACAGCTGAGAAC	7	-	1055	2928
ENSDARG00000002980	ENSDART00000074034	1	7	7	CTCCTCAAAGGTTCGGCTGAGGT	5	-	1130	2928
ENSDARG00000002980	ENSDART00000074034	1	7	7	CTCCTCAAAGGTTCGGCTGAGGTC	6	-	1129	2928
ENSDARG00000002980	ENSDART00000074034	1	11	11	CTAGTCGACTCCTCTGGCTGCTGTC	7	-	1474	2928
ENSDARG00000002980	ENSDART00000074034	1	12	12	GGCCCCTACAGGCAGGCAGGAGGT	6	-	1744	2928
ENSDARG00000002980	ENSDART00000074034	1	12	12	GCAGGCGTCTGCGCGCGGCGTCTGT	7	-	1656	2928
ENSDARG00000002980	ENSDART00000074034	1	12	12	GCAGGCGTCTGCGCGCGGCGTCT	5	-	1658	2928
ENSDARG00000002980	ENSDART00000074034	1	12	12	GAACAAACCCTCGTGAGTGAGGT	5	-	1565	2928
ENSDARG00000002980	ENSDART00000074034	1	13	13	GTCATCAGCACTTTGACGCAGCG	5	-	1876	2928
ENSDARG00000002980	ENSDART00000074034	1	14	14	CCCTCAGGCTGACACTGCGCCTGC	6	-	2000	2928
ENSDARG00000002980	ENSDART00000074034	1	15	15	CGCTCATTATCCAGCAGCAGACTGC	7	-	2087	2928
ENSDARG00000002980	ENSDART00000074034	1	15	15	AGATTCGTCCGTCAGCGATGGAGTC	7	-	2155	2928
ENSDARG00000002980	ENSDART00000074034	1	16	16	ACACACAGAAACTCAGTGGGCTTC	6	-	2220	2928
ENSDARG00000003046	ENSDART00000004908	1	3	3	GGCTCCAGAGGTGTTAGTGGAGGTT	7	-	306	2616
ENSDARG00000003046	ENSDART00000004908	1	3	3	GAATGCTCCTTTTGGCTTAGTTT	5	-	482	2616
ENSDARG00000003046	ENSDART00000004908	1	5	5	GAAATCAGAATTATTCTGTAGTA	5	-	644	2616
ENSDARG00000003046	ENSDART00000004908	1	7	7	GTCCAATGCCTTCGTAATGGGGA	5	-	954	2616
ENSDARG00000003046	ENSDART00000004908	1	10	10	GAAGGCATCGGAGGGGGCGGCGGG	6	-	1257	2616
ENSDARG00000003046	ENSDART00000004908	1	10	10	GAAGGCATCGGAGGGGGCGGCGGGG	7	-	1256	2616
ENSDARG00000003046	ENSDART00000004908	1	13	13	TCCAACCTCTTTTTAGGAGGCTGAA	7	-	1532	2616
ENSDARG00000003046	ENSDART00000004908	1	19	19	ATCCCAATCCGCCCTCTGTGTTC	5	-	2041	2616
ENSDARG00000003046	ENSDART00000004908	1	19	19	GACCTCGACATAAGAGATGGGGAA	6	-	2065	2616
ENSDARG00000003046	ENSDART00000041215	1	4	4	GTCCAATGCCTTCGTAATGGGGA	5	-	420	3624
ENSDARG00000003046	ENSDART00000041215	1	7	7	GAAGGCATCGGAGGGGGCGGCGGGG	7	-	722	3624
ENSDARG00000003046	ENSDART00000041215	1	7	7	GAAGGCATCGGAGGGGGCGGCGGG	6	-	723	3624
ENSDARG00000003046	ENSDART00000041215	1	11	11	GCCCACTTCTGCAGTGCCGCCGCT	6	-	2471	3624
ENSDARG00000003046	ENSDART00000041215	1	11	11	GGCAACTTACGCCGGTGATGACGGC	7	-	1556	3624
ENSDARG00000003046	ENSDART00000041215	1	11	11	GTACTATGCTGGTTGTTGTTGGA	5	-	2776	3624
ENSDARG00000003046	ENSDART00000041215	1	11	11	TGCATCTTCTTGTAGAGCTGAAGGA	7	-	1598	3624
ENSDARG00000003046	ENSDART00000041215	1	11	11	TGCCGCCGCTGAGTTGGTGGGGA	5	-	2458	3624
ENSDARG00000003046	ENSDART00000041215	1	11	11	TGCCGCCGCTGAGTTGGTGGGGAG	6	-	2457	3624
ENSDARG00000003046	ENSDART00000041215	1	11	11	GACGGCGGCCCCTGGGAGATGAG	5	-	1539	3624
ENSDARG00000003046	ENSDART00000041215	1	11	11	AGCTTCTTCATCAATAAGTGAAC	5	-	1490	3624
ENSDARG00000003046	ENSDART00000041215	1	11	11	GACCTACACTCTGGTGATGGTGGC	6	-	2204	3624
ENSDARG00000003046	ENSDART00000041215	1	11	11	GACAGCGGCCCTTGCAGGAGCTGAT	7	-	2257	3624
ENSDARG00000003046	ENSDART00000041215	1	11	11	CTCCCATTATTATTGGTGGTAGCA	6	-	1425	3624
ENSDARG00000003046	ENSDART00000041215	1	11	11	CGCTGCTCCAGTTCTCTGTATTT	5	-	1320	3624
ENSDARG00000003046	ENSDART00000041215	1	11	11	CACTTCTGCAGTGCCGCCGCTGAG	6	-	2468	3624
ENSDARG00000003046	ENSDART00000041215	1	11	11	AAAAGCGTCGCTTGGGGCAGCTGCT	7	-	1882	3624
ENSDARG00000003046	ENSDART00000041215	1	15	15	GACCTCGACATAAGAGATGGGGAA	6	-	3073	3624
ENSDARG00000003046	ENSDART00000041215	1	15	15	ATCCCAATCCGCCCTCTGTGTTC	5	-	3049	3624
ENSDARG00000003046	ENSDART00000043870	1	4	4	GTCCAATGCCTTCGTAATGGGGA	5	-	414	2235
ENSDARG00000003046	ENSDART00000043870	1	7	7	GAAGGCATCGGAGGGGGCGGCGGG	6	-	717	2235
ENSDARG00000003046	ENSDART00000043870	1	7	7	GAAGGCATCGGAGGGGGCGGCGGGG	7	-	716	2235
ENSDARG00000003046	ENSDART00000043870	1	11	11	CTAAAATACATTACTTAGGGTAA	5	-	1058	2235
ENSDARG00000003046	ENSDART00000043870	1	13	13	TCCAACCTCTTTTTAGGAGGCTGAA	7	-	1151	2235
ENSDARG00000003046	ENSDART00000043870	1	19	19	GACCTCGACATAAGAGATGGGGAA	6	-	1684	2235
ENSDARG00000003046	ENSDART00000043870	1	19	19	ATCCCAATCCGCCCTCTGTGTTC	5	-	1660	2235
ENSDARG00000003046	ENSDART00000054688	1	1	1	CTCTTCACAGGCCACAGAGTGAGTG	7	-	53	3678
ENSDARG00000003046	ENSDART00000054688	1	1	1	CACATCCTCCGCTATCTGGAGTA	5	-	9	3678
ENSDARG00000003046	ENSDART00000054688	1	1	1	ATCCTCCGCTATCTGGAGTATCT	5	-	6	3678
ENSDARG00000003046	ENSDART00000054688	1	1	1	ACATCCTCCGCTATCTGGAGTATCT	7	-	6	3678
ENSDARG00000003046	ENSDART00000054688	1	5	5	GTCCAATGCCTTCGTAATGGGGA	5	-	507	3678
ENSDARG00000003046	ENSDART00000054688	1	8	8	GAAGGCATCGGAGGGGGCGGCGGGG	7	-	809	3678
ENSDARG00000003046	ENSDART00000054688	1	8	8	GAAGGCATCGGAGGGGGCGGCGGG	6	-	810	3678
ENSDARG00000003046	ENSDART00000054688	1	12	12	GACGGCGGCCCCTGGGAGATGAG	5	-	1596	3678
ENSDARG00000003046	ENSDART00000054688	1	12	12	GACCTACACTCTGGTGATGGTGGC	6	-	2261	3678
ENSDARG00000003046	ENSDART00000054688	1	12	12	GACAGCGGCCCTTGCAGGAGCTGAT	7	-	2314	3678
ENSDARG00000003046	ENSDART00000054688	1	12	12	TGCATCTTCTTGTAGAGCTGAAGGA	7	-	1655	3678
ENSDARG00000003046	ENSDART00000054688	1	12	12	GGCAACTTACGCCGGTGATGACGGC	7	-	1613	3678
ENSDARG00000003046	ENSDART00000054688	1	12	12	AAAAGCGTCGCTTGGGGCAGCTGCT	7	-	1939	3678
ENSDARG00000003046	ENSDART00000054688	1	12	12	CTCCCATTATTATTGGTGGTAGCA	6	-	1482	3678
ENSDARG00000003046	ENSDART00000054688	1	12	12	CGCTGCTCCAGTTCTCTGTATTT	5	-	1377	3678
ENSDARG00000003046	ENSDART00000054688	1	12	12	AGCTTCTTCATCAATAAGTGAAC	5	-	1547	3678
ENSDARG00000003046	ENSDART00000054688	1	13	13	TGCCGCCGCTGAGTTGGTGGGGA	5	-	2500	3678
ENSDARG00000003046	ENSDART00000054688	1	13	13	GTACTATGCTGGTTGTTGTTGGA	5	-	2818	3678
ENSDARG00000003046	ENSDART00000054688	1	13	13	TGCCGCCGCTGAGTTGGTGGGGAG	6	-	2499	3678
ENSDARG00000003046	ENSDART00000054688	1	13	13	GCCCACTTCTGCAGTGCCGCCGCT	6	-	2513	3678
ENSDARG00000003046	ENSDART00000054688	1	13	13	CACTTCTGCAGTGCCGCCGCTGAG	6	-	2510	3678
ENSDARG00000003046	ENSDART00000054688	1	17	17	GACCTCGACATAAGAGATGGGGAA	6	-	3127	3678
ENSDARG00000003046	ENSDART00000054688	1	17	17	ATCCCAATCCGCCCTCTGTGTTC	5	-	3103	3678
ENSDARG00000003046	ENSDART00000054688	1	20	20	GAATCCCACTTAAAATAATGGGAG	6	-	3441	3678
ENSDARG00000003054	ENSDART00000003278	1	1	1	GTACCACTCTCCGTGCGTGGCGTAA	7	-	261	987
ENSDARG00000003054	ENSDART00000003278	1	1	1	GTAAGCGACCGACCAGACGGCGAC	6	-	82	987
ENSDARG00000003054	ENSDART00000003278	1	1	1	GACGGCGACCCGCCACGGCGGCTGC	7	-	66	987
ENSDARG00000003054	ENSDART00000003278	1	1	1	AGCAAAAAATAGTTGGTGACGGT	5	-	181	987
ENSDARG00000003054	ENSDART00000003278	1	2	2	ACAATCACCACTTTAGTAGCCGTG	6	-	420	987
ENSDARG00000003054	ENSDART00000003278	1	3	3	CCCATCACCACTAGGGGCAGCATGT	7	-	596	987
ENSDARG00000003054	ENSDART00000003278	1	3	3	ACCTTCCTCTTAGCACGTAGCTGTC	7	-	695	987
ENSDARG00000003054	ENSDART00000003278	1	3	3	AACCCCGACTATAGTGTAGGTGAT	6	-	622	987
ENSDARG00000003054	ENSDART00000003278	1	4	4	GACTTCCACTTGTTCAGGCGTTTGT	7	-	803	987
ENSDARG00000003054	ENSDART00000003278	1	4	4	TACGGCAACCAGCAGAGGGCGAA	5	-	751	987
ENSDARG00000003054	ENSDART00000003278	1	5	5	GAAGCCCGCGCGAAATCTGGAGGA	6	-	907	987
ENSDARG00000003142	ENSDART00000018827	1	2	2	GGCTTCAGCGAGTGTCGCAGCTGTT	7	-	144	1239
ENSDARG00000003142	ENSDART00000018827	1	4	4	ATCCAAAGAGGGTACAGGTGACGGA	7	-	456	1239
ENSDARG00000003142	ENSDART00000018827	1	4	4	CGCTGCTGCTCTGTCTGGAGGATAA	7	-	505	1239
ENSDARG00000003142	ENSDART00000018827	1	4	4	ACACGCTGCTGCTCTGTCTGGAGGA	7	-	508	1239
ENSDARG00000003142	ENSDART00000018827	1	7	7	TTCTGCTCCACACAGAGCTGTCTCT	7	-	971	1239
ENSDARG00000003142	ENSDART00000018827	1	8	8	ACCTCCAGAGCCTCCTGCAGTTTTC	7	-	1046	1239
ENSDARG00000003142	ENSDART00000018827	1	8	8	TTCTTCTCCTTCTTCAGTCGCTTCT	7	-	1013	1239
ENSDARG00000003384	ENSDART00000021662	1	1	1	GACGGCAGAGAATAAAGTGGACTTC	7	+	33	1284
ENSDARG00000003384	ENSDART00000021662	1	1	1	TCCCAACGCGCCACGACTGGGAC	5	+	56	1284
ENSDARG00000003384	ENSDART00000021662	1	1	1	GCCATCAGAGGCCGTGCTGAAAAC	6	+	198	1284
ENSDARG00000003384	ENSDART00000021662	1	2	2	AGCGACAGAAGCTACAGGAGCTGGA	7	+	515	1284
ENSDARG00000003384	ENSDART00000021662	1	2	2	AAACGCAGAGAGAAGGAGGACGAA	6	+	559	1284
ENSDARG00000003384	ENSDART00000021662	1	2	2	AGCGACGCAAAGAGGAGGAGAGGTG	7	+	584	1284
ENSDARG00000003384	ENSDART00000021662	1	8	8	TACGGCTACTGGCGGAGCTGCTGAG	7	+	845	1284
ENSDARG00000003384	ENSDART00000021662	1	9	9	GTCTGCAGCAGCTGCAGCAGCGGCG	7	+	917	1284
ENSDARG00000003384	ENSDART00000021662	1	9	9	CGCAGCCGCTCCACCAGCAGAGGCA	7	+	1237	1284
ENSDARG00000003384	ENSDART00000021662	1	9	9	TGCGTCTGCAGCAGCTGCAGCAGCG	7	+	914	1284
ENSDARG00000003384	ENSDART00000021662	1	9	9	TGCAGCAGCTGCAGCAGCGGCGGCG	7	+	920	1284
ENSDARG00000003384	ENSDART00000021662	1	9	9	CGCTCCACCAGCAGAGGCAGACGCA	7	+	1243	1284
ENSDARG00000003384	ENSDART00000021662	1	9	9	AGCAGCTGCAGCAGCGGCGGCGTG	6	+	923	1284
ENSDARG00000003384	ENSDART00000021662	1	9	9	TCCACCAGCAGAGGCAGACGCAGAC	7	+	1246	1284
ENSDARG00000003384	ENSDART00000021662	1	9	9	GCACACACACACGCAGCCGGCGGC	6	+	1169	1284
ENSDARG00000003384	ENSDART00000021662	1	9	9	GCAGCCGGCGGCGGCGGCGCAGCA	6	+	1181	1284
ENSDARG00000003384	ENSDART00000021662	1	9	9	CACAGCCACGGCCAGAGCAGCAGCC	7	+	1207	1284
ENSDARG00000003384	ENSDART00000021662	1	9	9	AGCTGCGGCGTGTGGAGCAGGAGAA	7	+	959	1284
ENSDARG00000003384	ENSDART00000021662	1	9	9	AGCTGCAGCAGCGGCGGCGTGAGCA	7	+	926	1284
ENSDARG00000003384	ENSDART00000021662	1	9	9	AAAAGCAGAGCGCTGGAGCTGCA	5	+	982	1284
ENSDARG00000003384	ENSDART00000021662	1	9	9	ACACACACACGCAGCCGGCGGCGGC	7	+	1171	1284
ENSDARG00000003384	ENSDART00000021662	1	9	9	ACACACGCACAGAGAGACGATGAC	6	+	1060	1284
ENSDARG00000003384	ENSDART00000021662	1	9	9	ACACACGCAGCCGGCGGCGGCGGC	6	+	1175	1284
ENSDARG00000003384	ENSDART00000021662	1	9	9	ACACACGCAGCCGGCGGCGGCGGCG	7	+	1175	1284
ENSDARG00000003384	ENSDART00000021662	1	9	9	ACACGCAGCCGGCGGCGGCGGCG	5	+	1177	1284
ENSDARG00000003384	ENSDART00000021662	1	9	9	ACACGCAGCCGGCGGCGGCGGCGCA	7	+	1177	1284
ENSDARG00000003384	ENSDART00000021662	1	9	9	AGCAGCAGCCGGAGCCGCAGCCGCT	7	+	1222	1284
ENSDARG00000003384	ENSDART00000021662	1	9	9	AGCAGCGGCGGCGTGAGCAGGAGCA	7	+	932	1284
ENSDARG00000003384	ENSDART00000021662	1	9	9	AGCCACGGCCAGAGCAGCAGCCGGA	7	+	1210	1284
ENSDARG00000003384	ENSDART00000021662	1	9	9	AGCCGCTCCACCAGCAGAGGCAGAC	7	+	1240	1284
ENSDARG00000003384	ENSDART00000021662	1	9	9	AGCGGCGGCGTGAGCAGGAGCAGGA	7	+	935	1284
ENSDARG00000003384	ENSDART00000101481	1	1	1	GACGGCAGAGAATAAAGTGGACTTC	7	+	48	1305
ENSDARG00000003384	ENSDART00000101481	1	1	1	GCCATCAGAGGCCGTGCTGAAAAC	6	+	213	1305
ENSDARG00000003384	ENSDART00000101481	1	1	1	TCCCAACGCGCCACGACTGGGAC	5	+	71	1305
ENSDARG00000003384	ENSDART00000101481	1	2	2	AAACGCAGAGAGAAGGAGGACGAA	6	+	574	1305
ENSDARG00000003384	ENSDART00000101481	1	2	2	AGCGACGCAAAGAGGAGGAGAGGTG	7	+	599	1305
ENSDARG00000003384	ENSDART00000101481	1	2	2	AGCGACAGAAGCTACAGGAGCTGGA	7	+	530	1305
ENSDARG00000003384	ENSDART00000101481	1	5	5	GTTATCAGCTGTGAGGTTGGGTT	5	+	673	1305
ENSDARG00000003384	ENSDART00000101481	1	6	6	AGCCAACACAAGCCTGATGTTTAC	6	+	714	1305
ENSDARG00000003384	ENSDART00000101481	1	6	6	GCCAACACAAGCCTGATGTTTAC	5	+	715	1305
ENSDARG00000003384	ENSDART00000101481	1	8	8	TACGGCTACTGGCGGAGCTGCTGAG	7	+	866	1305
ENSDARG00000003384	ENSDART00000101481	1	9	9	GCACACACACACGCAGCCGGCGGC	6	+	1190	1305
ENSDARG00000003384	ENSDART00000101481	1	9	9	GCAGCCGGCGGCGGCGGCGCAGCA	6	+	1202	1305
ENSDARG00000003384	ENSDART00000101481	1	9	9	ACACACACACGCAGCCGGCGGCGGC	7	+	1192	1305
ENSDARG00000003384	ENSDART00000101481	1	9	9	GTCTGCAGCAGCTGCAGCAGCGGCG	7	+	938	1305
ENSDARG00000003384	ENSDART00000101481	1	9	9	ACACGCAGCCGGCGGCGGCGGCGCA	7	+	1198	1305
ENSDARG00000003384	ENSDART00000101481	1	9	9	ACACACGCAGCCGGCGGCGGCGGCG	7	+	1196	1305
ENSDARG00000003384	ENSDART00000101481	1	9	9	TCCACCAGCAGAGGCAGACGCAGAC	7	+	1267	1305
ENSDARG00000003384	ENSDART00000101481	1	9	9	AAAAGCAGAGCGCTGGAGCTGCA	5	+	1003	1305
ENSDARG00000003384	ENSDART00000101481	1	9	9	TGCAGCAGCTGCAGCAGCGGCGGCG	7	+	941	1305
ENSDARG00000003384	ENSDART00000101481	1	9	9	TGCGTCTGCAGCAGCTGCAGCAGCG	7	+	935	1305
ENSDARG00000003384	ENSDART00000101481	1	9	9	ACACACGCACAGAGAGACGATGAC	6	+	1081	1305
ENSDARG00000003384	ENSDART00000101481	1	9	9	CGCTCCACCAGCAGAGGCAGACGCA	7	+	1264	1305
ENSDARG00000003384	ENSDART00000101481	1	9	9	CGCAGCCGCTCCACCAGCAGAGGCA	7	+	1258	1305
ENSDARG00000003384	ENSDART00000101481	1	9	9	AGCAGCAGCCGGAGCCGCAGCCGCT	7	+	1243	1305
ENSDARG00000003384	ENSDART00000101481	1	9	9	AGCAGCGGCGGCGTGAGCAGGAGCA	7	+	953	1305
ENSDARG00000003384	ENSDART00000101481	1	9	9	AGCAGCTGCAGCAGCGGCGGCGTG	6	+	944	1305
ENSDARG00000003384	ENSDART00000101481	1	9	9	ACACGCAGCCGGCGGCGGCGGCG	5	+	1198	1305
ENSDARG00000003384	ENSDART00000101481	1	9	9	AGCCACGGCCAGAGCAGCAGCCGGA	7	+	1231	1305
ENSDARG00000003384	ENSDART00000101481	1	9	9	AGCCGCTCCACCAGCAGAGGCAGAC	7	+	1261	1305
ENSDARG00000003384	ENSDART00000101481	1	9	9	ACACACGCAGCCGGCGGCGGCGGC	6	+	1196	1305
ENSDARG00000003384	ENSDART00000101481	1	9	9	AGCGGCGGCGTGAGCAGGAGCAGGA	7	+	956	1305
ENSDARG00000003384	ENSDART00000101481	1	9	9	AGCTGCAGCAGCGGCGGCGTGAGCA	7	+	947	1305
ENSDARG00000003384	ENSDART00000101481	1	9	9	AGCTGCGGCGTGTGGAGCAGGAGAA	7	+	980	1305
ENSDARG00000003384	ENSDART00000101481	1	9	9	CACAGCCACGGCCAGAGCAGCAGCC	7	+	1228	1305
ENSDARG00000003398	ENSDART00000005067	1	2	2	AGCTCCCTCAGCCAAAGCGTTTAAC	7	+	41	1488
ENSDARG00000003398	ENSDART00000005067	1	5	5	TTCCAAAAAGAAACAGTCGCTGAA	6	+	471	1488
ENSDARG00000003398	ENSDART00000005067	1	6	6	GTTCACAACAGTGGGGAGCCTTC	5	+	608	1488
ENSDARG00000003398	ENSDART00000005067	1	8	8	GCAGACAGCGCTAATGGACGCCGAC	7	+	777	1488
ENSDARG00000003398	ENSDART00000005067	1	8	8	CCCAACTACATAAATGTGCCTTC	5	+	812	1488
ENSDARG00000003398	ENSDART00000005067	1	9	9	ATCAGCACAGACAAAGCAGAGTAC	6	+	961	1488
ENSDARG00000003398	ENSDART00000005067	1	10	10	TTACGCCCAACCTCAGAGTTTGGT	6	+	1103	1488
ENSDARG00000003398	ENSDART00000005067	1	10	10	CCCAACCTCAGAGTTTGGTTTGGA	6	+	1108	1488
ENSDARG00000003398	ENSDART00000005067	1	10	10	CGCCCAACCTCAGAGTTTGGTTT	5	+	1106	1488
ENSDARG00000003398	ENSDART00000005067	1	10	10	CGCCCAACCTCAGAGTTTGGTTTG	6	+	1106	1488
ENSDARG00000003398	ENSDART00000005067	1	10	10	CCCAACCTCAGAGTTTGGTTTGGAG	7	+	1108	1488
ENSDARG00000003398	ENSDART00000005067	1	10	10	AACCTCAGAGTTTGGTTTGGAGAT	6	+	1111	1488
ENSDARG00000003398	ENSDART00000005067	1	11	11	TACGGCGCATCAGGAGGAGTATCT	6	+	1444	1488
ENSDARG00000003398	ENSDART00000005067	1	11	11	GCCTCCAGCCTATTGCTGCAGTC	5	+	1399	1488
ENSDARG00000003398	ENSDART00000005067	1	11	11	GCCGTCGACAGCCAGGCAGGATAC	6	+	1423	1488
ENSDARG00000003398	ENSDART00000005067	1	11	11	CTACTCCACGGCTTTGACTTTTAC	6	+	1275	1488
ENSDARG00000003398	ENSDART00000005067	1	11	11	ATCTACTCCACGGCTTTGACTTT	5	+	1273	1488
ENSDARG00000003398	ENSDART00000005067	1	11	11	ATCATCTACTCCACGGCTTTGAC	5	+	1270	1488
ENSDARG00000003398	ENSDART00000103327	1	2	2	AGCTCCCTCAGCCAAAGCGTTTAAC	7	+	41	933
ENSDARG00000003398	ENSDART00000103327	1	5	5	TTCCAAAAAGAAACAGTCGCTGAA	6	+	471	933
ENSDARG00000003398	ENSDART00000103327	1	6	6	GTTCACAACAGTGGGGAGCCTTC	5	+	608	933
ENSDARG00000003398	ENSDART00000103327	1	8	8	GCAGACAGCGCTAATGGACGCCGAC	7	+	777	933
ENSDARG00000003398	ENSDART00000103327	1	8	8	CCCAACTACATAAATGTGCCTTC	5	+	812	933
ENSDARG00000003631	ENSDART00000012552	1	4	4	GTTTTCGCAGCTGATGCTGGAGGT	6	+	309	2445
ENSDARG00000003631	ENSDART00000012552	1	7	7	AGAACCAGATGGAGTTTTGTTGTC	6	+	542	2445
ENSDARG00000003631	ENSDART00000012552	1	8	8	GAATTCTGCAGCATTCGTTGCAGCC	7	+	683	2445
ENSDARG00000003631	ENSDART00000012552	1	9	9	CTCGACACAGTCTGGAGTGGAAGTT	7	+	812	2445
ENSDARG00000003631	ENSDART00000012552	1	13	13	TTAAACAACAGTCTGAAGAAGGT	5	+	1207	2445
ENSDARG00000003631	ENSDART00000012552	1	16	16	ACATTCAAAAGCAGCAGGAGGAGCT	7	+	1607	2445
ENSDARG00000003631	ENSDART00000012552	1	16	16	TTCAAAAGCAGCAGGAGGAGCTGAG	7	+	1610	2445
ENSDARG00000003631	ENSDART00000012552	1	16	16	CTCAGCACAGCTGAATGCGATGCA	6	+	1536	2445
ENSDARG00000003631	ENSDART00000012552	1	16	16	GAACACGCATGATAGAAGCCAAC	5	+	1586	2445
ENSDARG00000003631	ENSDART00000012552	1	16	16	TGCAGCACCTGAAGGAGCAGCTGGA	7	+	1556	2445
ENSDARG00000003631	ENSDART00000012552	1	17	17	AGACTCCTCGATCCCTGCAGCAGAA	7	+	1859	2445
ENSDARG00000003631	ENSDART00000012552	1	17	17	GCAGCCGGCTCAGGGTGGTGGGCC	6	+	1686	2445
ENSDARG00000003631	ENSDART00000012552	1	17	17	GCAGCCGGCTCAGGGTGGTGGGC	5	+	1686	2445
ENSDARG00000003631	ENSDART00000012552	1	18	18	TGCCAATGCCAATGTTGTGCAGAT	6	+	1947	2445
ENSDARG00000003631	ENSDART00000012552	1	19	19	GCCCACGTCGATGTTTATGGGTC	5	+	2088	2445
ENSDARG00000003631	ENSDART00000012552	1	19	19	GTTTCCAGCCGGGCAGCAGTTGGT	6	+	2019	2445
ENSDARG00000003631	ENSDART00000012552	1	19	19	GACGGCTCCAATGGCGTGTGGCGCA	7	+	2055	2445
ENSDARG00000003631	ENSDART00000012552	1	19	19	CACAACAACAGGGTCAGACGCAGAC	7	+	2138	2445
ENSDARG00000003631	ENSDART00000103116	1	3	3	GTTTTCGCAGCTGATGCTGGAGGT	6	+	309	2544
ENSDARG00000003631	ENSDART00000103116	1	6	6	AGAACCAGATGGAGTTTTGTTGTC	6	+	542	2544
ENSDARG00000003631	ENSDART00000103116	1	7	7	GAATTCTGCAGCATTCGTTGCAGCC	7	+	683	2544
ENSDARG00000003631	ENSDART00000103116	1	8	8	CTCGACACAGTCTGGAGTGGAAGTT	7	+	812	2544
ENSDARG00000003631	ENSDART00000103116	1	13	13	TTAAACAACAGTCTGAAGAAGGT	5	+	1216	2544
ENSDARG00000003631	ENSDART00000103116	1	17	17	TGCAGCACCTGAAGGAGCAGCTGGA	7	+	1583	2544
ENSDARG00000003631	ENSDART00000103116	1	17	17	TTCAAAAGCAGCAGGAGGAGCTGAG	7	+	1637	2544
ENSDARG00000003631	ENSDART00000103116	1	17	17	GAACACGCATGATAGAAGCCAAC	5	+	1613	2544
ENSDARG00000003631	ENSDART00000103116	1	17	17	ACATTCAAAAGCAGCAGGAGGAGCT	7	+	1634	2544
ENSDARG00000003631	ENSDART00000103116	1	17	17	CTCAGCACAGCTGAATGCGATGCA	6	+	1563	2544
ENSDARG00000003631	ENSDART00000103116	1	18	18	AGACTCCTCGATCCCTGCAGCAGAA	7	+	1886	2544
ENSDARG00000003631	ENSDART00000103116	1	18	18	GCAGCCGGCTCAGGGTGGTGGGCC	6	+	1713	2544
ENSDARG00000003631	ENSDART00000103116	1	18	18	GCAGCCGGCTCAGGGTGGTGGGC	5	+	1713	2544
ENSDARG00000003631	ENSDART00000103116	1	20	20	TGCCAATGCCAATGTTGTGCAGAT	6	+	1992	2544
ENSDARG00000003631	ENSDART00000103116	1	21	21	GCCCACGTCGATGTTTATGGGTC	5	+	2169	2544
ENSDARG00000003631	ENSDART00000103116	1	21	21	GTTTCCAGCCGGGCAGCAGTTGGT	6	+	2100	2544
ENSDARG00000003631	ENSDART00000103116	1	21	21	CACAACAACAGGGTCAGACGCAGAC	7	+	2219	2544
ENSDARG00000003631	ENSDART00000103116	1	21	21	GACGGCTCCAATGGCGTGTGGCGCA	7	+	2136	2544
ENSDARG00000003631	ENSDART00000103119	1	4	4	GTTTTCGCAGCTGATGCTGGAGGT	6	+	306	2445
ENSDARG00000003631	ENSDART00000103119	1	7	7	AGAACCAGATGGAGTTTTGTTGTC	6	+	539	2445
ENSDARG00000003631	ENSDART00000103119	1	8	8	GAATTCTGCAGCATTCGTTGCAGCC	7	+	680	2445
ENSDARG00000003631	ENSDART00000103119	1	9	9	CTCGACACAGTCTGGAGTGGAAGTT	7	+	809	2445
ENSDARG00000003631	ENSDART00000103119	1	13	13	TTAAACAACAGTCTGAAGAAGGT	5	+	1204	2445
ENSDARG00000003631	ENSDART00000103119	1	16	16	TGCAGCACCTGAAGGAGCAGCTGGA	7	+	1553	2445
ENSDARG00000003631	ENSDART00000103119	1	16	16	TTCAAAAGCAGCAGGAGGAGCTGAG	7	+	1607	2445
ENSDARG00000003631	ENSDART00000103119	1	16	16	GAACACGCATGATAGAAGCCAAC	5	+	1583	2445
ENSDARG00000003631	ENSDART00000103119	1	16	16	ACATTCAAAAGCAGCAGGAGGAGCT	7	+	1604	2445
ENSDARG00000003631	ENSDART00000103119	1	16	16	CTCAGCACAGCTGAATGCGATGCA	6	+	1533	2445
ENSDARG00000003631	ENSDART00000103119	1	17	17	GCAGCCGGCTCAGGGTGGTGGGC	5	+	1668	2445
ENSDARG00000003631	ENSDART00000103119	1	17	17	GCAGCCGGCTCAGGGTGGTGGGCC	6	+	1668	2445
ENSDARG00000003631	ENSDART00000103119	1	17	17	AGACTCCTCGATCCCTGCAGCAGAA	7	+	1841	2445
ENSDARG00000003631	ENSDART00000103119	1	18	18	TGCCAATGCCAATGTTGTGCAGAT	6	+	1929	2445
ENSDARG00000003631	ENSDART00000103119	1	19	19	CACAACAACAGGGTCAGACGCAGAC	7	+	2120	2445
ENSDARG00000003631	ENSDART00000103119	1	19	19	GTTTCCAGCCGGGCAGCAGTTGGT	6	+	2001	2445
ENSDARG00000003631	ENSDART00000103119	1	19	19	GCCCACGTCGATGTTTATGGGTC	5	+	2070	2445
ENSDARG00000003631	ENSDART00000103119	1	19	19	GACGGCTCCAATGGCGTGTGGCGCA	7	+	2037	2445
ENSDARG00000003701	ENSDART00000015547	1	2	1	TGCTTCAGCTACGAGAGGATTGTAA	7	-	447	627
ENSDARG00000003701	ENSDART00000015547	1	2	1	TGCTTCAGCTACGAGAGGATTGT	5	-	449	627
ENSDARG00000003701	ENSDART00000015547	1	2	1	TGCTGCCCCCCAGCAGATGAAGAT	6	-	496	627
ENSDARG00000003701	ENSDART00000015547	1	2	1	TGCCCCCCAGCAGATGAAGATGGC	6	-	493	627
ENSDARG00000003701	ENSDART00000015547	1	2	1	GCAGTCACACGCCATAGAGGGATTG	7	-	83	627
ENSDARG00000003701	ENSDART00000015547	1	2	1	GCAACCAGAGCCTTTGCGGAGTT	5	-	337	627
ENSDARG00000003701	ENSDART00000015547	1	2	1	GAAGGCAACGCCTCCTGTTGTAGCA	7	-	357	627
ENSDARG00000003701	ENSDART00000015547	1	2	1	CCCTTCCCACATCGTCTGTGCAGTC	7	-	129	627
ENSDARG00000003701	ENSDART00000015547	1	2	1	CCCCCCAGCAGATGAAGATGGCTGC	7	-	490	627
ENSDARG00000003701	ENSDART00000015547	1	2	1	CCCCCAGCAGATGAAGATGGCTGC	6	-	490	627
ENSDARG00000003701	ENSDART00000015547	1	2	1	CACTGCTGCCCCCCAGCAGATGAA	6	-	499	627
ENSDARG00000003701	ENSDART00000102187	1	1	1	TGCCCCCCAGCAGATGAAGATGGC	6	-	493	651
ENSDARG00000003701	ENSDART00000102187	1	1	1	TGCTGCCCCCCAGCAGATGAAGAT	6	-	496	651
ENSDARG00000003701	ENSDART00000102187	1	1	1	TGCTTCAGCTACGAGAGGATTGT	5	-	449	651
ENSDARG00000003701	ENSDART00000102187	1	1	1	TGCTTCAGCTACGAGAGGATTGTAA	7	-	447	651
ENSDARG00000003701	ENSDART00000102187	1	1	1	GCAGTCACACGCCATAGAGGGATTG	7	-	83	651
ENSDARG00000003701	ENSDART00000102187	1	1	1	GCAACCAGAGCCTTTGCGGAGTT	5	-	337	651
ENSDARG00000003701	ENSDART00000102187	1	1	1	GAAGGCAACGCCTCCTGTTGTAGCA	7	-	357	651
ENSDARG00000003701	ENSDART00000102187	1	1	1	CCCTTCCCACATCGTCTGTGCAGTC	7	-	129	651
ENSDARG00000003701	ENSDART00000102187	1	1	1	CCCCCCAGCAGATGAAGATGGCTGC	7	-	490	651
ENSDARG00000003701	ENSDART00000102187	1	1	1	CCCCCAGCAGATGAAGATGGCTGC	6	-	490	651
ENSDARG00000003701	ENSDART00000102187	1	1	1	CACTGCTGCCCCCCAGCAGATGAA	6	-	499	651
ENSDARG00000003701	ENSDART00000102188	1	1	1	TGCCCCCCAGCAGATGAAGATGGC	6	-	493	597
ENSDARG00000003701	ENSDART00000102188	1	1	1	TGCTGCCCCCCAGCAGATGAAGAT	6	-	496	597
ENSDARG00000003701	ENSDART00000102188	1	1	1	TGCTTCAGCTACGAGAGGATTGT	5	-	449	597
ENSDARG00000003701	ENSDART00000102188	1	1	1	TGCTTCAGCTACGAGAGGATTGTAA	7	-	447	597
ENSDARG00000003701	ENSDART00000102188	1	1	1	GCAGTCACACGCCATAGAGGGATTG	7	-	83	597
ENSDARG00000003701	ENSDART00000102188	1	1	1	GCAACCAGAGCCTTTGCGGAGTT	5	-	337	597
ENSDARG00000003701	ENSDART00000102188	1	1	1	GAAGGCAACGCCTCCTGTTGTAGCA	7	-	357	597
ENSDARG00000003701	ENSDART00000102188	1	1	1	CCCTTCCCACATCGTCTGTGCAGTC	7	-	129	597
ENSDARG00000003701	ENSDART00000102188	1	1	1	CCCCCCAGCAGATGAAGATGGCTGC	7	-	490	597
ENSDARG00000003701	ENSDART00000102188	1	1	1	CCCCCAGCAGATGAAGATGGCTGC	6	-	490	597
ENSDARG00000003701	ENSDART00000102188	1	1	1	CACTGCTGCCCCCCAGCAGATGAA	6	-	499	597
ENSDARG00000003783	ENSDART00000023180	1	1	1	TCCATCGCAATGGATGCGACTGT	5	+	1	1002
ENSDARG00000003783	ENSDART00000023180	1	3	3	GACAACCACCATGGTGGCGTTTGC	6	+	442	1002
ENSDARG00000003783	ENSDART00000023180	1	3	3	CACCTCTAACAGCACTTTTGAAGGA	7	+	414	1002
ENSDARG00000003783	ENSDART00000023180	1	3	3	AGCAAATCCATGAAGCTGGTTTT	5	+	469	1002
ENSDARG00000003783	ENSDART00000023180	1	3	3	ACAACCACCATGGTGGCGTTTGCA	6	+	443	1002
ENSDARG00000003783	ENSDART00000023180	1	3	3	ACAACCACCATGGTGGCGTTTGC	5	+	443	1002
ENSDARG00000003783	ENSDART00000023180	1	3	3	GACAACCACCATGGTGGCGTTTGCA	7	+	442	1002
ENSDARG00000003783	ENSDART00000023180	1	5	5	GTCATCAGAAGCACTCGGCGCAGTG	7	+	764	1002
ENSDARG00000003783	ENSDART00000023180	1	5	5	GCAGGCGTCGCATCCGGGGCTGTG	6	+	694	1002
ENSDARG00000003783	ENSDART00000023180	1	5	5	CGCTGCCCAAACGTGGCAGTGGCG	6	+	812	1002
ENSDARG00000003783	ENSDART00000023180	1	5	5	ACACGCTGCCCAAACGTGGCAGTG	6	+	809	1002
ENSDARG00000003783	ENSDART00000085203	1	1	1	TCCATCGCAATGGATGCGACTGT	5	+	7	1032
ENSDARG00000003783	ENSDART00000085203	1	3	3	GACAACCACCATGGTGGCGTTTGCA	7	+	448	1032
ENSDARG00000003783	ENSDART00000085203	1	3	3	GACAACCACCATGGTGGCGTTTGC	6	+	448	1032
ENSDARG00000003783	ENSDART00000085203	1	3	3	CACCTCTAACAGCACTTTTGAAGGA	7	+	420	1032
ENSDARG00000003783	ENSDART00000085203	1	3	3	AGCAAATCCATGAAGCTGGTTTT	5	+	475	1032
ENSDARG00000003783	ENSDART00000085203	1	3	3	ACAACCACCATGGTGGCGTTTGCA	6	+	449	1032
ENSDARG00000003783	ENSDART00000085203	1	3	3	ACAACCACCATGGTGGCGTTTGC	5	+	449	1032
ENSDARG00000003783	ENSDART00000085203	1	6	6	CGCTGCCCAAACGTGGCAGTGGCG	6	+	842	1032
ENSDARG00000003783	ENSDART00000085203	1	6	6	ACACGCTGCCCAAACGTGGCAGTG	6	+	839	1032
ENSDARG00000003783	ENSDART00000085203	1	6	6	GCAGGCGTCGCATCCGGGGCTGTG	6	+	724	1032
ENSDARG00000003783	ENSDART00000085203	1	6	6	GTCATCAGAAGCACTCGGCGCAGTG	7	+	794	1032
ENSDARG00000003866	ENSDART00000019743	1	4	4	TACAAAACACAAGATGCAGGTGAT	6	+	376	1974
ENSDARG00000003866	ENSDART00000019743	1	4	4	TTACAAAACACAAGATGCAGGTGAT	7	+	375	1974
ENSDARG00000003866	ENSDART00000019743	1	4	4	ACAAAACACAAGATGCAGGTGAT	5	+	377	1974
ENSDARG00000003866	ENSDART00000019743	1	9	9	ACAACCAGATGGACTCTGTGGTGAG	7	+	992	1974
ENSDARG00000003866	ENSDART00000019743	1	9	9	ACAACCAGATGGACTCTGTGGTG	5	+	992	1974
ENSDARG00000003866	ENSDART00000019743	1	11	11	TACTCCAGCTGGTTATGTGGCTGCT	7	+	1227	1974
ENSDARG00000003866	ENSDART00000019743	1	11	11	TACTCCAGCTGGTTATGTGGCTGC	6	+	1227	1974
ENSDARG00000003866	ENSDART00000019743	1	13	13	GTTTGCAGATTTCTTTGTGATGAA	6	+	1329	1974
ENSDARG00000003866	ENSDART00000019743	1	13	13	GTTGCCATCCTGGCTCTGTGGTTTT	7	+	1405	1974
ENSDARG00000003866	ENSDART00000019743	1	13	13	GTTGCCATCCTGGCTCTGTGGTT	5	+	1405	1974
ENSDARG00000003866	ENSDART00000019743	1	13	13	CCCCTCACCTTTATCGGCGCGTAC	6	+	1441	1974
ENSDARG00000003866	ENSDART00000019743	1	14	14	GAATCCTGCCATTCGGATGCATCT	6	+	1577	1974
ENSDARG00000003866	ENSDART00000019743	1	14	14	TGCATCTTCATCCAGCTGTTTTT	5	+	1594	1974
ENSDARG00000003866	ENSDART00000019743	1	15	15	TGCTACTTCCACCTGTGTGCTGAG	6	+	1723	1974
ENSDARG00000003866	ENSDART00000019743	1	15	15	TACTTCCACCTGTGTGCTGAGGTG	6	+	1726	1974
ENSDARG00000003866	ENSDART00000019743	1	15	15	TACTTCCACCTGTGTGCTGAGGT	5	+	1726	1974
ENSDARG00000003866	ENSDART00000019743	1	16	16	GCACCATTCTTTACTTTGGTTAC	5	+	1859	1974
ENSDARG00000003866	ENSDART00000019743	1	16	16	TTCTTCCTCTTCACAGGTTTGTGT	6	+	1903	1974
ENSDARG00000004246	ENSDART00000007531	1	2	2	TCCTGCAGCGGGACAGCGGTGGAC	6	+	106	3705
ENSDARG00000004246	ENSDART00000007531	1	2	2	TGCCACGGCCAGAGTCTGCGGAG	5	+	130	3705
ENSDARG00000004246	ENSDART00000007531	1	2	2	TGCCACGGCCAGAGTCTGCGGAGCG	7	+	130	3705
ENSDARG00000004246	ENSDART00000007531	1	2	2	AGAGTCTGCGGAGCGTGCCGCGGAA	7	+	140	3705
ENSDARG00000004246	ENSDART00000007531	1	9	9	GGCTCCACCCTCCCTTAGGGGCC	5	+	720	3705
ENSDARG00000004246	ENSDART00000007531	1	10	10	CACTCATCCTGTAGTGTGCTGCA	5	+	796	3705
ENSDARG00000004246	ENSDART00000007531	1	10	10	ACACTCATCCTGTAGTGTGCTGCA	6	+	795	3705
ENSDARG00000004246	ENSDART00000007531	1	11	11	AGCGACTCCGAAGAATGTGAGTGT	6	+	974	3705
ENSDARG00000004246	ENSDART00000007531	1	17	17	CGCTCAAAACTAGGTGGGGATTG	5	+	1480	3705
ENSDARG00000004246	ENSDART00000007531	1	17	17	GTATACAGCAGAACTGTGAGTGT	5	+	1602	3705
ENSDARG00000004246	ENSDART00000007531	1	17	17	CGCTCAAAACTAGGTGGGGATTGC	6	+	1480	3705
ENSDARG00000004246	ENSDART00000007531	1	18	18	GAATTCACAGTGCTGGAGGCTAC	5	+	1633	3705
ENSDARG00000004246	ENSDART00000007531	1	21	21	TCCCTATTCAAGATGTAGCTGTA	5	+	2102	3705
ENSDARG00000004246	ENSDART00000007531	1	21	21	GTACAAGACTTTGCCTGTGAAGAA	6	+	2122	3705
ENSDARG00000004246	ENSDART00000007531	1	25	25	TTAAGCTACAACAGATTAAGGTGTA	7	+	2425	3705
ENSDARG00000004246	ENSDART00000007531	1	25	25	AGCTACAACAGATTAAGGTGTATTC	7	+	2428	3705
ENSDARG00000004246	ENSDART00000007531	1	25	25	GACGGCCTCAAGTCTCTGCGCTTGT	7	+	2467	3705
ENSDARG00000004246	ENSDART00000007531	1	27	27	CAAACCCCCTGTACTGTGACTGT	5	+	2576	3705
ENSDARG00000004246	ENSDART00000007531	1	27	27	CGCAAACCCCCTGTACTGTGACTGT	7	+	2574	3705
ENSDARG00000004246	ENSDART00000007531	1	27	27	GCAAACCCCCTGTACTGTGACTGT	6	+	2575	3705
ENSDARG00000004246	ENSDART00000007531	1	28	28	GTAACCATCCTGTAGATTTTTAC	5	+	2804	3705
ENSDARG00000004246	ENSDART00000007531	1	28	28	AGATGCACCTGCCCGTATGGTTT	5	+	2827	3705
ENSDARG00000004246	ENSDART00000007531	1	31	31	GACTCCAAATGTATTCTGACTGC	5	+	3151	3705
ENSDARG00000004246	ENSDART00000102577	1	1	1	TCCTGCAGCGGGACAGCGGTGGAC	6	+	85	3132
ENSDARG00000004246	ENSDART00000102577	1	1	1	TGCCACGGCCAGAGTCTGCGGAG	5	+	109	3132
ENSDARG00000004246	ENSDART00000102577	1	1	1	TGCCACGGCCAGAGTCTGCGGAGCG	7	+	109	3132
ENSDARG00000004246	ENSDART00000102577	1	1	1	AGAGTCTGCGGAGCGTGCCGCGGAA	7	+	119	3132
ENSDARG00000004246	ENSDART00000102577	1	8	8	GGCTCCACCCTCCCTTAGGGGCC	5	+	699	3132
ENSDARG00000004246	ENSDART00000102577	1	9	9	CACTCATCCTGTAGTGTGCTGCA	5	+	775	3132
ENSDARG00000004246	ENSDART00000102577	1	9	9	ACACTCATCCTGTAGTGTGCTGCA	6	+	774	3132
ENSDARG00000004246	ENSDART00000102577	1	10	10	AGCGACTCCGAAGAATGTGAGTGT	6	+	953	3132
ENSDARG00000004246	ENSDART00000102577	1	15	15	GTATACAGCAGAACTGTGAGTGT	5	+	1557	3132
ENSDARG00000004246	ENSDART00000102577	1	15	15	CGCTCAAAACTAGGTGGGGATTGC	6	+	1435	3132
ENSDARG00000004246	ENSDART00000102577	1	15	15	CGCTCAAAACTAGGTGGGGATTG	5	+	1435	3132
ENSDARG00000004246	ENSDART00000102577	1	16	16	GAATTCACAGTGCTGGAGGCTAC	5	+	1588	3132
ENSDARG00000004246	ENSDART00000102577	1	19	19	TCCCTATTCAAGATGTAGCTGTA	5	+	2057	3132
ENSDARG00000004246	ENSDART00000102577	1	19	19	GTACAAGACTTTGCCTGTGAAGAA	6	+	2077	3132
ENSDARG00000004246	ENSDART00000102577	1	23	23	GACGGCCTCAAGTCTCTGCGCTTGT	7	+	2422	3132
ENSDARG00000004246	ENSDART00000102577	1	23	23	TTAAGCTACAACAGATTAAGGTGTA	7	+	2380	3132
ENSDARG00000004246	ENSDART00000102577	1	23	23	AGCTACAACAGATTAAGGTGTATTC	7	+	2383	3132
ENSDARG00000004246	ENSDART00000102577	1	25	25	GCAAACCCCCTGTACTGTGACTGT	6	+	2530	3132
ENSDARG00000004246	ENSDART00000102577	1	25	25	CGCAAACCCCCTGTACTGTGACTGT	7	+	2529	3132
ENSDARG00000004246	ENSDART00000102577	1	25	25	CAAACCCCCTGTACTGTGACTGT	5	+	2531	3132
ENSDARG00000004246	ENSDART00000102577	1	26	26	GTAACCATCCTGTAGATTTTTAC	5	+	2759	3132
ENSDARG00000004246	ENSDART00000102577	1	26	26	AGATGCACCTGCCCGTATGGTTT	5	+	2782	3132
ENSDARG00000004246	ENSDART00000102577	1	29	29	GACTCCAAATGTATTCTGACTGC	5	+	3106	3132
ENSDARG00000004246	ENSDART00000102578	1	2	2	TGCCACGGCCAGAGTCTGCGGAG	5	+	133	3708
ENSDARG00000004246	ENSDART00000102578	1	2	2	AGAGTCTGCGGAGCGTGCCGCGGAA	7	+	143	3708
ENSDARG00000004246	ENSDART00000102578	1	2	2	TGCCACGGCCAGAGTCTGCGGAGCG	7	+	133	3708
ENSDARG00000004246	ENSDART00000102578	1	2	2	TCCTGCAGCGGGACAGCGGTGGAC	6	+	109	3708
ENSDARG00000004246	ENSDART00000102578	1	9	9	GGCTCCACCCTCCCTTAGGGGCC	5	+	723	3708
ENSDARG00000004246	ENSDART00000102578	1	10	10	CACTCATCCTGTAGTGTGCTGCA	5	+	799	3708
ENSDARG00000004246	ENSDART00000102578	1	10	10	ACACTCATCCTGTAGTGTGCTGCA	6	+	798	3708
ENSDARG00000004246	ENSDART00000102578	1	11	11	AGCGACTCCGAAGAATGTGAGTGT	6	+	977	3708
ENSDARG00000004246	ENSDART00000102578	1	17	17	GTATACAGCAGAACTGTGAGTGT	5	+	1605	3708
ENSDARG00000004246	ENSDART00000102578	1	17	17	CGCTCAAAACTAGGTGGGGATTGC	6	+	1483	3708
ENSDARG00000004246	ENSDART00000102578	1	17	17	CGCTCAAAACTAGGTGGGGATTG	5	+	1483	3708
ENSDARG00000004246	ENSDART00000102578	1	18	18	GAATTCACAGTGCTGGAGGCTAC	5	+	1636	3708
ENSDARG00000004246	ENSDART00000102578	1	21	21	TCCCTATTCAAGATGTAGCTGTA	5	+	2105	3708
ENSDARG00000004246	ENSDART00000102578	1	21	21	GTACAAGACTTTGCCTGTGAAGAA	6	+	2125	3708
ENSDARG00000004246	ENSDART00000102578	1	25	25	GACGGCCTCAAGTCTCTGCGCTTGT	7	+	2470	3708
ENSDARG00000004246	ENSDART00000102578	1	25	25	TTAAGCTACAACAGATTAAGGTGTA	7	+	2428	3708
ENSDARG00000004246	ENSDART00000102578	1	25	25	AGCTACAACAGATTAAGGTGTATTC	7	+	2431	3708
ENSDARG00000004246	ENSDART00000102578	1	27	27	CAAACCCCCTGTACTGTGACTGT	5	+	2579	3708
ENSDARG00000004246	ENSDART00000102578	1	27	27	GCAAACCCCCTGTACTGTGACTGT	6	+	2578	3708
ENSDARG00000004246	ENSDART00000102578	1	27	27	CGCAAACCCCCTGTACTGTGACTGT	7	+	2577	3708
ENSDARG00000004246	ENSDART00000102578	1	28	28	GTAACCATCCTGTAGATTTTTAC	5	+	2807	3708
ENSDARG00000004246	ENSDART00000102578	1	28	28	AGATGCACCTGCCCGTATGGTTT	5	+	2830	3708
ENSDARG00000004246	ENSDART00000102578	1	31	31	GACTCCAAATGTATTCTGACTGC	5	+	3154	3708
ENSDARG00000004427	ENSDART00000024743	1	4	3	TTCTCCTGCAGGGCTTGTCGGTTCT	7	+	188	231
ENSDARG00000004621	ENSDART00000012688	1	1	1	GACATCAAAGTAGGTCTGCAGGA	5	-	146	750
ENSDARG00000004621	ENSDART00000012688	1	1	1	CACTCAGACATTTGAGGCAGCATTC	7	-	22	750
ENSDARG00000004621	ENSDART00000012688	1	1	1	AACACCGGCGTACAGCAGGATAG	5	-	74	750
ENSDARG00000004621	ENSDART00000012688	1	3	3	ACCGGCAGAGAGGTGAAGGCTGT	5	-	409	750
ENSDARG00000004621	ENSDART00000012688	1	3	3	CTACGCACCGTACTGACGCAGGT	5	-	524	750
ENSDARG00000004621	ENSDART00000012688	1	3	3	GTCAAAGCAAAGGTTGGCGCTGTT	6	-	502	750
ENSDARG00000004621	ENSDART00000040280	1	2	2	GACATCAAAGTAGGTCTGCAGGA	5	-	146	822
ENSDARG00000004621	ENSDART00000040280	1	2	2	CACTCAGACATTTGAGGCAGCATTC	7	-	22	822
ENSDARG00000004621	ENSDART00000040280	1	2	2	AACACCGGCGTACAGCAGGATAG	5	-	74	822
ENSDARG00000004621	ENSDART00000040280	1	4	4	ACCGGCAGAGAGGTGAAGGCTGT	5	-	409	822
ENSDARG00000004621	ENSDART00000040280	1	4	4	CTACGCACCGTACTGACGCAGGT	5	-	524	822
ENSDARG00000004621	ENSDART00000040280	1	4	4	GTCAAAGCAAAGGTTGGCGCTGTT	6	-	502	822
ENSDARG00000004621	ENSDART00000048172	1	1	1	ACACAATACCTTTCTGCGTCTGT	5	-	33	855
ENSDARG00000004621	ENSDART00000048172	1	2	2	AACACCGGCGTACAGCAGGATAG	5	-	107	855
ENSDARG00000004621	ENSDART00000048172	1	2	2	CACTCAGACATTTGAGGCAGCATTC	7	-	55	855
ENSDARG00000004621	ENSDART00000048172	1	2	2	GACATCAAAGTAGGTCTGCAGGA	5	-	179	855
ENSDARG00000004621	ENSDART00000048172	1	4	4	GTCAAAGCAAAGGTTGGCGCTGTT	6	-	535	855
ENSDARG00000004621	ENSDART00000048172	1	4	4	CTACGCACCGTACTGACGCAGGT	5	-	557	855
ENSDARG00000004621	ENSDART00000048172	1	4	4	ACCGGCAGAGAGGTGAAGGCTGT	5	-	442	855
ENSDARG00000004633	ENSDART00000006023	1	1	1	GACGACCTCGGCTCTGCGGCGGCA	6	+	12	1746
ENSDARG00000004633	ENSDART00000006023	1	1	1	GACGACCTCGGCTCTGCGGCGGC	5	+	12	1746
ENSDARG00000004633	ENSDART00000006023	1	1	1	GACCTCGGCTCTGCGGCGGCAGGT	6	+	15	1746
ENSDARG00000004633	ENSDART00000006023	1	1	1	CTCACCTTCAGCGTGGTGGCCTTC	6	+	145	1746
ENSDARG00000004633	ENSDART00000006023	1	2	2	GACCAAAGAGAGGATGATGGCGGC	6	+	456	1746
ENSDARG00000004633	ENSDART00000006023	1	2	2	CCCGTCATCCTTCAACTGTGAGTCT	7	+	570	1746
ENSDARG00000004633	ENSDART00000006023	1	2	2	CACTCAAGACCAAAGAGAGGATGAT	7	+	449	1746
ENSDARG00000004633	ENSDART00000006023	1	2	2	GGCCAAGACGGGATCGGAGCGTGT	6	+	261	1746
ENSDARG00000004633	ENSDART00000006023	1	3	3	GGCCGCAGACGAGTGGAGAAGAA	5	+	629	1746
ENSDARG00000004633	ENSDART00000006023	1	7	7	CACCAACCAACCCCTGGGATGCC	5	+	1019	1746
ENSDARG00000004633	ENSDART00000006023	1	7	7	AAAGTCTAATAACCCAGTGGCTGGG	7	+	933	1746
ENSDARG00000004633	ENSDART00000006023	1	7	7	ATCACCAACCAACCCCTGGGATGCC	7	+	1017	1746
ENSDARG00000004633	ENSDART00000006023	1	9	9	GGCTTCCACTGGAGAGGGAGGGGCC	7	+	1142	1746
ENSDARG00000004633	ENSDART00000006023	1	11	11	GCCTCACCACGGCTTGCTGGAGCT	6	+	1635	1746
ENSDARG00000004633	ENSDART00000006023	1	11	11	GCAACCTGCCCCAGCCGCTGCTGCC	7	+	1664	1746
ENSDARG00000004633	ENSDART00000006023	1	11	11	AGCCTCACCACGGCTTGCTGGAGCT	7	+	1634	1746
ENSDARG00000004633	ENSDART00000006023	1	11	11	TACAGCGCATCTCTGCCGCTGCC	5	+	1567	1746
ENSDARG00000004633	ENSDART00000006023	1	11	11	TCCTACAGCGCATCTCTGCCGCT	5	+	1564	1746
ENSDARG00000004633	ENSDART00000027577	1	1	1	GACGACCTCGGCTCTGCGGCGGCA	6	+	12	1632
ENSDARG00000004633	ENSDART00000027577	1	1	1	GACGACCTCGGCTCTGCGGCGGC	5	+	12	1632
ENSDARG00000004633	ENSDART00000027577	1	1	1	GACCTCGGCTCTGCGGCGGCAGGT	6	+	15	1632
ENSDARG00000004633	ENSDART00000027577	1	1	1	CTCACCTTCAGCGTGGTGGCCTTC	6	+	145	1632
ENSDARG00000004633	ENSDART00000027577	1	2	2	CACTCAAGACCAAAGAGAGGATGAT	7	+	449	1632
ENSDARG00000004633	ENSDART00000027577	1	2	2	GACCAAAGAGAGGATGATGGCGGC	6	+	456	1632
ENSDARG00000004633	ENSDART00000027577	1	2	2	CCCGTCATCCTTCAACTGTGAGTCT	7	+	570	1632
ENSDARG00000004633	ENSDART00000027577	1	2	2	GGCCAAGACGGGATCGGAGCGTGT	6	+	261	1632
ENSDARG00000004633	ENSDART00000027577	1	3	3	GGCCGCAGACGAGTGGAGAAGAA	5	+	629	1632
ENSDARG00000004633	ENSDART00000027577	1	7	7	CACCAACCAACCCCTGGGATGCC	5	+	1013	1632
ENSDARG00000004633	ENSDART00000027577	1	7	7	ATCACCAACCAACCCCTGGGATGCC	7	+	1011	1632
ENSDARG00000004633	ENSDART00000027577	1	7	7	AAAGTCTAATAACCCAGTGGCTGGG	7	+	927	1632
ENSDARG00000004633	ENSDART00000027577	1	10	10	TCCTACAGCGCATCTCTGCCGCT	5	+	1498	1632
ENSDARG00000004633	ENSDART00000027577	1	10	10	TACAGCGCATCTCTGCCGCTGCC	5	+	1501	1632
ENSDARG00000004633	ENSDART00000027577	1	10	10	GCCTCACCACGGCTTGCTGGAGCT	6	+	1569	1632
ENSDARG00000004633	ENSDART00000027577	1	10	10	GCAACCTGCCCCAGCCGCTGCTGCC	7	+	1598	1632
ENSDARG00000004633	ENSDART00000027577	1	10	10	AGCCTCACCACGGCTTGCTGGAGCT	7	+	1568	1632
ENSDARG00000004633	ENSDART00000062841	1	1	1	GACGACCTCGGCTCTGCGGCGGCA	6	+	12	1458
ENSDARG00000004633	ENSDART00000062841	1	1	1	GACGACCTCGGCTCTGCGGCGGC	5	+	12	1458
ENSDARG00000004633	ENSDART00000062841	1	1	1	GACCTCGGCTCTGCGGCGGCAGGT	6	+	15	1458
ENSDARG00000004633	ENSDART00000062841	1	1	1	CTCACCTTCAGCGTGGTGGCCTTC	6	+	145	1458
ENSDARG00000004633	ENSDART00000062841	1	2	2	CCCGTCATCCTTCAACTGTGAGTCT	7	+	570	1458
ENSDARG00000004633	ENSDART00000062841	1	2	2	CACTCAAGACCAAAGAGAGGATGAT	7	+	449	1458
ENSDARG00000004633	ENSDART00000062841	1	2	2	GACCAAAGAGAGGATGATGGCGGC	6	+	456	1458
ENSDARG00000004633	ENSDART00000062841	1	2	2	GGCCAAGACGGGATCGGAGCGTGT	6	+	261	1458
ENSDARG00000004633	ENSDART00000062841	1	3	3	GGCCGCAGACGAGTGGAGAAGAA	5	+	629	1458
ENSDARG00000004633	ENSDART00000062841	1	8	8	AAAGTCTAATAACCCAGTGGCTGGG	7	+	954	1458
ENSDARG00000004633	ENSDART00000062841	1	8	8	ATCACCAACCAACCCCTGGGATGCC	7	+	1038	1458
ENSDARG00000004633	ENSDART00000062841	1	8	8	CACCAACCAACCCCTGGGATGCC	5	+	1040	1458
ENSDARG00000004633	ENSDART00000063757	1	1	1	GACGACCTCGGCTCTGCGGCGGCA	6	+	12	1482
ENSDARG00000004633	ENSDART00000063757	1	1	1	GACGACCTCGGCTCTGCGGCGGC	5	+	12	1482
ENSDARG00000004633	ENSDART00000063757	1	1	1	GACCTCGGCTCTGCGGCGGCAGGT	6	+	15	1482
ENSDARG00000004633	ENSDART00000063757	1	1	1	CTCACCTTCAGCGTGGTGGCCTTC	6	+	145	1482
ENSDARG00000004633	ENSDART00000063757	1	2	2	GGCCAAGACGGGATCGGAGCGTGT	6	+	261	1482
ENSDARG00000004633	ENSDART00000063757	1	2	2	GACCAAAGAGAGGATGATGGCGGC	6	+	456	1482
ENSDARG00000004633	ENSDART00000063757	1	2	2	CCCGTCATCCTTCAACTGTGAGTCT	7	+	570	1482
ENSDARG00000004633	ENSDART00000063757	1	2	2	CACTCAAGACCAAAGAGAGGATGAT	7	+	449	1482
ENSDARG00000004633	ENSDART00000063757	1	3	3	GGCCGCAGACGAGTGGAGAAGAA	5	+	629	1482
ENSDARG00000004633	ENSDART00000063757	1	6	6	CACCAACCAACCCCTGGGATGCC	5	+	983	1482
ENSDARG00000004633	ENSDART00000063757	1	6	6	ATCACCAACCAACCCCTGGGATGCC	7	+	981	1482
ENSDARG00000004633	ENSDART00000063757	1	6	6	AAAGTCTAATAACCCAGTGGCTGGG	7	+	897	1482
ENSDARG00000004633	ENSDART00000063761	1	1	1	CTCACCTTCAGCGTGGTGGCCTTC	6	+	145	1404
ENSDARG00000004633	ENSDART00000063761	1	1	1	GACGACCTCGGCTCTGCGGCGGC	5	+	12	1404
ENSDARG00000004633	ENSDART00000063761	1	1	1	GACGACCTCGGCTCTGCGGCGGCA	6	+	12	1404
ENSDARG00000004633	ENSDART00000063761	1	1	1	GACCTCGGCTCTGCGGCGGCAGGT	6	+	15	1404
ENSDARG00000004633	ENSDART00000063761	1	2	2	CACTCAAGACCAAAGAGAGGATGAT	7	+	449	1404
ENSDARG00000004633	ENSDART00000063761	1	2	2	CCCGTCATCCTTCAACTGTGAGTCT	7	+	570	1404
ENSDARG00000004633	ENSDART00000063761	1	2	2	GGCCAAGACGGGATCGGAGCGTGT	6	+	261	1404
ENSDARG00000004633	ENSDART00000063761	1	2	2	GACCAAAGAGAGGATGATGGCGGC	6	+	456	1404
ENSDARG00000004633	ENSDART00000063761	1	3	3	GGCCGCAGACGAGTGGAGAAGAA	5	+	629	1404
ENSDARG00000004633	ENSDART00000063761	1	9	9	CACCAACCAACCCCTGGGATGCC	5	+	1037	1404
ENSDARG00000004633	ENSDART00000063761	1	9	9	ATCACCAACCAACCCCTGGGATGCC	7	+	1035	1404
ENSDARG00000004633	ENSDART00000063761	1	9	9	AAAGTCTAATAACCCAGTGGCTGGG	7	+	951	1404
ENSDARG00000004633	ENSDART00000063761	1	10	10	TTCAACTCCATTTTTCGATTTTGAG	7	+	1131	1404
ENSDARG00000004633	ENSDART00000063763	1	1	1	GACGACCTCGGCTCTGCGGCGGCA	6	+	12	1458
ENSDARG00000004633	ENSDART00000063763	1	1	1	GACGACCTCGGCTCTGCGGCGGC	5	+	12	1458
ENSDARG00000004633	ENSDART00000063763	1	1	1	GACCTCGGCTCTGCGGCGGCAGGT	6	+	15	1458
ENSDARG00000004633	ENSDART00000063763	1	1	1	CTCACCTTCAGCGTGGTGGCCTTC	6	+	145	1458
ENSDARG00000004633	ENSDART00000063763	1	2	2	CCCGTCATCCTTCAACTGTGAGTCT	7	+	570	1458
ENSDARG00000004633	ENSDART00000063763	1	2	2	CACTCAAGACCAAAGAGAGGATGAT	7	+	449	1458
ENSDARG00000004633	ENSDART00000063763	1	2	2	GACCAAAGAGAGGATGATGGCGGC	6	+	456	1458
ENSDARG00000004633	ENSDART00000063763	1	2	2	GGCCAAGACGGGATCGGAGCGTGT	6	+	261	1458
ENSDARG00000004633	ENSDART00000063763	1	3	3	GGCCGCAGACGAGTGGAGAAGAA	5	+	629	1458
ENSDARG00000004633	ENSDART00000063763	1	8	8	AAAGTCTAATAACCCAGTGGCTGGG	7	+	954	1458
ENSDARG00000004633	ENSDART00000063763	1	8	8	ATCACCAACCAACCCCTGGGATGCC	7	+	1038	1458
ENSDARG00000004633	ENSDART00000063763	1	8	8	CACCAACCAACCCCTGGGATGCC	5	+	1040	1458
ENSDARG00000004633	ENSDART00000063770	1	1	1	CTCACCTTCAGCGTGGTGGCCTTC	6	+	145	1746
ENSDARG00000004633	ENSDART00000063770	1	1	1	GACGACCTCGGCTCTGCGGCGGC	5	+	12	1746
ENSDARG00000004633	ENSDART00000063770	1	1	1	GACGACCTCGGCTCTGCGGCGGCA	6	+	12	1746
ENSDARG00000004633	ENSDART00000063770	1	1	1	GACCTCGGCTCTGCGGCGGCAGGT	6	+	15	1746
ENSDARG00000004633	ENSDART00000063770	1	2	2	GGCCAAGACGGGATCGGAGCGTGT	6	+	261	1746
ENSDARG00000004633	ENSDART00000063770	1	2	2	CACTCAAGACCAAAGAGAGGATGAT	7	+	449	1746
ENSDARG00000004633	ENSDART00000063770	1	2	2	CCCGTCATCCTTCAACTGTGAGTCT	7	+	570	1746
ENSDARG00000004633	ENSDART00000063770	1	2	2	GACCAAAGAGAGGATGATGGCGGC	6	+	456	1746
ENSDARG00000004633	ENSDART00000063770	1	3	3	GGCCGCAGACGAGTGGAGAAGAA	5	+	629	1746
ENSDARG00000004633	ENSDART00000063770	1	7	7	CACCAACCAACCCCTGGGATGCC	5	+	1019	1746
ENSDARG00000004633	ENSDART00000063770	1	7	7	ATCACCAACCAACCCCTGGGATGCC	7	+	1017	1746
ENSDARG00000004633	ENSDART00000063770	1	7	7	AAAGTCTAATAACCCAGTGGCTGGG	7	+	933	1746
ENSDARG00000004633	ENSDART00000063770	1	8	8	GGCTTCCACTGGAGAGGGAGGGGCC	7	+	1163	1746
ENSDARG00000004633	ENSDART00000063770	1	10	10	AGCCTCACCACGGCTTGCTGGAGCT	7	+	1634	1746
ENSDARG00000004633	ENSDART00000063770	1	10	10	GCCTCACCACGGCTTGCTGGAGCT	6	+	1635	1746
ENSDARG00000004633	ENSDART00000063770	1	10	10	GCAACCTGCCCCAGCCGCTGCTGCC	7	+	1664	1746
ENSDARG00000004633	ENSDART00000063770	1	10	10	TACAGCGCATCTCTGCCGCTGCC	5	+	1567	1746
ENSDARG00000004633	ENSDART00000063770	1	10	10	TCCTACAGCGCATCTCTGCCGCT	5	+	1564	1746
ENSDARG00000004634	ENSDART00000031301	1	3	3	TGCTGCCCAATGTGCGGAGCGTTG	6	-	446	2253
ENSDARG00000004634	ENSDART00000031301	1	3	3	TCCTCCACCCTGACCCGCCGCAGGA	7	-	399	2253
ENSDARG00000004634	ENSDART00000031301	1	9	9	CTCCCAGCAGCGGGTTGAAGGGTTT	7	-	1306	2253
ENSDARG00000004634	ENSDART00000031301	1	9	9	CCCAGCAGCGGGTTGAAGGGTTT	5	-	1306	2253
ENSDARG00000004634	ENSDART00000031301	1	10	10	GGCAGCAGCTGGAGGATGATGGC	5	-	1391	2253
ENSDARG00000004634	ENSDART00000031301	1	12	12	GGCCACGTCTCTGGAGAAGTAGCT	6	-	1678	2253
ENSDARG00000004634	ENSDART00000031301	1	13	13	CTCCACAGCTCTTTGGCTTTGAG	5	-	1858	2253
ENSDARG00000004634	ENSDART00000031301	1	13	13	TTCCTCCACAGCTCTTTGGCTTT	5	-	1861	2253
ENSDARG00000004634	ENSDART00000031301	1	13	13	TCCTCCACAGCTCTTTGGCTTTGAG	7	-	1858	2253
ENSDARG00000004634	ENSDART00000031301	1	13	13	GTCTTCCTCCACAGCTCTTTGGCT	6	-	1863	2253
ENSDARG00000004634	ENSDART00000031301	1	14	14	AGCGCCAGCGTTGAGAAGTAGTA	5	-	1915	2253
ENSDARG00000004634	ENSDART00000031301	1	14	14	ACCCTCCTCAGGGTTGGCGGAGCG	6	-	2101	2253
ENSDARG00000004634	ENSDART00000031301	1	14	14	TTACCCTCCTCAGGGTTGGCGGA	5	-	2104	2253
ENSDARG00000004953	ENSDART00000012627	1	4	4	CACCACAGAAGCATTGCAGATGGC	6	+	297	1596
ENSDARG00000004953	ENSDART00000012627	1	4	4	GACATCGCCACCACAGAAGCATTG	6	+	289	1596
ENSDARG00000004953	ENSDART00000012627	1	5	5	AAAGGCTACATGATTGTAAGGTGCA	7	+	442	1596
ENSDARG00000004953	ENSDART00000012627	1	6	6	AGAAACTAACAATTGAGTTGGTT	5	+	599	1596
ENSDARG00000004953	ENSDART00000012627	1	8	8	ATCCGCATCAGAACTGCTGATTTT	6	+	813	1596
ENSDARG00000004953	ENSDART00000012627	1	11	11	CAATCATGCTACTTTGAGTGAGAT	6	+	1332	1596
ENSDARG00000004953	ENSDART00000012627	1	11	11	CTCAAAAGAAAAGCGGGAAGAGGAC	7	+	1257	1596
ENSDARG00000004953	ENSDART00000012627	1	11	11	GAAGACACAGAAAACTTTGACTGC	6	+	1285	1596
ENSDARG00000004953	ENSDART00000012627	1	12	12	TGCTGCTGCAAGAAGCCGCTTTG	5	+	1433	1596
ENSDARG00000004953	ENSDART00000012627	1	12	12	ATCTGCTGCTGCAAGAAGCCGCT	5	+	1430	1596
ENSDARG00000004953	ENSDART00000012627	1	12	12	ACATGCTTAAAGAGGATTTTGAC	5	+	1508	1596
ENSDARG00000005072	ENSDART00000079033	1	1	1	ATCCTCACCGAAGACTTTGAAGGC	6	-	436	1524
ENSDARG00000005072	ENSDART00000079033	1	2	2	TACCTCCTCCTCTTCTTTGTCTGC	6	-	460	1524
ENSDARG00000005072	ENSDART00000079033	1	2	2	GCACAAAACTCTCATTGTTGCCTCT	7	-	810	1524
ENSDARG00000005072	ENSDART00000079033	1	2	2	ACAAAACTCTCATTGTTGCCTCT	5	-	810	1524
ENSDARG00000005072	ENSDART00000079033	1	2	2	ACCTCCTCCTCTTCTTTGTCTGC	5	-	460	1524
ENSDARG00000005072	ENSDART00000079033	1	2	2	CTCCTCCTCTTCTTTGTCTGCTTCT	7	-	456	1524
ENSDARG00000005072	ENSDART00000079033	1	2	2	ATCTTCCACAGTTTCAGCTGCTGTT	7	-	690	1524
ENSDARG00000005072	ENSDART00000079033	1	3	3	AGCAGCGGCCACCAGCTCTGGGTCT	7	-	1089	1524
ENSDARG00000005072	ENSDART00000079033	1	3	3	AGCGGCCACCAGCTCTGGGTCTTC	6	-	1087	1524
ENSDARG00000005072	ENSDART00000079033	1	4	4	AAAAGCCTCTCGCAGGCTGCTGAT	6	-	1407	1524
ENSDARG00000005072	ENSDART00000079033	1	4	4	CAAACCAGAAAAAAAGTCGTCTTC	6	-	1249	1524
ENSDARG00000005072	ENSDART00000079033	1	4	4	CTAAAAAGCCTCTCGCAGGCTGC	5	-	1411	1524
ENSDARG00000005072	ENSDART00000079033	1	4	4	AAAGTCGTCTTCATCGGATGAGCT	6	-	1237	1524
ENSDARG00000005210	ENSDART00000011645	1	1	1	GAACACTTCGAGTGATGGGGACGCC	7	-	91	1584
ENSDARG00000005210	ENSDART00000011645	1	4	4	GTTTGCTGCCATCTGTGTTGAAGGA	7	-	568	1584
ENSDARG00000005210	ENSDART00000011645	1	6	6	ATCCTCAGAATAAGATGGCTGAGAG	7	-	783	1584
ENSDARG00000005210	ENSDART00000011645	1	7	7	CACCCATTCCCTTCTGTGGTAGAT	6	-	956	1584
ENSDARG00000005210	ENSDART00000011645	1	7	7	TACTCACCCATTCCCTTCTGTGGTA	7	-	959	1584
ENSDARG00000005210	ENSDART00000011645	1	7	7	ACATACGGCTTCTCTGGACTGATTT	7	-	905	1584
ENSDARG00000005210	ENSDART00000011645	1	10	10	GTTTTCTTCAGTGGATGGGAGTAA	6	-	1366	1584
ENSDARG00000005210	ENSDART00000011645	1	10	10	ACCTCATTCTCCGTTTTTGGTGGT	6	-	1443	1584
ENSDARG00000005210	ENSDART00000011645	1	11	11	TGCTGCTTATAAAACATCTGCCGTA	7	-	1466	1584
ENSDARG00000005210	ENSDART00000084526	1	1	1	GAACACTTCGAGTGATGGGGACGCC	7	-	91	1209
ENSDARG00000005210	ENSDART00000084526	1	4	4	GTTTGCTGCCATCTGTGTTGAAGGA	7	-	568	1209
ENSDARG00000005210	ENSDART00000084526	1	6	6	ATCCTCAGAATAAGATGGCTGAGAG	7	-	783	1209
ENSDARG00000005210	ENSDART00000084526	1	7	7	TACCCATTCCCTTCTGTGGTAGAT	6	-	956	1209
ENSDARG00000005210	ENSDART00000084530	1	1	1	GAACACTTCGAGTGATGGGGACGCC	7	-	91	1011
ENSDARG00000005210	ENSDART00000084530	1	4	4	GTTTGCTGCCATCTGTGTTGAAGGA	7	-	568	1011
ENSDARG00000005210	ENSDART00000084530	1	6	6	ATCCTCAGAATAAGATGGCTGAGAG	7	-	783	1011
ENSDARG00000005210	ENSDART00000084530	1	7	7	TACCCATTCCCTTCTGTGGTAGAT	6	-	956	1011
ENSDARG00000005210	ENSDART00000084534	1	1	1	GAACACTTCGAGTGATGGGGACGCC	7	-	91	1287
ENSDARG00000005210	ENSDART00000084534	1	4	4	GTTTGCTGCCATCTGTGTTGAAGGA	7	-	568	1287
ENSDARG00000005210	ENSDART00000084534	1	6	6	ATCCTCAGAATAAGATGGCTGAGAG	7	-	783	1287
ENSDARG00000005210	ENSDART00000084534	1	7	7	TACCCATTCCCTTCTGTGGTAGAT	6	-	956	1287
ENSDARG00000005210	ENSDART00000102300	1	1	1	GAACACTTCGAGTGATGGGGACGCC	7	-	82	1374
ENSDARG00000005210	ENSDART00000102300	1	4	4	GTTTGCTGCCATCTGTGTTGAAGGA	7	-	559	1374
ENSDARG00000005210	ENSDART00000102300	1	6	6	ATCCTCAGAATAAGATGGCTGAGAG	7	-	774	1374
ENSDARG00000005210	ENSDART00000102300	1	7	7	CACCCATTCCCTTCTGTGGTAGAT	6	-	947	1374
ENSDARG00000005210	ENSDART00000102300	1	7	7	ACATACGGCTTCTCTGGACTGATTT	7	-	896	1374
ENSDARG00000005210	ENSDART00000102300	1	7	7	TACTCACCCATTCCCTTCTGTGGTA	7	-	950	1374
ENSDARG00000005213	ENSDART00000020327	1	2	2	TTCATCTCCTTCTTGGCTTGTTT	5	-	100	666
ENSDARG00000005213	ENSDART00000020327	1	3	3	GACCCAGACTCTTGCGTGTGATTG	6	-	311	666
ENSDARG00000005213	ENSDART00000020327	1	3	3	CACCGCAAACATGCTGCTGGGGTC	6	-	262	666
ENSDARG00000005213	ENSDART00000020327	1	3	3	CACCGCAAACATGCTGCTGGGGT	5	-	263	666
ENSDARG00000005213	ENSDART00000020327	1	3	3	CACACCGCAAACATGCTGCTGGGGT	7	-	263	666
ENSDARG00000005213	ENSDART00000020327	1	3	3	CACACCGCAAACATGCTGCTGGG	5	-	265	666
ENSDARG00000005213	ENSDART00000102421	1	2	2	AACTCCACATCTGTGTGTGAGAG	5	-	37	666
ENSDARG00000005213	ENSDART00000102421	1	2	2	TTCATCTCCTTCTTGGCTTGTTT	5	-	106	666
ENSDARG00000005213	ENSDART00000102421	1	4	4	GACCCAGACTCTTGCGTGTGATTG	6	-	311	666
ENSDARG00000005213	ENSDART00000102421	1	4	4	CACCGCAAACATGCTGCTGGGGTC	6	-	262	666
ENSDARG00000005213	ENSDART00000102421	1	4	4	CACCGCAAACATGCTGCTGGGGT	5	-	263	666
ENSDARG00000005213	ENSDART00000102421	1	4	4	CACACCGCAAACATGCTGCTGGGGT	7	-	263	666
ENSDARG00000005213	ENSDART00000102421	1	4	4	CACACCGCAAACATGCTGCTGGG	5	-	265	666
ENSDARG00000005314	ENSDART00000015848	1	2	2	GCCACCAGATACATACGCTGTATTT	7	+	532	750
ENSDARG00000005314	ENSDART00000015848	1	3	3	GCATCAAGCAGTACTTTGAGGAT	5	+	743	750
ENSDARG00000005314	ENSDART00000015848	1	3	3	CCCTGCTTCACGCAGGCCGTCTTC	6	+	625	750
ENSDARG00000005314	ENSDART00000101001	1	1	1	GCCACCAGATACATACGCTGTATTT	7	+	535	1005
ENSDARG00000005314	ENSDART00000101001	1	2	2	CAAACCTGCGCTGAGTCTGAGAA	5	+	909	1005
ENSDARG00000005314	ENSDART00000101001	1	2	2	CCCTGCTTCACGCAGGCCGTCTTC	6	+	628	1005
ENSDARG00000005314	ENSDART00000101001	1	2	2	GCATCAAGCAGTACTTTGAGGAT	5	+	746	1005
ENSDARG00000005314	ENSDART00000101001	1	3	3	GTCAAAAGAAAGCATGGGCGGTG	5	+	977	1005
ENSDARG00000005314	ENSDART00000101001	1	3	3	GTCAAAAGAAAGCATGGGCGGTGTA	7	+	977	1005
ENSDARG00000005479	ENSDART00000005592	1	1	1	TCCTGCACCGCCTGTGTGGTGGC	5	-	109	7785
ENSDARG00000005479	ENSDART00000005592	1	1	1	TCCTGCACCGCCTGTGTGGTGGCA	6	-	108	7785
ENSDARG00000005479	ENSDART00000005592	1	2	2	GGCTGCTGCTTGTGCGGGGGCGGCA	7	-	257	7785
ENSDARG00000005479	ENSDART00000005592	1	2	2	ACAGACGGCTGCTGCTTGTGCGGGG	7	-	263	7785
ENSDARG00000005479	ENSDART00000005592	1	2	2	GACGGCTGCTGCTTGTGCGGGGGC	6	-	261	7785
ENSDARG00000005479	ENSDART00000005592	1	2	2	GGCTGCTGCTTGTGCGGGGGCGGC	6	-	258	7785
ENSDARG00000005479	ENSDART00000005592	1	2	2	TGCGGCTGCTCAGAGAGTTGTGGTT	7	-	298	7785
ENSDARG00000005479	ENSDART00000005592	1	2	2	GACGGCTGCTGCTTGTGCGGGGGCG	7	-	260	7785
ENSDARG00000005479	ENSDART00000005592	1	2	2	TTCAGCGCCGTCACAGACGGCTGC	6	-	276	7785
ENSDARG00000005479	ENSDART00000005592	1	2	2	GCCGTCACAGACGGCTGCTGCTTGT	7	-	269	7785
ENSDARG00000005479	ENSDART00000005592	1	2	2	AGCGCCGTCACAGACGGCTGCTGCT	7	-	272	7785
ENSDARG00000005479	ENSDART00000005592	1	9	9	CACCCCAGCCTGGATTGCAGTGGCA	7	-	1576	7785
ENSDARG00000005479	ENSDART00000005592	1	10	10	GCATTCGCATTTGCCGTCTTTGCA	6	-	1852	7785
ENSDARG00000005479	ENSDART00000005592	1	10	10	GTCCACTGCACACACCTCTGCAAAC	7	-	1716	7785
ENSDARG00000005479	ENSDART00000005592	1	12	12	AGCCACGGCAGAAGGGTTGAGTCT	6	-	2108	7785
ENSDARG00000005479	ENSDART00000005592	1	12	12	AGCCACGGCAGAAGGGTTGAGTC	5	-	2109	7785
ENSDARG00000005479	ENSDART00000005592	1	13	13	GTTGACTCCAATCAGAGGTGTGC	5	-	2315	7785
ENSDARG00000005479	ENSDART00000005592	1	15	15	CACAGCCTCGGACAGGCCGTAGAC	6	-	2899	7785
ENSDARG00000005479	ENSDART00000005592	1	16	16	TCCACCCTCCCATGTTTGAGGCA	5	-	3009	7785
ENSDARG00000005479	ENSDART00000005592	1	16	16	TCCAAAACATGGTGTTTGTCTAG	5	-	3034	7785
ENSDARG00000005479	ENSDART00000005592	1	16	16	ATCCAAAACATGGTGTTTGTCTAG	6	-	3034	7785
ENSDARG00000005479	ENSDART00000005592	1	16	16	ACATCCAAAACATGGTGTTTGTC	5	-	3037	7785
ENSDARG00000005479	ENSDART00000005592	1	17	17	AGATGCGTCTGATGTAGTTGAAGTC	7	-	3256	7785
ENSDARG00000005479	ENSDART00000005592	1	18	18	TACCTCTGCATTCTGCAGCAGCT	5	-	3434	7785
ENSDARG00000005479	ENSDART00000005592	1	18	18	GCATTCTGCAGCAGCTCTTTGGTG	6	-	3426	7785
ENSDARG00000005479	ENSDART00000005592	1	18	18	CACTACCTCTGCATTCTGCAGCA	5	-	3437	7785
ENSDARG00000005479	ENSDART00000005592	1	18	18	TGCAGCAGCTCTTTGGTGCCTGT	5	-	3421	7785
ENSDARG00000005479	ENSDART00000005592	1	18	18	TTCTGCAGCAGCTCTTTGGTGCC	5	-	3424	7785
ENSDARG00000005479	ENSDART00000005592	1	19	19	TTAGACCCCAGCAATGTTGAGAT	5	-	3628	7785
ENSDARG00000005479	ENSDART00000005592	1	19	19	GTACCATCCACAAAGTAGATGAA	5	-	3574	7785
ENSDARG00000005479	ENSDART00000005592	1	19	19	ACCCCAGCAATGTTGAGATGATGCC	7	-	3622	7785
ENSDARG00000005479	ENSDART00000005592	1	19	19	GTTATCACAGGTCAGTGGGCGAG	5	-	3665	7785
ENSDARG00000005479	ENSDART00000005592	1	20	20	CACCAACTCCTGTCCCTGTGCTGTG	7	-	4482	7785
ENSDARG00000005479	ENSDART00000005592	1	20	20	CTCTCCATCCGTGCTGACTTGTCT	6	-	3976	7785
ENSDARG00000005479	ENSDART00000005592	1	20	20	ACCAACTCCTGTCCCTGTGCTGTG	6	-	4482	7785
ENSDARG00000005479	ENSDART00000005592	1	20	20	AGAGACAACTAGAGAGGAAGGAGCA	7	-	4104	7785
ENSDARG00000005479	ENSDART00000005592	1	22	22	TGCACCCGCAAGAATGTGAGGTT	5	-	4844	7785
ENSDARG00000005479	ENSDART00000005592	1	23	23	GGCATCAGCGAAGGTTCTGGAGAC	6	-	5236	7785
ENSDARG00000005479	ENSDART00000005592	1	24	24	TTCTGCACCTCTTTGGCGCAGAA	5	-	6275	7785
ENSDARG00000005479	ENSDART00000005592	1	24	24	CACATCGCCCAGCCGTGTGATGC	5	-	6227	7785
ENSDARG00000005479	ENSDART00000005592	1	24	24	CACATCGCCCAGCCGTGTGATGCG	6	-	6226	7785
ENSDARG00000005479	ENSDART00000005592	1	24	24	CACGGCGGCCAGTGCCTAAGTGTGC	7	-	5500	7785
ENSDARG00000005479	ENSDART00000005592	1	24	24	GTAGCCAACAGAGCGGATAGTTT	5	-	5396	7785
ENSDARG00000005479	ENSDART00000005592	1	26	26	TGCGGCCACTTGTGAGTCGCAGAG	6	-	7379	7785
ENSDARG00000005479	ENSDART00000005592	1	26	26	CAAACCACAGCCAAGGTTTTTCT	5	-	7140	7785
ENSDARG00000005479	ENSDART00000005592	1	26	26	GCAAACCACAGCCAAGGTTTTTCT	6	-	7140	7785
ENSDARG00000005479	ENSDART00000005592	1	26	26	GGCAAACCACAGCCAAGGTTTTTCT	7	-	7140	7785
ENSDARG00000005479	ENSDART00000020867	1	1	1	ACATCCATCTCTATTAAGTTGTC	5	-	49	7506
ENSDARG00000005479	ENSDART00000020867	1	12	12	CACCCCAGCCTGGATTGCAGTGGCA	7	-	1297	7506
ENSDARG00000005479	ENSDART00000020867	1	13	13	GCATTCGCATTTGCCGTCTTTGCA	6	-	1573	7506
ENSDARG00000005479	ENSDART00000020867	1	13	13	GTCCACTGCACACACCTCTGCAAAC	7	-	1437	7506
ENSDARG00000005479	ENSDART00000020867	1	15	15	AGCCACGGCAGAAGGGTTGAGTCT	6	-	1829	7506
ENSDARG00000005479	ENSDART00000020867	1	15	15	AGCCACGGCAGAAGGGTTGAGTC	5	-	1830	7506
ENSDARG00000005479	ENSDART00000020867	1	16	16	GTTGACTCCAATCAGAGGTGTGC	5	-	2036	7506
ENSDARG00000005479	ENSDART00000020867	1	18	18	CACAGCCTCGGACAGGCCGTAGAC	6	-	2620	7506
ENSDARG00000005479	ENSDART00000020867	1	19	19	TCCAAAACATGGTGTTTGTCTAG	5	-	2755	7506
ENSDARG00000005479	ENSDART00000020867	1	19	19	ACATCCAAAACATGGTGTTTGTC	5	-	2758	7506
ENSDARG00000005479	ENSDART00000020867	1	19	19	ATCCAAAACATGGTGTTTGTCTAG	6	-	2755	7506
ENSDARG00000005479	ENSDART00000020867	1	19	19	TCCACCCTCCCATGTTTGAGGCA	5	-	2730	7506
ENSDARG00000005479	ENSDART00000020867	1	20	20	AGATGCGTCTGATGTAGTTGAAGTC	7	-	2977	7506
ENSDARG00000005479	ENSDART00000020867	1	21	21	GCATTCTGCAGCAGCTCTTTGGTG	6	-	3147	7506
ENSDARG00000005479	ENSDART00000020867	1	21	21	CACTACCTCTGCATTCTGCAGCA	5	-	3158	7506
ENSDARG00000005479	ENSDART00000020867	1	21	21	TTCTGCAGCAGCTCTTTGGTGCC	5	-	3145	7506
ENSDARG00000005479	ENSDART00000020867	1	21	21	TACCTCTGCATTCTGCAGCAGCT	5	-	3155	7506
ENSDARG00000005479	ENSDART00000020867	1	21	21	TGCAGCAGCTCTTTGGTGCCTGT	5	-	3142	7506
ENSDARG00000005479	ENSDART00000020867	1	22	22	GTTATCACAGGTCAGTGGGCGAG	5	-	3386	7506
ENSDARG00000005479	ENSDART00000020867	1	22	22	GTACCATCCACAAAGTAGATGAA	5	-	3295	7506
ENSDARG00000005479	ENSDART00000020867	1	22	22	ACCCCAGCAATGTTGAGATGATGCC	7	-	3343	7506
ENSDARG00000005479	ENSDART00000020867	1	22	22	TTAGACCCCAGCAATGTTGAGAT	5	-	3349	7506
ENSDARG00000005479	ENSDART00000020867	1	23	23	AGAGACAACTAGAGAGGAAGGAGCA	7	-	3825	7506
ENSDARG00000005479	ENSDART00000020867	1	23	23	CACCAACTCCTGTCCCTGTGCTGTG	7	-	4203	7506
ENSDARG00000005479	ENSDART00000020867	1	23	23	ACCAACTCCTGTCCCTGTGCTGTG	6	-	4203	7506
ENSDARG00000005479	ENSDART00000020867	1	23	23	CTCTCCATCCGTGCTGACTTGTCT	6	-	3697	7506
ENSDARG00000005479	ENSDART00000020867	1	25	25	TGCACCCGCAAGAATGTGAGGTT	5	-	4565	7506
ENSDARG00000005479	ENSDART00000020867	1	26	26	GGCATCAGCGAAGGTTCTGGAGAC	6	-	4957	7506
ENSDARG00000005479	ENSDART00000020867	1	27	27	GTAGCCAACAGAGCGGATAGTTT	5	-	5117	7506
ENSDARG00000005479	ENSDART00000020867	1	27	27	TTCTGCACCTCTTTGGCGCAGAA	5	-	5996	7506
ENSDARG00000005479	ENSDART00000020867	1	27	27	CACATCGCCCAGCCGTGTGATGC	5	-	5948	7506
ENSDARG00000005479	ENSDART00000020867	1	27	27	CACATCGCCCAGCCGTGTGATGCG	6	-	5947	7506
ENSDARG00000005479	ENSDART00000020867	1	27	27	CACGGCGGCCAGTGCCTAAGTGTGC	7	-	5221	7506
ENSDARG00000005479	ENSDART00000020867	1	29	29	TGCGGCCACTTGTGAGTCGCAGAG	6	-	7100	7506
ENSDARG00000005479	ENSDART00000020867	1	29	29	GCAAACCACAGCCAAGGTTTTTCT	6	-	6861	7506
ENSDARG00000005479	ENSDART00000020867	1	29	29	GGCAAACCACAGCCAAGGTTTTTCT	7	-	6861	7506
ENSDARG00000005479	ENSDART00000020867	1	29	29	CAAACCACAGCCAAGGTTTTTCT	5	-	6861	7506
ENSDARG00000005479	ENSDART00000023982	1	1	1	GCACGCGACAGTCCTCGCTGTCGCC	7	-	91	8139
ENSDARG00000005479	ENSDART00000023982	1	2	2	GTCCACGTCTGAGCCTGCGCCAAC	6	-	343	8139
ENSDARG00000005479	ENSDART00000023982	1	2	2	AGCTGCCTCAGGTTGAAGTTTTG	5	-	244	8139
ENSDARG00000005479	ENSDART00000023982	1	2	2	CCCAGCTGCCTCAGGTTGAAGTT	5	-	247	8139
ENSDARG00000005479	ENSDART00000023982	1	2	2	GGCCAAGCCACGGCGTGTGGCTGGT	7	-	279	8139
ENSDARG00000005479	ENSDART00000023982	1	2	2	TGCGCCAACGGAGTAGCCGCGGTG	6	-	328	8139
ENSDARG00000005479	ENSDART00000023982	1	2	2	GCCTGCGCCAACGGAGTAGCCGCG	6	-	331	8139
ENSDARG00000005479	ENSDART00000023982	1	3	3	GACGGCTGCTGCTTGTGCGGGGGC	6	-	573	8139
ENSDARG00000005479	ENSDART00000023982	1	3	3	GGCTGCTGCTTGTGCGGGGGCGGC	6	-	570	8139
ENSDARG00000005479	ENSDART00000023982	1	3	3	GGCTGCTGCTTGTGCGGGGGCGGCA	7	-	569	8139
ENSDARG00000005479	ENSDART00000023982	1	3	3	GACGGCTGCTGCTTGTGCGGGGGCG	7	-	572	8139
ENSDARG00000005479	ENSDART00000023982	1	3	3	GCCGTCACAGACGGCTGCTGCTTGT	7	-	581	8139
ENSDARG00000005479	ENSDART00000023982	1	3	3	ACAGACGGCTGCTGCTTGTGCGGGG	7	-	575	8139
ENSDARG00000005479	ENSDART00000023982	1	3	3	AGCGCCGTCACAGACGGCTGCTGCT	7	-	584	8139
ENSDARG00000005479	ENSDART00000023982	1	3	3	TTCAGCGCCGTCACAGACGGCTGC	6	-	588	8139
ENSDARG00000005479	ENSDART00000023982	1	3	3	TGCGGCTGCTCAGAGAGTTGTGGTT	7	-	610	8139
ENSDARG00000005479	ENSDART00000023982	1	10	10	CACCCCAGCCTGGATTGCAGTGGCA	7	-	1888	8139
ENSDARG00000005479	ENSDART00000023982	1	11	11	GCATTCGCATTTGCCGTCTTTGCA	6	-	2164	8139
ENSDARG00000005479	ENSDART00000023982	1	11	11	GTCCACTGCACACACCTCTGCAAAC	7	-	2028	8139
ENSDARG00000005479	ENSDART00000023982	1	13	13	AGCCACGGCAGAAGGGTTGAGTC	5	-	2448	8139
ENSDARG00000005479	ENSDART00000023982	1	13	13	AGCCACGGCAGAAGGGTTGAGTCT	6	-	2447	8139
ENSDARG00000005479	ENSDART00000023982	1	14	14	GTTGACTCCAATCAGAGGTGTGC	5	-	2654	8139
ENSDARG00000005479	ENSDART00000023982	1	16	16	CACAGCCTCGGACAGGCCGTAGAC	6	-	3238	8139
ENSDARG00000005479	ENSDART00000023982	1	17	17	TCCACCCTCCCATGTTTGAGGCA	5	-	3348	8139
ENSDARG00000005479	ENSDART00000023982	1	17	17	ACATCCAAAACATGGTGTTTGTC	5	-	3376	8139
ENSDARG00000005479	ENSDART00000023982	1	17	17	ATCCAAAACATGGTGTTTGTCTAG	6	-	3373	8139
ENSDARG00000005479	ENSDART00000023982	1	17	17	TCCAAAACATGGTGTTTGTCTAG	5	-	3373	8139
ENSDARG00000005479	ENSDART00000023982	1	18	18	AGATGCGTCTGATGTAGTTGAAGTC	7	-	3595	8139
ENSDARG00000005479	ENSDART00000023982	1	20	20	TACCTCTGCATTCTGCAGCAGCT	5	-	3794	8139
ENSDARG00000005479	ENSDART00000023982	1	20	20	TGCAGCAGCTCTTTGGTGCCTGT	5	-	3781	8139
ENSDARG00000005479	ENSDART00000023982	1	20	20	GCATTCTGCAGCAGCTCTTTGGTG	6	-	3786	8139
ENSDARG00000005479	ENSDART00000023982	1	20	20	CACTACCTCTGCATTCTGCAGCA	5	-	3797	8139
ENSDARG00000005479	ENSDART00000023982	1	20	20	TTCTGCAGCAGCTCTTTGGTGCC	5	-	3784	8139
ENSDARG00000005479	ENSDART00000023982	1	21	21	GTACCATCCACAAAGTAGATGAA	5	-	3934	8139
ENSDARG00000005479	ENSDART00000023982	1	21	21	ACCCCAGCAATGTTGAGATGATGCC	7	-	3982	8139
ENSDARG00000005479	ENSDART00000023982	1	21	21	TTAGACCCCAGCAATGTTGAGAT	5	-	3988	8139
ENSDARG00000005479	ENSDART00000023982	1	21	21	GTTATCACAGGTCAGTGGGCGAG	5	-	4025	8139
ENSDARG00000005479	ENSDART00000023982	1	22	22	ACCAACTCCTGTCCCTGTGCTGTG	6	-	4842	8139
ENSDARG00000005479	ENSDART00000023982	1	22	22	CACCAACTCCTGTCCCTGTGCTGTG	7	-	4842	8139
ENSDARG00000005479	ENSDART00000023982	1	22	22	AGAGACAACTAGAGAGGAAGGAGCA	7	-	4464	8139
ENSDARG00000005479	ENSDART00000023982	1	22	22	CTCTCCATCCGTGCTGACTTGTCT	6	-	4336	8139
ENSDARG00000005479	ENSDART00000023982	1	24	24	TGCACCCGCAAGAATGTGAGGTT	5	-	5204	8139
ENSDARG00000005479	ENSDART00000023982	1	25	25	GGCATCAGCGAAGGTTCTGGAGAC	6	-	5596	8139
ENSDARG00000005479	ENSDART00000023982	1	26	26	TTCTGCACCTCTTTGGCGCAGAA	5	-	6635	8139
ENSDARG00000005479	ENSDART00000023982	1	26	26	CACATCGCCCAGCCGTGTGATGC	5	-	6587	8139
ENSDARG00000005479	ENSDART00000023982	1	26	26	CACATCGCCCAGCCGTGTGATGCG	6	-	6586	8139
ENSDARG00000005479	ENSDART00000023982	1	26	26	GTAGCCAACAGAGCGGATAGTTT	5	-	5756	8139
ENSDARG00000005479	ENSDART00000023982	1	26	26	CACGGCGGCCAGTGCCTAAGTGTGC	7	-	5860	8139
ENSDARG00000005479	ENSDART00000023982	1	28	28	GCAAACCACAGCCAAGGTTTTTCT	6	-	7494	8139
ENSDARG00000005479	ENSDART00000023982	1	28	28	CAAACCACAGCCAAGGTTTTTCT	5	-	7494	8139
ENSDARG00000005479	ENSDART00000023982	1	28	28	GGCAAACCACAGCCAAGGTTTTTCT	7	-	7494	8139
ENSDARG00000005479	ENSDART00000023982	1	28	28	TGCGGCCACTTGTGAGTCGCAGAG	6	-	7733	8139
ENSDARG00000005479	ENSDART00000033250	1	2	2	GGCTGCTGCTTGTGCGGGGGCGGCA	7	-	95	7680
ENSDARG00000005479	ENSDART00000033250	1	2	2	GGCTGCTGCTTGTGCGGGGGCGGC	6	-	96	7680
ENSDARG00000005479	ENSDART00000033250	1	2	2	GCCGTCACAGACGGCTGCTGCTTGT	7	-	107	7680
ENSDARG00000005479	ENSDART00000033250	1	2	2	TGCGGCTGCTCAGAGAGTTGTGGTT	7	-	136	7680
ENSDARG00000005479	ENSDART00000033250	1	2	2	GACGGCTGCTGCTTGTGCGGGGGCG	7	-	98	7680
ENSDARG00000005479	ENSDART00000033250	1	2	2	GACGGCTGCTGCTTGTGCGGGGGC	6	-	99	7680
ENSDARG00000005479	ENSDART00000033250	1	2	2	AGCGCCGTCACAGACGGCTGCTGCT	7	-	110	7680
ENSDARG00000005479	ENSDART00000033250	1	2	2	TTCAGCGCCGTCACAGACGGCTGC	6	-	114	7680
ENSDARG00000005479	ENSDART00000033250	1	2	2	ACAGACGGCTGCTGCTTGTGCGGGG	7	-	101	7680
ENSDARG00000005479	ENSDART00000033250	1	10	10	CACCCCAGCCTGGATTGCAGTGGCA	7	-	1414	7680
ENSDARG00000005479	ENSDART00000033250	1	11	11	GCATTCGCATTTGCCGTCTTTGCA	6	-	1690	7680
ENSDARG00000005479	ENSDART00000033250	1	11	11	GTCCACTGCACACACCTCTGCAAAC	7	-	1554	7680
ENSDARG00000005479	ENSDART00000033250	1	15	15	AGCCACGGCAGAAGGGTTGAGTCT	6	-	1982	7680
ENSDARG00000005479	ENSDART00000033250	1	15	15	AGCCACGGCAGAAGGGTTGAGTC	5	-	1983	7680
ENSDARG00000005479	ENSDART00000033250	1	16	16	GTTGACTCCAATCAGAGGTGTGC	5	-	2189	7680
ENSDARG00000005479	ENSDART00000033250	1	18	18	CACAGCCTCGGACAGGCCGTAGAC	6	-	2773	7680
ENSDARG00000005479	ENSDART00000033250	1	19	19	ACATCCAAAACATGGTGTTTGTC	5	-	2911	7680
ENSDARG00000005479	ENSDART00000033250	1	19	19	TCCAAAACATGGTGTTTGTCTAG	5	-	2908	7680
ENSDARG00000005479	ENSDART00000033250	1	19	19	TCCACCCTCCCATGTTTGAGGCA	5	-	2883	7680
ENSDARG00000005479	ENSDART00000033250	1	19	19	ATCCAAAACATGGTGTTTGTCTAG	6	-	2908	7680
ENSDARG00000005479	ENSDART00000033250	1	20	20	AGATGCGTCTGATGTAGTTGAAGTC	7	-	3130	7680
ENSDARG00000005479	ENSDART00000033250	1	22	22	TTCTGCAGCAGCTCTTTGGTGCC	5	-	3319	7680
ENSDARG00000005479	ENSDART00000033250	1	22	22	GCATTCTGCAGCAGCTCTTTGGTG	6	-	3321	7680
ENSDARG00000005479	ENSDART00000033250	1	22	22	TGCAGCAGCTCTTTGGTGCCTGT	5	-	3316	7680
ENSDARG00000005479	ENSDART00000033250	1	22	22	CACTACCTCTGCATTCTGCAGCA	5	-	3332	7680
ENSDARG00000005479	ENSDART00000033250	1	22	22	TACCTCTGCATTCTGCAGCAGCT	5	-	3329	7680
ENSDARG00000005479	ENSDART00000033250	1	23	23	GTTATCACAGGTCAGTGGGCGAG	5	-	3560	7680
ENSDARG00000005479	ENSDART00000033250	1	23	23	GTACCATCCACAAAGTAGATGAA	5	-	3469	7680
ENSDARG00000005479	ENSDART00000033250	1	23	23	TTAGACCCCAGCAATGTTGAGAT	5	-	3523	7680
ENSDARG00000005479	ENSDART00000033250	1	23	23	ACCCCAGCAATGTTGAGATGATGCC	7	-	3517	7680
ENSDARG00000005479	ENSDART00000033250	1	24	24	CACCAACTCCTGTCCCTGTGCTGTG	7	-	4377	7680
ENSDARG00000005479	ENSDART00000033250	1	24	24	CTCTCCATCCGTGCTGACTTGTCT	6	-	3871	7680
ENSDARG00000005479	ENSDART00000033250	1	24	24	AGAGACAACTAGAGAGGAAGGAGCA	7	-	3999	7680
ENSDARG00000005479	ENSDART00000033250	1	24	24	ACCAACTCCTGTCCCTGTGCTGTG	6	-	4377	7680
ENSDARG00000005479	ENSDART00000033250	1	26	26	TGCACCCGCAAGAATGTGAGGTT	5	-	4739	7680
ENSDARG00000005479	ENSDART00000033250	1	27	27	GGCATCAGCGAAGGTTCTGGAGAC	6	-	5131	7680
ENSDARG00000005479	ENSDART00000033250	1	28	28	TTCTGCACCTCTTTGGCGCAGAA	5	-	6170	7680
ENSDARG00000005479	ENSDART00000033250	1	28	28	GTAGCCAACAGAGCGGATAGTTT	5	-	5291	7680
ENSDARG00000005479	ENSDART00000033250	1	28	28	CACATCGCCCAGCCGTGTGATGC	5	-	6122	7680
ENSDARG00000005479	ENSDART00000033250	1	28	28	CACATCGCCCAGCCGTGTGATGCG	6	-	6121	7680
ENSDARG00000005479	ENSDART00000033250	1	28	28	CACGGCGGCCAGTGCCTAAGTGTGC	7	-	5395	7680
ENSDARG00000005479	ENSDART00000033250	1	30	30	GCAAACCACAGCCAAGGTTTTTCT	6	-	7035	7680
ENSDARG00000005479	ENSDART00000033250	1	30	30	TGCGGCCACTTGTGAGTCGCAGAG	6	-	7274	7680
ENSDARG00000005479	ENSDART00000033250	1	30	30	GGCAAACCACAGCCAAGGTTTTTCT	7	-	7035	7680
ENSDARG00000005479	ENSDART00000033250	1	30	30	CAAACCACAGCCAAGGTTTTTCT	5	-	7035	7680
ENSDARG00000005479	ENSDART00000084891	1	2	1	GCACGCGACAGTCCTCGCTGTCGCC	7	-	91	567
ENSDARG00000005479	ENSDART00000084891	1	3	2	TGCGCCAACGGAGTAGCCGCGGTG	6	-	328	567
ENSDARG00000005479	ENSDART00000084891	1	3	2	GTCCACGTCTGAGCCTGCGCCAAC	6	-	343	567
ENSDARG00000005479	ENSDART00000084891	1	3	2	GGCCAAGCCACGGCGTGTGGCTGGT	7	-	279	567
ENSDARG00000005479	ENSDART00000084891	1	3	2	GCCTGCGCCAACGGAGTAGCCGCG	6	-	331	567
ENSDARG00000005479	ENSDART00000084891	1	3	2	CCCAGCTGCCTCAGGTTGAAGTT	5	-	247	567
ENSDARG00000005479	ENSDART00000084891	1	3	2	AGCTGCCTCAGGTTGAAGTTTTG	5	-	244	567
ENSDARG00000005525	ENSDART00000004233	1	5	3	TCCGTCTCCAAGCATGGCTTTTGT	6	+	514	942
ENSDARG00000005525	ENSDART00000004233	1	5	3	TCCGTCTCCAAGCATGGCTTTTGTA	7	+	514	942
ENSDARG00000005525	ENSDART00000004233	1	6	4	GGCCGCAGCCCCATGGTGTTGTC	5	+	548	942
ENSDARG00000005578	ENSDART00000010449	1	1	1	GCCAAAACACCAGAGGCCGAGGTA	6	+	91	1479
ENSDARG00000005578	ENSDART00000010449	1	1	1	CGCCAAAACACCAGAGGCCGAGGTA	7	+	90	1479
ENSDARG00000005578	ENSDART00000010449	1	1	1	ACCGCCAAAACACCAGAGGCCGAG	6	+	88	1479
ENSDARG00000005578	ENSDART00000010449	1	2	2	GTTTCCTTCAGGAGAAGGGGCCGTC	7	+	155	1479
ENSDARG00000005578	ENSDART00000010449	1	4	4	AACTCATTCAACACTGATGAAGAC	6	+	451	1479
ENSDARG00000005578	ENSDART00000010449	1	5	5	CCCAACGACAAACGCTGCGAGTTC	6	+	775	1479
ENSDARG00000005578	ENSDART00000010449	1	6	6	ACCAACAACCTGTGGATGAGTCT	5	+	949	1479
ENSDARG00000005578	ENSDART00000010449	1	6	6	GCCCAAAGCTCACGTAGACGAGTTC	7	+	894	1479
ENSDARG00000005578	ENSDART00000010449	1	6	6	AACACCAACAACCTGTGGATGAG	5	+	946	1479
ENSDARG00000005578	ENSDART00000010449	1	6	6	AACACCAACAACCTGTGGATGAGTC	7	+	946	1479
ENSDARG00000005578	ENSDART00000010449	1	7	7	ATCTCCAGACTCTAGATGGCGGT	5	+	1028	1479
ENSDARG00000005578	ENSDART00000010449	1	7	7	AACCACGTCTGACCTGCTGCTGGT	6	+	1152	1479
ENSDARG00000005578	ENSDART00000010449	1	7	7	GGCAGCTCCTTCACTAAGGTGAG	5	+	1261	1479
ENSDARG00000005578	ENSDART00000010449	1	7	7	GTCGGCGCCGCCATGAAGAGTTT	5	+	1078	1479
ENSDARG00000005578	ENSDART00000010449	1	7	7	ACACCACACGTCAAACTGGGCAGCT	7	+	1243	1479
ENSDARG00000005584	ENSDART00000020237	1	1	1	GCATTCACAAGTTTGTTGACGAA	5	+	275	1989
ENSDARG00000005584	ENSDART00000020237	1	1	1	AAATACACCATGGTGCTGTTTAC	5	+	220	1989
ENSDARG00000005584	ENSDART00000020237	1	1	1	AAATTCAGAACATATTTGGTGAA	5	+	188	1989
ENSDARG00000005584	ENSDART00000020237	1	5	5	AAAACCAGCTTTGAAGCAGAGGCT	6	+	1891	1989
ENSDARG00000005584	ENSDART00000041663	1	1	1	AAATACACCATGGTGCTGTTTAC	5	+	358	1353
ENSDARG00000005584	ENSDART00000041663	1	1	1	AAATTCAGAACATATTTGGTGAA	5	+	326	1353
ENSDARG00000005584	ENSDART00000041663	1	1	1	GCATTCACAAGTTTGTTGACGAA	5	+	413	1353
ENSDARG00000005626	ENSDART00000003097	1	1	1	ACATTCCCACTGCCTTTGACAAC	5	+	170	708
ENSDARG00000005626	ENSDART00000003097	1	1	1	GGCAGCATCTGAACGCCGGGTAA	5	+	66	708
ENSDARG00000005626	ENSDART00000003097	1	3	3	GCATGCAGAGGAGTCGATGTGGCC	6	+	609	708
ENSDARG00000005690	ENSDART00000012430	1	1	1	GTTGACATCCACCCGGCCGTCTTT	6	-	124	1443
ENSDARG00000005690	ENSDART00000012430	1	4	4	ACACACACCTTTGCAGTATTTTAG	6	-	404	1443
ENSDARG00000005690	ENSDART00000012430	1	6	6	GGCTCCTGCCATCAGCTGCCGCC	5	-	605	1443
ENSDARG00000005690	ENSDART00000012430	1	9	9	TCCTTCTGCAGGATCTGTTTGGCA	6	-	1014	1443
ENSDARG00000005690	ENSDART00000012430	1	9	9	ACACACACCTCATAGACGGCGAG	5	-	1108	1443
ENSDARG00000005690	ENSDART00000012430	1	10	10	GCCAGCTGCCCACAGGTGCTGGA	5	-	1207	1443
ENSDARG00000005690	ENSDART00000012430	1	10	10	AGCTGCCCACAGGTGCTGGAAAC	5	-	1204	1443
ENSDARG00000005690	ENSDART00000012430	1	11	11	GCCCCCTTAATCGACGCTGGAGGA	6	-	1266	1443
ENSDARG00000005690	ENSDART00000012430	1	11	11	GTAGACCACGTAGGAGATGCTGAC	6	-	1396	1443
ENSDARG00000005690	ENSDART00000074058	1	1	1	GTTGACATCCACCCGGCCGTCTTT	6	-	121	1440
ENSDARG00000005690	ENSDART00000074058	1	3	3	ACACACACCTTTGCAGTATTTTAG	6	-	395	1440
ENSDARG00000005690	ENSDART00000074058	1	5	5	GGCTCCTGCCATCAGCTGCCGCC	5	-	596	1440
ENSDARG00000005690	ENSDART00000074058	1	8	8	ACACACACCTCATAGACGGCGAG	5	-	1105	1440
ENSDARG00000005690	ENSDART00000074058	1	8	8	TCCTTCTGCAGGATCTGTTTGGCA	6	-	1011	1440
ENSDARG00000005690	ENSDART00000074058	1	9	9	GCCAGCTGCCCACAGGTGCTGGA	5	-	1204	1440
ENSDARG00000005690	ENSDART00000074058	1	9	9	AGCTGCCCACAGGTGCTGGAAAC	5	-	1201	1440
ENSDARG00000005690	ENSDART00000074058	1	10	10	GCCCCCTTAATCGACGCTGGAGGA	6	-	1263	1440
ENSDARG00000005690	ENSDART00000074058	1	10	10	GTAGACCACGTAGGAGATGCTGAC	6	-	1393	1440
ENSDARG00000005739	ENSDART00000019770	1	1	1	ACACCACCCAGACATTTGATGCA	5	-	2	777
ENSDARG00000005739	ENSDART00000019770	1	1	1	GACACCACCCAGACATTTGATGCA	6	-	2	777
ENSDARG00000005739	ENSDART00000019770	1	3	3	GCCTCACCATAGCACTGATGCAGCG	7	-	310	777
ENSDARG00000005739	ENSDART00000019770	1	3	3	GCCCTCGGCCAGTAAGATGATGCC	6	-	226	777
ENSDARG00000005739	ENSDART00000019770	1	3	3	AGCGTCCACAAACAGTTGTCTTG	5	-	291	777
ENSDARG00000005739	ENSDART00000019770	1	3	3	AAAGCCCTCGGCCAGTAAGATGAT	6	-	229	777
ENSDARG00000005739	ENSDART00000101911	1	1	1	TCCTCAGCCGTCGATTCTGGTTTC	6	-	21	867
ENSDARG00000005739	ENSDART00000101911	1	1	1	GTTTCATCCCATCCATTTGTTAAC	6	-	2	867
ENSDARG00000005739	ENSDART00000101911	1	1	1	CTCCTCAGCCGTCGATTCTGGTTTC	7	-	21	867
ENSDARG00000005739	ENSDART00000101911	1	2	2	ACACCACCCAGACATTTGATGCA	5	-	88	867
ENSDARG00000005739	ENSDART00000101911	1	2	2	GACACCACCCAGACATTTGATGCA	6	-	88	867
ENSDARG00000005739	ENSDART00000101911	1	3	3	GCCTCACCATAGCACTGATGCAGCG	7	-	400	867
ENSDARG00000005739	ENSDART00000101911	1	3	3	GCCCTCGGCCAGTAAGATGATGCC	6	-	316	867
ENSDARG00000005739	ENSDART00000101911	1	3	3	AGCGTCCACAAACAGTTGTCTTG	5	-	381	867
ENSDARG00000005739	ENSDART00000101911	1	3	3	AAAGCCCTCGGCCAGTAAGATGAT	6	-	319	867
ENSDARG00000005799	ENSDART00000008201	1	4	3	ATCCCATAATAATCATGGGTATAG	6	-	170	309
ENSDARG00000005799	ENSDART00000008201	1	4	3	GTCGCCTTCTACTGAGGAGTTGGGG	7	-	141	309
ENSDARG00000005799	ENSDART00000008201	1	4	3	GTCGCCTTCTACTGAGGAGTTGGG	6	-	142	309
ENSDARG00000005799	ENSDART00000008201	1	5	4	CTAGTCCACTGGAGGTGCTGGCGGC	7	-	297	309
ENSDARG00000005937	ENSDART00000016877	1	1	1	ACCCTCAGCTCTGAGCTTGATAG	5	-	23	1026
ENSDARG00000005937	ENSDART00000016877	1	2	2	TTAAACTTCTTCCCCAGTATGAGCT	7	-	194	1026
ENSDARG00000005937	ENSDART00000016877	1	4	4	TCCCTCCTCATGGATCTGAGGTA	5	-	548	1026
ENSDARG00000005937	ENSDART00000016877	1	4	4	CTCTTCAGACAGGCGATGGCGTT	5	-	622	1026
ENSDARG00000005937	ENSDART00000016877	1	6	6	GTAGCCAAAAAGGTTTTTGTAGCG	6	-	979	1026
ENSDARG00000006225	ENSDART00000014727	1	2	1	AGCCACCACTGGCAAGAAGGAGGT	6	+	87	1281
ENSDARG00000006225	ENSDART00000014727	1	3	2	AAAGACTGCCGTGTTTGTGCTTGC	6	+	288	1281
ENSDARG00000006225	ENSDART00000014727	1	4	3	AAAAACGTCAAACACTTTGTTTTG	6	+	568	1281
ENSDARG00000006225	ENSDART00000014727	1	4	3	AACGTCAAACACTTTGTTTTGGA	5	+	571	1281
ENSDARG00000006225	ENSDART00000014727	1	4	3	AACGTCAAACACTTTGTTTTGGAC	6	+	571	1281
ENSDARG00000006225	ENSDART00000014727	1	4	3	AACTGCCCACACATTGTTGTGGGA	6	+	496	1281
ENSDARG00000006225	ENSDART00000014727	1	4	3	TGCCCACACATTGTTGTGGGAAC	5	+	499	1281
ENSDARG00000006225	ENSDART00000014727	1	6	5	AAACTAAGCTTACCCTGCATGGTCT	7	+	767	1281
ENSDARG00000006225	ENSDART00000014727	1	8	7	TTCAGCGGCGGATTCTGGTGGCTAC	7	+	1013	1281
ENSDARG00000006392	ENSDART00000002886	1	4	4	AGACACAGAATCCCTCTGTGTAG	5	+	357	1185
ENSDARG00000006392	ENSDART00000002886	1	4	4	AGACACAGAATCCCTCTGTGTAGTT	7	+	357	1185
ENSDARG00000006392	ENSDART00000002886	1	4	4	TTAAACAGACAGCTGGAGAGGTG	5	+	313	1185
ENSDARG00000006392	ENSDART00000002886	1	9	9	CAACACTTAAGAGAGATGAAGCC	5	+	890	1185
ENSDARG00000006434	ENSDART00000054574	1	1	1	GTTTTCCACGAACAGGTCGCCGCC	6	-	12	1239
ENSDARG00000006434	ENSDART00000054574	1	6	6	AGAGCCCGCTTCTGTTTATTTGTC	6	-	414	1239
ENSDARG00000006434	ENSDART00000054574	1	6	6	TGCCACAGCCTGATGGAGCGTTT	5	-	470	1239
ENSDARG00000006434	ENSDART00000054574	1	8	8	GTCTTCAGAGCTCAGGGTTGCGTAC	7	-	690	1239
ENSDARG00000006434	ENSDART00000054574	1	10	10	AAATTCTTCAGCACTTTGTTGAT	5	-	904	1239
ENSDARG00000006434	ENSDART00000054574	1	10	10	TTCTTCAGCACTTTGTTGATGAT	5	-	901	1239
ENSDARG00000006434	ENSDART00000054574	1	12	12	GCCCCCTTCTTTGCCTAAGGCGTT	6	-	1132	1239
ENSDARG00000006434	ENSDART00000054574	1	12	12	CTATCAAGCCCCCTTCTTTGCCTAA	7	-	1138	1239
ENSDARG00000006474	ENSDART00000053860	1	2	2	TTATACTTCAGTTGGGGCTTGAGGC	7	-	170	1395
ENSDARG00000006474	ENSDART00000053860	1	3	3	AAATCAATCTCTCCAGACTTGGGC	6	-	294	1395
ENSDARG00000006474	ENSDART00000053860	1	4	4	TTCCCAAACTTTGTGGCAGGAGGT	6	-	498	1395
ENSDARG00000006474	ENSDART00000053860	1	4	4	GTCTCAATCCTGTCGGAGGATGTC	6	-	1356	1395
ENSDARG00000006474	ENSDART00000053860	1	4	4	GTCTCAATCCTGTCGGAGGATGT	5	-	1357	1395
ENSDARG00000006474	ENSDART00000053860	1	4	4	GTATTCCACTGACTTCTGCATTT	5	-	875	1395
ENSDARG00000006474	ENSDART00000053860	1	4	4	GTACTCTTCTGGAGGTTTGACGTA	6	-	673	1395
ENSDARG00000006474	ENSDART00000053860	1	4	4	GAATTCCCAAACTTTGTGGCAGGA	6	-	501	1395
ENSDARG00000006474	ENSDART00000053860	1	4	4	GAAGTCATCCCTCATGGTGGTGTTG	7	-	1026	1395
ENSDARG00000006474	ENSDART00000053860	1	4	4	GAAGTCATCCCTCATGGTGGTGTT	6	-	1027	1395
ENSDARG00000006474	ENSDART00000053860	1	4	4	GAACACAAACCCTGGTGGCGTCT	5	-	1292	1395
ENSDARG00000006474	ENSDART00000053860	1	4	4	GAAATCATCCTGGAAGGTTGTGGAA	7	-	522	1395
ENSDARG00000006526	ENSDART00000017312	1	2	2	CACCCATCCAGATGAGAAGATGTT	6	+	105	582
ENSDARG00000006526	ENSDART00000017312	1	3	3	CACAAAATCCTAGAGGAAGTCGTC	6	+	232	582
ENSDARG00000006526	ENSDART00000017312	1	3	3	GTCCTATAATGTCATTGTGGAGGCC	7	+	189	582
ENSDARG00000006526	ENSDART00000017312	1	3	3	GTCCTATAATGTCATTGTGGAGGC	6	+	189	582
ENSDARG00000006526	ENSDART00000017312	1	3	3	ACAAAATCCTAGAGGAAGTCGTC	5	+	233	582
ENSDARG00000006526	ENSDART00000017312	1	3	3	CACAACTGCCACTCTTATTGGTC	5	+	153	582
ENSDARG00000006526	ENSDART00000017312	1	4	4	CACGGCCACTCACCACGATGTCGGA	7	+	318	582
ENSDARG00000006526	ENSDART00000017312	1	4	4	CACTCACCACGATGTCGGAGCGGAA	7	+	324	582
ENSDARG00000006526	ENSDART00000023692	1	1	1	GTAAAAGACAAGCCCAGCAGCAGCA	7	+	95	7212
ENSDARG00000006526	ENSDART00000023692	1	5	5	GACTGCACATGTTTGGGAGAGGGA	6	+	655	7212
ENSDARG00000006526	ENSDART00000023692	1	7	7	GTCCTATTACAATGGCATGAGCT	5	+	972	7212
ENSDARG00000006526	ENSDART00000023692	1	10	10	TTATACAGCTCACGAGGAAGTCTGC	7	+	1419	7212
ENSDARG00000006526	ENSDART00000023692	1	14	14	ACACGCACACCATGGAAGGAGGT	5	+	1969	7212
ENSDARG00000006526	ENSDART00000023692	1	14	14	GGCCTCAAAGCAGGTTTGACGTA	5	+	2029	7212
ENSDARG00000006526	ENSDART00000023692	1	15	15	CCCAGCCTCGACAAGTAGTGGAC	5	+	2156	7212
ENSDARG00000006526	ENSDART00000023692	1	15	15	CACCCAGCCTCGACAAGTAGTGGAC	7	+	2154	7212
ENSDARG00000006526	ENSDART00000023692	1	24	24	AAAAACCACCTGGAGAGTGAGCC	5	+	3763	7212
ENSDARG00000006526	ENSDART00000023692	1	26	26	GCCAAATACAGAGTATCTGGTGAA	6	+	4008	7212
ENSDARG00000006526	ENSDART00000023692	1	27	27	TTATCAACCAACAAGTGGTGGGC	5	+	4194	7212
ENSDARG00000006526	ENSDART00000023692	1	27	27	TTATCAACCAACAAGTGGTGGGCG	6	+	4194	7212
ENSDARG00000006526	ENSDART00000023692	1	27	27	GTTATCAACCAACAAGTGGTGGGC	6	+	4193	7212
ENSDARG00000006526	ENSDART00000023692	1	27	27	GTTATCAACCAACAAGTGGTGGGCG	7	+	4193	7212
ENSDARG00000006526	ENSDART00000023692	1	27	27	AGAAACTACTTCACGCTGGTGAA	5	+	4246	7212
ENSDARG00000006526	ENSDART00000023692	1	29	29	GCCACCATCCAGGGTCTGCGGCC	5	+	4513	7212
ENSDARG00000006526	ENSDART00000023692	1	30	30	TGCGTCGCCATCAGATTTAGATGTT	7	+	4641	7212
ENSDARG00000006526	ENSDART00000023692	1	32	32	ACCTCCTACAGGGTTCTGTATTC	5	+	4999	7212
ENSDARG00000006526	ENSDART00000023692	1	32	32	GTACCAACCTGCCTTAAGTGGAC	5	+	5046	7212
ENSDARG00000006526	ENSDART00000023692	1	33	33	CAAGTCTTAGTGCCTGGGCTTGT	5	+	5371	7212
ENSDARG00000006526	ENSDART00000023692	1	35	35	AGCCACGCCCAAAAATGGAGGTTAC	7	+	5589	7212
ENSDARG00000006526	ENSDART00000023692	1	39	39	GCCTGCCCAGTCATGGTGGCCGAG	6	+	6056	7212
ENSDARG00000006526	ENSDART00000023692	1	39	39	CACCCATCCAGATGAGAAGATGTT	6	+	6495	7212
ENSDARG00000006526	ENSDART00000023692	1	40	40	GTCCTATAATGTCATTGTGGAGGC	6	+	6579	7212
ENSDARG00000006526	ENSDART00000023692	1	40	40	ACAAAATCCTAGAGGAAGTCGTC	5	+	6623	7212
ENSDARG00000006526	ENSDART00000023692	1	40	40	CACAACTGCCACTCTTATTGGTC	5	+	6543	7212
ENSDARG00000006526	ENSDART00000023692	1	40	40	CACAAAATCCTAGAGGAAGTCGTC	6	+	6622	7212
ENSDARG00000006526	ENSDART00000023692	1	40	40	GTCCTATAATGTCATTGTGGAGGCC	7	+	6579	7212
ENSDARG00000006526	ENSDART00000023692	1	41	41	CACTCACCACGATGTCGGAGCGGAA	7	+	6714	7212
ENSDARG00000006526	ENSDART00000023692	1	41	41	CACGGCCACTCACCACGATGTCGGA	7	+	6708	7212
ENSDARG00000006526	ENSDART00000023692	1	44	44	AACAACGGCCAAAGGGTGGTGAG	5	+	7129	7212
ENSDARG00000006526	ENSDART00000023692	1	44	44	AACAACGGCCAAAGGGTGGTGAGTA	7	+	7129	7212
ENSDARG00000006526	ENSDART00000023692	1	44	44	AACTGCAGAAGGCCAGGTGCTGAG	6	+	7072	7212
ENSDARG00000006526	ENSDART00000023692	1	45	45	ATCCCAAAACCCAAGAGTGAAAC	5	+	7205	7212
ENSDARG00000006526	ENSDART00000081570	1	1	1	GTAAAAGACAAGCCCAGCAGCAGCA	7	+	95	7467
ENSDARG00000006526	ENSDART00000081570	1	5	5	GACTGCACATGTTTGGGAGAGGGA	6	+	622	7467
ENSDARG00000006526	ENSDART00000081570	1	7	7	GTCCTATTACAATGGCATGAGCT	5	+	939	7467
ENSDARG00000006526	ENSDART00000081570	1	10	10	TTATACAGCTCACGAGGAAGTCTGC	7	+	1386	7467
ENSDARG00000006526	ENSDART00000081570	1	15	15	ACACGCACACCATGGAAGGAGGT	5	+	1948	7467
ENSDARG00000006526	ENSDART00000081570	1	15	15	GGCCTCAAAGCAGGTTTGACGTA	5	+	2008	7467
ENSDARG00000006526	ENSDART00000081570	1	16	16	CCCAGCCTCGACAAGTAGTGGAC	5	+	2135	7467
ENSDARG00000006526	ENSDART00000081570	1	16	16	CACCCAGCCTCGACAAGTAGTGGAC	7	+	2133	7467
ENSDARG00000006526	ENSDART00000081570	1	25	25	AAAAACCACCTGGAGAGTGAGCC	5	+	3751	7467
ENSDARG00000006526	ENSDART00000081570	1	26	26	GTATCCACCATTACAGACGAGGCG	6	+	4012	7467
ENSDARG00000006526	ENSDART00000081570	1	28	28	GCCAAATACAGAGTATCTGGTGAA	6	+	4272	7467
ENSDARG00000006526	ENSDART00000081570	1	29	29	GTTATCAACCAACAAGTGGTGGGC	6	+	4457	7467
ENSDARG00000006526	ENSDART00000081570	1	29	29	GTTATCAACCAACAAGTGGTGGGCG	7	+	4457	7467
ENSDARG00000006526	ENSDART00000081570	1	29	29	TTATCAACCAACAAGTGGTGGGC	5	+	4458	7467
ENSDARG00000006526	ENSDART00000081570	1	29	29	TTATCAACCAACAAGTGGTGGGCG	6	+	4458	7467
ENSDARG00000006526	ENSDART00000081570	1	29	29	AGAAACTACTTCACGCTGGTGAA	5	+	4510	7467
ENSDARG00000006526	ENSDART00000081570	1	31	31	GCCACCATCCAGGGTCTGCGGCC	5	+	4777	7467
ENSDARG00000006526	ENSDART00000081570	1	32	32	TGCGTCGCCATCAGATTTAGATGTT	7	+	4905	7467
ENSDARG00000006526	ENSDART00000081570	1	34	34	GTACCAACCTGCCTTAAGTGGAC	5	+	5310	7467
ENSDARG00000006526	ENSDART00000081570	1	34	34	ACCTCCTACAGGGTTCTGTATTC	5	+	5263	7467
ENSDARG00000006526	ENSDART00000081570	1	35	35	CAAGTCTTAGTGCCTGGGCTTGT	5	+	5611	7467
ENSDARG00000006526	ENSDART00000081570	1	37	37	AGCCACGCCCAAAAATGGAGGTTAC	7	+	5829	7467
ENSDARG00000006526	ENSDART00000081570	1	40	40	ACAGCCACAACTCGTAAGTATTT	5	+	6262	7467
ENSDARG00000006526	ENSDART00000081570	1	40	40	CACAGCCACAACTCGTAAGTATTT	6	+	6261	7467
ENSDARG00000006526	ENSDART00000081570	1	41	41	GCCTGCCCAGTCATGGTGGCCGAG	6	+	6305	7467
ENSDARG00000006526	ENSDART00000081570	1	41	41	CACCCATCCAGATGAGAAGATGTT	6	+	6744	7467
ENSDARG00000006526	ENSDART00000081570	1	42	42	ACAAAATCCTAGAGGAAGTCGTC	5	+	6872	7467
ENSDARG00000006526	ENSDART00000081570	1	42	42	CACAAAATCCTAGAGGAAGTCGTC	6	+	6871	7467
ENSDARG00000006526	ENSDART00000081570	1	42	42	CACAACTGCCACTCTTATTGGTC	5	+	6792	7467
ENSDARG00000006526	ENSDART00000081570	1	42	42	GTCCTATAATGTCATTGTGGAGGCC	7	+	6828	7467
ENSDARG00000006526	ENSDART00000081570	1	42	42	GTCCTATAATGTCATTGTGGAGGC	6	+	6828	7467
ENSDARG00000006526	ENSDART00000081570	1	43	43	CACGGCCACTCACCACGATGTCGGA	7	+	6957	7467
ENSDARG00000006526	ENSDART00000081570	1	43	43	CACTCACCACGATGTCGGAGCGGAA	7	+	6963	7467
ENSDARG00000006526	ENSDART00000081570	1	46	46	AACTGCAGAAGGCCAGGTGCTGAG	6	+	7321	7467
ENSDARG00000006526	ENSDART00000081570	1	46	46	AACAACGGCCAAAGGGTGGTGAGTA	7	+	7378	7467
ENSDARG00000006526	ENSDART00000081570	1	46	46	AACAACGGCCAAAGGGTGGTGAG	5	+	7378	7467
ENSDARG00000006526	ENSDART00000103753	1	1	1	GTAAAAGACAAGCCCAGCAGCAGCA	7	+	95	2748
ENSDARG00000006526	ENSDART00000103753	1	5	5	GACTGCACATGTTTGGGAGAGGGA	6	+	622	2748
ENSDARG00000006526	ENSDART00000103753	1	7	7	GTCCTATTACAATGGCATGAGCT	5	+	939	2748
ENSDARG00000006526	ENSDART00000103753	1	10	10	TTATACAGCTCACGAGGAAGTCTGC	7	+	1386	2748
ENSDARG00000006526	ENSDART00000103753	1	15	15	GGCCTCAAAGCAGGTTTGACGTA	5	+	2008	2748
ENSDARG00000006526	ENSDART00000103753	1	15	15	ACACGCACACCATGGAAGGAGGT	5	+	1948	2748
ENSDARG00000006526	ENSDART00000103753	1	16	16	CACCCAGCCTCGACAAGTAGTGGAC	7	+	2133	2748
ENSDARG00000006526	ENSDART00000103753	1	16	16	CCCAGCCTCGACAAGTAGTGGAC	5	+	2135	2748
ENSDARG00000006526	ENSDART00000103754	1	1	1	GTAAAAGACAAGCCCAGCAGCAGCA	7	+	95	7212
ENSDARG00000006526	ENSDART00000103754	1	5	5	GACTGCACATGTTTGGGAGAGGGA	6	+	655	7212
ENSDARG00000006526	ENSDART00000103754	1	7	7	GTCCTATTACAATGGCATGAGCT	5	+	972	7212
ENSDARG00000006526	ENSDART00000103754	1	10	10	TTATACAGCTCACGAGGAAGTCTGC	7	+	1419	7212
ENSDARG00000006526	ENSDART00000103754	1	14	14	GGCCTCAAAGCAGGTTTGACGTA	5	+	2029	7212
ENSDARG00000006526	ENSDART00000103754	1	14	14	ACACGCACACCATGGAAGGAGGT	5	+	1969	7212
ENSDARG00000006526	ENSDART00000103754	1	15	15	CCCAGCCTCGACAAGTAGTGGAC	5	+	2156	7212
ENSDARG00000006526	ENSDART00000103754	1	15	15	CACCCAGCCTCGACAAGTAGTGGAC	7	+	2154	7212
ENSDARG00000006526	ENSDART00000103754	1	24	24	AAAAACCACCTGGAGAGTGAGCC	5	+	3763	7212
ENSDARG00000006526	ENSDART00000103754	1	27	27	GCCAAATACAGAGTATCTGGTGAA	6	+	4008	7212
ENSDARG00000006526	ENSDART00000103754	1	28	28	GTTATCAACCAACAAGTGGTGGGCG	7	+	4193	7212
ENSDARG00000006526	ENSDART00000103754	1	28	28	GTTATCAACCAACAAGTGGTGGGC	6	+	4193	7212
ENSDARG00000006526	ENSDART00000103754	1	28	28	TTATCAACCAACAAGTGGTGGGCG	6	+	4194	7212
ENSDARG00000006526	ENSDART00000103754	1	28	28	TTATCAACCAACAAGTGGTGGGC	5	+	4194	7212
ENSDARG00000006526	ENSDART00000103754	1	28	28	AGAAACTACTTCACGCTGGTGAA	5	+	4246	7212
ENSDARG00000006526	ENSDART00000103754	1	30	30	GCCACCATCCAGGGTCTGCGGCC	5	+	4513	7212
ENSDARG00000006526	ENSDART00000103754	1	31	31	TGCGTCGCCATCAGATTTAGATGTT	7	+	4641	7212
ENSDARG00000006526	ENSDART00000103754	1	33	33	GTACCAACCTGCCTTAAGTGGAC	5	+	5046	7212
ENSDARG00000006526	ENSDART00000103754	1	33	33	ACCTCCTACAGGGTTCTGTATTC	5	+	4999	7212
ENSDARG00000006526	ENSDART00000103754	1	34	34	CAAGTCTTAGTGCCTGGGCTTGT	5	+	5371	7212
ENSDARG00000006526	ENSDART00000103754	1	36	36	AGCCACGCCCAAAAATGGAGGTTAC	7	+	5589	7212
ENSDARG00000006526	ENSDART00000103754	1	40	40	CACCCATCCAGATGAGAAGATGTT	6	+	6495	7212
ENSDARG00000006526	ENSDART00000103754	1	40	40	GCCTGCCCAGTCATGGTGGCCGAG	6	+	6056	7212
ENSDARG00000006526	ENSDART00000103754	1	41	41	CACAACTGCCACTCTTATTGGTC	5	+	6543	7212
ENSDARG00000006526	ENSDART00000103754	1	41	41	GTCCTATAATGTCATTGTGGAGGCC	7	+	6579	7212
ENSDARG00000006526	ENSDART00000103754	1	41	41	GTCCTATAATGTCATTGTGGAGGC	6	+	6579	7212
ENSDARG00000006526	ENSDART00000103754	1	41	41	CACAAAATCCTAGAGGAAGTCGTC	6	+	6622	7212
ENSDARG00000006526	ENSDART00000103754	1	41	41	ACAAAATCCTAGAGGAAGTCGTC	5	+	6623	7212
ENSDARG00000006526	ENSDART00000103754	1	42	42	CACTCACCACGATGTCGGAGCGGAA	7	+	6714	7212
ENSDARG00000006526	ENSDART00000103754	1	42	42	CACGGCCACTCACCACGATGTCGGA	7	+	6708	7212
ENSDARG00000006526	ENSDART00000103754	1	45	45	AACAACGGCCAAAGGGTGGTGAGTA	7	+	7129	7212
ENSDARG00000006526	ENSDART00000103754	1	45	45	AACTGCAGAAGGCCAGGTGCTGAG	6	+	7072	7212
ENSDARG00000006526	ENSDART00000103754	1	45	45	AACAACGGCCAAAGGGTGGTGAG	5	+	7129	7212
ENSDARG00000006526	ENSDART00000103754	1	46	46	ATCCCAAAACCCAAGAGTGAAAC	5	+	7205	7212
ENSDARG00000006526	ENSDART00000103755	1	1	1	GTAAAAGACAAGCCCAGCAGCAGCA	7	+	95	7488
ENSDARG00000006526	ENSDART00000103755	1	5	5	GACTGCACATGTTTGGGAGAGGGA	6	+	655	7488
ENSDARG00000006526	ENSDART00000103755	1	7	7	GTCCTATTACAATGGCATGAGCT	5	+	972	7488
ENSDARG00000006526	ENSDART00000103755	1	10	10	TTATACAGCTCACGAGGAAGTCTGC	7	+	1419	7488
ENSDARG00000006526	ENSDART00000103755	1	14	14	ACACGCACACCATGGAAGGAGGT	5	+	1969	7488
ENSDARG00000006526	ENSDART00000103755	1	14	14	GGCCTCAAAGCAGGTTTGACGTA	5	+	2029	7488
ENSDARG00000006526	ENSDART00000103755	1	15	15	CACCCAGCCTCGACAAGTAGTGGAC	7	+	2154	7488
ENSDARG00000006526	ENSDART00000103755	1	15	15	CCCAGCCTCGACAAGTAGTGGAC	5	+	2156	7488
ENSDARG00000006526	ENSDART00000103755	1	24	24	AAAAACCACCTGGAGAGTGAGCC	5	+	3763	7488
ENSDARG00000006526	ENSDART00000103755	1	25	25	GTATCCACCATTACAGACGAGGCG	6	+	4024	7488
ENSDARG00000006526	ENSDART00000103755	1	27	27	GCCAAATACAGAGTATCTGGTGAA	6	+	4284	7488
ENSDARG00000006526	ENSDART00000103755	1	28	28	GTTATCAACCAACAAGTGGTGGGCG	7	+	4469	7488
ENSDARG00000006526	ENSDART00000103755	1	28	28	GTTATCAACCAACAAGTGGTGGGC	6	+	4469	7488
ENSDARG00000006526	ENSDART00000103755	1	28	28	AGAAACTACTTCACGCTGGTGAA	5	+	4522	7488
ENSDARG00000006526	ENSDART00000103755	1	28	28	TTATCAACCAACAAGTGGTGGGC	5	+	4470	7488
ENSDARG00000006526	ENSDART00000103755	1	28	28	TTATCAACCAACAAGTGGTGGGCG	6	+	4470	7488
ENSDARG00000006526	ENSDART00000103755	1	30	30	GCCACCATCCAGGGTCTGCGGCC	5	+	4789	7488
ENSDARG00000006526	ENSDART00000103755	1	31	31	TGCGTCGCCATCAGATTTAGATGTT	7	+	4917	7488
ENSDARG00000006526	ENSDART00000103755	1	33	33	GTACCAACCTGCCTTAAGTGGAC	5	+	5322	7488
ENSDARG00000006526	ENSDART00000103755	1	33	33	ACCTCCTACAGGGTTCTGTATTC	5	+	5275	7488
ENSDARG00000006526	ENSDART00000103755	1	34	34	CAAGTCTTAGTGCCTGGGCTTGT	5	+	5647	7488
ENSDARG00000006526	ENSDART00000103755	1	36	36	AGCCACGCCCAAAAATGGAGGTTAC	7	+	5865	7488
ENSDARG00000006526	ENSDART00000103755	1	40	40	CACCCATCCAGATGAGAAGATGTT	6	+	6771	7488
ENSDARG00000006526	ENSDART00000103755	1	40	40	GCCTGCCCAGTCATGGTGGCCGAG	6	+	6332	7488
ENSDARG00000006526	ENSDART00000103755	1	41	41	ACAAAATCCTAGAGGAAGTCGTC	5	+	6899	7488
ENSDARG00000006526	ENSDART00000103755	1	41	41	GTCCTATAATGTCATTGTGGAGGC	6	+	6855	7488
ENSDARG00000006526	ENSDART00000103755	1	41	41	GTCCTATAATGTCATTGTGGAGGCC	7	+	6855	7488
ENSDARG00000006526	ENSDART00000103755	1	41	41	CACAACTGCCACTCTTATTGGTC	5	+	6819	7488
ENSDARG00000006526	ENSDART00000103755	1	41	41	CACAAAATCCTAGAGGAAGTCGTC	6	+	6898	7488
ENSDARG00000006526	ENSDART00000103755	1	42	42	CACGGCCACTCACCACGATGTCGGA	7	+	6984	7488
ENSDARG00000006526	ENSDART00000103755	1	42	42	CACTCACCACGATGTCGGAGCGGAA	7	+	6990	7488
ENSDARG00000006526	ENSDART00000103755	1	45	45	AACAACGGCCAAAGGGTGGTGAGTA	7	+	7405	7488
ENSDARG00000006526	ENSDART00000103755	1	45	45	AACTGCAGAAGGCCAGGTGCTGAG	6	+	7348	7488
ENSDARG00000006526	ENSDART00000103755	1	45	45	AACAACGGCCAAAGGGTGGTGAG	5	+	7405	7488
ENSDARG00000006526	ENSDART00000103755	1	46	46	ATCCCAAAACCCAAGAGTGAAAC	5	+	7481	7488
ENSDARG00000006588	ENSDART00000034549	1	4	3	CAACTACACATTCATCTGGAGCC	5	+	254	1311
ENSDARG00000006588	ENSDART00000034549	1	4	3	AACTACATCTACAGCTGTGACTAC	6	+	198	1311
ENSDARG00000006588	ENSDART00000034549	1	4	3	AACAGCTTCCACTGCATCTGGAGCC	7	+	441	1311
ENSDARG00000006588	ENSDART00000034549	1	4	3	AACAGCTTCCACTGCATCTGGAGCC	7	+	414	1311
ENSDARG00000006588	ENSDART00000034549	1	4	3	AACAGCTTCCACTGCATCTGGAGCC	7	+	387	1311
ENSDARG00000006588	ENSDART00000034549	1	4	3	AACAGCTTCCACTGCATCTGGAGCC	7	+	360	1311
ENSDARG00000006588	ENSDART00000034549	1	4	3	AACAGCTTCAACTGCATCTGGAGCC	7	+	279	1311
ENSDARG00000006588	ENSDART00000034549	1	4	3	AACAGCTTCAACCGCATCTGGAGCT	7	+	306	1311
ENSDARG00000006588	ENSDART00000034549	1	4	3	AACAGCTTCAACCGCATCTGGAGCC	7	+	333	1311
ENSDARG00000006588	ENSDART00000034549	1	4	3	TGCAACTACACATTCATCTGGAGCC	7	+	252	1311
ENSDARG00000006588	ENSDART00000034549	1	6	5	ACATCCATCACTACTGTGGACGGT	6	+	817	1311
ENSDARG00000006588	ENSDART00000034549	1	7	6	ATCACCTTCAAAATGGCAGGTGTC	6	+	919	1311
ENSDARG00000006588	ENSDART00000034549	1	7	6	CAACTCTAAAGCAGGTAGTCTTC	5	+	966	1311
ENSDARG00000006588	ENSDART00000034549	1	7	6	ACCTTCAAAATGGCAGGTGTCTTT	6	+	922	1311
ENSDARG00000006588	ENSDART00000034549	1	10	9	GTATGCTAACAGCATTGTGGATGAC	7	+	1262	1311
ENSDARG00000006588	ENSDART00000101360	1	3	3	CAACAATTCTAAGAAGCTTTTGTT	6	+	125	1212
ENSDARG00000006588	ENSDART00000101360	1	3	3	CAATTCTAAGAAGCTTTTGTTTAA	6	+	128	1212
ENSDARG00000006588	ENSDART00000101360	1	4	4	CAACTACACATTCATCTGGAGCC	5	+	155	1212
ENSDARG00000006588	ENSDART00000101360	1	4	4	AACAGCTTCCACTGCATCTGGAGCC	7	+	342	1212
ENSDARG00000006588	ENSDART00000101360	1	4	4	AACAGCTTCCACTGCATCTGGAGCC	7	+	315	1212
ENSDARG00000006588	ENSDART00000101360	1	4	4	AACAGCTTCCACTGCATCTGGAGCC	7	+	288	1212
ENSDARG00000006588	ENSDART00000101360	1	4	4	AACAGCTTCAACCGCATCTGGAGCC	7	+	234	1212
ENSDARG00000006588	ENSDART00000101360	1	4	4	AACAGCTTCAACCGCATCTGGAGCT	7	+	207	1212
ENSDARG00000006588	ENSDART00000101360	1	4	4	AACAGCTTCAACTGCATCTGGAGCC	7	+	180	1212
ENSDARG00000006588	ENSDART00000101360	1	4	4	AACAGCTTCCACTGCATCTGGAGCC	7	+	261	1212
ENSDARG00000006588	ENSDART00000101360	1	6	6	ACATCCATCACTACTGTGGACGGT	6	+	718	1212
ENSDARG00000006588	ENSDART00000101360	1	7	7	ATCACCTTCAAAATGGCAGGTGTC	6	+	820	1212
ENSDARG00000006588	ENSDART00000101360	1	7	7	ACCTTCAAAATGGCAGGTGTCTTT	6	+	823	1212
ENSDARG00000006588	ENSDART00000101360	1	7	7	CAACTCTAAAGCAGGTAGTCTTC	5	+	867	1212
ENSDARG00000006588	ENSDART00000101360	1	10	10	GTATGCTAACAGCATTGTGGATGAC	7	+	1163	1212
ENSDARG00000006621	ENSDART00000006998	1	1	1	GCCTCCATCGTTTCCTTAGGGTCT	6	-	102	1071
ENSDARG00000006621	ENSDART00000006998	1	1	1	ATCTTCATCCGCCATATCTGAAGGT	7	-	258	1071
ENSDARG00000006621	ENSDART00000006998	1	1	1	ATCTGCAACGCTGAGTGAAGGTTTT	7	-	217	1071
ENSDARG00000006621	ENSDART00000006998	1	2	2	ACAATCCCCTTGCCTGTGGGCCGGC	7	-	569	1071
ENSDARG00000006621	ENSDART00000006998	1	2	2	GTCCAAGGCCTTCCGGGCAGCAGGT	7	-	609	1071
ENSDARG00000006621	ENSDART00000006998	1	3	3	TTCATCATCATATTGTTCTGTTGGC	7	-	690	1071
ENSDARG00000006621	ENSDART00000006998	1	3	3	GGCTCAAGAATGACTGGACGAGGGG	7	-	668	1071
ENSDARG00000006621	ENSDART00000006998	1	5	5	AACTCAATCTGCTTGCGTTTTTG	5	-	1018	1071
ENSDARG00000006621	ENSDART00000006998	1	5	5	GCATACCTCAACTCAATCTGCTTGC	7	-	1025	1071
ENSDARG00000006621	ENSDART00000006998	1	5	5	AACTCAATCTGCTTGCGTTTTTGTA	7	-	1016	1071
ENSDARG00000006621	ENSDART00000102335	1	1	1	ATCTTCATCCGCCATATCTGAAGGT	7	-	258	1536
ENSDARG00000006621	ENSDART00000102335	1	1	1	GCCTCCATCGTTTCCTTAGGGTCT	6	-	102	1536
ENSDARG00000006621	ENSDART00000102335	1	1	1	ATCTGCAACGCTGAGTGAAGGTTTT	7	-	217	1536
ENSDARG00000006621	ENSDART00000102335	1	2	2	ACAATCCCCTTGCCTGTGGGCCGGC	7	-	569	1536
ENSDARG00000006621	ENSDART00000102335	1	2	2	GTCCAAGGCCTTCCGGGCAGCAGGT	7	-	609	1536
ENSDARG00000006621	ENSDART00000102335	1	3	3	TTCATCATCATATTGTTCTGTTGGC	7	-	690	1536
ENSDARG00000006621	ENSDART00000102335	1	3	3	GGCTCAAGAATGACTGGACGAGGGG	7	-	668	1536
ENSDARG00000006621	ENSDART00000102335	1	5	5	GCATACCTCAACTCAATCTGCTTGC	7	-	1025	1536
ENSDARG00000006621	ENSDART00000102335	1	5	5	AACTCAATCTGCTTGCGTTTTTGTA	7	-	1016	1536
ENSDARG00000006621	ENSDART00000102335	1	5	5	AACTCAATCTGCTTGCGTTTTTG	5	-	1018	1536
ENSDARG00000006621	ENSDART00000102335	1	9	9	CCCCAACCAGCATGGGTGAGTGT	5	-	1425	1536
ENSDARG00000006621	ENSDART00000102335	1	9	9	TGCCCCAACCAGCATGGGTGAGTGT	7	-	1425	1536
ENSDARG00000006621	ENSDART00000102335	1	9	9	TGCCCCAACCAGCATGGGTGAGTG	6	-	1426	1536
ENSDARG00000006621	ENSDART00000102335	1	9	9	ACCTGCCCCAACCAGCATGGGTG	5	-	1430	1536
ENSDARG00000006621	ENSDART00000102335	1	9	9	ATCTACGTCGTTTGTTGTTAGGCC	6	-	1520	1536
ENSDARG00000006621	ENSDART00000102335	1	9	9	GCCCCAACCAGCATGGGTGAGTGT	6	-	1425	1536
ENSDARG00000006621	ENSDART00000102335	1	9	9	GCCCCAACCAGCATGGGTGAGTG	5	-	1426	1536
ENSDARG00000007015	ENSDART00000014000	1	1	1	GTCCCACCAGCGCCGGCAGATTCT	6	-	38	1425
ENSDARG00000007015	ENSDART00000014000	1	2	2	GCAGGCGTCCGGAACAGGAGTCTTG	7	-	180	1425
ENSDARG00000007015	ENSDART00000014000	1	3	3	CTCAGCTCCTGCGGGTTCTGCTGGG	7	-	365	1425
ENSDARG00000007015	ENSDART00000014000	1	3	3	AGCTCCTGCGGGTTCTGCTGGGCA	6	-	363	1425
ENSDARG00000007015	ENSDART00000014000	1	4	4	GTCAGCAGCACCCGCAGGGGGCGAC	7	-	431	1425
ENSDARG00000007015	ENSDART00000014000	1	4	4	TGCAGCTGCTGATAGTGCTGGAGTG	7	-	548	1425
ENSDARG00000007015	ENSDART00000014000	1	6	6	GCCCACGCATGGGGAAGATGATGGA	7	-	821	1425
ENSDARG00000007015	ENSDART00000014000	1	6	6	TGCCCACGCATGGGGAAGATGAT	5	-	824	1425
ENSDARG00000007015	ENSDART00000014000	1	6	6	ACCTGCCCACGCATGGGGAAGAT	5	-	827	1425
ENSDARG00000007015	ENSDART00000014000	1	6	6	ACACACACCTGCCCACGCATGGGGA	7	-	831	1425
ENSDARG00000007015	ENSDART00000014000	1	7	7	GGCCTCGCCGGCGCTGCGTTTGGG	6	-	1141	1425
ENSDARG00000007015	ENSDART00000014000	1	7	7	GCCCCACCCCACGAGTAGGGGAA	5	-	982	1425
ENSDARG00000007015	ENSDART00000014000	1	7	7	TGCCGCCACGGCCCGCGCTGGAGTG	7	-	1051	1425
ENSDARG00000007015	ENSDART00000014000	1	7	7	GCAGACGGCTGAGCAGGAGCGTGC	6	-	1073	1425
ENSDARG00000007015	ENSDART00000014000	1	7	7	GACGCCCCACCCCACGAGTAGGGG	6	-	984	1425
ENSDARG00000007015	ENSDART00000014000	1	7	7	GAAGGCCTCGCCGGCGCTGCGTTT	6	-	1144	1425
ENSDARG00000007015	ENSDART00000014000	1	7	7	CTCGCCGGCGCTGCGTTTGGGGAA	6	-	1138	1425
ENSDARG00000007015	ENSDART00000014000	1	7	7	ACCAACACACTGCTCTGATGCTTAC	7	-	887	1425
ENSDARG00000007015	ENSDART00000014000	1	7	7	AGACGCCCCACCCCACGAGTAGGGG	7	-	984	1425
ENSDARG00000007015	ENSDART00000014000	1	7	7	AGCACCTGCAGGCTGAGCGGGTGCA	7	-	1094	1425
ENSDARG00000007015	ENSDART00000014000	1	7	7	CACCAACACACTGCTCTGATGCT	5	-	890	1425
ENSDARG00000007015	ENSDART00000014000	1	7	7	CCCACCCCACGAGTAGGGGAAGGT	6	-	979	1425
ENSDARG00000007015	ENSDART00000014000	1	7	7	CCCCACCCCACGAGTAGGGGAAGGT	7	-	979	1425
ENSDARG00000007015	ENSDART00000014000	1	7	7	CGCACCAACACACTGCTCTGATGCT	7	-	890	1425
ENSDARG00000007015	ENSDART00000014000	1	7	7	CGCCACGGCCCGCGCTGGAGTGGAC	7	-	1048	1425
ENSDARG00000007015	ENSDART00000014000	1	7	7	CGCCCCACCCCACGAGTAGGGGAA	6	-	982	1425
ENSDARG00000007015	ENSDART00000014000	1	7	7	CTCGCCGGCGCTGCGTTTGGGGA	5	-	1139	1425
ENSDARG00000007015	ENSDART00000014000	1	8	8	TACAGCACCTGCTGGCCGTTGTT	5	-	1339	1425
ENSDARG00000007289	ENSDART00000018758	1	2	2	GTCTCACGCGCGGGATGTGGAGCA	6	+	117	867
ENSDARG00000007289	ENSDART00000018758	1	2	2	GTATCCCACCGGAGCGGTGATGGT	6	+	180	867
ENSDARG00000007289	ENSDART00000018758	1	2	2	CGCTGCTTCAGTCTGCAGGAGGG	5	+	352	867
ENSDARG00000007289	ENSDART00000018758	1	4	4	GACTCCTGCAGGCCGTGTGCAGAT	6	+	484	867
ENSDARG00000007289	ENSDART00000018758	1	5	5	TTATCAAGCGGCTCGGGACGCAGGA	7	+	825	867
ENSDARG00000007289	ENSDART00000073940	1	2	2	GTCTCACGCGCGGGATGTGGAGCA	6	+	66	843
ENSDARG00000007289	ENSDART00000073940	1	2	2	GTATCCCACCGGAGCGGTGATGGT	6	+	129	843
ENSDARG00000007289	ENSDART00000073940	1	2	2	CGCTGCTTCAGTCTGCAGGAGGG	5	+	301	843
ENSDARG00000007289	ENSDART00000073940	1	4	4	CAACACAAAAGCGCAGGCAGATAAC	7	+	405	843
ENSDARG00000007289	ENSDART00000073940	1	5	5	GACTCCTGCAGGCCGTGTGCAGAT	6	+	460	843
ENSDARG00000007289	ENSDART00000073940	1	6	6	TTATCAAGCGGCTCGGGACGCAGGA	7	+	801	843
ENSDARG00000007356	ENSDART00000013024	1	1	1	CTCCAAGCCGTGAGAGAAGCTGCC	6	-	34	624
ENSDARG00000007356	ENSDART00000013024	1	1	1	CGCACCAGAGTCCCCGGGGGGCGTG	7	-	87	624
ENSDARG00000007356	ENSDART00000013024	1	1	1	AGCTGCCCACCAGCTCGCCGACTGC	7	-	16	624
ENSDARG00000007356	ENSDART00000013024	1	1	1	AGATGCGTCAGGTCCGGTGAAGTG	6	-	156	624
ENSDARG00000007356	ENSDART00000013024	1	1	1	AGAGTCCCCGGGGGGCGTGAGGA	5	-	83	624
ENSDARG00000007356	ENSDART00000013024	1	3	3	GACGTCCCATCTTTGTTGAGGGC	5	-	502	624
ENSDARG00000007387	ENSDART00000024945	1	2	1	TGCTCCTCCAACCAGGGGCGCATTC	7	-	29	420
ENSDARG00000007387	ENSDART00000024945	1	3	2	CAAATCCCATCCATGTCTGGCTGC	6	-	130	420
ENSDARG00000007387	ENSDART00000024945	1	3	2	ATCCCATCCATGTCTGGCTGCGTGC	7	-	126	420
ENSDARG00000007443	ENSDART00000030081	1	3	3	GCCTCAACCTGCGGGGATGCGGTC	6	+	1037	2160
ENSDARG00000007443	ENSDART00000030081	1	3	3	GGCTGCTACTGGCTGGCCGGCTCT	6	+	298	2160
ENSDARG00000007443	ENSDART00000030081	1	3	3	GTCACCCGCTGTAAGTCTTTGGT	5	+	334	2160
ENSDARG00000007443	ENSDART00000030081	1	3	3	GTCACCCGCTGTAAGTCTTTGGTC	6	+	334	2160
ENSDARG00000007443	ENSDART00000030081	1	3	3	GTTAGCTGCTTTAGGTGGGATGAA	6	+	1593	2160
ENSDARG00000007443	ENSDART00000030081	1	3	3	GTTCGCCTCTCGCATCTGCTGAG	5	+	391	2160
ENSDARG00000007443	ENSDART00000030081	1	3	3	GTTCGCCTCTCGCATCTGCTGAGCT	7	+	391	2160
ENSDARG00000007443	ENSDART00000030081	1	3	3	GTTGACTCCTTCCTATGGCGTGGTT	7	+	531	2160
ENSDARG00000007443	ENSDART00000030081	1	3	3	TCCACCAGCTGAGCGCAGAGGGT	5	+	467	2160
ENSDARG00000007443	ENSDART00000030081	1	3	3	TCCTACAGCGTTGGAGATGGGGAG	6	+	1570	2160
ENSDARG00000007443	ENSDART00000030081	1	3	3	GCCGGCGGCTGTGCGCAGCTGAT	5	+	619	2160
ENSDARG00000007443	ENSDART00000030081	1	3	3	GCAAACGACGATGCTGTGAAGCA	5	+	229	2160
ENSDARG00000007443	ENSDART00000030081	1	3	3	GACTCCTTCCTATGGCGTGGTTC	5	+	534	2160
ENSDARG00000007443	ENSDART00000030081	1	3	3	AGCCTCAACCTGCGGGGATGCGGTC	7	+	1036	2160
ENSDARG00000007443	ENSDART00000030081	1	3	3	AGCGTCAAAGCACTTGCTGAATGT	6	+	1114	2160
ENSDARG00000007443	ENSDART00000030081	1	3	3	AGCTTCCACGTACATGGTTGGAC	5	+	884	2160
ENSDARG00000007443	ENSDART00000030081	1	3	3	ACCCACATCTGAAATCGCAGTGGGT	7	+	1389	2160
ENSDARG00000007443	ENSDART00000030081	1	3	3	CCCTGCTGCAGTGCCCTGCGGCGCC	7	+	556	2160
ENSDARG00000007443	ENSDART00000030081	1	3	3	CGCCTCGCACCCGGTGAAGTCAAC	6	+	694	2160
ENSDARG00000007443	ENSDART00000030081	1	3	3	CTACACGCAGGCCCTGCTGGAGGC	6	+	1749	2160
ENSDARG00000007443	ENSDART00000030081	1	3	3	GAAGTCAACCGTACTCTGTTGGC	5	+	709	2160
ENSDARG00000007443	ENSDART00000030081	1	3	3	ACACAAGTCAGGGACTTAAGGTGAG	7	+	1786	2160
ENSDARG00000007443	ENSDART00000030081	1	4	4	TGCGGCGTCTGTGTTTAGTTTCT	5	+	1871	2160
ENSDARG00000007443	ENSDART00000030081	1	4	4	GTCAGCTGCGGCGTCTGTGTTTAG	6	+	1865	2160
ENSDARG00000007443	ENSDART00000030081	1	4	4	AGCTGCGGCGTCTGTGTTTAGTTT	6	+	1868	2160
ENSDARG00000007443	ENSDART00000030081	1	4	4	TTCCAACCCGCCGCTGTGACGGC	5	+	1906	2160
ENSDARG00000007443	ENSDART00000030081	1	5	5	TTAAAAGTCGTGTTGCTGAAGAG	5	+	2135	2160
ENSDARG00000007443	ENSDART00000103644	1	3	3	GCCTCAACCTGCGGGGATGCGGTC	6	+	1034	2157
ENSDARG00000007443	ENSDART00000103644	1	3	3	GGCTGCTACTGGCTGGCCGGCTCT	6	+	295	2157
ENSDARG00000007443	ENSDART00000103644	1	3	3	GTCACCCGCTGTAAGTCTTTGGT	5	+	331	2157
ENSDARG00000007443	ENSDART00000103644	1	3	3	GTCACCCGCTGTAAGTCTTTGGTC	6	+	331	2157
ENSDARG00000007443	ENSDART00000103644	1	3	3	GTTAGCTGCTTTAGGTGGGATGAA	6	+	1590	2157
ENSDARG00000007443	ENSDART00000103644	1	3	3	GTTCGCCTCTCGCATCTGCTGAG	5	+	388	2157
ENSDARG00000007443	ENSDART00000103644	1	3	3	GTTCGCCTCTCGCATCTGCTGAGCT	7	+	388	2157
ENSDARG00000007443	ENSDART00000103644	1	3	3	GTTGACTCCTTCCTATGGCGTGGTT	7	+	528	2157
ENSDARG00000007443	ENSDART00000103644	1	3	3	TCCACCAGCTGAGCGCAGAGGGT	5	+	464	2157
ENSDARG00000007443	ENSDART00000103644	1	3	3	TCCTACAGCGTTGGAGATGGGGAG	6	+	1567	2157
ENSDARG00000007443	ENSDART00000103644	1	3	3	GCCGGCGGCTGTGCGCAGCTGAT	5	+	616	2157
ENSDARG00000007443	ENSDART00000103644	1	3	3	GCAAACGACGATGCTGTGAAGCA	5	+	226	2157
ENSDARG00000007443	ENSDART00000103644	1	3	3	GACTCCTTCCTATGGCGTGGTTC	5	+	531	2157
ENSDARG00000007443	ENSDART00000103644	1	3	3	ACACAAGTCAGGGACTTAAGGTGAG	7	+	1783	2157
ENSDARG00000007443	ENSDART00000103644	1	3	3	ACCCACATCTGAAATCGCAGTGGGT	7	+	1386	2157
ENSDARG00000007443	ENSDART00000103644	1	3	3	AGCCTCAACCTGCGGGGATGCGGTC	7	+	1033	2157
ENSDARG00000007443	ENSDART00000103644	1	3	3	AGCGTCAAAGCACTTGCTGAATGT	6	+	1111	2157
ENSDARG00000007443	ENSDART00000103644	1	3	3	AGCTTCCACGTACATGGTTGGAC	5	+	881	2157
ENSDARG00000007443	ENSDART00000103644	1	3	3	GAAGTCAACCGTACTCTGTTGGC	5	+	706	2157
ENSDARG00000007443	ENSDART00000103644	1	3	3	CCCTGCTGCAGTGCCCTGCGGCGCC	7	+	553	2157
ENSDARG00000007443	ENSDART00000103644	1	3	3	CGCCTCGCACCCGGTGAAGTCAAC	6	+	691	2157
ENSDARG00000007443	ENSDART00000103644	1	3	3	CTACACGCAGGCCCTGCTGGAGGC	6	+	1746	2157
ENSDARG00000007443	ENSDART00000103644	1	4	4	TTCCAACCCGCCGCTGTGACGGC	5	+	1903	2157
ENSDARG00000007443	ENSDART00000103644	1	4	4	TGCGGCGTCTGTGTTTAGTTTCT	5	+	1868	2157
ENSDARG00000007443	ENSDART00000103644	1	4	4	GTCAGCTGCGGCGTCTGTGTTTAG	6	+	1862	2157
ENSDARG00000007443	ENSDART00000103644	1	4	4	AGCTGCGGCGTCTGTGTTTAGTTT	6	+	1865	2157
ENSDARG00000007443	ENSDART00000103644	1	5	5	TTAAAAGTCGTGTTGCTGAAGAG	5	+	2132	2157
ENSDARG00000007477	ENSDART00000015323	1	2	1	TTCATCGACCTTGAGATGCTGCC	5	+	223	969
ENSDARG00000007477	ENSDART00000015323	1	3	2	ACCGACGGCTTCCATCTGGATTT	5	+	389	969
ENSDARG00000007477	ENSDART00000015323	1	3	2	AACGCCAACCCGCAAGAGGTATAA	6	+	460	969
ENSDARG00000007477	ENSDART00000015323	1	5	4	GTTTTCACATCGTTTCTGTGCCTGC	7	+	732	969
ENSDARG00000007477	ENSDART00000015323	1	5	4	TGCCCCAGAGGAGAGGGGCGAATAC	7	+	687	969
ENSDARG00000007477	ENSDART00000015323	1	6	5	AACATCAGCGAGGACTTTGTAGGC	6	+	913	969
ENSDARG00000007534	ENSDART00000021412	1	3	2	GTAAAACCCCTACAGGAGAATTT	5	+	89	930
ENSDARG00000007534	ENSDART00000021412	1	3	2	AGCTGCAGAGAACTTTTGAAGAA	5	+	133	930
ENSDARG00000007534	ENSDART00000021412	1	4	3	AGAAGCTGCAACAAATGACGACTAC	7	+	393	930
ENSDARG00000007534	ENSDART00000021412	1	5	4	AGCAAAAGACATTGCTGTGTGGCA	6	+	444	930
ENSDARG00000007534	ENSDART00000021412	1	5	4	GCAAAAGACATTGCTGTGTGGCA	5	+	445	930
ENSDARG00000007534	ENSDART00000021412	1	8	7	TGCCACAAATGGATACGGTGCATCT	7	+	876	930
ENSDARG00000007678	ENSDART00000033361	1	2	1	TTAACCCACCACGGTGGAGAATAA	6	-	36	1689
ENSDARG00000007678	ENSDART00000033361	1	2	1	GTTAACCCACCACGGTGGAGAATAA	7	-	36	1689
ENSDARG00000007678	ENSDART00000033361	1	3	2	CGCCAAACAAACCAATGCTGCTGCT	7	-	162	1689
ENSDARG00000007678	ENSDART00000033361	1	3	2	TGCAGCAGCAGTCAGCATTGGGC	5	-	255	1689
ENSDARG00000007678	ENSDART00000033361	1	4	3	GACTCACCAGTTTGTCGATGCCTGC	7	-	409	1689
ENSDARG00000007678	ENSDART00000033361	1	10	9	TGCATCTCCACGAGGGCTTTGTG	5	-	964	1689
ENSDARG00000007678	ENSDART00000033361	1	10	9	TCCTGCATCTCCACGAGGGCTTT	5	-	967	1689
ENSDARG00000007678	ENSDART00000033361	1	10	9	ATCTCACACCTTTGTCTTGGGGA	5	-	1028	1689
ENSDARG00000007678	ENSDART00000033361	1	13	12	TGCCACAGCTGTACAGGCTAGGCA	6	-	1352	1689
ENSDARG00000007678	ENSDART00000033361	1	13	12	AGACTAGCCTCACTGCCGTAGGT	5	-	1381	1689
ENSDARG00000007734	ENSDART00000027624	1	1	1	GTTTTCTTCCTATTGCAGACTCT	5	+	78	1104
ENSDARG00000007734	ENSDART00000027624	1	2	2	CTCACCCCATCTTCCAGGTGGATGT	7	+	164	1104
ENSDARG00000007734	ENSDART00000027624	1	2	2	CACCCCATCTTCCAGGTGGATGTA	6	+	166	1104
ENSDARG00000007734	ENSDART00000027624	1	2	2	CACCCCATCTTCCAGGTGGATGT	5	+	166	1104
ENSDARG00000007734	ENSDART00000027624	1	7	7	AAAAGCGCACCCAGGATGAAGTC	5	+	857	1104
ENSDARG00000007739	ENSDART00000006449	1	2	2	TTCATCCTCAGATGTTGGTGTCAAC	7	-	42	3075
ENSDARG00000007739	ENSDART00000006449	1	4	4	AACTTCACCCATTGTGGAGTTGTA	6	-	261	3075
ENSDARG00000007739	ENSDART00000006449	1	4	4	AACTTCACCCATTGTGGAGTTGTAG	7	-	260	3075
ENSDARG00000007739	ENSDART00000006449	1	4	4	GAAACCACCGAAGAGCTGTTTGC	5	-	287	3075
ENSDARG00000007739	ENSDART00000006449	1	7	7	GAAAAATGCAATGTTTTTTGTCTCT	7	-	720	3075
ENSDARG00000007739	ENSDART00000006449	1	7	7	AGATTCACCAGTGAGGGAAGAGTTG	7	-	651	3075
ENSDARG00000007739	ENSDART00000006449	1	8	8	CACAGCAGAGATGATGTGGATGAA	6	-	886	3075
ENSDARG00000007739	ENSDART00000006449	1	8	8	AGACACAGCAGAGATGATGTGGAT	6	-	889	3075
ENSDARG00000007739	ENSDART00000006449	1	9	9	GTTCCACTCTGGTTCTCTGTGGTG	6	-	1218	3075
ENSDARG00000007739	ENSDART00000006449	1	9	9	GAAGACGGCGCGATTGCAGAGGCC	6	-	1291	3075
ENSDARG00000007739	ENSDART00000006449	1	9	9	GTCTGCTTCATGAATCTGGCTGT	5	-	1196	3075
ENSDARG00000007739	ENSDART00000006449	1	11	11	TTCATCACCAGCAGGTGTTTAGTAC	7	-	1514	3075
ENSDARG00000007739	ENSDART00000006449	1	11	11	CCCTTCATCACCAGCAGGTGTTTAG	7	-	1517	3075
ENSDARG00000007739	ENSDART00000006449	1	16	16	AACAACGACAAACATGAGGAAGGG	6	-	2380	3075
ENSDARG00000007739	ENSDART00000006449	1	19	19	ACATACTTCATTCCCTGCTGCAGGA	7	-	2846	3075
ENSDARG00000007786	ENSDART00000009858	1	1	1	GTTGCCATCCTCGCGCTGCGTCGAA	7	-	156	921
ENSDARG00000007786	ENSDART00000009858	1	1	1	GTTCACAGACTCCGGGCATTTTGC	6	-	128	921
ENSDARG00000007786	ENSDART00000009858	1	3	3	GTTGGCCACTTTACAGAAGAGGAT	6	-	289	921
ENSDARG00000007786	ENSDART00000009858	1	7	7	AGCACCAGAGAGGGCAGCTGCTTTG	7	-	650	921
ENSDARG00000007786	ENSDART00000009858	1	8	8	GTTAAACTCTCGGATGATGTTTTC	6	-	754	921
ENSDARG00000007786	ENSDART00000009858	1	8	8	GGCCTCTCCAACTTCTCTTTGGTC	6	-	816	921
ENSDARG00000007786	ENSDART00000009858	1	8	8	TTCTTCTTCCGGGACGGTGGAAAAC	7	-	852	921
ENSDARG00000007786	ENSDART00000009858	1	8	8	TTCTTCTTCTTCCGGGACGGTGGA	6	-	856	921
ENSDARG00000008068	ENSDART00000005733	1	2	2	TTCTCCACCGGCCCCTTTGGTTTT	6	-	24	582
ENSDARG00000008068	ENSDART00000005733	1	4	4	ACAAGCATCTTGTCTGGTGTATTC	6	-	208	582
ENSDARG00000008068	ENSDART00000005733	1	5	5	TTCCCCATCAAACCGCTGAAGAT	5	-	248	582
ENSDARG00000008068	ENSDART00000005733	1	6	6	AGATGCTTAGCATTGATGATGTC	5	-	403	582
ENSDARG00000008068	ENSDART00000005733	1	7	7	GTTCTCTTCCTCCATGTGTGTATCT	7	-	531	582
ENSDARG00000008068	ENSDART00000005733	1	7	7	CTCATCTTAATGCAGGGCAGTTTCT	7	-	458	582
ENSDARG00000008115	ENSDART00000039664	1	6	6	AAACAATGCAATGCATTCTGGAGAA	7	-	534	6999
ENSDARG00000008115	ENSDART00000039664	1	6	6	TTATCAGGCAAGCCTTCTGCAGTC	6	-	603	6999
ENSDARG00000008115	ENSDART00000039664	1	6	6	CTCATCATCTCTTTGTTTGTGTTT	6	-	991	6999
ENSDARG00000008115	ENSDART00000039664	1	6	6	TACAGCAACATTTTCTTCTGGTTCT	7	-	828	6999
ENSDARG00000008115	ENSDART00000039664	1	6	6	CTCTTCTTCTCCTGGACTTGTTT	5	-	897	6999
ENSDARG00000008115	ENSDART00000039664	1	7	7	GTACACCGCAGCAATTGTTGCAGTC	7	-	6678	6999
ENSDARG00000008115	ENSDART00000039664	1	7	7	GTCCTCTTCATTAACGTTGGCTTC	6	-	3994	6999
ENSDARG00000008115	ENSDART00000039664	1	7	7	GTACAACCCACCAAGTGAGGTTGTT	7	-	6189	6999
ENSDARG00000008115	ENSDART00000039664	1	7	7	GCCATCTTCATTACGAGGCTGGA	5	-	4793	6999
ENSDARG00000008115	ENSDART00000039664	1	7	7	GCATGCACAAGTCTGGATGAGAA	5	-	6930	6999
ENSDARG00000008115	ENSDART00000039664	1	7	7	GCAAGCAGATGAATATGTGGGCTTC	7	-	3296	6999
ENSDARG00000008115	ENSDART00000039664	1	7	7	GACGTCCTCCGATTCAGGATTTTTG	7	-	4188	6999
ENSDARG00000008115	ENSDART00000039664	1	7	7	GACGACAAACTCCAGGTCGGTGAC	6	-	6634	6999
ENSDARG00000008115	ENSDART00000039664	1	7	7	GTCTCCACAGACAATTATGGGAT	5	-	6782	6999
ENSDARG00000008115	ENSDART00000039664	1	7	7	GTCTTCCTCTGGACCGACGTCTTC	6	-	4744	6999
ENSDARG00000008115	ENSDART00000039664	1	7	7	GTCTTCTCCCAATAGGCTGGAGAG	6	-	2967	6999
ENSDARG00000008115	ENSDART00000039664	1	7	7	TTCATCCTCTCCAACGAGGTTGTG	6	-	6258	6999
ENSDARG00000008115	ENSDART00000039664	1	7	7	TTCATCCCACCTGTTCTTGGGTC	5	-	5731	6999
ENSDARG00000008115	ENSDART00000039664	1	7	7	TTCAGCAACACACTTATGGGCAGAC	7	-	4163	6999
ENSDARG00000008115	ENSDART00000039664	1	7	7	TTCAAACTCCAACGTTAGAGGTC	5	-	4247	6999
ENSDARG00000008115	ENSDART00000039664	1	7	7	TGCTCCCTCGTTTCAGATGGCTGT	6	-	1991	6999
ENSDARG00000008115	ENSDART00000039664	1	7	7	TCCCCATCCTCCCGGAGCTGAGGAA	7	-	5057	6999
ENSDARG00000008115	ENSDART00000039664	1	7	7	TCCCACTGCAACTTGTATGGTGT	5	-	5798	6999
ENSDARG00000008115	ENSDART00000039664	1	7	7	TACACCGCAGCAATTGTTGCAGTC	6	-	6678	6999
ENSDARG00000008115	ENSDART00000039664	1	7	7	TACAACCCACCAAGTGAGGTTGTT	6	-	6189	6999
ENSDARG00000008115	ENSDART00000039664	1	7	7	GACCTCATCCTGTTCGTCGTCTTC	6	-	4762	6999
ENSDARG00000008115	ENSDART00000039664	1	7	7	GACAAACTCCAGGTCGGTGACGTG	6	-	6631	6999
ENSDARG00000008115	ENSDART00000039664	1	7	7	CAAATCCCACAAAGGCTTGAGTT	5	-	3665	6999
ENSDARG00000008115	ENSDART00000039664	1	7	7	ATCAACACAAAACAATCTGACGTT	6	-	2728	6999
ENSDARG00000008115	ENSDART00000039664	1	7	7	AGCCAATTCTGCAGGGATAGGTG	5	-	2051	6999
ENSDARG00000008115	ENSDART00000039664	1	7	7	AGCAAATCCCACAAAGGCTTGAGTT	7	-	3665	6999
ENSDARG00000008115	ENSDART00000039664	1	7	7	AGATTCTTCTGCCATCTTTGGTA	5	-	2859	6999
ENSDARG00000008115	ENSDART00000039664	1	7	7	ACCTCATCCTGTTCGTCGTCTTC	5	-	4762	6999
ENSDARG00000008115	ENSDART00000039664	1	7	7	ACAGGCTTCTTTCCTTGTGCAGGT	6	-	2589	6999
ENSDARG00000008115	ENSDART00000039664	1	7	7	ACAACCCACCAAGTGAGGTTGTT	5	-	6189	6999
ENSDARG00000008115	ENSDART00000039664	1	7	7	AAACTCGACACTCATCTGTGGCGCC	7	-	4839	6999
ENSDARG00000008115	ENSDART00000039664	1	7	7	AAACTCGACACTCATCTGTGGCG	5	-	4841	6999
ENSDARG00000008115	ENSDART00000039664	1	7	7	CAACACAAAACAATCTGACGTTGAA	7	-	2725	6999
ENSDARG00000008115	ENSDART00000039664	1	7	7	CAATGCATCACGTGGGCAGTCTTG	6	-	5605	6999
ENSDARG00000008115	ENSDART00000039664	1	7	7	GAACAACTCCAGAATGGGCTTTC	5	-	6833	6999
ENSDARG00000008115	ENSDART00000039664	1	7	7	ACACAAAACAATCTGACGTTGAA	5	-	2725	6999
ENSDARG00000008115	ENSDART00000039664	1	7	7	CTCTCCAACGAGGTTGTGATTTC	5	-	6253	6999
ENSDARG00000008115	ENSDART00000039664	1	7	7	CTCCACTTCACCAATGGGTTGTGC	6	-	3238	6999
ENSDARG00000008115	ENSDART00000039664	1	7	7	CTCCACTTCACCAATGGGTTGTG	5	-	3239	6999
ENSDARG00000008115	ENSDART00000039664	1	7	7	CTCCACAGACAATTATGGGATTCT	6	-	6779	6999
ENSDARG00000008115	ENSDART00000039664	1	7	7	CCCATCCTCCCGGAGCTGAGGAA	5	-	5057	6999
ENSDARG00000008115	ENSDART00000039664	1	7	7	CACTTCACCAATGGGTTGTGCAGGT	7	-	3234	6999
ENSDARG00000008115	ENSDART00000039664	1	7	7	CACAAAGGCTTGAGTTTTGATTTG	6	-	3657	6999
ENSDARG00000008115	ENSDART00000039664	1	7	7	CACAAAACAATCTGACGTTGAAGTA	7	-	2722	6999
ENSDARG00000008131	ENSDART00000010894	1	1	1	GGCAGCCGCAGCGGCAGCAGCCGCA	7	+	546	1020
ENSDARG00000008131	ENSDART00000010894	1	1	1	GGCAGCAGCCGCAATGATGCAGGA	6	+	558	1020
ENSDARG00000008131	ENSDART00000010894	1	1	1	GCAGCCGCAGCGGCAGCAGCCGCA	6	+	547	1020
ENSDARG00000008131	ENSDART00000010894	1	1	1	GCAGCCGCAATGATGCAGGAGGC	5	+	562	1020
ENSDARG00000008131	ENSDART00000010894	1	1	1	GCAAGCGCCTCGGGGCGGAGTGGAA	7	+	212	1020
ENSDARG00000008131	ENSDART00000010894	1	1	1	CTCGCCTTCAGGATATGGGGGGAT	6	+	735	1020
ENSDARG00000008131	ENSDART00000010894	1	1	1	CACCAAAACTCGAGTGTGGCGTC	5	+	772	1020
ENSDARG00000008131	ENSDART00000010894	1	1	1	AGCAGCCGCAATGATGCAGGAGGC	6	+	561	1020
ENSDARG00000008131	ENSDART00000010894	1	1	1	AACACCAAAACTCGAGTGTGGCGTC	7	+	770	1020
ENSDARG00000008279	ENSDART00000048191	1	3	3	GTCTACAGCTCTACAGTTGCCTTT	6	+	180	1317
ENSDARG00000008279	ENSDART00000048191	1	3	3	ACCTACAAAAGAACCTGGAGAAGTA	7	+	311	1317
ENSDARG00000008279	ENSDART00000048191	1	4	4	AAACAAACCGGATATTTGAAGAT	5	+	367	1317
ENSDARG00000008279	ENSDART00000048191	1	6	6	AGAATCCTCATGGATCTGGATGT	5	+	550	1317
ENSDARG00000008279	ENSDART00000048191	1	8	8	CGCAGCGCCGGCTGTGCTGCGTAC	6	+	892	1317
ENSDARG00000008279	ENSDART00000048191	1	8	8	GGCCAAGACTCGCAGCGCCGGCTGT	7	+	882	1317
ENSDARG00000008279	ENSDART00000048191	1	9	9	GACATCAGAGCCGACGTCTGGAGTC	7	+	964	1317
ENSDARG00000008279	ENSDART00000048191	1	9	9	AGAGCCGACGTCTGGAGTCTTGGCA	7	+	970	1317
ENSDARG00000008279	ENSDART00000048191	1	10	10	TGCTTCCTCTCAGCATGGGCTTTT	6	+	1091	1317
ENSDARG00000008287	ENSDART00000008244	1	1	1	TTACCCACAGTTGATGTGGCAGTG	6	-	51	1239
ENSDARG00000008287	ENSDART00000008244	1	2	2	CTCTGCCTCCTCACATGTTGAGCT	6	-	136	1239
ENSDARG00000008287	ENSDART00000008244	1	6	6	AAACTCCTCTCCATCAGCAGCTGAA	7	-	663	1239
ENSDARG00000008287	ENSDART00000008244	1	9	9	AGCTCAGCCACCTTATGCAGCTGCT	7	-	938	1239
ENSDARG00000008287	ENSDART00000008244	1	9	9	CTCAGCCACCTTATGCAGCTGCT	5	-	938	1239
ENSDARG00000008287	ENSDART00000008244	1	11	11	TTCTTCTGCTTTTCTTTGACTCT	5	-	1094	1239
ENSDARG00000008287	ENSDART00000054662	1	1	1	TTCAGCCACCTGACCCTCTGGTTTG	7	-	3	1419
ENSDARG00000008287	ENSDART00000054662	1	2	2	TTACCCACAGTTGATGTGGCAGTG	6	-	153	1419
ENSDARG00000008287	ENSDART00000054662	1	3	3	CTCTGCCTCCTCACATGTTGAGCT	6	-	229	1419
ENSDARG00000008287	ENSDART00000054662	1	7	7	AAACTCCTCTCCATCAGCAGCTGAA	7	-	765	1419
ENSDARG00000008287	ENSDART00000054662	1	9	9	AGCTCAGCCACCTTATGCAGCTGCT	7	-	1097	1419
ENSDARG00000008287	ENSDART00000054662	1	9	9	CTCAGCCACCTTATGCAGCTGCT	5	-	1097	1419
ENSDARG00000008287	ENSDART00000054662	1	11	11	TTCTTCTGCTTTTCTTTGACTCT	5	-	1253	1419
ENSDARG00000008287	ENSDART00000054662	1	12	12	TTCTGCAGATGCTGGTTGTGGGT	5	-	1409	1419
ENSDARG00000008287	ENSDART00000054662	1	12	12	TTCTGCAGATGCTGGTTGTGGGTCT	7	-	1407	1419
ENSDARG00000008287	ENSDART00000054662	1	12	12	GCACTATTCTGCAGATGCTGGTTGT	7	-	1413	1419
ENSDARG00000008287	ENSDART00000082063	1	2	1	TTCAGCCACCTGACCCTCTGGTTTG	7	-	75	1497
ENSDARG00000008287	ENSDART00000082063	1	3	2	TTACCCACAGTTGATGTGGCAGTG	6	-	225	1497
ENSDARG00000008287	ENSDART00000082063	1	4	3	CTCTGCCTCCTCACATGTTGAGCT	6	-	301	1497
ENSDARG00000008287	ENSDART00000082063	1	9	8	AAACTCCTCTCCATCAGCAGCTGAA	7	-	840	1497
ENSDARG00000008287	ENSDART00000082063	1	11	10	CTCAGCCACCTTATGCAGCTGCT	5	-	1172	1497
ENSDARG00000008287	ENSDART00000082063	1	11	10	AGCTCAGCCACCTTATGCAGCTGCT	7	-	1172	1497
ENSDARG00000008287	ENSDART00000082063	1	13	12	TTCTTCTGCTTTTCTTTGACTCT	5	-	1328	1497
ENSDARG00000008287	ENSDART00000082063	1	14	13	TTCTGCAGATGCTGGTTGTGGGTCT	7	-	1482	1497
ENSDARG00000008287	ENSDART00000082063	1	14	13	TTCTGCAGATGCTGGTTGTGGGT	5	-	1484	1497
ENSDARG00000008287	ENSDART00000082063	1	14	13	GCACTATTCTGCAGATGCTGGTTGT	7	-	1488	1497
ENSDARG00000008305	ENSDART00000020409	1	1	1	AGCATCAACAGCGCCTTTGCAGAA	6	+	313	615
ENSDARG00000008305	ENSDART00000020409	1	1	1	CACGGCAAACCGAAAGGAGAGGCG	6	+	279	615
ENSDARG00000008305	ENSDART00000020409	1	1	1	GTTTCCCCACCACCCTGTGATGCA	6	+	27	615
ENSDARG00000008305	ENSDART00000020409	1	2	2	GGCCACAGCATGTTTGGGCATTG	5	+	590	615
ENSDARG00000008305	ENSDART00000020409	1	2	2	GTTGGCCACAGCATGTTTGGGCA	5	+	587	615
ENSDARG00000008413	ENSDART00000040284	1	2	2	GTAGGCTTCTGTTCCTGGTGGAGGC	7	-	66	3147
ENSDARG00000008413	ENSDART00000040284	1	5	5	GTTTACAGAGTTGTCCGCTTTGTGC	7	-	324	3147
ENSDARG00000008413	ENSDART00000040284	1	6	6	CTCTCCATCTAAGCTGGCTGTCGTG	7	-	504	3147
ENSDARG00000008413	ENSDART00000040284	1	7	7	TCCACCTCCTCTGCTGTGCTGAA	5	-	571	3147
ENSDARG00000008413	ENSDART00000040284	1	7	7	GTCCACCTCCTCTGCTGTGCTGAA	6	-	571	3147
ENSDARG00000008413	ENSDART00000040284	1	7	7	CTCCTCTGCTGTGCTGAAGGCTTT	6	-	565	3147
ENSDARG00000008413	ENSDART00000040284	1	7	7	CACCTCCTCTGCTGTGCTGAAGGC	6	-	568	3147
ENSDARG00000008413	ENSDART00000040284	1	11	11	ACATACTACATGTCGTTGCCTCT	5	-	977	3147
ENSDARG00000008413	ENSDART00000040284	1	11	11	CTCTCAGACTCAGTCCTCTGGTTGT	7	-	956	3147
ENSDARG00000008413	ENSDART00000040284	1	12	12	CTCCTCATCAAACATGTCGTCGTC	6	-	1114	3147
ENSDARG00000008413	ENSDART00000040284	1	14	14	ACCAGCGCAACCTCGTCTGGGGA	5	-	1495	3147
ENSDARG00000008413	ENSDART00000040284	1	14	14	GTATTCCTCTCTTAATGCCGTCGAC	7	-	1435	3147
ENSDARG00000008413	ENSDART00000040284	1	14	14	ACCAGCGCAACCTCGTCTGGGGAA	6	-	1494	3147
ENSDARG00000008413	ENSDART00000040284	1	14	14	CGCAACCTCGTCTGGGGAAGAGGAG	7	-	1488	3147
ENSDARG00000008413	ENSDART00000040284	1	15	15	TCCAGCAGCTCAAATCTGTGAAC	5	-	1525	3147
ENSDARG00000008413	ENSDART00000040284	1	19	19	AACAGCACATCGTGGAGACTTTGCT	7	-	2042	3147
ENSDARG00000008413	ENSDART00000040284	1	20	20	GACAGCAGAGTACAGCGCTGCAGTT	7	-	2272	3147
ENSDARG00000008413	ENSDART00000040284	1	22	22	AGCATCTTCTTCAGGTGTTTGAA	5	-	2485	3147
ENSDARG00000008413	ENSDART00000040284	1	25	25	AGAAACGTCCAGTAGATGAAGGT	5	-	2794	3147
ENSDARG00000008413	ENSDART00000040284	1	26	26	TGCCTCCCCAGAGCAGGGAGAAGAT	7	-	2968	3147
ENSDARG00000008413	ENSDART00000040284	1	26	26	GCCTCCCCAGAGCAGGGAGAAGAT	6	-	2968	3147
ENSDARG00000008413	ENSDART00000040284	1	26	26	CTCCCCAGAGCAGGGAGAAGATGAC	7	-	2965	3147
ENSDARG00000008413	ENSDART00000040284	1	27	27	TTCTTCAGCACATCAGGCAGCAAAC	7	-	3095	3147
ENSDARG00000008413	ENSDART00000040284	1	27	27	TACATCCTCTGATAGTTGAGGAA	5	-	3004	3147
ENSDARG00000008413	ENSDART00000040284	1	27	27	GGCAGCAAACTGACGATAATGAGCA	7	-	3080	3147
ENSDARG00000008457	ENSDART00000037553	1	1	1	CACCACAGCTCTAAGCAGGCGAC	5	-	41	1596
ENSDARG00000008457	ENSDART00000037553	1	1	1	CACACCACAGCTCTAAGCAGGCGAC	7	-	41	1596
ENSDARG00000008457	ENSDART00000037553	1	1	1	ATCCACACCACAGCTCTAAGCAGGC	7	-	44	1596
ENSDARG00000008457	ENSDART00000037553	1	1	1	AGCTGCATCGCTGAAAGCAGCAGAA	7	-	146	1596
ENSDARG00000008457	ENSDART00000037553	1	3	3	AGCAGCCTCCTGGAGTGCTGCAGAA	7	-	282	1596
ENSDARG00000008457	ENSDART00000037553	1	5	5	TTCCTACCAACTGATGGCTTGTGT	6	-	729	1596
ENSDARG00000008457	ENSDART00000037553	1	6	6	GTACACAGAAATCCCATCTGCTGTC	7	-	785	1596
ENSDARG00000008457	ENSDART00000037553	1	6	6	CCCATCTGCTGTCCAGAGGCTGGA	6	-	774	1596
ENSDARG00000008457	ENSDART00000037553	1	6	6	GTCCTCCCATGATGCTTAGCATAG	6	-	845	1596
ENSDARG00000008457	ENSDART00000037553	1	7	7	ACCATCTTCTGTGCGTGCAGCAGCT	7	-	977	1596
ENSDARG00000008457	ENSDART00000037553	1	9	9	AAAATCCCAGAAACCATTTGAAGAG	7	-	1183	1596
ENSDARG00000008457	ENSDART00000037553	1	10	10	TGCTGCAGACTCTCCTTCTGCTGCA	7	-	1283	1596
ENSDARG00000008457	ENSDART00000037553	1	10	10	TCCTCCAGCTCCTGCTGCAGACTCT	7	-	1295	1596
ENSDARG00000008457	ENSDART00000037553	1	10	10	AGCTCCTCCAGCTCCTGCTGCAGAC	7	-	1298	1596
ENSDARG00000008457	ENSDART00000037553	1	11	11	AAAGCCTTCTCCAGGTAGAGGGC	5	-	1543	1596
ENSDARG00000008490	ENSDART00000010543	1	2	2	GAAATCAGCTCAGCGGTCTGAGTC	6	-	231	630
ENSDARG00000008490	ENSDART00000010543	1	2	2	AAACACGCCAAAGTTGCGCTGTT	5	-	167	630
ENSDARG00000008490	ENSDART00000010543	1	3	3	TTCCTCTTCAAACTCAGATGCGAAC	7	-	366	630
ENSDARG00000008637	ENSDART00000015251	1	1	1	ACCCCAAACATGATGCCGGTTGC	5	+	1	2652
ENSDARG00000008637	ENSDART00000015251	1	2	2	TACAGCTACAGCACTGAGGTCGGG	6	+	109	2652
ENSDARG00000008637	ENSDART00000015251	1	3	3	CTCAGCAGAAAGCATTCTGGGTAA	6	+	318	2652
ENSDARG00000008637	ENSDART00000015251	1	4	4	CTATGCCCAAAAAGCGGAGCCTGC	6	+	408	2652
ENSDARG00000008637	ENSDART00000015251	1	4	4	GTCAAAAACCTGAAGAGGGGTGT	5	+	436	2652
ENSDARG00000008637	ENSDART00000015251	1	6	6	GGCATCAGCGGGAAGTGTGCTGCT	6	+	628	2652
ENSDARG00000008637	ENSDART00000015251	1	7	7	ACCCTCAAAGCGATTGAGGCCGGA	6	+	772	2652
ENSDARG00000008637	ENSDART00000015251	1	7	7	GACAAATTCCTGTCTGTTGGAGTC	6	+	847	2652
ENSDARG00000008637	ENSDART00000015251	1	8	8	CGCAAATCCAGCAAGTCTGAGAT	5	+	1012	2652
ENSDARG00000008637	ENSDART00000015251	1	8	8	AACTCACTCTCTAAAGCAGAAGCA	6	+	955	2652
ENSDARG00000008637	ENSDART00000015251	1	9	9	GCAGACCTCAGCTGGTGGATGCA	5	+	1067	2652
ENSDARG00000008637	ENSDART00000015251	1	9	9	GACCTCAGCTGGTGGATGCAGTA	5	+	1070	2652
ENSDARG00000008637	ENSDART00000015251	1	9	9	AAAGACGGCTTGATTCTGCAGGA	5	+	1153	2652
ENSDARG00000008637	ENSDART00000015251	1	9	9	GTTTGCAGACCTCAGCTGGTGGA	5	+	1063	2652
ENSDARG00000008637	ENSDART00000015251	1	10	10	GGCAGCACAGAGATTAAGGAGTC	5	+	1261	2652
ENSDARG00000008637	ENSDART00000015251	1	12	12	TCCGTCTTACATGGAGGTGAAGAA	6	+	1656	2652
ENSDARG00000008637	ENSDART00000015251	1	15	15	AGCCACGCCGGATGAAGGAGAAGAA	7	+	2031	2652
ENSDARG00000008637	ENSDART00000015251	1	15	15	CGCAGCCACGCCGGATGAAGGAGAA	7	+	2028	2652
ENSDARG00000008637	ENSDART00000015251	1	17	17	GTAAGCGCCGGAGTGGAAGTCGGT	6	+	2392	2652
ENSDARG00000008637	ENSDART00000015251	1	17	17	TTCCTCGTCTGCATGCAGATGGA	5	+	2473	2652
ENSDARG00000008637	ENSDART00000015251	1	18	18	GTCCAAGCAGGAGAAGCTGCCAAC	6	+	2526	2652
ENSDARG00000008674	ENSDART00000002532	1	4	4	TCCTTCAGACTGCGGGGAGAAGAT	6	+	717	1413
ENSDARG00000008674	ENSDART00000002532	1	4	4	GACCTCTACTTGACATCTGATTTT	6	+	493	1413
ENSDARG00000008674	ENSDART00000002532	1	4	4	GAAGACGACGATGAAGGGGTGAGAA	7	+	1252	1413
ENSDARG00000008674	ENSDART00000002532	1	4	4	CTACACCCCTAGCGGAGAATGGGAT	7	+	531	1413
ENSDARG00000008674	ENSDART00000002532	1	5	5	TACAACACCCCCGTCGCAGAGGAA	6	+	1387	1413
ENSDARG00000008674	ENSDART00000002532	1	5	5	CTACAACACCCCCGTCGCAGAGGAA	7	+	1386	1413
ENSDARG00000008674	ENSDART00000002532	1	5	5	CCCGTCGCAGAGGAAGAGTGAGTC	6	+	1396	1413
ENSDARG00000008674	ENSDART00000002532	1	5	5	CAACACCCCCGTCGCAGAGGAAGAG	7	+	1389	1413
ENSDARG00000008674	ENSDART00000002532	1	5	5	AGCTACAACACCCCCGTCGCAGAG	6	+	1384	1413
ENSDARG00000008674	ENSDART00000002532	1	5	5	AACACCCCCGTCGCAGAGGAAGAG	6	+	1390	1413
ENSDARG00000008674	ENSDART00000054446	1	4	4	TCCTTCAGACTGCGGGGAGAAGAT	6	+	684	1383
ENSDARG00000008674	ENSDART00000054446	1	4	4	GACCTCTACTTGACATCTGATTTT	6	+	460	1383
ENSDARG00000008674	ENSDART00000054446	1	4	4	CTACACCCCTAGCGGAGAATGGGAT	7	+	498	1383
ENSDARG00000008674	ENSDART00000054446	1	4	4	GAAGACGACGATGAAGGGGTGAGAA	7	+	1219	1383
ENSDARG00000008674	ENSDART00000054446	1	5	5	CCCGTCGCAGAGGAAGAGTGAGTC	6	+	1363	1383
ENSDARG00000008674	ENSDART00000054446	1	5	5	AACACCCCCGTCGCAGAGGAAGAG	6	+	1357	1383
ENSDARG00000008674	ENSDART00000054446	1	5	5	TACAACACCCCCGTCGCAGAGGAA	6	+	1354	1383
ENSDARG00000008674	ENSDART00000054446	1	5	5	AGCTACAACACCCCCGTCGCAGAG	6	+	1351	1383
ENSDARG00000008674	ENSDART00000054446	1	5	5	CAACACCCCCGTCGCAGAGGAAGAG	7	+	1356	1383
ENSDARG00000008674	ENSDART00000054446	1	5	5	CTACAACACCCCCGTCGCAGAGGAA	7	+	1353	1383
ENSDARG00000008674	ENSDART00000054447	1	4	4	TCCTTCAGACTGCGGGGAGAAGAT	6	+	717	1422
ENSDARG00000008674	ENSDART00000054447	1	4	4	GAAGACGACGATGAAGGGGTGAGAA	7	+	1252	1422
ENSDARG00000008674	ENSDART00000054447	1	4	4	GACCTCTACTTGACATCTGATTTT	6	+	493	1422
ENSDARG00000008674	ENSDART00000054447	1	4	4	CTACACCCCTAGCGGAGAATGGGAT	7	+	531	1422
ENSDARG00000008674	ENSDART00000054447	1	5	5	TACAACACCCCCGTCGCAGAGGAA	6	+	1387	1422
ENSDARG00000008674	ENSDART00000054447	1	5	5	AGCTACAACACCCCCGTCGCAGAG	6	+	1384	1422
ENSDARG00000008674	ENSDART00000054447	1	5	5	CTACAACACCCCCGTCGCAGAGGAA	7	+	1386	1422
ENSDARG00000008674	ENSDART00000054447	1	5	5	CCCGTCGCAGAGGAAGAGTGAGTC	6	+	1396	1422
ENSDARG00000008674	ENSDART00000054447	1	5	5	CAACACCCCCGTCGCAGAGGAAGAG	7	+	1389	1422
ENSDARG00000008674	ENSDART00000054447	1	5	5	AACACCCCCGTCGCAGAGGAAGAG	6	+	1390	1422
ENSDARG00000008683	ENSDART00000018083	1	1	1	AGAATCACCAACATGCTGGAAAC	5	-	10	894
ENSDARG00000008683	ENSDART00000018083	1	2	2	ACCATCAGCACAATCTCTGAATAA	6	-	345	894
ENSDARG00000008683	ENSDART00000018083	1	3	3	GACTGCAGATTCACTTCTGTTGAG	6	-	396	894
ENSDARG00000008683	ENSDART00000018083	1	4	4	TTCCTCTTCTTCAGGATGAGGAA	5	-	529	894
ENSDARG00000008683	ENSDART00000018083	1	5	5	ACACACCTCAGTGTTCTGCTGCA	5	-	587	894
ENSDARG00000008683	ENSDART00000018083	1	5	5	ACACACACCTCAGTGTTCTGCTGCA	7	-	587	894
ENSDARG00000008683	ENSDART00000018083	1	5	5	TTCTGCTGCACATTCTGCAGAGGTA	7	-	572	894
ENSDARG00000008706	ENSDART00000010211	1	2	2	AGCAAAGACACCAGGAGGCGGCA	5	+	45	393
ENSDARG00000008706	ENSDART00000010211	1	3	3	TCCAACAGCAGCTCAGCGGCCTGT	6	+	293	393
ENSDARG00000008706	ENSDART00000010211	1	4	4	GAACCCAGAAGCCAAGGAGTTTGT	6	+	363	393
ENSDARG00000008706	ENSDART00000010211	1	4	4	GAACCCAGAAGCCAAGGAGTTTGTT	7	+	363	393
ENSDARG00000008723	ENSDART00000006211	1	1	1	CTCACCAGATGAAGTCGGTGCAGTG	7	-	151	2004
ENSDARG00000008723	ENSDART00000006211	1	1	1	TACTCACCAGATGAAGTCGGTGCA	6	-	154	2004
ENSDARG00000008723	ENSDART00000006211	1	3	3	AACAAACTCATGGCAGCGTTTGTG	6	-	220	2004
ENSDARG00000008723	ENSDART00000006211	1	4	4	ATCTCATCCCTTGGTGTATGAGGC	6	-	368	2004
ENSDARG00000008723	ENSDART00000006211	1	6	6	GTTCCAGACCGGATTGAGGCAGCC	6	-	646	2004
ENSDARG00000008723	ENSDART00000006211	1	7	7	CACACCTCCACATACAGGCGCCTGT	7	-	707	2004
ENSDARG00000008723	ENSDART00000006211	1	7	7	CACCTCCACATACAGGCGCCTGT	5	-	707	2004
ENSDARG00000008723	ENSDART00000006211	1	10	10	ACCATCGTCTGAAAGCAGGAGTG	5	-	1216	2004
ENSDARG00000008723	ENSDART00000006211	1	13	13	ACACACACCTCTGGGGCGATGTA	5	-	1516	2004
ENSDARG00000008723	ENSDART00000006211	1	13	13	TGCCACAGAAGGTTTTTGTTGTG	5	-	1485	2004
ENSDARG00000008723	ENSDART00000006211	1	15	15	TCCTCACCATCAAAAGGAGGCTAA	6	-	1608	2004
ENSDARG00000008723	ENSDART00000006211	1	15	15	ATCCTCACCATCAAAAGGAGGCTAA	7	-	1608	2004
ENSDARG00000008886	ENSDART00000008468	1	1	1	ACACGCGACCTGCTGGCAGCTGGA	6	-	184	789
ENSDARG00000008886	ENSDART00000008468	1	1	1	GTCCCATTCTCTGATGCTGGAGAG	6	-	215	789
ENSDARG00000008886	ENSDART00000008468	1	2	2	GACAGCAGCTGGGAGGTGCTGAA	5	-	463	789
ENSDARG00000008886	ENSDART00000008468	1	2	2	CGCGGCTTCCTGTTCGTCTTGTGC	6	-	432	789
ENSDARG00000008886	ENSDART00000008468	1	2	2	AGCGACAGCAGCTGGGAGGTGCT	5	-	466	789
ENSDARG00000008886	ENSDART00000100962	1	1	1	ACACGCGACCTGCTGGCAGCTGGA	6	-	172	747
ENSDARG00000008886	ENSDART00000100962	1	1	1	GTCCCATTCTCTGATGCTGGAGAG	6	-	203	747
ENSDARG00000008886	ENSDART00000100962	1	3	3	AGCGACAGCAGCTGGGAGGTGCT	5	-	424	747
ENSDARG00000008886	ENSDART00000100962	1	3	3	CGCGGCTTCCTGTTCGTCTTGTGC	6	-	390	747
[truncated: 11,377 more rows]
