# Supplementary material for: Rapid Mutation of Endogenous Zebrafish Genes Using Zinc Finger Nucleases Made by Oligomerized Pool ENgineering (OPEN)
Source: PLoS One. 2009 Feb 9;4(2):e4348. doi: 10.1371/journal.pone.0004348 (PMC2634973; doi:10.1371/journal.pone.0004348)
Supplement: Table S4 — Potential OPEN ZFN target sites in gene transcripts encoded on zebrafish chromosome 4. Data presented as described in the legend to Table S1. (2.05 MB XLS) [file pone.0004348.s004.xls]

## Sheet: Chromosome4
Gene ID	Transcript ID	Chromosome Number	Exon Number	Coding Exon Number	TargetSite	ZFN Spacer Length	Strand	ZFN Cleavage Site	Coding Sequence Length
ENSDARG00000000018	ENSDART00000000019	4	2	1	GACTTCATCTGTTCCAGTTGAATTG	7	-	186	1542
ENSDARG00000000018	ENSDART00000000019	4	2	1	GCAGCCAGATGTGCGGTGACTTC	5	-	205	1542
ENSDARG00000000018	ENSDART00000000019	4	2	1	ATCATCGTCAGGCGAGGAGGGCGAA	7	-	138	1542
ENSDARG00000000018	ENSDART00000000019	4	2	1	AGCATCATCGTCAGGCGAGGAGGGC	7	-	141	1542
ENSDARG00000000018	ENSDART00000000019	4	2	1	AGCAGCAGCCAGATGTGCGGTGAC	6	-	208	1542
ENSDARG00000000018	ENSDART00000000019	4	2	1	TGCACCTGCCCGACCTGCTGAGAG	6	-	69	1542
ENSDARG00000000018	ENSDART00000000019	4	2	1	ACCAGCAGCAGCCAGATGTGCGGTG	7	-	210	1542
ENSDARG00000000018	ENSDART00000000019	4	3	2	GTTGCCACAGCGGCAGCTGCTGCC	6	-	246	1542
ENSDARG00000000018	ENSDART00000000019	4	3	2	TACCTAAGCAGGCGCGTCTGTTGTC	7	-	326	1542
ENSDARG00000000018	ENSDART00000000019	4	5	4	GTTCTCCTCCACCAGGGGGTGCG	5	-	531	1542
ENSDARG00000000018	ENSDART00000000019	4	5	4	CTCCTCCACCAGGGGGTGCGTGTTC	7	-	526	1542
ENSDARG00000000018	ENSDART00000000019	4	5	4	CTCCTCCACCAGGGGGTGCGTGT	5	-	528	1542
ENSDARG00000000018	ENSDART00000000019	4	5	4	TTCTCCTCCACCAGGGGGTGCGTGT	7	-	528	1542
ENSDARG00000000018	ENSDART00000000019	4	7	6	TGCTGCTTATAGCAGTTTTTAAC	5	-	808	1542
ENSDARG00000000018	ENSDART00000000019	4	8	7	CTCTCCATCCGTCACTGTGGAGTAG	7	-	1056	1542
ENSDARG00000000018	ENSDART00000000019	4	8	7	CTCTCCATCCGTCACTGTGGAGTA	6	-	1057	1542
ENSDARG00000000018	ENSDART00000000019	4	9	8	ACAGCCTGCGTGGCCTCTGACGCT	6	-	1137	1542
ENSDARG00000000018	ENSDART00000000019	4	9	8	GTTTGCATCTCTTGCGAAGCTGCA	6	-	1185	1542
ENSDARG00000000018	ENSDART00000000019	4	9	8	AGAGGCCACAGCCTGCGTGGCCTCT	7	-	1143	1542
ENSDARG00000000018	ENSDART00000000019	4	10	9	TCCTCCGCCTTGAAGAGTCGCTTCT	7	-	1302	1542
ENSDARG00000000018	ENSDART00000000019	4	10	9	CGCTCCGACTGCAGCAGCCGTTTCT	7	-	1344	1542
ENSDARG00000000019	ENSDART00000000020	4	4	4	GTCAGCACCGTATGAAGGGGGCGTT	7	+	123	537
ENSDARG00000000019	ENSDART00000000020	4	5	5	ATCCAAACATCGATGAAGCGTAA	5	+	224	537
ENSDARG00000000019	ENSDART00000000020	4	8	8	TGCAACAGAGGAGGCTCTGAAGGA	6	+	441	537
ENSDARG00000001781	ENSDART00000023638	4	1	1	CTCAAATACCTGCTCTTTGTTTTC	6	+	58	762
ENSDARG00000001781	ENSDART00000023638	4	2	2	TCCTTCAGATGGGCGGTGGAGTG	5	+	89	762
ENSDARG00000001781	ENSDART00000023638	4	2	2	GTCACCGGCTTCTTAGGCTGCTGCG	7	+	229	762
ENSDARG00000001781	ENSDART00000023638	4	2	2	GGCTTCTTAGGCTGCTGCGCTGTC	6	+	235	762
ENSDARG00000001781	ENSDART00000023638	4	2	2	ACATCCTAATCCTGGCAGGAGGA	5	+	197	762
ENSDARG00000001781	ENSDART00000023638	4	3	3	TTCCTCATCGAGCTGGTGGCTGGA	6	+	313	762
ENSDARG00000001781	ENSDART00000023638	4	4	4	GAAAGCATCACTCAGTCTGTGGAC	6	+	430	762
ENSDARG00000001781	ENSDART00000023638	4	4	4	ACCGACTACAGCAGGATGTGAGGAA	7	+	452	762
ENSDARG00000001781	ENSDART00000023638	4	5	5	TCCAACATCTACAAAGTAGAGGTC	6	+	607	762
ENSDARG00000001781	ENSDART00000102443	4	1	1	GTCACCGGCTTCTTAGGCTGCTGCG	7	+	160	723
ENSDARG00000001781	ENSDART00000102443	4	1	1	GGCTTCTTAGGCTGCTGCGCTGTC	6	+	166	723
ENSDARG00000001781	ENSDART00000102443	4	1	1	TTCTCCTTCAGATGGGCGGTGGA	5	+	17	723
ENSDARG00000001781	ENSDART00000102443	4	1	1	TTCTCCTTCAGATGGGCGGTGGAG	6	+	17	723
ENSDARG00000001781	ENSDART00000102443	4	1	1	ACATCCTAATCCTGGCAGGAGGA	5	+	128	723
ENSDARG00000001781	ENSDART00000102443	4	1	1	TCCTTCAGATGGGCGGTGGAGTG	5	+	20	723
ENSDARG00000001781	ENSDART00000102443	4	2	2	TTCCTCATCGAGCTGGTGGCTGGA	6	+	244	723
ENSDARG00000001781	ENSDART00000102443	4	3	3	GAAAGCATCACTCAGTCTGTGGAC	6	+	361	723
ENSDARG00000001781	ENSDART00000102443	4	3	3	ACCGACTACAGCAGGATGTGAGGAA	7	+	383	723
ENSDARG00000001781	ENSDART00000102443	4	4	4	TCCAACATCTACAAAGTAGAGGTC	6	+	538	723
ENSDARG00000001912	ENSDART00000003420	4	4	1	GTACCCCTCGTGGGCCGCCGTTGGG	7	-	36	1254
ENSDARG00000001912	ENSDART00000003420	4	6	3	TGCGGCCTCTGGGTGGCCGGCGGA	6	-	653	1254
ENSDARG00000001912	ENSDART00000003420	4	6	3	TCCTGCGGCCTCTGGGTGGCCGGC	6	-	656	1254
ENSDARG00000001912	ENSDART00000003420	4	6	3	GGCGGCGTCCTGTATGAGGCCGAT	6	-	974	1254
ENSDARG00000001912	ENSDART00000003420	4	6	3	GACTCCTGCGGCCTCTGGGTGGCC	6	-	659	1254
ENSDARG00000001912	ENSDART00000003420	4	6	3	ACCTTCTGCGAGATCGTCGGTGGT	6	-	829	1254
ENSDARG00000001912	ENSDART00000003420	4	6	3	AAAGACAGACTCCTGCGGCCTCT	5	-	667	1254
ENSDARG00000001912	ENSDART00000003420	4	7	4	GAACTCCACATTGAAGGCAGTGTAG	7	-	1203	1254
ENSDARG00000001912	ENSDART00000003420	4	7	4	AACTCCACATTGAAGGCAGTGTAG	6	-	1203	1254
ENSDARG00000001912	ENSDART00000100902	4	1	1	GTACCCCTCGTGGGCCGCCGTTGGG	7	-	18	1140
ENSDARG00000001912	ENSDART00000100902	4	3	3	AAAGACAGACTCCTGCGGCCTCT	5	-	649	1140
ENSDARG00000001912	ENSDART00000100902	4	3	3	ACCTTCTGCGAGATCGTCGGTGGT	6	-	811	1140
ENSDARG00000001912	ENSDART00000100902	4	3	3	TCCTGCGGCCTCTGGGTGGCCGGC	6	-	638	1140
ENSDARG00000001912	ENSDART00000100902	4	3	3	GACTCCTGCGGCCTCTGGGTGGCC	6	-	641	1140
ENSDARG00000001912	ENSDART00000100902	4	3	3	TGCGGCCTCTGGGTGGCCGGCGGA	6	-	635	1140
ENSDARG00000001912	ENSDART00000100902	4	5	5	GAACTCCACATTGAAGGCAGTGTAG	7	-	1095	1140
ENSDARG00000001912	ENSDART00000100902	4	5	5	AACTCCACATTGAAGGCAGTGTAG	6	-	1095	1140
ENSDARG00000001912	ENSDART00000100905	4	3	3	TGCGGCCTCTGGGTGGCCGGCGGA	6	-	572	1134
ENSDARG00000001912	ENSDART00000100905	4	3	3	TCCTGCGGCCTCTGGGTGGCCGGC	6	-	575	1134
ENSDARG00000001912	ENSDART00000100905	4	3	3	GACTCCTGCGGCCTCTGGGTGGCC	6	-	578	1134
ENSDARG00000001912	ENSDART00000100905	4	3	3	AAAGACAGACTCCTGCGGCCTCT	5	-	586	1134
ENSDARG00000001912	ENSDART00000100905	4	4	4	GGCGGCGTCCTGTATGAGGCCGAT	6	-	722	1134
ENSDARG00000001912	ENSDART00000100905	4	9	9	GAACTCCACATTGAAGGCAGTGTAG	7	-	1083	1134
ENSDARG00000001912	ENSDART00000100905	4	9	9	AACTCCACATTGAAGGCAGTGTAG	6	-	1083	1134
ENSDARG00000001953	ENSDART00000003247	4	2	2	ACCATCACAATCACTGTTGGAGGG	6	-	117	1608
ENSDARG00000001953	ENSDART00000003247	4	3	3	TACAGCATCCTCATTGTCTGATTTG	7	-	282	1608
ENSDARG00000001953	ENSDART00000003247	4	3	3	TACAGCATCCTCATTGTCTGATTT	6	-	283	1608
ENSDARG00000001953	ENSDART00000003247	4	7	7	GAAGTCCTCCATGGCATCTGTCTTG	7	-	555	1608
ENSDARG00000001953	ENSDART00000003247	4	8	8	CTCCCAGTCTACCCTGGAGGTTGTG	7	-	793	1608
ENSDARG00000001953	ENSDART00000003247	4	8	8	CTCCCAGTCTACCCTGGAGGTTGT	6	-	794	1608
ENSDARG00000001953	ENSDART00000003247	4	8	8	ACCGACATCAATCACTTTGATGAA	6	-	652	1608
ENSDARG00000001953	ENSDART00000003247	4	8	8	ACATCAATCACTTTGATGAAGGA	5	-	649	1608
ENSDARG00000001953	ENSDART00000003247	4	9	9	GCATCAATCTCATTGAGGGCTTT	5	-	973	1608
ENSDARG00000001953	ENSDART00000003247	4	10	10	TACCTCTCCGGAAGGGTAGCGGTA	6	-	1081	1608
ENSDARG00000001953	ENSDART00000003247	4	14	14	GCCGGCATCACTTCTCTGATGAT	5	-	1465	1608
ENSDARG00000002128	ENSDART00000026509	4	2	2	CCCTCAGACTGGCGTGTGGTGAC	5	+	26	1632
ENSDARG00000002128	ENSDART00000026509	4	2	2	CCCCTCAGACTGGCGTGTGGTGAC	6	+	25	1632
ENSDARG00000002128	ENSDART00000026509	4	5	5	CAACTCTAAATTTCGGGGAGTTG	5	+	441	1632
ENSDARG00000002128	ENSDART00000026509	4	5	5	CAACTCTAAATTTCGGGGAGTTGAC	7	+	441	1632
ENSDARG00000002128	ENSDART00000026509	4	7	7	CAATCCTGCCAAGAAGAAGGTGGG	6	+	702	1632
ENSDARG00000002128	ENSDART00000026509	4	11	11	TTACCAGTCAGTGGTGGATTTGGCA	7	+	1137	1632
ENSDARG00000002128	ENSDART00000026509	4	11	11	TTACCAGTCAGTGGTGGATTTGGC	6	+	1137	1632
ENSDARG00000002128	ENSDART00000026509	4	12	12	AGCAGCAGATGGAGCTGATGGAGAT	7	+	1352	1632
ENSDARG00000002128	ENSDART00000026509	4	12	12	TTATCAGGCAGTGCCGGTGCCGAT	6	+	1275	1632
ENSDARG00000002128	ENSDART00000026509	4	13	13	AACTCCTTACTTCTATGTGGAGCT	6	+	1416	1632
ENSDARG00000002128	ENSDART00000026509	4	14	14	GGCCAAACAAGTACGCTCTGACTAC	7	+	1590	1632
ENSDARG00000002128	ENSDART00000026509	4	14	14	AAAATCAGCAGAGAGGAGGAAGAG	6	+	1561	1632
ENSDARG00000002131	ENSDART00000015119	4	4	4	GCACCATCCCATACAGATGAAGCC	6	+	357	1545
ENSDARG00000002131	ENSDART00000015119	4	4	4	TGCACCATCCCATACAGATGAAGCC	7	+	356	1545
ENSDARG00000002131	ENSDART00000015119	4	7	7	GGCTGCAGCAGCAGTTGGCGCAGCA	7	+	680	1545
ENSDARG00000002131	ENSDART00000015119	4	7	7	GTTGGCGCAGCAGATGCAGCAGTT	6	+	693	1545
ENSDARG00000002131	ENSDART00000015119	4	7	7	TGCAGCAGCAGTTGGCGCAGCAGAT	7	+	683	1545
ENSDARG00000002131	ENSDART00000015119	4	7	7	TGCTCCTCCCCCATGGTGGTGAA	5	+	622	1545
ENSDARG00000002131	ENSDART00000015119	4	7	7	TTCGCCGACACGCAGAAGGATAA	5	+	646	1545
ENSDARG00000002131	ENSDART00000015119	4	7	7	GGCGGCTGCAGCAGCAGTTGGCGCA	7	+	677	1545
ENSDARG00000002131	ENSDART00000015119	4	7	7	AACAGCGGCGGCTGCAGCAGCAGTT	7	+	671	1545
ENSDARG00000002131	ENSDART00000015119	4	7	7	CTCCTCCCCCATGGTGGTGAAGTT	6	+	624	1545
ENSDARG00000002131	ENSDART00000015119	4	7	7	AGCGGCGGCTGCAGCAGCAGTTGGC	7	+	674	1545
ENSDARG00000002131	ENSDART00000015119	4	7	7	TCCTCCCCCATGGTGGTGAAGTT	5	+	625	1545
ENSDARG00000002131	ENSDART00000015119	4	8	8	GTATTCAGCAAATGGCAGGTGAG	5	+	827	1545
ENSDARG00000002131	ENSDART00000015119	4	11	11	TGCAGCAACAGAGTGCTGCGGGC	5	+	1247	1545
ENSDARG00000002131	ENSDART00000015119	4	12	12	ACCACCTGCCACAGGAGTTTGGG	5	+	1313	1545
ENSDARG00000002131	ENSDART00000015119	4	12	12	ACCTGCCACAGGAGTTTGGGGAC	5	+	1316	1545
ENSDARG00000002131	ENSDART00000015119	4	12	12	ACCACCTGCCACAGGAGTTTGGGGA	7	+	1313	1545
ENSDARG00000002131	ENSDART00000015119	4	13	13	GCAGGCCGCCATTCAGGCGATGAA	6	+	1461	1545
ENSDARG00000002131	ENSDART00000017443	4	3	3	TGCACCATCCCATACAGATGAAGCC	7	+	299	1485
ENSDARG00000002131	ENSDART00000017443	4	3	3	GCACCATCCCATACAGATGAAGCC	6	+	300	1485
ENSDARG00000002131	ENSDART00000017443	4	6	6	TTCGCCGACACGCAGAAGGATAA	5	+	589	1485
ENSDARG00000002131	ENSDART00000017443	4	6	6	TGCTCCTCCCCCATGGTGGTGAA	5	+	565	1485
ENSDARG00000002131	ENSDART00000017443	4	6	6	TGCAGCAGCAGTTGGCGCAGCAGAT	7	+	626	1485
ENSDARG00000002131	ENSDART00000017443	4	6	6	TCCTCCCCCATGGTGGTGAAGTT	5	+	568	1485
ENSDARG00000002131	ENSDART00000017443	4	6	6	GTTGGCGCAGCAGATGCAGCAGTT	6	+	636	1485
ENSDARG00000002131	ENSDART00000017443	4	6	6	GGCTGCAGCAGCAGTTGGCGCAGCA	7	+	623	1485
ENSDARG00000002131	ENSDART00000017443	4	6	6	GGCGGCTGCAGCAGCAGTTGGCGCA	7	+	620	1485
ENSDARG00000002131	ENSDART00000017443	4	6	6	CTCCTCCCCCATGGTGGTGAAGTT	6	+	567	1485
ENSDARG00000002131	ENSDART00000017443	4	6	6	AGCGGCGGCTGCAGCAGCAGTTGGC	7	+	617	1485
ENSDARG00000002131	ENSDART00000017443	4	6	6	AACAGCGGCGGCTGCAGCAGCAGTT	7	+	614	1485
ENSDARG00000002131	ENSDART00000017443	4	7	7	GTATTCAGCAAATGGCAGGTGAG	5	+	770	1485
ENSDARG00000002131	ENSDART00000017443	4	10	10	TGCAGCAACAGAGTGCTGCGGGC	5	+	1190	1485
ENSDARG00000002131	ENSDART00000017443	4	11	11	ACCACCTGCCACAGGAGTTTGGG	5	+	1253	1485
ENSDARG00000002131	ENSDART00000017443	4	11	11	ACCACCTGCCACAGGAGTTTGGGGA	7	+	1253	1485
ENSDARG00000002131	ENSDART00000017443	4	11	11	ACCTGCCACAGGAGTTTGGGGAC	5	+	1256	1485
ENSDARG00000002131	ENSDART00000017443	4	12	12	GCAGGCCGCCATTCAGGCGATGAA	6	+	1401	1485
ENSDARG00000002131	ENSDART00000077926	4	4	4	TGCACCATCCCATACAGATGAAGCC	7	+	299	1410
ENSDARG00000002131	ENSDART00000077926	4	4	4	GCACCATCCCATACAGATGAAGCC	6	+	300	1410
ENSDARG00000002131	ENSDART00000077926	4	7	7	TGCTCCTCCCCCATGGTGGTGAA	5	+	565	1410
ENSDARG00000002131	ENSDART00000077926	4	7	7	TGCAGCAGCAGTTGGCGCAGCAGAT	7	+	626	1410
ENSDARG00000002131	ENSDART00000077926	4	7	7	TCCTCCCCCATGGTGGTGAAGTT	5	+	568	1410
ENSDARG00000002131	ENSDART00000077926	4	7	7	GTTGGCGCAGCAGATGCAGCAGTT	6	+	636	1410
ENSDARG00000002131	ENSDART00000077926	4	7	7	GGCTGCAGCAGCAGTTGGCGCAGCA	7	+	623	1410
ENSDARG00000002131	ENSDART00000077926	4	7	7	GGCGGCTGCAGCAGCAGTTGGCGCA	7	+	620	1410
ENSDARG00000002131	ENSDART00000077926	4	7	7	TTCGCCGACACGCAGAAGGATAA	5	+	589	1410
ENSDARG00000002131	ENSDART00000077926	4	7	7	ACAGCCAACGCAGCCGCCGCAGTC	6	+	763	1410
ENSDARG00000002131	ENSDART00000077926	4	7	7	CTCCTCCCCCATGGTGGTGAAGTT	6	+	567	1410
ENSDARG00000002131	ENSDART00000077926	4	7	7	AGCGGCGGCTGCAGCAGCAGTTGGC	7	+	617	1410
ENSDARG00000002131	ENSDART00000077926	4	7	7	AGCAGCACAGCCAACGCAGCCGCC	6	+	757	1410
ENSDARG00000002131	ENSDART00000077926	4	7	7	AACAGCGGCGGCTGCAGCAGCAGTT	7	+	614	1410
ENSDARG00000002131	ENSDART00000077926	4	8	8	GTATTCAGCAAATGGCAGGTGAG	5	+	830	1410
ENSDARG00000002131	ENSDART00000077926	4	10	10	TGCAGCAACAGAGTGCTGCGGGC	5	+	1115	1410
ENSDARG00000002131	ENSDART00000077926	4	11	11	ACCACCTGCCACAGGAGTTTGGG	5	+	1178	1410
ENSDARG00000002131	ENSDART00000077926	4	11	11	ACCTGCCACAGGAGTTTGGGGAC	5	+	1181	1410
ENSDARG00000002131	ENSDART00000077926	4	11	11	ACCACCTGCCACAGGAGTTTGGGGA	7	+	1178	1410
ENSDARG00000002131	ENSDART00000077926	4	12	12	GCAGGCCGCCATTCAGGCGATGAA	6	+	1326	1410
ENSDARG00000002131	ENSDART00000100395	4	2	2	TGCACCATCCCATACAGATGAAGCC	7	+	95	1194
ENSDARG00000002131	ENSDART00000100395	4	2	2	GCACCATCCCATACAGATGAAGCC	6	+	96	1194
ENSDARG00000002131	ENSDART00000100395	4	5	5	TGCAGCAGCAGTTGGCGCAGCAGAT	7	+	422	1194
ENSDARG00000002131	ENSDART00000100395	4	5	5	AACAGCGGCGGCTGCAGCAGCAGTT	7	+	410	1194
ENSDARG00000002131	ENSDART00000100395	4	5	5	TCCTCCCCCATGGTGGTGAAGTT	5	+	364	1194
ENSDARG00000002131	ENSDART00000100395	4	5	5	GGCTGCAGCAGCAGTTGGCGCAGCA	7	+	419	1194
ENSDARG00000002131	ENSDART00000100395	4	5	5	GGCGGCTGCAGCAGCAGTTGGCGCA	7	+	416	1194
ENSDARG00000002131	ENSDART00000100395	4	5	5	TGCTCCTCCCCCATGGTGGTGAA	5	+	361	1194
ENSDARG00000002131	ENSDART00000100395	4	5	5	CTCCTCCCCCATGGTGGTGAAGTT	6	+	363	1194
ENSDARG00000002131	ENSDART00000100395	4	5	5	AGCGGCGGCTGCAGCAGCAGTTGGC	7	+	413	1194
ENSDARG00000002131	ENSDART00000100395	4	5	5	TTCGCCGACACGCAGAAGGATAA	5	+	385	1194
ENSDARG00000002131	ENSDART00000100395	4	13	13	TGCAGCAACAGAGTGCTGCGGGC	5	+	896	1194
ENSDARG00000002131	ENSDART00000100395	4	14	14	ACCACCTGCCACAGGAGTTTGGGGA	7	+	965	1194
ENSDARG00000002131	ENSDART00000100395	4	14	14	ACCACCTGCCACAGGAGTTTGGG	5	+	965	1194
ENSDARG00000002131	ENSDART00000100395	4	14	14	ACCTGCCACAGGAGTTTGGGGAC	5	+	968	1194
ENSDARG00000002131	ENSDART00000100395	4	15	15	GCAGGCCGCCATTCAGGCGATGAA	6	+	1113	1194
ENSDARG00000002131	ENSDART00000100403	4	2	2	GCACCATCCCATACAGATGAAGCC	6	+	96	1305
ENSDARG00000002131	ENSDART00000100403	4	2	2	TGCACCATCCCATACAGATGAAGCC	7	+	95	1305
ENSDARG00000002131	ENSDART00000100403	4	5	5	GGCTGCAGCAGCAGTTGGCGCAGCA	7	+	419	1305
ENSDARG00000002131	ENSDART00000100403	4	5	5	TCCTCCCCCATGGTGGTGAAGTT	5	+	364	1305
ENSDARG00000002131	ENSDART00000100403	4	5	5	TGCAGCAGCAGTTGGCGCAGCAGAT	7	+	422	1305
ENSDARG00000002131	ENSDART00000100403	4	5	5	TGCTCCTCCCCCATGGTGGTGAA	5	+	361	1305
ENSDARG00000002131	ENSDART00000100403	4	5	5	TTCGCCGACACGCAGAAGGATAA	5	+	385	1305
ENSDARG00000002131	ENSDART00000100403	4	5	5	GGCGGCTGCAGCAGCAGTTGGCGCA	7	+	416	1305
ENSDARG00000002131	ENSDART00000100403	4	5	5	CTCCTCCCCCATGGTGGTGAAGTT	6	+	363	1305
ENSDARG00000002131	ENSDART00000100403	4	5	5	AGCGGCGGCTGCAGCAGCAGTTGGC	7	+	413	1305
ENSDARG00000002131	ENSDART00000100403	4	5	5	AACAGCGGCGGCTGCAGCAGCAGTT	7	+	410	1305
ENSDARG00000002131	ENSDART00000100403	4	9	9	GTATTCAGCAAATGGCAGGTGAG	5	+	536	1305
ENSDARG00000002131	ENSDART00000100403	4	18	18	TGCAGCAACAGAGTGCTGCGGGC	5	+	1007	1305
ENSDARG00000002131	ENSDART00000100403	4	19	19	ACCACCTGCCACAGGAGTTTGGG	5	+	1073	1305
ENSDARG00000002131	ENSDART00000100403	4	19	19	ACCACCTGCCACAGGAGTTTGGGGA	7	+	1073	1305
ENSDARG00000002131	ENSDART00000100403	4	19	19	ACCTGCCACAGGAGTTTGGGGAC	5	+	1076	1305
ENSDARG00000002131	ENSDART00000100403	4	20	20	GCAGGCCGCCATTCAGGCGATGAA	6	+	1221	1305
ENSDARG00000002131	ENSDART00000100416	4	1	1	GCACTCGTCTGAGCTGGGCTTTG	5	+	18	1452
ENSDARG00000002131	ENSDART00000100416	4	1	1	GCACTCGTCTGAGCTGGGCTTTGTG	7	+	18	1452
ENSDARG00000002131	ENSDART00000100416	4	4	4	TGCACCATCCCATACAGATGAAGCC	7	+	410	1452
ENSDARG00000002131	ENSDART00000100416	4	4	4	GCACCATCCCATACAGATGAAGCC	6	+	411	1452
ENSDARG00000002131	ENSDART00000100416	4	7	7	TTCGCCGACACGCAGAAGGATAA	5	+	700	1452
ENSDARG00000002131	ENSDART00000100416	4	7	7	TCCTCCCCCATGGTGGTGAAGTT	5	+	679	1452
ENSDARG00000002131	ENSDART00000100416	4	7	7	GGCTGCAGCAGCAGTTGGCGCAGCA	7	+	734	1452
ENSDARG00000002131	ENSDART00000100416	4	7	7	GGCGGCTGCAGCAGCAGTTGGCGCA	7	+	731	1452
ENSDARG00000002131	ENSDART00000100416	4	7	7	TGCAGCAGCAGTTGGCGCAGCAGAT	7	+	737	1452
ENSDARG00000002131	ENSDART00000100416	4	7	7	CTCCTCCCCCATGGTGGTGAAGTT	6	+	678	1452
ENSDARG00000002131	ENSDART00000100416	4	7	7	AACAGCGGCGGCTGCAGCAGCAGTT	7	+	725	1452
ENSDARG00000002131	ENSDART00000100416	4	7	7	GTTGGCGCAGCAGATGCAGCAGTT	6	+	747	1452
ENSDARG00000002131	ENSDART00000100416	4	7	7	AGCGGCGGCTGCAGCAGCAGTTGGC	7	+	728	1452
ENSDARG00000002131	ENSDART00000100416	4	7	7	TGCTCCTCCCCCATGGTGGTGAA	5	+	676	1452
ENSDARG00000002131	ENSDART00000100416	4	8	8	GTATTCAGCAAATGGCAGGTGAG	5	+	881	1452
ENSDARG00000002131	ENSDART00000100416	4	10	10	TGCAGCAACAGAGTGCTGCGGGC	5	+	1154	1452
ENSDARG00000002131	ENSDART00000100416	4	11	11	ACCACCTGCCACAGGAGTTTGGGGA	7	+	1220	1452
ENSDARG00000002131	ENSDART00000100416	4	11	11	ACCTGCCACAGGAGTTTGGGGAC	5	+	1223	1452
ENSDARG00000002131	ENSDART00000100416	4	11	11	ACCACCTGCCACAGGAGTTTGGG	5	+	1220	1452
ENSDARG00000002131	ENSDART00000100416	4	12	12	GCAGGCCGCCATTCAGGCGATGAA	6	+	1368	1452
ENSDARG00000002174	ENSDART00000013313	4	1	1	TCCTCACGCCATCTGTCTTGGAG	5	+	66	1308
ENSDARG00000002174	ENSDART00000013313	4	1	1	CACGCCATCTGTCTTGGAGATGCA	6	+	70	1308
ENSDARG00000002174	ENSDART00000013313	4	6	6	GGCGCCGCAGGACCTGGGGATGAA	6	+	664	1308
ENSDARG00000002174	ENSDART00000013313	4	6	6	CACAGCAACCCCTAGCAGGTGAG	5	+	690	1308
ENSDARG00000002174	ENSDART00000013313	4	11	11	CTCCACAGACTGGGAGTGGGTGAG	6	+	1222	1308
ENSDARG00000002174	ENSDART00000013313	4	11	11	CACACCTGCTCCACAGACTGGGAG	6	+	1214	1308
ENSDARG00000002174	ENSDART00000013313	4	11	11	CAAACCTGCTGAGTGTGCTGGAGGA	7	+	1175	1308
ENSDARG00000002174	ENSDART00000013313	4	11	11	TGCTCCACAGACTGGGAGTGGGT	5	+	1220	1308
ENSDARG00000002174	ENSDART00000013313	4	11	11	TGCTCCACAGACTGGGAGTGGGTG	6	+	1220	1308
ENSDARG00000002303	ENSDART00000006803	4	1	1	CTCACCCTCTGCCTGTAGCAGGC	5	-	52	2883
ENSDARG00000002303	ENSDART00000006803	4	1	1	ACCCTCTGCCTGTAGCAGGCGTC	5	-	49	2883
ENSDARG00000002303	ENSDART00000006803	4	1	1	TGCTCACCCTCTGCCTGTAGCAGGC	7	-	52	2883
ENSDARG00000002303	ENSDART00000006803	4	2	2	GTAAACCCCTTTAGCGAGGGCTTC	6	-	127	2883
ENSDARG00000002303	ENSDART00000006803	4	2	2	CTCCCATCCATCCAGAGACGCCTTT	7	-	93	2883
ENSDARG00000002303	ENSDART00000006803	4	3	3	CTCCAAGACTTGAAAGCAGAAGAA	6	-	169	2883
ENSDARG00000002303	ENSDART00000006803	4	4	4	GAAAGCGACCCGTGTCTGAAAAC	5	-	202	2883
ENSDARG00000002303	ENSDART00000006803	4	4	4	ATCAGCTGCTGTTGAGCTGCAGAA	6	-	222	2883
ENSDARG00000002303	ENSDART00000006803	4	5	5	GCCGCCTTATTCCTGATGAAGGG	5	-	304	2883
ENSDARG00000002303	ENSDART00000006803	4	5	5	GTCCACACCATTCGGATTGAGAC	5	-	407	2883
ENSDARG00000002303	ENSDART00000006803	4	7	7	GACTCCACCAGTTTGGTTTTGTC	5	-	784	2883
ENSDARG00000002303	ENSDART00000006803	4	7	7	AGACTCCACCAGTTTGGTTTTGTC	6	-	784	2883
ENSDARG00000002303	ENSDART00000006803	4	7	7	AGAGACTCCACCAGTTTGGTTTT	5	-	787	2883
ENSDARG00000002303	ENSDART00000006803	4	7	7	ACCTGCTCCACATTGAAGAAGCC	5	-	832	2883
ENSDARG00000002303	ENSDART00000006803	4	8	8	TCCGCCGTCTTGCTGAGTTTGGT	5	-	928	2883
ENSDARG00000002303	ENSDART00000006803	4	8	8	CTCGTCCGCCGTCTTGCTGAGTT	5	-	932	2883
ENSDARG00000002303	ENSDART00000006803	4	8	8	CTCGTCCGCCGTCTTGCTGAGTTT	6	-	931	2883
ENSDARG00000002303	ENSDART00000006803	4	8	8	AGAAGCAGACGATGTTAGCTGAA	5	-	1038	2883
ENSDARG00000002303	ENSDART00000006803	4	8	8	ATCGTCTTCATGGATTAGCAGCT	5	-	1010	2883
ENSDARG00000002303	ENSDART00000006803	4	8	8	GAAATCTTCTCGTCCGCCGTCTTG	6	-	939	2883
ENSDARG00000002303	ENSDART00000006803	4	9	9	ACCTCCACATTGCTCTTCTGCTGCT	7	-	1106	2883
ENSDARG00000002303	ENSDART00000006803	4	9	9	CTCTTCTGCTGCTCGTTGAGTGC	5	-	1096	2883
ENSDARG00000002303	ENSDART00000006803	4	10	10	CTCGTCATCATACTTGAGTTTGCT	6	-	1150	2883
ENSDARG00000002303	ENSDART00000006803	4	11	11	GCCTCCAGCAGCAGCTCTGGAGAA	6	-	1263	2883
ENSDARG00000002303	ENSDART00000006803	4	12	12	TCCACCTCCATGAACTGCAGCGTCT	7	-	1325	2883
ENSDARG00000002303	ENSDART00000006803	4	12	12	GTTCTCATCATGGCCTGCAGTGTGC	7	-	1436	2883
ENSDARG00000002303	ENSDART00000006803	4	12	12	CACCCAGCATATACAGCAGCCGGA	6	-	1358	2883
ENSDARG00000002303	ENSDART00000006803	4	13	13	AACTCCAGAGTGACGGAGGAATGC	6	-	1491	2883
ENSDARG00000002303	ENSDART00000006803	4	13	13	AAAAACTCCAGAGTGACGGAGGA	5	-	1495	2883
ENSDARG00000002303	ENSDART00000006803	4	13	13	GAAAAACTCCAGAGTGACGGAGGA	6	-	1495	2883
ENSDARG00000002303	ENSDART00000006803	4	13	13	TGCGGCTCCACCAGGAAGAATTT	5	-	1540	2883
ENSDARG00000002303	ENSDART00000006803	4	14	14	GACTGCGCACCTTTGGGCTGCTGTG	7	-	1612	2883
ENSDARG00000002303	ENSDART00000006803	4	14	14	CTCGACTGCGCACCTTTGGGCTGCT	7	-	1615	2883
ENSDARG00000002303	ENSDART00000006803	4	16	16	GAAGCCCACAGCGTGACTGAGGC	5	-	1958	2883
ENSDARG00000002303	ENSDART00000006803	4	16	16	CCCTGCTTACGCTCTGCTGGAGAC	6	-	1830	2883
ENSDARG00000002303	ENSDART00000006803	4	16	16	GCCCACAGCGTGACTGAGGCAGTC	6	-	1954	2883
ENSDARG00000002303	ENSDART00000006803	4	16	16	AGACCCTGCTTACGCTCTGCTGGA	6	-	1833	2883
ENSDARG00000002303	ENSDART00000006803	4	17	17	TCCTTCAGCATGTGCTGGGACGCG	6	-	2184	2883
ENSDARG00000002303	ENSDART00000006803	4	17	17	AACGCCTTACTGGTGCGGCTGAG	5	-	1981	2883
ENSDARG00000002303	ENSDART00000006803	4	17	17	AACGCCTTACTGGTGCGGCTGAGAG	7	-	1979	2883
ENSDARG00000002303	ENSDART00000006803	4	17	17	AGATACACCTCCGAGCAGCCGCA	5	-	2029	2883
ENSDARG00000002303	ENSDART00000006803	4	17	17	AGCGCCGGCAGGAACGTCTGCAGGC	7	-	2057	2883
ENSDARG00000002303	ENSDART00000006803	4	18	18	GACTGCTGCTGCTGCTGGCGATGGT	7	-	2419	2883
ENSDARG00000002303	ENSDART00000006803	4	18	18	AGCTCCTCCTCAGCATCTGCTTCT	6	-	2378	2883
ENSDARG00000002303	ENSDART00000006803	4	18	18	ATCTGCTTCTCCAGCGCCGCCGTC	6	-	2364	2883
ENSDARG00000002303	ENSDART00000006803	4	19	19	CACAGCGCCCTGAATGATGGTGAA	6	-	2488	2883
ENSDARG00000002303	ENSDART00000006803	4	20	20	CTCACCAGAACCGTCTGCGCATCT	6	-	2676	2883
ENSDARG00000002303	ENSDART00000043424	4	1	1	GACTCCACCAGTTTGGTTTTGTC	5	-	96	660
ENSDARG00000002303	ENSDART00000043424	4	1	1	AGACTCCACCAGTTTGGTTTTGTC	6	-	96	660
ENSDARG00000002303	ENSDART00000043424	4	1	1	AGAGACTCCACCAGTTTGGTTTT	5	-	99	660
ENSDARG00000002303	ENSDART00000043424	4	3	3	TCCACCTCCATGAACTGCAGCGTCT	7	-	158	660
ENSDARG00000002303	ENSDART00000043424	4	3	3	CACCCAGCATATACAGCAGCCGGA	6	-	191	660
ENSDARG00000002303	ENSDART00000043424	4	3	3	GTTCTCATCATGGCCTGCAGTGTGC	7	-	269	660
ENSDARG00000002303	ENSDART00000043424	4	4	4	TGCGGCTCCACCAGGAAGAATTT	5	-	373	660
ENSDARG00000002303	ENSDART00000043424	4	4	4	GAAAAACTCCAGAGTGACGGAGGA	6	-	328	660
ENSDARG00000002303	ENSDART00000043424	4	4	4	AAAAACTCCAGAGTGACGGAGGA	5	-	328	660
ENSDARG00000002303	ENSDART00000043424	4	4	4	AACTCCAGAGTGACGGAGGAATGC	6	-	324	660
ENSDARG00000002303	ENSDART00000043424	4	5	5	GACTGCGCACCTTTGGGCTGCTGTG	7	-	445	660
ENSDARG00000002303	ENSDART00000043424	4	5	5	CTCGACTGCGCACCTTTGGGCTGCT	7	-	448	660
ENSDARG00000002303	ENSDART00000082119	4	2	1	TGCTCACCCTCTGCCTGTAGCAGGC	7	-	52	2883
ENSDARG00000002303	ENSDART00000082119	4	2	1	CTCACCCTCTGCCTGTAGCAGGC	5	-	52	2883
ENSDARG00000002303	ENSDART00000082119	4	2	1	ACCCTCTGCCTGTAGCAGGCGTC	5	-	49	2883
ENSDARG00000002303	ENSDART00000082119	4	3	2	CTCCCATCCATCCAGAGACGCCTTT	7	-	93	2883
ENSDARG00000002303	ENSDART00000082119	4	3	2	GTAAACCCCTTTAGCGAGGGCTTC	6	-	127	2883
ENSDARG00000002303	ENSDART00000082119	4	4	3	CTCCAAGACTTGAAAGCAGAAGAA	6	-	169	2883
ENSDARG00000002303	ENSDART00000082119	4	5	4	GAAAGCGACCCGTGTCTGAAAAC	5	-	202	2883
ENSDARG00000002303	ENSDART00000082119	4	5	4	ATCAGCTGCTGTTGAGCTGCAGAA	6	-	222	2883
ENSDARG00000002303	ENSDART00000082119	4	6	5	GCCGCCTTATTCCTGATGAAGGG	5	-	304	2883
ENSDARG00000002303	ENSDART00000082119	4	6	5	GTCCACACCATTCGGATTGAGAC	5	-	407	2883
ENSDARG00000002303	ENSDART00000082119	4	8	7	AGAGACTCCACCAGTTTGGTTTT	5	-	787	2883
ENSDARG00000002303	ENSDART00000082119	4	8	7	ACCTGCTCCACATTGAAGAAGCC	5	-	832	2883
ENSDARG00000002303	ENSDART00000082119	4	8	7	AGACTCCACCAGTTTGGTTTTGTC	6	-	784	2883
ENSDARG00000002303	ENSDART00000082119	4	8	7	GACTCCACCAGTTTGGTTTTGTC	5	-	784	2883
ENSDARG00000002303	ENSDART00000082119	4	9	8	AGAAGCAGACGATGTTAGCTGAA	5	-	1038	2883
ENSDARG00000002303	ENSDART00000082119	4	9	8	GAAATCTTCTCGTCCGCCGTCTTG	6	-	939	2883
ENSDARG00000002303	ENSDART00000082119	4	9	8	CTCGTCCGCCGTCTTGCTGAGTT	5	-	932	2883
ENSDARG00000002303	ENSDART00000082119	4	9	8	ATCGTCTTCATGGATTAGCAGCT	5	-	1010	2883
ENSDARG00000002303	ENSDART00000082119	4	9	8	CTCGTCCGCCGTCTTGCTGAGTTT	6	-	931	2883
ENSDARG00000002303	ENSDART00000082119	4	9	8	TCCGCCGTCTTGCTGAGTTTGGT	5	-	928	2883
ENSDARG00000002303	ENSDART00000082119	4	10	9	CTCTTCTGCTGCTCGTTGAGTGC	5	-	1096	2883
ENSDARG00000002303	ENSDART00000082119	4	10	9	ACCTCCACATTGCTCTTCTGCTGCT	7	-	1106	2883
ENSDARG00000002303	ENSDART00000082119	4	11	10	CTCGTCATCATACTTGAGTTTGCT	6	-	1150	2883
ENSDARG00000002303	ENSDART00000082119	4	12	11	GCCTCCAGCAGCAGCTCTGGAGAA	6	-	1263	2883
ENSDARG00000002303	ENSDART00000082119	4	13	12	CACCCAGCATATACAGCAGCCGGA	6	-	1358	2883
ENSDARG00000002303	ENSDART00000082119	4	13	12	TCCACCTCCATGAACTGCAGCGTCT	7	-	1325	2883
ENSDARG00000002303	ENSDART00000082119	4	13	12	GTTCTCATCATGGCCTGCAGTGTGC	7	-	1436	2883
ENSDARG00000002303	ENSDART00000082119	4	14	13	GAAAAACTCCAGAGTGACGGAGGA	6	-	1495	2883
ENSDARG00000002303	ENSDART00000082119	4	14	13	AACTCCAGAGTGACGGAGGAATGC	6	-	1491	2883
ENSDARG00000002303	ENSDART00000082119	4	14	13	AAAAACTCCAGAGTGACGGAGGA	5	-	1495	2883
ENSDARG00000002303	ENSDART00000082119	4	14	13	TGCGGCTCCACCAGGAAGAATTT	5	-	1540	2883
ENSDARG00000002303	ENSDART00000082119	4	15	14	CTCGACTGCGCACCTTTGGGCTGCT	7	-	1615	2883
ENSDARG00000002303	ENSDART00000082119	4	15	14	GACTGCGCACCTTTGGGCTGCTGTG	7	-	1612	2883
ENSDARG00000002303	ENSDART00000082119	4	17	16	GAAGCCCACAGCGTGACTGAGGC	5	-	1958	2883
ENSDARG00000002303	ENSDART00000082119	4	17	16	GCCCACAGCGTGACTGAGGCAGTC	6	-	1954	2883
ENSDARG00000002303	ENSDART00000082119	4	17	16	CCCTGCTTACGCTCTGCTGGAGAC	6	-	1830	2883
ENSDARG00000002303	ENSDART00000082119	4	17	16	AGACCCTGCTTACGCTCTGCTGGA	6	-	1833	2883
ENSDARG00000002303	ENSDART00000082119	4	18	17	AGCGCCGGCAGGAACGTCTGCAGGC	7	-	2057	2883
ENSDARG00000002303	ENSDART00000082119	4	18	17	AACGCCTTACTGGTGCGGCTGAG	5	-	1981	2883
ENSDARG00000002303	ENSDART00000082119	4	18	17	AACGCCTTACTGGTGCGGCTGAGAG	7	-	1979	2883
ENSDARG00000002303	ENSDART00000082119	4	18	17	TCCTTCAGCATGTGCTGGGACGCG	6	-	2184	2883
ENSDARG00000002303	ENSDART00000082119	4	18	17	AGATACACCTCCGAGCAGCCGCA	5	-	2029	2883
ENSDARG00000002303	ENSDART00000082119	4	19	18	GACTGCTGCTGCTGCTGGCGATGGT	7	-	2419	2883
ENSDARG00000002303	ENSDART00000082119	4	19	18	AGCTCCTCCTCAGCATCTGCTTCT	6	-	2378	2883
ENSDARG00000002303	ENSDART00000082119	4	19	18	ATCTGCTTCTCCAGCGCCGCCGTC	6	-	2364	2883
ENSDARG00000002303	ENSDART00000082119	4	20	19	CACAGCGCCCTGAATGATGGTGAA	6	-	2488	2883
ENSDARG00000002303	ENSDART00000082119	4	21	20	CTCACCAGAACCGTCTGCGCATCT	6	-	2676	2883
ENSDARG00000002400	ENSDART00000011882	4	3	1	GACCCAGCAGATATGGAAGATGTT	6	+	13	1155
ENSDARG00000002400	ENSDART00000011882	4	3	1	CCCAGCAGATATGGAAGATGTTGAA	7	+	15	1155
ENSDARG00000002400	ENSDART00000011882	4	4	2	AGAATCCTCAGATTCTGGCGGCGCT	7	+	104	1155
ENSDARG00000002400	ENSDART00000011882	4	4	2	ATCCTCAGATTCTGGCGGCGCTGCA	7	+	107	1155
ENSDARG00000002400	ENSDART00000011882	4	4	2	CACGTCAGCTGACGCGGCAGATGAT	7	+	77	1155
ENSDARG00000002400	ENSDART00000011882	4	6	4	ACCCACAGATGAAGAGTGTGAGTG	6	+	351	1155
ENSDARG00000002400	ENSDART00000011882	4	8	6	AAAGTCAAATTCTCTGACGCCGGA	6	+	583	1155
ENSDARG00000002400	ENSDART00000011882	4	9	7	GACAAAAACCTACAAGATGCGGTC	6	+	672	1155
ENSDARG00000002400	ENSDART00000011882	4	9	7	ACAAAAACCTACAAGATGCGGTC	5	+	673	1155
ENSDARG00000002400	ENSDART00000011882	4	12	10	AGACTCAGAGGCAGTTTTAGCAGCA	7	+	927	1155
ENSDARG00000002400	ENSDART00000011882	4	12	10	GTTCCCAGAGCTGTGCTGTATTT	5	+	988	1155
ENSDARG00000002663	ENSDART00000014036	4	4	3	CTATTCTAATCTCAATGAAGGAGTT	7	-	457	1566
ENSDARG00000002663	ENSDART00000014036	4	7	6	AGCTGCAGAGGGTAGAGATGTCTGT	7	-	702	1566
ENSDARG00000002663	ENSDART00000014036	4	9	8	CTCCAAATCTTTACATCTGAAGAC	6	-	844	1566
ENSDARG00000002663	ENSDART00000014036	4	10	9	GTAGTCTTCAAACAGCTTGGTGT	5	-	1031	1566
ENSDARG00000002663	ENSDART00000014036	4	12	11	GACTCCATCTCCTCTTGAAGCTGGC	7	-	1352	1566
ENSDARG00000002663	ENSDART00000014036	4	12	11	TCCATCTCCTCTTGAAGCTGGCTGT	7	-	1349	1566
ENSDARG00000002663	ENSDART00000014036	4	13	12	TACCTCTACCTCCAGGCAGGTTGT	6	-	1457	1566
ENSDARG00000002674	ENSDART00000006240	4	1	1	AACTCAAGAGTTTGGGGTTGGAT	5	+	242	7056
ENSDARG00000002674	ENSDART00000006240	4	1	1	GCACACTGCAGAACAAGGGGCAGTT	7	+	308	7056
ENSDARG00000002674	ENSDART00000006240	4	1	1	AGAAGCAACAGTTCTGTGTTAGGTA	7	+	79	7056
ENSDARG00000002674	ENSDART00000006240	4	1	1	CACTGCAGAACAAGGGGCAGTTTGT	7	+	311	7056
ENSDARG00000002674	ENSDART00000006240	4	1	1	AGAGACAGACCAGCTCTTGGGGA	5	+	433	7056
ENSDARG00000002674	ENSDART00000006240	4	1	1	AGCTCCAGATGGCATGGTTGCTGAT	7	+	591	7056
ENSDARG00000002674	ENSDART00000006240	4	1	1	AACATCCCCAGAAGTTTGGATTT	5	+	407	7056
ENSDARG00000002674	ENSDART00000006240	4	1	1	AACAGCGCAGGAATGCAGAGGCC	5	+	44	7056
ENSDARG00000002674	ENSDART00000006240	4	2	2	CAATACAGAGAAAAGAAGAAGAA	5	+	1312	7056
ENSDARG00000002674	ENSDART00000006240	4	3	3	CACAAAGCATACTATTTGTTTAA	5	+	1591	7056
ENSDARG00000002674	ENSDART00000006240	4	3	3	TTATGCAACCAATAAAGAGGTAGAT	7	+	5673	7056
ENSDARG00000002674	ENSDART00000006240	4	3	3	CACAAAGTCTTGTCTGCTTTGCA	5	+	2323	7056
ENSDARG00000002674	ENSDART00000006240	4	3	3	CACATCGCACAGATGAGCAGCTGAG	7	+	4514	7056
ENSDARG00000002674	ENSDART00000006240	4	3	3	GCAATCAACATGATAGCAGTGGTG	6	+	2519	7056
ENSDARG00000002674	ENSDART00000006240	4	3	3	CACTACAAATAGCTGTTGGAGCA	5	+	5840	7056
ENSDARG00000002674	ENSDART00000006240	4	3	3	TTAATCGGCCTGCATTTGGATAA	5	+	5974	7056
ENSDARG00000002674	ENSDART00000006240	4	3	3	CTCAAAGGCATTGATGGGCTGCA	5	+	4591	7056
ENSDARG00000002674	ENSDART00000006240	4	3	3	GACCCCAGCATACTGGGAGAAAAC	6	+	3036	7056
ENSDARG00000002674	ENSDART00000006240	4	3	3	GACGACCACAGGACTGCTGGGTG	5	+	3851	7056
ENSDARG00000002674	ENSDART00000006240	4	3	3	TGCTCAACAGGCTGAGAGTGAAAC	6	+	5555	7056
ENSDARG00000002674	ENSDART00000006240	4	3	3	GTTTCATGCAACCATTAAGAGGGA	6	+	3014	7056
ENSDARG00000002674	ENSDART00000006240	4	3	3	GTAATCAGAAACCCTTTGGTGGA	5	+	5366	7056
ENSDARG00000002674	ENSDART00000006240	4	3	3	GCATTCACAGGCACTGCAGCTTTT	6	+	5146	7056
ENSDARG00000002674	ENSDART00000006240	4	3	3	TTCCTAAACCACCCATTAAGAGAAC	7	+	3587	7056
ENSDARG00000002674	ENSDART00000006240	4	3	3	CAACTCACAATAGAGATGGTGCT	5	+	5939	7056
ENSDARG00000002674	ENSDART00000006240	4	3	3	AAAACCCACAACAATTTTTGTATTT	7	+	4988	7056
ENSDARG00000002674	ENSDART00000006240	4	3	3	AAACACTGCACTGTCTTCTGAAGCT	7	+	5183	7056
ENSDARG00000002674	ENSDART00000006240	4	3	3	AAACCCACAACAATTTTTGTATTT	6	+	4989	7056
ENSDARG00000002674	ENSDART00000006240	4	3	3	AAAGGCTTCCATGCATGCGAGAAC	6	+	5087	7056
ENSDARG00000002674	ENSDART00000006240	4	3	3	AAATACAAAAAGCACTGTAGATTTG	7	+	3559	7056
ENSDARG00000002674	ENSDART00000006240	4	3	3	AACAACAACATGGTCTTGTTTTGGA	7	+	2561	7056
ENSDARG00000002674	ENSDART00000006240	4	3	3	AACCTATGCATGGCTGAATTTGCA	6	+	4309	7056
ENSDARG00000002674	ENSDART00000006240	4	3	3	ACAAAAAGCACTGTAGATTTGGAT	6	+	3563	7056
ENSDARG00000002674	ENSDART00000006240	4	3	3	ACACACTACAAATAGCTGTTGGA	5	+	5837	7056
ENSDARG00000002674	ENSDART00000006240	4	3	3	ACACTCACAGGTCAGAGCCGGTGTT	7	+	6978	7056
ENSDARG00000002674	ENSDART00000006240	4	3	3	CAAAACCACTTTGTGTGTATGAGGG	7	+	5441	7056
ENSDARG00000002674	ENSDART00000006240	4	3	3	AGACTATGCCAACAGTGGACTTT	5	+	6314	7056
ENSDARG00000002674	ENSDART00000006240	4	3	3	AGACCAGCCAGACCTGAATTTGAG	6	+	4285	7056
ENSDARG00000002674	ENSDART00000006240	4	3	3	AGAAAAGGCAATTGAAGATTTTGAA	7	+	4674	7056
ENSDARG00000002674	ENSDART00000006240	4	3	3	AGAAAACTCTTCGTGATTTGTTTGC	7	+	3053	7056
ENSDARG00000002674	ENSDART00000006240	4	3	3	AGAAAACTCTTCGTGATTTGTTT	5	+	3053	7056
ENSDARG00000002674	ENSDART00000006240	4	3	3	ACCCCAGCATACTGGGAGAAAAC	5	+	3037	7056
ENSDARG00000002952	ENSDART00000005985	4	1	1	TGCCTAGGCTCGCCTTTGCCGTA	5	+	175	2466
ENSDARG00000002952	ENSDART00000005985	4	1	1	GTACACGCACACGTCTCTGATTCT	6	+	195	2466
ENSDARG00000002952	ENSDART00000005985	4	1	1	CCCTGCTCCATTGTTGGAAGCTTTT	7	+	25	2466
ENSDARG00000002952	ENSDART00000005985	4	1	1	AGACTCAGAAACTCAAGAGGAAGCC	7	+	225	2466
ENSDARG00000002952	ENSDART00000005985	4	1	1	CTAAAATACAATACGTGCCTAGGCT	7	+	160	2466
ENSDARG00000002952	ENSDART00000005985	4	2	2	AAATGCTCCTCGCTGTTGGGCCGTC	7	+	282	2466
ENSDARG00000002952	ENSDART00000005985	4	2	2	CTACACGCAATCCATGCAGTATTG	6	+	389	2466
ENSDARG00000002952	ENSDART00000005985	4	2	2	CCCAACTTCCTAAAGTGTGAAAAC	6	+	433	2466
ENSDARG00000002952	ENSDART00000005985	4	3	3	CAACACTTCAGGCCAATGCGAGGCT	7	+	507	2466
ENSDARG00000002952	ENSDART00000005985	4	4	4	AAAAGCGACAACACTATGCGACTTG	7	+	832	2466
ENSDARG00000002952	ENSDART00000005985	4	4	4	AGCGACAACACTATGCGACTTGGAG	7	+	835	2466
ENSDARG00000002952	ENSDART00000005985	4	9	9	ACAGGCCCAGTCTGCTGGTGGGGA	6	+	1478	2466
ENSDARG00000002952	ENSDART00000005985	4	9	9	ACAGGCCCAGTCTGCTGGTGGGGAA	7	+	1478	2466
ENSDARG00000002952	ENSDART00000005985	4	12	12	TGCCTACCACCGGAGGGAGTTTGGC	7	+	2022	2466
ENSDARG00000002952	ENSDART00000005985	4	12	12	TCCGGCACCTTGGGCAGGAGGCTTC	7	+	2333	2466
ENSDARG00000002952	ENSDART00000005985	4	12	12	GTCCACTTCCTTACCAGGATAGGTA	7	+	2180	2466
ENSDARG00000002952	ENSDART00000005985	4	12	12	GCCTACCACCGGAGGGAGTTTGGC	6	+	2023	2466
ENSDARG00000002952	ENSDART00000005985	4	12	12	GAACCAATCTTATGGATGCTGAGCT	7	+	2429	2466
ENSDARG00000002952	ENSDART00000005985	4	12	12	GAACCAATCTTATGGATGCTGAG	5	+	2429	2466
ENSDARG00000002952	ENSDART00000005985	4	12	12	AACAGCAGCGACAGCAGCAGGAGGA	7	+	2111	2466
ENSDARG00000003512	ENSDART00000024367	4	1	1	AAAAACACATCCAGTGATGGAGAA	6	-	39	1557
ENSDARG00000003512	ENSDART00000024367	4	2	2	ACCGACACATGTGAGAAGTGGCC	5	-	163	1557
ENSDARG00000003512	ENSDART00000024367	4	4	4	GTAGACTACCTGCGGTTTGACTTC	6	-	748	1557
ENSDARG00000003512	ENSDART00000024367	4	4	4	ATCCTCCCAAGAGTGCAGGCTCT	5	-	925	1557
ENSDARG00000003512	ENSDART00000024367	4	4	4	AGACACAGCCACCAGGTTAGAGTCT	7	-	1005	1557
ENSDARG00000003570	ENSDART00000004879	4	2	2	TCCCGCACCGATGACGAGGTTGTT	6	+	133	2379
ENSDARG00000003570	ENSDART00000004879	4	2	2	TACAGCATCTGTAAAAGCTGATGAT	7	+	54	2379
ENSDARG00000003570	ENSDART00000004879	4	5	5	GACCAAAGAAGAACTGGTGAAGAA	6	+	471	2379
ENSDARG00000003570	ENSDART00000004879	4	5	5	CTACTCCGCTTTCCTTGTGGCCGAT	7	+	606	2379
ENSDARG00000003570	ENSDART00000004879	4	5	5	ACACCCAGCACATGTGGGAATCT	5	+	662	2379
ENSDARG00000003570	ENSDART00000004879	4	6	6	TTCCCCATCTACGTATGGAGCAGCA	7	+	838	2379
ENSDARG00000003570	ENSDART00000004879	4	7	7	ACCAAAGACTAAGAAGGTTTTTAG	6	+	969	2379
ENSDARG00000003570	ENSDART00000004879	4	7	7	TTCCCAGACCGAGACCGTAGAAGAG	7	+	858	2379
ENSDARG00000003570	ENSDART00000004879	4	7	7	CAAACCAAAGACTAAGAAGGTTTT	6	+	966	2379
ENSDARG00000003570	ENSDART00000004879	4	7	7	AACCAAAGACTAAGAAGGTTTTTAG	7	+	968	2379
ENSDARG00000003570	ENSDART00000004879	4	7	7	AGAAGCCACTGAAGATGAAGCTGAA	7	+	915	2379
ENSDARG00000003570	ENSDART00000004879	4	7	7	GACAAACCAAAGACTAAGAAGGT	5	+	964	2379
ENSDARG00000003570	ENSDART00000004879	4	8	8	ACCTGCAAAGGAAGTGGAGGAAGAT	7	+	1044	2379
ENSDARG00000003570	ENSDART00000004879	4	9	9	ATCTGCACCCAGAGGTCTTTTTG	5	+	1182	2379
ENSDARG00000003570	ENSDART00000004879	4	9	9	GCACCCAGAGGTCTTTTTGACGAG	6	+	1186	2379
ENSDARG00000003570	ENSDART00000004879	4	9	9	CACTTCACCGCTGAAGGCGAAGTC	6	+	1129	2379
ENSDARG00000003570	ENSDART00000004879	4	9	9	TGCATCTGCACCCAGAGGTCTTT	5	+	1179	2379
ENSDARG00000003570	ENSDART00000004879	4	10	10	CTCAACTTCATCAAGGGTGTTGTAA	7	+	1297	2379
ENSDARG00000003570	ENSDART00000004879	4	10	10	CTCAACTTCATCAAGGGTGTTGTA	6	+	1297	2379
ENSDARG00000003570	ENSDART00000004879	4	10	10	AGAGTCTTCATCACTGATGACTTC	6	+	1252	2379
ENSDARG00000003570	ENSDART00000004879	4	13	13	ATCATCTCCATTTGTGGAGAAGCT	6	+	1659	2379
ENSDARG00000003570	ENSDART00000004879	4	14	14	AAACTCTCCATGTGCTCTGGTTGC	6	+	1932	2379
ENSDARG00000003570	ENSDART00000004879	4	15	15	CTCATCAAAGAGATGCTAAGGAGAG	7	+	2086	2379
ENSDARG00000003570	ENSDART00000004879	4	16	16	GACGGCCGCAGATTTAGCCGTAGTG	7	+	2133	2379
ENSDARG00000003570	ENSDART00000004879	4	17	17	ACAGACAGAGGAAGCTGAGGATGAG	7	+	2304	2379
ENSDARG00000003615	ENSDART00000007599	4	2	2	GAATGCTGCTCTTTCTCTGTTGCC	6	+	162	2085
ENSDARG00000003615	ENSDART00000007599	4	3	3	CACGACACATTTCAGTAGGTGAG	5	+	374	2085
ENSDARG00000003615	ENSDART00000007599	4	3	3	CTAGCCTTCAGTTTGCTGGCTTC	5	+	283	2085
ENSDARG00000003615	ENSDART00000007599	4	4	4	GCCAACATCACTGCCTTTGAGGGC	6	+	463	2085
ENSDARG00000003615	ENSDART00000007599	4	8	8	TTCCCAATCGCTATTGTGGGATTTG	7	+	1012	2085
ENSDARG00000003615	ENSDART00000007599	4	8	8	TTCCCAATCGCTATTGTGGGATTT	6	+	1012	2085
ENSDARG00000003615	ENSDART00000007599	4	13	13	AGAGACAAACTAAAGGATGCTGTG	6	+	1561	2085
ENSDARG00000003615	ENSDART00000007599	4	13	13	ACAAACTAAAGGATGCTGTGAGTAC	7	+	1565	2085
ENSDARG00000003615	ENSDART00000007599	4	14	14	AAACAAGGCTGTGAAGAAGATTAA	6	+	1617	2085
ENSDARG00000003615	ENSDART00000007599	4	16	16	TTATACGCATTGATGTTGATGTT	5	+	1919	2085
ENSDARG00000003615	ENSDART00000007599	4	17	17	AGAAGCTAAAGAACTGTAAGTTTTT	7	+	1973	2085
ENSDARG00000003615	ENSDART00000101043	4	3	2	GAATGCTGCTCTTTCTCTGTTGCC	6	+	162	2286
ENSDARG00000003615	ENSDART00000101043	4	4	3	CTAGCCTTCAGTTTGCTGGCTTC	5	+	283	2286
ENSDARG00000003615	ENSDART00000101043	4	4	3	CACGACACATTTCAGTAGGTGAG	5	+	374	2286
ENSDARG00000003615	ENSDART00000101043	4	5	4	GCCAACATCACTGCCTTTGAGGGC	6	+	463	2286
ENSDARG00000003615	ENSDART00000101043	4	9	8	TTCCCAATCGCTATTGTGGGATTTG	7	+	1012	2286
ENSDARG00000003615	ENSDART00000101043	4	9	8	TTCCCAATCGCTATTGTGGGATTT	6	+	1012	2286
ENSDARG00000003615	ENSDART00000101043	4	15	14	AGAGACAAACTAAAGGATGCTGTG	6	+	1639	2286
ENSDARG00000003615	ENSDART00000101043	4	15	14	ACAAACTAAAGGATGCTGTGAGTAC	7	+	1643	2286
ENSDARG00000003615	ENSDART00000101043	4	16	15	AAACAAGGCTGTGAAGAAGATTAA	6	+	1695	2286
ENSDARG00000003615	ENSDART00000101043	4	18	17	TTATACGCATTGATGTTGATGTT	5	+	1997	2286
ENSDARG00000003615	ENSDART00000101043	4	19	18	AGAAGCTAAAGAACTGTAAGTTTTT	7	+	2051	2286
ENSDARG00000003615	ENSDART00000101043	4	20	19	ATCAACACCTTAATGGCAGCAGTG	6	+	2192	2286
ENSDARG00000003615	ENSDART00000101043	4	20	19	AACACCTTAATGGCAGCAGTGTCT	6	+	2195	2286
ENSDARG00000003630	ENSDART00000018990	4	4	3	GTCGCCAACACTGCAGCTGATGGT	6	+	163	654
ENSDARG00000003630	ENSDART00000018990	4	4	3	CGCCAACACTGCAGCTGATGGTGTG	7	+	165	654
ENSDARG00000003630	ENSDART00000018990	4	4	3	CACTGCAGCTGATGGTGTGTGTGC	6	+	171	654
ENSDARG00000003630	ENSDART00000018990	4	4	3	CAACACTGCAGCTGATGGTGTGTGT	7	+	168	654
ENSDARG00000003630	ENSDART00000018990	4	5	4	CTCTACACAAAGACTGCGTCGTC	5	+	218	654
ENSDARG00000003630	ENSDART00000018990	4	7	6	CCCCACACAGCAGCTGGGTGAGTA	6	+	477	654
ENSDARG00000003630	ENSDART00000018990	4	7	6	CCCCACACAGCAGCTGGGTGAGTAA	7	+	477	654
ENSDARG00000003630	ENSDART00000018990	4	7	6	ACCCCACACAGCAGCTGGGTGAGTA	7	+	476	654
ENSDARG00000003630	ENSDART00000018990	4	9	8	TTCTTCTACCTCTGGATGAATTT	5	+	518	654
ENSDARG00000003630	ENSDART00000018990	4	9	8	TTCAGCAAAAAATTGATGGTGAGTA	7	+	539	654
ENSDARG00000003630	ENSDART00000018990	4	9	8	TTCAGCAAAAAATTGATGGTGAG	5	+	539	654
ENSDARG00000003630	ENSDART00000018990	4	9	8	AGCAAAAAATTGATGGTGAGTAA	5	+	542	654
ENSDARG00000003789	ENSDART00000033053	4	1	1	GTTCAAGTCCCGTTTCGTCGTCTAA	7	-	79	3945
ENSDARG00000003789	ENSDART00000033053	4	4	4	TTCTGCCTCCATGAGCGGATGGA	5	-	585	3945
ENSDARG00000003789	ENSDART00000033053	4	4	4	GCCGTCCTCTCGGGTGATGAGGAA	6	-	355	3945
ENSDARG00000003789	ENSDART00000033053	4	4	4	GCAATCAAACACATGGCTTTGGAC	6	-	651	3945
ENSDARG00000003789	ENSDART00000033053	4	4	4	GCAATCAAACACATGGCTTTGGA	5	-	652	3945
ENSDARG00000003789	ENSDART00000033053	4	4	4	CTCTCCGACTCCCGGCCGCTGAC	5	-	854	3945
ENSDARG00000003789	ENSDART00000033053	4	4	4	CCCGGCCGCTGACACAGGATTGGTT	7	-	842	3945
ENSDARG00000003789	ENSDART00000033053	4	4	4	CAATCAAACACATGGCTTTGGAC	5	-	651	3945
ENSDARG00000003789	ENSDART00000033053	4	4	4	AACGTCATCCAGACTGCTGGATAA	6	-	556	3945
ENSDARG00000003789	ENSDART00000033053	4	5	5	CGCAACCACCATGAGCCGCTGGT	5	-	995	3945
ENSDARG00000003789	ENSDART00000033053	4	6	6	GTCTGCAAACATCGTTGCGAAGCG	6	-	1648	3945
ENSDARG00000003789	ENSDART00000033053	4	6	6	ACAAACGACTCGTAGTCTGCAAAC	6	-	1662	3945
ENSDARG00000003789	ENSDART00000033053	4	6	6	TCCTTCTCCAGCACAGAGGTCTGC	6	-	1350	3945
ENSDARG00000003789	ENSDART00000033053	4	6	6	AGCCAAGACTCCAAATCTGGCGAG	6	-	1695	3945
ENSDARG00000003789	ENSDART00000033053	4	6	6	GCAAACATCGTTGCGAAGCGTGC	5	-	1645	3945
ENSDARG00000003789	ENSDART00000033053	4	6	6	CGCTTCTCCACCGAGGTTGCCGTT	6	-	1417	3945
ENSDARG00000003789	ENSDART00000033053	4	6	6	CAAGACTCCAAATCTGGCGAGTTC	6	-	1692	3945
ENSDARG00000003789	ENSDART00000033053	4	7	7	ATCAAAGACCCGAAGGAGAGGCT	5	-	1871	3945
ENSDARG00000003789	ENSDART00000033053	4	7	7	TCCATCAAAGACCCGAAGGAGAG	5	-	1874	3945
ENSDARG00000003789	ENSDART00000033053	4	8	8	CACATCTGCCTGCAGTTTGGGGAA	6	-	2086	3945
ENSDARG00000003789	ENSDART00000033053	4	8	8	CACATCTGCCTGCAGTTTGGGGA	5	-	2087	3945
ENSDARG00000003789	ENSDART00000033053	4	9	9	AGCACCAGATGTTCATTCTGCTGCC	7	-	2183	3945
ENSDARG00000003789	ENSDART00000033053	4	11	11	TTCTCCACCAACATGCGCTTGGTCT	7	-	2357	3945
ENSDARG00000003789	ENSDART00000033053	4	14	14	GACAGCAGCTGTTTGAGGTGCTGGG	7	-	2765	3945
ENSDARG00000003789	ENSDART00000033053	4	16	16	GTCATCTCCAGTATGTTTTTGGTG	6	-	3045	3945
ENSDARG00000003789	ENSDART00000033053	4	16	16	GTCATCTCCAGTATGTTTTTGGT	5	-	3046	3945
ENSDARG00000003789	ENSDART00000033053	4	16	16	ACACACACAGCCAGGGGTTGGAC	5	-	2988	3945
ENSDARG00000003789	ENSDART00000033053	4	16	16	TTACTCAGCTTCTTGATGGGGAT	5	-	2953	3945
ENSDARG00000003789	ENSDART00000033053	4	18	18	GGCGACCTCTGGAGCGGTGGTGTTT	7	-	3308	3945
ENSDARG00000003789	ENSDART00000033053	4	18	18	GGCGACCTCTGGAGCGGTGGTGTT	6	-	3309	3945
ENSDARG00000003789	ENSDART00000067019	4	2	2	TTACTCAGCTTCTTGATGGGGAT	5	-	115	456
ENSDARG00000003789	ENSDART00000067019	4	2	2	GTCATCTCCAGTATGTTTTTGGTG	6	-	207	456
ENSDARG00000003789	ENSDART00000067019	4	2	2	GTCATCTCCAGTATGTTTTTGGT	5	-	208	456
ENSDARG00000003789	ENSDART00000067019	4	2	2	ACACACACAGCCAGGGGTTGGAC	5	-	150	456
ENSDARG00000003789	ENSDART00000079461	4	1	1	GTTCAAGTCCCGTTTCGTCGTCTAA	7	-	79	3885
ENSDARG00000003789	ENSDART00000079461	4	3	3	GCCGTCCTCTCGGGTGATGAGGAA	6	-	295	3885
ENSDARG00000003789	ENSDART00000079461	4	3	3	GCAATCAAACACATGGCTTTGGAC	6	-	591	3885
ENSDARG00000003789	ENSDART00000079461	4	3	3	GCAATCAAACACATGGCTTTGGA	5	-	592	3885
ENSDARG00000003789	ENSDART00000079461	4	3	3	CTCTCCGACTCCCGGCCGCTGAC	5	-	794	3885
ENSDARG00000003789	ENSDART00000079461	4	3	3	CCCGGCCGCTGACACAGGATTGGTT	7	-	782	3885
ENSDARG00000003789	ENSDART00000079461	4	3	3	CAATCAAACACATGGCTTTGGAC	5	-	591	3885
ENSDARG00000003789	ENSDART00000079461	4	3	3	AACGTCATCCAGACTGCTGGATAA	6	-	496	3885
ENSDARG00000003789	ENSDART00000079461	4	3	3	TTCTGCCTCCATGAGCGGATGGA	5	-	525	3885
ENSDARG00000003789	ENSDART00000079461	4	4	4	CGCAACCACCATGAGCCGCTGGT	5	-	935	3885
ENSDARG00000003789	ENSDART00000079461	4	5	5	CAAGACTCCAAATCTGGCGAGTTC	6	-	1632	3885
ENSDARG00000003789	ENSDART00000079461	4	5	5	TCCTTCTCCAGCACAGAGGTCTGC	6	-	1290	3885
ENSDARG00000003789	ENSDART00000079461	4	5	5	ACAAACGACTCGTAGTCTGCAAAC	6	-	1602	3885
ENSDARG00000003789	ENSDART00000079461	4	5	5	GCAAACATCGTTGCGAAGCGTGC	5	-	1585	3885
ENSDARG00000003789	ENSDART00000079461	4	5	5	GTCTGCAAACATCGTTGCGAAGCG	6	-	1588	3885
ENSDARG00000003789	ENSDART00000079461	4	5	5	AGCCAAGACTCCAAATCTGGCGAG	6	-	1635	3885
ENSDARG00000003789	ENSDART00000079461	4	5	5	CGCTTCTCCACCGAGGTTGCCGTT	6	-	1357	3885
ENSDARG00000003789	ENSDART00000079461	4	6	6	ATCAAAGACCCGAAGGAGAGGCT	5	-	1811	3885
ENSDARG00000003789	ENSDART00000079461	4	6	6	TCCATCAAAGACCCGAAGGAGAG	5	-	1814	3885
ENSDARG00000003789	ENSDART00000079461	4	7	7	CACATCTGCCTGCAGTTTGGGGAA	6	-	2026	3885
ENSDARG00000003789	ENSDART00000079461	4	7	7	CACATCTGCCTGCAGTTTGGGGA	5	-	2027	3885
ENSDARG00000003789	ENSDART00000079461	4	8	8	AGCACCAGATGTTCATTCTGCTGCC	7	-	2123	3885
ENSDARG00000003789	ENSDART00000079461	4	10	10	TTCTCCACCAACATGCGCTTGGTCT	7	-	2297	3885
ENSDARG00000003789	ENSDART00000079461	4	13	13	GACAGCAGCTGTTTGAGGTGCTGGG	7	-	2705	3885
ENSDARG00000003789	ENSDART00000079461	4	15	15	ACACACACAGCCAGGGGTTGGAC	5	-	2928	3885
ENSDARG00000003789	ENSDART00000079461	4	15	15	GTCATCTCCAGTATGTTTTTGGTG	6	-	2985	3885
ENSDARG00000003789	ENSDART00000079461	4	15	15	TTACTCAGCTTCTTGATGGGGAT	5	-	2893	3885
ENSDARG00000003789	ENSDART00000079461	4	15	15	GTCATCTCCAGTATGTTTTTGGT	5	-	2986	3885
ENSDARG00000003789	ENSDART00000079461	4	17	17	GGCGACCTCTGGAGCGGTGGTGTT	6	-	3249	3885
ENSDARG00000003789	ENSDART00000079461	4	17	17	GGCGACCTCTGGAGCGGTGGTGTTT	7	-	3248	3885
ENSDARG00000003811	ENSDART00000010180	4	1	1	TTCCACAAACGATCAAGGTGCCGTT	7	-	319	1629
ENSDARG00000003811	ENSDART00000010180	4	1	1	TTATTCACACTGTTGAGGTTTAC	5	-	370	1629
ENSDARG00000003811	ENSDART00000010180	4	1	1	TTAGCCAGATACGCTGCTTGGAC	5	-	859	1629
ENSDARG00000003811	ENSDART00000010180	4	1	1	TGCAGCAACCGAGTGCTAATGAGCT	7	-	557	1629
ENSDARG00000003811	ENSDART00000010180	4	1	1	CACTGCGCAGTGATAGGTGGAGTGC	7	-	239	1629
ENSDARG00000003811	ENSDART00000010180	4	1	1	CACTGCGCAGTGATAGGTGGAGTG	6	-	240	1629
ENSDARG00000003811	ENSDART00000010180	4	3	3	GTAAAAGTCAGTGTGGTTTGGGT	5	-	1334	1629
ENSDARG00000003811	ENSDART00000010180	4	3	3	GTAAAAGTCAGTGTGGTTTGGGTC	6	-	1333	1629
ENSDARG00000003811	ENSDART00000010180	4	3	3	GAATCAAACAAAAGGTTTTTGTT	5	-	1393	1629
ENSDARG00000003811	ENSDART00000010180	4	5	5	GACTCCACAACCAGGCGTTTTCT	5	-	1590	1629
ENSDARG00000003811	ENSDART00000016887	4	1	1	CACTGCGCAGTGATAGGTGGAGTGC	7	-	170	5418
ENSDARG00000003811	ENSDART00000016887	4	1	1	TGCAGCAACCGAGTGCTAATGAGCT	7	-	488	5418
ENSDARG00000003811	ENSDART00000016887	4	1	1	TTATTCACACTGTTGAGGTTTAC	5	-	301	5418
ENSDARG00000003811	ENSDART00000016887	4	1	1	CACTGCGCAGTGATAGGTGGAGTG	6	-	171	5418
ENSDARG00000003811	ENSDART00000016887	4	1	1	TTCCACAAACGATCAAGGTGCCGTT	7	-	250	5418
ENSDARG00000003811	ENSDART00000016887	4	8	8	GACTCCACAACCAGGCGTTTTCT	5	-	1455	5418
ENSDARG00000003811	ENSDART00000016887	4	12	12	ACCCAATAAATATCCAGATTTTTGC	7	-	2012	5418
ENSDARG00000003811	ENSDART00000016887	4	18	18	CGCGTCTAACCGAACAGTTGTAGAG	7	-	2218	5418
ENSDARG00000003811	ENSDART00000016887	4	18	18	ACAGGCTTCTGTAGATGCAGGATTT	7	-	2305	5418
ENSDARG00000003811	ENSDART00000016887	4	20	20	ACCTCCACCGGCCCGGATTTGCT	5	-	2581	5418
ENSDARG00000003811	ENSDART00000016887	4	20	20	CACCTCCACCGGCCCGGATTTGCT	6	-	2581	5418
ENSDARG00000003811	ENSDART00000016887	4	21	21	TCCTCCAGCTGCTGGGCCTTTAAC	6	-	2683	5418
ENSDARG00000003811	ENSDART00000016887	4	22	22	TACCAAACAAAGCTGGTCTGTGGAA	7	-	2951	5418
ENSDARG00000003811	ENSDART00000016887	4	23	23	GACGTCAAACTCGTCAGAAGAGGGC	7	-	3042	5418
ENSDARG00000003811	ENSDART00000016887	4	29	29	TCCTCCAAATTGGCCAGCTGATTTT	7	-	3623	5418
ENSDARG00000003811	ENSDART00000016887	4	30	30	AGAAAACACGGTCGGTGTAGTTC	5	-	3753	5418
ENSDARG00000003811	ENSDART00000016887	4	31	31	GTCAACAAAGAGGCGAAGTAAAC	5	-	3961	5418
ENSDARG00000003811	ENSDART00000016887	4	31	31	ACCGTCAACAAAGAGGCGAAGTA	5	-	3964	5418
ENSDARG00000003811	ENSDART00000016887	4	34	34	ACCAGCACCTGTAGGGTCTGACGTG	7	-	4301	5418
ENSDARG00000003811	ENSDART00000016887	4	34	34	TTCACCTGCGAGATGGTGTCGCA	5	-	4369	5418
ENSDARG00000003811	ENSDART00000016887	4	34	34	TCCTTCACCTGCGAGATGGTGTC	5	-	4372	5418
ENSDARG00000003811	ENSDART00000016887	4	38	38	ATCATCTACAAACTGCTGCAGCG	5	-	4793	5418
ENSDARG00000003811	ENSDART00000016887	4	38	38	ATCTACAAACTGCTGCAGCGTTC	5	-	4790	5418
ENSDARG00000003811	ENSDART00000016887	4	38	38	GAACACAACACACTGCGGAAGAA	5	-	4816	5418
ENSDARG00000003811	ENSDART00000016887	4	39	39	GCAGGCGTCCATGAAGGTCTGAGCG	7	-	5046	5418
ENSDARG00000003811	ENSDART00000016887	4	39	39	GTTCACCCAGAAACGGAGAGGAA	5	-	4952	5418
ENSDARG00000003811	ENSDART00000016887	4	43	43	CGCAGCGGCGATCTGTTGCAGTC	5	-	5369	5418
ENSDARG00000003811	ENSDART00000016887	4	43	43	TCCAGCGCAGCGGCGATCTGTTGCA	7	-	5372	5418
ENSDARG00000003811	ENSDART00000048821	4	2	2	TACCAAACAAAGCTGGTCTGTGGAA	7	-	251	2757
ENSDARG00000003811	ENSDART00000048821	4	3	3	GACGTCAAACTCGTCAGAAGAGGGC	7	-	342	2757
ENSDARG00000003811	ENSDART00000048821	4	5	5	CTCCAAGGCATCTGAGCTGGTGTC	6	-	745	2757
ENSDARG00000003811	ENSDART00000048821	4	5	5	CACAAATGCCTGTGCCTCTTTGGCA	7	-	621	2757
ENSDARG00000003811	ENSDART00000048821	4	5	5	CAAGGCATCTGAGCTGGTGTCTCT	6	-	742	2757
ENSDARG00000003811	ENSDART00000048821	4	5	5	GTCACCCACAAATGCCTGTGCCTCT	7	-	627	2757
ENSDARG00000003811	ENSDART00000048821	4	7	7	TCCTCCAAATTGGCCAGCTGATTTT	7	-	953	2757
ENSDARG00000003811	ENSDART00000048821	4	8	8	AGAAAACACGGTCGGTGTAGTTC	5	-	1083	2757
ENSDARG00000003811	ENSDART00000048821	4	9	9	GTCAACAAAGAGGCGAAGTAAAC	5	-	1291	2757
ENSDARG00000003811	ENSDART00000048821	4	9	9	ACCGTCAACAAAGAGGCGAAGTA	5	-	1294	2757
ENSDARG00000003811	ENSDART00000048821	4	12	12	ACCAGCACCTGTAGGGTCTGACGTG	7	-	1631	2757
ENSDARG00000003811	ENSDART00000048821	4	12	12	TTCACCTGCGAGATGGTGTCGCA	5	-	1699	2757
ENSDARG00000003811	ENSDART00000048821	4	12	12	TCCTTCACCTGCGAGATGGTGTC	5	-	1702	2757
ENSDARG00000003811	ENSDART00000048821	4	16	16	GAACACAACACACTGCGGAAGAA	5	-	2167	2757
ENSDARG00000003811	ENSDART00000048821	4	16	16	ATCATCTACAAACTGCTGCAGCG	5	-	2144	2757
ENSDARG00000003811	ENSDART00000048821	4	16	16	ATCTACAAACTGCTGCAGCGTTC	5	-	2141	2757
ENSDARG00000003811	ENSDART00000048821	4	17	17	GTTCACCCAGAAACGGAGAGGAA	5	-	2303	2757
ENSDARG00000003811	ENSDART00000048821	4	17	17	GCAGGCGTCCATGAAGGTCTGAGCG	7	-	2397	2757
ENSDARG00000003811	ENSDART00000048821	4	21	21	TCCAGCGCAGCGGCGATCTGTTGCA	7	-	2723	2757
ENSDARG00000003811	ENSDART00000048821	4	21	21	CGCAGCGGCGATCTGTTGCAGTC	5	-	2720	2757
ENSDARG00000003822	ENSDART00000037600	4	5	5	AGAGCCACAAAACTGGAGCTGAC	5	+	844	1110
ENSDARG00000003822	ENSDART00000037600	4	5	5	AGCCACAAAACTGGAGCTGACTGC	6	+	846	1110
ENSDARG00000003822	ENSDART00000037600	4	5	5	GTAGGCATCTCCCTCAGCAGTAGAT	7	+	723	1110
ENSDARG00000003822	ENSDART00000037600	4	6	6	GCAAAAGGCAGATCAGGTGGGGTT	6	+	952	1110
ENSDARG00000004055	ENSDART00000046871	4	2	2	TCCTCATCCAGCTCCAGGTTGGTAA	7	-	116	3288
ENSDARG00000004055	ENSDART00000046871	4	8	8	GCCTGCTGCGTGCGCATCTGCTGGG	7	-	872	3288
ENSDARG00000004055	ENSDART00000046871	4	8	8	CGCATCTGCTGGGCTGTGGGGGGTG	7	-	860	3288
ENSDARG00000004055	ENSDART00000046871	4	8	8	CGCATCTGCTGGGCTGTGGGGGGT	6	-	861	3288
ENSDARG00000004055	ENSDART00000046871	4	8	8	CGCATCTGCTGGGCTGTGGGGGG	5	-	862	3288
ENSDARG00000004055	ENSDART00000046871	4	13	13	TTCAACTGCACATAGAGGTTGGGAC	7	-	1520	3288
ENSDARG00000004055	ENSDART00000046871	4	13	13	TTCAACTGCACATAGAGGTTGGG	5	-	1522	3288
ENSDARG00000004055	ENSDART00000046871	4	14	14	AGAAGCTTCTTCCTCTGCAGACGAT	7	-	2234	3288
ENSDARG00000004055	ENSDART00000046871	4	14	14	TACTGCTCCAGATCTTGCTGAATAG	7	-	2501	3288
ENSDARG00000004055	ENSDART00000046871	4	14	14	GTCCACACAAGGTGTGGGACGAC	5	-	2099	3288
ENSDARG00000004055	ENSDART00000046871	4	14	14	CACATCTACTTCATTTGCTGAGCA	6	-	2374	3288
ENSDARG00000004055	ENSDART00000046871	4	14	14	GACATCAGAGTTCAAGGGGCTGGT	6	-	2638	3288
ENSDARG00000004227	ENSDART00000026207	4	1	1	TCCCACAGCAAGAATGGGACAAC	5	+	17	2592
ENSDARG00000004227	ENSDART00000026207	4	1	1	TGCTCCCACAGCAAGAATGGGAC	5	+	14	2592
ENSDARG00000004227	ENSDART00000026207	4	2	2	TGCTCCGACTCGGAGGAGGCGCC	5	+	274	2592
ENSDARG00000004227	ENSDART00000026207	4	3	3	GTTTGCATCCAGGGCTTTTGAGAC	6	+	341	2592
ENSDARG00000004227	ENSDART00000026207	4	5	5	CGCCAACGCCACTATGTAGCAGGT	6	+	809	2592
ENSDARG00000004227	ENSDART00000026207	4	5	5	GCCAACGCCACTATGTAGCAGGT	5	+	810	2592
ENSDARG00000004227	ENSDART00000026207	4	5	5	TCCACCATCTCTCCTCTGGCGTC	5	+	622	2592
ENSDARG00000004227	ENSDART00000026207	4	5	5	CAAGACCCCCTCAGTGGAGCTGCC	6	+	696	2592
ENSDARG00000004227	ENSDART00000026207	4	8	8	CCCATCTTCAGCCTGGTGGAGAA	5	+	1123	2592
ENSDARG00000004227	ENSDART00000026207	4	8	8	ATCTTCAGCCTGGTGGAGAAAAC	5	+	1126	2592
ENSDARG00000004227	ENSDART00000026207	4	8	8	AAAACCAACGGCAGATGTGGCTGCA	7	+	1144	2592
ENSDARG00000004227	ENSDART00000026207	4	8	8	AAAACCAACGGCAGATGTGGCTGC	6	+	1144	2592
ENSDARG00000004227	ENSDART00000026207	4	10	10	GACGTCCTCCATGCAGTCTGGTAC	6	+	1315	2592
ENSDARG00000004227	ENSDART00000026207	4	12	12	ACCTCAAGAAACACTTTGATTTC	5	+	1754	2592
ENSDARG00000004227	ENSDART00000026207	4	14	14	ACCCTCTGCCCAAAGATGGAGAT	5	+	2117	2592
ENSDARG00000004227	ENSDART00000026207	4	14	14	CTCTGCCCAAAGATGGAGATGAG	5	+	2120	2592
ENSDARG00000004227	ENSDART00000026207	4	14	14	GCCCAAAGATGGAGATGAGGTGGAG	7	+	2124	2592
ENSDARG00000004227	ENSDART00000026207	4	15	15	AGAGCCAGACTGAAGGGGAGGAGTC	7	+	2327	2592
ENSDARG00000004227	ENSDART00000026207	4	15	15	AGAGCCAGACTGAAGGGGAGGAG	5	+	2327	2592
ENSDARG00000004227	ENSDART00000026207	4	15	15	GAAAAACACAGAGACTGTAGAAGAC	7	+	2538	2592
ENSDARG00000004227	ENSDART00000026207	4	15	15	AAAAACACAGAGACTGTAGAAGAC	6	+	2539	2592
ENSDARG00000004227	ENSDART00000103408	4	1	1	TGCTCCGACTCGGAGGAGGCGCC	5	+	223	2541
ENSDARG00000004227	ENSDART00000103408	4	2	2	GTTTGCATCCAGGGCTTTTGAGAC	6	+	290	2541
ENSDARG00000004227	ENSDART00000103408	4	5	5	CGCCAACGCCACTATGTAGCAGGT	6	+	758	2541
ENSDARG00000004227	ENSDART00000103408	4	5	5	TCCACCATCTCTCCTCTGGCGTC	5	+	571	2541
ENSDARG00000004227	ENSDART00000103408	4	5	5	GCCAACGCCACTATGTAGCAGGT	5	+	759	2541
ENSDARG00000004227	ENSDART00000103408	4	5	5	CAAGACCCCCTCAGTGGAGCTGCC	6	+	645	2541
ENSDARG00000004227	ENSDART00000103408	4	8	8	AAAACCAACGGCAGATGTGGCTGC	6	+	1093	2541
ENSDARG00000004227	ENSDART00000103408	4	8	8	CCCATCTTCAGCCTGGTGGAGAA	5	+	1072	2541
ENSDARG00000004227	ENSDART00000103408	4	8	8	ATCTTCAGCCTGGTGGAGAAAAC	5	+	1075	2541
ENSDARG00000004227	ENSDART00000103408	4	8	8	AAAACCAACGGCAGATGTGGCTGCA	7	+	1093	2541
ENSDARG00000004227	ENSDART00000103408	4	10	10	GACGTCCTCCATGCAGTCTGGTAC	6	+	1264	2541
ENSDARG00000004227	ENSDART00000103408	4	12	12	ACCTCAAGAAACACTTTGATTTC	5	+	1703	2541
ENSDARG00000004227	ENSDART00000103408	4	14	14	ACCCTCTGCCCAAAGATGGAGAT	5	+	2066	2541
ENSDARG00000004227	ENSDART00000103408	4	14	14	GCCCAAAGATGGAGATGAGGTGGAG	7	+	2073	2541
ENSDARG00000004227	ENSDART00000103408	4	14	14	CTCTGCCCAAAGATGGAGATGAG	5	+	2069	2541
ENSDARG00000004227	ENSDART00000103408	4	15	15	GAAAAACACAGAGACTGTAGAAGAC	7	+	2487	2541
ENSDARG00000004227	ENSDART00000103408	4	15	15	AGAGCCAGACTGAAGGGGAGGAG	5	+	2276	2541
ENSDARG00000004227	ENSDART00000103408	4	15	15	AGAGCCAGACTGAAGGGGAGGAGTC	7	+	2276	2541
ENSDARG00000004227	ENSDART00000103408	4	15	15	AAAAACACAGAGACTGTAGAAGAC	6	+	2488	2541
ENSDARG00000004336	ENSDART00000021384	4	3	3	AGATGCTCCTCCACTGTAAGCGGGA	7	+	305	2904
ENSDARG00000004336	ENSDART00000021384	4	3	3	AGAACCTGCTGTCCTGTAAGATGCT	7	+	287	2904
ENSDARG00000004336	ENSDART00000021384	4	4	4	CAAATCTACCAGCCGCGTAGTTC	5	+	609	2904
ENSDARG00000004336	ENSDART00000021384	4	4	4	GACCTCTCCTGCAGGTGGAGGGC	5	+	500	2904
ENSDARG00000004336	ENSDART00000021384	4	6	6	AAAGCCATCATGGAGAGGCTGGA	5	+	880	2904
ENSDARG00000004336	ENSDART00000021384	4	7	7	TTCTCAGTCACCTTCAGCAGATTGT	7	+	1067	2904
ENSDARG00000004336	ENSDART00000021384	4	7	7	ACCTTCAGCAGATTGTTGTCTCT	5	+	1076	2904
ENSDARG00000004336	ENSDART00000021384	4	8	8	GTCCTACGCCAGCACCGGTGGAGAT	7	+	1239	2904
ENSDARG00000004336	ENSDART00000021384	4	8	8	TCCTACGCCAGCACCGGTGGAGAT	6	+	1240	2904
ENSDARG00000004336	ENSDART00000021384	4	8	8	CAAAAACACCCGTAGCGCAGCAGAA	7	+	1200	2904
ENSDARG00000004336	ENSDART00000021384	4	8	8	AAAAACACCCGTAGCGCAGCAGAA	6	+	1201	2904
ENSDARG00000004336	ENSDART00000021384	4	8	8	TACGCCAGCACCGGTGGAGATTTT	6	+	1243	2904
ENSDARG00000004336	ENSDART00000021384	4	8	8	GCCAGCACCGGTGGAGATTTTGGA	6	+	1246	2904
ENSDARG00000004336	ENSDART00000021384	4	9	9	ATCCCACGCCATTAGCATGAGCG	5	+	1332	2904
ENSDARG00000004336	ENSDART00000021384	4	10	10	AGAGACTAAGTTCCTGTGTAAAC	5	+	1440	2904
ENSDARG00000004336	ENSDART00000021384	4	11	11	GACCAATAAGGAAATTGAGGCTGTG	7	+	1620	2904
ENSDARG00000004336	ENSDART00000021384	4	12	12	TTCCAACCAGTTTCTGGAGATGGT	6	+	1791	2904
ENSDARG00000004336	ENSDART00000021384	4	13	13	TGCGACAGAAGAGAGAAGAAGAG	5	+	1982	2904
ENSDARG00000004336	ENSDART00000021384	4	14	14	TTCCCCAAAATGAGATTCTGAGGGA	7	+	2075	2904
ENSDARG00000004336	ENSDART00000021384	4	14	14	AGCTTCTTCAGCAGTCTGCCGCA	5	+	2167	2904
ENSDARG00000004336	ENSDART00000021384	4	14	14	TCCCCAAAATGAGATTCTGAGGGA	6	+	2076	2904
ENSDARG00000004336	ENSDART00000021384	4	15	15	CAAGACATCGCTGACCGCTGCCTGC	7	+	2293	2904
ENSDARG00000004336	ENSDART00000021384	4	15	15	GTTCGCAGCCGAGAGCAGATTCT	5	+	2239	2904
ENSDARG00000004336	ENSDART00000021384	4	15	15	GACCGCTGCCTGCTGGTGCTGCA	5	+	2305	2904
ENSDARG00000004336	ENSDART00000021384	4	18	18	AACACCGCCGACGAGCTGCTGAA	5	+	2701	2904
ENSDARG00000004336	ENSDART00000021384	4	18	18	CACCGCAGCCAGACAGGTGTAGGA	6	+	2788	2904
ENSDARG00000004336	ENSDART00000021384	4	18	18	CACCGCAGCCAGACAGGTGTAGGAG	7	+	2788	2904
ENSDARG00000004336	ENSDART00000101619	4	3	3	AGATGCTCCTCCACTGTAAGCGGGA	7	+	305	2904
ENSDARG00000004336	ENSDART00000101619	4	3	3	AGAACCTGCTGTCCTGTAAGATGCT	7	+	287	2904
ENSDARG00000004336	ENSDART00000101619	4	4	4	CAAATCTACCAGCCGCGTAGTTC	5	+	609	2904
ENSDARG00000004336	ENSDART00000101619	4	4	4	GACCTCTCCTGCAGGTGGAGGGC	5	+	500	2904
ENSDARG00000004336	ENSDART00000101619	4	6	6	AAAGCCATCATGGAGAGGCTGGA	5	+	880	2904
ENSDARG00000004336	ENSDART00000101619	4	7	7	ACCTTCAGCAGATTGTTGTCTCT	5	+	1076	2904
ENSDARG00000004336	ENSDART00000101619	4	7	7	TTCTCAGTCACCTTCAGCAGATTGT	7	+	1067	2904
ENSDARG00000004336	ENSDART00000101619	4	8	8	GTCCTACGCCAGCACCGGTGGAGAT	7	+	1239	2904
ENSDARG00000004336	ENSDART00000101619	4	8	8	GCCAGCACCGGTGGAGATTTTGGA	6	+	1246	2904
ENSDARG00000004336	ENSDART00000101619	4	8	8	TACGCCAGCACCGGTGGAGATTTT	6	+	1243	2904
ENSDARG00000004336	ENSDART00000101619	4	8	8	CAAAAACACCCGTAGCGCAGCAGAA	7	+	1200	2904
ENSDARG00000004336	ENSDART00000101619	4	8	8	AAAAACACCCGTAGCGCAGCAGAA	6	+	1201	2904
ENSDARG00000004336	ENSDART00000101619	4	8	8	TCCTACGCCAGCACCGGTGGAGAT	6	+	1240	2904
ENSDARG00000004336	ENSDART00000101619	4	9	9	ATCCCACGCCATTAGCATGAGCG	5	+	1332	2904
ENSDARG00000004336	ENSDART00000101619	4	10	10	AGAGACTAAGTTCCTGTGTAAAC	5	+	1440	2904
ENSDARG00000004336	ENSDART00000101619	4	11	11	GACCAATAAGGAAATTGAGGCTGTG	7	+	1620	2904
ENSDARG00000004336	ENSDART00000101619	4	12	12	TTCCAACCAGTTTCTGGAGATGGT	6	+	1791	2904
ENSDARG00000004336	ENSDART00000101619	4	13	13	TGCGACAGAAGAGAGAAGAAGAG	5	+	1982	2904
ENSDARG00000004336	ENSDART00000101619	4	14	14	TTCCCCAAAATGAGATTCTGAGGGA	7	+	2075	2904
ENSDARG00000004336	ENSDART00000101619	4	14	14	AGCTTCTTCAGCAGTCTGCCGCA	5	+	2167	2904
ENSDARG00000004336	ENSDART00000101619	4	14	14	TCCCCAAAATGAGATTCTGAGGGA	6	+	2076	2904
ENSDARG00000004336	ENSDART00000101619	4	15	15	CAAGACATCGCTGACCGCTGCCTGC	7	+	2293	2904
ENSDARG00000004336	ENSDART00000101619	4	15	15	GACCGCTGCCTGCTGGTGCTGCA	5	+	2305	2904
ENSDARG00000004336	ENSDART00000101619	4	15	15	GTTCGCAGCCGAGAGCAGATTCT	5	+	2239	2904
ENSDARG00000004336	ENSDART00000101619	4	19	19	AACACCGCCGACGAGCTGCTGAA	5	+	2701	2904
ENSDARG00000004336	ENSDART00000101619	4	19	19	CACCGCAGCCAGACAGGTGTAGGA	6	+	2788	2904
ENSDARG00000004336	ENSDART00000101619	4	19	19	CACCGCAGCCAGACAGGTGTAGGAG	7	+	2788	2904
ENSDARG00000004386	ENSDART00000004604	4	2	2	GACAGCACAGGCTCCAGATGGAGAG	7	+	139	3009
ENSDARG00000004386	ENSDART00000004604	4	4	4	GACAGCAACGTCTTCTTTGAATTC	6	+	541	3009
ENSDARG00000004386	ENSDART00000004604	4	5	5	CTCACCACAAGTGGAGAGTGGGGA	6	+	625	3009
ENSDARG00000004386	ENSDART00000004604	4	6	6	AGAACCACAGGAATGCTCTTGGGTG	7	+	694	3009
ENSDARG00000004386	ENSDART00000004604	4	11	11	ACATTCGCAGTGGAGTGGGTGGCT	6	+	1340	3009
ENSDARG00000004386	ENSDART00000004604	4	11	11	ACATTCGCAGTGGAGTGGGTGGC	5	+	1340	3009
ENSDARG00000004386	ENSDART00000004604	4	12	12	GCAGACTTCCAACTTCTGTCGAC	5	+	1406	3009
ENSDARG00000004386	ENSDART00000004604	4	19	19	CTACCACTCAATAGAAGGAGCGTGC	7	+	2565	3009
ENSDARG00000004386	ENSDART00000004604	4	19	19	GACTACCACTCAATAGAAGGAGCG	6	+	2563	3009
ENSDARG00000004386	ENSDART00000004604	4	20	20	AGCTCCGCCCACTGCGAGGTGGTC	6	+	2668	3009
ENSDARG00000004386	ENSDART00000004604	4	20	20	AAACTCTGCACTAAGGGAGTAGCG	6	+	2632	3009
ENSDARG00000004386	ENSDART00000004604	4	20	20	AAAAGCTCCGCCCACTGCGAGGTG	6	+	2665	3009
ENSDARG00000004386	ENSDART00000004604	4	21	21	TACGCCTTCGTTACTGGGTAAAC	5	+	2910	3009
ENSDARG00000004386	ENSDART00000004604	4	22	22	ATCTCAGTCAGAGCGGTGGGTTTG	6	+	2991	3009
ENSDARG00000004386	ENSDART00000004604	4	22	22	ATCTCAGTCAGAGCGGTGGGTTT	5	+	2991	3009
ENSDARG00000004497	ENSDART00000002770	4	1	1	TTCTTCAACATGATATTTTGGGTAA	7	+	88	843
ENSDARG00000004497	ENSDART00000002770	4	1	1	TTCTTCAACATGATATTTTGGGTA	6	+	88	843
ENSDARG00000004497	ENSDART00000002770	4	1	1	CAACGCAAAACGACGAGGACTAC	5	+	29	843
ENSDARG00000004497	ENSDART00000002770	4	1	1	AGCAACGCAAAACGACGAGGACTAC	7	+	27	843
ENSDARG00000004497	ENSDART00000002770	4	3	3	TTCTTCATCACTTTCTGTGGCTGT	6	+	229	843
ENSDARG00000004497	ENSDART00000002770	4	3	3	TTCTTCATCACTTTCTGTGGCTGTG	7	+	229	843
ENSDARG00000004497	ENSDART00000002770	4	4	4	TGCTGCAGCTTCTGGCTGGTGTT	5	+	320	843
ENSDARG00000004497	ENSDART00000002770	4	4	4	TTCTGCTGCAGCTTCTGGCTGGTGT	7	+	317	843
ENSDARG00000004497	ENSDART00000002770	4	6	6	CACGCCAAAGAGGAGGTGAGTGC	5	+	577	843
ENSDARG00000004562	ENSDART00000011860	4	3	3	CACCTCGACCCGTGGTGAGGAGGCC	7	+	495	1014
ENSDARG00000004562	ENSDART00000011860	4	3	3	ACACAAGCCTGTTGGGCAGCGGGT	6	+	377	1014
ENSDARG00000004562	ENSDART00000011860	4	3	3	AAACACCTCGACCCGTGGTGAGGAG	7	+	492	1014
ENSDARG00000004562	ENSDART00000011860	4	3	3	AAACACCTCGACCCGTGGTGAGGA	6	+	492	1014
ENSDARG00000004562	ENSDART00000011860	4	4	4	GTTGGCGCACAATGGCTGCATTT	5	+	632	1014
ENSDARG00000004562	ENSDART00000011860	4	4	4	GTTCCAAACGTAAGGTGCGACGCA	6	+	713	1014
ENSDARG00000004562	ENSDART00000011860	4	4	4	GGCTGCAACCTGCTGTGCTGCGGAC	7	+	883	1014
ENSDARG00000004562	ENSDART00000011860	4	4	4	GCAACCTGCTGTGCTGCGGACGGG	6	+	887	1014
ENSDARG00000004562	ENSDART00000011860	4	4	4	GACGGCTGCAACCTGCTGTGCTGCG	7	+	880	1014
ENSDARG00000004562	ENSDART00000011860	4	4	4	GAAACCAGCGTTCATGTTGTGGAC	6	+	688	1014
ENSDARG00000004562	ENSDART00000011860	4	4	4	CAAATCGCCCAATTATTGCTTGGAG	7	+	792	1014
ENSDARG00000004562	ENSDART00000011860	4	4	4	ACCGGCGGCTGGGCGTGACGGGGAC	7	+	818	1014
ENSDARG00000004562	ENSDART00000011860	4	4	4	AACTTCGGCCGGGCCCGACGGCTGC	7	+	864	1014
ENSDARG00000004562	ENSDART00000102543	4	3	3	AAACACCTCGACCCGTGGTGAGGA	6	+	516	1071
ENSDARG00000004562	ENSDART00000102543	4	3	3	AAACACCTCGACCCGTGGTGAGGAG	7	+	516	1071
ENSDARG00000004562	ENSDART00000102543	4	3	3	CACCTCGACCCGTGGTGAGGAGGCC	7	+	519	1071
ENSDARG00000004562	ENSDART00000102543	4	3	3	ACACAAGCCTGTTGGGCAGCGGGT	6	+	401	1071
ENSDARG00000004562	ENSDART00000102543	4	4	4	GGCTGCAACCTGCTGTGCTGCGGAC	7	+	907	1071
ENSDARG00000004562	ENSDART00000102543	4	4	4	GTTCCAAACGTAAGGTGCGACGCA	6	+	737	1071
ENSDARG00000004562	ENSDART00000102543	4	4	4	GTTGGCGCACAATGGCTGCATTT	5	+	656	1071
ENSDARG00000004562	ENSDART00000102543	4	4	4	GCAACCTGCTGTGCTGCGGACGGG	6	+	911	1071
ENSDARG00000004562	ENSDART00000102543	4	4	4	GACGGCTGCAACCTGCTGTGCTGCG	7	+	904	1071
ENSDARG00000004562	ENSDART00000102543	4	4	4	GAAACCAGCGTTCATGTTGTGGAC	6	+	712	1071
ENSDARG00000004562	ENSDART00000102543	4	4	4	CAAATCGCCCAATTATTGCTTGGAG	7	+	816	1071
ENSDARG00000004562	ENSDART00000102543	4	4	4	ACCGGCGGCTGGGCGTGACGGGGAC	7	+	842	1071
ENSDARG00000004562	ENSDART00000102543	4	4	4	AACTTCGGCCGGGCCCGACGGCTGC	7	+	888	1071
ENSDARG00000004562	ENSDART00000102546	4	3	3	AAACACCTCGACCCGTGGTGAGGA	6	+	528	1050
ENSDARG00000004562	ENSDART00000102546	4	3	3	AAACACCTCGACCCGTGGTGAGGAG	7	+	528	1050
ENSDARG00000004562	ENSDART00000102546	4	3	3	CACCTCGACCCGTGGTGAGGAGGCC	7	+	531	1050
ENSDARG00000004562	ENSDART00000102546	4	3	3	ACACAAGCCTGTTGGGCAGCGGGT	6	+	413	1050
ENSDARG00000004562	ENSDART00000102546	4	4	4	GGCTGCAACCTGCTGTGCTGCGGAC	7	+	919	1050
ENSDARG00000004562	ENSDART00000102546	4	4	4	GTTCCAAACGTAAGGTGCGACGCA	6	+	749	1050
ENSDARG00000004562	ENSDART00000102546	4	4	4	GTTGGCGCACAATGGCTGCATTT	5	+	668	1050
ENSDARG00000004562	ENSDART00000102546	4	4	4	GCAACCTGCTGTGCTGCGGACGGG	6	+	923	1050
ENSDARG00000004562	ENSDART00000102546	4	4	4	GACGGCTGCAACCTGCTGTGCTGCG	7	+	916	1050
ENSDARG00000004562	ENSDART00000102546	4	4	4	GAAACCAGCGTTCATGTTGTGGAC	6	+	724	1050
ENSDARG00000004562	ENSDART00000102546	4	4	4	CAAATCGCCCAATTATTGCTTGGAG	7	+	828	1050
ENSDARG00000004562	ENSDART00000102546	4	4	4	ACCGGCGGCTGGGCGTGACGGGGAC	7	+	854	1050
ENSDARG00000004562	ENSDART00000102546	4	4	4	AACTTCGGCCGGGCCCGACGGCTGC	7	+	900	1050
ENSDARG00000004592	ENSDART00000013924	4	2	1	CAAAGCAAAAAGGTGGAGATGAT	5	-	955	1290
ENSDARG00000004592	ENSDART00000013924	4	2	1	CACATCCTCTGATGAGAGGCATTT	6	-	1273	1290
ENSDARG00000004592	ENSDART00000013924	4	2	1	CACCACCACTATCGTAAGTGGGA	5	-	293	1290
ENSDARG00000004592	ENSDART00000013924	4	2	1	GACCACAGCAGTGAAGAAGAAGAT	6	-	655	1290
ENSDARG00000004592	ENSDART00000013924	4	2	1	GCCAGCACATTGGCAGCAGTGGCC	6	-	387	1290
ENSDARG00000004592	ENSDART00000013924	4	2	1	TCCAGCAAAGCAAAAAGGTGGAGAT	7	-	958	1290
ENSDARG00000004592	ENSDART00000013924	4	2	1	ATCCCAGCACAGGAGGGGTATGC	5	-	12	1290
ENSDARG00000004592	ENSDART00000013924	4	2	1	AGCTCATTCCACATCCTCTGATGAG	7	-	1281	1290
ENSDARG00000004592	ENSDART00000013924	4	2	1	AGCAGCAAATAAGTGCATTGTTG	5	-	333	1290
ENSDARG00000004592	ENSDART00000013924	4	2	1	AAAACCTTCTGAAATTTCTGCCTAG	7	-	1112	1290
ENSDARG00000004592	ENSDART00000013924	4	2	1	ACAGTCCCAATTCTGTGTAGTATTC	7	-	604	1290
ENSDARG00000004592	ENSDART00000013924	4	2	1	AGACGCACAGTGAAATTGCTGGGCC	7	-	1022	1290
ENSDARG00000004592	ENSDART00000013924	4	2	1	AGCAAAGCAAAAAGGTGGAGATGAT	7	-	955	1290
ENSDARG00000004592	ENSDART00000013924	4	2	1	AGCAAATAAGTGCATTGTTGCCTTC	7	-	328	1290
ENSDARG00000004592	ENSDART00000013924	4	2	1	AGCACCACCACTATCGTAAGTGGGA	7	-	293	1290
ENSDARG00000004794	ENSDART00000017947	4	1	1	TTCCAAGCACTGCAAGGCTGGATTT	7	-	147	2580
ENSDARG00000004794	ENSDART00000017947	4	2	2	TTCGTCCTCCTTCAGTTGGTTGT	5	-	410	2580
ENSDARG00000004794	ENSDART00000017947	4	2	2	TTCTCCAGCTCCTGCCTTTGCTGCT	7	-	317	2580
ENSDARG00000004794	ENSDART00000017947	4	2	2	GCATTCTCCAGCTCCTGCCTTTGCT	7	-	320	2580
ENSDARG00000004794	ENSDART00000017947	4	2	2	TCCTCCTTCAGTTGGTTGTAGTA	5	-	406	2580
ENSDARG00000004794	ENSDART00000017947	4	4	4	GTCCTCACCTCCTGTCTAAGCTTAA	7	-	587	2580
ENSDARG00000004794	ENSDART00000017947	4	6	6	TCCTCACACTAGATGAATTTGAA	5	-	1046	2580
ENSDARG00000004794	ENSDART00000017947	4	6	6	GTCCTCACACTAGATGAATTTGAA	6	-	1046	2580
ENSDARG00000004794	ENSDART00000017947	4	6	6	AAACGCTGCCTCTTTTGCTTTGGC	6	-	970	2580
ENSDARG00000004794	ENSDART00000017947	4	6	6	AAACGCTGCCTCTTTTGCTTTGGCC	7	-	969	2580
ENSDARG00000004794	ENSDART00000017947	4	8	8	CTCTCAAGCAAGATGTCGGCTTC	5	-	1264	2580
ENSDARG00000004794	ENSDART00000017947	4	11	11	TACATCTCCAAGTTGCTGTTTTC	5	-	1732	2580
ENSDARG00000004794	ENSDART00000017947	4	13	13	GTTGTCAGCTTTGATTTGGATGC	5	-	2087	2580
ENSDARG00000004794	ENSDART00000017947	4	15	15	GTAAACACCATTTGGAAGCTGGT	5	-	2414	2580
ENSDARG00000004794	ENSDART00000100078	4	2	1	TTCCAAGCACTGCAAGGCTGGATTT	7	-	147	1173
ENSDARG00000004794	ENSDART00000100078	4	3	2	TTCTCCAGCTCCTGCCTTTGCTGCT	7	-	317	1173
ENSDARG00000004794	ENSDART00000100078	4	3	2	TTCGTCCTCCTTCAGTTGGTTGT	5	-	410	1173
ENSDARG00000004794	ENSDART00000100078	4	3	2	TCCTCCTTCAGTTGGTTGTAGTA	5	-	406	1173
ENSDARG00000004794	ENSDART00000100078	4	3	2	GCATTCTCCAGCTCCTGCCTTTGCT	7	-	320	1173
ENSDARG00000004794	ENSDART00000100078	4	5	4	GTCCTCACCTCCTGTCTAAGCTTAA	7	-	587	1173
ENSDARG00000004794	ENSDART00000100078	4	7	6	AAACGCTGCCTCTTTTGCTTTGGCC	7	-	969	1173
ENSDARG00000004794	ENSDART00000100078	4	7	6	AAACGCTGCCTCTTTTGCTTTGGC	6	-	970	1173
ENSDARG00000004814	ENSDART00000014496	4	1	1	GTCGGCTCCTCAGGGTGTGGTAGAA	7	-	124	2847
ENSDARG00000004814	ENSDART00000014496	4	1	1	GTCGGCTCCTCAGGGTGTGGTAG	5	-	126	2847
ENSDARG00000004814	ENSDART00000014496	4	1	1	GCAGTCGGCTCCTCAGGGTGTGGTA	7	-	127	2847
ENSDARG00000004814	ENSDART00000014496	4	3	3	AGCATCAACTGCAACTGACGAATAC	7	-	452	2847
ENSDARG00000004814	ENSDART00000014496	4	7	7	CCCACCAGAGCAACGAGCAGTGGAT	7	-	1142	2847
ENSDARG00000004814	ENSDART00000014496	4	7	7	GCAAAATCCAGCGCTGGAAGCTGAT	7	-	1022	2847
ENSDARG00000004814	ENSDART00000014496	4	7	7	AAATCCAGCGCTGGAAGCTGATGAT	7	-	1019	2847
ENSDARG00000004814	ENSDART00000014496	4	9	9	CTATACACACTCTCTCTGAGGAA	5	-	1291	2847
ENSDARG00000004814	ENSDART00000014496	4	11	11	GTCCGCTCCTCCAGGAAGAGGTG	5	-	1593	2847
ENSDARG00000004814	ENSDART00000014496	4	16	16	ACCGACTCCCTCCTGTGAAGGAGCT	7	-	2291	2847
ENSDARG00000004814	ENSDART00000014496	4	19	19	GCCCAAAGAGGACAAAGAGGTAGAG	7	-	2616	2847
ENSDARG00000004814	ENSDART00000014496	4	19	19	ACCTCCTGCAGGGGGCTGTCTTG	5	-	2773	2847
ENSDARG00000004814	ENSDART00000082679	4	1	1	GTCGGCTCCTCAGGGTGTGGTAGAA	7	-	151	2928
ENSDARG00000004814	ENSDART00000082679	4	1	1	GTCGGCTCCTCAGGGTGTGGTAG	5	-	153	2928
ENSDARG00000004814	ENSDART00000082679	4	1	1	GCAGTCGGCTCCTCAGGGTGTGGTA	7	-	154	2928
ENSDARG00000004814	ENSDART00000082679	4	3	3	AGCATCAACTGCAACTGACGAATAC	7	-	479	2928
ENSDARG00000004814	ENSDART00000082679	4	7	7	GCAAAATCCAGCGCTGGAAGCTGAT	7	-	1049	2928
ENSDARG00000004814	ENSDART00000082679	4	7	7	CCCACCAGAGCAACGAGCAGTGGAT	7	-	1169	2928
ENSDARG00000004814	ENSDART00000082679	4	7	7	AAATCCAGCGCTGGAAGCTGATGAT	7	-	1046	2928
ENSDARG00000004814	ENSDART00000082679	4	9	9	CTATACACACTCTCTCTGAGGAA	5	-	1318	2928
ENSDARG00000004814	ENSDART00000082679	4	11	11	GTCCGCTCCTCCAGGAAGAGGTG	5	-	1620	2928
ENSDARG00000004814	ENSDART00000082679	4	18	18	GCCCAAAGAGGACAAAGAGGTAGAG	7	-	2532	2928
ENSDARG00000004814	ENSDART00000082679	4	18	18	ACCTCCTGCAGGGGGCTGTCTTG	5	-	2689	2928
ENSDARG00000004829	ENSDART00000012675	4	1	1	TGCCCATTCAAGGGATGCCGGAGTT	7	+	315	3420
ENSDARG00000004829	ENSDART00000012675	4	1	1	AGAGGCAAATAGCAATGCTTTTTTC	7	+	189	3420
ENSDARG00000004829	ENSDART00000012675	4	1	1	AGACGCTGCAGTGGTGTGTAGAG	5	+	144	3420
ENSDARG00000004829	ENSDART00000012675	4	1	1	ACAATCAGACTGATGAATGGTAA	5	+	28	3420
ENSDARG00000004829	ENSDART00000012675	4	3	3	AGATGCCGCAGTGCTGTGTAGAG	5	+	774	3420
ENSDARG00000004829	ENSDART00000012675	4	5	5	TTCCTCCACAGCCAGTGGGCAAC	5	+	1339	3420
ENSDARG00000004829	ENSDART00000012675	4	5	5	AGATGCTGCAGTGGTGTGTAGAG	5	+	1389	3420
ENSDARG00000004829	ENSDART00000012675	4	7	7	TTCTCCTTAATGGTCAGTGGGGAAC	7	+	1949	3420
ENSDARG00000004829	ENSDART00000012675	4	7	7	AGATGCTGCGGTGGTGTGTAAAC	5	+	2001	3420
ENSDARG00000004829	ENSDART00000012675	4	9	9	AAACGCTGCAGTGGTGTGTAGAG	5	+	2610	3420
ENSDARG00000004829	ENSDART00000012675	4	9	9	GACAAACGCTGCAGTGGTGTGTAG	6	+	2607	3420
ENSDARG00000004829	ENSDART00000012675	4	10	10	TTAGCCAAAATGTGGCTGTTTAA	5	+	2812	3420
ENSDARG00000004829	ENSDART00000012675	4	11	11	CACGTCAACCATCTGAATGATGC	5	+	3391	3420
ENSDARG00000004829	ENSDART00000012675	4	11	11	AGACGCTGCAGTGGTGTGTAGAG	5	+	3228	3420
ENSDARG00000004829	ENSDART00000012675	4	11	11	ACAGGCAACGGGCGGTGCTTTTGGA	7	+	3273	3420
ENSDARG00000004829	ENSDART00000103217	4	1	1	TGCCCATTCAAGGGATGCCGGAGTT	7	+	300	3447
ENSDARG00000004829	ENSDART00000103217	4	1	1	AGAGGCAAATAGCAATGCTTTTTTC	7	+	174	3447
ENSDARG00000004829	ENSDART00000103217	4	1	1	AGACGCTGCAGTGGTGTGTAGAG	5	+	129	3447
ENSDARG00000004829	ENSDART00000103217	4	1	1	ACAATCAGACTGATGAATGGTAA	5	+	13	3447
ENSDARG00000004829	ENSDART00000103217	4	4	4	AGATGCCGCAGTGCTGTGTAGAG	5	+	765	3447
ENSDARG00000004829	ENSDART00000103217	4	6	6	AGATGCTGCAGTGGTGTGTAGAG	5	+	1380	3447
ENSDARG00000004829	ENSDART00000103217	4	6	6	TTCCTCCACAGCCAGTGGGCAAC	5	+	1330	3447
ENSDARG00000004829	ENSDART00000103217	4	10	10	AGATGCTGCGGTGGTGTGTAAAC	5	+	2004	3447
ENSDARG00000004829	ENSDART00000103217	4	10	10	TTCTCCTTAATGGTCAGTGGGGAAC	7	+	1952	3447
ENSDARG00000004829	ENSDART00000103217	4	13	13	GACAAACGCTGCAGTGGTGTGTAG	6	+	2640	3447
ENSDARG00000004829	ENSDART00000103217	4	13	13	AAACGCTGCAGTGGTGTGTAGAG	5	+	2643	3447
ENSDARG00000004829	ENSDART00000103217	4	14	14	TTATTCCCAAAGCTGGTGGTGGCC	6	+	2845	3447
ENSDARG00000004829	ENSDART00000103217	4	14	14	TTATTCCCAAAGCTGGTGGTGGC	5	+	2845	3447
ENSDARG00000004829	ENSDART00000103217	4	16	16	CACGTCAACCATCTGAATGATGC	5	+	3418	3447
ENSDARG00000004829	ENSDART00000103217	4	16	16	ACAGGCAACGGGCGGTGCTTTTGGA	7	+	3300	3447
ENSDARG00000004829	ENSDART00000103217	4	16	16	AGACGCTGCAGTGGTGTGTAGAG	5	+	3255	3447
ENSDARG00000004829	ENSDART00000103218	4	1	1	TGCCCATTCAAGGGATGCCGGAGTT	7	+	327	1914
ENSDARG00000004829	ENSDART00000103218	4	1	1	AGAGGCAAATAGCAATGCTTTTTTC	7	+	201	1914
ENSDARG00000004829	ENSDART00000103218	4	1	1	AGACGCTGCAGTGGTGTGTAGAG	5	+	156	1914
ENSDARG00000004829	ENSDART00000103218	4	1	1	ACAATCAGACTGATGAATGGTAA	5	+	40	1914
ENSDARG00000004829	ENSDART00000103218	4	5	5	AGATGCTGCAGTGGTGTGTAGAG	5	+	1110	1914
ENSDARG00000004829	ENSDART00000103218	4	5	5	TTCCTCCACAGCCAGTGGGCAAC	5	+	1060	1914
ENSDARG00000004829	ENSDART00000103218	4	7	7	AGATGCTGCGGTGGTGTGTAAAC	5	+	1722	1914
ENSDARG00000004829	ENSDART00000103218	4	7	7	TTCTCCTTAATGGTCAGTGGGGAAC	7	+	1670	1914
ENSDARG00000004904	ENSDART00000014007	4	1	1	TTCCTCTTCAAACAGTGGAAGTC	5	-	50	2103
ENSDARG00000004904	ENSDART00000014007	4	2	2	TTCGTCCACAGTGATCTTTGCTTTT	7	-	159	2103
ENSDARG00000004904	ENSDART00000014007	4	3	3	GCCACCAGAGAGCCCAGGATGAGTG	7	-	464	2103
ENSDARG00000004904	ENSDART00000014007	4	4	4	CTCACCTTATCCAGGTTGTTGTA	5	-	673	2103
ENSDARG00000004904	ENSDART00000014007	4	4	4	GACCCAGCAGGGTGGCATGAGTG	5	-	621	2103
ENSDARG00000004904	ENSDART00000014007	4	5	5	GGCCTCCACTGCTGTGATTTGGGA	6	-	787	2103
ENSDARG00000004904	ENSDART00000014007	4	6	6	TTCCTAACATTCAGGCCGTTGGG	5	-	847	2103
ENSDARG00000004904	ENSDART00000014007	4	9	9	AACTTCTCCTTCACCGACTGAGCC	6	-	1188	2103
ENSDARG00000004904	ENSDART00000014007	4	12	12	GAACACTCCCAGGTGGCAGCCGCG	6	-	1504	2103
ENSDARG00000004904	ENSDART00000014007	4	13	13	GCCAAACCCAGATAGATTTGTGGTC	7	-	1593	2103
ENSDARG00000004904	ENSDART00000014007	4	14	14	GAAACCGCCGGTCCACGATGTAGAT	7	-	1660	2103
ENSDARG00000004904	ENSDART00000014007	4	15	15	CTCACCGACGTAAGGTTTAGATGCT	7	-	1883	2103
ENSDARG00000004904	ENSDART00000014007	4	16	16	GTCCTCTTACCGTCGGTGTCTGC	5	-	2068	2103
ENSDARG00000004904	ENSDART00000014007	4	16	16	TGCGCCCACACTGAACGGGGCCTTG	7	-	2046	2103
ENSDARG00000004904	ENSDART00000014007	4	16	16	GTCATCCTCTTCATCGCTGTGGTG	6	-	1975	2103
ENSDARG00000004904	ENSDART00000014007	4	16	16	CTCTTCATCGCTGTGGTGAGGGG	5	-	1970	2103
ENSDARG00000004904	ENSDART00000014007	4	16	16	CTCCTCTTCATCATAGGTGTCGTC	6	-	1996	2103
ENSDARG00000004904	ENSDART00000014007	4	16	16	CGCCCACACTGAACGGGGCCTTG	5	-	2046	2103
ENSDARG00000004904	ENSDART00000014007	4	16	16	ATCCTCTTCATCGCTGTGGTGAGGG	7	-	1971	2103
ENSDARG00000004904	ENSDART00000014007	4	16	16	ATCCTCTTCATCGCTGTGGTGAG	5	-	1973	2103
ENSDARG00000005451	ENSDART00000008584	4	1	1	GAATACGACGTTATCGTGTTGGGAA	7	+	19	1344
ENSDARG00000005451	ENSDART00000008584	4	1	1	GAATACGACGTTATCGTGTTGGGA	6	+	19	1344
ENSDARG00000005451	ENSDART00000008584	4	2	2	GCATCCATCACCCCTCTGGAGGA	5	+	139	1344
ENSDARG00000005451	ENSDART00000008584	4	2	2	TCCATCACCCCTCTGGAGGATGTA	6	+	142	1344
ENSDARG00000005451	ENSDART00000008584	4	2	2	TCCATCACCCCTCTGGAGGATGT	5	+	142	1344
ENSDARG00000005451	ENSDART00000008584	4	5	5	CCCAAAGACCATGGAAGGAGTGGAC	7	+	471	1344
ENSDARG00000005451	ENSDART00000008584	4	5	5	CTCTACCGCACAGACGAGTGAGTC	6	+	580	1344
ENSDARG00000005451	ENSDART00000008584	4	5	5	ACCCAAAGACCATGGAAGGAGTG	5	+	470	1344
ENSDARG00000005451	ENSDART00000008584	4	5	5	AAAGACCACCATGCGGGATGTGTAC	7	+	501	1344
ENSDARG00000005451	ENSDART00000008584	4	6	6	CCCCAAGGCTTTGCCAGGTGAGTTT	7	+	712	1344
ENSDARG00000005451	ENSDART00000008584	4	7	7	GGCGTCAAATCTGAGGGAGAGGTG	6	+	808	1344
ENSDARG00000005451	ENSDART00000008584	4	8	8	ATCAAAAACACCAGCGATGCCAAC	6	+	931	1344
ENSDARG00000005453	ENSDART00000060861	4	4	1	AGCCAATTAGATGCTGGCAGTAGAG	7	+	82	2091
ENSDARG00000005453	ENSDART00000060861	4	4	1	GTAAGCGCAGTCGAGCTGCTGCA	5	+	139	2091
ENSDARG00000005453	ENSDART00000060861	4	4	1	AGCCTAAGCAGCCAATTAGATGCT	6	+	73	2091
ENSDARG00000005453	ENSDART00000060861	4	4	1	CTAAGCAGCCAATTAGATGCTGGC	6	+	76	2091
ENSDARG00000005453	ENSDART00000060861	4	5	2	ACAAACAGCGTCCGTTGCAGGTGAG	7	+	248	2091
ENSDARG00000005453	ENSDART00000060861	4	5	2	TCCTACAGCAACCAGGCAGTGGCC	6	+	203	2091
ENSDARG00000005453	ENSDART00000060861	4	7	4	AACTTCATCTACAGCTTTTGCAGCA	7	+	443	2091
ENSDARG00000005453	ENSDART00000060861	4	7	4	AACAACTTCATCTACAGCTTTTGCA	7	+	440	2091
ENSDARG00000005453	ENSDART00000060861	4	7	4	TTCCACAGCAACACCTGCAGGAGTT	7	+	398	2091
ENSDARG00000005453	ENSDART00000060861	4	8	5	TGCAGCAACTGCAGCAGCAGCAGCA	7	+	560	2091
ENSDARG00000005453	ENSDART00000060861	4	8	5	AGCAGCAGCAGCAGCAGTTGGCGGC	7	+	500	2091
ENSDARG00000005453	ENSDART00000060861	4	8	5	AGCACCTGCTCAACATGCAGAGGCA	7	+	581	2091
ENSDARG00000005453	ENSDART00000060861	4	8	5	AGCAACAGCAGCAGCAGCAGCAGTT	7	+	494	2091
ENSDARG00000005453	ENSDART00000060861	4	8	5	TGCAAATGCAGCAACTGCAGCAGCA	7	+	554	2091
ENSDARG00000005453	ENSDART00000060861	4	8	5	AACAGCAGCAGCAGCAGCAGTTGGC	7	+	497	2091
ENSDARG00000005453	ENSDART00000060861	4	8	5	AAATGCAGCAACTGCAGCAGCAGCA	7	+	557	2091
ENSDARG00000005453	ENSDART00000060861	4	12	9	ACCATCACCAAAACCGGTGAGTGC	6	+	1149	2091
ENSDARG00000005453	ENSDART00000060861	4	14	11	ATCGCCCCAAACTACGAGTTTTAC	6	+	1378	2091
ENSDARG00000005453	ENSDART00000060861	4	14	11	GCCGACGTCAGGCCGCCGTTTAC	5	+	1408	2091
ENSDARG00000005453	ENSDART00000060861	4	14	11	GCAACCCTCATCAGGCAGGTGAG	5	+	1435	2091
ENSDARG00000005453	ENSDART00000060861	4	14	11	AACGCCGACGTCAGGCCGCCGTT	5	+	1405	2091
ENSDARG00000005453	ENSDART00000060861	4	16	13	AGAAACGCAGGTCACAGAAGATTAC	7	+	1649	2091
ENSDARG00000005453	ENSDART00000060861	4	17	14	AAAACCTGCCGTCCAGTCTGGGTT	6	+	1694	2091
ENSDARG00000005453	ENSDART00000060861	4	18	15	TCCCCACACACCCACCTGTGAGTTC	7	+	1942	2091
ENSDARG00000005453	ENSDART00000060861	4	18	15	CCCCACACACCCACCTGTGAGTTC	6	+	1943	2091
ENSDARG00000005453	ENSDART00000060861	4	19	16	CTCCCATTCACGTCAAGGAGGAGCC	7	+	1961	2091
ENSDARG00000005476	ENSDART00000005847	4	5	5	TGCCGCCCCTGTGGTCTGATGTG	5	-	554	6810
ENSDARG00000005476	ENSDART00000005847	4	5	5	TACTGCTGCTGGTGCTGCTGCTGCT	7	-	494	6810
ENSDARG00000005476	ENSDART00000005847	4	5	5	AGAGACTGCAGGTACTGCTGCTGGT	7	-	506	6810
ENSDARG00000005476	ENSDART00000005847	4	5	5	TGCTGCTGCTGCTTGTAGCGGGA	5	-	481	6810
ENSDARG00000005476	ENSDART00000005847	4	7	7	TACTGCCGCTGCCTGCAGCGGGG	5	-	705	6810
ENSDARG00000005476	ENSDART00000005847	4	7	7	TGCCGCTGCCTGCAGCGGGGACTCT	7	-	700	6810
ENSDARG00000005476	ENSDART00000005847	4	7	7	GGCTTCTTCTGTTCAGGTTTGAGGA	7	-	742	6810
ENSDARG00000005476	ENSDART00000005847	4	8	8	GTCTTCTCCCCACCGGTAGTTGCA	6	-	1563	6810
ENSDARG00000005476	ENSDART00000005847	4	8	8	CCCCCAGTCCTGAAGTGGTGGAT	5	-	1695	6810
ENSDARG00000005476	ENSDART00000005847	4	8	8	CCCCCAGTCCTGAAGTGGTGGATGC	7	-	1693	6810
ENSDARG00000005476	ENSDART00000005847	4	8	8	TGCAAATGCAGATGCAGAGGGCTTC	7	-	1236	6810
ENSDARG00000005476	ENSDART00000005847	4	8	8	AGCTGCTGCCCGCTGGTGCTGGA	5	-	856	6810
ENSDARG00000005476	ENSDART00000005847	4	8	8	CACCCCCCAGTCCTGAAGTGGTG	5	-	1698	6810
ENSDARG00000005476	ENSDART00000005847	4	8	8	TTCTTCACAGAGGCAGCGGATGTT	6	-	1443	6810
ENSDARG00000005476	ENSDART00000005847	4	8	8	TTCTCCCCACCGGTAGTTGCAGGT	6	-	1560	6810
ENSDARG00000005476	ENSDART00000005847	4	8	8	GCCAGCTGCTGCCCGCTGGTGCT	5	-	859	6810
ENSDARG00000005476	ENSDART00000005847	4	8	8	ACCACCCCCCAGTCCTGAAGTGGTG	7	-	1698	6810
ENSDARG00000005476	ENSDART00000005847	4	11	11	ATCTCCAGCCTGGAGACGAGGAC	5	-	2150	6810
ENSDARG00000005476	ENSDART00000005847	4	11	11	GGCATCTCCAGCCTGGAGACGAG	5	-	2153	6810
ENSDARG00000005476	ENSDART00000005847	4	12	12	AAATACCTCCGTCTGTGTGATAC	5	-	2409	6810
ENSDARG00000005476	ENSDART00000005847	4	14	14	GTCTTCACCCTGACATGAAGAGGAA	7	-	2793	6810
ENSDARG00000005476	ENSDART00000005847	4	15	15	GTTACCTGCGGAATGTGGGGGAT	5	-	3651	6810
ENSDARG00000005476	ENSDART00000005847	4	15	15	GTTACCTGCGGAATGTGGGGGATGC	7	-	3649	6810
ENSDARG00000005476	ENSDART00000005847	4	15	15	GCCAAAAGAACTTGTGGTAGGTGGC	7	-	3072	6810
ENSDARG00000005476	ENSDART00000005847	4	15	15	TTATCAGTCTGGTTGATGGTGAC	5	-	3511	6810
ENSDARG00000005476	ENSDART00000005847	4	15	15	TTCCTCCACTAGATGACTTTGCT	5	-	3330	6810
ENSDARG00000005476	ENSDART00000005847	4	15	15	TGCTTCCTCCACTAGATGACTTT	5	-	3333	6810
ENSDARG00000005476	ENSDART00000005847	4	15	15	TTACCCTTCTCAGATGCCTTGGCA	6	-	2952	6810
ENSDARG00000005476	ENSDART00000005847	4	15	15	TCCTTCATCTCCACTGCTTTTGCC	6	-	3022	6810
ENSDARG00000005476	ENSDART00000005847	4	15	15	CTCCACTTCCTCCCGCAGACTTT	5	-	3417	6810
ENSDARG00000005476	ENSDART00000005847	4	15	15	AACAGCATCGTCTTGATGTTGAGCA	7	-	3249	6810
ENSDARG00000005476	ENSDART00000005847	4	15	15	GCCAAAAGAACTTGTGGTAGGTG	5	-	3074	6810
ENSDARG00000005476	ENSDART00000005847	4	15	15	AACAGCATCGTCTTGATGTTGAG	5	-	3251	6810
ENSDARG00000005476	ENSDART00000005847	4	15	15	TTCATCTCCACTGCTTTTGCCTGC	6	-	3019	6810
ENSDARG00000005476	ENSDART00000005847	4	16	16	TTACCCCTCAGACAGGGTGGACTTG	7	-	4083	6810
ENSDARG00000005476	ENSDART00000005847	4	16	16	GGCTGCCCAGTGCTGAGGGGCATTT	7	-	3727	6810
ENSDARG00000005476	ENSDART00000005847	4	16	16	GCCTGCAGAAGAACTGCTGAGAT	5	-	3947	6810
ENSDARG00000005476	ENSDART00000005847	4	18	18	ACATACACAGGTTTGAGTAGTGGTA	7	-	4261	6810
ENSDARG00000005476	ENSDART00000005847	4	18	18	GTAGACCTCCAGTGGAGTGAGAA	5	-	4182	6810
ENSDARG00000005476	ENSDART00000005847	4	19	19	CTAACCTTCATCTGTGCTGTCTCT	6	-	4450	6810
ENSDARG00000005476	ENSDART00000005847	4	21	21	GTTCTCGCCGCAGTTTTCTGATTTG	7	-	4522	6810
ENSDARG00000005476	ENSDART00000005847	4	22	22	AAATGCTGCCACCAGGTGTGCCTGT	7	-	4596	6810
ENSDARG00000005476	ENSDART00000005847	4	25	25	TACTCACTCTGTGGTGGACGGTGAT	7	-	5079	6810
ENSDARG00000005476	ENSDART00000005847	4	29	29	TGCTTCTTCTGCATAGCCTTTGAC	6	-	5529	6810
ENSDARG00000005476	ENSDART00000005847	4	30	30	AACCACATCCCCCATTCTGTAGCA	6	-	5692	6810
ENSDARG00000005476	ENSDART00000005847	4	31	31	TCCATCAGCAGGTTTAAGTAGCG	5	-	5866	6810
ENSDARG00000005476	ENSDART00000005847	4	32	32	ATCTCACACTCCTCTGTGTTGCA	5	-	6073	6810
ENSDARG00000005476	ENSDART00000005847	4	32	32	GTCATCACCATTTGTGGTATTTGCA	7	-	6175	6810
ENSDARG00000005476	ENSDART00000005847	4	35	35	AAACCACACACGTGAGCCGTCTGC	6	-	6493	6810
ENSDARG00000005476	ENSDART00000005847	4	35	35	AACCACACACGTGAGCCGTCTGC	5	-	6493	6810
ENSDARG00000005476	ENSDART00000005847	4	36	36	ACCCACATCCTCCGGCCGCAGCT	5	-	6602	6810
ENSDARG00000005476	ENSDART00000005847	4	36	36	AGCTCCATCTTTAGAGGAGCTGTA	6	-	6634	6810
ENSDARG00000005476	ENSDART00000005847	4	36	36	CACATCCTCCGGCCGCAGCTGCA	5	-	6599	6810
ENSDARG00000005476	ENSDART00000036886	4	3	3	TACTGCCGCTGCCTGCAGCGGGG	5	-	174	1581
ENSDARG00000005476	ENSDART00000036886	4	3	3	TGCCGCTGCCTGCAGCGGGGACTCT	7	-	169	1581
ENSDARG00000005476	ENSDART00000036886	4	3	3	GGCTTCTTCTGTTCAGGTTTGAGGA	7	-	211	1581
ENSDARG00000005476	ENSDART00000036886	4	4	4	TTCTCCCCACCGGTAGTTGCAGGT	6	-	1056	1581
ENSDARG00000005476	ENSDART00000036886	4	4	4	TGCAAATGCAGATGCAGAGGGCTTC	7	-	732	1581
ENSDARG00000005476	ENSDART00000036886	4	4	4	TTCTTCACAGAGGCAGCGGATGTT	6	-	939	1581
ENSDARG00000005476	ENSDART00000036886	4	4	4	GTCTTCTCCCCACCGGTAGTTGCA	6	-	1059	1581
ENSDARG00000005476	ENSDART00000036886	4	4	4	GCCAGCTGCTGCCCGCTGGTGCT	5	-	355	1581
ENSDARG00000005476	ENSDART00000036886	4	4	4	ACCACCCCCCAGTCCTGAAGTGGTG	7	-	1194	1581
ENSDARG00000005476	ENSDART00000036886	4	4	4	AGCTGCTGCCCGCTGGTGCTGGA	5	-	352	1581
ENSDARG00000005476	ENSDART00000036886	4	4	4	CACCCCCCAGTCCTGAAGTGGTG	5	-	1194	1581
ENSDARG00000005476	ENSDART00000036886	4	4	4	CCCCCAGTCCTGAAGTGGTGGAT	5	-	1191	1581
ENSDARG00000005476	ENSDART00000036886	4	4	4	CCCCCAGTCCTGAAGTGGTGGATGC	7	-	1189	1581
ENSDARG00000005476	ENSDART00000100189	4	1	1	CTAACCTTCATCTGTGCTGTCTCT	6	-	166	357
ENSDARG00000005476	ENSDART00000100189	4	6	6	GTTCTCGCCGCAGTTTTCTGATTTG	7	-	312	357
ENSDARG00000005541	ENSDART00000016382	4	1	1	TCCTTCTGCTTTTAGGGGGTCTGC	6	+	56	1134
ENSDARG00000005541	ENSDART00000016382	4	3	3	TGCCTCACAAAGCATCTGGTGCG	5	+	383	1134
ENSDARG00000005541	ENSDART00000016382	4	3	3	GTTTCAGACTCTGCGTTCTTTGGAT	7	+	309	1134
ENSDARG00000005541	ENSDART00000016382	4	7	7	AAATGCATCTGCGCCGTGGGCTTTG	7	+	784	1134
ENSDARG00000005541	ENSDART00000016382	4	7	7	ATCTGCGCCGTGGGCTTTGAAGGG	6	+	790	1134
ENSDARG00000005541	ENSDART00000016382	4	7	7	TGCATCTGCGCCGTGGGCTTTGAA	6	+	787	1134
ENSDARG00000005541	ENSDART00000016382	4	7	7	GGCAAATGCATCTGCGCCGTGGGC	6	+	781	1134
ENSDARG00000005541	ENSDART00000016382	4	7	7	AAATGCATCTGCGCCGTGGGCTTT	6	+	784	1134
ENSDARG00000005541	ENSDART00000016382	4	10	10	ACACAAGTCTCCGTCTGTGGCGGC	6	+	1068	1134
ENSDARG00000005541	ENSDART00000016382	4	10	10	GTCTCCGTCTGTGGCGGCGGCGAA	6	+	1074	1134
ENSDARG00000005541	ENSDART00000016382	4	10	10	CAAGTCTCCGTCTGTGGCGGCGGCG	7	+	1071	1134
ENSDARG00000005541	ENSDART00000016382	4	10	10	CAAGTCTCCGTCTGTGGCGGCGGC	6	+	1071	1134
ENSDARG00000005541	ENSDART00000016382	4	10	10	ACACAAGTCTCCGTCTGTGGCGGCG	7	+	1068	1134
ENSDARG00000005547	ENSDART00000045639	4	1	1	AGAGTCAGATTTAGTGCTGTCTAC	6	-	73	2346
ENSDARG00000005547	ENSDART00000045639	4	2	2	GCACCCTGCAGATGCTGCTGCAGTT	7	-	350	2346
ENSDARG00000005547	ENSDART00000045639	4	2	2	CCCTGCAGATGCTGCTGCAGTTTGT	7	-	347	2346
ENSDARG00000005547	ENSDART00000045639	4	2	2	TGCTGCTGCAGTTTGTTAGACAAC	6	-	339	2346
ENSDARG00000005547	ENSDART00000045639	4	2	2	ACACGCAGCGGCCCCGAAGACGAC	6	-	246	2346
ENSDARG00000005547	ENSDART00000045639	4	2	2	CTCTGCTGCACGCAGAGCTGCAGAC	7	-	270	2346
ENSDARG00000005547	ENSDART00000045639	4	2	2	AGCTGCAGACACACGCAGCGGCC	5	-	257	2346
ENSDARG00000005547	ENSDART00000045639	4	4	4	AGCAGCTCCAGCTGGCTGTTGAGCT	7	-	743	2346
ENSDARG00000005547	ENSDART00000045639	4	4	4	AGCAGCTCCAGCTGGCTGTTGAG	5	-	745	2346
ENSDARG00000005547	ENSDART00000045639	4	4	4	AGAGACAGAAGCTGGGAGACGAG	5	-	766	2346
ENSDARG00000005547	ENSDART00000045639	4	6	6	TTCTCATCCATAAAGTTGGAGTT	5	-	997	2346
ENSDARG00000005547	ENSDART00000045639	4	6	6	GTCAAATACCACTCTGGCTGTAGAC	7	-	947	2346
ENSDARG00000005547	ENSDART00000045639	4	7	7	CTCGTCCACTAGATGGCAGAAGAG	6	-	1147	2346
ENSDARG00000005547	ENSDART00000045639	4	8	8	CTCTGCACAGTCTGGTGCTTTGAG	6	-	1375	2346
ENSDARG00000005547	ENSDART00000045639	4	9	9	GTTGGCAGCGTTGAGGATGGCGGA	6	-	1567	2346
ENSDARG00000005547	ENSDART00000045639	4	10	10	CTCGCCCACTGAAACTGCAGCCTGC	7	-	1647	2346
ENSDARG00000005547	ENSDART00000045639	4	11	11	AACATCTGCTGCAGTTGGAGCAGGT	7	-	1934	2346
ENSDARG00000005547	ENSDART00000045639	4	11	11	AGACACAACATCTGCTGCAGTTGGA	7	-	1940	2346
ENSDARG00000005547	ENSDART00000045639	4	11	11	CAAAACATCTGAAATAGAGGAAGAC	7	-	1961	2346
ENSDARG00000005547	ENSDART00000045639	4	11	11	CACAACATCTGCTGCAGTTGGAGCA	7	-	1937	2346
ENSDARG00000005547	ENSDART00000045639	4	11	11	GACATCCTCATAGATGAAGCAGTC	6	-	2008	2346
ENSDARG00000005547	ENSDART00000045639	4	11	11	GAAGACACAACATCTGCTGCAGTT	6	-	1943	2346
ENSDARG00000005891	ENSDART00000014153	4	2	2	CAACAAGACGCAATGGGTATTTTAC	7	-	121	894
ENSDARG00000005891	ENSDART00000014153	4	5	5	CTACAAACCTTTGCCTTTGTAAAC	6	-	448	894
ENSDARG00000005891	ENSDART00000014153	4	8	8	TCCTCCAACTCAGGGCGTAGGAGAA	7	-	647	894
ENSDARG00000005891	ENSDART00000014153	4	8	8	TCCTCCAACTCAGGGCGTAGGAG	5	-	649	894
ENSDARG00000005891	ENSDART00000014153	4	8	8	GTTACCGTCTGGTGCTCTGTCGAC	6	-	715	894
ENSDARG00000005891	ENSDART00000014153	4	8	8	CTCCAACTCAGGGCGTAGGAGAA	5	-	647	894
ENSDARG00000005897	ENSDART00000024312	4	4	4	ACACACACACAGCTGCAGTCGAG	5	-	291	954
ENSDARG00000005897	ENSDART00000024312	4	4	4	AGCGTCAGCCACCCGTGATGGGTAC	7	-	312	954
ENSDARG00000005897	ENSDART00000024312	4	4	4	CACAGCTGCAGTCGAGATGCCTTG	6	-	283	954
ENSDARG00000005897	ENSDART00000024312	4	4	4	GTACACACACACAGCTGCAGTCGAG	7	-	291	954
ENSDARG00000005897	ENSDART00000024312	4	6	6	TTCTCCTACCGCCAGGATGCTTTT	6	-	571	954
ENSDARG00000005897	ENSDART00000024312	4	8	8	CAAACCACAGACTCCTGCGCTGTT	6	-	789	954
ENSDARG00000006011	ENSDART00000007030	4	1	1	TGCTACTAAAGTGGCTGTGCCTTT	6	-	478	1416
ENSDARG00000006011	ENSDART00000007030	4	1	1	GTTGTCCACCTGAACTTTGGAGGT	6	-	205	1416
ENSDARG00000006011	ENSDART00000007030	4	1	1	GTTCTCGCACATTAGCTGCCAAC	5	-	435	1416
ENSDARG00000006011	ENSDART00000007030	4	1	1	GTTCCACTCATTCTTGGAGGGGTTG	7	-	726	1416
ENSDARG00000006011	ENSDART00000007030	4	1	1	GTTCCACTCATTCTTGGAGGGGTT	6	-	727	1416
ENSDARG00000006011	ENSDART00000007030	4	1	1	GCCTGCGCAGCATAGGATGATAA	5	-	399	1416
ENSDARG00000006011	ENSDART00000007030	4	1	1	GCCAAATCCAGACAGGTGTGAGTAA	7	-	512	1416
ENSDARG00000006011	ENSDART00000007030	4	1	1	CACTCATTCTTGGAGGGGTTGTAA	6	-	723	1416
ENSDARG00000006011	ENSDART00000007030	4	1	1	GCCAAATCCAGACAGGTGTGAGTA	6	-	513	1416
ENSDARG00000006011	ENSDART00000007030	4	1	1	CGCCAAATCCAGACAGGTGTGAGTA	7	-	513	1416
ENSDARG00000006011	ENSDART00000007030	4	1	1	CACTCATTCTTGGAGGGGTTGTA	5	-	724	1416
ENSDARG00000006011	ENSDART00000007030	4	3	3	AGCCTCCCACCAGGTAGATGGTGTC	7	-	1075	1416
ENSDARG00000006011	ENSDART00000007030	4	3	3	TGCCTCAGAGCACGTTGGGCAGGT	6	-	1409	1416
ENSDARG00000006011	ENSDART00000007030	4	3	3	TCCTCCACAGAGAGCATCTGCTGCT	7	-	1052	1416
ENSDARG00000006011	ENSDART00000007030	4	3	3	GCCTCCCACCAGGTAGATGGTGTC	6	-	1075	1416
ENSDARG00000006011	ENSDART00000007030	4	3	3	CTCCACAGAGAGCATCTGCTGCT	5	-	1052	1416
ENSDARG00000006011	ENSDART00000007030	4	3	3	GTTCAAGCCTGATTTCGATGTGTTT	7	-	1215	1416
ENSDARG00000006011	ENSDART00000007030	4	3	3	GTAGCCTCCCACCAGGTAGATGGT	6	-	1078	1416
ENSDARG00000006029	ENSDART00000028171	4	1	1	AAAGTCGCCCTGACTGTGGAGGT	5	+	118	1839
ENSDARG00000006029	ENSDART00000028171	4	1	1	AAAGTCGCCCTGACTGTGGAGGTC	6	+	118	1839
ENSDARG00000006029	ENSDART00000028171	4	3	3	ACACCCAAACAGACTGCTGGGAA	5	+	364	1839
ENSDARG00000006029	ENSDART00000028171	4	7	7	ATCGGCCCAAGGTCTAGAGTTTGGT	7	+	655	1839
ENSDARG00000006029	ENSDART00000028171	4	12	12	TCCCAAATCTGCATGAGGTGGAC	5	+	1112	1839
ENSDARG00000006029	ENSDART00000103062	4	1	1	ACACCCAAACAGACTGCTGGGAA	5	+	16	1488
ENSDARG00000006029	ENSDART00000103062	4	5	5	ATCGGCCCAAGGTCTAGAGTTTGGT	7	+	301	1488
ENSDARG00000006029	ENSDART00000103062	4	10	10	TCCCAAATCTGCATGAGGTGGAC	5	+	758	1488
ENSDARG00000006038	ENSDART00000019518	4	2	2	TACCCCAGCTATGATGAATGGTCT	6	+	486	1245
ENSDARG00000006038	ENSDART00000019518	4	2	2	CTCATCTTACCCCTGCTGCTGGG	5	+	537	1245
ENSDARG00000006038	ENSDART00000019518	4	4	4	ACCTTCGCCTCCCAGGGGGGGCTAG	7	+	775	1245
ENSDARG00000006038	ENSDART00000019518	4	4	4	AGCGGCGGCGGTCTTTGCGTGAGTG	7	+	920	1245
ENSDARG00000006038	ENSDART00000019518	4	4	4	ACCTTCGCCTCCCAGGGGGGGCT	5	+	775	1245
ENSDARG00000006038	ENSDART00000019518	4	5	5	CGCGACCGCATGACTTTTTTGAT	5	+	938	1245
ENSDARG00000006038	ENSDART00000019518	4	5	5	GGCAAAGGCCACAGCGTTGTGTTT	6	+	1030	1245
ENSDARG00000006038	ENSDART00000019518	4	7	7	ACCCAAACATTTACAGGTGAAGCT	6	+	1229	1245
ENSDARG00000006038	ENSDART00000019518	4	7	7	GACCCAAACATTTACAGGTGAAGCT	7	+	1228	1245
ENSDARG00000006038	ENSDART00000103409	4	2	2	TACCCCAGCTATGATGAATGGTCT	6	+	486	1245
ENSDARG00000006038	ENSDART00000103409	4	2	2	CTCATCTTACCCCTGCTGCTGGG	5	+	537	1245
ENSDARG00000006038	ENSDART00000103409	4	4	4	ACCTTCGCCTCCCAGGGGGGGCT	5	+	775	1245
ENSDARG00000006038	ENSDART00000103409	4	4	4	ACCTTCGCCTCCCAGGGGGGGCTAG	7	+	775	1245
ENSDARG00000006038	ENSDART00000103409	4	4	4	AGCGGCGGCGGTCTTTGCGTGAGTG	7	+	920	1245
ENSDARG00000006038	ENSDART00000103409	4	5	5	GGCAAAGGCCACAGCGTTGTGTTT	6	+	1030	1245
ENSDARG00000006038	ENSDART00000103409	4	5	5	CGCGACCGCATGACTTTTTTGAT	5	+	938	1245
ENSDARG00000006038	ENSDART00000103409	4	7	7	GACCCAAACATTTACAGGTGAAGCT	7	+	1228	1245
ENSDARG00000006038	ENSDART00000103409	4	7	7	ACCCAAACATTTACAGGTGAAGCT	6	+	1229	1245
ENSDARG00000006060	ENSDART00000022668	4	5	5	TGCGGCCGCTGCTGATGGTGAGGCT	7	+	551	1779
ENSDARG00000006060	ENSDART00000022668	4	5	5	TGCGGCCGCTGCTGATGGTGAGGC	6	+	551	1779
ENSDARG00000006060	ENSDART00000022668	4	5	5	CGCTGCGGCCGCTGCTGATGGTGAG	7	+	548	1779
ENSDARG00000006060	ENSDART00000022668	4	5	5	AGAAACTGCTCTCGCTGCGGCCGCT	7	+	536	1779
ENSDARG00000006060	ENSDART00000022668	4	6	6	ATCGACCTCCTGGAGCCGCTGGA	5	+	631	1779
ENSDARG00000006060	ENSDART00000022668	4	6	6	CTCCTCCTCATGTGAAGATGTTTAG	7	+	575	1779
ENSDARG00000006060	ENSDART00000022668	4	6	6	TTCTTCTCCTCCTCATGTGAAGAT	6	+	570	1779
ENSDARG00000006060	ENSDART00000022668	4	6	6	TTCTCCTCCTCATGTGAAGATGTT	6	+	573	1779
ENSDARG00000006060	ENSDART00000022668	4	8	8	TGCTGCCACTTCCAGGTGTGTGT	5	+	856	1779
ENSDARG00000006060	ENSDART00000022668	4	10	10	AGCTCCACACAGCAGTGCAGTCTCT	7	+	1076	1779
ENSDARG00000006060	ENSDART00000022668	4	10	10	CTCCACACAGCAGTGCAGTCTCT	5	+	1078	1779
ENSDARG00000006060	ENSDART00000022668	4	11	11	AGAGTCTGCTCTGTGCTGGTGGA	5	+	1225	1779
ENSDARG00000006060	ENSDART00000022668	4	13	13	GTCACCGGCTCACCTGAAGACGTC	6	+	1432	1779
ENSDARG00000006060	ENSDART00000022668	4	13	13	GAAGACGTCAAACTGATGCGCATAC	7	+	1447	1779
ENSDARG00000006060	ENSDART00000103624	4	5	5	AGAAACTGCTCTCGCTGCGGCCGCT	7	+	536	1791
ENSDARG00000006060	ENSDART00000103624	4	5	5	TGCGGCCGCTGCTGATGGTGAGGCT	7	+	551	1791
ENSDARG00000006060	ENSDART00000103624	4	5	5	TGCGGCCGCTGCTGATGGTGAGGC	6	+	551	1791
ENSDARG00000006060	ENSDART00000103624	4	5	5	CGCTGCGGCCGCTGCTGATGGTGAG	7	+	548	1791
ENSDARG00000006060	ENSDART00000103624	4	6	6	CTCCTCCTCATGTGAAGATGTTTAG	7	+	575	1791
ENSDARG00000006060	ENSDART00000103624	4	6	6	TTCTCCTCCTCATGTGAAGATGTT	6	+	573	1791
ENSDARG00000006060	ENSDART00000103624	4	6	6	ATCGACCTCCTGGAGCCGCTGGA	5	+	631	1791
ENSDARG00000006060	ENSDART00000103624	4	6	6	TTCTTCTCCTCCTCATGTGAAGAT	6	+	570	1791
ENSDARG00000006060	ENSDART00000103624	4	9	9	TGCTGCCACTTCCAGGTGTGTGT	5	+	862	1791
ENSDARG00000006060	ENSDART00000103624	4	11	11	AGCTCCACACAGCAGTGCAGTCTCT	7	+	1082	1791
ENSDARG00000006060	ENSDART00000103624	4	11	11	CTCCACACAGCAGTGCAGTCTCT	5	+	1084	1791
ENSDARG00000006060	ENSDART00000103624	4	12	12	AGAGTCTGCTCTGTGCTGGTGGA	5	+	1231	1791
ENSDARG00000006060	ENSDART00000103624	4	14	14	GTCACCGGCTCACCTGAAGACGTC	6	+	1444	1791
ENSDARG00000006060	ENSDART00000103624	4	14	14	GAAGACGTCAAACTGATGCGCATAC	7	+	1459	1791
ENSDARG00000006215	ENSDART00000018261	4	3	3	AGATGCCCATTGTTGGACTGGGAA	6	+	140	1044
ENSDARG00000006215	ENSDART00000018261	4	7	7	CACAAAGGCAATGGAGGAGTTGGT	6	+	528	1044
ENSDARG00000006215	ENSDART00000018261	4	7	7	CACAAAGGCAATGGAGGAGTTGGTG	7	+	528	1044
ENSDARG00000006215	ENSDART00000018261	4	8	8	TTCACCAAACAGACCATGGTGAGTA	7	+	747	1044
ENSDARG00000006215	ENSDART00000018261	4	8	8	CACCAAACAGACCATGGTGAGTA	5	+	749	1044
ENSDARG00000006215	ENSDART00000018261	4	10	10	ACATTCAGAGGAATGTTGTGGTC	5	+	863	1044
ENSDARG00000006215	ENSDART00000090003	4	3	3	AGATGCCCATTGTTGGACTGGGAA	6	+	125	1029
ENSDARG00000006215	ENSDART00000090003	4	7	7	CACAAAGGCAATGGAGGAGTTGGT	6	+	513	1029
ENSDARG00000006215	ENSDART00000090003	4	7	7	CACAAAGGCAATGGAGGAGTTGGTG	7	+	513	1029
ENSDARG00000006215	ENSDART00000090003	4	8	8	TTCACCAAACAGACCATGGTGAGTA	7	+	732	1029
ENSDARG00000006215	ENSDART00000090003	4	8	8	CACCAAACAGACCATGGTGAGTA	5	+	734	1029
ENSDARG00000006215	ENSDART00000090003	4	10	10	ACATTCAGAGGAATGTTGTGGTC	5	+	848	1029
ENSDARG00000006215	ENSDART00000101739	4	1	1	AAATCCACATACGAGCAGAGGCA	5	+	60	1035
ENSDARG00000006215	ENSDART00000101739	4	1	1	TCCTCCTTCCATCTACGGGGTGTTT	7	+	19	1035
ENSDARG00000006215	ENSDART00000101739	4	1	1	CAAATCCACATACGAGCAGAGGCA	6	+	59	1035
ENSDARG00000006215	ENSDART00000101739	4	2	2	AGATGCCCATTGTTGGACTGGGAA	6	+	131	1035
ENSDARG00000006215	ENSDART00000101739	4	6	6	CACAAAGGCAATGGAGGAGTTGGTG	7	+	519	1035
ENSDARG00000006215	ENSDART00000101739	4	6	6	CACAAAGGCAATGGAGGAGTTGGT	6	+	519	1035
ENSDARG00000006215	ENSDART00000101739	4	7	7	CACCAAACAGACCATGGTGAGTA	5	+	740	1035
ENSDARG00000006215	ENSDART00000101739	4	7	7	TTCACCAAACAGACCATGGTGAGTA	7	+	738	1035
ENSDARG00000006215	ENSDART00000101739	4	9	9	ACATTCAGAGGAATGTTGTGGTC	5	+	854	1035
ENSDARG00000006283	ENSDART00000028016	4	1	1	GCAGGCCTCCTGTTTGAAGGTGGA	6	-	18	1554
ENSDARG00000006283	ENSDART00000028016	4	2	2	CACTTCTTCACCCAGGAAGAGTTT	6	-	159	1554
ENSDARG00000006283	ENSDART00000028016	4	4	4	TTCTTCCTCATTGGCGAAGTTGAG	6	-	355	1554
ENSDARG00000006283	ENSDART00000028016	4	4	4	TGCTTCTTCCTCATTGGCGAAGTT	6	-	358	1554
ENSDARG00000006283	ENSDART00000028016	4	8	8	GTCGTCGCATTTCGTTTTTGACTGC	7	-	847	1554
ENSDARG00000006283	ENSDART00000028016	4	8	8	AAATGCCACACATGTCGAATAGTTT	7	-	748	1554
ENSDARG00000006283	ENSDART00000028016	4	9	9	AGCTCCACCAATAGAAGGAGGCGCT	7	-	1140	1554
ENSDARG00000006283	ENSDART00000028016	4	9	9	AGAATCAACATCTTGTGGTGGAG	5	-	1220	1554
ENSDARG00000006283	ENSDART00000028016	4	9	9	GGCCTCTGCTGGGTGGAGGAGGAG	6	-	1061	1554
ENSDARG00000006283	ENSDART00000028016	4	9	9	GGCCTCTGCTGGGTGGAGGAGGA	5	-	1062	1554
ENSDARG00000006283	ENSDART00000028016	4	9	9	AGAATCAACATCTTGTGGTGGAGGA	7	-	1218	1554
ENSDARG00000006283	ENSDART00000028016	4	9	9	CTCTGCCTCTGGAAGGAGGTGGGG	6	-	947	1554
ENSDARG00000006283	ENSDART00000028016	4	9	9	CTCTGCCTCTGGAAGGAGGTGGG	5	-	948	1554
ENSDARG00000006283	ENSDART00000028016	4	9	9	CGCCTCCTCTGGATGGTGGAGGCG	6	-	884	1554
ENSDARG00000006283	ENSDART00000028016	4	9	9	CGCCTCCTCTGGATGGTGGAGGC	5	-	885	1554
ENSDARG00000006283	ENSDART00000028016	4	9	9	CCCCTCTGCCTCTGGAAGGAGGT	5	-	951	1554
ENSDARG00000006283	ENSDART00000028016	4	9	9	AGCGCCTCCTCTGGATGGTGGAGGC	7	-	885	1554
ENSDARG00000006283	ENSDART00000028016	4	9	9	ATCAACATCTTGTGGTGGAGGAGGT	7	-	1215	1554
ENSDARG00000006283	ENSDART00000028016	4	9	9	ATCAACATCTTGTGGTGGAGGAG	5	-	1217	1554
ENSDARG00000006283	ENSDART00000028016	4	10	10	CGCTCCCACAATCCCATCTGAAGGA	7	-	1434	1554
ENSDARG00000006283	ENSDART00000028016	4	11	11	AACGTCATCATCATCGTCGTCGTC	6	-	1507	1554
ENSDARG00000006396	ENSDART00000007237	4	2	2	GAAAGCCTCATCCCAGGTGGGTGT	6	+	206	3855
ENSDARG00000006396	ENSDART00000007237	4	5	5	TTCCCCAGAACAGTCGTGTGTCGCA	7	+	551	3855
ENSDARG00000006396	ENSDART00000007237	4	5	5	GACTTCCCCAGAACAGTCGTGTGT	6	+	548	3855
ENSDARG00000006396	ENSDART00000007237	4	8	8	CAACACACCATCACCGTAGTGGTC	6	+	1039	3855
ENSDARG00000006396	ENSDART00000007237	4	8	8	AGAATCGCATGGGGAGCAGCCAAC	6	+	1019	3855
ENSDARG00000006396	ENSDART00000007237	4	9	9	CTCACCTGCGATGTTGATGGAAAC	6	+	1129	3855
ENSDARG00000006396	ENSDART00000007237	4	9	9	AACCTCACCTGCGATGTTGATGGA	6	+	1126	3855
ENSDARG00000006396	ENSDART00000007237	4	10	10	AGCCGCAAAGTGTCAGATGGCGTC	6	+	1216	3855
ENSDARG00000006396	ENSDART00000007237	4	11	11	AACAGCAGAGCTCTGTTAGACTGT	6	+	1396	3855
ENSDARG00000006396	ENSDART00000007237	4	14	14	AGCGCCACACTCACAGTAGTCGGT	6	+	1870	3855
ENSDARG00000006396	ENSDART00000007237	4	15	15	CCCACCAACTGACCTGGAGCTGAC	6	+	1902	3855
ENSDARG00000006396	ENSDART00000007237	4	16	16	CACAACAGCCCAGCTGGAGTTGTC	6	+	2070	3855
ENSDARG00000006396	ENSDART00000007237	4	18	18	GGCCCCAGACCAGAGGTGGTGCT	5	+	2443	3855
ENSDARG00000006396	ENSDART00000007237	4	18	18	GCCCCAGACCAGAGGTGGTGCTGGG	7	+	2444	3855
ENSDARG00000006396	ENSDART00000007237	4	18	18	GAAGGCCCCAGACCAGAGGTGGTG	6	+	2440	3855
ENSDARG00000006396	ENSDART00000007237	4	20	20	GCCTTCAACGGGCATGGAGACGGA	6	+	2743	3855
ENSDARG00000006396	ENSDART00000007237	4	20	20	CTCATCTTCAGTGGGGAGGAGAC	5	+	2665	3855
ENSDARG00000006396	ENSDART00000007237	4	22	22	GCCTTCACAGAAGTGGACGAAGGT	6	+	3085	3855
ENSDARG00000006396	ENSDART00000007237	4	23	23	ACATCCCGCAGTAGAGGCGGGTAA	6	+	3117	3855
ENSDARG00000006396	ENSDART00000007237	4	23	23	TTCGACATCCCGCAGTAGAGGCG	5	+	3113	3855
ENSDARG00000006396	ENSDART00000007237	4	28	28	ACAAGCCCCTAAAGGGCAGCCGGA	6	+	3647	3855
ENSDARG00000006396	ENSDART00000007237	4	28	28	GAAAAAGACACTGCGGAGGGAAAC	6	+	3793	3855
ENSDARG00000006409	ENSDART00000027304	4	4	4	AGATACTGCGGGGTCTGAAGGTTAG	7	+	419	1101
ENSDARG00000006409	ENSDART00000027304	4	8	8	GGCTGCATCATGGCGGAGATGTT	5	+	649	1101
ENSDARG00000006409	ENSDART00000027304	4	9	9	CTACAAAGCCAAGATGTGAGTGT	5	+	769	1101
ENSDARG00000006409	ENSDART00000027304	4	9	9	AGCTACAAAGCCAAGATGTGAGTGT	7	+	767	1101
ENSDARG00000006409	ENSDART00000027304	4	10	10	GCCAAAAACTACATCAGAGGTCTAC	7	+	784	1101
ENSDARG00000006522	ENSDART00000050665	4	3	3	TACAACGACACACTTGATGGTGAA	6	+	319	1311
ENSDARG00000006522	ENSDART00000050665	4	3	3	TCCACCAACCTCATGGTGTGGAT	5	+	226	1311
ENSDARG00000006522	ENSDART00000050665	4	3	3	ACCAACCTCATGGTGTGGATGAT	5	+	229	1311
ENSDARG00000006522	ENSDART00000050665	4	4	4	TCCAGCTCCGCTCTCGCCGGATGC	6	+	688	1311
ENSDARG00000006522	ENSDART00000050665	4	4	4	TGCTACTTCACTATAGTCGCTGTT	6	+	817	1311
ENSDARG00000006522	ENSDART00000050665	4	4	4	TGCTGCAGCCAGTGAATGTGAGTGT	7	+	342	1311
ENSDARG00000006522	ENSDART00000050665	4	4	4	GTCCAAGGCCACACGAATGGGCT	5	+	853	1311
ENSDARG00000006522	ENSDART00000050665	4	4	4	GCCAACGTCATGGCTGTGAAGGA	5	+	988	1311
ENSDARG00000006522	ENSDART00000050665	4	4	4	GAACCCAACGCGGAGTCTGGATGT	6	+	753	1311
ENSDARG00000006522	ENSDART00000050665	4	4	4	AAAGACGACCCTAAGAAGAAGGA	5	+	613	1311
ENSDARG00000006522	ENSDART00000050665	4	4	4	ACACACTCCCCATCCCGCTGACTCT	7	+	1052	1311
ENSDARG00000006522	ENSDART00000050665	4	4	4	ACACTCCCCATCCCGCTGACTCT	5	+	1054	1311
ENSDARG00000006522	ENSDART00000050665	4	4	4	ACCCTAAGAAGAAGGAGGAGGCT	5	+	620	1311
ENSDARG00000006522	ENSDART00000050665	4	4	4	ACCCTAAGAAGAAGGAGGAGGCTCT	7	+	620	1311
ENSDARG00000006522	ENSDART00000050665	4	4	4	AGACCCAGAGAGACGGAGCAGCT	5	+	1014	1311
ENSDARG00000006522	ENSDART00000050665	4	5	5	GTTCCAAACGTGGGCCGCCGTGGTA	7	+	1221	1311
ENSDARG00000006567	ENSDART00000008416	4	2	2	AACTCACTCTTATTGGTGGTGAA	5	-	199	921
ENSDARG00000006567	ENSDART00000008416	4	4	4	TTATCAGACATGCACCGTAGCCTTC	7	-	346	921
ENSDARG00000006567	ENSDART00000008416	4	6	6	TCCCACACACACTGCAGCGGCGTCT	7	-	740	921
ENSDARG00000006567	ENSDART00000008416	4	6	6	GAAGCCAGAAAACATGGCCGGATTG	7	-	711	921
ENSDARG00000006567	ENSDART00000008416	4	6	6	CAATCCCACACACACTGCAGCGGCG	7	-	743	921
ENSDARG00000006567	ENSDART00000008416	4	6	6	ATCCCACACACACTGCAGCGGCG	5	-	743	921
ENSDARG00000006567	ENSDART00000008416	4	6	6	ACCCTCCTCTCAGGCTGGGATGTG	6	-	843	921
ENSDARG00000006567	ENSDART00000008416	4	6	6	ACACCCTCCTCTCAGGCTGGGAT	5	-	846	921
ENSDARG00000006567	ENSDART00000008416	4	6	6	AACACCCTCCTCTCAGGCTGGGAT	6	-	846	921
ENSDARG00000006710	ENSDART00000016075	4	1	1	AGCTACACAGTGCCCTGCGAGGAC	6	+	37	978
ENSDARG00000006710	ENSDART00000016075	4	2	2	AGACGCAGAGGTGGAGGGTGTAGAG	7	+	171	978
ENSDARG00000006710	ENSDART00000016075	4	2	2	GAAGACGCAGAGGTGGAGGGTGTA	6	+	169	978
ENSDARG00000006710	ENSDART00000016075	4	2	2	GAAGACGCAGAGGTGGAGGGTGT	5	+	169	978
ENSDARG00000006710	ENSDART00000016075	4	3	3	TCCAAAACAGTTGTGATGTGAAGGT	7	+	341	978
ENSDARG00000006710	ENSDART00000016075	4	4	4	ACATCAATCATTTAGTGTTTGAA	5	+	386	978
ENSDARG00000006710	ENSDART00000016075	4	4	4	AGCTACATCAATCATTTAGTGTTT	6	+	382	978
ENSDARG00000006710	ENSDART00000016075	4	5	5	GAAGACAACTGTAAGGTTAGTAA	5	+	535	978
ENSDARG00000006710	ENSDART00000016075	4	6	6	CACAAACACTATAAAGGTTGGAGCT	7	+	663	978
ENSDARG00000006710	ENSDART00000016075	4	9	9	CCCTGCCTCTTTGTGTTATTGGTG	6	+	929	978
ENSDARG00000006747	ENSDART00000011455	4	1	1	TCCCTCTGCGCGCTTGGGATGCT	5	+	52	882
ENSDARG00000006747	ENSDART00000011455	4	1	1	TCCACCAACATGGGGCTCTGGAGCA	7	+	316	882
ENSDARG00000006747	ENSDART00000011455	4	1	1	TACAACTCCACCAACATGGGGCTCT	7	+	310	882
ENSDARG00000006747	ENSDART00000011455	4	1	1	AACAACAGCCTCCCTCTGCGGGC	5	+	187	882
ENSDARG00000006747	ENSDART00000011455	4	1	1	CAACTCCACCAACATGGGGCTCT	5	+	312	882
ENSDARG00000006747	ENSDART00000011455	4	1	1	AACAGCCTCCCTCTGCGGGCGAG	5	+	190	882
ENSDARG00000006747	ENSDART00000011455	4	3	3	GCCTCATGCAGTATGTGGCAGGA	5	+	602	882
ENSDARG00000006747	ENSDART00000011455	4	3	3	GACCGCGGCCTCATGCAGTATGT	5	+	595	882
ENSDARG00000006747	ENSDART00000011455	4	4	4	GGCTTCTTCTGCACGCTGGCGCC	5	+	805	882
ENSDARG00000006766	ENSDART00000040405	4	1	1	CTCTGCAGCTGCGGGGCTGACGCT	6	-	48	2739
ENSDARG00000006766	ENSDART00000040405	4	1	1	CTATTCCCCTCTGCAGCTGCGGGG	6	-	56	2739
ENSDARG00000006766	ENSDART00000040405	4	1	1	CCCCTCTGCAGCTGCGGGGCTGAC	6	-	51	2739
ENSDARG00000006766	ENSDART00000040405	4	3	3	TTATTCTCCACAGTGAAGCAGAC	5	-	292	2739
ENSDARG00000006766	ENSDART00000040405	4	3	3	TTCTCCACAGTGAAGCAGACTTC	5	-	289	2739
ENSDARG00000006766	ENSDART00000040405	4	3	3	AAACCATGCCATATTCTCTGCCTTG	7	-	322	2739
ENSDARG00000006766	ENSDART00000040405	4	7	7	GTTCCCAGAATGACCTGGTTTGGAC	7	-	815	2739
ENSDARG00000006766	ENSDART00000040405	4	7	7	GTTCCCAGAATGACCTGGTTTGGA	6	-	816	2739
ENSDARG00000006766	ENSDART00000040405	4	8	8	AAAGCCCTCCTTCAGCAGCAGCT	5	-	869	2739
ENSDARG00000006766	ENSDART00000040405	4	14	14	GTCCGCCACTCTATGAATGGGCA	5	-	1514	2739
ENSDARG00000006766	ENSDART00000040405	4	17	17	GACACCAGAGTCTTGTAGTAGGA	5	-	1930	2739
ENSDARG00000006766	ENSDART00000040405	4	17	17	CTCTGCAGACACCAGAGTCTTGTAG	7	-	1935	2739
ENSDARG00000006766	ENSDART00000040405	4	19	19	GTCAGCAAACTTTGCGATGCAGAA	6	-	2221	2739
ENSDARG00000006766	ENSDART00000040405	4	19	19	TCCGTCAGCAAACTTTGCGATGCA	6	-	2224	2739
ENSDARG00000006766	ENSDART00000040405	4	19	19	TCCTTCCACTGGAGGCTGGGCTGCA	7	-	2172	2739
ENSDARG00000006766	ENSDART00000040405	4	21	21	GTAGGCAAACGCGTACTCTGTAGCC	7	-	2394	2739
ENSDARG00000006766	ENSDART00000040405	4	21	21	GGCAAACGCGTACTCTGTAGCCTGT	7	-	2391	2739
ENSDARG00000006766	ENSDART00000040405	4	22	22	ACATTCAGCAGACACTGTGTGTTG	6	-	2484	2739
ENSDARG00000006766	ENSDART00000040405	4	22	22	TTCAGCAGACACTGTGTGTTGTG	5	-	2482	2739
ENSDARG00000006766	ENSDART00000040405	4	22	22	AGACCCACATCTTCTTTAGTGTCT	6	-	2553	2739
ENSDARG00000006766	ENSDART00000040405	4	22	22	CACATCTTCTTTAGTGTCTGCGAAC	7	-	2547	2739
ENSDARG00000006766	ENSDART00000090972	4	1	1	CTATTCCCCTCTGCAGCTGCGGGG	6	-	56	2733
ENSDARG00000006766	ENSDART00000090972	4	1	1	CCCCTCTGCAGCTGCGGGGCTGAC	6	-	51	2733
ENSDARG00000006766	ENSDART00000090972	4	1	1	CTCTGCAGCTGCGGGGCTGACGCT	6	-	48	2733
ENSDARG00000006766	ENSDART00000090972	4	3	3	TTATTCTCCACAGTGAAGCAGAC	5	-	292	2733
ENSDARG00000006766	ENSDART00000090972	4	3	3	TTCTCCACAGTGAAGCAGACTTC	5	-	289	2733
ENSDARG00000006766	ENSDART00000090972	4	3	3	AAACCATGCCATATTCTCTGCCTTG	7	-	322	2733
ENSDARG00000006766	ENSDART00000090972	4	7	7	GTTCCCAGAATGACCTGGTTTGGA	6	-	816	2733
ENSDARG00000006766	ENSDART00000090972	4	7	7	GTTCCCAGAATGACCTGGTTTGGAC	7	-	815	2733
ENSDARG00000006766	ENSDART00000090972	4	8	8	AAAGCCCTCCTTCAGCAGCAGCT	5	-	869	2733
ENSDARG00000006766	ENSDART00000090972	4	14	14	GTCCGCCACTCTATGAATGGGCA	5	-	1514	2733
ENSDARG00000006766	ENSDART00000090972	4	17	17	GACACCAGAGTCTTGTAGTAGGA	5	-	1930	2733
ENSDARG00000006766	ENSDART00000090972	4	17	17	CTCTGCAGACACCAGAGTCTTGTAG	7	-	1935	2733
ENSDARG00000006766	ENSDART00000090972	4	21	21	TCCGTCAGCAAACTTTGCGATGCA	6	-	2218	2733
ENSDARG00000006766	ENSDART00000090972	4	21	21	TCCTTCCACTGGAGGCTGGGCTGCA	7	-	2166	2733
ENSDARG00000006766	ENSDART00000090972	4	21	21	GTCAGCAAACTTTGCGATGCAGAA	6	-	2215	2733
ENSDARG00000006766	ENSDART00000090972	4	23	23	GTAGGCAAACGCGTACTCTGTAGCC	7	-	2388	2733
ENSDARG00000006766	ENSDART00000090972	4	23	23	GGCAAACGCGTACTCTGTAGCCTGT	7	-	2385	2733
ENSDARG00000006766	ENSDART00000090972	4	24	24	ACATTCAGCAGACACTGTGTGTTG	6	-	2478	2733
ENSDARG00000006766	ENSDART00000090972	4	24	24	TTCAGCAGACACTGTGTGTTGTG	5	-	2476	2733
ENSDARG00000006766	ENSDART00000090972	4	24	24	AGACCCACATCTTCTTTAGTGTCT	6	-	2547	2733
ENSDARG00000006766	ENSDART00000090972	4	24	24	CACATCTTCTTTAGTGTCTGCGAAC	7	-	2541	2733
ENSDARG00000006766	ENSDART00000100974	4	1	1	CTCTGCAGCTGCGGGGCTGACGCT	6	-	48	861
ENSDARG00000006766	ENSDART00000100974	4	1	1	CTATTCCCCTCTGCAGCTGCGGGG	6	-	56	861
ENSDARG00000006766	ENSDART00000100974	4	1	1	CCCCTCTGCAGCTGCGGGGCTGAC	6	-	51	861
ENSDARG00000006766	ENSDART00000100974	4	3	3	TTATTCTCCACAGTGAAGCAGAC	5	-	292	861
ENSDARG00000006766	ENSDART00000100974	4	3	3	TTCTCCACAGTGAAGCAGACTTC	5	-	289	861
ENSDARG00000006766	ENSDART00000100974	4	3	3	AAACCATGCCATATTCTCTGCCTTG	7	-	322	861
ENSDARG00000006766	ENSDART00000100974	4	6	6	GGCAAACGCGTACTCTGTAGCCTGT	7	-	513	861
ENSDARG00000006766	ENSDART00000100974	4	6	6	GTAGGCAAACGCGTACTCTGTAGCC	7	-	516	861
ENSDARG00000006766	ENSDART00000100974	4	7	7	TTCAGCAGACACTGTGTGTTGTG	5	-	604	861
ENSDARG00000006766	ENSDART00000100974	4	7	7	CACATCTTCTTTAGTGTCTGCGAAC	7	-	669	861
ENSDARG00000006766	ENSDART00000100974	4	7	7	ACATTCAGCAGACACTGTGTGTTG	6	-	606	861
ENSDARG00000006766	ENSDART00000100974	4	7	7	AGACCCACATCTTCTTTAGTGTCT	6	-	675	861
ENSDARG00000007018	ENSDART00000075605	4	2	1	AACAGCACCGGTTGTGACTGGGAC	6	+	54	723
ENSDARG00000007018	ENSDART00000075605	4	2	1	ACATACAGCATGCAGCAGGAGTT	5	+	98	723
ENSDARG00000007018	ENSDART00000075605	4	2	1	ACCAAAAGCCCTCGGGGTGAGAA	5	+	159	723
ENSDARG00000007018	ENSDART00000075605	4	6	5	TCCATCTGCCTATCTGTGTTTGCC	6	+	532	723
ENSDARG00000007018	ENSDART00000075605	4	6	5	TCCATCTGCCTATCTGTGTTTGC	5	+	532	723
ENSDARG00000007018	ENSDART00000075605	4	6	5	ATCTCCATCTGCCTATCTGTGTTT	6	+	529	723
ENSDARG00000007018	ENSDART00000075605	4	7	6	TCCTGCAGATTCCTGTGGTCAAC	5	+	578	723
ENSDARG00000007018	ENSDART00000075605	4	7	6	TTCAACATCCTCCTGCAGAAGCT	5	+	680	723
ENSDARG00000007018	ENSDART00000075605	4	7	6	TTCAACGCCCTCCTGCAGAAAAC	5	+	611	723
ENSDARG00000007175	ENSDART00000021610	4	3	2	ACAAACTACTGAAGGTCTTGGAG	5	+	128	1926
ENSDARG00000007175	ENSDART00000021610	4	3	2	ACCTTCAACACTATGAAGACTCT	5	+	218	1926
ENSDARG00000007175	ENSDART00000021610	4	5	4	GTTATCGCCCCACTGGTGTCTCT	5	+	433	1926
ENSDARG00000007175	ENSDART00000021610	4	9	8	AGCTACAGAGCTGCAGAAGCGGGA	6	+	1011	1926
ENSDARG00000007175	ENSDART00000021610	4	9	8	GCCTTCGCACAAGTCTCTGGTGCA	6	+	1068	1926
ENSDARG00000007175	ENSDART00000021610	4	11	10	CCCTGCAGATTGTATTGTGTTTTTT	7	+	1251	1926
ENSDARG00000007175	ENSDART00000021610	4	11	10	CCCTGCAGATTGTATTGTGTTTTT	6	+	1251	1926
ENSDARG00000007175	ENSDART00000021610	4	13	12	GTTATCATCCACCTTTTGTTGCA	5	+	1651	1926
ENSDARG00000007175	ENSDART00000021610	4	14	13	CACTTCTACCTGAAGCTGGGTCGTA	7	+	1726	1926
ENSDARG00000007175	ENSDART00000021610	4	14	13	CACTCCATCACTATGAAGATGAG	5	+	1777	1926
ENSDARG00000007175	ENSDART00000021610	4	14	13	ACACACTTCTACCTGAAGCTGGG	5	+	1723	1926
ENSDARG00000007175	ENSDART00000101198	4	2	2	ACCTTCAACACTATGAAGACTCT	5	+	218	1917
ENSDARG00000007175	ENSDART00000101198	4	2	2	ACAAACTACTGAAGGTCTTGGAG	5	+	128	1917
ENSDARG00000007175	ENSDART00000101198	4	4	4	GTTATCGCCCCACTGGTGTCTCT	5	+	433	1917
ENSDARG00000007175	ENSDART00000101198	4	8	8	AGCTACAGAGCTGCAGAAGCGGGA	6	+	1011	1917
ENSDARG00000007175	ENSDART00000101198	4	8	8	GCCTTCGCACAAGTCTCTGGTGCA	6	+	1068	1917
ENSDARG00000007175	ENSDART00000101198	4	10	10	CCCTGCAGATTGTATTGTGTTTTT	6	+	1251	1917
ENSDARG00000007175	ENSDART00000101198	4	10	10	CCCTGCAGATTGTATTGTGTTTTTT	7	+	1251	1917
ENSDARG00000007175	ENSDART00000101198	4	13	13	GTTATCATCCACCTTTTGTTGCA	5	+	1651	1917
ENSDARG00000007175	ENSDART00000101198	4	14	14	CACTTCTACCTGAAGCTGGGTCGTA	7	+	1717	1917
ENSDARG00000007175	ENSDART00000101198	4	14	14	CACTCCATCACTATGAAGATGAG	5	+	1768	1917
ENSDARG00000007175	ENSDART00000101198	4	14	14	ACACACTTCTACCTGAAGCTGGG	5	+	1714	1917
ENSDARG00000007192	ENSDART00000023296	4	2	2	AACAGCCTCGCTTCTGTGTTGAG	5	-	573	5751
ENSDARG00000007192	ENSDART00000023296	4	2	2	AACAGCCTCGCTTCTGTGTTGAGGA	7	-	571	5751
ENSDARG00000007192	ENSDART00000023296	4	3	3	CAATCCCACAATTCAGCTGTTTAC	6	-	755	5751
ENSDARG00000007192	ENSDART00000023296	4	3	3	GCAATCCCACAATTCAGCTGTTTAC	7	-	755	5751
ENSDARG00000007192	ENSDART00000023296	4	4	4	GGCCACTCCACACTGCAGCTGTC	5	-	1073	5751
ENSDARG00000007192	ENSDART00000023296	4	4	4	GTCTGCACACCACATGGGCATCT	5	-	1053	5751
ENSDARG00000007192	ENSDART00000023296	4	4	4	CACTCCACACTGCAGCTGTCTGC	5	-	1070	5751
ENSDARG00000007192	ENSDART00000023296	4	4	4	GTTTTCCCCAGCCTGGAGAAGAG	5	-	1197	5751
ENSDARG00000007192	ENSDART00000023296	4	4	4	TCCTACATCCTCCTTGTGTTTAC	5	-	1226	5751
ENSDARG00000007192	ENSDART00000023296	4	6	6	GTCCCCTCCACGCAGTCTGAGAG	5	-	1568	5751
ENSDARG00000007192	ENSDART00000023296	4	6	6	TTCACCAGCACCAAAGGCTGAATTC	7	-	1725	5751
ENSDARG00000007192	ENSDART00000023296	4	7	7	AGCAACATCCCAATGTTGTTTAC	5	-	1877	5751
ENSDARG00000007192	ENSDART00000023296	4	9	9	CAACCAGCCTCACGTTTGCTGTA	5	-	2316	5751
ENSDARG00000007192	ENSDART00000023296	4	9	9	ACCAGCCTCACGTTTGCTGTAGAC	6	-	2313	5751
ENSDARG00000007192	ENSDART00000023296	4	9	9	CTCTGCACACCACTGCAGTGTTT	5	-	2424	5751
ENSDARG00000007192	ENSDART00000023296	4	10	10	ATCCACGTCTGATTATGAAGAATCT	7	-	2672	5751
ENSDARG00000007192	ENSDART00000023296	4	13	13	GCAATCCCACAATTCAGCTGTTTAC	7	-	3641	5751
ENSDARG00000007192	ENSDART00000023296	4	13	13	CAATCCCACAATTCAGCTGTTTAC	6	-	3641	5751
ENSDARG00000007192	ENSDART00000023296	4	14	14	CTCTCCAGACAACCGCAGCAGAC	5	-	3854	5751
ENSDARG00000007192	ENSDART00000023296	4	14	14	AGAGCCACAGCCCAGCTGTCTGC	5	-	3971	5751
ENSDARG00000007192	ENSDART00000023296	4	14	14	AGAGCCAGAGACGAGTCTGAAGAC	6	-	3822	5751
ENSDARG00000007192	ENSDART00000023296	4	14	14	AGCCACAGCCCAGCTGTCTGCAGAC	7	-	3967	5751
ENSDARG00000007192	ENSDART00000023296	4	15	15	TCCTACATCCTCCTTGTGTCGAC	5	-	4436	5751
ENSDARG00000007192	ENSDART00000023296	4	15	15	GTTTTCCCCAGCCTGGAGAAGAG	5	-	4407	5751
ENSDARG00000007192	ENSDART00000023296	4	15	15	GTCTGCACACCACATGGGCATCT	5	-	4263	5751
ENSDARG00000007192	ENSDART00000023296	4	15	15	CACTCCACACTGCAGCTGTCTGC	5	-	4280	5751
ENSDARG00000007192	ENSDART00000023296	4	15	15	GGCCACTCCACACTGCAGCTGTC	5	-	4283	5751
ENSDARG00000007192	ENSDART00000023296	4	17	17	TTCACCAGCACCAAAGGCTGAATTC	7	-	4929	5751
ENSDARG00000007192	ENSDART00000023296	4	17	17	ATCCCCTCCACGCAGTCTGAGAG	5	-	4772	5751
ENSDARG00000007192	ENSDART00000023296	4	17	17	TGCTCCACAACCCAGCTGCCTGC	5	-	4889	5751
ENSDARG00000007192	ENSDART00000023296	4	18	18	GTTCACCCCATCCTTTTGACGTA	5	-	5328	5751
ENSDARG00000007192	ENSDART00000043118	4	1	1	AACAGCCTCGCTTCTGTGTTGAG	5	-	231	10608
ENSDARG00000007192	ENSDART00000043118	4	1	1	AACAGCCTCGCTTCTGTGTTGAGGA	7	-	229	10608
ENSDARG00000007192	ENSDART00000043118	4	2	2	GCAATCCCACAATTCAGCTGTTTAC	7	-	413	10608
ENSDARG00000007192	ENSDART00000043118	4	2	2	CAATCCCACAATTCAGCTGTTTAC	6	-	413	10608
ENSDARG00000007192	ENSDART00000043118	4	3	3	CACTCCACACTGCAGCTGTCTGC	5	-	728	10608
ENSDARG00000007192	ENSDART00000043118	4	3	3	TCCTACATCCTCCTTGTGTTTAC	5	-	884	10608
ENSDARG00000007192	ENSDART00000043118	4	3	3	GGCCACTCCACACTGCAGCTGTC	5	-	731	10608
ENSDARG00000007192	ENSDART00000043118	4	3	3	GTCTGCACACCACATGGGCATCT	5	-	711	10608
ENSDARG00000007192	ENSDART00000043118	4	3	3	GTTTTCCCCAGCCTGGAGAAGAG	5	-	855	10608
ENSDARG00000007192	ENSDART00000043118	4	5	5	GTCCCCTCCACGCAGTCTGAGAG	5	-	1226	10608
ENSDARG00000007192	ENSDART00000043118	4	5	5	TTCACCAGCACCAAAGGCTGAATTC	7	-	1383	10608
ENSDARG00000007192	ENSDART00000043118	4	6	6	AGCAACATCCCAATGTTGTTTAC	5	-	1535	10608
ENSDARG00000007192	ENSDART00000043118	4	8	8	CTCTGCACACCACTGCAGTGTTT	5	-	2082	10608
ENSDARG00000007192	ENSDART00000043118	4	8	8	ACCAGCCTCACGTTTGCTGTAGAC	6	-	1971	10608
ENSDARG00000007192	ENSDART00000043118	4	8	8	CAACCAGCCTCACGTTTGCTGTA	5	-	1974	10608
ENSDARG00000007192	ENSDART00000043118	4	9	9	ATCCACGTCTGATTATGAAGAATCT	7	-	2330	10608
ENSDARG00000007192	ENSDART00000043118	4	12	12	GCAATCCCACAATTCAGCTGTTTAC	7	-	3299	10608
ENSDARG00000007192	ENSDART00000043118	4	12	12	CAATCCCACAATTCAGCTGTTTAC	6	-	3299	10608
ENSDARG00000007192	ENSDART00000043118	4	13	13	CTCTCCAGACAACCGCAGCAGAC	5	-	3512	10608
ENSDARG00000007192	ENSDART00000043118	4	13	13	AGAGCCAGAGACGAGTCTGAAGAC	6	-	3480	10608
ENSDARG00000007192	ENSDART00000043118	4	13	13	AGCCACAGCCCAGCTGTCTGCAGAC	7	-	3625	10608
ENSDARG00000007192	ENSDART00000043118	4	13	13	AGAGCCACAGCCCAGCTGTCTGC	5	-	3629	10608
ENSDARG00000007192	ENSDART00000043118	4	14	14	CACTCCACACTGCAGCTGTCTGC	5	-	3938	10608
ENSDARG00000007192	ENSDART00000043118	4	14	14	GTTTTCCCCAGCCTGGAGAAGAG	5	-	4065	10608
ENSDARG00000007192	ENSDART00000043118	4	14	14	GTCTGCACACCACATGGGCATCT	5	-	3921	10608
ENSDARG00000007192	ENSDART00000043118	4	14	14	GGCCACTCCACACTGCAGCTGTC	5	-	3941	10608
ENSDARG00000007192	ENSDART00000043118	4	14	14	TCCTACATCCTCCTTGTGTCGAC	5	-	4094	10608
ENSDARG00000007192	ENSDART00000043118	4	16	16	TGCTCCACAACCCAGCTGCCTGC	5	-	4547	10608
ENSDARG00000007192	ENSDART00000043118	4	16	16	ATCCCCTCCACGCAGTCTGAGAG	5	-	4430	10608
ENSDARG00000007192	ENSDART00000043118	4	16	16	TTCACCAGCACCAAAGGCTGAATTC	7	-	4587	10608
ENSDARG00000007192	ENSDART00000043118	4	17	17	GTTCACCCCATCCTTTTGACGTA	5	-	4986	10608
ENSDARG00000007192	ENSDART00000043118	4	19	19	CAATCCCACAATTCAGCTGTTTAC	6	-	5480	10608
ENSDARG00000007192	ENSDART00000043118	4	19	19	GCAATCCCACAATTCAGCTGTTTAC	7	-	5480	10608
ENSDARG00000007192	ENSDART00000043118	4	20	20	GTCTGCACACCACATGGGCATCT	5	-	5778	10608
ENSDARG00000007192	ENSDART00000043118	4	20	20	GTTTCCCCCAGCCTGGAGAAGAG	5	-	5922	10608
ENSDARG00000007192	ENSDART00000043118	4	20	20	GGCCACTCCACACTGCAGCTGTC	5	-	5798	10608
ENSDARG00000007192	ENSDART00000043118	4	20	20	CACTCCACACTGCAGCTGTCTGC	5	-	5795	10608
ENSDARG00000007192	ENSDART00000043118	4	20	20	TCCTACATCCTCCTTGTGTAGAC	5	-	5951	10608
ENSDARG00000007192	ENSDART00000043118	4	21	21	CTCATCTTCATCACAGTAGTTTTG	6	-	6244	10608
ENSDARG00000007192	ENSDART00000043118	4	22	22	TTCACCAGCACCAAAGGCTGAATTC	7	-	6456	10608
ENSDARG00000007192	ENSDART00000043118	4	22	22	TGCTCCACAACCCAGCTGCCTGC	5	-	6416	10608
ENSDARG00000007192	ENSDART00000043118	4	22	22	ATCCCCTCCACGCAGTCTGAGAG	5	-	6299	10608
ENSDARG00000007192	ENSDART00000043118	4	32	32	ATCCACATCTGATTATGAAGGATTT	7	-	9407	10608
ENSDARG00000007192	ENSDART00000043118	4	32	32	AGAACCTCCAACCAGATGGGTTT	5	-	9365	10608
ENSDARG00000007192	ENSDART00000043118	4	32	32	AGAACCTCCAACCAGATGGGTTTCT	7	-	9363	10608
ENSDARG00000007192	ENSDART00000043118	4	35	35	GCAATCCCACAATTCAGCTGTTTAC	7	-	10430	10608
ENSDARG00000007192	ENSDART00000043118	4	35	35	CAATCCCACAATTCAGCTGTTTAC	6	-	10430	10608
ENSDARG00000007192	ENSDART00000047962	4	2	2	GTTCACCCCATCCTTTTGACGTA	5	-	333	10038
ENSDARG00000007192	ENSDART00000047962	4	4	4	GCAATCCCACAATTCAGCTGTTTAC	7	-	827	10038
ENSDARG00000007192	ENSDART00000047962	4	4	4	CAATCCCACAATTCAGCTGTTTAC	6	-	827	10038
ENSDARG00000007192	ENSDART00000047962	4	5	5	GGCCACTCCACACTGCAGCTGTC	5	-	1145	10038
ENSDARG00000007192	ENSDART00000047962	4	5	5	GTCTGCACACCACATGGGCATCT	5	-	1125	10038
ENSDARG00000007192	ENSDART00000047962	4	5	5	CACTCCACACTGCAGCTGTCTGC	5	-	1142	10038
ENSDARG00000007192	ENSDART00000047962	4	5	5	GTTTCCCCCAGCCTGGAGAAGAG	5	-	1269	10038
ENSDARG00000007192	ENSDART00000047962	4	5	5	TCCTACATCCTCCTTGTGTAGAC	5	-	1298	10038
ENSDARG00000007192	ENSDART00000047962	4	6	6	CTCATCTTCATCACAGTAGTTTTG	6	-	1591	10038
ENSDARG00000007192	ENSDART00000047962	4	7	7	ATCCCCTCCACGCAGTCTGAGAG	5	-	1646	10038
ENSDARG00000007192	ENSDART00000047962	4	7	7	TGCTCCACAACCCAGCTGCCTGC	5	-	1763	10038
ENSDARG00000007192	ENSDART00000047962	4	7	7	TTCACCAGCACCAAAGGCTGAATTC	7	-	1803	10038
ENSDARG00000007192	ENSDART00000047962	4	17	17	AGAACCTCCAACCAGATGGGTTTCT	7	-	4710	10038
ENSDARG00000007192	ENSDART00000047962	4	17	17	ATCCACATCTGATTATGAAGGATTT	7	-	4754	10038
ENSDARG00000007192	ENSDART00000047962	4	17	17	AGAACCTCCAACCAGATGGGTTT	5	-	4712	10038
ENSDARG00000007192	ENSDART00000047962	4	20	20	CAATCCCACAATTCAGCTGTTTAC	6	-	5777	10038
ENSDARG00000007192	ENSDART00000047962	4	20	20	GCAATCCCACAATTCAGCTGTTTAC	7	-	5777	10038
ENSDARG00000007192	ENSDART00000047962	4	21	21	AGAGCCAGAGACGAGTCTGAAGAT	6	-	5958	10038
ENSDARG00000007192	ENSDART00000047962	4	21	21	AGAGCCACAGCCCAGCTGTCTGC	5	-	6107	10038
ENSDARG00000007192	ENSDART00000047962	4	21	21	AGCCACAGCCCAGCTGTCTGCAGAC	7	-	6103	10038
ENSDARG00000007192	ENSDART00000047962	4	22	22	GTCTGCACACCACATGGGCATCT	5	-	6399	10038
ENSDARG00000007192	ENSDART00000047962	4	22	22	TCCTACATCCTCTTTGTGTAGAC	5	-	6572	10038
ENSDARG00000007192	ENSDART00000047962	4	22	22	GGCCACTCCACACTGCAGCTGTC	5	-	6419	10038
ENSDARG00000007192	ENSDART00000047962	4	22	22	CACTCCACACTGCAGCTGTCTGC	5	-	6416	10038
ENSDARG00000007192	ENSDART00000047962	4	22	22	GACTCCTACATCCTCTTTGTGTAG	6	-	6574	10038
ENSDARG00000007192	ENSDART00000047962	4	23	23	TTATCAAGCCAGTTAGGAGCAGAT	6	-	6783	10038
ENSDARG00000007192	ENSDART00000047962	4	23	23	TTCATCTTCATTACAGTAGTTTTG	6	-	6865	10038
ENSDARG00000007192	ENSDART00000047962	4	24	24	GCCGTCCCCTCCACGCAGTCTAA	5	-	6923	10038
ENSDARG00000007192	ENSDART00000047962	4	24	24	TGCTCCACAACCCAGCTGCCTGC	5	-	7037	10038
ENSDARG00000007192	ENSDART00000047962	4	24	24	CCCCTCCACGCAGTCTAAGAGGAA	6	-	6917	10038
ENSDARG00000007192	ENSDART00000047962	4	24	24	TTCACCAGCACCAAAGGCTGAATTC	7	-	7077	10038
ENSDARG00000007192	ENSDART00000047962	4	29	29	CAATCCCACAATTCAGCTGTTTAC	6	-	8606	10038
ENSDARG00000007192	ENSDART00000047962	4	29	29	GCAATCCCACAATTCAGCTGTTTAC	7	-	8606	10038
ENSDARG00000007192	ENSDART00000047962	4	30	30	AGAGCCACAGCCCAGCTGTCTGC	5	-	8936	10038
ENSDARG00000007192	ENSDART00000047962	4	30	30	AGCCACAGCCCAGCTGTCTGCAGAC	7	-	8932	10038
ENSDARG00000007192	ENSDART00000047962	4	30	30	AGAGCCAGAGACGAGTCTGAAGAA	6	-	8787	10038
ENSDARG00000007192	ENSDART00000047962	4	31	31	CACTCCACACTGCAGCTGTCTGC	5	-	9245	10038
ENSDARG00000007192	ENSDART00000047962	4	31	31	GGCCACTCCACACTGCAGCTGTC	5	-	9248	10038
ENSDARG00000007192	ENSDART00000047962	4	31	31	GTCTGCACACCACATGGGCATCT	5	-	9228	10038
ENSDARG00000007192	ENSDART00000047962	4	31	31	TCCTACATCCTCCTTGTGTTGAC	5	-	9401	10038
ENSDARG00000007192	ENSDART00000047962	4	31	31	GTTTTCCCCAGCCTGGAGAAGAG	5	-	9372	10038
ENSDARG00000007192	ENSDART00000047962	4	32	32	CACTTCATCACCACAGTCTTTTAG	6	-	9691	10038
ENSDARG00000007192	ENSDART00000047962	4	33	33	TTCACCAGCACCAAAGGCTGAATTT	7	-	9900	10038
ENSDARG00000007192	ENSDART00000047962	4	33	33	TGCTCCACATCCCAGCTGCCTGC	5	-	9860	10038
ENSDARG00000007192	ENSDART00000047962	4	33	33	GCCCCCTCCACGCAGTCTGAGAG	5	-	9743	10038
ENSDARG00000007192	ENSDART00000047962	4	33	33	CGCCCCCTCCACGCAGTCTGAGAG	6	-	9743	10038
ENSDARG00000007192	ENSDART00000048505	4	2	2	GTTCACCCCATCCTTTTGACGTA	5	-	327	7446
ENSDARG00000007192	ENSDART00000048505	4	5	5	GCAATCCCACAATTCAGCTGTTTAC	7	-	827	7446
ENSDARG00000007192	ENSDART00000048505	4	5	5	CAATCCCACAATTCAGCTGTTTAC	6	-	827	7446
ENSDARG00000007192	ENSDART00000048505	4	6	6	AGCCACAGCCCAGCTGTCTGCAGAC	7	-	1153	7446
ENSDARG00000007192	ENSDART00000048505	4	6	6	AGAGCCACAGCCCAGCTGTCTGC	5	-	1157	7446
ENSDARG00000007192	ENSDART00000048505	4	7	7	GTCTGCACACCACATGGGCATCT	5	-	1449	7446
ENSDARG00000007192	ENSDART00000048505	4	7	7	GGCCACTCCACACTGCAGCTGTC	5	-	1469	7446
ENSDARG00000007192	ENSDART00000048505	4	7	7	GTTTCCCCCAGCCTGGAGAAGAG	5	-	1593	7446
ENSDARG00000007192	ENSDART00000048505	4	7	7	TCCTACATCCTCCTTGTGTAGAC	5	-	1622	7446
ENSDARG00000007192	ENSDART00000048505	4	7	7	CACTCCACACTGCAGCTGTCTGC	5	-	1466	7446
ENSDARG00000007192	ENSDART00000048505	4	8	8	CTCATCTTCATCACAGTAGTTTTG	6	-	1915	7446
ENSDARG00000007192	ENSDART00000048505	4	9	9	TGCTCCACAACCCAGCTGCCTGC	5	-	2087	7446
ENSDARG00000007192	ENSDART00000048505	4	9	9	ATCCCCTCCACGCAGTCTGAGAG	5	-	1970	7446
ENSDARG00000007192	ENSDART00000048505	4	9	9	TTCACCAGCACCAAAGGCTGAATTC	7	-	2127	7446
ENSDARG00000007192	ENSDART00000048505	4	18	18	CAATCCCACAATTCAGCTGTTTAC	6	-	4847	7446
ENSDARG00000007192	ENSDART00000048505	4	18	18	GCAATCCCACAATTCAGCTGTTTAC	7	-	4847	7446
ENSDARG00000007192	ENSDART00000048505	4	19	19	AGCCACAGCCCAGCTGTCTGCAGAC	7	-	5173	7446
ENSDARG00000007192	ENSDART00000048505	4	19	19	AGAGCCACAGCCCAGCTGTCTGC	5	-	5177	7446
ENSDARG00000007192	ENSDART00000048505	4	19	19	AGAGCCAGAGACGAGTCTGAAGAT	6	-	5028	7446
ENSDARG00000007192	ENSDART00000048505	4	20	20	TCCTACATCCTCTTTGTGTAGAC	5	-	5642	7446
ENSDARG00000007192	ENSDART00000048505	4	20	20	GGCCACTCCACACTGCAGCTGTC	5	-	5489	7446
ENSDARG00000007192	ENSDART00000048505	4	20	20	GTCTGCACACCACATGGGCATCT	5	-	5469	7446
ENSDARG00000007192	ENSDART00000048505	4	20	20	CACTCCACACTGCAGCTGTCTGC	5	-	5486	7446
ENSDARG00000007192	ENSDART00000048505	4	20	20	GACTCCTACATCCTCTTTGTGTAG	6	-	5644	7446
ENSDARG00000007192	ENSDART00000048505	4	21	21	TTATCAAGCCAGTTAGGAGCAGAT	6	-	5853	7446
ENSDARG00000007192	ENSDART00000048505	4	21	21	TTCATCTTCATTACAGTAGTTTTG	6	-	5935	7446
ENSDARG00000007192	ENSDART00000048505	4	22	22	GCCGTCCCCTCCACGCAGTCTAA	5	-	5993	7446
ENSDARG00000007192	ENSDART00000048505	4	22	22	TTCACCAGCACCAAAGGCTGAATTC	7	-	6147	7446
ENSDARG00000007192	ENSDART00000048505	4	22	22	CCCCTCCACGCAGTCTAAGAGGAA	6	-	5987	7446
ENSDARG00000007192	ENSDART00000048505	4	22	22	TGCTCCACAACCCAGCTGCCTGC	5	-	6107	7446
ENSDARG00000007192	ENSDART00000048505	4	23	23	TGCAGCAGAAGATGATGCTGATGTG	7	-	6330	7446
ENSDARG00000007192	ENSDART00000048505	4	23	23	AACTGCAGCAGAAGATGATGCTGAT	7	-	6333	7446
ENSDARG00000007192	ENSDART00000048505	4	23	23	ACAATCACCAGCACTGGGGGGAC	5	-	6418	7446
ENSDARG00000007192	ENSDART00000048505	4	23	23	AGAAACTGCAGCAGAAGATGATGCT	7	-	6336	7446
ENSDARG00000007192	ENSDART00000048505	4	23	23	CTCCTCATCACTCTGTTCTGCTGAA	7	-	6488	7446
ENSDARG00000007192	ENSDART00000050620	4	9	9	ATCCACATCTGATTATGAAGGATTT	7	-	2366	8577
ENSDARG00000007192	ENSDART00000050620	4	9	9	AGAACCTCCAACCAGATGGGTTT	5	-	2324	8577
ENSDARG00000007192	ENSDART00000050620	4	9	9	AGAACCTCCAACCAGATGGGTTTCT	7	-	2322	8577
ENSDARG00000007192	ENSDART00000050620	4	12	12	CAATCCCACAATTCAGCTGTTTAC	6	-	3389	8577
ENSDARG00000007192	ENSDART00000050620	4	12	12	GCAATCCCACAATTCAGCTGTTTAC	7	-	3389	8577
ENSDARG00000007192	ENSDART00000050620	4	13	13	AGCCACAGCCCAGCTGTCTGCAGAC	7	-	3715	8577
ENSDARG00000007192	ENSDART00000050620	4	13	13	AGAGCCAGAGACGAGTCTGAAGAT	6	-	3570	8577
ENSDARG00000007192	ENSDART00000050620	4	13	13	AGAGCCACAGCCCAGCTGTCTGC	5	-	3719	8577
ENSDARG00000007192	ENSDART00000050620	4	14	14	GGCCACTCCACACTGCAGCTGTC	5	-	4031	8577
ENSDARG00000007192	ENSDART00000050620	4	14	14	TCCTACATCCTCTTTGTGTAGAC	5	-	4184	8577
ENSDARG00000007192	ENSDART00000050620	4	14	14	GTCTGCACACCACATGGGCATCT	5	-	4011	8577
ENSDARG00000007192	ENSDART00000050620	4	14	14	GACTCCTACATCCTCTTTGTGTAG	6	-	4186	8577
ENSDARG00000007192	ENSDART00000050620	4	14	14	CACTCCACACTGCAGCTGTCTGC	5	-	4028	8577
ENSDARG00000007192	ENSDART00000050620	4	15	15	TTATCAAGCCAGTTAGGAGCAGAT	6	-	4395	8577
ENSDARG00000007192	ENSDART00000050620	4	15	15	TTCATCTTCATTACAGTAGTTTTG	6	-	4477	8577
ENSDARG00000007192	ENSDART00000050620	4	16	16	TGCTCCACAACCCAGCTGCCTGC	5	-	4649	8577
ENSDARG00000007192	ENSDART00000050620	4	16	16	TTCACCAGCACCAAAGGCTGAATTC	7	-	4689	8577
ENSDARG00000007192	ENSDART00000050620	4	16	16	CCCCTCCACGCAGTCTAAGAGGAA	6	-	4529	8577
ENSDARG00000007192	ENSDART00000050620	4	16	16	GCCGTCCCCTCCACGCAGTCTAA	5	-	4535	8577
ENSDARG00000007192	ENSDART00000050620	4	21	21	CAATCCCACAATTCAGCTGTTTAC	6	-	6218	8577
ENSDARG00000007192	ENSDART00000050620	4	21	21	GCAATCCCACAATTCAGCTGTTTAC	7	-	6218	8577
ENSDARG00000007192	ENSDART00000050620	4	22	22	AGAGCCAGAGACGAGTCTGAAGAA	6	-	6399	8577
ENSDARG00000007192	ENSDART00000050620	4	22	22	AGAGCCACAGCCCAGCTGTCTGC	5	-	6548	8577
ENSDARG00000007192	ENSDART00000050620	4	22	22	AGCCACAGCCCAGCTGTCTGCAGAC	7	-	6544	8577
ENSDARG00000007192	ENSDART00000050620	4	23	23	GGCCACTCCACACTGCAGCTGTC	5	-	6860	8577
ENSDARG00000007192	ENSDART00000050620	4	23	23	GTCTGCACACCACATGGGCATCT	5	-	6840	8577
ENSDARG00000007192	ENSDART00000050620	4	23	23	CACTCCACACTGCAGCTGTCTGC	5	-	6857	8577
ENSDARG00000007192	ENSDART00000050620	4	23	23	GTTTTCCCCAGCCTGGAGAAGAG	5	-	6984	8577
ENSDARG00000007192	ENSDART00000050620	4	23	23	TCCTACATCCTCCTTGTGTTGAC	5	-	7013	8577
ENSDARG00000007192	ENSDART00000050620	4	24	24	CACTTCATCACCACAGTCTTTTAG	6	-	7303	8577
ENSDARG00000007192	ENSDART00000050620	4	25	25	TTCACCAGCACCAAAGGCTGAATTT	7	-	7512	8577
ENSDARG00000007192	ENSDART00000050620	4	25	25	TGCTCCACATCCCAGCTGCCTGC	5	-	7472	8577
ENSDARG00000007192	ENSDART00000050620	4	25	25	GCCCCCTCCACGCAGTCTGAGAG	5	-	7355	8577
ENSDARG00000007192	ENSDART00000050620	4	25	25	CGCCCCCTCCACGCAGTCTGAGAG	6	-	7355	8577
ENSDARG00000007192	ENSDART00000050620	4	26	26	ACCAGCCTCACGTTTGCTGTAGAC	6	-	7653	8577
ENSDARG00000007192	ENSDART00000050620	4	26	26	CTCTGCACACCACTGCAGTGTTT	5	-	7764	8577
ENSDARG00000007192	ENSDART00000050620	4	26	26	CAACCAGCCTCACGTTTGCTGTA	5	-	7656	8577
ENSDARG00000007192	ENSDART00000050620	4	26	26	CAACACGCATTGTATCTGAAGTA	5	-	7803	8577
ENSDARG00000007192	ENSDART00000050620	4	28	28	ATCATCAGCATGATTAGCCTGATGT	7	-	8541	8577
ENSDARG00000007192	ENSDART00000102457	4	1	1	CAATCCCACAATTCAGCTGTTTAC	6	-	125	2817
ENSDARG00000007192	ENSDART00000102457	4	1	1	GCAATCCCACAATTCAGCTGTTTAC	7	-	125	2817
ENSDARG00000007192	ENSDART00000102457	4	2	2	TCCTACATCCTCCTTGTGTAGAC	5	-	596	2817
ENSDARG00000007192	ENSDART00000102457	4	2	2	GTTTCCCCCAGCCTGGAGAAGAG	5	-	567	2817
ENSDARG00000007192	ENSDART00000102457	4	2	2	GTCTGCACACCACATGGGCATCT	5	-	423	2817
ENSDARG00000007192	ENSDART00000102457	4	2	2	GGCCACTCCACACTGCAGCTGTC	5	-	443	2817
ENSDARG00000007192	ENSDART00000102457	4	2	2	CACTCCACACTGCAGCTGTCTGC	5	-	440	2817
ENSDARG00000007192	ENSDART00000102457	4	3	3	ATCCCCTCCACGCAGTCTGAGAG	5	-	641	2817
ENSDARG00000007192	ENSDART00000102457	4	3	3	TGCTCCACAACCCAGCTGCCTGC	5	-	758	2817
ENSDARG00000007192	ENSDART00000102457	4	3	3	TTCACCAGCACCAAAGGCTGAATTC	7	-	798	2817
ENSDARG00000007192	ENSDART00000102460	4	9	9	GCAATCCCACAATTCAGCTGTTTAC	7	-	2297	3735
ENSDARG00000007192	ENSDART00000102460	4	9	9	CAATCCCACAATTCAGCTGTTTAC	6	-	2297	3735
ENSDARG00000007192	ENSDART00000102460	4	10	10	AGCCACAGCCCAGCTGTCTGCAGAC	7	-	2623	3735
ENSDARG00000007192	ENSDART00000102460	4	10	10	AGAGCCAGAGACGAGTCTGAAGAT	6	-	2478	3735
ENSDARG00000007192	ENSDART00000102460	4	10	10	AGAGCCACAGCCCAGCTGTCTGC	5	-	2627	3735
ENSDARG00000007192	ENSDART00000102460	4	11	11	TCCTACATCCTCTTTGTGTAGAC	5	-	3092	3735
ENSDARG00000007192	ENSDART00000102460	4	11	11	GTCTGCACACCACATGGGCATCT	5	-	2919	3735
ENSDARG00000007192	ENSDART00000102460	4	11	11	GGCCACTCCACACTGCAGCTGTC	5	-	2939	3735
ENSDARG00000007192	ENSDART00000102460	4	11	11	GACTCCTACATCCTCTTTGTGTAG	6	-	3094	3735
ENSDARG00000007192	ENSDART00000102460	4	11	11	CACTCCACACTGCAGCTGTCTGC	5	-	2936	3735
ENSDARG00000007192	ENSDART00000102460	4	12	12	TTATCAAGCCAGTTAGGAGCAGAT	6	-	3303	3735
ENSDARG00000007192	ENSDART00000102460	4	12	12	TTCATCTTCATTACAGTAGTTTTG	6	-	3385	3735
ENSDARG00000007192	ENSDART00000102460	4	13	13	TTCACCAGCACCAAAGGCTGAATTC	7	-	3597	3735
ENSDARG00000007192	ENSDART00000102460	4	13	13	GCCGTCCCCTCCACGCAGTCTAA	5	-	3443	3735
ENSDARG00000007192	ENSDART00000102460	4	13	13	TGCTCCACAACCCAGCTGCCTGC	5	-	3557	3735
ENSDARG00000007192	ENSDART00000102460	4	13	13	CCCCTCCACGCAGTCTAAGAGGAA	6	-	3437	3735
ENSDARG00000007192	ENSDART00000102465	4	1	1	GTTCACCCCATCCTTTTGACGTA	5	-	264	3459
ENSDARG00000007192	ENSDART00000102465	4	9	9	TCCTACATCCTCTTTGTGTAGAC	5	-	2492	3459
ENSDARG00000007192	ENSDART00000102465	4	9	9	GACTCCTACATCCTCTTTGTGTAG	6	-	2494	3459
ENSDARG00000007192	ENSDART00000102465	4	9	9	GTCTGCACACCACATGGGCATCT	5	-	2319	3459
ENSDARG00000007192	ENSDART00000102465	4	9	9	GGCCACTCCACACTGCAGCTGTC	5	-	2339	3459
ENSDARG00000007192	ENSDART00000102465	4	9	9	CACTCCACACTGCAGCTGTCTGC	5	-	2336	3459
ENSDARG00000007192	ENSDART00000102465	4	13	13	GTCTGCACACCACATGGGCATCT	5	-	3261	3459
ENSDARG00000007192	ENSDART00000102465	4	13	13	GGCCACTCCACACTGCAGCTGTC	5	-	3281	3459
ENSDARG00000007192	ENSDART00000102465	4	13	13	GTTTTCCCCAGCCTGGAGAAGAG	5	-	3405	3459
ENSDARG00000007192	ENSDART00000102465	4	13	13	TCCTACATCCTCCTTGTGTTGAC	5	-	3434	3459
ENSDARG00000007192	ENSDART00000102465	4	13	13	CACTCCACACTGCAGCTGTCTGC	5	-	3278	3459
ENSDARG00000007192	ENSDART00000102469	4	10	10	GCAATCCCACAATTCAGCTGTTTAC	7	-	2285	3717
ENSDARG00000007192	ENSDART00000102469	4	10	10	CAATCCCACAATTCAGCTGTTTAC	6	-	2285	3717
ENSDARG00000007192	ENSDART00000102469	4	11	11	AGCCACAGCCCAGCTGTCTGCAGAC	7	-	2611	3717
ENSDARG00000007192	ENSDART00000102469	4	11	11	AGAGCCAGAGACGAGTCTGAAGAA	6	-	2466	3717
ENSDARG00000007192	ENSDART00000102469	4	11	11	AGAGCCACAGCCCAGCTGTCTGC	5	-	2615	3717
ENSDARG00000007192	ENSDART00000102469	4	12	12	CACTCCACACTGCAGCTGTCTGC	5	-	2924	3717
ENSDARG00000007192	ENSDART00000102469	4	12	12	TCCTACATCCTCCTTGTGTTGAC	5	-	3080	3717
ENSDARG00000007192	ENSDART00000102469	4	12	12	GTTTTCCCCAGCCTGGAGAAGAG	5	-	3051	3717
ENSDARG00000007192	ENSDART00000102469	4	12	12	GTCTGCACACCACATGGGCATCT	5	-	2907	3717
ENSDARG00000007192	ENSDART00000102469	4	12	12	GGCCACTCCACACTGCAGCTGTC	5	-	2927	3717
ENSDARG00000007192	ENSDART00000102469	4	13	13	CACTTCATCACCACAGTCTTTTAG	6	-	3370	3717
ENSDARG00000007192	ENSDART00000102469	4	14	14	GCCCCCTCCACGCAGTCTGAGAG	5	-	3422	3717
ENSDARG00000007192	ENSDART00000102469	4	14	14	CGCCCCCTCCACGCAGTCTGAGAG	6	-	3422	3717
ENSDARG00000007192	ENSDART00000102469	4	14	14	TGCTCCACATCCCAGCTGCCTGC	5	-	3539	3717
ENSDARG00000007192	ENSDART00000102469	4	14	14	TTCACCAGCACCAAAGGCTGAATTT	7	-	3579	3717
ENSDARG00000007277	ENSDART00000014818	4	1	1	TTACCATGCTCTCTGAGCAGCTGGA	7	-	442	711
ENSDARG00000007277	ENSDART00000014818	4	1	1	TCCATCGGCAGGCTGTAGTAGTT	5	-	391	711
ENSDARG00000007277	ENSDART00000014818	4	1	1	CTCTCCATCGGCAGGCTGTAGTA	5	-	394	711
ENSDARG00000007277	ENSDART00000014818	4	1	1	AAACTCTAAATCTTCAGGAGACGAA	7	-	57	711
ENSDARG00000007315	ENSDART00000016690	4	1	1	ACAACCCACCCTGCCGGAGCGGCT	6	-	232	2055
ENSDARG00000007315	ENSDART00000016690	4	1	1	CAACCCACCCTGCCGGAGCGGCT	5	-	232	2055
ENSDARG00000007315	ENSDART00000016690	4	1	1	AGCCGCTACTTTTTTTGTTTTGCA	6	-	149	2055
ENSDARG00000007315	ENSDART00000016690	4	3	3	TCCAGCAGCTTCTGAAGCCGCTTCT	7	-	386	2055
ENSDARG00000007315	ENSDART00000016690	4	3	3	TACACCTTCCTAGTGGATGCTGAT	6	-	360	2055
ENSDARG00000007315	ENSDART00000016690	4	3	3	GTTACCTTCCTCCCTGTCGCTGTA	6	-	496	2055
ENSDARG00000007315	ENSDART00000016690	4	6	6	AACTGCAAAACACTCTGCAGACGAG	7	-	768	2055
ENSDARG00000007315	ENSDART00000016690	4	7	7	GAACAACACCTTGTCAGAGGATGAG	7	-	936	2055
ENSDARG00000007315	ENSDART00000016690	4	7	7	AACAACACCTTGTCAGAGGATGAG	6	-	936	2055
ENSDARG00000007315	ENSDART00000016690	4	15	15	GCCGACGGCAGGTCGCGCTGAAGAT	7	-	1696	2055
ENSDARG00000007315	ENSDART00000016690	4	15	15	ACCCACACCGGCAGACTGCGGCGGG	7	-	1925	2055
ENSDARG00000007315	ENSDART00000042874	4	1	1	CAACCCACCCTGCCGGAGCGGCT	5	-	232	1545
ENSDARG00000007315	ENSDART00000042874	4	1	1	AGCCGCTACTTTTTTTGTTTTGCA	6	-	149	1545
ENSDARG00000007315	ENSDART00000042874	4	1	1	ACAACCCACCCTGCCGGAGCGGCT	6	-	232	1545
ENSDARG00000007315	ENSDART00000042874	4	3	3	GTTACCTTCCTCCCTGTCGCTGTA	6	-	496	1545
ENSDARG00000007315	ENSDART00000042874	4	3	3	TACACCTTCCTAGTGGATGCTGAT	6	-	360	1545
ENSDARG00000007315	ENSDART00000042874	4	3	3	TCCAGCAGCTTCTGAAGCCGCTTCT	7	-	386	1545
ENSDARG00000007315	ENSDART00000042874	4	11	11	ACCCACACCGGCAGACTGCGGCGGG	7	-	1415	1545
ENSDARG00000007315	ENSDART00000042874	4	11	11	GCCGACGGCAGGTCGCGCTGAAGAT	7	-	1186	1545
ENSDARG00000007315	ENSDART00000044005	4	1	1	CAACCCACCCTGCCGGAGCGGCT	5	-	232	1107
ENSDARG00000007315	ENSDART00000044005	4	1	1	AGCCGCTACTTTTTTTGTTTTGCA	6	-	149	1107
ENSDARG00000007315	ENSDART00000044005	4	1	1	ACAACCCACCCTGCCGGAGCGGCT	6	-	232	1107
ENSDARG00000007315	ENSDART00000044005	4	3	3	TCCAGCAGCTTCTGAAGCCGCTTCT	7	-	386	1107
ENSDARG00000007315	ENSDART00000044005	4	3	3	GTTACCTTCCTCCCTGTCGCTGTA	6	-	496	1107
ENSDARG00000007315	ENSDART00000044005	4	3	3	TACACCTTCCTAGTGGATGCTGAT	6	-	360	1107
ENSDARG00000007315	ENSDART00000044005	4	6	6	ACCCACACCGGCAGACTGCGGCGGG	7	-	977	1107
ENSDARG00000007315	ENSDART00000044005	4	6	6	GCCGACGGCAGGTCGCGCTGAAGAT	7	-	748	1107
ENSDARG00000007315	ENSDART00000101307	4	1	1	ACAACCCACCCTGCCGGAGCGGCT	6	-	232	969
ENSDARG00000007315	ENSDART00000101307	4	1	1	AGCCGCTACTTTTTTTGTTTTGCA	6	-	149	969
ENSDARG00000007315	ENSDART00000101307	4	1	1	CAACCCACCCTGCCGGAGCGGCT	5	-	232	969
ENSDARG00000007315	ENSDART00000101307	4	3	3	TCCAGCAGCTTCTGAAGCCGCTTCT	7	-	386	969
ENSDARG00000007315	ENSDART00000101307	4	3	3	TACACCTTCCTAGTGGATGCTGAT	6	-	360	969
ENSDARG00000007315	ENSDART00000101307	4	3	3	GTTACCTTCCTCCCTGTCGCTGTA	6	-	496	969
ENSDARG00000007315	ENSDART00000101307	4	6	6	GCCGACGGCAGGTCGCGCTGAAGAT	7	-	709	969
ENSDARG00000007315	ENSDART00000101307	4	7	7	ACCCACACCGGCAGACTGCGGCGGG	7	-	881	969
ENSDARG00000007371	ENSDART00000040424	4	1	1	TTCGGCAGACACTATGTGGTGGT	5	+	19	1785
ENSDARG00000007371	ENSDART00000040424	4	1	1	TTCGGCAGACACTATGTGGTGGTC	6	+	19	1785
ENSDARG00000007371	ENSDART00000040424	4	2	2	ATCAGCACAGGACTAGTGGCAGTG	6	+	247	1785
ENSDARG00000007371	ENSDART00000040424	4	3	3	CAAGACACCTGTCAGTGGGTATGT	6	+	371	1785
ENSDARG00000007371	ENSDART00000040424	4	4	4	TTCAACATCACTGGATTTGAAGGG	6	+	460	1785
ENSDARG00000007371	ENSDART00000040424	4	5	5	GTTTTCAGCTTGTAATGGGGCTGC	6	+	542	1785
ENSDARG00000007371	ENSDART00000040424	4	5	5	GTTTTCAGCTTGTAATGGGGCTGCT	7	+	542	1785
ENSDARG00000007371	ENSDART00000040424	4	6	6	CAAGTCTAAACTACCTGTGCCGAT	6	+	825	1785
ENSDARG00000007371	ENSDART00000040424	4	13	13	AAAGACTACACATCTGTGAGTGC	5	+	1579	1785
ENSDARG00000007371	ENSDART00000040424	4	14	14	TCCCTCACCCATCTTCTTTGCTAAC	7	+	1635	1785
ENSDARG00000007371	ENSDART00000040424	4	14	14	TACAACAAATTATAGGTGTTTGT	5	+	1721	1785
ENSDARG00000007371	ENSDART00000040424	4	14	14	CCCTCACCCATCTTCTTTGCTAAC	6	+	1636	1785
ENSDARG00000007405	ENSDART00000013224	4	3	2	AAAATCTGCTGCGGCCGTTGCTGCT	7	-	228	987
ENSDARG00000007405	ENSDART00000013224	4	3	2	TGCTGCGGCCGTTGCTGCTTTTGTA	7	-	222	987
ENSDARG00000007405	ENSDART00000013224	4	3	2	ATCTGCTGCGGCCGTTGCTGCTTTT	7	-	225	987
ENSDARG00000007405	ENSDART00000013224	4	5	4	ACCTGCTTCAGGTTTGCTGAGGTC	6	-	391	987
ENSDARG00000007405	ENSDART00000013224	4	5	4	ACCTGCTTCAGGTTTGCTGAGGT	5	-	392	987
ENSDARG00000007405	ENSDART00000013224	4	7	6	GTCTTCACCGCCTCGTTTGTGTTC	6	-	525	987
ENSDARG00000007405	ENSDART00000013224	4	8	7	TCCTCCAGCCACAAAGAAGTCTTT	6	-	715	987
ENSDARG00000007405	ENSDART00000013224	4	9	8	TCCAAAGGCCGTATGTTTTGCCTAC	7	-	898	987
ENSDARG00000007405	ENSDART00000013224	4	10	9	GACTCAGGCCTTGATCTCTGCTGGA	7	-	978	987
ENSDARG00000007413	ENSDART00000019144	4	1	1	CTCCGCTGCTCGGGGAGGTTTTT	5	-	28	4722
ENSDARG00000007413	ENSDART00000019144	4	1	1	CGCTCACCCTCTGCTGTGGTGAA	5	-	86	4722
ENSDARG00000007413	ENSDART00000019144	4	1	1	TTCCTCCGCTGCTCGGGGAGGTT	5	-	31	4722
ENSDARG00000007413	ENSDART00000019144	4	1	1	TTCCTCCGCTGCTCGGGGAGGTTTT	7	-	29	4722
ENSDARG00000007413	ENSDART00000019144	4	5	5	GCCAGCAGCAGTGTGACGAGTTT	5	-	601	4722
ENSDARG00000007413	ENSDART00000019144	4	6	6	GAATACAGCAGAAAAGCTGCCTAA	6	-	649	4722
ENSDARG00000007413	ENSDART00000019144	4	8	8	TGCCGCAGCTGGATGAAGGTGCA	5	-	976	4722
ENSDARG00000007413	ENSDART00000019144	4	8	8	AGCTGCCGCAGCTGGATGAAGGT	5	-	979	4722
ENSDARG00000007413	ENSDART00000019144	4	8	8	CTCCACGTCCCCAATGCCGGTGTT	6	-	835	4722
ENSDARG00000007413	ENSDART00000019144	4	9	9	ACACTCACCCCTCATTTTGAGAA	5	-	1118	4722
ENSDARG00000007413	ENSDART00000019144	4	9	9	AAATCAACCGGATCCAGCTGAAGCT	7	-	1034	4722
ENSDARG00000007413	ENSDART00000019144	4	10	10	CTATGCTTCTCTCCACGGAGGAGAT	7	-	1318	4722
ENSDARG00000007413	ENSDART00000019144	4	13	13	ACCTCAAAATGAGCATTTAGCCTAC	7	-	1586	4722
ENSDARG00000007413	ENSDART00000019144	4	13	13	CTCACCGCAGGCATTTGTAGAAGTT	7	-	1705	4722
ENSDARG00000007413	ENSDART00000019144	4	14	14	AACACCAACCACGTGGATTTGAG	5	-	1784	4722
ENSDARG00000007413	ENSDART00000019144	4	15	15	GTATACGACTTGCGGACTGGGCG	5	-	2885	4722
ENSDARG00000007413	ENSDART00000019144	4	15	15	GTTACCGGCATTGTTGGGGTCGCT	6	-	3889	4722
ENSDARG00000007413	ENSDART00000019144	4	15	15	GTCCGCGTCCTCCAGCGGTCTCT	5	-	3815	4722
ENSDARG00000007413	ENSDART00000019144	4	15	15	GTTTTCCACCAGGGGTGGAAGGA	5	-	2817	4722
ENSDARG00000007413	ENSDART00000019144	4	15	15	TCCTGCTACTGGCAGAGGCGGAG	5	-	3146	4722
ENSDARG00000007413	ENSDART00000019144	4	15	15	TCCTGCTACTGGCAGAGGCGGAGTC	7	-	3144	4722
ENSDARG00000007413	ENSDART00000019144	4	15	15	TGCGGCTGCACCGGCGCTGGGTTC	6	-	2667	4722
ENSDARG00000007413	ENSDART00000019144	4	15	15	TTCCTCTTCCTTTTGGCAGATGAT	6	-	3202	4722
ENSDARG00000007413	ENSDART00000019144	4	15	15	GGCTCCTGCTACTGGCAGAGGCG	5	-	3149	4722
ENSDARG00000007413	ENSDART00000019144	4	15	15	GGCAGCGGCTGGTGGGCAGGGGGG	6	-	2095	4722
ENSDARG00000007413	ENSDART00000019144	4	15	15	AACGGCACCGGGACTCTGCATAA	5	-	2960	4722
ENSDARG00000007413	ENSDART00000019144	4	15	15	ACAGCCACCATGGTGGCGCTGTT	5	-	3910	4722
ENSDARG00000007413	ENSDART00000019144	4	15	15	ACCGCCGCATTCGGAGAAGTAGGA	6	-	2640	4722
ENSDARG00000007413	ENSDART00000019144	4	15	15	CACAGCCACCATGGTGGCGCTGTT	6	-	3910	4722
ENSDARG00000007413	ENSDART00000019144	4	15	15	CCCTCCTGCCATCAGTGGAGTGC	5	-	2405	4722
ENSDARG00000007413	ENSDART00000019144	4	15	15	GACCGCCGCATTCGGAGAAGTAGGA	7	-	2640	4722
ENSDARG00000007413	ENSDART00000019144	4	15	15	GGCAAATGCAGTGTTGGGTTGTT	5	-	2564	4722
ENSDARG00000007413	ENSDART00000019144	4	15	15	GGCAAATGCAGTGTTGGGTTGTTG	6	-	2563	4722
ENSDARG00000007413	ENSDART00000019144	4	18	18	GTTTGCTCCTCCAGTTTGAGTGC	5	-	4351	4722
ENSDARG00000007413	ENSDART00000019144	4	19	19	GCCATCAGAGCTGCACTGGGGTGGT	7	-	4463	4722
ENSDARG00000007413	ENSDART00000019144	4	20	20	ACAATCAGAGTACTTGGCGATGTT	6	-	4591	4722
ENSDARG00000007413	ENSDART00000019144	4	21	21	AGCGCCAGCACAGAGAGATGATTCT	7	-	4640	4722
ENSDARG00000007441	ENSDART00000048832	4	3	3	TGCTGCAGCTCTGAGGCGTCTTC	5	-	312	369
ENSDARG00000007441	ENSDART00000048832	4	3	3	TGCCGCTGCTGGAGCTGTATTTGCT	7	-	352	369
ENSDARG00000007441	ENSDART00000048832	4	3	3	AGATGCCGCTGCTGGAGCTGTATTT	7	-	355	369
ENSDARG00000007523	ENSDART00000008700	4	3	2	CTCACCAGATTTACAGCAGCAGCT	6	+	131	3795
ENSDARG00000007523	ENSDART00000008700	4	4	3	GGCTTCACCCACGACGATGGCTAC	6	+	406	3795
ENSDARG00000007523	ENSDART00000008700	4	4	3	CGCTCAGCACCTCGGAGGACGGC	5	+	350	3795
ENSDARG00000007523	ENSDART00000008700	4	4	3	CCCCCACCCACCCCGCCGGCGTC	5	+	214	3795
ENSDARG00000007523	ENSDART00000008700	4	4	3	GACCCCCACCCACCCCGCCGGCGTC	7	+	212	3795
ENSDARG00000007523	ENSDART00000008700	4	4	3	ACCCCCACCCACCCCGCCGGCGTC	6	+	213	3795
ENSDARG00000007523	ENSDART00000008700	4	4	3	GACATCACACGCTGCATCTGTGGCT	7	+	385	3795
ENSDARG00000007523	ENSDART00000008700	4	4	3	ACATCACACGCTGCATCTGTGGCT	6	+	386	3795
ENSDARG00000007523	ENSDART00000008700	4	6	5	ACACTCACAACAGCACGTCTGGGTA	7	+	676	3795
ENSDARG00000007523	ENSDART00000008700	4	6	5	TGCTACAGAAAGCGGAGATGAGGTT	7	+	606	3795
ENSDARG00000007523	ENSDART00000008700	4	8	7	TCCTCCCTCTCTATGGGAGAATAA	6	+	840	3795
ENSDARG00000007523	ENSDART00000008700	4	8	7	CTACAATACACACACCGCAGCCTTC	7	+	972	3795
ENSDARG00000007523	ENSDART00000008700	4	10	9	CTACTCTAAGTTTGACGGTTTGGAA	7	+	1164	3795
ENSDARG00000007523	ENSDART00000008700	4	10	9	TCCTGCACCCCTAACGCTGAAGTG	6	+	1240	3795
ENSDARG00000007523	ENSDART00000008700	4	10	9	GTTCTACTCTAAGTTTGACGGTTTG	7	+	1161	3795
ENSDARG00000007523	ENSDART00000008700	4	13	12	GGCACCTGCAACCCCTGAGGCTGAA	7	+	1860	3795
ENSDARG00000007523	ENSDART00000008700	4	13	12	ACCTGCAACCCCTGAGGCTGAATCT	7	+	1863	3795
ENSDARG00000007523	ENSDART00000008700	4	13	12	GGCACCAAAGGGGAGGTTGGTGGA	6	+	1816	3795
ENSDARG00000007523	ENSDART00000008700	4	14	13	AGCCCCAACATGCCGCAGTGGAC	5	+	2184	3795
ENSDARG00000007523	ENSDART00000008700	4	14	13	GACTCAAGATATAGAGATGCCTGT	6	+	2094	3795
ENSDARG00000007523	ENSDART00000008700	4	14	13	ACCAGCCCCAACATGCCGCAGTG	5	+	2181	3795
ENSDARG00000007523	ENSDART00000008700	4	15	14	GCCTCCCCCTGAAAGGCCGTTGCG	6	+	2292	3795
ENSDARG00000007523	ENSDART00000008700	4	15	14	AGCCTCCCCCTGAAAGGCCGTTGCG	7	+	2291	3795
ENSDARG00000007523	ENSDART00000008700	4	15	14	GTTGACAAACAGGAGCGGGTTGC	5	+	2254	3795
ENSDARG00000007523	ENSDART00000008700	4	16	15	CTCTACCCCTCAATGGAAGTTGCT	6	+	2651	3795
ENSDARG00000007523	ENSDART00000008700	4	17	16	TGCCTACACCGTTGAAGAAGAGGCG	7	+	2687	3795
ENSDARG00000007523	ENSDART00000008700	4	17	16	GTTGCCTACACCGTTGAAGAAGAG	6	+	2685	3795
ENSDARG00000007523	ENSDART00000008700	4	17	16	GCCCTCGACACCCTTGCAGATGCC	6	+	2865	3795
ENSDARG00000007523	ENSDART00000008700	4	17	16	GCCTACACCGTTGAAGAAGAGGCG	6	+	2688	3795
ENSDARG00000007523	ENSDART00000008700	4	18	17	TGCTGCTGCTGTTACTTCTGCTGCT	7	+	3072	3795
ENSDARG00000007523	ENSDART00000008700	4	18	17	TTCTGCTGCTGGTGGTGGTGGTG	5	+	3087	3795
ENSDARG00000007523	ENSDART00000008700	4	18	17	TTCTGCTGCTGGTGGTGGTGGTGGT	7	+	3087	3795
ENSDARG00000007523	ENSDART00000008700	4	18	17	TCCTTCACACACCCTGGAGATGGG	6	+	3231	3795
ENSDARG00000007523	ENSDART00000008700	4	18	17	TACTTCTGCTGCTGGTGGTGGTGGT	7	+	3084	3795
ENSDARG00000007523	ENSDART00000008700	4	18	17	ACCCACAGAAGAAAAAGGTGTGTTT	7	+	3395	3795
ENSDARG00000007523	ENSDART00000008700	4	18	17	TACGGCTCCACAGGAGTCTAGTAA	6	+	2967	3795
ENSDARG00000007523	ENSDART00000008700	4	18	17	TACTTCTGCTGCTGGTGGTGGTG	5	+	3084	3795
ENSDARG00000007523	ENSDART00000008700	4	19	18	TTCCACAGCACCACCAGTAGACGTG	7	+	3489	3795
ENSDARG00000007523	ENSDART00000008700	4	19	18	CACAGCACCACCAGTAGACGTGTTC	7	+	3492	3795
ENSDARG00000007523	ENSDART00000066903	4	3	2	CTCACCAGATTTACAGCAGCAGCT	6	+	131	1149
ENSDARG00000007523	ENSDART00000066903	4	4	3	GGCTTCACCCACGACGATGGCTAC	6	+	406	1149
ENSDARG00000007523	ENSDART00000066903	4	4	3	GACCCCCACCCACCCCGCCGGCGTC	7	+	212	1149
ENSDARG00000007523	ENSDART00000066903	4	4	3	GACATCACACGCTGCATCTGTGGCT	7	+	385	1149
ENSDARG00000007523	ENSDART00000066903	4	4	3	CGCTCAGCACCTCGGAGGACGGC	5	+	350	1149
ENSDARG00000007523	ENSDART00000066903	4	4	3	CCCCCACCCACCCCGCCGGCGTC	5	+	214	1149
ENSDARG00000007523	ENSDART00000066903	4	4	3	ACCCCCACCCACCCCGCCGGCGTC	6	+	213	1149
ENSDARG00000007523	ENSDART00000066903	4	4	3	ACATCACACGCTGCATCTGTGGCT	6	+	386	1149
ENSDARG00000007523	ENSDART00000066903	4	6	5	ACACTCACAACAGCACGTCTGGGTA	7	+	676	1149
ENSDARG00000007523	ENSDART00000066903	4	6	5	TGCTACAGAAAGCGGAGATGAGGTT	7	+	606	1149
ENSDARG00000007523	ENSDART00000066903	4	8	7	TCCTCCCTCTCTATGGGAGAATAA	6	+	840	1149
ENSDARG00000007523	ENSDART00000066903	4	9	8	GCATCCCTCAGATCGCAGGTGGC	5	+	1002	1149
ENSDARG00000007639	ENSDART00000022646	4	2	1	TCCTTCACCTCAGGGCTGCAGGA	5	-	13	2394
ENSDARG00000007639	ENSDART00000022646	4	3	2	GTATACTGCAGGGTCTTCTGGATAG	7	-	186	2394
ENSDARG00000007639	ENSDART00000022646	4	8	7	GAAGGCCACGCTTCTTTGCTGTT	5	-	832	2394
ENSDARG00000007639	ENSDART00000022646	4	8	7	GCCTCCATCTAAGGGTGGAGTCT	5	-	902	2394
ENSDARG00000007639	ENSDART00000022646	4	8	7	GGCATCTTCCCTGTGGTTTGTAA	5	-	856	2394
ENSDARG00000007639	ENSDART00000022646	4	10	9	TACTCAGGCCAGGAGGGGGTGAT	5	-	1101	2394
ENSDARG00000007639	ENSDART00000022646	4	11	10	GTTCAAGTCCAAAAAGCTGCTGTG	6	-	1789	2394
ENSDARG00000007639	ENSDART00000022646	4	11	10	GTCCAAAAAGCTGCTGTGCTGTG	5	-	1784	2394
ENSDARG00000007639	ENSDART00000022646	4	11	10	AAAAGCTGCTGTGCTGTGCAGCA	5	-	1779	2394
ENSDARG00000007639	ENSDART00000022646	4	11	10	GGCATCCCCATCCAGCTGTGCCGAG	7	-	1706	2394
ENSDARG00000007639	ENSDART00000022646	4	11	10	GCATCCCCATCCAGCTGTGCCGAG	6	-	1706	2394
ENSDARG00000007639	ENSDART00000022646	4	11	10	AAAGGCTGCTTGCCAGTCTGTAGAG	7	-	1356	2394
ENSDARG00000007639	ENSDART00000022646	4	13	12	GGCTCCAGCCGGCTCTGTGGGGGAA	7	-	2248	2394
ENSDARG00000007639	ENSDART00000022646	4	13	12	GTTCCATGCCGGCACTCTGTAGCA	6	-	2375	2394
ENSDARG00000007639	ENSDART00000022646	4	13	12	GGCTCCAGCCGGCTCTGTGGGGGA	6	-	2249	2394
ENSDARG00000007764	ENSDART00000002401	4	1	1	ACCTGCGGCTCTTAGCGGAGGCC	5	-	95	1179
ENSDARG00000007764	ENSDART00000002401	4	1	1	GACAGCCGCTCAAACTGATTGAGTC	7	-	65	1179
ENSDARG00000007764	ENSDART00000002401	4	2	2	TCCAAACACATAAAGGTTGGTGTT	6	-	163	1179
ENSDARG00000007764	ENSDART00000002401	4	2	2	TCCAAACACATAAAGGTTGGTGT	5	-	164	1179
ENSDARG00000007764	ENSDART00000002401	4	2	2	GTAATCCTCGTTTTCGGAGCCGCC	6	-	214	1179
ENSDARG00000007764	ENSDART00000002401	4	2	2	GGCCGCTCCGGGCCGGAGGAGCT	5	-	123	1179
ENSDARG00000007764	ENSDART00000002401	4	2	2	CTCCAAACACATAAAGGTTGGTGTT	7	-	163	1179
ENSDARG00000007764	ENSDART00000002401	4	2	2	CTCCAAACACATAAAGGTTGGTGT	6	-	164	1179
ENSDARG00000007764	ENSDART00000002401	4	2	2	AGATTCATCATAGTCGGGGTTGTA	6	-	190	1179
ENSDARG00000007764	ENSDART00000002401	4	2	2	AGATTCATCATAGTCGGGGTTGTAG	7	-	189	1179
ENSDARG00000007764	ENSDART00000002401	4	4	4	TCCTCAGGCAGGTCATCTGGAGGG	6	-	615	1179
ENSDARG00000007764	ENSDART00000002401	4	6	6	TACCTATTCTTTCATGAGGCTTTG	6	-	773	1179
ENSDARG00000007764	ENSDART00000002401	4	8	8	TTATGCCACTGGAACGTCTGCAGGT	7	-	902	1179
ENSDARG00000007764	ENSDART00000002401	4	9	9	GTTTACCACGCCGCCGTGGATGTA	6	-	994	1179
ENSDARG00000007764	ENSDART00000002401	4	9	9	GTCCGCTTATTCTCGTGGATGTT	5	-	1015	1179
ENSDARG00000007764	ENSDART00000067048	4	1	1	GACAGCCGCTCAAACTGATTGAGTC	7	-	65	519
ENSDARG00000007764	ENSDART00000067048	4	1	1	ACCTGCGGCTCTTAGCGGAGGCC	5	-	95	519
ENSDARG00000007764	ENSDART00000067048	4	3	3	TCCAAACACATAAAGGTTGGTGT	5	-	257	519
ENSDARG00000007764	ENSDART00000067048	4	3	3	GTAATCCTCGTTTTCGGAGCCGCC	6	-	307	519
ENSDARG00000007764	ENSDART00000067048	4	3	3	GGCCGCTCCGGGCCGGAGGAGCT	5	-	216	519
ENSDARG00000007764	ENSDART00000067048	4	3	3	TCCAAACACATAAAGGTTGGTGTT	6	-	256	519
ENSDARG00000007764	ENSDART00000067048	4	3	3	CTCCAAACACATAAAGGTTGGTGTT	7	-	256	519
ENSDARG00000007764	ENSDART00000067048	4	3	3	CTCCAAACACATAAAGGTTGGTGT	6	-	257	519
ENSDARG00000007764	ENSDART00000067048	4	3	3	AGATTCATCATAGTCGGGGTTGTAG	7	-	282	519
ENSDARG00000007764	ENSDART00000067048	4	3	3	AGATTCATCATAGTCGGGGTTGTA	6	-	283	519
ENSDARG00000008069	ENSDART00000004351	4	2	1	GCCCACACCGACTCGGTGGTGTTG	6	-	96	2085
ENSDARG00000008069	ENSDART00000004351	4	2	1	CACACCGACTCGGTGGTGTTGCA	5	-	94	2085
ENSDARG00000008069	ENSDART00000004351	4	2	1	GCCCACACCGACTCGGTGGTGTT	5	-	97	2085
ENSDARG00000008069	ENSDART00000004351	4	2	1	TGCCCACACCGACTCGGTGGTGTT	6	-	97	2085
ENSDARG00000008069	ENSDART00000004351	4	2	1	TGCCCACACCGACTCGGTGGTGTTG	7	-	96	2085
ENSDARG00000008069	ENSDART00000004351	4	3	2	GTTGCCTTCAAGCTCTGTCGTCGAA	7	-	650	2085
ENSDARG00000008069	ENSDART00000004351	4	3	2	GTAGTCATCACACAAGTAGCAGTA	6	-	232	2085
ENSDARG00000008069	ENSDART00000004351	4	3	2	TCCTGCGCATCCTGCTGTGCATAA	6	-	1281	2085
ENSDARG00000008069	ENSDART00000004351	4	3	2	TACGGCCACTACGTGTGGTGACTTC	7	-	331	2085
ENSDARG00000008069	ENSDART00000004351	4	3	2	CTCCTCTTCCTCCTGTTGCCGTT	5	-	533	2085
ENSDARG00000008069	ENSDART00000004351	4	3	2	AACTGCAGCTCCTGCGTGCTAGGTG	7	-	392	2085
ENSDARG00000008069	ENSDART00000004351	4	3	2	CAACTCTTCCTTGAGCTGCCGTT	5	-	596	2085
ENSDARG00000008069	ENSDART00000004351	4	3	2	AGCTGCCACACAGAATGCAGCATTG	7	-	1238	2085
ENSDARG00000008069	ENSDART00000004351	4	4	3	GCATCCTTACTGTTGCTGTGGTA	5	-	1534	2085
ENSDARG00000008069	ENSDART00000004351	4	4	3	TTCCAATGCCTCAGTCTCTGTAAAC	7	-	1596	2085
ENSDARG00000008069	ENSDART00000004351	4	4	3	TGCAGCATCCTTACTGTTGCTGTG	6	-	1537	2085
ENSDARG00000008069	ENSDART00000004351	4	4	3	CAAGCCACAAGGAACTTGTGCAGCA	7	-	1554	2085
ENSDARG00000008069	ENSDART00000004351	4	6	5	GACAGCAGAAAGTTGGTAGAGGAA	6	-	1876	2085
ENSDARG00000008069	ENSDART00000100645	4	1	1	TGCCCACACCGACTCGGTGGTGTTG	7	-	96	2028
ENSDARG00000008069	ENSDART00000100645	4	1	1	GCCCACACCGACTCGGTGGTGTTG	6	-	96	2028
ENSDARG00000008069	ENSDART00000100645	4	1	1	CACACCGACTCGGTGGTGTTGCA	5	-	94	2028
ENSDARG00000008069	ENSDART00000100645	4	1	1	GCCCACACCGACTCGGTGGTGTT	5	-	97	2028
ENSDARG00000008069	ENSDART00000100645	4	1	1	TGCCCACACCGACTCGGTGGTGTT	6	-	97	2028
ENSDARG00000008069	ENSDART00000100645	4	2	2	GTAGTCATCACACAAGTAGCAGTA	6	-	232	2028
ENSDARG00000008069	ENSDART00000100645	4	2	2	TACGGCCACTACGTGTGGTGACTTC	7	-	331	2028
ENSDARG00000008069	ENSDART00000100645	4	2	2	GTTGCCTTCAAGCTCTGTCGTCGAA	7	-	650	2028
ENSDARG00000008069	ENSDART00000100645	4	2	2	CTCCTCTTCCTCCTGTTGCCGTT	5	-	533	2028
ENSDARG00000008069	ENSDART00000100645	4	2	2	CAACTCTTCCTTGAGCTGCCGTT	5	-	596	2028
ENSDARG00000008069	ENSDART00000100645	4	2	2	AACTGCAGCTCCTGCGTGCTAGGTG	7	-	392	2028
ENSDARG00000008069	ENSDART00000100645	4	3	3	AGCTGCCACACAGAATGCAGCATTG	7	-	1208	2028
ENSDARG00000008069	ENSDART00000100645	4	3	3	TCCTGCGCATCCTGCTGTGCATAA	6	-	1251	2028
ENSDARG00000008069	ENSDART00000100645	4	4	4	TTCCAATGCCTCAGTCTCTGTAAAC	7	-	1566	2028
ENSDARG00000008069	ENSDART00000100645	4	4	4	TGCAGCATCCTTACTGTTGCTGTG	6	-	1507	2028
ENSDARG00000008069	ENSDART00000100645	4	4	4	GCATCCTTACTGTTGCTGTGGTA	5	-	1504	2028
ENSDARG00000008069	ENSDART00000100645	4	4	4	CAAGCCACAAGGAACTTGTGCAGCA	7	-	1524	2028
ENSDARG00000008069	ENSDART00000100645	4	6	6	GACAGCAGAAAGTTGGTAGAGGAA	6	-	1846	2028
ENSDARG00000008235	ENSDART00000021953	4	5	5	CTCGCCCGCTTACAGGTGTTTGT	5	+	364	2433
ENSDARG00000008235	ENSDART00000021953	4	6	6	GGCAGCTGCAAGGGGGCAGCAGGG	6	+	440	2433
ENSDARG00000008235	ENSDART00000021953	4	6	6	GCAAAAGACTGCAGGGGCAGCTGCA	7	+	425	2433
ENSDARG00000008235	ENSDART00000021953	4	6	6	AGCAAAAGACTGCAGGGGCAGCT	5	+	424	2433
ENSDARG00000008235	ENSDART00000021953	4	12	12	CACGCCAAACCAGATTATGAGTG	5	+	1246	2433
ENSDARG00000008235	ENSDART00000021953	4	12	12	GCCAAACCAGATTATGAGTGAGTA	6	+	1249	2433
ENSDARG00000008235	ENSDART00000021953	4	12	12	CGCCAAACCAGATTATGAGTGAGTA	7	+	1248	2433
ENSDARG00000008235	ENSDART00000021953	4	13	13	CTCTTCAGCCATATGAAGCAGCT	5	+	1289	2433
ENSDARG00000008235	ENSDART00000021953	4	14	14	TCCGGCCTCACGATTGCAGTGGCC	6	+	1453	2433
ENSDARG00000008235	ENSDART00000021953	4	14	14	TTCTGCGTCAAGTCGGAGCAGTT	5	+	1504	2433
ENSDARG00000008235	ENSDART00000021953	4	14	14	GAACGCCGCCAAGACGGTGCAGCT	6	+	1479	2433
ENSDARG00000008235	ENSDART00000021953	4	14	14	CTCTTCTGCGTCAAGTCGGAGCA	5	+	1501	2433
ENSDARG00000008235	ENSDART00000021953	4	14	14	AACGCCGCCAAGACGGTGCAGCT	5	+	1480	2433
ENSDARG00000008235	ENSDART00000021953	4	17	17	TTACTATGCATCAGGAGGATTTC	5	+	1778	2433
ENSDARG00000008235	ENSDART00000021953	4	18	18	TGCGTCCACTCGGAGAGGGTGGGAA	7	+	1991	2433
ENSDARG00000008235	ENSDART00000021953	4	18	18	TGCGTCCACTCGGAGAGGGTGGG	5	+	1991	2433
ENSDARG00000008235	ENSDART00000021953	4	18	18	TCCTGCGTCCACTCGGAGAGGGT	5	+	1988	2433
ENSDARG00000008235	ENSDART00000021953	4	18	18	TACTTCCGCCCGCTGCAGTGTCT	5	+	1894	2433
ENSDARG00000008235	ENSDART00000021953	4	18	18	GACTACTTCCGCCCGCTGCAGTG	5	+	1891	2433
ENSDARG00000008398	ENSDART00000016938	4	2	2	CTCGTCCTCATTCAGACTGGGGA	5	-	101	6588
ENSDARG00000008398	ENSDART00000016938	4	2	2	GCCAACGACGGACTGGAATAGTTG	6	-	72	6588
ENSDARG00000008398	ENSDART00000016938	4	5	5	ACCACCATCCCCTTTAGTGGCCTGC	7	-	678	6588
ENSDARG00000008398	ENSDART00000016938	4	9	9	AGCTGCTGCTTCTCACGGAGCTTCT	7	-	1313	6588
ENSDARG00000008398	ENSDART00000016938	4	11	11	GTACTAACCTGAATTTGGATTTGGA	7	-	1540	6588
ENSDARG00000008398	ENSDART00000016938	4	12	12	ATCACCAGCCAGTAGAAGACGTT	5	-	1618	6588
ENSDARG00000008398	ENSDART00000016938	4	12	12	AAAATCACCAGCCAGTAGAAGAC	5	-	1621	6588
ENSDARG00000008398	ENSDART00000016938	4	12	12	AGCCACTCCGGCTGCTGGTGATGCT	7	-	1679	6588
ENSDARG00000008398	ENSDART00000016938	4	13	13	AGAGCCAGCAGCACCTTATTGGCT	6	-	1722	6588
ENSDARG00000008398	ENSDART00000016938	4	15	15	GTTTCCACAGATGAAGAGGATGAT	6	-	2242	6588
ENSDARG00000008398	ENSDART00000016938	4	15	15	TTCCACAGATGAAGAGGATGATGAA	7	-	2239	6588
ENSDARG00000008398	ENSDART00000016938	4	16	16	CTCTTCCTCTTTCTGCGCTGATGTT	7	-	2328	6588
ENSDARG00000008398	ENSDART00000016938	4	16	16	CTCCTCTTCCTCTTTCTGCGCTGAT	7	-	2331	6588
ENSDARG00000008398	ENSDART00000016938	4	17	17	CTCTCCATCTGAAGTGATGGATTT	6	-	2461	6588
ENSDARG00000008398	ENSDART00000016938	4	17	17	TTCATCCTCTAGGGGTGGTTTCT	5	-	2414	6588
ENSDARG00000008398	ENSDART00000016938	4	17	17	GTTGGCGTCTCTCCATCTGAAGTG	6	-	2469	6588
ENSDARG00000008398	ENSDART00000016938	4	24	24	TGCAGCAAAGAGGTGACGATGAC	5	-	3142	6588
ENSDARG00000008398	ENSDART00000016938	4	24	24	AACTGCAGCAAAGAGGTGACGAT	5	-	3145	6588
ENSDARG00000008398	ENSDART00000016938	4	25	25	GCACTCAGCCTGCGTCTGTTTAG	5	-	3230	6588
ENSDARG00000008398	ENSDART00000016938	4	25	25	GCCTGCGTCTGTTTAGAAGTGTCT	6	-	3222	6588
ENSDARG00000008398	ENSDART00000016938	4	27	27	GGCCCAACATCCTCTGCATGGGAG	6	-	3423	6588
ENSDARG00000008398	ENSDART00000016938	4	27	27	AACATCCTCTGCATGGGAGTCGAT	6	-	3418	6588
ENSDARG00000008398	ENSDART00000016938	4	27	27	ATCCTCTGCATGGGAGTCGATGGC	6	-	3415	6588
ENSDARG00000008398	ENSDART00000016938	4	28	28	GTTCACCACGTACCAGACTTTGTA	6	-	3673	6588
ENSDARG00000008398	ENSDART00000016938	4	32	32	TACCACAGAGGAGGGGGGAGAGGAG	7	-	4056	6588
ENSDARG00000008398	ENSDART00000016938	4	33	33	GTTATCCTCAGTGTTTTGGAGGC	5	-	4091	6588
ENSDARG00000008398	ENSDART00000016938	4	36	36	AAAAGCTAACAAAGTAGAAGATGGC	7	-	4498	6588
ENSDARG00000008398	ENSDART00000016938	4	36	36	GACCCCTTCTCACAAGGGCGGTTTG	7	-	4433	6588
ENSDARG00000008398	ENSDART00000016938	4	37	37	GAACTCATCTAGATGATGCGGTC	5	-	4613	6588
ENSDARG00000008398	ENSDART00000016938	4	38	38	TCCAAATCCAAGAGGTGGCTGAA	5	-	4715	6588
ENSDARG00000008398	ENSDART00000016938	4	38	38	TTCCAAATCCAAGAGGTGGCTGAA	6	-	4715	6588
ENSDARG00000008398	ENSDART00000016938	4	39	39	CACACCTTCGGTTTTGATGCGTAG	6	-	4852	6588
ENSDARG00000008398	ENSDART00000016938	4	39	39	TTACACACCTTCGGTTTTGATGCG	6	-	4855	6588
ENSDARG00000008398	ENSDART00000016938	4	43	43	GAAAGCACCATGTGGGTCGTGGCA	6	-	5543	6588
ENSDARG00000008398	ENSDART00000016938	4	43	43	ACCAGCTTCTGATGAGAGGGAGAT	6	-	5367	6588
ENSDARG00000008398	ENSDART00000016938	4	47	47	ACAGACGGCATGCTGCTGTTGAGCT	7	-	6083	6588
ENSDARG00000008398	ENSDART00000016938	4	47	47	TGCGCCCTCCCGCTGTGGTTGCC	5	-	6139	6588
ENSDARG00000008398	ENSDART00000016938	4	47	47	ACAGACGGCATGCTGCTGTTGAG	5	-	6085	6588
ENSDARG00000008398	ENSDART00000016938	4	47	47	TACCGCCTCCACGAGGCTGCCGGC	6	-	6229	6588
ENSDARG00000008398	ENSDART00000016938	4	47	47	ACCGCCTCCACGAGGCTGCCGGC	5	-	6229	6588
ENSDARG00000008398	ENSDART00000016938	4	47	47	CCCTGCCACGGCCAGAGCCTTTGAG	7	-	5907	6588
ENSDARG00000008398	ENSDART00000016938	4	47	47	CCCTCCCGCTGTGGTTGCCGTTGCT	7	-	6133	6588
ENSDARG00000008398	ENSDART00000016938	4	47	47	GTTCACAGACGGCATGCTGCTGTT	6	-	6088	6588
ENSDARG00000008398	ENSDART00000016938	4	47	47	CGCTGCGCCCTCCCGCTGTGGTTGC	7	-	6140	6588
ENSDARG00000008398	ENSDART00000016938	4	47	47	CGCTGCGCCCTCCCGCTGTGGTT	5	-	6142	6588
ENSDARG00000008398	ENSDART00000016938	4	47	47	CGCCTCCACGAGGCTGCCGGCGCT	6	-	6226	6588
ENSDARG00000008398	ENSDART00000016938	4	48	48	CTCATCCTCCATCAGAGGGCTGT	5	-	6551	6588
ENSDARG00000008398	ENSDART00000016938	4	48	48	CCCATCAGAGCCTGTGGCGGGAGAA	7	-	6480	6588
ENSDARG00000008398	ENSDART00000016938	4	48	48	TGCCCCATCAGAGCCTGTGGCGGGA	7	-	6483	6588
ENSDARG00000008398	ENSDART00000016938	4	48	48	TGCCCCATCAGAGCCTGTGGCGGG	6	-	6484	6588
ENSDARG00000008398	ENSDART00000016938	4	48	48	TCCTCATCCTCCATCAGAGGGCTGT	7	-	6551	6588
ENSDARG00000008398	ENSDART00000028856	4	2	2	CTCGTCCTCATTCAGACTGGGGA	5	-	101	6504
ENSDARG00000008398	ENSDART00000028856	4	2	2	GCCAACGACGGACTGGAATAGTTG	6	-	72	6504
ENSDARG00000008398	ENSDART00000028856	4	5	5	ACCACCATCCCCTTTAGTGGCCTGC	7	-	678	6504
ENSDARG00000008398	ENSDART00000028856	4	9	9	AGCTGCTGCTTCTCACGGAGCTTCT	7	-	1313	6504
ENSDARG00000008398	ENSDART00000028856	4	11	11	GTACTAACCTGAATTTGGATTTGGA	7	-	1540	6504
ENSDARG00000008398	ENSDART00000028856	4	12	12	ATCACCAGCCAGTAGAAGACGTT	5	-	1618	6504
ENSDARG00000008398	ENSDART00000028856	4	12	12	AAAATCACCAGCCAGTAGAAGAC	5	-	1621	6504
ENSDARG00000008398	ENSDART00000028856	4	12	12	AGCCACTCCGGCTGCTGGTGATGCT	7	-	1679	6504
ENSDARG00000008398	ENSDART00000028856	4	13	13	AGAGCCAGCAGCACCTTATTGGCT	6	-	1722	6504
ENSDARG00000008398	ENSDART00000028856	4	15	15	GTTTCCACAGATGAAGAGGATGAT	6	-	2242	6504
ENSDARG00000008398	ENSDART00000028856	4	15	15	TTCCACAGATGAAGAGGATGATGAA	7	-	2239	6504
ENSDARG00000008398	ENSDART00000028856	4	16	16	CTCCTCTTCCTCTTTCTGCGCTGAT	7	-	2331	6504
ENSDARG00000008398	ENSDART00000028856	4	16	16	CTCTTCCTCTTTCTGCGCTGATGTT	7	-	2328	6504
ENSDARG00000008398	ENSDART00000028856	4	17	17	TTCATCCTCTAGGGGTGGTTTCT	5	-	2414	6504
ENSDARG00000008398	ENSDART00000028856	4	17	17	CTCTCCATCTGAAGTGATGGATTT	6	-	2461	6504
ENSDARG00000008398	ENSDART00000028856	4	17	17	GTTGGCGTCTCTCCATCTGAAGTG	6	-	2469	6504
ENSDARG00000008398	ENSDART00000028856	4	24	24	TGCAGCAAAGAGGTGACGATGAC	5	-	3142	6504
ENSDARG00000008398	ENSDART00000028856	4	24	24	AACTGCAGCAAAGAGGTGACGAT	5	-	3145	6504
ENSDARG00000008398	ENSDART00000028856	4	25	25	GCACTCAGCCTGCGTCTGTTTAG	5	-	3230	6504
ENSDARG00000008398	ENSDART00000028856	4	25	25	GCCTGCGTCTGTTTAGAAGTGTCT	6	-	3222	6504
ENSDARG00000008398	ENSDART00000028856	4	27	27	GGCCCAACATCCTCTGCATGGGAG	6	-	3423	6504
ENSDARG00000008398	ENSDART00000028856	4	27	27	ATCCTCTGCATGGGAGTCGATGGC	6	-	3415	6504
ENSDARG00000008398	ENSDART00000028856	4	27	27	AACATCCTCTGCATGGGAGTCGAT	6	-	3418	6504
ENSDARG00000008398	ENSDART00000028856	4	28	28	GTTCACCACGTACCAGACTTTGTA	6	-	3673	6504
ENSDARG00000008398	ENSDART00000028856	4	31	31	TACCACAGAGGAGGGGGGAGAGGAG	7	-	3972	6504
ENSDARG00000008398	ENSDART00000028856	4	32	32	GTTATCCTCAGTGTTTTGGAGGC	5	-	4007	6504
ENSDARG00000008398	ENSDART00000028856	4	35	35	AAAAGCTAACAAAGTAGAAGATGGC	7	-	4414	6504
ENSDARG00000008398	ENSDART00000028856	4	35	35	GACCCCTTCTCACAAGGGCGGTTTG	7	-	4349	6504
ENSDARG00000008398	ENSDART00000028856	4	36	36	GAACTCATCTAGATGATGCGGTC	5	-	4529	6504
ENSDARG00000008398	ENSDART00000028856	4	37	37	TCCAAATCCAAGAGGTGGCTGAA	5	-	4631	6504
ENSDARG00000008398	ENSDART00000028856	4	37	37	TTCCAAATCCAAGAGGTGGCTGAA	6	-	4631	6504
ENSDARG00000008398	ENSDART00000028856	4	38	38	CACACCTTCGGTTTTGATGCGTAG	6	-	4768	6504
ENSDARG00000008398	ENSDART00000028856	4	38	38	TTACACACCTTCGGTTTTGATGCG	6	-	4771	6504
ENSDARG00000008398	ENSDART00000028856	4	42	42	GAAAGCACCATGTGGGTCGTGGCA	6	-	5459	6504
ENSDARG00000008398	ENSDART00000028856	4	42	42	ACCAGCTTCTGATGAGAGGGAGAT	6	-	5283	6504
ENSDARG00000008398	ENSDART00000028856	4	46	46	TACCGCCTCCACGAGGCTGCCGGC	6	-	6145	6504
ENSDARG00000008398	ENSDART00000028856	4	46	46	ACAGACGGCATGCTGCTGTTGAG	5	-	6001	6504
ENSDARG00000008398	ENSDART00000028856	4	46	46	TGCGCCCTCCCGCTGTGGTTGCC	5	-	6055	6504
ENSDARG00000008398	ENSDART00000028856	4	46	46	GTTCACAGACGGCATGCTGCTGTT	6	-	6004	6504
ENSDARG00000008398	ENSDART00000028856	4	46	46	ACAGACGGCATGCTGCTGTTGAGCT	7	-	5999	6504
ENSDARG00000008398	ENSDART00000028856	4	46	46	CGCTGCGCCCTCCCGCTGTGGTTGC	7	-	6056	6504
ENSDARG00000008398	ENSDART00000028856	4	46	46	CGCTGCGCCCTCCCGCTGTGGTT	5	-	6058	6504
ENSDARG00000008398	ENSDART00000028856	4	46	46	ACCGCCTCCACGAGGCTGCCGGC	5	-	6145	6504
ENSDARG00000008398	ENSDART00000028856	4	46	46	CGCCTCCACGAGGCTGCCGGCGCT	6	-	6142	6504
ENSDARG00000008398	ENSDART00000028856	4	46	46	CCCTCCCGCTGTGGTTGCCGTTGCT	7	-	6049	6504
ENSDARG00000008398	ENSDART00000028856	4	46	46	CCCTGCCACGGCCAGAGCCTTTGAG	7	-	5823	6504
ENSDARG00000008398	ENSDART00000028856	4	47	47	CCCATCAGAGCCTGTGGCGGGAGAA	7	-	6396	6504
ENSDARG00000008398	ENSDART00000028856	4	47	47	TGCCCCATCAGAGCCTGTGGCGGGA	7	-	6399	6504
ENSDARG00000008398	ENSDART00000028856	4	47	47	TGCCCCATCAGAGCCTGTGGCGGG	6	-	6400	6504
ENSDARG00000008398	ENSDART00000028856	4	47	47	TCCTCATCCTCCATCAGAGGGCTGT	7	-	6467	6504
ENSDARG00000008398	ENSDART00000028856	4	47	47	CTCATCCTCCATCAGAGGGCTGT	5	-	6467	6504
ENSDARG00000008398	ENSDART00000100114	4	1	1	ATCCTCTGCATGGGAGTCGATGGC	6	-	22	2352
ENSDARG00000008398	ENSDART00000100114	4	1	1	AACATCCTCTGCATGGGAGTCGAT	6	-	25	2352
ENSDARG00000008398	ENSDART00000100114	4	1	1	GGCCCAACATCCTCTGCATGGGAG	6	-	30	2352
ENSDARG00000008398	ENSDART00000100114	4	2	2	GTTCACCACGTACCAGACTTTGTA	6	-	280	2352
ENSDARG00000008398	ENSDART00000100114	4	6	6	GTTATCCTCAGTGTTTTGGAGGC	5	-	641	2352
ENSDARG00000008398	ENSDART00000100114	4	9	9	GACCCCTTCTCACAAGGGCGGTTTG	7	-	983	2352
ENSDARG00000008398	ENSDART00000100114	4	9	9	AAAAGCTAACAAAGTAGAAGATGGC	7	-	1048	2352
ENSDARG00000008398	ENSDART00000100114	4	10	10	GAACTCATCTAGATGATGCGGTC	5	-	1163	2352
ENSDARG00000008398	ENSDART00000100114	4	11	11	TCCAAATCCAAGAGGTGGCTGAA	5	-	1265	2352
ENSDARG00000008398	ENSDART00000100114	4	13	13	CACACCTTCGGTTTTGATGCGTAG	6	-	1396	2352
ENSDARG00000008398	ENSDART00000100114	4	13	13	TTACACACCTTCGGTTTTGATGCG	6	-	1399	2352
ENSDARG00000008398	ENSDART00000100114	4	20	20	TACCGCCTCCACGAGGCTGCCGGC	6	-	2119	2352
ENSDARG00000008398	ENSDART00000100114	4	20	20	GTTCACAGACGGCATGCTGCTGTT	6	-	1978	2352
ENSDARG00000008398	ENSDART00000100114	4	20	20	TGCGCCCTCCCGCTGTGGTTGCC	5	-	2029	2352
ENSDARG00000008398	ENSDART00000100114	4	20	20	CGCTGCGCCCTCCCGCTGTGGTTGC	7	-	2030	2352
ENSDARG00000008398	ENSDART00000100114	4	20	20	CGCTGCGCCCTCCCGCTGTGGTT	5	-	2032	2352
ENSDARG00000008398	ENSDART00000100114	4	20	20	CGCCTCCACGAGGCTGCCGGCGCT	6	-	2116	2352
ENSDARG00000008398	ENSDART00000100114	4	20	20	CCCTCCCGCTGTGGTTGCCGTTGCT	7	-	2023	2352
ENSDARG00000008398	ENSDART00000100114	4	20	20	ACCGCCTCCACGAGGCTGCCGGC	5	-	2119	2352
ENSDARG00000008398	ENSDART00000100114	4	20	20	ACAGACGGCATGCTGCTGTTGAGCT	7	-	1973	2352
ENSDARG00000008398	ENSDART00000100114	4	20	20	ACAGACGGCATGCTGCTGTTGAG	5	-	1975	2352
ENSDARG00000008398	ENSDART00000100116	4	2	2	ACCACCATCCCCTTTAGTGGCCTGC	7	-	171	5715
ENSDARG00000008398	ENSDART00000100116	4	6	6	AGCTGCTGCTTCTCACGGAGCTTCT	7	-	794	5715
ENSDARG00000008398	ENSDART00000100116	4	10	10	GTACTAACCTGAATTTGGATTTGGA	7	-	1093	5715
ENSDARG00000008398	ENSDART00000100116	4	11	11	AAAATCACCAGCCAGTAGAAGAC	5	-	1174	5715
ENSDARG00000008398	ENSDART00000100116	4	11	11	ATCACCAGCCAGTAGAAGACGTT	5	-	1171	5715
ENSDARG00000008398	ENSDART00000100116	4	11	11	AGCCACTCCGGCTGCTGGTGATGCT	7	-	1232	5715
ENSDARG00000008398	ENSDART00000100116	4	12	12	AGAGCCAGCAGCACCTTATTGGCT	6	-	1275	5715
ENSDARG00000008398	ENSDART00000100116	4	14	14	GTTTCCACAGATGAAGAGGATGAT	6	-	1795	5715
ENSDARG00000008398	ENSDART00000100116	4	14	14	TTCCACAGATGAAGAGGATGATGAA	7	-	1792	5715
ENSDARG00000008398	ENSDART00000100116	4	15	15	CTCTTCCTCTTTCTGCGCTGATGTT	7	-	1881	5715
ENSDARG00000008398	ENSDART00000100116	4	15	15	CTCCTCTTCCTCTTTCTGCGCTGAT	7	-	1884	5715
ENSDARG00000008398	ENSDART00000100116	4	22	22	AACTGCAGCAAAGAGGTGACGAT	5	-	2530	5715
ENSDARG00000008398	ENSDART00000100116	4	22	22	TGCAGCAAAGAGGTGACGATGAC	5	-	2527	5715
ENSDARG00000008398	ENSDART00000100116	4	23	23	GCCTGCGTCTGTTTAGAAGTGTCT	6	-	2607	5715
ENSDARG00000008398	ENSDART00000100116	4	23	23	GCACTCAGCCTGCGTCTGTTTAG	5	-	2615	5715
ENSDARG00000008398	ENSDART00000100116	4	25	25	GGCCCAACATCCTCTGCATGGGAG	6	-	2808	5715
ENSDARG00000008398	ENSDART00000100116	4	25	25	AACATCCTCTGCATGGGAGTCGAT	6	-	2803	5715
ENSDARG00000008398	ENSDART00000100116	4	25	25	ATCCTCTGCATGGGAGTCGATGGC	6	-	2800	5715
ENSDARG00000008398	ENSDART00000100116	4	26	26	GTTCACCACGTACCAGACTTTGTA	6	-	3058	5715
ENSDARG00000008398	ENSDART00000100116	4	29	29	GTTATCCTCAGTGTTTTGGAGGC	5	-	3335	5715
ENSDARG00000008398	ENSDART00000100116	4	32	32	AAAAGCTAACAAAGTAGAAGATGGC	7	-	3742	5715
ENSDARG00000008398	ENSDART00000100116	4	32	32	GACCCCTTCTCACAAGGGCGGTTTG	7	-	3677	5715
ENSDARG00000008398	ENSDART00000100116	4	33	33	GAACTCATCTAGATGATGCGGTC	5	-	3857	5715
ENSDARG00000008398	ENSDART00000100116	4	34	34	TCCAAATCCAAGAGGTGGCTGAA	5	-	3959	5715
ENSDARG00000008398	ENSDART00000100116	4	36	36	CACACCTTCGGTTTTGATGCGTAG	6	-	4090	5715
ENSDARG00000008398	ENSDART00000100116	4	36	36	TTACACACCTTCGGTTTTGATGCG	6	-	4093	5715
ENSDARG00000008398	ENSDART00000100116	4	41	41	GAAAGCACCATGTGGGTCGTGGCA	6	-	4763	5715
ENSDARG00000008398	ENSDART00000100116	4	41	41	ACCAGCTTCTGATGAGAGGGAGAT	6	-	4587	5715
ENSDARG00000008398	ENSDART00000100116	4	45	45	ACAGACGGCATGCTGCTGTTGAG	5	-	5338	5715
ENSDARG00000008398	ENSDART00000100116	4	45	45	ACAGACGGCATGCTGCTGTTGAGCT	7	-	5336	5715
ENSDARG00000008398	ENSDART00000100116	4	45	45	TGCGCCCTCCCGCTGTGGTTGCC	5	-	5392	5715
ENSDARG00000008398	ENSDART00000100116	4	45	45	ACCGCCTCCACGAGGCTGCCGGC	5	-	5482	5715
ENSDARG00000008398	ENSDART00000100116	4	45	45	CCCTCCCGCTGTGGTTGCCGTTGCT	7	-	5386	5715
ENSDARG00000008398	ENSDART00000100116	4	45	45	TACCGCCTCCACGAGGCTGCCGGC	6	-	5482	5715
ENSDARG00000008398	ENSDART00000100116	4	45	45	CCCTGCCACGGCCAGAGCCTTTGAG	7	-	5160	5715
ENSDARG00000008398	ENSDART00000100116	4	45	45	CGCCTCCACGAGGCTGCCGGCGCT	6	-	5479	5715
ENSDARG00000008398	ENSDART00000100116	4	45	45	GTTCACAGACGGCATGCTGCTGTT	6	-	5341	5715
ENSDARG00000008398	ENSDART00000100116	4	45	45	CGCTGCGCCCTCCCGCTGTGGTT	5	-	5395	5715
ENSDARG00000008398	ENSDART00000100116	4	45	45	CGCTGCGCCCTCCCGCTGTGGTTGC	7	-	5393	5715
ENSDARG00000008398	ENSDART00000100118	4	1	1	CTCGTCCTCATTCAGACTGGGGA	5	-	47	6537
ENSDARG00000008398	ENSDART00000100118	4	1	1	GCCAACGACGGACTGGAATAGTTG	6	-	18	6537
ENSDARG00000008398	ENSDART00000100118	4	4	4	ACCACCATCCCCTTTAGTGGCCTGC	7	-	624	6537
ENSDARG00000008398	ENSDART00000100118	4	8	8	AGCTGCTGCTTCTCACGGAGCTTCT	7	-	1259	6537
ENSDARG00000008398	ENSDART00000100118	4	10	10	GTACTAACCTGAATTTGGATTTGGA	7	-	1486	6537
ENSDARG00000008398	ENSDART00000100118	4	11	11	AGCCACTCCGGCTGCTGGTGATGCT	7	-	1625	6537
ENSDARG00000008398	ENSDART00000100118	4	11	11	ATCACCAGCCAGTAGAAGACGTT	5	-	1564	6537
ENSDARG00000008398	ENSDART00000100118	4	11	11	AAAATCACCAGCCAGTAGAAGAC	5	-	1567	6537
ENSDARG00000008398	ENSDART00000100118	4	12	12	AGAGCCAGCAGCACCTTATTGGCT	6	-	1668	6537
ENSDARG00000008398	ENSDART00000100118	4	14	14	TTCCACAGATGAAGAGGATGATGAA	7	-	2185	6537
ENSDARG00000008398	ENSDART00000100118	4	14	14	GTTTCCACAGATGAAGAGGATGAT	6	-	2188	6537
ENSDARG00000008398	ENSDART00000100118	4	15	15	CTCTTCCTCTTTCTGCGCTGATGTT	7	-	2274	6537
ENSDARG00000008398	ENSDART00000100118	4	15	15	CTCCTCTTCCTCTTTCTGCGCTGAT	7	-	2277	6537
ENSDARG00000008398	ENSDART00000100118	4	16	16	CTCTCCATCTGAAGTGATGGATTT	6	-	2407	6537
ENSDARG00000008398	ENSDART00000100118	4	16	16	GTTGGCGTCTCTCCATCTGAAGTG	6	-	2415	6537
ENSDARG00000008398	ENSDART00000100118	4	16	16	TTCATCCTCTAGGGGTGGTTTCT	5	-	2360	6537
ENSDARG00000008398	ENSDART00000100118	4	23	23	AACTGCAGCAAAGAGGTGACGAT	5	-	3091	6537
ENSDARG00000008398	ENSDART00000100118	4	23	23	TGCAGCAAAGAGGTGACGATGAC	5	-	3088	6537
ENSDARG00000008398	ENSDART00000100118	4	24	24	GCCTGCGTCTGTTTAGAAGTGTCT	6	-	3168	6537
ENSDARG00000008398	ENSDART00000100118	4	24	24	GCACTCAGCCTGCGTCTGTTTAG	5	-	3176	6537
ENSDARG00000008398	ENSDART00000100118	4	26	26	GGCCCAACATCCTCTGCATGGGAG	6	-	3372	6537
ENSDARG00000008398	ENSDART00000100118	4	26	26	AACATCCTCTGCATGGGAGTCGAT	6	-	3367	6537
ENSDARG00000008398	ENSDART00000100118	4	26	26	ATCCTCTGCATGGGAGTCGATGGC	6	-	3364	6537
ENSDARG00000008398	ENSDART00000100118	4	27	27	GTTCACCACGTACCAGACTTTGTA	6	-	3622	6537
ENSDARG00000008398	ENSDART00000100118	4	31	31	TACCACAGAGGAGGGGGGAGAGGAG	7	-	4005	6537
ENSDARG00000008398	ENSDART00000100118	4	32	32	GTTATCCTCAGTGTTTTGGAGGC	5	-	4046	6537
ENSDARG00000008398	ENSDART00000100118	4	35	35	GACCCCTTCTCACAAGGGCGGTTTG	7	-	4388	6537
ENSDARG00000008398	ENSDART00000100118	4	35	35	AAAAGCTAACAAAGTAGAAGATGGC	7	-	4453	6537
ENSDARG00000008398	ENSDART00000100118	4	36	36	GAACTCATCTAGATGATGCGGTC	5	-	4568	6537
ENSDARG00000008398	ENSDART00000100118	4	37	37	TCCAAATCCAAGAGGTGGCTGAA	5	-	4670	6537
ENSDARG00000008398	ENSDART00000100118	4	39	39	TTACACACCTTCGGTTTTGATGCG	6	-	4804	6537
ENSDARG00000008398	ENSDART00000100118	4	39	39	CACACCTTCGGTTTTGATGCGTAG	6	-	4801	6537
ENSDARG00000008398	ENSDART00000100118	4	43	43	ACCAGCTTCTGATGAGAGGGAGAT	6	-	5316	6537
ENSDARG00000008398	ENSDART00000100118	4	43	43	GAAAGCACCATGTGGGTCGTGGCA	6	-	5492	6537
ENSDARG00000008398	ENSDART00000100118	4	47	47	TACCGCCTCCACGAGGCTGCCGGC	6	-	6178	6537
ENSDARG00000008398	ENSDART00000100118	4	47	47	TGCGCCCTCCCGCTGTGGTTGCC	5	-	6088	6537
ENSDARG00000008398	ENSDART00000100118	4	47	47	GTTCACAGACGGCATGCTGCTGTT	6	-	6037	6537
ENSDARG00000008398	ENSDART00000100118	4	47	47	ACCGCCTCCACGAGGCTGCCGGC	5	-	6178	6537
ENSDARG00000008398	ENSDART00000100118	4	47	47	CCCTCCCGCTGTGGTTGCCGTTGCT	7	-	6082	6537
ENSDARG00000008398	ENSDART00000100118	4	47	47	ACAGACGGCATGCTGCTGTTGAGCT	7	-	6032	6537
ENSDARG00000008398	ENSDART00000100118	4	47	47	CCCTGCCACGGCCAGAGCCTTTGAG	7	-	5856	6537
ENSDARG00000008398	ENSDART00000100118	4	47	47	CGCCTCCACGAGGCTGCCGGCGCT	6	-	6175	6537
ENSDARG00000008398	ENSDART00000100118	4	47	47	CGCTGCGCCCTCCCGCTGTGGTT	5	-	6091	6537
ENSDARG00000008398	ENSDART00000100118	4	47	47	CGCTGCGCCCTCCCGCTGTGGTTGC	7	-	6089	6537
[truncated: 10,414 more rows]
