# Supplementary material for: Rapid Mutation of Endogenous Zebrafish Genes Using Zinc Finger Nucleases Made by Oligomerized Pool ENgineering (OPEN)
Source: PLoS One. 2009 Feb 9;4(2):e4348. doi: 10.1371/journal.pone.0004348 (PMC2634973; doi:10.1371/journal.pone.0004348)
Supplement: Table S5 — Potential OPEN ZFN target sites in gene transcripts encoded on zebrafish chromosome 5. Data presented as described in the legend to Table S1. (3.12 MB XLS) [file pone.0004348.s005.xls]

## Sheet: Chromosome5
Gene ID	Transcript ID	Chromosome Number	Exon Number	Coding Exon Number	TargetSite	ZFN Spacer Length	Strand	ZFN Cleavage Site	Coding Sequence Length
ENSDARG00000001950	ENSDART00000013404	5	3	2	AAATGCTAAGATCGTCTTTGTTGTG	7	+	27	582
ENSDARG00000001950	ENSDART00000013404	5	3	2	CAAAAATGCTAAGATCGTCTTTGTT	7	+	24	582
ENSDARG00000001950	ENSDART00000013404	5	4	3	ACCTGCTGCGCGCGGAGGTGGCG	5	+	131	582
ENSDARG00000001950	ENSDART00000013404	5	4	3	ACCTGCTGCGCGCGGAGGTGGCGTC	7	+	131	582
ENSDARG00000001950	ENSDART00000013404	5	6	5	CGCGGCATCGTCAGGAAGGTGCG	5	+	508	582
ENSDARG00000001950	ENSDART00000013404	5	7	6	TCCTCCAGATAAACTCGGAGCTGCC	7	+	518	582
ENSDARG00000002016	ENSDART00000025368	5	5	5	ACCCCATAACTGGAGAGGTATTT	5	+	236	1464
ENSDARG00000002016	ENSDART00000025368	5	5	5	CACCAACCCCATAACTGGAGAGGTA	7	+	231	1464
ENSDARG00000002016	ENSDART00000025368	5	5	5	ACCAACCCCATAACTGGAGAGGTA	6	+	232	1464
ENSDARG00000002016	ENSDART00000025368	5	7	7	AACAACTCCCACATCGTTGCTAAC	6	+	343	1464
ENSDARG00000002016	ENSDART00000025368	5	7	7	AAACAACTCCCACATCGTTGCTAAC	7	+	342	1464
ENSDARG00000002016	ENSDART00000025368	5	9	9	AAAGTCCTCGACCCCGGTGAGTAC	6	+	547	1464
ENSDARG00000002016	ENSDART00000025368	5	10	10	AAAAGCACAAATCTGGAGACGCG	5	+	604	1464
ENSDARG00000002016	ENSDART00000025368	5	11	11	TCCAGCCACCAACCATGAAGCAGGT	7	+	780	1464
ENSDARG00000002016	ENSDART00000025368	5	14	14	GTCTCACACTGGCCGTGGGATTCT	6	+	957	1464
ENSDARG00000002016	ENSDART00000025368	5	14	14	GTCTCACACTGGCCGTGGGATTC	5	+	957	1464
ENSDARG00000002016	ENSDART00000025368	5	16	16	ACAGACAAACCCAAGGTGCTGAA	5	+	1138	1464
ENSDARG00000002016	ENSDART00000025368	5	18	18	AAAGCCTTCAGACCAGGAGTGGGA	6	+	1330	1464
ENSDARG00000002016	ENSDART00000025368	5	18	18	AAAGCCTTCAGACCAGGAGTGGGAA	7	+	1330	1464
ENSDARG00000002016	ENSDART00000025368	5	19	19	AAAGGCAGAACTGGTTTTGGAGAC	6	+	1438	1464
ENSDARG00000002016	ENSDART00000051663	5	5	5	CACCAACCCCATAACTGGAGAGGTA	7	+	231	1575
ENSDARG00000002016	ENSDART00000051663	5	5	5	ACCCCATAACTGGAGAGGTATTT	5	+	236	1575
ENSDARG00000002016	ENSDART00000051663	5	5	5	ACCAACCCCATAACTGGAGAGGTA	6	+	232	1575
ENSDARG00000002016	ENSDART00000051663	5	7	7	AACAACTCCCACATCGTTGCTAAC	6	+	343	1575
ENSDARG00000002016	ENSDART00000051663	5	7	7	AAACAACTCCCACATCGTTGCTAAC	7	+	342	1575
ENSDARG00000002016	ENSDART00000051663	5	9	9	AAAGTCCTCGACCCCGGTGAGTAC	6	+	547	1575
ENSDARG00000002016	ENSDART00000051663	5	10	10	AAAAGCACAAATCTGGAGACGCG	5	+	604	1575
ENSDARG00000002016	ENSDART00000051663	5	11	11	TCCAGCCACCAACCATGAAGCAGGT	7	+	780	1575
ENSDARG00000002016	ENSDART00000051663	5	14	14	GTTTTCAGATTCAAGGAGGAGAC	5	+	992	1575
ENSDARG00000002016	ENSDART00000051663	5	15	15	GTCTCACACTGGCCGTGGGATTCT	6	+	1086	1575
ENSDARG00000002016	ENSDART00000051663	5	15	15	GTCTCACACTGGCCGTGGGATTC	5	+	1086	1575
ENSDARG00000002016	ENSDART00000051663	5	17	17	ACAGACAAACCCAAGGTGCTGAA	5	+	1267	1575
ENSDARG00000002016	ENSDART00000051663	5	19	19	AAAGCCTTCAGACCAGGAGTGGGA	6	+	1441	1575
ENSDARG00000002016	ENSDART00000051663	5	19	19	AAAGCCTTCAGACCAGGAGTGGGAA	7	+	1441	1575
ENSDARG00000002016	ENSDART00000051663	5	20	20	AAAGGCAGAACTGGTTTTGGAGAC	6	+	1549	1575
ENSDARG00000002184	ENSDART00000006899	5	1	1	TTCACCTGCACCGGGTTGGAGCT	5	-	142	1065
ENSDARG00000002184	ENSDART00000006899	5	1	1	TCCTCCAGCTGCATGATGGCGCG	5	-	172	1065
ENSDARG00000002184	ENSDART00000006899	5	1	1	TCCAGCAAATCCGACAGTTTTGGAG	7	-	68	1065
ENSDARG00000002184	ENSDART00000006899	5	1	1	AGCAAATCCGACAGTTTTGGAGCA	6	-	66	1065
ENSDARG00000002184	ENSDART00000006899	5	1	1	AAATCCGACAGTTTTGGAGCATCT	6	-	63	1065
ENSDARG00000002184	ENSDART00000006899	5	1	1	ACCTGCACCGGGTTGGAGCTGCT	5	-	139	1065
ENSDARG00000002184	ENSDART00000006899	5	2	2	AGATACTTCAGATCTGTAGTAGAG	6	-	255	1065
ENSDARG00000002184	ENSDART00000006899	5	2	2	ACCCACCTCTCAATTTTGGCTTG	5	-	529	1065
ENSDARG00000002184	ENSDART00000006899	5	2	2	GTTCTCGCAGTCTTTGGGCAGCT	5	-	416	1065
ENSDARG00000002184	ENSDART00000006899	5	2	2	CTCTGCTCCTCAGTTGGAGTGTCT	6	-	444	1065
ENSDARG00000002184	ENSDART00000006899	5	2	2	CAACCCACCTCTCAATTTTGGCTTG	7	-	529	1065
ENSDARG00000002184	ENSDART00000006899	5	3	3	TCCATCTGCGCACGTGCAGCAGGT	6	-	641	1065
ENSDARG00000002184	ENSDART00000006899	5	5	5	ATCGTCCACTGTCATGGTGGGAA	5	-	845	1065
ENSDARG00000002184	ENSDART00000006899	5	6	6	CTCTGCATCACCATCTGCTGTGGAT	7	-	921	1065
ENSDARG00000002184	ENSDART00000006899	5	6	6	CTCCTCTGCATCACCATCTGCTGTG	7	-	924	1065
ENSDARG00000002220	ENSDART00000015076	5	2	2	GAAAAAGGCAGCATGGAGTGAGGT	6	+	128	867
ENSDARG00000002220	ENSDART00000015076	5	2	2	AAAGGCAGCATGGAGTGAGGTTGGT	7	+	131	867
ENSDARG00000002220	ENSDART00000015076	5	3	3	AGAAGCTTCCTTTAGAGGCTGAG	5	+	173	867
ENSDARG00000002220	ENSDART00000015076	5	3	3	AGAAGCTTCCTTTAGAGGCTGAGCT	7	+	173	867
ENSDARG00000002220	ENSDART00000015076	5	5	5	ACAAACAGAAGAGATGAAGATGCT	6	+	322	867
ENSDARG00000002220	ENSDART00000015076	5	6	6	CAAAAAGACAGAAGAGATGTTGTC	6	+	480	867
ENSDARG00000002220	ENSDART00000015076	5	7	7	CAAAGCTGCTAGCTGAGCAGAGGAA	7	+	590	867
ENSDARG00000002264	ENSDART00000012268	5	2	1	TACCCAATCTGGAAGGATTTAAC	5	+	188	405
ENSDARG00000002264	ENSDART00000012268	5	2	1	CAAAACTCCAGCAGGGACGGAGGA	6	+	231	405
ENSDARG00000002264	ENSDART00000012268	5	2	1	ACAAAACTCCAGCAGGGACGGAGGA	7	+	230	405
ENSDARG00000002264	ENSDART00000012268	5	2	1	AACTCCAGCAGGGACGGAGGAGCC	6	+	234	405
ENSDARG00000002300	ENSDART00000019461	5	1	1	GACTCCAAAAGTAATGGTGGTGAA	6	+	63	1200
ENSDARG00000002300	ENSDART00000019461	5	1	1	CTCAAAGACTTTTTCCTGGGCTTCT	7	+	28	1200
ENSDARG00000002300	ENSDART00000019461	5	2	2	TACGTCAGACCATCTGAGGTGGTC	6	+	268	1200
ENSDARG00000002300	ENSDART00000019461	5	2	2	GAATACGTCAGACCATCTGAGGTG	6	+	265	1200
ENSDARG00000002300	ENSDART00000019461	5	5	5	GTCAAAAAACAGGACGGTGTATAC	6	+	434	1200
ENSDARG00000002300	ENSDART00000019461	5	7	7	TTAAACCCAACAAGCCGAAGAAGTT	7	+	620	1200
ENSDARG00000002300	ENSDART00000019461	5	7	7	CAACAAGCCGAAGAAGTTGTTGCG	6	+	627	1200
ENSDARG00000002300	ENSDART00000019461	5	7	7	AACCCAACAAGCCGAAGAAGTTGTT	7	+	623	1200
ENSDARG00000002300	ENSDART00000019461	5	7	7	AAACCCAACAAGCCGAAGAAGTT	5	+	622	1200
ENSDARG00000002300	ENSDART00000019461	5	8	8	AAAACCTGCCCAGTTCTGGATAC	5	+	851	1200
ENSDARG00000002300	ENSDART00000019461	5	11	11	TTCATCGACAAGAACGAAGTCTTC	6	+	1072	1200
ENSDARG00000002300	ENSDART00000019461	5	12	12	CACTCAGACCTGTCAGATGGCGTA	6	+	1180	1200
ENSDARG00000002355	ENSDART00000020044	5	1	1	GTCACCTACATGTGTGTGTGTGC	5	-	140	1410
ENSDARG00000002355	ENSDART00000020044	5	2	2	CACAACACAATGCCATGCATTTGTC	7	-	257	1410
ENSDARG00000002355	ENSDART00000020044	5	4	4	GAAACCACATAGTCTTGAATGGTTC	7	-	512	1410
ENSDARG00000002355	ENSDART00000020044	5	4	4	GTAGCCCCAGCTGGCAGCATTTTGT	7	-	573	1410
ENSDARG00000002355	ENSDART00000020044	5	4	4	AGCCCCAGCTGGCAGCATTTTGT	5	-	573	1410
ENSDARG00000002355	ENSDART00000020044	5	5	5	TGCCGCCCCGACCGCTGTGTGAGCA	7	-	729	1410
ENSDARG00000002355	ENSDART00000020044	5	6	6	GTTGCCTCCATTAAGTGATGCGGCC	7	-	936	1410
ENSDARG00000002355	ENSDART00000020044	5	7	7	CACGCCAGCGGCCCGCAGGCTCT	5	-	1235	1410
ENSDARG00000002369	ENSDART00000035235	5	2	2	AGCACCAGATGCAAGGTGGACTCT	6	-	468	1872
ENSDARG00000002369	ENSDART00000035235	5	2	2	AGCACCAGATGCAAGGTGGACTCT	6	-	240	1872
ENSDARG00000002369	ENSDART00000035235	5	2	2	AGCACCAGATGCAATGTGGACTCT	6	-	696	1872
ENSDARG00000002369	ENSDART00000035235	5	2	2	CTCTACCTCGAGGGTGATGGTTTT	6	-	82	1872
ENSDARG00000002369	ENSDART00000035235	5	2	2	GCATGCCTCCCCTAAGACGCAGCA	6	-	716	1872
ENSDARG00000002369	ENSDART00000035235	5	2	2	GCATGCCTCCCCTGAGACGCAGCA	6	-	1628	1872
ENSDARG00000002369	ENSDART00000035235	5	2	2	GCATGCCTCCCCTGAGACGCAGCA	6	-	1172	1872
ENSDARG00000002369	ENSDART00000035235	5	2	2	GCATGCCTCCTCTAAGACGCAGCA	6	-	944	1872
ENSDARG00000002369	ENSDART00000035235	5	2	2	GCATGCCTCCTCTAAGACGCAGCA	6	-	488	1872
ENSDARG00000002369	ENSDART00000035235	5	2	2	GCATGCCTCCTCTAAGACGCAGCA	6	-	260	1872
ENSDARG00000002369	ENSDART00000035235	5	2	2	AGCACCAGATGCAAGGTGGACTCT	6	-	924	1872
ENSDARG00000002369	ENSDART00000035235	5	2	2	AGCACCAGATGCAAGGTGGACTCT	6	-	1152	1872
ENSDARG00000002369	ENSDART00000035235	5	2	2	AACACCAGATGCAAGGTGGACTCT	6	-	1380	1872
ENSDARG00000002369	ENSDART00000035235	5	2	2	AACCTCTGCTGGTCAGGGGGAATGC	7	-	1751	1872
ENSDARG00000002369	ENSDART00000035235	5	2	2	AACCTCTGCTGGTCAGGGGGAATGC	7	-	1523	1872
ENSDARG00000002369	ENSDART00000035235	5	2	2	AACCTCTGCTGGTCAGGGGGAATGC	7	-	1295	1872
ENSDARG00000002369	ENSDART00000035235	5	2	2	AACCTCTGCTGGTCAGGGGGAATGC	7	-	1067	1872
ENSDARG00000002369	ENSDART00000035235	5	2	2	AACCTCTGCTGGTCAGGGGGAATGC	7	-	839	1872
ENSDARG00000002369	ENSDART00000035235	5	2	2	AACCTCTGCTGGTCAGGGGGAATGC	7	-	611	1872
ENSDARG00000002369	ENSDART00000035235	5	2	2	AACCTCTGCTGGTCAGGGGGAATGC	7	-	383	1872
ENSDARG00000002369	ENSDART00000035235	5	2	2	AACCTCTGCTGGTCAGGGGGAATGC	7	-	155	1872
ENSDARG00000002369	ENSDART00000035235	5	2	2	AGCACCAGATGCAAGGTGGACTCT	6	-	1608	1872
ENSDARG00000002405	ENSDART00000006201	5	1	1	ACCAACCGCATAACCGATGGTGGC	6	-	46	1605
ENSDARG00000002405	ENSDART00000006201	5	5	5	GTTTACTCCAGTTTGGCATGAGAA	6	-	695	1605
ENSDARG00000002405	ENSDART00000006201	5	5	5	CTCACCTGCACTTCCAGCAGTTTAC	7	-	713	1605
ENSDARG00000002405	ENSDART00000006201	5	7	7	GCCGGCCACAATGCTTGTGGCTGAA	7	-	864	1605
ENSDARG00000002405	ENSDART00000006201	5	9	9	GCCAAAACCATCCATGATGAAGGT	6	-	1099	1605
ENSDARG00000002405	ENSDART00000006201	5	9	9	TGCCAAAACCATCCATGATGAAGGT	7	-	1099	1605
ENSDARG00000002405	ENSDART00000006201	5	10	10	AGAGACACCACAGCTGTGTAGTG	5	-	1246	1605
ENSDARG00000002405	ENSDART00000006201	5	12	12	GCCCACAGCGGGTACGTGTAGGAC	6	-	1467	1605
ENSDARG00000002405	ENSDART00000032942	5	1	1	ACCAACCGCATAACCGATGGTGGC	6	-	76	1647
ENSDARG00000002405	ENSDART00000032942	5	5	5	CTCACCTGCACTTCCAGCAGTTTAC	7	-	743	1647
ENSDARG00000002405	ENSDART00000032942	5	5	5	GTTTACTCCAGTTTGGCATGAGAA	6	-	725	1647
ENSDARG00000002405	ENSDART00000032942	5	7	7	GCCGGCCACAATGCTTGTGGCTGAA	7	-	894	1647
ENSDARG00000002405	ENSDART00000032942	5	9	9	GCCAAAACCATCCATGATGAAGGT	6	-	1129	1647
ENSDARG00000002405	ENSDART00000032942	5	9	9	TGCCAAAACCATCCATGATGAAGGT	7	-	1129	1647
ENSDARG00000002405	ENSDART00000032942	5	10	10	AGAGACACCACAGCTGTGTAGTG	5	-	1276	1647
ENSDARG00000002405	ENSDART00000032942	5	12	12	GCCCACAGCGGGTACGTGTAGGAC	6	-	1497	1647
ENSDARG00000002405	ENSDART00000098682	5	1	1	GGCTTCAGCTCTGTCTGTTGTCGTC	7	-	108	1836
ENSDARG00000002405	ENSDART00000098682	5	1	1	ACCAACCGCATAACCGATGGTGGC	6	-	208	1836
ENSDARG00000002405	ENSDART00000098682	5	5	5	GTTTACTCCAGTTTGGCATGAGAA	6	-	857	1836
ENSDARG00000002405	ENSDART00000098682	5	5	5	CTCACCTGCACTTCCAGCAGTTTAC	7	-	875	1836
ENSDARG00000002405	ENSDART00000098682	5	7	7	GCCGGCCACAATGCTTGTGGCTGAA	7	-	1026	1836
ENSDARG00000002405	ENSDART00000098682	5	9	9	GCCAAAACCATCCATGATGAAGGT	6	-	1297	1836
ENSDARG00000002405	ENSDART00000098682	5	9	9	TGCCAAAACCATCCATGATGAAGGT	7	-	1297	1836
ENSDARG00000002405	ENSDART00000098682	5	10	10	AGAGACACCACAGCTGTGTAGTG	5	-	1444	1836
ENSDARG00000002405	ENSDART00000098682	5	12	12	GCCCACAGCGGGTACGTGTAGGAC	6	-	1665	1836
ENSDARG00000002479	ENSDART00000015401	5	3	3	TACCTCAGCTCGGTGCAGGAGGA	5	+	1165	4353
ENSDARG00000002479	ENSDART00000015401	5	3	3	GACTACGTCATTCTAGACGAGGCT	6	+	703	4353
ENSDARG00000002479	ENSDART00000015401	5	3	3	GACGACTACCAGGTCGCCGTTGGC	6	+	1233	4353
ENSDARG00000002479	ENSDART00000015401	5	3	3	GACATCATCAAACCGTATTTTCT	5	+	991	4353
ENSDARG00000002479	ENSDART00000015401	5	3	3	GAATCCAACGTAAGGGAGGAGTC	5	+	605	4353
ENSDARG00000002479	ENSDART00000015401	5	3	3	ATCGGCAGAAGGGGAAGGAGGCTGC	7	+	98	4353
ENSDARG00000002479	ENSDART00000015401	5	3	3	CTCCTCACCACTCAGGTGGGTGGTG	7	+	1651	4353
ENSDARG00000002479	ENSDART00000015401	5	3	3	CTCCTCACCACTCAGGTGGGTGGT	6	+	1651	4353
ENSDARG00000002479	ENSDART00000015401	5	3	3	CACGGCTCCAGCAAGACTGAGCG	5	+	565	4353
ENSDARG00000002479	ENSDART00000015401	5	3	3	CTCCCAGTCAAGGAAGATGCTGGA	6	+	1500	4353
ENSDARG00000002479	ENSDART00000015401	5	3	3	TCCAAATGCTAGAGAAGGCGTAGAG	7	+	1098	4353
ENSDARG00000002479	ENSDART00000015401	5	3	3	ACCATCAGAAAGAGGGAGTAGCG	5	+	329	4353
ENSDARG00000002479	ENSDART00000015401	5	3	3	TCCTCACCACTCAGGTGGGTGGTGT	7	+	1652	4353
ENSDARG00000002479	ENSDART00000015401	5	3	3	TCCTCACCACTCAGGTGGGTGGTG	6	+	1652	4353
ENSDARG00000002479	ENSDART00000015401	5	3	3	TCCTCACCACTCAGGTGGGTGGT	5	+	1652	4353
ENSDARG00000002479	ENSDART00000015401	5	3	3	AAAAACTAAAGCTTGAAGAAGGC	5	+	1043	4353
ENSDARG00000002479	ENSDART00000015401	5	3	3	ACATACCTCAGCTCGGTGCAGGA	5	+	1162	4353
ENSDARG00000002479	ENSDART00000015401	5	4	4	CTCCTAAAACAGTCCCTGTGGAAAC	7	+	4133	4353
ENSDARG00000002479	ENSDART00000015401	5	4	4	TTCTTCTACACCCAAAGCTGTTTTG	7	+	3459	4353
ENSDARG00000002479	ENSDART00000015401	5	4	4	TTCTACTCCGAATGAATCTGTGGAT	7	+	3297	4353
ENSDARG00000002479	ENSDART00000015401	5	4	4	TTCTACACCCAAAGCTGTTTTGGTT	7	+	3462	4353
ENSDARG00000002479	ENSDART00000015401	5	4	4	CTCGCCTCCACAGCATGGAGATGTT	7	+	2036	4353
ENSDARG00000002479	ENSDART00000015401	5	4	4	CTCTTCCTCCACTCAGCAGCAGCT	6	+	1956	4353
ENSDARG00000002479	ENSDART00000015401	5	4	4	TTCTACACCCAAAGCTGTTTTGGT	6	+	3462	4353
ENSDARG00000002479	ENSDART00000015401	5	4	4	GAAGACGACCCAGAGGATGCAGAG	6	+	2110	4353
ENSDARG00000002479	ENSDART00000015401	5	4	4	TTCACCAAAGAGCCAGCAGCTGAC	6	+	2086	4353
ENSDARG00000002479	ENSDART00000015401	5	4	4	GTTATCAGCAGCGAAGTGGAAGTT	6	+	2464	4353
ENSDARG00000002479	ENSDART00000015401	5	4	4	CTCCACAAACACCGCTGCTGAAGCT	7	+	4176	4353
ENSDARG00000002479	ENSDART00000015401	5	4	4	CTACACCCAAAGCTGTTTTGGTT	5	+	3464	4353
ENSDARG00000002479	ENSDART00000015401	5	4	4	ACCCAAATCTCCTCAATCTGGAGGG	7	+	2715	4353
ENSDARG00000002479	ENSDART00000015401	5	4	4	ACCCAAAGCTGTTTTGGTTGATGGT	7	+	3468	4353
ENSDARG00000002479	ENSDART00000015401	5	4	4	ACAAACACCGCTGCTGAAGCTTCT	6	+	4180	4353
ENSDARG00000002479	ENSDART00000015401	5	4	4	ACAAACAAAACAATGGGGAGTTTGT	7	+	3221	4353
ENSDARG00000002479	ENSDART00000015401	5	4	4	ACAAACAAAACAATGGGGAGTTT	5	+	3221	4353
ENSDARG00000002479	ENSDART00000015401	5	4	4	AACTCATTCTGAAGAATTTGCAGAG	7	+	3786	4353
ENSDARG00000002479	ENSDART00000015401	5	4	4	AACCTCCCATCAGCTGAGGATGCA	6	+	2380	4353
ENSDARG00000002479	ENSDART00000015401	5	4	4	AACAAAACAATGGGGAGTTTGTC	5	+	3224	4353
ENSDARG00000002479	ENSDART00000015401	5	4	4	AAACAAAACAATGGGGAGTTTGTC	6	+	3223	4353
ENSDARG00000002479	ENSDART00000015401	5	4	4	AAACAAAACAATGGGGAGTTTGT	5	+	3223	4353
ENSDARG00000002479	ENSDART00000015401	5	4	4	AGAACCTCCCATCAGCTGAGGAT	5	+	2378	4353
ENSDARG00000002479	ENSDART00000015401	5	4	4	AGAGCCAGCAGCTGACGAAGACGAC	7	+	2094	4353
ENSDARG00000002479	ENSDART00000015401	5	4	4	CGCCTCCACAGCATGGAGATGTT	5	+	2038	4353
ENSDARG00000002479	ENSDART00000015401	5	4	4	CCCAAAACACTGAACCTGCTTGGCT	7	+	2225	4353
ENSDARG00000002479	ENSDART00000015401	5	4	4	CACCGCTGCTGAAGCTTCTGACAAC	7	+	4185	4353
ENSDARG00000002479	ENSDART00000015401	5	4	4	CACCAAAGAGCCAGCAGCTGACGAA	7	+	2088	4353
ENSDARG00000002479	ENSDART00000015401	5	4	4	CACAAACACCGCTGCTGAAGCTTCT	7	+	4179	4353
ENSDARG00000002479	ENSDART00000015401	5	4	4	CAAATCTCCTCAATCTGGAGGGGAA	7	+	2718	4353
ENSDARG00000002479	ENSDART00000015401	5	4	4	ATCAGCAGCGAAGTGGAAGTTGTT	6	+	2467	4353
ENSDARG00000002479	ENSDART00000015401	5	4	4	AGCTCCACAAACACCGCTGCTGAA	6	+	4174	4353
ENSDARG00000002479	ENSDART00000015401	5	4	4	AGCTCAAGAGCTCATGCAGGCGGA	6	+	2166	4353
ENSDARG00000002479	ENSDART00000015401	5	4	4	AGCCACAACAGATGAGCCTTTTAA	6	+	3015	4353
ENSDARG00000002479	ENSDART00000051544	5	1	1	GACGACTACCAGGTCGCCGTTGGC	6	+	1158	3654
ENSDARG00000002479	ENSDART00000051544	5	1	1	GACATCATCAAACCGTATTTTCT	5	+	916	3654
ENSDARG00000002479	ENSDART00000051544	5	1	1	GAATCCAACGTAAGGGAGGAGTC	5	+	530	3654
ENSDARG00000002479	ENSDART00000051544	5	1	1	ATCGGCAGAAGGGGAAGGAGGCTGC	7	+	23	3654
ENSDARG00000002479	ENSDART00000051544	5	1	1	CACGGCTCCAGCAAGACTGAGCG	5	+	490	3654
ENSDARG00000002479	ENSDART00000051544	5	1	1	CTCCTCACCACTCAGGTGGGTGGTG	7	+	1576	3654
ENSDARG00000002479	ENSDART00000051544	5	1	1	CTCCCAGTCAAGGAAGATGCTGGA	6	+	1425	3654
ENSDARG00000002479	ENSDART00000051544	5	1	1	CTCCTCACCACTCAGGTGGGTGGT	6	+	1576	3654
ENSDARG00000002479	ENSDART00000051544	5	1	1	GACTACGTCATTCTAGACGAGGCT	6	+	628	3654
ENSDARG00000002479	ENSDART00000051544	5	1	1	AAAAACTAAAGCTTGAAGAAGGC	5	+	968	3654
ENSDARG00000002479	ENSDART00000051544	5	1	1	TCCTCACCACTCAGGTGGGTGGT	5	+	1577	3654
ENSDARG00000002479	ENSDART00000051544	5	1	1	TCCAAATGCTAGAGAAGGCGTAGAG	7	+	1023	3654
ENSDARG00000002479	ENSDART00000051544	5	1	1	TACCTCAGCTCGGTGCAGGAGGA	5	+	1090	3654
ENSDARG00000002479	ENSDART00000051544	5	1	1	TCCTCACCACTCAGGTGGGTGGTGT	7	+	1577	3654
ENSDARG00000002479	ENSDART00000051544	5	1	1	ACATACCTCAGCTCGGTGCAGGA	5	+	1087	3654
ENSDARG00000002479	ENSDART00000051544	5	1	1	ACCATCAGAAAGAGGGAGTAGCG	5	+	254	3654
ENSDARG00000002479	ENSDART00000051544	5	1	1	TCCTCACCACTCAGGTGGGTGGTG	6	+	1577	3654
ENSDARG00000002479	ENSDART00000051544	5	2	2	TTCACCAAAGAGCCAGCAGCTGAC	6	+	2011	3654
ENSDARG00000002479	ENSDART00000051544	5	2	2	CTCGCCTCCACAGCATGGAGATGTT	7	+	1961	3654
ENSDARG00000002479	ENSDART00000051544	5	2	2	CGCCTCCACAGCATGGAGATGTT	5	+	1963	3654
ENSDARG00000002479	ENSDART00000051544	5	2	2	CCCAAAACACTGAACCTGCTTGGCT	7	+	2150	3654
ENSDARG00000002479	ENSDART00000051544	5	2	2	CACCAAAGAGCCAGCAGCTGACGAA	7	+	2013	3654
ENSDARG00000002479	ENSDART00000051544	5	2	2	GAAGACGACCCAGAGGATGCAGAG	6	+	2035	3654
ENSDARG00000002479	ENSDART00000051544	5	2	2	CTCTTCCTCCACTCAGCAGCAGCT	6	+	1881	3654
ENSDARG00000002479	ENSDART00000051544	5	2	2	AGCTCAAGAGCTCATGCAGGCGGA	6	+	2091	3654
ENSDARG00000002479	ENSDART00000051544	5	2	2	AGAGCCAGCAGCTGACGAAGACGAC	7	+	2019	3654
ENSDARG00000002479	ENSDART00000051544	5	3	3	CAAATCTCCTCAATCTGGAGGGGAA	7	+	2517	3654
ENSDARG00000002479	ENSDART00000051544	5	3	3	GTTATCAGCAGCGAAGTGGAAGTT	6	+	2263	3654
ENSDARG00000002479	ENSDART00000051544	5	3	3	ACCCAAATCTCCTCAATCTGGAGGG	7	+	2514	3654
ENSDARG00000002479	ENSDART00000051544	5	3	3	AGCCACAACAGATGAGCCTTTTAA	6	+	2814	3654
ENSDARG00000002479	ENSDART00000051544	5	3	3	ATCAGCAGCGAAGTGGAAGTTGTT	6	+	2266	3654
ENSDARG00000002479	ENSDART00000051544	5	4	4	AACAAAACAATGGGGAGTTTGTC	5	+	2936	3654
ENSDARG00000002479	ENSDART00000051544	5	4	4	AAACAAAACAATGGGGAGTTTGTC	6	+	2935	3654
ENSDARG00000002479	ENSDART00000051544	5	4	4	TTCTACACCCAAAGCTGTTTTGGT	6	+	3174	3654
ENSDARG00000002479	ENSDART00000051544	5	4	4	TTCTACACCCAAAGCTGTTTTGGTT	7	+	3174	3654
ENSDARG00000002479	ENSDART00000051544	5	4	4	TTCTACTCCGAATGAATCTGTGGAT	7	+	3009	3654
ENSDARG00000002479	ENSDART00000051544	5	4	4	TTCTTCTACACCCAAAGCTGTTTTG	7	+	3171	3654
ENSDARG00000002479	ENSDART00000051544	5	4	4	ACAAACAAAACAATGGGGAGTTT	5	+	2933	3654
ENSDARG00000002479	ENSDART00000051544	5	4	4	ACAAACAAAACAATGGGGAGTTTGT	7	+	2933	3654
ENSDARG00000002479	ENSDART00000051544	5	4	4	ACCCAAAGCTGTTTTGGTTGATGGT	7	+	3180	3654
ENSDARG00000002479	ENSDART00000051544	5	4	4	AAACAAAACAATGGGGAGTTTGT	5	+	2935	3654
ENSDARG00000002479	ENSDART00000051544	5	4	4	CTACACCCAAAGCTGTTTTGGTT	5	+	3176	3654
ENSDARG00000002479	ENSDART00000051544	5	6	6	ACAAACACCGCTGCTGAAGCTTCT	6	+	3481	3654
ENSDARG00000002479	ENSDART00000051544	5	6	6	CACCGCTGCTGAAGCTTCTGACAAC	7	+	3486	3654
ENSDARG00000002479	ENSDART00000051544	5	6	6	CACAAACACCGCTGCTGAAGCTTCT	7	+	3480	3654
ENSDARG00000002479	ENSDART00000051544	5	6	6	AGCTCCACAAACACCGCTGCTGAA	6	+	3475	3654
ENSDARG00000002479	ENSDART00000051544	5	6	6	CTCCACAAACACCGCTGCTGAAGCT	7	+	3477	3654
ENSDARG00000002479	ENSDART00000051545	5	1	1	TCCTCACCACTCAGGTGGGTGGTG	6	+	1589	3621
ENSDARG00000002479	ENSDART00000051545	5	1	1	GAATCCAACGTAAGGGAGGAGTC	5	+	542	3621
ENSDARG00000002479	ENSDART00000051545	5	1	1	ATCGGCAGAAGGGGAAGGAGGCTGC	7	+	35	3621
ENSDARG00000002479	ENSDART00000051545	5	1	1	TCCTCACCACTCAGGTGGGTGGTGT	7	+	1589	3621
ENSDARG00000002479	ENSDART00000051545	5	1	1	CTCCTCACCACTCAGGTGGGTGGTG	7	+	1588	3621
ENSDARG00000002479	ENSDART00000051545	5	1	1	CTCCTCACCACTCAGGTGGGTGGT	6	+	1588	3621
ENSDARG00000002479	ENSDART00000051545	5	1	1	GACATCATCAAACCGTATTTTCT	5	+	928	3621
ENSDARG00000002479	ENSDART00000051545	5	1	1	GACGACTACCAGGTCGCCGTTGGC	6	+	1170	3621
ENSDARG00000002479	ENSDART00000051545	5	1	1	GACTACGTCATTCTAGACGAGGCT	6	+	640	3621
ENSDARG00000002479	ENSDART00000051545	5	1	1	AAAAACTAAAGCTTGAAGAAGGC	5	+	980	3621
ENSDARG00000002479	ENSDART00000051545	5	1	1	TCCTCACCACTCAGGTGGGTGGT	5	+	1589	3621
ENSDARG00000002479	ENSDART00000051545	5	1	1	CACGGCTCCAGCAAGACTGAGCG	5	+	502	3621
ENSDARG00000002479	ENSDART00000051545	5	1	1	ACATACCTCAGCTCGGTGCAGGA	5	+	1099	3621
ENSDARG00000002479	ENSDART00000051545	5	1	1	ACCATCAGAAAGAGGGAGTAGCG	5	+	266	3621
ENSDARG00000002479	ENSDART00000051545	5	1	1	TCCAAATGCTAGAGAAGGCGTAGAG	7	+	1035	3621
ENSDARG00000002479	ENSDART00000051545	5	1	1	TACCTCAGCTCGGTGCAGGAGGA	5	+	1102	3621
ENSDARG00000002479	ENSDART00000051545	5	1	1	CTCCCAGTCAAGGAAGATGCTGGA	6	+	1437	3621
ENSDARG00000002479	ENSDART00000051545	5	2	2	GAAGACGACCCAGAGGATGCAGAG	6	+	2047	3621
ENSDARG00000002479	ENSDART00000051545	5	2	2	CTCGCCTCCACAGCATGGAGATGTT	7	+	1973	3621
ENSDARG00000002479	ENSDART00000051545	5	2	2	TTCACCAAAGAGCCAGCAGCTGAC	6	+	2023	3621
ENSDARG00000002479	ENSDART00000051545	5	2	2	AGAGCCAGCAGCTGACGAAGACGAC	7	+	2031	3621
ENSDARG00000002479	ENSDART00000051545	5	2	2	AGCTCAAGAGCTCATGCAGGCGGA	6	+	2103	3621
ENSDARG00000002479	ENSDART00000051545	5	2	2	CACCAAAGAGCCAGCAGCTGACGAA	7	+	2025	3621
ENSDARG00000002479	ENSDART00000051545	5	2	2	CTCTTCCTCCACTCAGCAGCAGCT	6	+	1893	3621
ENSDARG00000002479	ENSDART00000051545	5	2	2	CCCAAAACACTGAACCTGCTTGGCT	7	+	2162	3621
ENSDARG00000002479	ENSDART00000051545	5	2	2	CGCCTCCACAGCATGGAGATGTT	5	+	1975	3621
ENSDARG00000002479	ENSDART00000051545	5	3	3	AGAACCTCCCATCAGCTGAGGAT	5	+	2231	3621
ENSDARG00000002479	ENSDART00000051545	5	3	3	GTTATCAGCAGCGAAGTGGAAGTT	6	+	2317	3621
ENSDARG00000002479	ENSDART00000051545	5	3	3	AACCTCCCATCAGCTGAGGATGCA	6	+	2233	3621
ENSDARG00000002479	ENSDART00000051545	5	3	3	ATCAGCAGCGAAGTGGAAGTTGTT	6	+	2320	3621
ENSDARG00000002479	ENSDART00000051545	5	5	5	AGCCACAACAGATGAGCCTTTTAA	6	+	2748	3621
ENSDARG00000002479	ENSDART00000051545	5	6	6	ACCCAAAGCTGTTTTGGTTGATGGT	7	+	3090	3621
ENSDARG00000002479	ENSDART00000051545	5	6	6	TTCTACACCCAAAGCTGTTTTGGT	6	+	3084	3621
ENSDARG00000002479	ENSDART00000051545	5	6	6	TTCTACTCCGAATGAATCTGTGGAT	7	+	2919	3621
ENSDARG00000002479	ENSDART00000051545	5	6	6	TTCTACACCCAAAGCTGTTTTGGTT	7	+	3084	3621
ENSDARG00000002479	ENSDART00000051545	5	6	6	CTACACCCAAAGCTGTTTTGGTT	5	+	3086	3621
ENSDARG00000002479	ENSDART00000051545	5	6	6	TTCTTCTACACCCAAAGCTGTTTTG	7	+	3081	3621
ENSDARG00000002479	ENSDART00000051545	5	7	7	ACAAACACCGCTGCTGAAGCTTCT	6	+	3448	3621
ENSDARG00000002479	ENSDART00000051545	5	7	7	CTCCTAAAACAGTCCCTGTGGAAAC	7	+	3401	3621
ENSDARG00000002479	ENSDART00000051545	5	7	7	CTCCACAAACACCGCTGCTGAAGCT	7	+	3444	3621
ENSDARG00000002479	ENSDART00000051545	5	7	7	CACCGCTGCTGAAGCTTCTGACAAC	7	+	3453	3621
ENSDARG00000002479	ENSDART00000051545	5	7	7	CACAAACACCGCTGCTGAAGCTTCT	7	+	3447	3621
ENSDARG00000002479	ENSDART00000051545	5	7	7	AGCTCCACAAACACCGCTGCTGAA	6	+	3442	3621
ENSDARG00000002533	ENSDART00000050892	5	1	1	AGCGACACCAGAAAGTAATTGGTG	6	-	117	1053
ENSDARG00000002533	ENSDART00000050892	5	1	1	AGACTCACCTCAGGGGGATTTTGAC	7	-	313	1053
ENSDARG00000002533	ENSDART00000050892	5	1	1	ACCAGCACATTACCGGCGATGGA	5	-	55	1053
ENSDARG00000002533	ENSDART00000050892	5	2	2	TTCCCAGCATGATGAGGAGAGGCG	6	-	611	1053
ENSDARG00000002533	ENSDART00000050892	5	2	2	TGCAGCAGACCGTGATGTTGATTCT	7	-	710	1053
ENSDARG00000002533	ENSDART00000050892	5	2	2	TACTGCTGCTTCCATTGGAGCTGCG	7	-	1000	1053
ENSDARG00000002533	ENSDART00000050892	5	2	2	GCAACCAAAGAAGTTGAAGTAGAC	6	-	580	1053
ENSDARG00000002533	ENSDART00000050892	5	2	2	GAACGCAACCAAAGAAGTTGAAGTA	7	-	583	1053
ENSDARG00000002533	ENSDART00000050892	5	2	2	CGCTGCAGCAGACCGTGATGTTGAT	7	-	713	1053
ENSDARG00000002533	ENSDART00000050892	5	2	2	CGCAGCATCGTCATCGCTGCTGTT	6	-	481	1053
ENSDARG00000002533	ENSDART00000050892	5	2	2	CACTTCAACTCGATCTGACGGAGCT	7	-	668	1053
ENSDARG00000002533	ENSDART00000050892	5	2	2	AGCATCGTCATCGCTGCTGTTGCT	6	-	478	1053
ENSDARG00000002533	ENSDART00000097349	5	1	1	AGCGACACCAGAAAGTAATTGGTG	6	-	120	945
ENSDARG00000002533	ENSDART00000097349	5	1	1	AGACTCACCTCAGGGGGATTTTGAC	7	-	316	945
ENSDARG00000002533	ENSDART00000097349	5	1	1	ACCAGCACATTACCGGCGATGGA	5	-	58	945
ENSDARG00000002533	ENSDART00000097349	5	3	3	TTCCCAGCATGATGAGGAGAGGCG	6	-	545	945
ENSDARG00000002533	ENSDART00000097349	5	3	3	TGCAGCAGACCGTGATGTTGATTCT	7	-	644	945
ENSDARG00000002533	ENSDART00000097349	5	3	3	TACTGCTGCTTCCATTGGAGCTGCG	7	-	934	945
ENSDARG00000002533	ENSDART00000097349	5	3	3	GCAACCAAAGAAGTTGAAGTAGAC	6	-	514	945
ENSDARG00000002533	ENSDART00000097349	5	3	3	GAACGCAACCAAAGAAGTTGAAGTA	7	-	517	945
ENSDARG00000002533	ENSDART00000097349	5	3	3	CGCTGCAGCAGACCGTGATGTTGAT	7	-	647	945
ENSDARG00000002533	ENSDART00000097349	5	3	3	CACTTCAACTCGATCTGACGGAGCT	7	-	602	945
ENSDARG00000002771	ENSDART00000042002	5	1	1	GTTACCGTCGCAAACGCAGACGGA	6	+	47	3048
ENSDARG00000002771	ENSDART00000042002	5	1	1	AGAGACCGCTATGATCTGGAGGC	5	+	160	3048
ENSDARG00000002771	ENSDART00000042002	5	1	1	ACCGTCGCAAACGCAGACGGAGAC	6	+	50	3048
ENSDARG00000002771	ENSDART00000042002	5	2	2	GTCCCCGGCGGCTGAGCGGCTGCG	6	+	237	3048
ENSDARG00000002771	ENSDART00000042002	5	2	2	AGCGGCTGCGCTATATTTTGGGGGA	7	+	251	3048
ENSDARG00000002771	ENSDART00000042002	5	2	2	AGCGGCTGCGCTATATTTTGGGGG	6	+	251	3048
ENSDARG00000002771	ENSDART00000042002	5	4	4	AAAATCAGCTTTGTACTGCTGAGAA	7	+	568	3048
ENSDARG00000002771	ENSDART00000042002	5	5	5	AGCAGCAAACTATGGAAGACTAC	5	+	741	3048
ENSDARG00000002771	ENSDART00000042002	5	6	6	GTAGGCCACGCTCAAAGCAGGAGTA	7	+	760	3048
ENSDARG00000002771	ENSDART00000042002	5	7	7	AAATCCCCAGAGATGCAGAAGCA	5	+	842	3048
ENSDARG00000002771	ENSDART00000042002	5	7	7	AAAATCCCCAGAGATGCAGAAGCA	6	+	841	3048
ENSDARG00000002771	ENSDART00000042002	5	7	7	AGAAGCATCCAATGTTCTGGTGGG	6	+	858	3048
ENSDARG00000002771	ENSDART00000042002	5	7	7	AGAAAATCCCCAGAGATGCAGAA	5	+	839	3048
ENSDARG00000002771	ENSDART00000042002	5	9	9	TGCTTCCACCTGGAGAGTGGGAC	5	+	1148	3048
ENSDARG00000002771	ENSDART00000042002	5	10	10	GTTGGCTTACACAGGGAGGTGGGT	6	+	1335	3048
ENSDARG00000002771	ENSDART00000042002	5	10	10	GTTGGCTTACACAGGGAGGTGGG	5	+	1335	3048
ENSDARG00000002771	ENSDART00000042002	5	11	11	CTCTTCATCTACCTGGGCTGCATAA	7	+	1450	3048
ENSDARG00000002771	ENSDART00000042002	5	11	11	AACCAATGCAATCACCTTTGGGGGC	7	+	1473	3048
ENSDARG00000002771	ENSDART00000042002	5	12	12	GTATTCTGCGTTTTTGGCGGTCAAC	7	+	1570	3048
ENSDARG00000002771	ENSDART00000042002	5	13	13	GACGCCATCAAGAAGATGGTGGGCT	7	+	1825	3048
ENSDARG00000002771	ENSDART00000042002	5	13	13	TCCTTCATCTTCATCTCTGACGCC	6	+	1807	3048
ENSDARG00000002771	ENSDART00000042002	5	13	13	GACGCCATCAAGAAGATGGTGGG	5	+	1825	3048
ENSDARG00000002771	ENSDART00000042002	5	15	15	ACACCCAAACTCATTGTGCCTAC	5	+	2194	3048
ENSDARG00000002771	ENSDART00000042002	5	15	15	AAACACCCAAACTCATTGTGCCTAC	7	+	2192	3048
ENSDARG00000002771	ENSDART00000042002	5	17	17	GCAGCCTGCTCTTTTATGGGTCTGC	7	+	2437	3048
ENSDARG00000002771	ENSDART00000042002	5	19	19	GTTTTCCTCTACATGGGCGTTGCT	6	+	2668	3048
ENSDARG00000002771	ENSDART00000042002	5	19	19	TTCCTCTACATGGGCGTTGCTTCT	6	+	2671	3048
ENSDARG00000002771	ENSDART00000042002	5	20	20	CTATTCACACTGGTGCAGATTGT	5	+	2800	3048
ENSDARG00000002792	ENSDART00000014666	5	2	2	CTCCACAAACGTGTGCTGTTTGC	5	-	137	1527
ENSDARG00000002792	ENSDART00000014666	5	2	2	GTCTCCACAAACGTGTGCTGTTTGC	7	-	137	1527
ENSDARG00000002792	ENSDART00000014666	5	2	2	TCCGTCTCCACAAACGTGTGCTGTT	7	-	140	1527
ENSDARG00000002792	ENSDART00000014666	5	4	4	TGCTGCTGCTCATGCCGGAGCTGCC	7	-	565	1527
ENSDARG00000002792	ENSDART00000014666	5	4	4	TACCTAACAGGTGCAGGGGTGGGT	6	-	636	1527
ENSDARG00000002792	ENSDART00000014666	5	4	4	TACCTAACAGGTGCAGGGGTGGGTT	7	-	635	1527
ENSDARG00000002792	ENSDART00000014666	5	5	5	CTCTCCCTCTGACTTAAGTTTGT	5	-	722	1527
ENSDARG00000002792	ENSDART00000014666	5	7	7	AGATTCGTCTGTGGTTTGTAGTC	5	-	1097	1527
ENSDARG00000002792	ENSDART00000014666	5	10	10	GACCACAAATGATGTTTCTGTGGAG	7	-	1494	1527
ENSDARG00000002816	ENSDART00000083350	5	3	3	CTCTCAATCTCAGTGTCTTGGTC	5	-	505	3732
ENSDARG00000002816	ENSDART00000083350	5	5	5	GACATCATCATGGCTTATAGGTG	5	-	842	3732
ENSDARG00000002816	ENSDART00000083350	5	5	5	CTCAGCCTCCACCATGTTGAAGAC	6	-	739	3732
ENSDARG00000002816	ENSDART00000083350	5	5	5	TCCTCATGCTCTCAGCATGAGGA	5	-	702	3732
ENSDARG00000002816	ENSDART00000083350	5	7	7	ATCCGCCCCTCACACGCAGCATTG	6	-	1101	3732
ENSDARG00000002816	ENSDART00000083350	5	7	7	ATCAAAGTCCCGATTCTGCTTGC	5	-	1055	3732
ENSDARG00000002816	ENSDART00000083350	5	8	8	AGCTCCTCCAGTTTGGACTTGGCA	6	-	1239	3732
ENSDARG00000002816	ENSDART00000083350	5	10	10	GTTTGCCTCCTGAGCTGCGTGTGC	6	-	1511	3732
ENSDARG00000002816	ENSDART00000083350	5	11	11	GACAGCACACCACCTTGCTGCCGGA	7	-	1541	3732
ENSDARG00000002816	ENSDART00000083350	5	12	12	AGCACCACAGTGAAGGCCGGAGCA	6	-	1677	3732
ENSDARG00000002816	ENSDART00000083350	5	14	14	GTAAAAGGCTTTTTGTAGATGTC	5	-	2047	3732
ENSDARG00000002816	ENSDART00000083350	5	14	14	AACATCATCTTTATGGAGACGCG	5	-	1844	3732
ENSDARG00000002816	ENSDART00000083350	5	15	15	CTCTCCTTATGCTGCGGCGTAGTT	6	-	2477	3732
ENSDARG00000002816	ENSDART00000083350	5	15	15	CTCTCCTTATGCTGCGGCGTAGTTT	7	-	2476	3732
ENSDARG00000002816	ENSDART00000083350	5	15	15	CACCTCTCCTTATGCTGCGGCGTAG	7	-	2479	3732
ENSDARG00000002816	ENSDART00000083350	5	15	15	CACCTCTCCTTATGCTGCGGCGTA	6	-	2480	3732
ENSDARG00000002816	ENSDART00000083350	5	15	15	TGCGGCACAGTCTTGGAGATTTG	5	-	2145	3732
ENSDARG00000002816	ENSDART00000083350	5	15	15	TGCTGCAGATGATGAAGTGGTGGAC	7	-	2280	3732
ENSDARG00000002816	ENSDART00000083350	5	19	19	CCCACCTTAGTATGTTTGCTGTG	5	-	2919	3732
ENSDARG00000002816	ENSDART00000083350	5	20	20	TGCATCATCCTGGTCATCTTGAGAA	7	-	2943	3732
ENSDARG00000002816	ENSDART00000083350	5	21	21	GACTCAAAACACTCGGCCTTTGGG	6	-	3006	3732
ENSDARG00000002816	ENSDART00000083350	5	21	21	AGACTCAAAACACTCGGCCTTTGGG	7	-	3006	3732
ENSDARG00000002816	ENSDART00000083350	5	23	23	GTCTTCTTCAGCCTGTAGATGGC	5	-	3340	3732
ENSDARG00000002816	ENSDART00000083350	5	23	23	TTCTTCAGCCTGTAGATGGCGCT	5	-	3337	3732
ENSDARG00000002816	ENSDART00000083350	5	25	25	ACCTTCCTCTGTGAAATTTGGAGTT	7	-	3531	3732
ENSDARG00000002830	ENSDART00000046384	5	2	1	GTAAACATCCCCTGCTGCAGCCTGT	7	-	168	1866
ENSDARG00000002830	ENSDART00000046384	5	2	1	TCCTCCGTCAGTTCTTCTGGTTTC	6	-	69	1866
ENSDARG00000002830	ENSDART00000046384	5	2	1	TGCTGCAGCCTGTCCTTCTGCTGCT	7	-	156	1866
ENSDARG00000002830	ENSDART00000046384	5	2	1	TTAATCCCATGCTTGTTGAGGAA	5	-	286	1866
ENSDARG00000002830	ENSDART00000046384	5	2	1	GACAAAGGCAAACTTTTGTCTGC	5	-	332	1866
ENSDARG00000002830	ENSDART00000046384	5	2	1	AGAAAATACCTGGCGAGTTTTTGGA	7	-	659	1866
ENSDARG00000002830	ENSDART00000046384	5	2	1	AAAGGCAAACTTTTGTCTGCCGAG	6	-	328	1866
ENSDARG00000002830	ENSDART00000046384	5	2	1	AGAAAATACCTGGCGAGTTTTTG	5	-	661	1866
ENSDARG00000002830	ENSDART00000046384	5	3	2	GACAACACATTTTGTTGTGTTTTT	6	-	728	1866
ENSDARG00000002830	ENSDART00000046384	5	3	2	GACAACACATTTTGTTGTGTTTTTC	7	-	727	1866
ENSDARG00000002830	ENSDART00000046384	5	7	6	CAAATCCTCTGTGCCCGCAGATGTT	7	-	1206	1866
ENSDARG00000002830	ENSDART00000046384	5	7	6	GCCCGCAGATGTTCTGGGTTGAC	5	-	1196	1866
ENSDARG00000002830	ENSDART00000046384	5	8	7	AGCCCATTCACCCACGGCCGAGTAC	7	-	1344	1866
ENSDARG00000002830	ENSDART00000046384	5	12	11	CTATACGTCAGTGTTGGTGCTGTA	6	-	1855	1866
ENSDARG00000002830	ENSDART00000046384	5	12	11	CTCCTCGCACACGGTTTGAGGGA	5	-	1743	1866
ENSDARG00000002949	ENSDART00000007458	5	4	4	GACCGCATCACACTGTTGCGTGGCA	7	+	322	915
ENSDARG00000002949	ENSDART00000007458	5	6	6	TCCCTCACAAGGGAGCATTTTGT	5	+	563	915
ENSDARG00000002949	ENSDART00000007458	5	6	6	CTATCAGTCCAAGAGGAGCTGGC	5	+	626	915
ENSDARG00000002949	ENSDART00000007458	5	7	7	GGCTACAAATTTATGTTTGATGAG	6	+	736	915
ENSDARG00000002949	ENSDART00000007458	5	7	7	CACATCAACAACTTGAAGCTGAT	5	+	685	915
ENSDARG00000002949	ENSDART00000007458	5	7	7	ATCAACAACTTGAAGCTGATTTG	5	+	688	915
ENSDARG00000002949	ENSDART00000007458	5	7	7	AACTACTGCTACCGCTGCGGTAAC	6	+	787	915
ENSDARG00000002986	ENSDART00000014013	5	1	1	TACTGCACAACTCTGTCTTAGGAG	6	+	95	1353
ENSDARG00000002986	ENSDART00000014013	5	1	1	GCACAACTCTGTCTTAGGAGTCGAC	7	+	99	1353
ENSDARG00000002986	ENSDART00000014013	5	1	1	CTCCACACCGCAAACTGCAGTGGAA	7	+	69	1353
ENSDARG00000002986	ENSDART00000014013	5	1	1	ACAACCACACGCATTGCGCATGT	5	+	25	1353
ENSDARG00000002986	ENSDART00000014013	5	1	1	AACAACCACACGCATTGCGCATGT	6	+	24	1353
ENSDARG00000002986	ENSDART00000014013	5	3	3	AACATCTACACTAAAGTTGTGGTA	6	+	376	1353
ENSDARG00000002986	ENSDART00000014013	5	7	7	CAAAGCTTCACATTCAGGTTTGTTC	7	+	713	1353
ENSDARG00000002986	ENSDART00000014013	5	11	11	GCATCAGACTCTGACCTTTGAGGAG	7	+	1092	1353
ENSDARG00000002987	ENSDART00000010757	5	2	2	GACGTCAGAGAAACGAAGTCGGT	5	-	163	1308
ENSDARG00000002987	ENSDART00000010757	5	2	2	CTCACCTTATTGGTAGCTGTGGCA	6	-	621	1308
ENSDARG00000002987	ENSDART00000010757	5	2	2	CCCTTCAACTTTACATGTTTGAAAC	7	-	525	1308
ENSDARG00000002987	ENSDART00000010757	5	2	2	TGCCCAGCATGGCGGAGTGGAAGAC	7	-	292	1308
ENSDARG00000002987	ENSDART00000010757	5	2	2	ATCAAAGCCATCCAGTGATGGGTTC	7	-	192	1308
ENSDARG00000002987	ENSDART00000010757	5	2	2	AACCGCGACACGTGGTGGTGATGCC	7	-	413	1308
ENSDARG00000002987	ENSDART00000010757	5	2	2	GTACGCTGCGTACAGGCCGAATAG	6	-	243	1308
ENSDARG00000002987	ENSDART00000010757	5	3	3	GTCACCTCCGCTGATGGTGCCGTC	6	-	727	1308
ENSDARG00000002987	ENSDART00000010757	5	3	3	GTAGGCGGCAGTGGTGAAGTTGGC	6	-	1156	1308
ENSDARG00000002987	ENSDART00000010757	5	3	3	GGCTTCCACCCTGGGCTGCTGCT	5	-	1022	1308
ENSDARG00000002987	ENSDART00000010757	5	3	3	GGCCAAGCACGGGCAGCTGGAGGT	6	-	974	1308
ENSDARG00000002987	ENSDART00000010757	5	3	3	GAAGGCGGCTGGAAGGTCGTCTGT	6	-	700	1308
ENSDARG00000002987	ENSDART00000010757	5	3	3	CACCTCCGCTGATGGTGCCGTCTAC	7	-	724	1308
ENSDARG00000002987	ENSDART00000097501	5	1	1	GACGTCAGAGAAACGAAGTCGGT	5	-	43	1194
ENSDARG00000002987	ENSDART00000097501	5	1	1	CTCACCTTATTGGTAGCTGTGGCA	6	-	501	1194
ENSDARG00000002987	ENSDART00000097501	5	1	1	CCCTTCAACTTTACATGTTTGAAAC	7	-	405	1194
ENSDARG00000002987	ENSDART00000097501	5	1	1	TGCCCAGCATGGCGGAGTGGAAGAC	7	-	172	1194
ENSDARG00000002987	ENSDART00000097501	5	1	1	ATCAAAGCCATCCAGTGATGGGTTC	7	-	72	1194
ENSDARG00000002987	ENSDART00000097501	5	1	1	AACCGCGACACGTGGTGGTGATGCC	7	-	293	1194
ENSDARG00000002987	ENSDART00000097501	5	1	1	GTACGCTGCGTACAGGCCGAATAG	6	-	123	1194
ENSDARG00000002987	ENSDART00000097501	5	3	3	GTCACCTCCGCTGATGGTGCCGTC	6	-	613	1194
ENSDARG00000002987	ENSDART00000097501	5	3	3	GTAGGCGGCAGTGGTGAAGTTGGC	6	-	1042	1194
ENSDARG00000002987	ENSDART00000097501	5	3	3	GGCTTCCACCCTGGGCTGCTGCT	5	-	908	1194
ENSDARG00000002987	ENSDART00000097501	5	3	3	GGCCAAGCACGGGCAGCTGGAGGT	6	-	860	1194
ENSDARG00000002987	ENSDART00000097501	5	3	3	GAAGGCGGCTGGAAGGTCGTCTGT	6	-	586	1194
ENSDARG00000002987	ENSDART00000097501	5	3	3	CACCTCCGCTGATGGTGCCGTCTAC	7	-	610	1194
ENSDARG00000003032	ENSDART00000011878	5	3	3	CTCATCCCAGTTACTCTGCAGTC	5	-	74	1218
ENSDARG00000003032	ENSDART00000011878	5	4	4	ATCTGCTGCAGGATGGAGATGGC	5	-	268	1218
ENSDARG00000003032	ENSDART00000011878	5	5	5	TGCTTCAGCCTGCAGTTTTTGAA	5	-	440	1218
ENSDARG00000003032	ENSDART00000011878	5	7	7	CAACACCTCTGCAGGCATGGTAG	5	-	650	1218
ENSDARG00000003032	ENSDART00000011878	5	7	7	TCCAACACCTCTGCAGGCATGGTAG	7	-	650	1218
ENSDARG00000003032	ENSDART00000011878	5	7	7	GTTCACGCATAAACTTAGTTGTG	5	-	678	1218
ENSDARG00000003032	ENSDART00000011878	5	7	7	CACCTCTGCAGGCATGGTAGCTGAC	7	-	645	1218
ENSDARG00000003032	ENSDART00000011878	5	9	9	TGCTCACCAGCAGATCTGTGGTA	5	-	990	1218
ENSDARG00000003032	ENSDART00000011878	5	11	11	CTCTTCTACGGTGGTGTTGTAGAA	6	-	1177	1218
ENSDARG00000003091	ENSDART00000007247	5	2	1	GTCTGCTGCCATACGGGGGAGGGT	6	-	32	1470
ENSDARG00000003091	ENSDART00000007247	5	2	1	GTCTGCTGCCATACGGGGGAGGG	5	-	33	1470
ENSDARG00000003091	ENSDART00000007247	5	4	3	CTCGACACCACCAGGATGAAGAT	5	-	475	1470
ENSDARG00000003091	ENSDART00000007247	5	4	3	CACCAAGGCCCATGTTGTTGGCGTC	7	-	229	1470
ENSDARG00000003091	ENSDART00000007247	5	4	3	AGCCACACACATAATGATGATGAT	6	-	166	1470
ENSDARG00000003091	ENSDART00000007247	5	11	10	TTCTTCATCTGATAGTCTGTAGAC	6	-	1383	1470
ENSDARG00000003091	ENSDART00000098513	5	2	2	CTCGACACCACCAGGATGAAGAT	5	-	409	1404
ENSDARG00000003091	ENSDART00000098513	5	2	2	CACCAAGGCCCATGTTGTTGGCGTC	7	-	163	1404
ENSDARG00000003091	ENSDART00000098513	5	2	2	AGCCACACACATAATGATGATGAT	6	-	100	1404
ENSDARG00000003091	ENSDART00000098513	5	9	9	TTCTTCATCTGATAGTCTGTAGAC	6	-	1317	1404
ENSDARG00000003091	ENSDART00000098514	5	1	1	GTCTGCTGCCATACGGGGGAGGG	5	-	30	1383
ENSDARG00000003091	ENSDART00000098514	5	1	1	GTCTGCTGCCATACGGGGGAGGGT	6	-	29	1383
ENSDARG00000003091	ENSDART00000098514	5	2	2	AGCCACACACATAATGATGATGAT	6	-	157	1383
ENSDARG00000003091	ENSDART00000098514	5	2	2	CACCAAGGCCCATGTTGTTGGCGTC	7	-	220	1383
ENSDARG00000003091	ENSDART00000098514	5	3	3	CTCGACACCACCAGGATGAAGAT	5	-	445	1383
ENSDARG00000003091	ENSDART00000098514	5	9	9	TTCTTCATCTGATAGTCTGTAGAC	6	-	1296	1383
ENSDARG00000003091	ENSDART00000098517	5	1	1	GTCTGCTGCCATACGGGGGAGGG	5	-	30	1413
ENSDARG00000003091	ENSDART00000098517	5	1	1	GTCTGCTGCCATACGGGGGAGGGT	6	-	29	1413
ENSDARG00000003091	ENSDART00000098517	5	2	2	AGCCACACACATAATGATGATGAT	6	-	157	1413
ENSDARG00000003091	ENSDART00000098517	5	2	2	CACCAAGGCCCATGTTGTTGGCGTC	7	-	220	1413
ENSDARG00000003091	ENSDART00000098517	5	2	2	CTCGACACCACCAGGATGAAGAT	5	-	466	1413
ENSDARG00000003091	ENSDART00000098517	5	8	8	TTCTTCATCTGATAGTCTGTAGAC	6	-	1326	1413
ENSDARG00000003144	ENSDART00000026516	5	1	1	GCCCTCGCCAGCAAAGAGGGGTCT	6	-	36	582
ENSDARG00000003235	ENSDART00000023123	5	1	1	GCCGTCAGAGTTCAGCTGTCGCA	5	-	200	2160
ENSDARG00000003235	ENSDART00000023123	5	2	2	GACTTCTTCCCCCAGCGCTGTGGCA	7	-	356	2160
ENSDARG00000003235	ENSDART00000023123	5	2	2	TTCTTCCCCCAGCGCTGTGGCAGCT	7	-	353	2160
ENSDARG00000003235	ENSDART00000023123	5	2	2	ACACACCTCGAACAGCGGCGGGT	5	-	263	2160
ENSDARG00000003235	ENSDART00000023123	5	2	2	ACACACCTCGAACAGCGGCGGGTTG	7	-	261	2160
ENSDARG00000003235	ENSDART00000023123	5	3	3	AGACGCAGAACTGGTGAAGAAGCG	6	-	436	2160
ENSDARG00000003235	ENSDART00000023123	5	3	3	ACAGACGCAGAACTGGTGAAGAA	5	-	439	2160
ENSDARG00000003235	ENSDART00000023123	5	5	5	AAAGTCAAAAGCCACCGCCGTCTCT	7	-	654	2160
ENSDARG00000003235	ENSDART00000023123	5	6	6	GCACACGCATCGTAGCCGTAGTT	5	-	862	2160
ENSDARG00000003235	ENSDART00000023123	5	6	6	CACAGCACACGCATCGTAGCCGTA	6	-	865	2160
ENSDARG00000003235	ENSDART00000023123	5	7	7	CTCTTCTCCAGCAGGCAGTTTAA	5	-	1070	2160
ENSDARG00000003235	ENSDART00000023123	5	7	7	CTCAAATACGTAGAGCGAAGGTGCC	7	-	1023	2160
ENSDARG00000003235	ENSDART00000023123	5	8	8	ACCCCAGCCTCATGGGTGCAGTG	5	-	1165	2160
ENSDARG00000003235	ENSDART00000023123	5	8	8	CACCCCAGCCTCATGGGTGCAGTG	6	-	1165	2160
ENSDARG00000003235	ENSDART00000023123	5	8	8	GACTCCAGAAACTTGTGTAGTTTTT	7	-	1214	2160
ENSDARG00000003235	ENSDART00000023123	5	8	8	GACTCCAGAAACTTGTGTAGTTT	5	-	1216	2160
ENSDARG00000003235	ENSDART00000023123	5	9	9	CTATACAGCGCTGCTCTGCCGCC	5	-	1272	2160
ENSDARG00000003235	ENSDART00000023123	5	10	10	AAAACCCGCGAACTGGAGCCGGC	5	-	1335	2160
ENSDARG00000003235	ENSDART00000023123	5	10	10	ACATACAGCAGAGGGAGCAGGAGAC	7	-	1418	2160
ENSDARG00000003235	ENSDART00000023123	5	11	11	TACCTCAGCATTAATGGATTGGTG	6	-	1569	2160
ENSDARG00000003235	ENSDART00000023123	5	11	11	CACAGCAGCGGAGGAGAAGCCGGG	6	-	1449	2160
ENSDARG00000003235	ENSDART00000023123	5	11	11	ACCTCAGCATTAATGGATTGGTG	5	-	1569	2160
ENSDARG00000003235	ENSDART00000023123	5	12	12	ACATTCAGAAGGAGGAGGAGACGAG	7	-	1605	2160
ENSDARG00000003235	ENSDART00000023123	5	14	14	TTATCCGCCAGTCGCTCTGCAGCT	6	-	1797	2160
ENSDARG00000003235	ENSDART00000023123	5	14	14	TGCAGCTTCTGTCAGGCTTTTTCT	6	-	1780	2160
ENSDARG00000003235	ENSDART00000023123	5	14	14	TGCAGCTTCTGTCAGGCTTTTTC	5	-	1781	2160
ENSDARG00000003235	ENSDART00000023123	5	16	16	TGCAAACACTTCCTCTGGTGGGCG	6	-	2067	2160
ENSDARG00000003235	ENSDART00000023123	5	16	16	AAACACTTCCTCTGGTGGGCGTTT	6	-	2064	2160
ENSDARG00000003235	ENSDART00000023123	5	16	16	CACTTCCTCTGGTGGGCGTTTAG	5	-	2062	2160
ENSDARG00000003235	ENSDART00000023123	5	16	16	TGCTCCCGCGTTCATCTGCTTCT	5	-	2015	2160
ENSDARG00000003235	ENSDART00000023123	5	16	16	CCCTGCAAACACTTCCTCTGGTGGG	7	-	2069	2160
ENSDARG00000003235	ENSDART00000023123	5	16	16	AAACACTTCCTCTGGTGGGCGTT	5	-	2065	2160
ENSDARG00000003281	ENSDART00000012844	5	1	1	CGCTCAGCAGGAGCATGAAGTATAG	7	-	28	795
ENSDARG00000003281	ENSDART00000012844	5	1	1	CAAACCAACGCTCAGCAGGAGCA	5	-	38	795
ENSDARG00000003281	ENSDART00000012844	5	1	1	ACCAAACCAACGCTCAGCAGGAGCA	7	-	38	795
ENSDARG00000003281	ENSDART00000012844	5	4	4	GTCTCCACCATTCTTTGGGTGAGTC	7	-	368	795
ENSDARG00000003281	ENSDART00000012844	5	4	4	GTCCACTTCTGACCTGCTGGCGGA	6	-	458	795
ENSDARG00000003281	ENSDART00000012844	5	4	4	CGCTGCACCCTCCACCTGTGAGGGG	7	-	414	795
ENSDARG00000003281	ENSDART00000012844	5	4	4	AACGTCTCCACCATTCTTTGGGT	5	-	373	795
ENSDARG00000003281	ENSDART00000012844	5	5	5	GCCTCCTCCAAGTAGGATGATAA	5	-	542	795
ENSDARG00000003281	ENSDART00000012844	5	5	5	TGCCTCCTCCAAGTAGGATGATAA	6	-	542	795
ENSDARG00000003403	ENSDART00000040184	5	1	1	GAAATCAGCTCCCGGTAGAGGCT	5	-	89	7164
ENSDARG00000003403	ENSDART00000040184	5	2	2	CCCAGCAGAGCGTCCCGCGTGAGTG	7	-	302	7164
ENSDARG00000003403	ENSDART00000040184	5	5	5	CTACACAACACCGGGCATGAGTC	5	-	679	7164
ENSDARG00000003403	ENSDART00000040184	5	5	5	GTTATCGCCCTTGAATGCAGGAGCA	7	-	840	7164
ENSDARG00000003403	ENSDART00000040184	5	5	5	CACTACACAACACCGGGCATGAGTC	7	-	679	7164
ENSDARG00000003403	ENSDART00000040184	5	6	6	CACACCCTCCCGTCTGTGTTTGGTA	7	-	1012	7164
ENSDARG00000003403	ENSDART00000040184	5	6	6	CACACCCTCCCGTCTGTGTTTGGT	6	-	1013	7164
ENSDARG00000003403	ENSDART00000040184	5	6	6	GTCTTCGCCACTCCAGCCTTGTTC	6	-	1042	7164
ENSDARG00000003403	ENSDART00000040184	5	6	6	ACACACACCCTCCCGTCTGTGTTT	6	-	1016	7164
ENSDARG00000003403	ENSDART00000040184	5	6	6	ACACCCTCCCGTCTGTGTTTGGT	5	-	1013	7164
ENSDARG00000003403	ENSDART00000040184	5	6	6	ACACCCTCCCGTCTGTGTTTGGTA	6	-	1012	7164
ENSDARG00000003403	ENSDART00000040184	5	6	6	ACACCCTCCCGTCTGTGTTTGGTAC	7	-	1011	7164
ENSDARG00000003403	ENSDART00000040184	5	7	7	CAACACACACACTATGTGGACTGC	6	-	1094	7164
ENSDARG00000003403	ENSDART00000040184	5	10	10	GTTCACGCCAACGAGAGGAGTTC	5	-	1667	7164
ENSDARG00000003403	ENSDART00000040184	5	11	11	GCAGACAGAACAACGGCATGAGGG	6	-	1923	7164
ENSDARG00000003403	ENSDART00000040184	5	11	11	AGCAGCAAAGCGTGGAAGGGGAG	5	-	1946	7164
ENSDARG00000003403	ENSDART00000040184	5	11	11	GTCAGCAGCAAAGCGTGGAAGGG	5	-	1949	7164
ENSDARG00000003403	ENSDART00000040184	5	11	11	AACAACGGCATGAGGGCTGATAA	5	-	1916	7164
ENSDARG00000003403	ENSDART00000040184	5	12	12	AGCCACAGACAGGTGGACTTTGGC	6	-	2134	7164
ENSDARG00000003403	ENSDART00000040184	5	12	12	GACAGCCACAGACAGGTGGACTTT	6	-	2137	7164
ENSDARG00000003403	ENSDART00000040184	5	12	12	ACAGCCACAGACAGGTGGACTTT	5	-	2137	7164
ENSDARG00000003403	ENSDART00000040184	5	12	12	GGCCAAGCCCAGCGGGAGGGTGGA	6	-	2113	7164
ENSDARG00000003403	ENSDART00000040184	5	13	13	CTCTCCAGATTGAGGACGTGGTG	5	-	2395	7164
ENSDARG00000003403	ENSDART00000040184	5	13	13	TCCATCCGCCCAGGTTTGATGGC	5	-	2361	7164
ENSDARG00000003403	ENSDART00000040184	5	13	13	CCCTCACCACTCTCCAGATTGAGGA	7	-	2402	7164
ENSDARG00000003403	ENSDART00000040184	5	14	14	CTCCACCGCTGGGCCGTTGCAGTT	6	-	2524	7164
ENSDARG00000003403	ENSDART00000040184	5	14	14	GTCCCCATCACTGTGGAGATGAC	5	-	2473	7164
ENSDARG00000003403	ENSDART00000040184	5	14	14	GGCAAAATCCTGCGGATGTAGTT	5	-	2614	7164
ENSDARG00000003403	ENSDART00000040184	5	14	14	TTCGGCAAAATCCTGCGGATGTA	5	-	2617	7164
ENSDARG00000003403	ENSDART00000040184	5	14	14	TTCTGCTCCACCGCTGGGCCGTT	5	-	2530	7164
ENSDARG00000003403	ENSDART00000040184	5	14	14	TGCTCCACCGCTGGGCCGTTGCA	5	-	2527	7164
ENSDARG00000003403	ENSDART00000040184	5	15	15	GTTCTCACCCCTGGGGTTGCTGAG	6	-	2887	7164
ENSDARG00000003403	ENSDART00000040184	5	15	15	TTCTCACCCCTGGGGTTGCTGAGTG	7	-	2885	7164
ENSDARG00000003403	ENSDART00000040184	5	15	15	TCCATCACCGCACTGGTTGGGGTG	6	-	2842	7164
ENSDARG00000003403	ENSDART00000040184	5	15	15	TCCATCACCGCACTGGTTGGGGT	5	-	2843	7164
ENSDARG00000003403	ENSDART00000040184	5	15	15	TACAGCTTCCCGCTGCTGGTGTC	5	-	2734	7164
ENSDARG00000003403	ENSDART00000040184	5	15	15	TTCTCACCCCTGGGGTTGCTGAG	5	-	2887	7164
ENSDARG00000003403	ENSDART00000040184	5	15	15	GCCTCCATCACCGCACTGGTTGGGG	7	-	2844	7164
ENSDARG00000003403	ENSDART00000040184	5	15	15	ATCACCGCACTGGTTGGGGTGGAA	6	-	2839	7164
ENSDARG00000003403	ENSDART00000040184	5	15	15	ATCACCGCACTGGTTGGGGTGGA	5	-	2840	7164
ENSDARG00000003403	ENSDART00000040184	5	16	16	AGAGTCGCAGCTGATCGGCTGAGAA	7	-	3015	7164
ENSDARG00000003403	ENSDART00000040184	5	17	17	GAAAAACACTCGCAGTTGGGGTC	5	-	3400	7164
ENSDARG00000003403	ENSDART00000040184	5	17	17	TGCAACAACTCGCACTTGCTGAGAC	7	-	3150	7164
ENSDARG00000003403	ENSDART00000040184	5	17	17	CAACAACTCGCACTTGCTGAGAC	5	-	3150	7164
ENSDARG00000003403	ENSDART00000040184	5	18	18	CGCAACTGCGCTATGGTGCCTTC	5	-	3721	7164
ENSDARG00000003403	ENSDART00000040184	5	18	18	AGAAACCGCTAGAGATGAGGGAGAC	7	-	3459	7164
ENSDARG00000003403	ENSDART00000040184	5	19	19	GTTATCCGCAGAGTGGTTTGTAA	5	-	4064	7164
ENSDARG00000003403	ENSDART00000040184	5	20	20	TGCCACGGCTGGTTCGGTGCTGAG	6	-	4186	7164
ENSDARG00000003403	ENSDART00000040184	5	20	20	TGCACCTTCCCACAGTGGGATGGA	6	-	4244	7164
ENSDARG00000003403	ENSDART00000040184	5	21	21	AGACAACACATTCCTGTTGTGTGC	6	-	4369	7164
ENSDARG00000003403	ENSDART00000040184	5	21	21	GACAACACATTCCTGTTGTGTGC	5	-	4369	7164
ENSDARG00000003403	ENSDART00000040184	5	22	22	GTATCCCACAGATAGAGAGGTCTGC	7	-	4764	7164
ENSDARG00000003403	ENSDART00000040184	5	22	22	CGCCTCATCGTAAGTGAAGGTAAC	6	-	4957	7164
ENSDARG00000003403	ENSDART00000040184	5	23	23	GTAAACATCTCCATACGGTGTGTAC	7	-	6009	7164
ENSDARG00000003403	ENSDART00000040184	5	23	23	CACGTCCACATATCGGTAGAGGTC	6	-	5182	7164
ENSDARG00000003403	ENSDART00000040184	5	23	23	TGCAGCGTCATCCAGTAGGCGAT	5	-	5350	7164
ENSDARG00000003403	ENSDART00000040184	5	23	23	TCCGCCCACAATTCGTGATTAGGCG	7	-	6155	7164
ENSDARG00000003403	ENSDART00000040184	5	23	23	AGCGTCATCCAGTAGGCGATGGA	5	-	5347	7164
ENSDARG00000003403	ENSDART00000040184	5	23	23	CACCAATGCGAATATCGCAGTTTGT	7	-	5395	7164
ENSDARG00000003403	ENSDART00000040184	5	24	24	GTTCTCCACTTTTGGTTTGGGAA	5	-	6329	7164
ENSDARG00000003403	ENSDART00000040184	5	25	25	CTCCAACCATAGCGCTGATTTGGGA	7	-	6814	7164
ENSDARG00000003403	ENSDART00000040184	5	25	25	GCCTCCAGAGGACCAGCCTTGGTG	6	-	6717	7164
ENSDARG00000003403	ENSDART00000040184	5	25	25	CCCTCCAACCATAGCGCTGATTTG	6	-	6817	7164
ENSDARG00000003592	ENSDART00000011337	5	3	3	AACCACTTCAGAAAGGTGTCTTC	5	-	211	927
ENSDARG00000003592	ENSDART00000011337	5	3	3	TTCCAAGACAAAAGGTGGTGACGGG	7	-	247	927
ENSDARG00000003592	ENSDART00000011337	5	3	3	TCCTTCGACAGTGGAAGTTGATTGT	7	-	174	927
ENSDARG00000003592	ENSDART00000011337	5	4	4	GACTCACTCTACAGGCAGTGGGA	5	-	347	927
ENSDARG00000003592	ENSDART00000011337	5	8	8	AACAAACCATGTGATGACGTATTG	6	-	856	927
ENSDARG00000003592	ENSDART00000011337	5	9	9	GCATACCACATGTAGGAAGTAGCA	6	-	888	927
ENSDARG00000003635	ENSDART00000015136	5	2	2	GTTTACCTCTCTCAGGTGTGTGC	5	-	198	993
ENSDARG00000003635	ENSDART00000015136	5	4	4	GGCTCCAAAACACATGATGCCGTG	6	-	343	993
ENSDARG00000003635	ENSDART00000015136	5	4	4	TTCCGCAAATCCATTGCGGTCTGT	6	-	382	993
ENSDARG00000003635	ENSDART00000015136	5	5	5	CTCTGCTCCACCAATGATGATGAC	6	-	559	993
ENSDARG00000003635	ENSDART00000015136	5	6	6	AGCAAAACCCATAATCTGCTTAA	5	-	764	993
ENSDARG00000003635	ENSDART00000015136	5	6	6	GAAGCCACCGGCCTCCTGTGAAGAT	7	-	793	993
ENSDARG00000003635	ENSDART00000015136	5	6	6	GCCACCGGCCTCCTGTGAAGATGCA	7	-	790	993
ENSDARG00000003635	ENSDART00000015136	5	7	7	TTCACCAGAGGGACGTTTATGGGGC	7	-	857	993
ENSDARG00000003803	ENSDART00000011952	5	1	1	CTCCTCTGCTGAAGCATTTGTCGGC	7	-	127	573
ENSDARG00000003803	ENSDART00000011952	5	3	3	TTCAGCGTCTCGAGCTGCTTGGCG	6	-	426	573
ENSDARG00000003803	ENSDART00000097164	5	2	2	CTCCTCTGCTGAAGCATTTGTCGGC	7	-	196	600
ENSDARG00000003803	ENSDART00000097164	5	4	4	TTCAGCGTCTCGAGCTGCTTGGCG	6	-	495	600
ENSDARG00000003803	ENSDART00000097165	5	1	1	CTCCTCTGCTGAAGCATTTGTCGGC	7	-	118	597
ENSDARG00000003803	ENSDART00000097165	5	3	3	GAATCACTCGATTGGGGCTTTTTTG	7	-	401	597
ENSDARG00000003803	ENSDART00000097165	5	3	3	GAATCACTCGATTGGGGCTTTTTT	6	-	402	597
ENSDARG00000003803	ENSDART00000097165	5	4	4	TTCAGCGTCTCGAGCTGCTTGGCG	6	-	462	597
ENSDARG00000003808	ENSDART00000009182	5	1	1	TTATCCAGAACGCTTTTCTGCCAAC	7	-	14	888
ENSDARG00000003808	ENSDART00000009182	5	2	2	AACCCAAAAGCAAGGTTTGCAGTG	6	-	180	888
ENSDARG00000003808	ENSDART00000009182	5	2	2	AAACCCAAAAGCAAGGTTTGCAGTG	7	-	180	888
ENSDARG00000003808	ENSDART00000009182	5	4	4	GTCAAAAAATCCATTTAGGGGGG	5	-	482	888
ENSDARG00000003808	ENSDART00000009182	5	4	4	CAAAAAATCCATTTAGGGGGGTGAG	7	-	478	888
ENSDARG00000003808	ENSDART00000009182	5	4	4	AAAAAATCCATTTAGGGGGGTGAG	6	-	478	888
ENSDARG00000003808	ENSDART00000009182	5	5	5	TCCAAAATCTCGAGCTGGGTTTAC	6	-	655	888
ENSDARG00000003808	ENSDART00000009182	5	6	6	CACCTCCTCTCTAGCTTTAGCTTTC	7	-	843	888
ENSDARG00000003808	ENSDART00000009182	5	6	6	AAATCATTCCTTGCTGGCGACGTC	6	-	880	888
ENSDARG00000004023	ENSDART00000010896	5	2	2	AAAAGCGTCTAATCTCGTTGTGTGT	7	+	71	1080
ENSDARG00000004023	ENSDART00000010896	5	3	3	AGCTCATCCCAGGAGATGAGTTC	5	+	380	1080
ENSDARG00000004023	ENSDART00000010896	5	4	4	AACAGCTCCATACCTTGAGGACTTG	7	+	614	1080
ENSDARG00000004023	ENSDART00000010896	5	5	5	GGCAAACCAAGTGGAGGTGCAGAG	6	+	876	1080
ENSDARG00000004023	ENSDART00000010896	5	5	5	AGACACGACGGTGGTTTGCAGGC	5	+	856	1080
ENSDARG00000004023	ENSDART00000010896	5	5	5	GCAGGCAAACCAAGTGGAGGTGCA	6	+	873	1080
ENSDARG00000004023	ENSDART00000010896	5	5	5	ATCTGCAGAACATCCAGGGGATGAC	7	+	800	1080
ENSDARG00000004023	ENSDART00000010896	5	6	6	AACTCCACAGGGAGCGAGGTCGCG	6	+	1006	1080
ENSDARG00000004023	ENSDART00000010896	5	6	6	AAACTCCACAGGGAGCGAGGTCGCG	7	+	1005	1080
ENSDARG00000004023	ENSDART00000010896	5	6	6	AGATACACCAAACAGCATGGTAG	5	+	1050	1080
ENSDARG00000004130	ENSDART00000006673	5	1	1	CTCCACGGCGAGCATTCTGTCGTG	6	+	55	1188
ENSDARG00000004130	ENSDART00000006673	5	2	2	TGCAGCCTCTACTTGCTGGCTCT	5	+	209	1188
ENSDARG00000004130	ENSDART00000006673	5	2	2	ATCTGCGCACATACCTGCGGCTGC	6	+	110	1188
ENSDARG00000004130	ENSDART00000006673	5	2	2	ATCTGCGCACATACCTGCGGCTGCA	7	+	110	1188
ENSDARG00000004130	ENSDART00000006673	5	4	4	TGCCTATAATGTTTGTCTGTCTGC	6	+	447	1188
ENSDARG00000004130	ENSDART00000006673	5	4	4	CTCTGCTTATGGCTCAGCAGGAGTC	7	+	503	1188
ENSDARG00000004130	ENSDART00000006673	5	9	9	CACAGCAAACTGACAGGGGCAGGA	6	+	991	1188
ENSDARG00000004130	ENSDART00000006673	5	9	9	AGCATCATCTGAATGTGATGGGTGT	7	+	914	1188
ENSDARG00000004130	ENSDART00000006673	5	9	9	ACCAGCATCATCTGAATGTGATGGG	7	+	911	1188
ENSDARG00000004130	ENSDART00000006673	5	10	10	TACAACAACACTCTTCTGCTGCT	5	+	1139	1188
ENSDARG00000004232	ENSDART00000019259	5	2	2	CACGTCCTCAGAATGCTTGAGAC	5	-	161	1845
ENSDARG00000004232	ENSDART00000019259	5	2	2	CAACTCAAACACACCCGACGAAGCC	7	-	63	1845
ENSDARG00000004232	ENSDART00000019259	5	2	2	TCCTGCAGAAGCGCCGTGTGGTGC	6	-	104	1845
ENSDARG00000004232	ENSDART00000019259	5	2	2	TCCTGCAGAAGCGCCGTGTGGTGCT	7	-	103	1845
ENSDARG00000004232	ENSDART00000019259	5	2	2	GACAAATCCGAAAAAAGATGTTGCA	7	-	139	1845
ENSDARG00000004232	ENSDART00000019259	5	2	2	AACTCAAACACACCCGACGAAGCC	6	-	63	1845
ENSDARG00000004232	ENSDART00000019259	5	4	4	AGCGCCTTCGTGTTGCTAAGCGGCT	7	-	391	1845
ENSDARG00000004232	ENSDART00000019259	5	4	4	CTAAGCGGCTGATCAGGTTGTTTTG	7	-	376	1845
ENSDARG00000004232	ENSDART00000019259	5	5	5	AACTGCCGCCATTCTTGCAGGGGTT	7	-	958	1845
ENSDARG00000004232	ENSDART00000019259	5	5	5	TCCAAATCCCGGCCGGCAGGTGCA	6	-	895	1845
ENSDARG00000004232	ENSDART00000019259	5	5	5	CTCCAAATCCCGGCCGGCAGGTGCA	7	-	895	1845
ENSDARG00000004232	ENSDART00000019259	5	6	6	GTTGGCACATGGTTTGTGGCTAC	5	-	1181	1845
ENSDARG00000004232	ENSDART00000019259	5	7	7	TGCCCAGCAGGGAGCGTGTGAGAT	6	-	1797	1845
ENSDARG00000004232	ENSDART00000019259	5	7	7	GACACCGCCACAGCCGAGGGCGAA	6	-	1557	1845
ENSDARG00000004232	ENSDART00000019259	5	7	7	CGCCACAGCCGAGGGCGAAGTCTGC	7	-	1551	1845
ENSDARG00000004232	ENSDART00000019259	5	7	7	CACCGCCACAGCCGAGGGCGAAGTC	7	-	1554	1845
ENSDARG00000004232	ENSDART00000019259	5	7	7	AGCATCTGCTCGCAGGCTGCAGTT	6	-	1384	1845
ENSDARG00000004232	ENSDART00000019259	5	7	7	ACCGCCACAGCCGAGGGCGAAGTC	6	-	1554	1845
ENSDARG00000004232	ENSDART00000019259	5	7	7	ACAAGCATCTGCTCGCAGGCTGC	5	-	1388	1845
ENSDARG00000004232	ENSDART00000097687	5	1	1	GACAAATCCGAAAAAAGATGTTGCA	7	-	88	1521
ENSDARG00000004232	ENSDART00000097687	5	1	1	CACGTCCTCAGAATGCTTGAGAC	5	-	110	1521
ENSDARG00000004232	ENSDART00000097687	5	1	1	CAACTCAAACACACCCGACGAAGCC	7	-	12	1521
ENSDARG00000004232	ENSDART00000097687	5	1	1	TCCTGCAGAAGCGCCGTGTGGTGC	6	-	53	1521
ENSDARG00000004232	ENSDART00000097687	5	1	1	TCCTGCAGAAGCGCCGTGTGGTGCT	7	-	52	1521
ENSDARG00000004232	ENSDART00000097687	5	1	1	AACTCAAACACACCCGACGAAGCC	6	-	12	1521
ENSDARG00000004232	ENSDART00000097687	5	3	3	AGCGCCTTCGTGTTGCTAAGCGGCT	7	-	340	1521
ENSDARG00000004232	ENSDART00000097687	5	3	3	CTAAGCGGCTGATCAGGTTGTTTTG	7	-	325	1521
ENSDARG00000004232	ENSDART00000097687	5	5	5	TCCAAATCCCGGCCGGCAGGTGCA	6	-	784	1521
ENSDARG00000004232	ENSDART00000097687	5	5	5	AACTGCCGCCATTCTTGCAGGGGTT	7	-	847	1521
ENSDARG00000004232	ENSDART00000097687	5	5	5	CTCCAAATCCCGGCCGGCAGGTGCA	7	-	784	1521
ENSDARG00000004232	ENSDART00000097687	5	6	6	GTTGGCACATGGTTTGTGGCTAC	5	-	1070	1521
ENSDARG00000004232	ENSDART00000097687	5	7	7	CGCCACAGCCGAGGGCGAAGTCTGC	7	-	1440	1521
ENSDARG00000004232	ENSDART00000097687	5	7	7	ACAAGCATCTGCTCGCAGGCTGC	5	-	1277	1521
ENSDARG00000004232	ENSDART00000097687	5	7	7	ACCGCCACAGCCGAGGGCGAAGTC	6	-	1443	1521
ENSDARG00000004232	ENSDART00000097687	5	7	7	AGCATCTGCTCGCAGGCTGCAGTT	6	-	1273	1521
ENSDARG00000004232	ENSDART00000097687	5	7	7	CACCGCCACAGCCGAGGGCGAAGTC	7	-	1443	1521
ENSDARG00000004232	ENSDART00000097687	5	7	7	GACACCGCCACAGCCGAGGGCGAA	6	-	1446	1521
ENSDARG00000004251	ENSDART00000010041	5	4	4	ACAGTCAAACTGCTTGAGGATGCG	6	-	427	570
ENSDARG00000004251	ENSDART00000010041	5	4	4	CACTCACTCAGGGAGTAGCTTGT	5	-	485	570
ENSDARG00000004251	ENSDART00000010041	5	5	5	TCCTCCTGCAAGCCGACGGGTAC	5	-	511	570
ENSDARG00000004251	ENSDART00000098497	5	2	2	GTCATCTTCTGAAAGTGCTTGAGTT	7	-	110	573
ENSDARG00000004251	ENSDART00000098497	5	5	5	CACTCACTCAGGGAGTAGCTTGT	5	-	488	573
ENSDARG00000004251	ENSDART00000098497	5	5	5	ACAGTCAAACTGCTTGAGGATGCG	6	-	430	573
ENSDARG00000004251	ENSDART00000098497	5	6	6	TCCTCCTGCAAGCCGACGGGTAC	5	-	514	573
ENSDARG00000004256	ENSDART00000013590	5	2	2	TCCAGCGCATATCACTGAAGGAGCT	7	-	250	1059
ENSDARG00000004256	ENSDART00000013590	5	3	3	GCCAACAGCATTGTTGTGAAGCT	5	-	575	1059
ENSDARG00000004256	ENSDART00000013590	5	5	5	TCCACCAGCACCTCTGTGTAGGCA	6	-	963	1059
ENSDARG00000004256	ENSDART00000013590	5	5	5	TCCACCAGCACCTCTGTGTAGGC	5	-	964	1059
ENSDARG00000004256	ENSDART00000013590	5	5	5	CGCTCCACCAGCACCTCTGTGTAG	6	-	966	1059
ENSDARG00000004392	ENSDART00000005025	5	2	2	TTCCAAGCCTTCCCTGCATGAAAC	6	-	124	1260
ENSDARG00000004392	ENSDART00000005025	5	3	3	ACACACTCCTTTTTCTGCAGCAGCA	7	-	213	1260
ENSDARG00000004392	ENSDART00000005025	5	3	3	TGCAGCAGCAGCACAAGCTTTTTTC	7	-	198	1260
ENSDARG00000004392	ENSDART00000005025	5	8	8	TTCTGCCTCTGATGGATGGGGAA	5	-	773	1260
ENSDARG00000004392	ENSDART00000005025	5	8	8	CTCTCACCAAAGCAGGAGGCTGC	5	-	927	1260
ENSDARG00000004406	ENSDART00000007827	5	1	1	GTCCGCTGCGTCCCGGTGGATTTG	6	+	202	783
ENSDARG00000004406	ENSDART00000007827	5	1	1	GTCCGCTGCGTCCCGGTGGATTT	5	+	202	783
ENSDARG00000004406	ENSDART00000007827	5	1	1	GGCTTCGGCCGAGCTCTGGCTCT	5	+	67	783
ENSDARG00000004406	ENSDART00000007827	5	1	1	CGCTGCGTCCCGGTGGATTTGGGC	6	+	205	783
ENSDARG00000004406	ENSDART00000007827	5	1	1	CGCTGCGTCCCGGTGGATTTGGG	5	+	205	783
ENSDARG00000004406	ENSDART00000007827	5	2	2	CGCGTCCTCGCAGAGGAGGAGCC	5	+	553	783
ENSDARG00000004406	ENSDART00000007827	5	2	2	TTCCGCGTCCTCGCAGAGGAGGAG	6	+	550	783
ENSDARG00000004406	ENSDART00000007827	5	2	2	TGCAGCTTCTCTCGGTGATGTGTCT	7	+	309	783
ENSDARG00000004406	ENSDART00000007827	5	2	2	TCCTGCAGCTTCTCTCGGTGATGTG	7	+	306	783
ENSDARG00000004406	ENSDART00000007827	5	2	2	TCCGCCCTCTGTCTGACGGCGGG	5	+	397	783
ENSDARG00000004406	ENSDART00000007827	5	2	2	GTCCTCGCAGAGGAGGAGCCGGA	5	+	556	783
ENSDARG00000004406	ENSDART00000007827	5	2	2	AACTCATACCTGTCGCTGAATGT	5	+	370	783
ENSDARG00000004406	ENSDART00000007827	5	2	2	AGCTCCGCCCTCTGTCTGACGGC	5	+	394	783
ENSDARG00000004406	ENSDART00000007827	5	3	3	AACACCTTCAGCCAGATGCATGC	5	+	667	783
ENSDARG00000004406	ENSDART00000007827	5	3	3	AGACACAGATATGCAGCGTGAGGC	6	+	612	783
ENSDARG00000004455	ENSDART00000014404	5	2	2	CTCTGCGCCCCATAGCTGCAAAC	5	-	251	1440
ENSDARG00000004455	ENSDART00000014404	5	2	2	CAAACCAAACTGAGAGCTGTTGGT	6	-	232	1440
ENSDARG00000004455	ENSDART00000014404	5	2	2	AAACCAAACTGAGAGCTGTTGGT	5	-	232	1440
ENSDARG00000004455	ENSDART00000014404	5	3	3	AACCTAATCTTTGGTTTGGTGTC	5	-	333	1440
ENSDARG00000004455	ENSDART00000014404	5	3	3	GTAACCTAATCTTTGGTTTGGTGTC	7	-	333	1440
ENSDARG00000004455	ENSDART00000014404	5	3	3	GTAACCTAATCTTTGGTTTGGTG	5	-	335	1440
ENSDARG00000004455	ENSDART00000014404	5	3	3	GTAACCTAATCTTTGGTTTGGTGT	6	-	334	1440
ENSDARG00000004455	ENSDART00000014404	5	7	7	GTCTTCAGATATGTGCTGTTGGT	5	-	628	1440
ENSDARG00000004455	ENSDART00000014404	5	8	8	GTTTTCAGAGGAATCTAAGCGTGT	6	-	832	1440
ENSDARG00000004455	ENSDART00000014404	5	12	12	GGCTGCGTCTGTGTCTCTGGGTTG	6	-	1296	1440
ENSDARG00000004455	ENSDART00000014404	5	12	12	GGCTGCATCTCTGCCGTCGGCTTC	6	-	1242	1440
ENSDARG00000004455	ENSDART00000097587	5	2	2	AAACCAAACTGAGAGCTGTTGGT	5	-	232	1119
ENSDARG00000004455	ENSDART00000097587	5	2	2	CAAACCAAACTGAGAGCTGTTGGT	6	-	232	1119
ENSDARG00000004455	ENSDART00000097587	5	2	2	CTCTGCGCCCCATAGCTGCAAAC	5	-	251	1119
ENSDARG00000004455	ENSDART00000097587	5	3	3	GTAACCTAATCTTTGGTTTGGTGTC	7	-	333	1119
ENSDARG00000004455	ENSDART00000097587	5	3	3	GTAACCTAATCTTTGGTTTGGTGT	6	-	334	1119
ENSDARG00000004455	ENSDART00000097587	5	3	3	GTAACCTAATCTTTGGTTTGGTG	5	-	335	1119
ENSDARG00000004455	ENSDART00000097587	5	3	3	AACCTAATCTTTGGTTTGGTGTC	5	-	333	1119
ENSDARG00000004455	ENSDART00000097587	5	6	6	GTCTTCAGATATGTGCTGTTGGT	5	-	625	1119
ENSDARG00000004455	ENSDART00000097587	5	7	7	GTTTTCAGAGGAATCTAAGCGTGT	6	-	829	1119
ENSDARG00000004568	ENSDART00000011944	5	4	4	TACGTCAACAGTTCCTCTGTGGGA	6	-	348	1887
ENSDARG00000004568	ENSDART00000011944	5	4	4	GCAAACCTCTTGAGGTCGTAGTA	5	-	370	1887
ENSDARG00000004568	ENSDART00000011944	5	6	6	CACCGCTTCTGCGAACTTAGCATAG	7	-	546	1887
ENSDARG00000004568	ENSDART00000011944	5	9	9	AACAGCGGCAGGTGGATGAAAAC	5	-	1003	1887
ENSDARG00000004568	ENSDART00000011944	5	9	9	GGCTGCAGAGCCAACAGCGGCAGGT	7	-	1013	1887
ENSDARG00000004568	ENSDART00000011944	5	9	9	GCCAACAGCGGCAGGTGGATGAA	5	-	1006	1887
ENSDARG00000004568	ENSDART00000011944	5	9	9	AAAGACAGAGCCAGGAAGGTGCA	5	-	1042	1887
ENSDARG00000004568	ENSDART00000011944	5	10	10	GTCACCACAGCTCCGGCGACGGT	5	-	1243	1887
ENSDARG00000004568	ENSDART00000011944	5	10	10	TCCGGCGACGGTCATCTGCTGAC	5	-	1232	1887
ENSDARG00000004568	ENSDART00000011944	5	11	11	CGCAGCACCGACGACAGGATGGGCG	7	-	1304	1887
ENSDARG00000004568	ENSDART00000011944	5	13	13	ATCTCCAACGGTGTTGATGGTGGC	6	-	1615	1887
ENSDARG00000004568	ENSDART00000011944	5	13	13	AAAATCTCCAACGGTGTTGATGGT	6	-	1618	1887
ENSDARG00000004568	ENSDART00000011944	5	13	13	AACAAAATCTCCAACGGTGTTGAT	6	-	1621	1887
ENSDARG00000004568	ENSDART00000011944	5	14	14	GCAAACAGACACACGATGATGAG	5	-	1741	1887
ENSDARG00000004568	ENSDART00000011944	5	14	14	GTCCACCACGATCTCGAAGATGGA	6	-	1789	1887
ENSDARG00000004568	ENSDART00000011944	5	14	14	TTCAGCGCCAGAACGCCGGCGAA	5	-	1684	1887
ENSDARG00000004568	ENSDART00000097215	5	5	5	GCAAACCTCTTGAGGTCGTAGTA	5	-	385	1902
ENSDARG00000004568	ENSDART00000097215	5	5	5	TACGTCAACAGTTCCTCTGTGGGA	6	-	363	1902
ENSDARG00000004568	ENSDART00000097215	5	7	7	CACCGCTTCTGCGAACTTAGCATAG	7	-	561	1902
ENSDARG00000004568	ENSDART00000097215	5	10	10	AAAGACAGAGCCAGGAAGGTGCA	5	-	1057	1902
ENSDARG00000004568	ENSDART00000097215	5	10	10	AACAGCGGCAGGTGGATGAAAAC	5	-	1018	1902
ENSDARG00000004568	ENSDART00000097215	5	10	10	GCCAACAGCGGCAGGTGGATGAA	5	-	1021	1902
ENSDARG00000004568	ENSDART00000097215	5	10	10	GGCTGCAGAGCCAACAGCGGCAGGT	7	-	1028	1902
ENSDARG00000004568	ENSDART00000097215	5	11	11	GTCACCACAGCTCCGGCGACGGT	5	-	1258	1902
ENSDARG00000004568	ENSDART00000097215	5	11	11	TCCGGCGACGGTCATCTGCTGAC	5	-	1247	1902
ENSDARG00000004568	ENSDART00000097215	5	12	12	CGCAGCACCGACGACAGGATGGGCG	7	-	1319	1902
ENSDARG00000004568	ENSDART00000097215	5	14	14	AACAAAATCTCCAACGGTGTTGAT	6	-	1636	1902
ENSDARG00000004568	ENSDART00000097215	5	14	14	AAAATCTCCAACGGTGTTGATGGT	6	-	1633	1902
ENSDARG00000004568	ENSDART00000097215	5	14	14	ATCTCCAACGGTGTTGATGGTGGC	6	-	1630	1902
ENSDARG00000004568	ENSDART00000097215	5	15	15	GTCCACCACGATCTCGAAGATGGA	6	-	1804	1902
ENSDARG00000004568	ENSDART00000097215	5	15	15	GCAAACAGACACACGATGATGAG	5	-	1756	1902
ENSDARG00000004568	ENSDART00000097215	5	15	15	TTCAGCGCCAGAACGCCGGCGAA	5	-	1699	1902
ENSDARG00000004568	ENSDART00000097216	5	3	3	TACGTCAACAGTTCCTCTGTGGGA	6	-	366	1911
ENSDARG00000004568	ENSDART00000097216	5	3	3	GCAAACCTCTTGAGGTCGTAGTA	5	-	388	1911
ENSDARG00000004568	ENSDART00000097216	5	5	5	CACCGCTTCTGCGAACTTAGCATAG	7	-	564	1911
ENSDARG00000004568	ENSDART00000097216	5	9	9	GCCAACAGCGGCAGGTGGATGAA	5	-	991	1911
ENSDARG00000004568	ENSDART00000097216	5	9	9	GGCTGCAGAGCCAACAGCGGCAGGT	7	-	998	1911
ENSDARG00000004568	ENSDART00000097216	5	9	9	AAAGACAGAGCCAGGAAGGTGCA	5	-	1027	1911
ENSDARG00000004568	ENSDART00000097216	5	9	9	AACAGCGGCAGGTGGATGAAAAC	5	-	988	1911
ENSDARG00000004568	ENSDART00000097216	5	10	10	GTCACCACAGCTCCGGCGACGGT	5	-	1228	1911
ENSDARG00000004568	ENSDART00000097216	5	10	10	TCCGGCGACGGTCATCTGCTGAC	5	-	1217	1911
ENSDARG00000004568	ENSDART00000097216	5	11	11	CGCAGCACCGACGACAGGATGGGCG	7	-	1289	1911
ENSDARG00000004568	ENSDART00000097216	5	14	14	ATCTCCAACGGTGTTGATGGTGGC	6	-	1603	1911
ENSDARG00000004568	ENSDART00000097216	5	14	14	AACAAAATCTCCAACGGTGTTGAT	6	-	1609	1911
ENSDARG00000004568	ENSDART00000097216	5	14	14	AAAATCTCCAACGGTGTTGATGGT	6	-	1606	1911
ENSDARG00000004568	ENSDART00000097216	5	15	15	TTCAGCGCCAGAACGCCGGCGAA	5	-	1672	1911
ENSDARG00000004568	ENSDART00000097216	5	15	15	GTCCACCACGATCTCGAAGATGGA	6	-	1777	1911
ENSDARG00000004568	ENSDART00000097216	5	15	15	GCAAACAGACACACGATGATGAG	5	-	1729	1911
ENSDARG00000004587	ENSDART00000006983	5	2	2	GTCGACTTCCAGTATTGCGGAGAA	6	+	44	1623
ENSDARG00000004587	ENSDART00000006983	5	3	3	GTCAAAGACATCTCTGGGAGGAA	5	+	112	1623
ENSDARG00000004587	ENSDART00000006983	5	3	3	AAAGACATCTCTGGGAGGAAGCT	5	+	115	1623
ENSDARG00000004587	ENSDART00000006983	5	4	4	AGCTCACCAGAAAGAGACGTGGTA	6	+	277	1623
ENSDARG00000004587	ENSDART00000006983	5	9	9	GCCGACACAGACTGAAGCCTTGGTA	7	+	806	1623
ENSDARG00000004587	ENSDART00000006983	5	9	9	TTCTGCCCCACGCATGACTGGGAG	6	+	714	1623
ENSDARG00000004587	ENSDART00000006983	5	12	12	ACCACCTTACCAGAGAAGAGGCT	5	+	1212	1623
ENSDARG00000004587	ENSDART00000006983	5	14	14	ACAAGCATCAAGAAAGAAGATGTG	6	+	1435	1623
ENSDARG00000004587	ENSDART00000099128	5	2	2	GTCGACTTCCAGTATTGCGGAGAA	6	+	44	1560
ENSDARG00000004587	ENSDART00000099128	5	3	3	GTCAAAGACATCTCTGGGAGGAA	5	+	112	1560
ENSDARG00000004587	ENSDART00000099128	5	3	3	AAAGACATCTCTGGGAGGAAGCT	5	+	115	1560
ENSDARG00000004587	ENSDART00000099128	5	4	4	AGCTCACCAGAAAGAGACGTGGTA	6	+	277	1560
ENSDARG00000004587	ENSDART00000099128	5	8	8	TTCTGCCCCACGCATGACTGGGAG	6	+	651	1560
ENSDARG00000004587	ENSDART00000099128	5	8	8	GCCGACACAGACTGAAGCCTTGGTA	7	+	743	1560
ENSDARG00000004587	ENSDART00000099128	5	11	11	ACCACCTTACCAGAGAAGAGGCT	5	+	1149	1560
ENSDARG00000004587	ENSDART00000099128	5	13	13	ACAAGCATCAAGAAAGAAGATGTG	6	+	1372	1560
ENSDARG00000004616	ENSDART00000020004	5	2	2	ACCCGCAGCTCTGTGTCTGAAAC	5	-	94	1860
ENSDARG00000004616	ENSDART00000020004	5	6	6	GACGTCTCCTCTGCCTGTTGCTGCT	7	-	357	1860
ENSDARG00000004616	ENSDART00000020004	5	11	11	AGCTCAGCATTCTGATAAGCATCT	6	-	957	1860
ENSDARG00000004616	ENSDART00000020004	5	12	12	GAAAGCCTCGAATGGTTCTGTAGTG	7	-	1249	1860
ENSDARG00000004616	ENSDART00000020004	5	15	15	AACAGCACATGAGAAGAGTAGTGC	6	-	1608	1860
ENSDARG00000004616	ENSDART00000020004	5	16	16	CTCCTCAACTCTCTTCTGAAGCT	5	-	1754	1860
ENSDARG00000004616	ENSDART00000020004	5	16	16	AGAGCCTGCCCTCTCGGAGGATGAG	7	-	1809	1860
ENSDARG00000004616	ENSDART00000020004	5	16	16	GTTTGCACCGGGGTGATGGAGCG	5	-	1840	1860
ENSDARG00000004665	ENSDART00000010079	5	2	1	GCCGGCAGCGTGTTTGCCGAAGAG	6	+	40	1950
ENSDARG00000004665	ENSDART00000010079	5	6	5	GACAACCGCGCCGTGCAGAAGCT	5	+	844	1950
ENSDARG00000004665	ENSDART00000010079	5	6	5	CTCACCAGAGCCAAGTTTGAAGAG	6	+	967	1950
ENSDARG00000004665	ENSDART00000010079	5	6	5	AGCTGCGCAGAGAGGTGGAGAAGGC	7	+	863	1950
ENSDARG00000004665	ENSDART00000010079	5	6	5	AGAAGCTGCGCAGAGAGGTGGAGAA	7	+	860	1950
ENSDARG00000004665	ENSDART00000010079	5	6	5	AGAAGCTGCGCAGAGAGGTGGAG	5	+	860	1950
ENSDARG00000004665	ENSDART00000010079	5	6	5	AACCGCGCCGTGCAGAAGCTGCG	5	+	847	1950
ENSDARG00000004665	ENSDART00000010079	5	7	6	TTCCGCTCCACTATGAAGCCGGT	5	+	1006	1950
ENSDARG00000004665	ENSDART00000010079	5	7	6	GAATCAACCCTGACGAGGCCGTG	5	+	1163	1950
ENSDARG00000004665	ENSDART00000010079	5	9	8	GGCCAAAAAGAAGGAGCTGGAGGA	6	+	1854	1950
ENSDARG00000004665	ENSDART00000010079	5	9	8	GACCACCGCCTGAAGAGGCCGAA	5	+	1922	1950
ENSDARG00000004665	ENSDART00000010079	5	9	8	GACCAAAGACAACCATCTGCTGGG	6	+	1419	1950
ENSDARG00000004665	ENSDART00000010079	5	9	8	ACCAAAGACAACCATCTGCTGGG	5	+	1420	1950
ENSDARG00000004665	ENSDART00000010079	5	9	8	ACCAAAGACAACCATCTGCTGGGCA	7	+	1420	1950
ENSDARG00000004665	ENSDART00000010079	5	9	8	ATCGACAGCCGCAATGAATTGGAG	6	+	1678	1950
ENSDARG00000004665	ENSDART00000010079	5	9	8	ACCACCGCCTGAAGAGGCCGAAGAG	7	+	1923	1950
ENSDARG00000004722	ENSDART00000049466	5	2	2	CTCATCTTCCTCACCGTTGTTGCC	6	+	151	2412
ENSDARG00000004722	ENSDART00000049466	5	2	2	CGCTTCGGCAATGAGGTGCTGTA	5	+	274	2412
ENSDARG00000004722	ENSDART00000049466	5	3	3	AACACCTACGACACTGTGGTGCG	5	+	307	2412
ENSDARG00000004722	ENSDART00000049466	5	5	5	TTCACCTCCATGAAGGTGAGGAC	5	+	715	2412
ENSDARG00000004722	ENSDART00000049466	5	5	5	AACTTCACCTCCATGAAGGTGAG	5	+	712	2412
ENSDARG00000004722	ENSDART00000049466	5	6	6	GGCCACAGCTCTGCGCTGCCGCT	5	+	903	2412
ENSDARG00000004722	ENSDART00000049466	5	7	7	TGCAAAGTCCTGGAGAAGGTGTG	5	+	1108	2412
ENSDARG00000004722	ENSDART00000049466	5	8	8	CTCCAAGGCGTATTTTGGAGGAGGA	7	+	1127	2412
ENSDARG00000004722	ENSDART00000049466	5	8	8	TCCATCGACCCTCCGTATGAGAG	5	+	1222	2412
ENSDARG00000004722	ENSDART00000049466	5	9	9	TTCTCAGCCTGTAGTGGAGGATAC	6	+	1324	2412
ENSDARG00000004722	ENSDART00000049466	5	9	9	GACATCATCAGCCTGCAGGGTGT	5	+	1420	2412
ENSDARG00000004722	ENSDART00000049466	5	9	9	GTTCTCAGCCTGTAGTGGAGGAT	5	+	1323	2412
ENSDARG00000004722	ENSDART00000049466	5	9	9	GTTCTCAGCCTGTAGTGGAGGATAC	7	+	1323	2412
ENSDARG00000004722	ENSDART00000049466	5	11	11	ACATCATTCAGCTGCTGTGTGTTT	6	+	1754	2412
ENSDARG00000004722	ENSDART00000049466	5	13	13	CACCACTGCTAGTGACGTGTGGGCA	7	+	2145	2412
ENSDARG00000004722	ENSDART00000049466	5	13	13	CCCTACAGCCTGCTGTCTGATGAA	6	+	2215	2412
ENSDARG00000004722	ENSDART00000049466	5	14	14	TCCTCCCTCTTCAAGCTGATGAT	5	+	2317	2412
ENSDARG00000004722	ENSDART00000049466	5	14	14	TCCCTCTTCAAGCTGATGATGCG	5	+	2320	2412
ENSDARG00000004722	ENSDART00000097218	5	2	2	CTCATCTTCCTCACCGTTGTTGCC	6	+	151	2412
ENSDARG00000004722	ENSDART00000097218	5	2	2	CGCTTCGGCAATGAGGTGCTGTA	5	+	274	2412
ENSDARG00000004722	ENSDART00000097218	5	3	3	AACACCTACGACACTGTGGTGCG	5	+	307	2412
ENSDARG00000004722	ENSDART00000097218	5	5	5	TTCACCTCCATGAAGGTGAGGAC	5	+	715	2412
ENSDARG00000004722	ENSDART00000097218	5	5	5	AACTTCACCTCCATGAAGGTGAG	5	+	712	2412
ENSDARG00000004722	ENSDART00000097218	5	6	6	GGCCACAGCTCTGCGCTGCCGCT	5	+	903	2412
ENSDARG00000004722	ENSDART00000097218	5	7	7	TGCAAAGTCCTGGAGAAGGTGTG	5	+	1108	2412
ENSDARG00000004722	ENSDART00000097218	5	8	8	CTCCAAGGCGTATTTTGGAGGAGGA	7	+	1127	2412
ENSDARG00000004722	ENSDART00000097218	5	8	8	TCCATCGACCCTCCGTATGAGAG	5	+	1222	2412
ENSDARG00000004722	ENSDART00000097218	5	10	10	GACATCATCAGCCTGCAGGGTGT	5	+	1420	2412
ENSDARG00000004722	ENSDART00000097218	5	12	12	ACATCATTCAGCTGCTGTGTGTTT	6	+	1754	2412
ENSDARG00000004722	ENSDART00000097218	5	14	14	CCCTACAGCCTGCTGTCTGATGAA	6	+	2215	2412
ENSDARG00000004722	ENSDART00000097218	5	14	14	CACCACTGCTAGTGACGTGTGGGCA	7	+	2145	2412
ENSDARG00000004722	ENSDART00000097218	5	15	15	TCCCTCTTCAAGCTGATGATGCG	5	+	2320	2412
ENSDARG00000004722	ENSDART00000097218	5	15	15	TCCTCCCTCTTCAAGCTGATGAT	5	+	2317	2412
ENSDARG00000004774	ENSDART00000014049	5	3	3	AGCAAAAGCGGAGATAAGTTTTC	5	-	266	2700
ENSDARG00000004774	ENSDART00000014049	5	5	5	GAAATCTGCAGATATGTGTCTGT	5	-	415	2700
ENSDARG00000004774	ENSDART00000014049	5	5	5	GACTGCTTCCAAACAGGATTTTGTT	7	-	493	2700
ENSDARG00000004774	ENSDART00000014049	5	5	5	GACTGCTTCCAAACAGGATTTTGT	6	-	494	2700
ENSDARG00000004774	ENSDART00000014049	5	7	7	ACCTACAACATCCACAGCTGGGGTC	7	-	606	2700
ENSDARG00000004774	ENSDART00000014049	5	9	9	CCCATCCTCTGTCTGAGCAGACGAC	7	-	947	2700
ENSDARG00000004774	ENSDART00000014049	5	12	12	GCCATCCCAGTCACTCTGACGTG	5	-	1205	2700
ENSDARG00000004774	ENSDART00000014049	5	18	18	AACTGCACAGCGTGTTATTGGAC	5	-	1932	2700
ENSDARG00000004774	ENSDART00000014049	5	18	18	ACAGTCGGCTCATAGTCTGCAGGT	6	-	1974	2700
ENSDARG00000004774	ENSDART00000014049	5	20	20	GCACCAGCCCTGGAATGGTGGGAA	6	-	2231	2700
ENSDARG00000004774	ENSDART00000014049	5	20	20	GGCACCAGCCCTGGAATGGTGGGAA	7	-	2231	2700
ENSDARG00000004774	ENSDART00000014049	5	21	21	TGCCAATACTCCTAAGTTGACAAC	6	-	2299	2700
ENSDARG00000004774	ENSDART00000014049	5	21	21	TTCTCAAGCTCAATGTAGAAGTT	5	-	2332	2700
ENSDARG00000004774	ENSDART00000014049	5	22	22	AACATCTCCACCCATATCTGGAGAC	7	-	2442	2700
ENSDARG00000004774	ENSDART00000014049	5	23	23	CACGTCTCCTCCAGCTGCGCAGAC	6	-	2619	2700
ENSDARG00000004798	ENSDART00000022903	5	2	1	ACACGCTCCTCAATGCTTTGGAC	5	-	208	1059
ENSDARG00000004798	ENSDART00000022903	5	2	1	TTCCCCTTCCTGATGATCTTGAGCA	7	-	29	1059
ENSDARG00000004798	ENSDART00000022903	5	5	4	TCCACCCCAGCCCCAGTAGGAGTT	6	-	778	1059
ENSDARG00000004798	ENSDART00000022903	5	5	4	CTCCACCCCAGCCCCAGTAGGAGTT	7	-	778	1059
ENSDARG00000004798	ENSDART00000022903	5	5	4	CCCAGCCCCAGTAGGAGTTTGGA	5	-	774	1059
ENSDARG00000004798	ENSDART00000022903	5	5	4	ACCCCAGCCCCAGTAGGAGTTTGGA	7	-	774	1059
ENSDARG00000004798	ENSDART00000022903	5	6	5	CGCCACTTCAGGCGGCGGCCGCA	5	-	851	1059
ENSDARG00000004830	ENSDART00000003947	5	3	3	TGCAACCCAAGTGTGAGGATGTA	5	+	164	1284
ENSDARG00000004830	ENSDART00000003947	5	3	3	CCCTGCAACCCAAGTGTGAGGAT	5	+	161	1284
ENSDARG00000004830	ENSDART00000003947	5	5	5	GGCAGCACCTGACGTGGGCAGGA	5	+	420	1284
ENSDARG00000004830	ENSDART00000003947	5	6	6	GGCAAATCCCAGACTGCAGCTGTT	6	+	511	1284
ENSDARG00000004830	ENSDART00000003947	5	7	7	GCAGACTCCAAGAGGGAGCTGGA	5	+	646	1284
ENSDARG00000004830	ENSDART00000003947	5	8	8	GAAGCCTTCAAGATGGAGCAGCT	5	+	886	1284
ENSDARG00000004830	ENSDART00000003947	5	8	8	AGCAGCAGAAGATCCGTCTGGAGGA	7	+	752	1284
ENSDARG00000004830	ENSDART00000003947	5	9	9	ATCAAACGCATTGGAGAAGCAGAG	6	+	964	1284
ENSDARG00000004830	ENSDART00000003947	5	9	9	AAATCAAACGCATTGGAGAAGCA	5	+	962	1284
ENSDARG00000004830	ENSDART00000003947	5	9	9	GTTGACGGCACAGGCTGAAGCAGAG	7	+	936	1284
ENSDARG00000004830	ENSDART00000003947	5	9	9	AAAATCAAACGCATTGGAGAAGCA	6	+	961	1284
ENSDARG00000004851	ENSDART00000015090	5	2	1	GACTTCTGCCAGCATGTGGAGAA	5	+	109	1467
ENSDARG00000004851	ENSDART00000015090	5	2	1	CCCGTCAGCCAAACGAGGCCTGC	5	+	15	1467
ENSDARG00000004851	ENSDART00000015090	5	2	1	GCCTGCGCAGAGAGGAGCTGCAGAT	7	+	32	1467
ENSDARG00000004851	ENSDART00000015090	5	3	2	GGCTTCTGCTCAGTGGAAGGAGAT	6	+	205	1467
ENSDARG00000004851	ENSDART00000015090	5	3	2	TGCTACCACACCAAGTTGAAGCA	5	+	259	1467
ENSDARG00000004851	ENSDART00000015090	5	3	2	AGCCACAGCGACATGGGTGCCTGC	6	+	304	1467
ENSDARG00000004851	ENSDART00000015090	5	4	3	GCACGCCCAATGTCTAGAGGCCAAC	7	+	447	1467
ENSDARG00000004851	ENSDART00000015090	5	10	9	CCCAACAGCTGGGCATGGAGGTGGT	7	+	1451	1467
ENSDARG00000004851	ENSDART00000015090	5	10	9	AGCAAAATCAAGGAAGGATGAAAC	6	+	1308	1467
ENSDARG00000004851	ENSDART00000051414	5	1	1	GCCTGCGCAGAGAGGAGCTGCAGAT	7	+	32	1467
ENSDARG00000004851	ENSDART00000051414	5	1	1	GACTTCTGCCAGCATGTGGAGAA	5	+	109	1467
ENSDARG00000004851	ENSDART00000051414	5	1	1	CCCGTCAGCCAAACGAGGCCTGC	5	+	15	1467
ENSDARG00000004851	ENSDART00000051414	5	2	2	GGCTTCTGCTCAGTGGAAGGAGAT	6	+	205	1467
ENSDARG00000004851	ENSDART00000051414	5	2	2	TGCTACCACACCAAGTTGAAGCA	5	+	259	1467
ENSDARG00000004851	ENSDART00000051414	5	2	2	AGCCACAGCGACATGGGTGCCTGC	6	+	304	1467
ENSDARG00000004851	ENSDART00000051414	5	3	3	GCACGCCCAATGTCTAGAGGCCAAC	7	+	447	1467
ENSDARG00000004851	ENSDART00000051414	5	9	9	AGCAAAATCAAGGAAGGATGAAAC	6	+	1308	1467
ENSDARG00000004851	ENSDART00000051414	5	9	9	CCCAACAGCTGGGCATGGAGGTGGT	7	+	1451	1467
ENSDARG00000004864	ENSDART00000019561	5	2	2	GACTGCCGCTGCGGCTGCTGCTGAG	7	-	145	423
ENSDARG00000004864	ENSDART00000019561	5	2	2	TGCCGCTGCGGCTGCTGCTGAGGGC	7	-	142	423
ENSDARG00000004864	ENSDART00000019561	5	2	2	TGCCGCTGCGGCTGCTGCTGAGGG	6	-	143	423
ENSDARG00000004864	ENSDART00000019561	5	3	3	TTCTTCCACCCATCCGGAGCAGTC	6	-	222	423
ENSDARG00000004864	ENSDART00000019561	5	3	3	TCCATCTCCAGAGACCTGCTGAGGT	7	-	291	423
ENSDARG00000004864	ENSDART00000019561	5	3	3	GCAGTCAGAAAAAAGGGGAAGTG	5	-	205	423
ENSDARG00000004864	ENSDART00000019561	5	3	3	ATCTCCAGAGACCTGCTGAGGTG	5	-	290	423
ENSDARG00000005104	ENSDART00000020532	5	1	1	CACTACTGCGAGAAGTTTGGGGA	5	+	115	1749
ENSDARG00000005104	ENSDART00000020532	5	1	1	CACTACTGCGAGAAGTTTGGGGAA	6	+	115	1749
ENSDARG00000005104	ENSDART00000020532	5	2	2	AGAGACACCTATGCCTTAGTGGAA	6	+	250	1749
ENSDARG00000005104	ENSDART00000020532	5	2	2	TACCACCCCGAATGCTTTGTGTGT	6	+	199	1749
ENSDARG00000005104	ENSDART00000020532	5	2	2	AAATACCACCCCGAATGCTTTGTGT	7	+	196	1749
ENSDARG00000005104	ENSDART00000020532	5	2	2	AAATACCACCCCGAATGCTTTGTG	6	+	196	1749
ENSDARG00000005104	ENSDART00000020532	5	3	3	CCCTCACACAGTGACTCTGGTGTC	6	+	375	1749
ENSDARG00000005104	ENSDART00000020532	5	3	3	TCCCTCACACAGTGACTCTGGTGTC	7	+	374	1749
ENSDARG00000005104	ENSDART00000020532	5	8	8	GACCCATAAAGCCACTGGTGAGGTG	7	+	954	1749
ENSDARG00000005104	ENSDART00000020532	5	8	8	GACCCATAAAGCCACTGGTGAGGT	6	+	954	1749
ENSDARG00000005104	ENSDART00000020532	5	12	12	GACAACACCGTCGTGGTGGCAGAT	6	+	1294	1749
ENSDARG00000005104	ENSDART00000020532	5	12	12	AACACCGTCGTGGTGGCAGATTTT	6	+	1297	1749
ENSDARG00000005104	ENSDART00000020532	5	13	13	AGAAAAGGCTGTTTAGACGCATTG	6	+	1349	1749
ENSDARG00000005104	ENSDART00000020532	5	13	13	AAACGCTACACGGTGGTGGGGAAC	6	+	1381	1749
ENSDARG00000005104	ENSDART00000020532	5	13	13	AAACGCTACACGGTGGTGGGGAA	5	+	1381	1749
ENSDARG00000005104	ENSDART00000020532	5	14	14	AAACGCTACGACGAGAAGGTGGA	5	+	1438	1749
ENSDARG00000005104	ENSDART00000020532	5	15	15	TCCTCCTGCTTTCTTTGCATTGGCT	7	+	1593	1749
ENSDARG00000005104	ENSDART00000093185	5	3	3	CACTACTGCGAGAAGTTTGGGGAA	6	+	193	1953
ENSDARG00000005104	ENSDART00000093185	5	3	3	CACTACTGCGAGAAGTTTGGGGA	5	+	193	1953
ENSDARG00000005104	ENSDART00000093185	5	4	4	AAATACCACCCCGAATGCTTTGTG	6	+	274	1953
ENSDARG00000005104	ENSDART00000093185	5	4	4	AAATACCACCCCGAATGCTTTGTGT	7	+	274	1953
ENSDARG00000005104	ENSDART00000093185	5	4	4	AGAGACACCTATGCCTTAGTGGAA	6	+	328	1953
ENSDARG00000005104	ENSDART00000093185	5	4	4	TACCACCCCGAATGCTTTGTGTGT	6	+	277	1953
ENSDARG00000005104	ENSDART00000093185	5	5	5	CCCTCACACAGTGACTCTGGTGTC	6	+	447	1953
ENSDARG00000005104	ENSDART00000093185	5	5	5	TCCCTCACACAGTGACTCTGGTGTC	7	+	446	1953
ENSDARG00000005104	ENSDART00000093185	5	7	7	TCCTCACCAGTAGATGCTGAGAT	5	+	808	1953
ENSDARG00000005104	ENSDART00000093185	5	7	7	CTCCTCACCAGTAGATGCTGAGAT	6	+	807	1953
ENSDARG00000005104	ENSDART00000093185	5	7	7	AGACTCTCCTCACCAGTAGATGCT	6	+	802	1953
ENSDARG00000005104	ENSDART00000093185	5	9	9	GACCCATAAAGCCACTGGTGAGGT	6	+	1071	1953
ENSDARG00000005104	ENSDART00000093185	5	9	9	GACCCATAAAGCCACTGGTGAGGTG	7	+	1071	1953
ENSDARG00000005104	ENSDART00000093185	5	13	13	AAACGCTACACGGTGGTGGGGAA	5	+	1534	1953
ENSDARG00000005104	ENSDART00000093185	5	13	13	AGAAAAGGCTGTTTAGACGCATTG	6	+	1502	1953
ENSDARG00000005104	ENSDART00000093185	5	13	13	AACACCGTCGTGGTGGCAGATTTT	6	+	1414	1953
ENSDARG00000005104	ENSDART00000093185	5	13	13	AAACGCTACACGGTGGTGGGGAAC	6	+	1534	1953
ENSDARG00000005104	ENSDART00000093185	5	13	13	GACAACACCGTCGTGGTGGCAGAT	6	+	1411	1953
ENSDARG00000005104	ENSDART00000093185	5	14	14	AAACGCTACGACGAGAAGGTGGA	5	+	1591	1953
ENSDARG00000005104	ENSDART00000093185	5	15	15	TCCTCCTGCTTTCTTTGCATTGGCT	7	+	1746	1953
ENSDARG00000005104	ENSDART00000098675	5	3	3	CACTACTGCGAGAAGTTTGGGGAA	6	+	193	657
ENSDARG00000005104	ENSDART00000098675	5	3	3	CACTACTGCGAGAAGTTTGGGGA	5	+	193	657
ENSDARG00000005104	ENSDART00000098675	5	4	4	GCCATCAAAGCGAATGCATTGGAT	6	+	261	657
ENSDARG00000005104	ENSDART00000098675	5	5	5	TACCACCCCGAATGCTTTGTGTGT	6	+	307	657
ENSDARG00000005104	ENSDART00000098675	5	5	5	AGAGACACCTATGCCTTAGTGGAA	6	+	358	657
ENSDARG00000005104	ENSDART00000098675	5	5	5	AAATACCACCCCGAATGCTTTGTGT	7	+	304	657
ENSDARG00000005104	ENSDART00000098675	5	5	5	AAATACCACCCCGAATGCTTTGTG	6	+	304	657
ENSDARG00000005104	ENSDART00000098675	5	6	6	CCCTCACACAGTGACTCTGGTGTC	6	+	477	657
ENSDARG00000005104	ENSDART00000098675	5	6	6	TCCCTCACACAGTGACTCTGGTGTC	7	+	476	657
ENSDARG00000005154	ENSDART00000074117	5	1	1	TGCACCATCTGAAGGTTGAAGAG	5	-	160	690
ENSDARG00000005154	ENSDART00000074117	5	2	2	GTACTCACCGACAGGGTGTTTGGCC	7	-	270	690
ENSDARG00000005154	ENSDART00000074117	5	2	2	GTACTCACCGACAGGGTGTTTGGC	6	-	271	690
ENSDARG00000005154	ENSDART00000074117	5	3	3	TCCTCAAAACCCCCTGTGGTTGTG	6	-	302	690
ENSDARG00000005154	ENSDART00000074117	5	3	3	CTCCTCAAAACCCCCTGTGGTTGTG	7	-	302	690
ENSDARG00000005154	ENSDART00000074117	5	3	3	CTCCTCAAAACCCCCTGTGGTTGT	6	-	303	690
ENSDARG00000005154	ENSDART00000074117	5	3	3	CTCAAAACCCCCTGTGGTTGTGGGC	7	-	299	690
ENSDARG00000005154	ENSDART00000074117	5	3	3	CAAAACCCCCTGTGGTTGTGGGC	5	-	299	690
ENSDARG00000005154	ENSDART00000074117	5	3	3	TCCTCAAAACCCCCTGTGGTTGT	5	-	303	690
ENSDARG00000005154	ENSDART00000074117	5	5	5	GGCACCTTCATAAAGAATTGTTC	5	-	563	690
ENSDARG00000005154	ENSDART00000074117	5	5	5	GCCTGCTGCTTCTCATAATAGGCC	6	-	618	690
ENSDARG00000005257	ENSDART00000027250	5	1	1	TCCCAAAGCGAAGACAGTGGTGGCA	7	-	123	828
ENSDARG00000005257	ENSDART00000027250	5	2	2	TTCAGCTGCTCGCGGCAGGTTTT	5	-	619	828
ENSDARG00000005257	ENSDART00000027250	5	2	2	GCCACCAAATGCAGCAGCAGTGTAA	7	-	567	828
ENSDARG00000005257	ENSDART00000027250	5	2	2	GACAGCAGCTTAGTGGGTTTGTTG	6	-	711	828
ENSDARG00000005257	ENSDART00000027250	5	2	2	GACAGCAGCTTAGTGGGTTTGTT	5	-	712	828
ENSDARG00000005257	ENSDART00000027250	5	2	2	CAAGGCAGAATATATAGTTGGCTTC	7	-	382	828
ENSDARG00000005257	ENSDART00000027250	5	2	2	AGCAGCTTAGTGGGTTTGTTGTA	5	-	709	828
ENSDARG00000005257	ENSDART00000099101	5	2	2	TCCCAAAGCGAAGACAGTGGTGGCA	7	-	132	831
ENSDARG00000005257	ENSDART00000099101	5	3	3	TTCAGCTGCTCGCGGCAGGTTTT	5	-	628	831
ENSDARG00000005257	ENSDART00000099101	5	3	3	GCCACCAAATGCAGCAGCAGTGTAA	7	-	576	831
ENSDARG00000005257	ENSDART00000099101	5	3	3	GACAGCAGCTTAGTGGGTTTGTTG	6	-	720	831
ENSDARG00000005257	ENSDART00000099101	5	3	3	GACAGCAGCTTAGTGGGTTTGTT	5	-	721	831
ENSDARG00000005257	ENSDART00000099101	5	3	3	CAAGGCAGAATATATAGTTGGCTTC	7	-	391	831
ENSDARG00000005257	ENSDART00000099101	5	3	3	AGCAGCTTAGTGGGTTTGTTGTA	5	-	718	831
ENSDARG00000005320	ENSDART00000026749	5	1	1	AAATGCTGCTGTGTGTTGAGGAG	5	-	34	834
ENSDARG00000005320	ENSDART00000026749	5	1	1	AGCTGCAGAGGTCGTGCGGTAGCC	6	-	12	834
ENSDARG00000005320	ENSDART00000026749	5	2	2	TTATTCGCAAAACCTCTGAGGAT	5	-	82	834
ENSDARG00000005320	ENSDART00000026749	5	6	6	CTAAACTCCAGAAGCAGCTGGTTGC	7	-	479	834
ENSDARG00000005320	ENSDART00000026749	5	6	6	AGAAACTAAACTCCAGAAGCAGCT	6	-	485	834
ENSDARG00000005320	ENSDART00000026749	5	6	6	AAACTAAACTCCAGAAGCAGCTGGT	7	-	482	834
ENSDARG00000005320	ENSDART00000026749	5	8	8	CAAATCTCCGATCTGTGTGAAGAA	6	-	652	834
ENSDARG00000005320	ENSDART00000026749	5	10	10	GACTCCATCTTTTGGATTAGGGG	5	-	784	834
ENSDARG00000005320	ENSDART00000026749	5	10	10	GACTCCATCTTTTGGATTAGGGGCA	7	-	782	834
ENSDARG00000005372	ENSDART00000031579	5	6	5	AGCCGCATCTCGTTCGCTGTAGTA	6	-	361	1092
ENSDARG00000005372	ENSDART00000031579	5	9	8	CCCCGCAGAATCTCTGGAGCTGAA	6	-	579	1092
ENSDARG00000005372	ENSDART00000031579	5	9	8	ATCCCCGCAGAATCTCTGGAGCT	5	-	582	1092
ENSDARG00000005372	ENSDART00000031579	5	11	10	TGCTGCAGCGCCTGCTGTGTTGTC	6	-	825	1092
ENSDARG00000005372	ENSDART00000031579	5	12	11	CCCTCATTCTGAATCTGAGGCTGTT	7	-	1073	1092
ENSDARG00000005561	ENSDART00000016314	5	1	1	AACGTCAGACTTAAAAGCATTTTGC	7	-	5	2286
ENSDARG00000005561	ENSDART00000016314	5	4	4	AGCATCCTCTCAGTGGTGGTGGTT	6	-	216	2286
ENSDARG00000005561	ENSDART00000016314	5	4	4	AGCATCCTCTCAGTGGTGGTGGT	5	-	217	2286
ENSDARG00000005561	ENSDART00000016314	5	5	5	AACAGCAGCTGACTGGATGGTGAT	6	-	328	2286
ENSDARG00000005561	ENSDART00000016314	5	7	7	GCCGCCACACAGTCATGGTTTGAG	6	-	488	2286
ENSDARG00000005561	ENSDART00000016314	5	7	7	TGCATCACCTAGCTGCAGGTTTG	5	-	561	2286
ENSDARG00000005561	ENSDART00000016314	5	7	7	GCACACACAAGGAATTTGATGTT	5	-	521	2286
ENSDARG00000005561	ENSDART00000016314	5	7	7	TGCCGCCACACAGTCATGGTTTGAG	7	-	488	2286
ENSDARG00000005561	ENSDART00000016314	5	7	7	CGCCACACAGTCATGGTTTGAGCC	6	-	486	2286
ENSDARG00000005561	ENSDART00000016314	5	9	9	CTCTTCCCAGAGCCAATGGGAATCT	7	-	635	2286
ENSDARG00000005561	ENSDART00000016314	5	12	12	GTTTCATTCCTGTTGATGTTGTG	5	-	1171	2286
ENSDARG00000005561	ENSDART00000016314	5	13	13	TCCTGCAGACAACGATGGGATTTC	6	-	1240	2286
ENSDARG00000005561	ENSDART00000016314	5	14	14	CGCTGCTGCAGATGCTTTGGAGGA	6	-	1318	2286
ENSDARG00000005561	ENSDART00000016314	5	14	14	TGCCGCTGCTGCAGATGCTTTGGA	6	-	1321	2286
ENSDARG00000005561	ENSDART00000016314	5	14	14	TGCCGCTGCTGCAGATGCTTTGGAG	7	-	1320	2286
ENSDARG00000005561	ENSDART00000016314	5	15	15	TCCCTCTGCAGGCAGTTGAGTGC	5	-	1483	2286
ENSDARG00000005561	ENSDART00000016314	5	15	15	CTATTCTAACTTTCAGACTGGGGT	6	-	1508	2286
ENSDARG00000005561	ENSDART00000016314	5	18	18	GCCGACACCATGGCTGCAGATGTG	6	-	1938	2286
ENSDARG00000005561	ENSDART00000016314	5	18	18	CAAGCCGACACCATGGCTGCAGAT	6	-	1941	2286
ENSDARG00000005561	ENSDART00000016314	5	20	20	AGCTCCAAAGAAAAGGTGGCATTT	6	-	2205	2286
ENSDARG00000005586	ENSDART00000013605	5	2	1	GCAGGCCCAACCCCGAGCAGCTGGA	7	-	538	2061
ENSDARG00000005586	ENSDART00000013605	5	2	1	GGCCACAAACTGCGGCTGCTGGC	5	-	1325	2061
ENSDARG00000005586	ENSDART00000013605	5	2	1	GTAAGCGGCTCACCTGGCCGCAGGT	7	-	1154	2061
ENSDARG00000005586	ENSDART00000013605	5	2	1	TGCTCCTGCTTGATGTGGATGTC	5	-	778	2061
ENSDARG00000005586	ENSDART00000013605	5	2	1	TTCCCATTACCTGGGAGTTGCTGGT	7	-	1207	2061
ENSDARG00000005586	ENSDART00000013605	5	2	1	GACGGCCACAAACTGCGGCTGCT	5	-	1328	2061
ENSDARG00000005586	ENSDART00000013605	5	2	1	CGCAGCGCCGGCATAGTGGGAGCG	6	-	583	2061
ENSDARG00000005586	ENSDART00000013605	5	2	1	CCCGGCCTCCTTCTGCTGCAGTG	5	-	635	2061
ENSDARG00000005586	ENSDART00000013605	5	3	2	CCCCGCTTCCGGTGCTGTGCAGGG	6	-	1769	2061
ENSDARG00000005586	ENSDART00000013605	5	3	2	ATCGGCACAGGGATGGACGCGGGG	6	-	1836	2061
ENSDARG00000005586	ENSDART00000013605	5	3	2	AGATACTGCACTGGTGTGGCTTTT	6	-	1532	2061
ENSDARG00000005586	ENSDART00000013605	5	3	2	AGATACTGCACTGGTGTGGCTTT	5	-	1533	2061
ENSDARG00000005586	ENSDART00000013605	5	3	2	AGAGACCCCGCTTCCGGTGCTGTG	6	-	1774	2061
ENSDARG00000005600	ENSDART00000027129	5	2	2	GTCCACTTCATTAGTGTCGCTGCA	6	-	304	729
ENSDARG00000005600	ENSDART00000027129	5	3	3	CACTGCTCCAGCGGTTGGGGAAGGA	7	-	586	729
ENSDARG00000005600	ENSDART00000027129	5	3	3	TGCTCCAGCGGTTGGGGAAGGAGGG	7	-	583	729
ENSDARG00000005642	ENSDART00000027353	5	1	1	TGCATCTCCCTCATAAGGCGGTGTT	7	+	59	1791
ENSDARG00000005642	ENSDART00000027353	5	1	1	TCCTGCATCTCCCTCATAAGGCGGT	7	+	56	1791
ENSDARG00000005642	ENSDART00000027353	5	1	1	CCCTCATAAGGCGGTGTTGAGCG	5	+	66	1791
ENSDARG00000005642	ENSDART00000027353	5	1	1	ATCTCCCTCATAAGGCGGTGTTGAG	7	+	62	1791
ENSDARG00000005642	ENSDART00000027353	5	1	1	ATCTCCCTCATAAGGCGGTGTTG	5	+	62	1791
ENSDARG00000005642	ENSDART00000027353	5	2	2	GACTGCATCCCCTGTGTAGAGGTT	6	+	235	1791
ENSDARG00000005642	ENSDART00000027353	5	4	4	GTAGACAACTACACTCTGCTGTC	5	+	535	1791
ENSDARG00000005642	ENSDART00000027353	5	4	4	AGACTCACCTTATTTCTGGTAAC	5	+	605	1791
ENSDARG00000005642	ENSDART00000027353	5	4	4	ACACTCTGCTGTCCCGTGTGAGAA	6	+	545	1791
ENSDARG00000005642	ENSDART00000027353	5	5	5	AGCACCATCCGCACTGTGATGGT	5	+	751	1791
ENSDARG00000005642	ENSDART00000027353	5	5	5	AAATACAGACAGTGAAGAGGAGGGT	7	+	873	1791
ENSDARG00000005642	ENSDART00000027353	5	5	5	ACCATCCGCACTGTGATGGTGGC	5	+	754	1791
ENSDARG00000005642	ENSDART00000027353	5	5	5	GCACCATCCGCACTGTGATGGTGGC	7	+	752	1791
ENSDARG00000005642	ENSDART00000027353	5	5	5	AGCTCAGGCCCAGCGGACGCAGCA	6	+	822	1791
ENSDARG00000005642	ENSDART00000027353	5	6	6	TCCTTCAAATGTTGGAGAAGGAGAG	7	+	1089	1791
ENSDARG00000005642	ENSDART00000027353	5	6	6	GTCTCCTTCAAATGTTGGAGAAGGA	7	+	1086	1791
ENSDARG00000005642	ENSDART00000027353	5	7	7	CACATCATCGGCATGGGGCTGTC	5	+	1285	1791
ENSDARG00000005642	ENSDART00000027353	5	7	7	GGCCACATCATCGGCATGGGGCTGT	7	+	1282	1791
ENSDARG00000005642	ENSDART00000027353	5	7	7	CACGGCCACATCATCGGCATGGGGC	7	+	1279	1791
ENSDARG00000005642	ENSDART00000027353	5	8	8	GCCTTCACACCAAATGATGAGTGT	6	+	1468	1791
ENSDARG00000005642	ENSDART00000027353	5	8	8	CCCCTCCACCAATCGCAGAGGAG	5	+	1379	1791
ENSDARG00000005642	ENSDART00000027353	5	8	8	GTCCCCTCCACCAATCGCAGAGGAG	7	+	1377	1791
ENSDARG00000005642	ENSDART00000027353	5	9	9	GCCTGCAACACGATGACGTGGTC	5	+	1592	1791
ENSDARG00000005642	ENSDART00000027353	5	9	9	CGCGCCTGCAACACGATGACGTG	5	+	1589	1791
ENSDARG00000005642	ENSDART00000027353	5	9	9	TCCAGCAGACCAGGAGCTGCTGCT	6	+	1632	1791
ENSDARG00000005642	ENSDART00000027353	5	9	9	TCCACCATCAAAGTGTGGCGGTC	5	+	1672	1791
ENSDARG00000005642	ENSDART00000027353	5	9	9	GACTCCACCATCAAAGTGTGGCGGT	7	+	1669	1791
ENSDARG00000005786	ENSDART00000051666	5	2	1	TTCTGCGCCACTCATGCTGAGTA	5	-	2	1272
ENSDARG00000005786	ENSDART00000051666	5	3	2	GCAGCCAGCCATGATGGAGCATTT	6	-	186	1272
ENSDARG00000005786	ENSDART00000051666	5	3	2	CACTGCAGCCAGCCATGATGGAGCA	7	-	189	1272
ENSDARG00000005786	ENSDART00000051666	5	4	3	GTTAAACTCTTTTAAGATGACGTG	6	-	478	1272
ENSDARG00000005786	ENSDART00000051666	5	4	3	TCCTCCATCTTCCTGCGGGTGTT	5	-	451	1272
ENSDARG00000005786	ENSDART00000051666	5	6	5	AGCCACTCCAGTGCTGCCGCTGCG	6	-	715	1272
ENSDARG00000005786	ENSDART00000051666	5	6	5	AACAGCCACTCCAGTGCTGCCGCT	6	-	718	1272
ENSDARG00000005786	ENSDART00000051666	5	6	5	TGCTGCCGCTGCGCAGACGCTGAG	6	-	704	1272
ENSDARG00000005786	ENSDART00000051666	5	7	6	ACACTCACCTATTGCTCTGGAAAC	6	-	931	1272
ENSDARG00000005786	ENSDART00000051666	5	8	7	GCCGTCACAGGCCAGGAGGACGTA	6	-	1021	1272
ENSDARG00000005786	ENSDART00000051666	5	8	7	CTCCTCGTCCCTCAGTTCTGCAAAC	7	-	1234	1272
ENSDARG00000005943	ENSDART00000048180	5	1	1	GGCTGCTGCTCGGTGTGTGCGGCA	6	+	166	1383
ENSDARG00000005943	ENSDART00000048180	5	4	4	AGCAACGCATCAAAGTGGAGCTGAA	7	+	629	1383
ENSDARG00000005943	ENSDART00000048180	5	4	4	CAACGCATCAAAGTGGAGCTGAA	5	+	631	1383
ENSDARG00000005943	ENSDART00000050542	5	1	1	GGCTGCTGCTCGGTGTGTGCGGCA	6	+	166	1377
ENSDARG00000005943	ENSDART00000050542	5	3	3	CAACGCATCAAAGTGGAGCTGAA	5	+	625	1377
ENSDARG00000005943	ENSDART00000050542	5	3	3	AGCAACGCATCAAAGTGGAGCTGAA	7	+	623	1377
ENSDARG00000006014	ENSDART00000002888	5	4	4	TTATCCAAACGATGATAAGCAGCA	6	+	507	1062
ENSDARG00000006014	ENSDART00000002888	5	5	5	TTCATCTCCGCAATGGTTGGGAA	5	+	547	1062
ENSDARG00000006014	ENSDART00000002888	5	8	8	TTCATCTTCATCGTCTCTGTCGTT	6	+	973	1062
ENSDARG00000006014	ENSDART00000002888	5	8	8	ATCTTCATCGTCTCTGTCGTTGCA	6	+	976	1062
ENSDARG00000006217	ENSDART00000018121	5	1	1	GAACCAAACTGCTTCAGCAGGAGTG	7	+	23	1281
ENSDARG00000006217	ENSDART00000018121	5	1	1	CTCTACAGAGACAGCGATGAAGCT	6	+	250	1281
ENSDARG00000006217	ENSDART00000018121	5	1	1	AGCCGCCCAGTTAAAGGTGATTAA	6	+	675	1281
ENSDARG00000006217	ENSDART00000018121	5	2	2	AAACAAGGCAGGATGTGTGAGGAG	6	+	1171	1281
ENSDARG00000006217	ENSDART00000018121	5	2	2	CAAAGCTAAGACCCTCTTTGACGAA	7	+	1005	1281
ENSDARG00000006217	ENSDART00000018121	5	2	2	AAACAAGGCAGGATGTGTGAGGA	5	+	1171	1281
ENSDARG00000006217	ENSDART00000018121	5	2	2	AAAATCAAAACAAGGCAGGATGT	5	+	1164	1281
ENSDARG00000006491	ENSDART00000046440	5	2	2	AAACTCACCATTTGATGCAGACTCT	7	-	204	1329
ENSDARG00000006491	ENSDART00000046440	5	2	2	AACTCACCATTTGATGCAGACTCT	6	-	204	1329
ENSDARG00000006491	ENSDART00000046440	5	3	3	GAAGTCTCCGCGATCTGCAGACTTC	7	-	285	1329
ENSDARG00000006491	ENSDART00000046440	5	3	3	ACCAGCTCCTCTGAGGTGAATCT	5	-	379	1329
ENSDARG00000006491	ENSDART00000046440	5	4	4	GAAACCCACTGTTGTTGTGCCGAT	6	-	553	1329
ENSDARG00000006491	ENSDART00000046440	5	6	6	TTAGCCACACAGATGCCGCCTTT	5	-	697	1329
ENSDARG00000006491	ENSDART00000046440	5	10	10	AACTCATAATACTATATTTGCTGCT	7	-	1066	1329
ENSDARG00000006491	ENSDART00000046440	5	11	11	CTACTAAACCTCCTTGTTGAGCA	5	-	1209	1329
ENSDARG00000006491	ENSDART00000046440	5	11	11	ATCTACTAAACCTCCTTGTTGAGCA	7	-	1209	1329
ENSDARG00000006491	ENSDART00000046440	5	12	12	TCCCCCACCACCATGTGGCTGTA	5	-	1303	1329
ENSDARG00000006491	ENSDART00000046440	5	12	12	TTCCCCCACCACCATGTGGCTGT	5	-	1304	1329
ENSDARG00000006491	ENSDART00000046440	5	12	12	TTCCCCCACCACCATGTGGCTGTA	6	-	1303	1329
ENSDARG00000006686	ENSDART00000011332	5	2	2	GAACAAGACATACCATTAGTGGAA	6	+	82	681
ENSDARG00000006686	ENSDART00000011332	5	5	5	TGCTCCTGCACCTATTATGAGTG	5	+	493	681
ENSDARG00000006686	ENSDART00000011332	5	5	5	AACGCCAACGGAGAGCTGGTGGA	5	+	460	681
ENSDARG00000006691	ENSDART00000008807	5	2	2	AGACCCAAAGGTCCAATTTTGGGGG	7	-	95	495
ENSDARG00000006691	ENSDART00000008807	5	3	3	GTCATCACCCACCTTTTTAGGGGAC	7	-	120	495
ENSDARG00000006691	ENSDART00000008807	5	3	3	GTCATCACCCACCTTTTTAGGGG	5	-	122	495
ENSDARG00000006691	ENSDART00000008807	5	4	4	ACCTTCTTCCTGTCACGGGGAGGTT	7	-	269	495
ENSDARG00000006691	ENSDART00000008807	5	4	4	TCCTTCAGAGCCTTGATAATGAGGG	7	-	245	495
ENSDARG00000006691	ENSDART00000008807	5	6	6	GCACTCAACTGCACCGCTGTTGAT	6	-	472	495
ENSDARG00000006691	ENSDART00000008807	5	6	6	GAAGGCGACCATCAATGGTGCAGCC	7	-	427	495
ENSDARG00000006691	ENSDART00000008807	5	6	6	CTCAACTGCACCGCTGTTGATGTC	6	-	469	495
ENSDARG00000006832	ENSDART00000038740	5	2	2	TGCTGCTGCCACGCTGGGAGAGGAC	7	+	306	1812
ENSDARG00000006832	ENSDART00000038740	5	2	2	AGCCAAGCCCATGGGTCTGGTGGA	6	+	255	1812
ENSDARG00000006832	ENSDART00000038740	5	3	3	GAAATCATCCTGGTGGATGACAAC	6	+	565	1812
ENSDARG00000006832	ENSDART00000038740	5	3	3	ACCTTCCCCAGATCTCTGTGGTC	5	+	458	1812
ENSDARG00000006832	ENSDART00000038740	5	4	4	AGCCACTGCTCCTGTTGTAGGCTTC	7	+	717	1812
ENSDARG00000006832	ENSDART00000038740	5	4	4	CGCAGCCACTGCTCCTGTTGTAGGC	7	+	714	1812
ENSDARG00000006832	ENSDART00000038740	5	5	5	ACATCATCCCGCCTCAGGATTGGCT	7	+	917	1812
ENSDARG00000006832	ENSDART00000038740	5	5	5	GGCTACAACTGGGGCCTGTGGTGCA	7	+	889	1812
ENSDARG00000006832	ENSDART00000038740	5	5	5	GTACAATACCTTTGAGGTGCAGCA	6	+	846	1812
ENSDARG00000006832	ENSDART00000038740	5	7	7	CTATGCTAAGAGGAATGCGCTGCG	6	+	1185	1812
ENSDARG00000006832	ENSDART00000038740	5	8	8	AACACCATCACTTATGGAGAGGTA	6	+	1393	1812
ENSDARG00000006832	ENSDART00000038740	5	10	10	GTCTTCCCAGAGGCTCTGGGATTTT	7	+	1647	1812
ENSDARG00000006832	ENSDART00000038740	5	10	10	ACAAAATGCCTGGTGGATGATGGA	6	+	1579	1812
ENSDARG00000006895	ENSDART00000026067	5	8	8	AACTCATAACAGTGGATGCTGTT	5	+	812	1701
ENSDARG00000006895	ENSDART00000026067	5	8	8	GTTGGCTGCTTTGAGGGGGAAGAC	6	+	832	1701
ENSDARG00000006895	ENSDART00000026067	5	10	10	CCCTCAGGCACTAGTTTTGTGGTC	6	+	970	1701
ENSDARG00000006895	ENSDART00000026067	5	11	11	GCACAACGCTCTGAAGATGCAGAA	6	+	1101	1701
ENSDARG00000006895	ENSDART00000026067	5	11	11	GAATTCAACAAGCATTTCTGCAAAC	7	+	1671	1701
ENSDARG00000006895	ENSDART00000026067	5	11	11	CTCCTCAGAAGTCTGCCGTGGTC	5	+	1352	1701
ENSDARG00000006895	ENSDART00000026067	5	11	11	TTCAAATGCAACACGTAGAATGT	5	+	1463	1701
ENSDARG00000006895	ENSDART00000026067	5	11	11	CACCCACACACTGTTTGTGGCATGT	7	+	1559	1701
ENSDARG00000006895	ENSDART00000026067	5	11	11	CAACACCCACACACTGTTTGTGGCA	7	+	1556	1701
ENSDARG00000006895	ENSDART00000026067	5	11	11	AGAAGCACAACGCTCTGAAGATGCA	7	+	1097	1701
ENSDARG00000006895	ENSDART00000026067	5	11	11	ACCCACACACTGTTTGTGGCATGT	6	+	1560	1701
ENSDARG00000006895	ENSDART00000026067	5	11	11	ACACCCACACACTGTTTGTGGCA	5	+	1558	1701
ENSDARG00000006895	ENSDART00000026067	5	11	11	AACACCCACACACTGTTTGTGGCA	6	+	1557	1701
ENSDARG00000006939	ENSDART00000022492	5	5	5	AGCAGCTTCAGGAAAGGTGAAGCG	6	-	598	1464
ENSDARG00000006939	ENSDART00000022492	5	7	7	TTATACCACACTCGTTTGCAGTC	5	-	786	1464
ENSDARG00000006939	ENSDART00000022492	5	8	8	CCCTCCAGCACTGCTGGGGTTTG	5	-	920	1464
ENSDARG00000006939	ENSDART00000022492	5	8	8	CCCTCCAGCACTGCTGGGGTTTGT	6	-	919	1464
ENSDARG00000006939	ENSDART00000022492	5	8	8	CCCTCCAGCACTGCTGGGGTTTGTG	7	-	918	1464
ENSDARG00000006939	ENSDART00000022492	5	8	8	TGCCCCTCCAGCACTGCTGGGGT	5	-	923	1464
ENSDARG00000006939	ENSDART00000022492	5	8	8	TGCCCCTCCAGCACTGCTGGGGTT	6	-	922	1464
ENSDARG00000006939	ENSDART00000022492	5	9	9	GCACGCGACTCAGTTTGGGAGGCA	6	-	1181	1464
ENSDARG00000007034	ENSDART00000005671	5	4	4	GGCCACTGCTGTCTGGGACTGATAC	7	-	238	1221
ENSDARG00000007034	ENSDART00000005671	5	6	6	GCCTCCAGCCAGACTCTGATGAA	5	-	392	1221
ENSDARG00000007034	ENSDART00000005671	5	6	6	GTCAAAATCAGTTCCGCTGTAGTG	6	-	349	1221
ENSDARG00000007034	ENSDART00000005671	5	8	8	GTCCTCCTCTCCCGGGTGGTGGTG	6	-	815	1221
ENSDARG00000007034	ENSDART00000005671	5	8	8	GTCCTCCTCTCCCGGGTGGTGGT	5	-	816	1221
ENSDARG00000007034	ENSDART00000005671	5	8	8	CTAGGCGGCGGTGGTGGGGGCAGAG	7	-	866	1221
ENSDARG00000007034	ENSDART00000005671	5	8	8	GACTGCCACGACCAGGAGGCATTC	6	-	731	1221
ENSDARG00000007034	ENSDART00000005671	5	8	8	GAACCCACCCATAGGTCGCCGTC	5	-	680	1221
ENSDARG00000007034	ENSDART00000005671	5	8	8	CTCCTCTCCCGGGTGGTGGTGGAG	6	-	812	1221
ENSDARG00000007034	ENSDART00000005671	5	8	8	CTCCTCTCCCGGGTGGTGGTGGA	5	-	813	1221
ENSDARG00000007034	ENSDART00000005671	5	12	12	ACAGGCCCACCGATGTCGCTGTA	5	-	1021	1221
ENSDARG00000007034	ENSDART00000059790	5	5	4	GGCCACTGCTGTCTGGGACTGATAC	7	-	238	1293
ENSDARG00000007034	ENSDART00000059790	5	7	6	GTCAAAATCAGTTCCGCTGTAGTG	6	-	349	1293
ENSDARG00000007034	ENSDART00000059790	5	7	6	GCCTCCAGCCAGACTCTGATGAA	5	-	392	1293
ENSDARG00000007034	ENSDART00000059790	5	9	8	GTCCTCCTCTCCCGGGTGGTGGT	5	-	816	1293
ENSDARG00000007034	ENSDART00000059790	5	9	8	GTCCTCCTCTCCCGGGTGGTGGTG	6	-	815	1293
ENSDARG00000007034	ENSDART00000059790	5	9	8	GACTGCCACGACCAGGAGGCATTC	6	-	731	1293
ENSDARG00000007034	ENSDART00000059790	5	9	8	GAACCCACCCATAGGTCGCCGTC	5	-	680	1293
ENSDARG00000007034	ENSDART00000059790	5	9	8	CTCCTCTCCCGGGTGGTGGTGGAG	6	-	812	1293
ENSDARG00000007034	ENSDART00000059790	5	9	8	CTCCTCTCCCGGGTGGTGGTGGA	5	-	813	1293
ENSDARG00000007034	ENSDART00000059790	5	9	8	CTAGGCGGCGGTGGTGGGGGCAGAG	7	-	866	1293
ENSDARG00000007034	ENSDART00000059790	5	14	13	ACAGGCCCACCGATGTCGCTGTA	5	-	1051	1293
ENSDARG00000007034	ENSDART00000065575	5	5	4	GGCCACTGCTGTCTGGGACTGATAC	7	-	238	1293
ENSDARG00000007034	ENSDART00000065575	5	7	6	GTCAAAATCAGTTCCGCTGTAGTG	6	-	349	1293
ENSDARG00000007034	ENSDART00000065575	5	7	6	GCCTCCAGCCAGACTCTGATGAA	5	-	392	1293
ENSDARG00000007034	ENSDART00000065575	5	9	8	GTCCTCCTCTCCCGGGTGGTGGT	5	-	816	1293
ENSDARG00000007034	ENSDART00000065575	5	9	8	GTCCTCCTCTCCCGGGTGGTGGTG	6	-	815	1293
ENSDARG00000007034	ENSDART00000065575	5	9	8	GACTGCCACGACCAGGAGGCATTC	6	-	731	1293
ENSDARG00000007034	ENSDART00000065575	5	9	8	GAACCCACCCATAGGTCGCCGTC	5	-	680	1293
ENSDARG00000007034	ENSDART00000065575	5	9	8	CTCCTCTCCCGGGTGGTGGTGGAG	6	-	812	1293
ENSDARG00000007034	ENSDART00000065575	5	9	8	CTCCTCTCCCGGGTGGTGGTGGA	5	-	813	1293
ENSDARG00000007034	ENSDART00000065575	5	9	8	CTAGGCGGCGGTGGTGGGGGCAGAG	7	-	866	1293
ENSDARG00000007034	ENSDART00000065575	5	13	12	ACAGGCCCACCGATGTCGCTGTA	5	-	1051	1293
ENSDARG00000007120	ENSDART00000018407	5	5	5	AGACAACCCCATGCATGAAGCAGCC	7	+	228	726
ENSDARG00000007120	ENSDART00000018407	5	5	5	ACAACCCCATGCATGAAGCAGCC	5	+	230	726
ENSDARG00000007120	ENSDART00000018407	5	5	5	GACAACCCCATGCATGAAGCAGCC	6	+	229	726
ENSDARG00000007120	ENSDART00000018407	5	6	6	GAACACCTCTCTCTACTGGGCTTGC	7	+	327	726
ENSDARG00000007120	ENSDART00000018407	5	9	9	GCCACCAACGCACAGTGCGCCTCT	6	+	547	726
ENSDARG00000007120	ENSDART00000018407	5	10	10	GCACCCACAGTAACGCCGAGGAG	5	+	605	726
ENSDARG00000007120	ENSDART00000018407	5	10	10	CGCACCCACAGTAACGCCGAGGAG	6	+	604	726
ENSDARG00000007276	ENSDART00000009028	5	2	2	TCCTGCAGCCTTTGGGTGTGGAA	5	+	42	807
ENSDARG00000007276	ENSDART00000009028	5	6	6	ACAGACTTCAGCAGGCTCTGATGCC	7	+	521	807
ENSDARG00000007276	ENSDART00000078932	5	2	2	TCCTGCAGCCTTTGGGTGTGGAA	5	+	42	801
ENSDARG00000007276	ENSDART00000078932	5	6	6	ACAGACTTCAGCAGGCTCTGATGCC	7	+	521	801
ENSDARG00000007276	ENSDART00000098479	5	5	5	ACAGACTTCAGCAGGCTCTGATGCC	7	+	464	909
ENSDARG00000007276	ENSDART00000098480	5	5	5	TTACACAACTACAGGTTGCTTAC	5	+	266	735
ENSDARG00000007276	ENSDART00000098480	5	5	5	TTCAAAACATATCATGAAGTGGTT	6	+	244	735
ENSDARG00000007276	ENSDART00000098480	5	7	7	ACAGACTTCAGCAGGCTCTGATGCC	7	+	458	735
ENSDARG00000007276	ENSDART00000098483	5	2	2	TCCTGCAGCCTTTGGGTGTGGAA	5	+	48	822
ENSDARG00000007276	ENSDART00000098483	5	6	6	ACAGACTTCAGCAGGCTCTGATGCC	7	+	533	822
ENSDARG00000007349	ENSDART00000044361	5	1	1	CACTTCGGCATCCGGGACGGTTTC	6	-	51	804
ENSDARG00000007349	ENSDART00000044361	5	1	1	CTCCAATTACAGAAGCGTTTGTG	5	-	118	804
ENSDARG00000007349	ENSDART00000044361	5	2	2	CACTGCTGCTGGCGGGTGATGGC	5	-	333	804
ENSDARG00000007349	ENSDART00000044361	5	2	2	CCCATCTCCTCCTCTTGGGCCTGC	6	-	219	804
ENSDARG00000007349	ENSDART00000044361	5	2	2	TTCCTCACCTAGGTTGGTTGGAG	5	-	365	804
ENSDARG00000007349	ENSDART00000044361	5	2	2	TTCCTCACCTAGGTTGGTTGGAGAG	7	-	363	804
ENSDARG00000007349	ENSDART00000044361	5	6	6	GGCCCCCTCTATGATGGAGTCGAC	6	-	784	804
ENSDARG00000007349	ENSDART00000075476	5	1	1	CTCCAATTACAGAAGCGTTTGTG	5	-	118	801
ENSDARG00000007349	ENSDART00000075476	5	1	1	CACTTCGGCATCCGGGACGGTTTC	6	-	51	801
ENSDARG00000007349	ENSDART00000075476	5	2	2	CCCATCTCCTCCTCTTGGGCCTGC	6	-	219	801
ENSDARG00000007349	ENSDART00000075476	5	2	2	CACTGCTGCTGGCGGGTGATGGC	5	-	333	801
ENSDARG00000007349	ENSDART00000075476	5	2	2	TTCCTCACCTAGGTTGGTTGGAG	5	-	365	801
ENSDARG00000007349	ENSDART00000075476	5	2	2	TTCCTCACCTAGGTTGGTTGGAGAG	7	-	363	801
ENSDARG00000007349	ENSDART00000075476	5	6	6	GGCCCCCTCTATGATGGAGTCGAC	6	-	781	801
ENSDARG00000007349	ENSDART00000097634	5	1	1	CACTTCGGCATCCGGGACGGTTTC	6	-	51	570
ENSDARG00000007349	ENSDART00000097634	5	1	1	CTCCAATTACAGAAGCGTTTGTG	5	-	118	570
ENSDARG00000007349	ENSDART00000097634	5	2	2	TTCCTCACCTAGGTTGGTTGGAGAG	7	-	363	570
ENSDARG00000007349	ENSDART00000097634	5	2	2	TTCCTCACCTAGGTTGGTTGGAG	5	-	365	570
ENSDARG00000007349	ENSDART00000097634	5	2	2	CCCATCTCCTCCTCTTGGGCCTGC	6	-	219	570
ENSDARG00000007349	ENSDART00000097634	5	2	2	CACTGCTGCTGGCGGGTGATGGC	5	-	333	570
ENSDARG00000007349	ENSDART00000097635	5	1	1	CACTTCGGCATCCGGGACGGTTTC	6	-	51	720
ENSDARG00000007349	ENSDART00000097635	5	1	1	CTCCAATTACAGAAGCGTTTGTG	5	-	118	720
ENSDARG00000007349	ENSDART00000097635	5	2	2	TTCCTCACCTAGGTTGGTTGGAGAG	7	-	363	720
ENSDARG00000007349	ENSDART00000097635	5	2	2	TTCCTCACCTAGGTTGGTTGGAG	5	-	365	720
ENSDARG00000007349	ENSDART00000097635	5	2	2	CCCATCTCCTCCTCTTGGGCCTGC	6	-	219	720
ENSDARG00000007349	ENSDART00000097635	5	2	2	CACTGCTGCTGGCGGGTGATGGC	5	-	333	720
ENSDARG00000007349	ENSDART00000097636	5	1	1	CACTTCGGCATCCGGGACGGTTTC	6	-	51	729
ENSDARG00000007349	ENSDART00000097636	5	1	1	CTCCAATTACAGAAGCGTTTGTG	5	-	118	729
ENSDARG00000007349	ENSDART00000097636	5	2	2	TTCCTCACCTAGGTTGGTTGGAGAG	7	-	363	729
ENSDARG00000007349	ENSDART00000097636	5	2	2	TTCCTCACCTAGGTTGGTTGGAG	5	-	365	729
ENSDARG00000007349	ENSDART00000097636	5	2	2	CCCATCTCCTCCTCTTGGGCCTGC	6	-	219	729
ENSDARG00000007349	ENSDART00000097636	5	2	2	CACTGCTGCTGGCGGGTGATGGC	5	-	333	729
ENSDARG00000007349	ENSDART00000097637	5	1	1	CACTTCGGCATCCGGGACGGTTTC	6	-	51	801
ENSDARG00000007349	ENSDART00000097637	5	1	1	CTCCAATTACAGAAGCGTTTGTG	5	-	118	801
ENSDARG00000007349	ENSDART00000097637	5	2	2	CACTGCTGCTGGCGGGTGATGGC	5	-	333	801
ENSDARG00000007349	ENSDART00000097637	5	2	2	CCCATCTCCTCCTCTTGGGCCTGC	6	-	219	801
ENSDARG00000007349	ENSDART00000097637	5	2	2	TTCCTCACCTAGGTTGGTTGGAGAG	7	-	363	801
ENSDARG00000007349	ENSDART00000097637	5	2	2	TTCCTCACCTAGGTTGGTTGGAG	5	-	365	801
ENSDARG00000007349	ENSDART00000097637	5	5	5	GGCCCCCTCTATGATGGAGTCGAC	6	-	781	801
ENSDARG00000007429	ENSDART00000033545	5	2	1	CTCAGCCTCCTCCTCTGCGCCTGT	6	-	87	1785
ENSDARG00000007429	ENSDART00000033545	5	4	3	CACAGCACAGTCAAGACGACTAA	5	-	269	1785
ENSDARG00000007429	ENSDART00000033545	5	6	5	CAATCACACCATCTGGCCTGAGGA	6	-	413	1785
ENSDARG00000007429	ENSDART00000033545	5	7	6	AACGGCCGCAGTGAGGTGGGAGAG	6	-	606	1785
ENSDARG00000007429	ENSDART00000033545	5	8	7	AGCTGCTCCACATCCTCTGCAGTA	6	-	765	1785
ENSDARG00000007430	ENSDART00000022348	5	1	1	CAAAACTGCCTTCACCGCAGAGGTC	7	+	183	1098
ENSDARG00000007430	ENSDART00000022348	5	1	1	CACCGCAGAGGTCCTGGCGCAGTC	6	+	195	1098
ENSDARG00000007430	ENSDART00000022348	5	1	1	GTTGCCTGCAGATGCTCTGGTTCT	6	+	21	1098
ENSDARG00000007430	ENSDART00000022348	5	2	2	GGCATCTTCTCCAAGACTTGGAT	5	+	307	1098
ENSDARG00000007430	ENSDART00000022348	5	4	4	TCCCACAACACCTTCCTGGGCATTC	7	+	619	1098
ENSDARG00000007430	ENSDART00000022348	5	5	5	GGCCAACACAGGGGCTGTAGTGGGG	7	+	996	1098
ENSDARG00000007430	ENSDART00000022348	5	5	5	GCCAACACAGGGGCTGTAGTGGGG	6	+	997	1098
ENSDARG00000007657	ENSDART00000007057	5	5	4	TGCTCCTTATCCAGCAGCTGAATTT	7	+	452	957
ENSDARG00000007657	ENSDART00000007057	5	5	4	AACTGCTCCTTATCCAGCAGCTGAA	7	+	449	957
ENSDARG00000007657	ENSDART00000007057	5	8	7	AGCTTCCCAAAGCTGAGGAAGTC	5	+	797	957
ENSDARG00000007657	ENSDART00000007057	5	9	8	AAAGGCAGATGGTTGCAGATGAA	5	+	914	957
ENSDARG00000007709	ENSDART00000009118	5	2	2	GACCAAAGACGCTGTGCGACTGT	5	-	356	2646
ENSDARG00000007709	ENSDART00000009118	5	3	3	CTACCAGACTAACAGCATTTTTC	5	-	606	2646
ENSDARG00000007709	ENSDART00000009118	5	4	4	GAACGCTGCCTGAAGGCCGTTGTC	6	-	880	2646
ENSDARG00000007709	ENSDART00000009118	5	4	4	GTTGTCCTCTATAACGGAGCAGCT	6	-	862	2646
ENSDARG00000007709	ENSDART00000009118	5	6	6	GCCATCAGCCCAGTGAAGGCTTC	5	-	1286	2646
ENSDARG00000007709	ENSDART00000009118	5	6	6	GAAGGCTTCCATTCCGAGTTGTGC	6	-	1271	2646
ENSDARG00000007709	ENSDART00000009118	5	6	6	ACACAAGTCTGATCTGCGGGGGC	5	-	1213	2646
ENSDARG00000007709	ENSDART00000009118	5	6	6	ACACAAGTCTGATCTGCGGGGGCA	6	-	1212	2646
ENSDARG00000007709	ENSDART00000009118	5	7	7	GTACAATCCTCCATTCTGTGGTA	5	-	1490	2646
ENSDARG00000007709	ENSDART00000009118	5	8	8	CACTGCTCCTCTCTGAAGCTTTT	5	-	1576	2646
ENSDARG00000007709	ENSDART00000009118	5	8	8	CTCGGCAGACAAGTTTGCAGCGGTC	7	-	1684	2646
ENSDARG00000007709	ENSDART00000009118	5	9	9	GAACACAGATGGATGTGGTATCT	5	-	1773	2646
ENSDARG00000007709	ENSDART00000009118	5	9	9	AACCACTTATTTTCCTGCAGGTTGT	7	-	1882	2646
ENSDARG00000007709	ENSDART00000009118	5	10	10	AAATTCCCATTCAGGATGTAGGT	5	-	2044	2646
ENSDARG00000007709	ENSDART00000009118	5	10	10	GTAGACAGCAGCTGGATGGTGAT	5	-	2179	2646
ENSDARG00000007709	ENSDART00000009118	5	10	10	TTAGTCGCCCCAGCTGGAATGGTAA	7	-	1943	2646
ENSDARG00000007709	ENSDART00000009118	5	10	10	CAAATCTCCACAAGGCCGGATGT	5	-	2456	2646
ENSDARG00000007709	ENSDART00000009118	5	10	10	GACAGCAGCTGGATGGTGATGGG	5	-	2176	2646
ENSDARG00000007709	ENSDART00000009118	5	10	10	ACAGACTACAGTGCGGTGGCGCT	5	-	2540	2646
ENSDARG00000007709	ENSDART00000009118	5	10	10	ATCTCCACAAGGCCGGATGTCTGC	6	-	2452	2646
ENSDARG00000007709	ENSDART00000009118	5	10	10	CTAAACAGACTACAGTGCGGTGGCG	7	-	2542	2646
ENSDARG00000007709	ENSDART00000009118	5	10	10	CTAAACAGACTACAGTGCGGTGGC	6	-	2543	2646
ENSDARG00000007709	ENSDART00000080947	5	2	2	CTACCAGACTAACAGCATTTTTC	5	-	159	1371
ENSDARG00000007709	ENSDART00000080947	5	3	3	GAACGCTGCCTGAAGGCCGTTGTC	6	-	433	1371
ENSDARG00000007709	ENSDART00000080947	5	3	3	GTTGTCCTCTATAACGGAGCAGCT	6	-	415	1371
ENSDARG00000007709	ENSDART00000080947	5	5	5	GCCATCAGCCCAGTGAAGGCTTC	5	-	839	1371
ENSDARG00000007709	ENSDART00000080947	5	5	5	ACACAAGTCTGATCTGCGGGGGCA	6	-	765	1371
ENSDARG00000007709	ENSDART00000080947	5	5	5	ACACAAGTCTGATCTGCGGGGGC	5	-	766	1371
ENSDARG00000007709	ENSDART00000080947	5	5	5	GAAGGCTTCCATTCCGAGTTGTGC	6	-	824	1371
ENSDARG00000007709	ENSDART00000080947	5	7	7	GTACAATCCTCCATTCTGTGGTA	5	-	1031	1371
ENSDARG00000007709	ENSDART00000080947	5	8	8	CTCGGCAGACAAGTTTGCAGCGGTC	7	-	1222	1371
ENSDARG00000007709	ENSDART00000080947	5	8	8	CACTGCTCCTCTCTGAAGCTTTT	5	-	1114	1371
ENSDARG00000007709	ENSDART00000080947	5	9	9	GAACACAGATGGATGTGGTATCT	5	-	1311	1371
ENSDARG00000007709	ENSDART00000098300	5	1	1	GACCAAAGACGCTGTGCGACTGT	5	-	530	2652
ENSDARG00000007709	ENSDART00000098300	5	1	1	AGCACCCCCGCTCCTGGAGGCGTC	6	-	274	2652
ENSDARG00000007709	ENSDART00000098300	5	2	2	CTACCAGACTAACAGCATTTTTC	5	-	780	2652
ENSDARG00000007709	ENSDART00000098300	5	3	3	GAACGCTGCCTGAAGGCCGTTGTC	6	-	1054	2652
ENSDARG00000007709	ENSDART00000098300	5	3	3	GTTGTCCTCTATAACGGAGCAGCT	6	-	1036	2652
ENSDARG00000007709	ENSDART00000098300	5	5	5	GAAGGCTTCCATTCCGAGTTGTGC	6	-	1445	2652
ENSDARG00000007709	ENSDART00000098300	5	5	5	ACACAAGTCTGATCTGCGGGGGC	5	-	1387	2652
ENSDARG00000007709	ENSDART00000098300	5	5	5	GCCATCAGCCCAGTGAAGGCTTC	5	-	1460	2652
ENSDARG00000007709	ENSDART00000098300	5	5	5	ACACAAGTCTGATCTGCGGGGGCA	6	-	1386	2652
ENSDARG00000007709	ENSDART00000098300	5	6	6	GTACAATCCTCCATTCTGTGGTA	5	-	1664	2652
ENSDARG00000007709	ENSDART00000098300	5	7	7	CTCGGCAGACAAGTTTGCAGCGGTC	7	-	1858	2652
ENSDARG00000007709	ENSDART00000098300	5	7	7	CACTGCTCCTCTCTGAAGCTTTT	5	-	1750	2652
ENSDARG00000007709	ENSDART00000098300	5	8	8	GAACACAGATGGATGTGGTATCT	5	-	1947	2652
ENSDARG00000007709	ENSDART00000098300	5	8	8	AACCACTTATTTTCCTGCAGGTTGT	7	-	2056	2652
ENSDARG00000007709	ENSDART00000098300	5	9	9	TTAGTCGCCCCAGCTGGAATGGTAA	7	-	2117	2652
ENSDARG00000007709	ENSDART00000098300	5	9	9	AAATTCCCATTCAGGATGTAGGT	5	-	2218	2652
ENSDARG00000007709	ENSDART00000098300	5	9	9	GTAGACAGCAGCTGGATGGTGAT	5	-	2353	2652
ENSDARG00000007709	ENSDART00000098300	5	9	9	ATCTCCACAAGGCCGGATGTCTGC	6	-	2626	2652
ENSDARG00000007709	ENSDART00000098300	5	9	9	CAAATCTCCACAAGGCCGGATGT	5	-	2630	2652
ENSDARG00000007709	ENSDART00000098300	5	9	9	GACAGCAGCTGGATGGTGATGGG	5	-	2350	2652
ENSDARG00000007720	ENSDART00000011229	5	2	1	AGCACCTCCTTAGACTTGGGCATTC	7	-	8	372
ENSDARG00000007723	ENSDART00000011399	5	1	1	GCAGCCAAATCACTGGAGTCGGT	5	+	82	1023
ENSDARG00000007723	ENSDART00000011399	5	2	2	TGCCCCAAAGGGGACATGGGGAGAC	7	+	190	1023
ENSDARG00000007723	ENSDART00000011399	5	3	3	GAAAACAGAGAAGGTGGGGTTTGTA	7	+	436	1023
ENSDARG00000007723	ENSDART00000011399	5	3	3	GAAAACAGAGAAGGTGGGGTTTGT	6	+	436	1023
ENSDARG00000007723	ENSDART00000011399	5	3	3	GAAAACAGAGAAGGTGGGGTTTG	5	+	436	1023
ENSDARG00000007723	ENSDART00000011399	5	5	5	GCACTCGCAACCCAGGGGCGGGA	5	+	807	1023
ENSDARG00000007723	ENSDART00000011399	5	5	5	ATCATCATCCCCCTGCGGACAAC	5	+	898	1023
ENSDARG00000007791	ENSDART00000023554	5	3	3	AACTTCACCATGCTGGTTGGAGGC	6	+	232	1770
ENSDARG00000007791	ENSDART00000023554	5	4	4	GTTCACGTCACGTACCTCTGCTTGT	7	+	429	1770
ENSDARG00000007791	ENSDART00000023554	5	5	5	AGCCGCTTCCAAACTGGGTGAATTT	7	+	561	1770
ENSDARG00000007791	ENSDART00000023554	5	5	5	TTCCGCACCTTGTGTTCTGATGAC	6	+	517	1770
ENSDARG00000007791	ENSDART00000023554	5	6	6	CAACTCTGCGCCAGGCAGCAGAA	5	+	746	1770
ENSDARG00000007791	ENSDART00000023554	5	7	7	TACAGCTGCAAAAGGCTGTTGGT	5	+	812	1770
ENSDARG00000007791	ENSDART00000023554	5	9	9	AGACACTAATCAGCATGTGAAGTC	6	+	1014	1770
ENSDARG00000007791	ENSDART00000023554	5	9	9	ACACTAATCAGCATGTGAAGTCTGC	7	+	1016	1770
ENSDARG00000007791	ENSDART00000023554	5	10	10	TGCCCCTTCTGGCTGGGCAGCTGGT	7	+	1289	1770
ENSDARG00000007791	ENSDART00000023554	5	10	10	TCCGCCAACTTTCCCAGTCTTTGCT	7	+	1199	1770
ENSDARG00000007791	ENSDART00000023554	5	10	10	ACATGCCCCTTCTGGCTGGGCAGCT	7	+	1286	1770
ENSDARG00000007791	ENSDART00000097389	5	3	3	AACTTCACCATGCTGGTTGGAGGC	6	+	232	1431
ENSDARG00000007791	ENSDART00000097389	5	5	5	CAACTCTGCGCCAGGCAGCAGAA	5	+	410	1431
ENSDARG00000007791	ENSDART00000097389	5	6	6	TACAGCTGCAAAAGGCTGTTGGT	5	+	476	1431
ENSDARG00000007791	ENSDART00000097389	5	8	8	AGACACTAATCAGCATGTGAAGTC	6	+	678	1431
ENSDARG00000007791	ENSDART00000097389	5	8	8	ACACTAATCAGCATGTGAAGTCTGC	7	+	680	1431
ENSDARG00000007791	ENSDART00000097389	5	9	9	ACATGCCCCTTCTGGCTGGGCAGCT	7	+	950	1431
ENSDARG00000007791	ENSDART00000097389	5	9	9	TCCGCCAACTTTCCCAGTCTTTGCT	7	+	863	1431
ENSDARG00000007791	ENSDART00000097389	5	9	9	TGCCCCTTCTGGCTGGGCAGCTGGT	7	+	953	1431
ENSDARG00000007836	ENSDART00000012361	5	2	2	TTCTCCACCCTTCCTCTGTCTGT	5	-	132	1011
ENSDARG00000007836	ENSDART00000012361	5	3	3	GAACTCCTCGTGAGTCTGCAGAC	5	-	251	1011
ENSDARG00000007836	ENSDART00000012361	5	5	5	GCACGCTCCTTTCCACTGGGAATGT	7	-	698	1011
ENSDARG00000007836	ENSDART00000012361	5	6	6	CACTCCTTCTCATAGTAGATGCC	5	-	805	1011
ENSDARG00000007836	ENSDART00000012361	5	7	7	CAATACCACAGTGATTGTGTCTGT	6	-	971	1011
ENSDARG00000007944	ENSDART00000021159	5	1	1	TTATACTGCAAAAACGACTTTTTC	6	+	154	1206
ENSDARG00000007944	ENSDART00000021159	5	3	3	ATCAAAGCCAAGCAGCTGGAGAC	5	+	562	1206
ENSDARG00000007944	ENSDART00000021159	5	3	3	GTCTCAAGACCCACAGGATGATTAC	7	+	438	1206
ENSDARG00000007944	ENSDART00000021159	5	3	3	ACAATCAAAGCCAAGCAGCTGGA	5	+	559	1206
ENSDARG00000007944	ENSDART00000021159	5	4	4	TTCCGCAGCCCGAGGAGAATGAGAG	7	+	757	1206
ENSDARG00000008026	ENSDART00000016628	5	4	4	ACCAGCACAGTTAATGCTGCCTTT	6	-	349	2214
ENSDARG00000008026	ENSDART00000016628	5	4	4	GCAGCCCTCGCTCATGGGCCTAC	5	-	321	2214
ENSDARG00000008026	ENSDART00000016628	5	5	5	GACTCACCATTGTTTGTGTGCCGGA	7	-	581	2214
ENSDARG00000008026	ENSDART00000016628	5	6	6	AAAGTCGCACTGCATCTGTGAAC	5	-	633	2214
ENSDARG00000008026	ENSDART00000016628	5	6	6	CACTGCATCTGTGAACGCCGGAGTC	7	-	624	2214
ENSDARG00000008026	ENSDART00000016628	5	7	7	ACCAGCATCCAGTTCTTCTGTCTCT	7	-	797	2214
ENSDARG00000008026	ENSDART00000016628	5	16	16	ACAAACACAGACGGGCTGGAAAC	5	-	1270	2214
ENSDARG00000008026	ENSDART00000016628	5	16	16	GACAAACACAGACGGGCTGGAAAC	6	-	1270	2214
ENSDARG00000008026	ENSDART00000016628	5	16	16	AACGTCAAATCGCTGCTGGAGTC	5	-	1250	2214
ENSDARG00000008026	ENSDART00000016628	5	17	17	TCCAAACTCTGGTGCAGCAGCTGCT	7	-	1349	2214
ENSDARG00000008026	ENSDART00000016628	5	17	17	TCCTCCAAACTCTGGTGCAGCAGCT	7	-	1352	2214
ENSDARG00000008026	ENSDART00000016628	5	17	17	CACCGCGTCATCCATTTGCTGCA	5	-	1316	2214
ENSDARG00000008026	ENSDART00000016628	5	18	18	TACAGCAGAGCATGATGGGGAGAG	6	-	1522	2214
ENSDARG00000008026	ENSDART00000016628	5	20	20	TTCCTCTTCCTGAACTGCTTTGTC	6	-	2155	2214
ENSDARG00000008026	ENSDART00000016628	5	20	20	TGCTGCTTCCTTCACCGCTGGAGAC	7	-	1647	2214
ENSDARG00000008026	ENSDART00000016628	5	20	20	GTTTTCTGCCAGGAGGTGAAGGT	5	-	1730	2214
ENSDARG00000008026	ENSDART00000016628	5	20	20	CTCTTCCTCTTTTTGCGGACTTC	5	-	2063	2214
ENSDARG00000008026	ENSDART00000016628	5	20	20	CTCAGCCCAGTCGATGGCAGGGTTT	7	-	1749	2214
ENSDARG00000008026	ENSDART00000016628	5	20	20	AGCCCAGTCGATGGCAGGGTTTTCT	7	-	1746	2214
ENSDARG00000008026	ENSDART00000016628	5	20	20	ACCACCTGCTTCATCCTGCGCCTCT	7	-	1835	2214
ENSDARG00000008026	ENSDART00000016628	5	20	20	AAACAATGCTGTCTCGGTATAGGTT	7	-	1687	2214
ENSDARG00000008026	ENSDART00000098409	5	4	4	GCAGCCCTCGCTCATGGGCCTAC	5	-	321	825
ENSDARG00000008026	ENSDART00000098409	5	4	4	ACCAGCACAGTTAATGCTGCCTTT	6	-	349	825
ENSDARG00000008026	ENSDART00000098409	5	5	5	GACTCACCATTGTTTGTGTGCCGGA	7	-	581	825
ENSDARG00000008026	ENSDART00000098409	5	6	6	CACTGCATCTGTGAACGCCGGAGTC	7	-	624	825
ENSDARG00000008026	ENSDART00000098409	5	6	6	AAAGTCGCACTGCATCTGTGAAC	5	-	633	825
ENSDARG00000008026	ENSDART00000098409	5	7	7	ACCAGCATCCAGTTCTTCTGTCTCT	7	-	797	825
ENSDARG00000008032	ENSDART00000008402	5	1	1	GTTCTCAACATGGCGGCGACGGG	5	+	1	2859
ENSDARG00000008032	ENSDART00000008402	5	1	1	GTTGCCAGATATCGAAGAGGAGGCT	7	+	42	2859
ENSDARG00000008032	ENSDART00000008402	5	1	1	TCCAGCGGCTGGAGGAGCAGGTGAG	7	+	188	2859
ENSDARG00000008032	ENSDART00000008402	5	1	1	TTCTCAACATGGCGGCGACGGGGAA	7	+	2	2859
ENSDARG00000008032	ENSDART00000008402	5	2	2	CGCAAAGCCAGACAGAAGATGAG	5	+	289	2859
ENSDARG00000008032	ENSDART00000008402	5	3	3	AAATCCGCATAACAGAAGATGAA	5	+	368	2859
ENSDARG00000008032	ENSDART00000008402	5	3	3	GAAATCCGCATAACAGAAGATGAA	6	+	367	2859
ENSDARG00000008032	ENSDART00000008402	5	6	6	GTATTCAGACTGGGCAGATGATGGC	7	+	759	2859
ENSDARG00000008032	ENSDART00000008402	5	6	6	AAAGGCAAACCGTATGAGGAGGCC	6	+	835	2859
ENSDARG00000008032	ENSDART00000008402	5	7	7	AAATACACCACGTATCTGGTGAGCA	7	+	1000	2859
ENSDARG00000008032	ENSDART00000008402	5	7	7	AAATACACCACGTATCTGGTGAG	5	+	1000	2859
ENSDARG00000008032	ENSDART00000008402	5	15	15	CACGCCAGACAAGAGGAGGAGAA	5	+	1723	2859
ENSDARG00000008032	ENSDART00000008402	5	18	18	GCAACCCCCCAGGCAGGAGGATGAA	7	+	2594	2859
ENSDARG00000008032	ENSDART00000008402	5	18	18	CTCTCAGGCGGTGTTGAAGATGGA	6	+	2529	2859
ENSDARG00000008032	ENSDART00000008402	5	18	18	CAAGGCAACTTCAGGGAGCGTAA	5	+	2660	2859
ENSDARG00000008032	ENSDART00000008402	5	18	18	ACAGGCCTCTCAGGCGGTGTTGAA	6	+	2523	2859
ENSDARG00000008032	ENSDART00000008402	5	19	19	CACTCCAGATGCCAAAGCAGAGAAC	7	+	2736	2859
ENSDARG00000008153	ENSDART00000009212	5	2	2	TTCTGCAGCTGGCCTGCTGCTGTG	6	+	29	1326
ENSDARG00000008153	ENSDART00000009212	5	3	3	TGCTTCGGCATGGCCTGTTTTTTCT	7	+	292	1326
ENSDARG00000008153	ENSDART00000009212	5	3	3	GTCTTCACCATTCGTGTGCAGAA	5	+	328	1326
ENSDARG00000008153	ENSDART00000009212	5	3	3	GTCAGCAGCTCAATGCTGGAGAG	5	+	227	1326
ENSDARG00000008153	ENSDART00000009212	5	5	5	ATCATCATCCAGTTGATGCTTCT	5	+	505	1326
ENSDARG00000008153	ENSDART00000009212	5	6	6	GTACTACACTCATCCAGAGGCCTGC	7	+	663	1326
ENSDARG00000008153	ENSDART00000009212	5	7	7	GCCCACCTCAGGTCTTCTGCAGCC	6	+	777	1326
ENSDARG00000008153	ENSDART00000009212	5	8	8	GGCAACATCACCGTCTGCGTCTTT	6	+	886	1326
ENSDARG00000008153	ENSDART00000009212	5	10	10	GCACGCTGCTGTTTCTGCTGGGTTG	7	+	1069	1326
ENSDARG00000008153	ENSDART00000009212	5	10	10	GCACGCTGCTGTTTCTGCTGGGTT	6	+	1069	1326
ENSDARG00000008153	ENSDART00000009212	5	11	11	TACTGCTTCTTTCACTTTGTTTTC	6	+	1177	1326
ENSDARG00000008153	ENSDART00000009212	5	12	12	CAACGCAAAGATCGAGAGGCTTCT	6	+	1254	1326
ENSDARG00000008153	ENSDART00000009212	5	12	12	AGAGGCTTCTAGAGGGAAGCTGGT	6	+	1268	1326
ENSDARG00000008153	ENSDART00000097193	5	2	2	TTCTGCAGCTGGCCTGCTGCTGTG	6	+	29	1386
ENSDARG00000008153	ENSDART00000097193	5	3	3	GTCAGCAGCTCAATGCTGGAGAG	5	+	227	1386
ENSDARG00000008153	ENSDART00000097193	5	3	3	TGCTTCGGCATGGCCTGTTTTTTCT	7	+	292	1386
ENSDARG00000008153	ENSDART00000097193	5	3	3	GTCTTCACCATTCGTGTGCAGAA	5	+	328	1386
ENSDARG00000008153	ENSDART00000097193	5	5	5	ATCATCATCCAGTTGATGCTTCT	5	+	505	1386
ENSDARG00000008153	ENSDART00000097193	5	6	6	GTACTACACTCATCCAGAGGCCTGC	7	+	663	1386
ENSDARG00000008153	ENSDART00000097193	5	7	7	GCCCACCTCAGGTCTTCTGCAGCC	6	+	777	1386
ENSDARG00000008153	ENSDART00000097193	5	8	8	GGCAACATCACCGTCTGCGTCTTT	6	+	892	1386
ENSDARG00000008153	ENSDART00000097193	5	10	10	GCACGCTGCTGTTTCTGCTGGGTT	6	+	1075	1386
ENSDARG00000008153	ENSDART00000097193	5	10	10	GCACGCTGCTGTTTCTGCTGGGTTG	7	+	1075	1386
ENSDARG00000008153	ENSDART00000097193	5	11	11	TACTGCTTCTTTCACTTTGTTTTC	6	+	1183	1386
ENSDARG00000008153	ENSDART00000097193	5	12	12	CAACGCAAAGATCGAGAGGCTTCT	6	+	1260	1386
ENSDARG00000008153	ENSDART00000097193	5	12	12	AGAGGCTTCTAGAGGGAAGCTGGT	6	+	1274	1386
ENSDARG00000008153	ENSDART00000097194	5	2	2	TTCTGCAGCTGGCCTGCTGCTGTG	6	+	29	1380
ENSDARG00000008153	ENSDART00000097194	5	3	3	TGCTTCGGCATGGCCTGTTTTTTCT	7	+	292	1380
ENSDARG00000008153	ENSDART00000097194	5	3	3	GTCTTCACCATTCGTGTGCAGAA	5	+	328	1380
ENSDARG00000008153	ENSDART00000097194	5	3	3	GTCAGCAGCTCAATGCTGGAGAG	5	+	227	1380
ENSDARG00000008153	ENSDART00000097194	5	5	5	ATCATCATCCAGTTGATGCTTCT	5	+	505	1380
ENSDARG00000008153	ENSDART00000097194	5	6	6	GTACTACACTCATCCAGAGGCCTGC	7	+	663	1380
ENSDARG00000008153	ENSDART00000097194	5	7	7	GCCCACCTCAGGTCTTCTGCAGCC	6	+	777	1380
ENSDARG00000008153	ENSDART00000097194	5	8	8	GGCAACATCACCGTCTGCGTCTTT	6	+	886	1380
ENSDARG00000008153	ENSDART00000097194	5	10	10	GCACGCTGCTGTTTCTGCTGGGTTG	7	+	1069	1380
ENSDARG00000008153	ENSDART00000097194	5	10	10	GCACGCTGCTGTTTCTGCTGGGTT	6	+	1069	1380
ENSDARG00000008153	ENSDART00000097194	5	11	11	TACTGCTTCTTTCACTTTGTTTTC	6	+	1177	1380
ENSDARG00000008153	ENSDART00000097194	5	12	12	CAACGCAAAGATCGAGAGGCTTCT	6	+	1254	1380
ENSDARG00000008153	ENSDART00000097194	5	12	12	AGAGGCTTCTAGAGGGAAGCTGGT	6	+	1268	1380
ENSDARG00000008414	ENSDART00000017138	5	2	2	TCCCCAAACTCTGATTGTGTGTTG	6	-	138	1059
ENSDARG00000008414	ENSDART00000017138	5	2	2	CCCAAACTCTGATTGTGTGTTGTG	6	-	136	1059
ENSDARG00000008414	ENSDART00000017138	5	6	6	ACCTCCATCTGAATAGAGGGAGTG	6	-	702	1059
ENSDARG00000008414	ENSDART00000017138	5	6	6	AACCCCAACCTCCATCTGAATAG	5	-	710	1059
ENSDARG00000008414	ENSDART00000017138	5	6	6	AAAACCCCAACCTCCATCTGAATAG	7	-	710	1059
ENSDARG00000008414	ENSDART00000017138	5	7	7	GCCCCAGACAGGACATGTCTTTGGC	7	-	910	1059
ENSDARG00000008414	ENSDART00000017138	5	7	7	TCCAGCTCCTCCTGCTGTGGTTAC	6	-	995	1059
ENSDARG00000008414	ENSDART00000017138	5	7	7	TTCAAAACCGCAGAGATGTGTCT	5	-	763	1059
ENSDARG00000008551	ENSDART00000007512	5	3	3	AGACACTTAACGCTGGAGATGTG	5	+	194	444
ENSDARG00000008551	ENSDART00000007512	5	4	4	AAAAACGCAAGGACAAGGAGAAGAA	7	+	323	444
ENSDARG00000008592	ENSDART00000002938	5	3	3	AGATGCAGATGCTGGAAGGTTTT	5	-	232	1896
ENSDARG00000008592	ENSDART00000002938	5	4	4	TGCTACCTCAAAGTTTTTGTTGAT	6	-	460	1896
ENSDARG00000008592	ENSDART00000002938	5	4	4	CTCCTCCTCGTTTTGATGTGGGT	5	-	353	1896
ENSDARG00000008592	ENSDART00000002938	5	4	4	AGATGCTACCTCAAAGTTTTTGTT	6	-	463	1896
ENSDARG00000008592	ENSDART00000002938	5	4	4	CTCCGCTCCTCCTCGTTTTGATGTG	7	-	356	1896
ENSDARG00000008592	ENSDART00000002938	5	4	4	CGCTCCTCCTCGTTTTGATGTGGGT	7	-	353	1896
ENSDARG00000008592	ENSDART00000002938	5	6	6	CTCGTCTTCCACACAGCGGGAGTT	6	-	646	1896
ENSDARG00000008592	ENSDART00000002938	5	7	7	CTCACCCTCCAGCAGTTTTTGCA	5	-	857	1896
ENSDARG00000008592	ENSDART00000002938	5	7	7	CCCTCCAGCAGTTTTTGCAGGCTGC	7	-	851	1896
ENSDARG00000008592	ENSDART00000002938	5	7	7	CTCTCACCCTCCAGCAGTTTTTGCA	7	-	857	1896
ENSDARG00000008592	ENSDART00000002938	5	8	8	GCATCCATCACAGATTTGATGTG	5	-	943	1896
ENSDARG00000008592	ENSDART00000002938	5	8	8	TCCATCACAGATTTGATGTGTCT	5	-	940	1896
ENSDARG00000008592	ENSDART00000002938	5	11	11	GAACTCAAACACACAGGGGAATTG	6	-	1243	1896
ENSDARG00000008592	ENSDART00000002938	5	11	11	CTCTCCTTCTGACAGTTGCCGAT	5	-	1327	1896
ENSDARG00000008592	ENSDART00000002938	5	11	11	AGACGCTTCCTTTGGGTCGCTGTC	6	-	1174	1896
ENSDARG00000008592	ENSDART00000002938	5	11	11	CTCAAACACACAGGGGAATTGTTG	6	-	1240	1896
ENSDARG00000008592	ENSDART00000002938	5	11	11	AACTCAAACACACAGGGGAATTG	5	-	1243	1896
ENSDARG00000008592	ENSDART00000002938	5	13	13	AGAGTCAGCAGCGTGTCTAGAAC	5	-	1546	1896
ENSDARG00000008592	ENSDART00000002938	5	14	14	ATCTGCAACAGCCAGCTGCTGGA	5	-	1613	1896
ENSDARG00000008597	ENSDART00000014686	5	1	1	GACCGCGGCCAGTTTTAAGGCGTT	6	+	51	1572
ENSDARG00000008597	ENSDART00000014686	5	2	2	ATCCTCATCCCCAGCTCTGGTTCT	6	+	249	1572
ENSDARG00000008597	ENSDART00000014686	5	2	2	GACCACCTCGTACGGCTGTTAAC	5	+	115	1572
ENSDARG00000008597	ENSDART00000014686	5	2	2	TCCTCATCCCCAGCTCTGGTTCT	5	+	250	1572
ENSDARG00000008597	ENSDART00000014686	5	2	2	TTAACCAGAGTTATGGATGAGCG	5	+	133	1572
ENSDARG00000008597	ENSDART00000014686	5	3	3	GAATTCAGAGAAGGGGAAGGAGAG	6	+	532	1572
ENSDARG00000008597	ENSDART00000014686	5	3	3	CACAGCTGCTCTTGCGGTGTCGAT	6	+	458	1572
ENSDARG00000008597	ENSDART00000014686	5	3	3	AGATTCAGAGAATCTTTCTGGCTTT	7	+	416	1572
ENSDARG00000008597	ENSDART00000014686	5	3	3	ACACACAGCTGCTCTTGCGGTGTC	6	+	455	1572
ENSDARG00000008597	ENSDART00000014686	5	3	3	AACAAACTCCAGAGGAGGACGAG	5	+	572	1572
ENSDARG00000008597	ENSDART00000014686	5	4	4	TTCTTCACAGGCAAGCTTGATGC	5	+	820	1572
ENSDARG00000008597	ENSDART00000014686	5	7	7	AAAAGCTGCAATGGAGGAGCAGAC	6	+	1503	1572
ENSDARG00000008597	ENSDART00000014686	5	7	7	GCAGACGGCGGCTATGGAGGAAAC	6	+	1521	1572
ENSDARG00000008597	ENSDART00000073997	5	2	2	TTAACCAGAGTTATGGATGAGCG	5	+	76	1353
ENSDARG00000008597	ENSDART00000073997	5	2	2	TCCTCATCCCCAGCTCTGGTTCT	5	+	193	1353
ENSDARG00000008597	ENSDART00000073997	5	2	2	GACCACCTCGTACGGCTGTTAAC	5	+	58	1353
ENSDARG00000008597	ENSDART00000073997	5	2	2	ATCCTCATCCCCAGCTCTGGTTCT	6	+	192	1353
ENSDARG00000008597	ENSDART00000073997	5	3	3	GAATTCAGAGAAGGGGAAGGAGAG	6	+	475	1353
ENSDARG00000008597	ENSDART00000073997	5	3	3	CACAGCTGCTCTTGCGGTGTCGAT	6	+	401	1353
ENSDARG00000008597	ENSDART00000073997	5	3	3	AGATTCAGAGAATCTTTCTGGCTTT	7	+	359	1353
ENSDARG00000008597	ENSDART00000073997	5	3	3	ACACACAGCTGCTCTTGCGGTGTC	6	+	398	1353
ENSDARG00000008597	ENSDART00000073997	5	3	3	AACAAACTCCAGAGGAGGACGAG	5	+	515	1353
ENSDARG00000008597	ENSDART00000073997	5	4	4	TTCTTCACAGGCAAGCTTGATGC	5	+	763	1353
ENSDARG00000008597	ENSDART00000074000	5	1	1	GACCGCGGCCAGTTTTAAGGCGTT	6	+	9	1506
ENSDARG00000008597	ENSDART00000074000	5	2	2	ATCCTCATCCCCAGCTCTGGTTCT	6	+	207	1506
ENSDARG00000008597	ENSDART00000074000	5	2	2	GACCACCTCGTACGGCTGTTAAC	5	+	73	1506
ENSDARG00000008597	ENSDART00000074000	5	2	2	TCCTCATCCCCAGCTCTGGTTCT	5	+	208	1506
ENSDARG00000008597	ENSDART00000074000	5	2	2	TTAACCAGAGTTATGGATGAGCG	5	+	91	1506
ENSDARG00000008597	ENSDART00000074000	5	3	3	GAATTCAGAGAAGGGGAAGGAGAG	6	+	490	1506
ENSDARG00000008597	ENSDART00000074000	5	3	3	CACAGCTGCTCTTGCGGTGTCGAT	6	+	416	1506
ENSDARG00000008597	ENSDART00000074000	5	3	3	AGATTCAGAGAATCTTTCTGGCTTT	7	+	374	1506
ENSDARG00000008597	ENSDART00000074000	5	3	3	ACACACAGCTGCTCTTGCGGTGTC	6	+	413	1506
ENSDARG00000008597	ENSDART00000074000	5	3	3	AACAAACTCCAGAGGAGGACGAG	5	+	530	1506
ENSDARG00000008597	ENSDART00000074000	5	5	5	TTCTTCACAGGCAAGCTTGATGC	5	+	754	1506
ENSDARG00000008597	ENSDART00000074000	5	8	8	GCAGACGGCGGCTATGGAGGAAAC	6	+	1455	1506
ENSDARG00000008597	ENSDART00000074000	5	8	8	AAAAGCTGCAATGGAGGAGCAGAC	6	+	1437	1506
ENSDARG00000008835	ENSDART00000021286	5	4	4	TGCAACAGATAGTTGAAGACTGT	5	-	472	2361
ENSDARG00000008835	ENSDART00000021286	5	5	5	GTTAAAGCCCATTTGATGGTTTT	5	-	592	2361
ENSDARG00000008835	ENSDART00000021286	5	5	5	AAACAAACCAATAACAGAAGCAGTT	7	-	612	2361
ENSDARG00000008835	ENSDART00000021286	5	5	5	AACAAACCAATAACAGAAGCAGTT	6	-	612	2361
ENSDARG00000008835	ENSDART00000021286	5	6	6	TTACCAACCAGAACTCGCAGACTTC	7	-	734	2361
ENSDARG00000008835	ENSDART00000021286	5	6	6	CGCCACACAATTCCTGGGATGGA	5	-	663	2361
ENSDARG00000008835	ENSDART00000021286	5	6	6	TACCAACCAGAACTCGCAGACTTC	6	-	734	2361
ENSDARG00000008835	ENSDART00000021286	5	9	9	ACAGCCAGAAGGCATCTGTAGCA	5	-	926	2361
ENSDARG00000008835	ENSDART00000021286	5	13	13	CTCTCCAGCCAGACTGAAGGTGTG	6	-	1456	2361
ENSDARG00000008835	ENSDART00000021286	5	13	13	TTCACCTTCAGAAATGGCAGTGTTT	7	-	1515	2361
ENSDARG00000008835	ENSDART00000021286	5	14	14	GTATCCCCAGATGTCGTCTGAGAC	6	-	1551	2361
ENSDARG00000008835	ENSDART00000021286	5	16	16	CAACAACACTGAGGGTTCTGGCAAC	7	-	1978	2361
ENSDARG00000008835	ENSDART00000021286	5	16	16	GTCAACATCAGATTGACTGGTGC	5	-	2029	2361
ENSDARG00000008835	ENSDART00000021286	5	17	17	TCCACCAGAACCATGTTAGTAGTT	6	-	2082	2361
ENSDARG00000008840	ENSDART00000013431	5	5	5	CTCTTCACCAAAGAGCTGGAGAA	5	+	229	1074
ENSDARG00000008840	ENSDART00000013431	5	7	7	AAAATCCTCATGATGCAGTGGTG	5	+	353	1074
ENSDARG00000008840	ENSDART00000013431	5	9	9	GGCCTCAAACGTATGGGCTGGGAA	6	+	577	1074
ENSDARG00000008840	ENSDART00000013431	5	9	9	GCCTCAAACGTATGGGCTGGGAA	5	+	578	1074
ENSDARG00000008840	ENSDART00000013431	5	9	9	GCAGGCCTCAAACGTATGGGCTGGG	7	+	574	1074
ENSDARG00000008840	ENSDART00000013431	5	9	9	CTATGCTGCTATCATTCTGGCTGC	6	+	549	1074
ENSDARG00000008840	ENSDART00000013431	5	9	9	CTATCATTCTGGCTGCTGCAGGC	5	+	557	1074
ENSDARG00000008840	ENSDART00000013431	5	11	11	TTCCTCAAACAGCTGGTGGGTTC	5	+	760	1074
ENSDARG00000008840	ENSDART00000013431	5	11	11	CCCGACACAGTTCTACGCTGCATCT	7	+	724	1074
ENSDARG00000008840	ENSDART00000013431	5	13	13	ACACCATGCAGACGTGTGTGGAA	5	+	881	1074
ENSDARG00000008840	ENSDART00000013431	5	14	14	CTCATCATCAGCCCTCGAAGCTGCT	7	+	969	1074
ENSDARG00000008840	ENSDART00000013431	5	14	14	ATCATCAGCCCTCGAAGCTGCTGAG	7	+	972	1074
ENSDARG00000008840	ENSDART00000045649	5	5	5	CTCTTCACCAAAGAGCTGGAGAA	5	+	238	741
ENSDARG00000008840	ENSDART00000045649	5	7	7	AAAATCCTCATGATGCAGTGGTG	5	+	362	741
ENSDARG00000008840	ENSDART00000045649	5	9	9	GGCCTCAAACGTATGGGCTGGGAA	6	+	586	741
ENSDARG00000008840	ENSDART00000045649	5	9	9	GCCTCAAACGTATGGGCTGGGAA	5	+	587	741
ENSDARG00000008840	ENSDART00000045649	5	9	9	GCAGGCCTCAAACGTATGGGCTGGG	7	+	583	741
ENSDARG00000008840	ENSDART00000045649	5	9	9	CTATGCTGCTATCATTCTGGCTGC	6	+	558	741
ENSDARG00000008840	ENSDART00000045649	5	9	9	CTATCATTCTGGCTGCTGCAGGC	5	+	566	741
ENSDARG00000008840	ENSDART00000045649	5	11	11	CCCGACACAGTTCTACGCTGCATCT	7	+	733	741
ENSDARG00000008877	ENSDART00000017654	5	3	3	TTCCCATACTCCCCTCGTTTGGGGC	7	+	436	1008
ENSDARG00000008877	ENSDART00000017654	5	3	3	TCCAACAGCCGCTATGATGTGTTC	6	+	685	1008
ENSDARG00000008877	ENSDART00000017654	5	3	3	AAACCCAGAGAGCCCTGTGGAGGTG	7	+	616	1008
ENSDARG00000008877	ENSDART00000017654	5	3	3	AAACCCAGAGAGCCCTGTGGAGGT	6	+	616	1008
ENSDARG00000008877	ENSDART00000017654	5	4	4	GCAGTCCCACGGAGGCTGCTGTT	5	+	929	1008
ENSDARG00000008904	ENSDART00000041412	5	2	1	TTCTTCTACCTTATGCATTGGGT	5	-	221	4710
ENSDARG00000008904	ENSDART00000041412	5	4	3	CCCTGCACAGCTAACTGCAGGTTTT	7	-	608	4710
ENSDARG00000008904	ENSDART00000041412	5	4	3	CCCTCCTCCTGACATGGGGCTAG	5	-	416	4710
ENSDARG00000008904	ENSDART00000041412	5	4	3	GGCTGCTGCTGCATGGTGGGAAGGC	7	-	641	4710
ENSDARG00000008904	ENSDART00000041412	5	4	3	GCCCTCCTCCTGACATGGGGCTAG	6	-	416	4710
ENSDARG00000008904	ENSDART00000041412	5	7	6	GCCTTCAGCTCCACTGTGGCTTT	5	-	1141	4710
ENSDARG00000008904	ENSDART00000041412	5	7	6	CCCACCTGCCGCTGGAAGTTGAG	5	-	1174	4710
ENSDARG00000008904	ENSDART00000041412	5	7	6	TTAGTCCGCAGATCAGGTGGCAGAG	7	-	1118	4710
ENSDARG00000008904	ENSDART00000041412	5	10	9	TTCTTCTCCTTGGCAGCTTGAGCA	6	-	1665	4710
ENSDARG00000008904	ENSDART00000041412	5	10	9	GTTGGCCACATATTCATCTGTCTGT	7	-	1611	4710
ENSDARG00000008904	ENSDART00000041412	5	12	11	GGCCTCTAACTGACTGGACTTGGGA	7	-	1848	4710
ENSDARG00000008904	ENSDART00000041412	5	15	14	GGCTACTCCATAGTAAGACTGGGAG	7	-	2106	4710
ENSDARG00000008904	ENSDART00000041412	5	15	14	ATCATCCACATCCTGCTTAGCAGAC	7	-	2052	4710
ENSDARG00000008904	ENSDART00000041412	5	17	16	AGCTCATAAACCCAGTTGGATAA	5	-	2368	4710
ENSDARG00000008904	ENSDART00000041412	5	18	17	GACCTCCTCATTGATGGGGTGCC	5	-	2431	4710
ENSDARG00000008904	ENSDART00000041412	5	19	18	AACCACTGCTCAAAGGTGCTGCA	5	-	2731	4710
ENSDARG00000008904	ENSDART00000041412	5	20	19	GCAAACGACGAATGATGAGGATGGT	7	-	2806	4710
ENSDARG00000008904	ENSDART00000041412	5	25	24	AGCATCGCACGATCCTCTGACTTT	6	-	3315	4710
ENSDARG00000008904	ENSDART00000041412	5	26	25	TTCTCCTCCACACTGTTGACGGT	5	-	3541	4710
ENSDARG00000008904	ENSDART00000041412	5	28	27	GTCCACATCCCTACGATGACGGG	5	-	3938	4710
ENSDARG00000008904	ENSDART00000041412	5	28	27	ATCTTCTTCCATTAGCCGAGGTT	5	-	3827	4710
ENSDARG00000008904	ENSDART00000041412	5	28	27	CTCATCTTCTTCCATTAGCCGAG	5	-	3830	4710
ENSDARG00000008904	ENSDART00000041412	5	29	28	TCCTCACGCCTCACGTCTTTGTC	5	-	4072	4710
ENSDARG00000008904	ENSDART00000041412	5	29	28	GCATTCATCTGTTTGGTGAGTTT	5	-	4159	4710
ENSDARG00000008904	ENSDART00000041412	5	30	29	AAAGACCTCGCTGAGCTGACGGC	5	-	4220	4710
ENSDARG00000008904	ENSDART00000041412	5	32	31	CTCTTCATCATCATCGTCGCTTTC	6	-	4501	4710
ENSDARG00000008912	ENSDART00000046362	5	1	1	GCCACCCGCACACACCTGTGGAGAG	7	-	84	2823
ENSDARG00000008912	ENSDART00000046362	5	1	1	TGCGGCAGCCACACAGGAAGCAGAA	7	-	188	2823
ENSDARG00000008912	ENSDART00000046362	5	1	1	CTCAAAGCAGGGTTTCTTGGGTC	5	-	143	2823
ENSDARG00000008912	ENSDART00000046362	5	1	1	TCCATCAGCACTACTGTTGCTGTC	6	-	121	2823
ENSDARG00000008912	ENSDART00000046362	5	3	3	AGAGCCAAATATAGGCGAAGATGCT	7	-	643	2823
ENSDARG00000008912	ENSDART00000046362	5	5	5	ATCGTCCCCAGAGTTGGCGGAGCC	6	-	1321	2823
ENSDARG00000008912	ENSDART00000046362	5	5	5	TTCAAAATCGTCCCCAGAGTTGGCG	7	-	1326	2823
ENSDARG00000008912	ENSDART00000046362	5	5	5	AAAATCGTCCCCAGAGTTGGCGGA	6	-	1324	2823
ENSDARG00000008912	ENSDART00000046362	5	5	5	GTCCCCAGAGTTGGCGGAGCCGTT	6	-	1318	2823
ENSDARG00000008912	ENSDART00000046362	5	6	6	AACTCCAGCTCTCCTTGTATTTGCT	7	-	1712	2823
ENSDARG00000008912	ENSDART00000046362	5	11	11	CTCCACTTCTGGACCAGGGGTGGCT	7	-	1974	2823
ENSDARG00000008912	ENSDART00000046362	5	14	14	TCCACCTACCGATGGCCGCCGCC	5	-	2696	2823
ENSDARG00000008912	ENSDART00000046362	5	14	14	GAAGGCAAAGATGGTGAAGAGTGT	6	-	2647	2823
ENSDARG00000008912	ENSDART00000046362	5	14	14	AGCAGCGACTTTACTTGCGAATGT	6	-	2461	2823
ENSDARG00000008912	ENSDART00000097698	5	2	2	AGAGCCAAATATAGGCGAAGATGCT	7	-	313	2403
ENSDARG00000008912	ENSDART00000097698	5	4	4	TTCAAAATCGTCCCCAGAGTTGGCG	7	-	996	2403
ENSDARG00000008912	ENSDART00000097698	5	4	4	GTCCCCAGAGTTGGCGGAGCCGTT	6	-	988	2403
ENSDARG00000008912	ENSDART00000097698	5	4	4	ATCGTCCCCAGAGTTGGCGGAGCC	6	-	991	2403
ENSDARG00000008912	ENSDART00000097698	5	4	4	AAAATCGTCCCCAGAGTTGGCGGA	6	-	994	2403
ENSDARG00000008912	ENSDART00000097698	5	5	5	AACTCCAGCTCTCCTTGTATTTGCT	7	-	1382	2403
ENSDARG00000008912	ENSDART00000097698	5	8	8	CTCCACTTCTGGACCAGGGGTGGCT	7	-	1554	2403
ENSDARG00000008912	ENSDART00000097698	5	11	11	AGCAGCGACTTTACTTGCGAATGT	6	-	2041	2403
ENSDARG00000008912	ENSDART00000097698	5	11	11	GAAGGCAAAGATGGTGAAGAGTGT	6	-	2227	2403
ENSDARG00000008912	ENSDART00000097698	5	11	11	TCCACCTACCGATGGCCGCCGCC	5	-	2276	2403
ENSDARG00000008912	ENSDART00000097699	5	1	1	TGCGGCAGCCACACAGGAAGCAGAA	7	-	23	2589
ENSDARG00000008912	ENSDART00000097699	5	3	3	AGAGCCAAATATAGGCGAAGATGCT	7	-	478	2589
ENSDARG00000008912	ENSDART00000097699	5	5	5	ATCGTCCCCAGAGTTGGCGGAGCC	6	-	1156	2589
ENSDARG00000008912	ENSDART00000097699	5	5	5	TTCAAAATCGTCCCCAGAGTTGGCG	7	-	1161	2589
ENSDARG00000008912	ENSDART00000097699	5	5	5	GTCCCCAGAGTTGGCGGAGCCGTT	6	-	1153	2589
ENSDARG00000008912	ENSDART00000097699	5	5	5	AAAATCGTCCCCAGAGTTGGCGGA	6	-	1159	2589
ENSDARG00000008912	ENSDART00000097699	5	6	6	AACTCCAGCTCTCCTTGTATTTGCT	7	-	1547	2589
ENSDARG00000008912	ENSDART00000097699	5	9	9	CTCCACTTCTGGACCAGGGGTGGCT	7	-	1740	2589
ENSDARG00000008912	ENSDART00000097699	5	12	12	TCCACCTACCGATGGCCGCCGCC	5	-	2462	2589
ENSDARG00000008912	ENSDART00000097699	5	12	12	GAAGGCAAAGATGGTGAAGAGTGT	6	-	2413	2589
ENSDARG00000008912	ENSDART00000097699	5	12	12	AGCAGCGACTTTACTTGCGAATGT	6	-	2227	2589
ENSDARG00000008912	ENSDART00000097700	5	1	1	TGCGGCAGCCACACAGGAAGCAGAA	7	-	38	2574
ENSDARG00000008912	ENSDART00000097700	5	3	3	AGAGCCAAATATAGGCGAAGATGCT	7	-	493	2574
ENSDARG00000008912	ENSDART00000097700	5	5	5	ATCGTCCCCAGAGTTGGCGGAGCC	6	-	1171	2574
ENSDARG00000008912	ENSDART00000097700	5	5	5	TTCAAAATCGTCCCCAGAGTTGGCG	7	-	1176	2574
ENSDARG00000008912	ENSDART00000097700	5	5	5	AAAATCGTCCCCAGAGTTGGCGGA	6	-	1174	2574
ENSDARG00000008912	ENSDART00000097700	5	5	5	GTCCCCAGAGTTGGCGGAGCCGTT	6	-	1168	2574
ENSDARG00000008912	ENSDART00000097700	5	6	6	AACTCCAGCTCTCCTTGTATTTGCT	7	-	1562	2574
ENSDARG00000008912	ENSDART00000097700	5	9	9	CTCCACTTCTGGACCAGGGGTGGCT	7	-	1725	2574
ENSDARG00000008912	ENSDART00000097700	5	12	12	TCCACCTACCGATGGCCGCCGCC	5	-	2447	2574
ENSDARG00000008912	ENSDART00000097700	5	12	12	GAAGGCAAAGATGGTGAAGAGTGT	6	-	2398	2574
ENSDARG00000008912	ENSDART00000097700	5	12	12	AGCAGCGACTTTACTTGCGAATGT	6	-	2212	2574
ENSDARG00000008912	ENSDART00000097701	5	1	1	GCCACCCGCACACACCTGTGGAGAG	7	-	84	2844
ENSDARG00000008912	ENSDART00000097701	5	1	1	TGCGGCAGCCACACAGGAAGCAGAA	7	-	188	2844
ENSDARG00000008912	ENSDART00000097701	5	1	1	CTCAAAGCAGGGTTTCTTGGGTC	5	-	143	2844
ENSDARG00000008912	ENSDART00000097701	5	1	1	TCCATCAGCACTACTGTTGCTGTC	6	-	121	2844
ENSDARG00000008912	ENSDART00000097701	5	3	3	AGAGCCAAATATAGGCGAAGATGCT	7	-	643	2844
ENSDARG00000008912	ENSDART00000097701	5	5	5	TTCAAAATCGTCCCCAGAGTTGGCG	7	-	1326	2844
ENSDARG00000008912	ENSDART00000097701	5	5	5	ATCGTCCCCAGAGTTGGCGGAGCC	6	-	1321	2844
ENSDARG00000008912	ENSDART00000097701	5	5	5	AAAATCGTCCCCAGAGTTGGCGGA	6	-	1324	2844
ENSDARG00000008912	ENSDART00000097701	5	5	5	GTCCCCAGAGTTGGCGGAGCCGTT	6	-	1318	2844
ENSDARG00000008912	ENSDART00000097701	5	6	6	AACTCCAGCTCTCCTTGTATTTGCT	7	-	1712	2844
ENSDARG00000008912	ENSDART00000097701	5	9	9	GCATTCAGATGATAGGGTGAGAA	5	-	1903	2844
ENSDARG00000008912	ENSDART00000097701	5	10	10	CTCCACTTCTGGACCAGGGGTGGCT	7	-	1995	2844
ENSDARG00000008912	ENSDART00000097701	5	13	13	TCCACCTACCGATGGCCGCCGCC	5	-	2717	2844
ENSDARG00000008912	ENSDART00000097701	5	13	13	GAAGGCAAAGATGGTGAAGAGTGT	6	-	2668	2844
ENSDARG00000008912	ENSDART00000097701	5	13	13	AGCAGCGACTTTACTTGCGAATGT	6	-	2482	2844
ENSDARG00000009081	ENSDART00000003444	5	3	3	CTCCAACTCCTGCTTTAGTTTGT	5	-	92	1905
ENSDARG00000009081	ENSDART00000003444	5	3	3	TTCTCCAACTCCTGCTTTAGTTTGT	7	-	92	1905
ENSDARG00000009081	ENSDART00000003444	5	4	4	CCCTTCTGCGTGCTTGGTGAGTTT	6	-	525	1905
ENSDARG00000009081	ENSDART00000003444	5	4	4	CCCTTCTGCGTGCTTGGTGAGTT	5	-	526	1905
ENSDARG00000009081	ENSDART00000003444	5	5	5	TGCTCATTAATATGGGGGAAGTG	5	-	669	1905
ENSDARG00000009081	ENSDART00000003444	5	6	6	CAAGTCCCACAAAGGGATGATTTG	6	-	905	1905
ENSDARG00000009081	ENSDART00000003444	5	6	6	CAAGTCCCACAAAGGGATGATTT	5	-	906	1905
ENSDARG00000009081	ENSDART00000003444	5	6	6	TCCCACAAAGGGATGATTTGTAG	5	-	902	1905
ENSDARG00000009081	ENSDART00000003444	5	6	6	TCCCACAAAGGGATGATTTGTAGCA	7	-	900	1905
ENSDARG00000009081	ENSDART00000003444	5	11	11	GGCTTCCCCACAGGAGACGCATCT	6	-	1796	1905
ENSDARG00000009081	ENSDART00000003444	5	11	11	CACGGCTTCCCCACAGGAGACGCA	6	-	1799	1905
ENSDARG00000009081	ENSDART00000041386	5	1	1	CAATGCGCACGCTGCTGCTGTTTTC	7	-	18	693
ENSDARG00000009081	ENSDART00000041386	5	3	3	TTCTCCAACTCCTGCTTTAGTTTGT	7	-	176	693
ENSDARG00000009081	ENSDART00000041386	5	3	3	CTCCAACTCCTGCTTTAGTTTGT	5	-	176	693
ENSDARG00000009081	ENSDART00000041386	5	4	4	CCCTTCTGCGTGCTTGGTGAGTTT	6	-	609	693
ENSDARG00000009081	ENSDART00000041386	5	4	4	CCCTTCTGCGTGCTTGGTGAGTT	5	-	610	693
ENSDARG00000009081	ENSDART00000097298	5	3	3	CTCCAACTCCTGCTTTAGTTTGT	5	-	116	420
ENSDARG00000009081	ENSDART00000097298	5	3	3	TTCTCCAACTCCTGCTTTAGTTTGT	7	-	116	420
ENSDARG00000009121	ENSDART00000020646	5	1	1	TTCATCTAATCCTTCTGCGATTAA	6	+	978	1416
ENSDARG00000009121	ENSDART00000020646	5	1	1	CTCTGCTACTCTGTCGAGGTGGAG	6	+	1373	1416
ENSDARG00000009121	ENSDART00000020646	5	1	1	CTCCAAAAACGGCAGCTGTCTTG	5	+	422	1416
ENSDARG00000009121	ENSDART00000020646	5	1	1	CGCTACAGAAATTCTGGAAGGGTTT	7	+	705	1416
ENSDARG00000009121	ENSDART00000020646	5	1	1	CCCTACAACATCATGGTTTTGGCC	6	+	1225	1416
ENSDARG00000009121	ENSDART00000020646	5	1	1	CCCTACAACATCATGGTTTTGGC	5	+	1225	1416
ENSDARG00000009121	ENSDART00000020646	5	1	1	AACTCCAAAAACGGCAGCTGTCTTG	7	+	420	1416
ENSDARG00000009169	ENSDART00000020568	5	2	2	TTCTTCGGCTTGAACGTCTTTGAC	6	-	33	645
ENSDARG00000009169	ENSDART00000020568	5	2	2	TTCCGCTGCCCAGCGTGGCCTCT	5	-	102	645
ENSDARG00000009169	ENSDART00000020568	5	3	3	TCCAGCAGACATTAATGGGCAGCT	6	-	253	645
ENSDARG00000009169	ENSDART00000020568	5	5	5	TGCCTCTTCCTGCAGCTGGATAA	5	-	515	645
ENSDARG00000009169	ENSDART00000020568	5	5	5	GCCACCGACATGAAGTTCTTTGGGA	7	-	425	645
ENSDARG00000009169	ENSDART00000020568	5	5	5	ACACACACCTGAACGAAGAAGAT	5	-	565	645
ENSDARG00000009169	ENSDART00000020568	5	6	6	TTCTCAATCAGCTCCTGAAGGGGTG	7	-	611	645
ENSDARG00000009169	ENSDART00000097615	5	2	2	TTCTTCGGCTTGAACGTCTTTGAC	6	-	36	648
ENSDARG00000009169	ENSDART00000097615	5	2	2	TTCCGCTGCCCAGCGTGGCCTCT	5	-	105	648
ENSDARG00000009169	ENSDART00000097615	5	3	3	TCCAGCAGACATTAATGGGCAGCT	6	-	256	648
ENSDARG00000009169	ENSDART00000097615	5	5	5	TGCCTCTTCCTGCAGCTGGATAA	5	-	518	648
ENSDARG00000009169	ENSDART00000097615	5	5	5	GCCACCGACATGAAGTTCTTTGGGA	7	-	428	648
ENSDARG00000009169	ENSDART00000097615	5	5	5	ACACACACCTGAACGAAGAAGAT	5	-	568	648
ENSDARG00000009169	ENSDART00000097615	5	6	6	TTCTCAATCAGCTCCTGAAGGGGTG	7	-	614	648
ENSDARG00000009196	ENSDART00000004286	5	3	2	TACCGCAGCTGCGAATGAAGCGGGA	7	-	54	1020
ENSDARG00000009196	ENSDART00000004286	5	3	2	CGCAGCTGCGAATGAAGCGGGAGCA	7	-	51	1020
ENSDARG00000009196	ENSDART00000004286	5	4	3	TGCAACATCTTCACTGACGTTGAA	6	-	112	1020
ENSDARG00000009196	ENSDART00000004286	5	4	3	TACCAACGCCTTCAATTGCTTTGCG	7	-	142	1020
ENSDARG00000009196	ENSDART00000004286	5	4	3	AACGCCTTCAATTGCTTTGCGGAG	6	-	139	1020
ENSDARG00000009196	ENSDART00000004286	5	4	3	AACATCTTCACTGACGTTGAAGTT	6	-	109	1020
ENSDARG00000009196	ENSDART00000004286	5	4	3	ACCAACGCCTTCAATTGCTTTGCG	6	-	142	1020
ENSDARG00000009196	ENSDART00000004286	5	5	4	TCCTGCTTCTGACTGCTGCTTCT	5	-	202	1020
ENSDARG00000009196	ENSDART00000004286	5	5	4	AGATTCACCCTCTTTGTGGTTTCT	6	-	243	1020
ENSDARG00000009196	ENSDART00000004286	5	5	4	AGATTCACCCTCTTTGTGGTTTC	5	-	244	1020
ENSDARG00000009196	ENSDART00000004286	5	7	6	CTCACCTTCAGCATATGCTGCAGAC	7	-	444	1020
ENSDARG00000009196	ENSDART00000004286	5	7	6	AGCTCCTTAATTTGTTTATTTGTC	6	-	420	1020
ENSDARG00000009196	ENSDART00000097859	5	2	2	TGCAACATCTTCACTGACGTTGAA	6	-	109	1017
ENSDARG00000009196	ENSDART00000097859	5	2	2	TACCAACGCCTTCAATTGCTTTGCG	7	-	139	1017
ENSDARG00000009196	ENSDART00000097859	5	2	2	ACCAACGCCTTCAATTGCTTTGCG	6	-	139	1017
ENSDARG00000009196	ENSDART00000097859	5	2	2	AACGCCTTCAATTGCTTTGCGGAG	6	-	136	1017
ENSDARG00000009196	ENSDART00000097859	5	2	2	AACATCTTCACTGACGTTGAAGTT	6	-	106	1017
ENSDARG00000009196	ENSDART00000097859	5	3	3	AGATTCACCCTCTTTGTGGTTTC	5	-	241	1017
ENSDARG00000009196	ENSDART00000097859	5	3	3	AGATTCACCCTCTTTGTGGTTTCT	6	-	240	1017
ENSDARG00000009196	ENSDART00000097859	5	3	3	TCCTGCTTCTGACTGCTGCTTCT	5	-	199	1017
ENSDARG00000009196	ENSDART00000097859	5	5	5	AGCTCCTTAATTTGTTTATTTGTC	6	-	417	1017
ENSDARG00000009196	ENSDART00000097859	5	5	5	CTCACCTTCAGCATATGCTGCAGAC	7	-	441	1017
ENSDARG00000009280	ENSDART00000027811	5	3	3	AAAAGCAAAGCAGTGGGAGAGGAT	6	+	475	1383
ENSDARG00000009280	ENSDART00000027811	5	4	4	TCCTCAATCACGGAGAGTGAGTA	5	+	638	1383
ENSDARG00000009280	ENSDART00000027811	5	5	5	GCCGTCAAACCCACCGAGGATGGA	6	+	823	1383
ENSDARG00000009280	ENSDART00000027811	5	5	5	GGCACCAAAGATGAGCTGATGAC	5	+	799	1383
ENSDARG00000009280	ENSDART00000027811	5	6	6	TTCTGCAGCCGTCTGCTGAAGTG	5	+	845	1383
ENSDARG00000009280	ENSDART00000027811	5	7	7	CTCAGCGCATGGTGGATGGATAC	5	+	1085	1383
ENSDARG00000009280	ENSDART00000027811	5	7	7	TCCTGCAGCAGTTCCAGGAGGCGGC	7	+	1052	1383
ENSDARG00000009280	ENSDART00000027811	5	9	9	AGCAAACCCATGAGCGTCGCTGGA	6	+	1366	1383
ENSDARG00000009280	ENSDART00000027811	5	9	9	GCAAACCCATGAGCGTCGCTGGA	5	+	1367	1383
ENSDARG00000009280	ENSDART00000084856	5	3	3	AAAAGCAAAGCAGTGGGAGAGGAT	6	+	490	1458
ENSDARG00000009280	ENSDART00000084856	5	4	4	TCCTCAATCACGGAGAGTGAGTA	5	+	653	1458
ENSDARG00000009280	ENSDART00000084856	5	6	6	GGCACCAAAGATGAGCTGATGAC	5	+	856	1458
ENSDARG00000009280	ENSDART00000084856	5	6	6	GCCGTCAAACCCACCGAGGATGGA	6	+	880	1458
ENSDARG00000009280	ENSDART00000084856	5	7	7	TTCTGCAGCCGTCTGCTGAAGTG	5	+	902	1458
ENSDARG00000009280	ENSDART00000084856	5	8	8	CTCAGCGCATGGTGGATGGATAC	5	+	1142	1458
ENSDARG00000009280	ENSDART00000084856	5	8	8	TCCTGCAGCAGTTCCAGGAGGCGGC	7	+	1109	1458
ENSDARG00000009280	ENSDART00000084856	5	10	10	GCAAACCCATGAGCGTCGCTGGA	5	+	1424	1458
ENSDARG00000009280	ENSDART00000084856	5	10	10	AGCAAACCCATGAGCGTCGCTGGA	6	+	1423	1458
ENSDARG00000009281	ENSDART00000003434	5	1	1	CCCACCACCGCGATTTGAGGCAGGT	7	-	98	2292
ENSDARG00000009281	ENSDART00000003434	5	1	1	CGCCCACCACCGCGATTTGAGGCA	6	-	101	2292
ENSDARG00000009281	ENSDART00000003434	5	1	1	GCCCACCACCGCGATTTGAGGCA	5	-	101	2292
ENSDARG00000009281	ENSDART00000003434	5	1	1	CACCACCGCGATTTGAGGCAGGT	5	-	98	2292
ENSDARG00000009281	ENSDART00000003434	5	4	4	TCCACCTCCTTGGCAATCTTGAGGG	7	-	566	2292
ENSDARG00000009281	ENSDART00000003434	5	5	5	TACCTCTGCGTAAGGGAAGAAGCT	6	-	677	2292
ENSDARG00000009281	ENSDART00000003434	5	6	6	GTTCACAACCCCAATGTAGCCTAC	6	-	694	2292
ENSDARG00000009281	ENSDART00000003434	5	7	7	TTATTCCTCAGTCCCGGCAGGGTGT	7	-	881	2292
ENSDARG00000009281	ENSDART00000003434	5	18	18	GTAAACTCCAGCTCGTAAGAAGGA	6	-	1864	2292
ENSDARG00000009281	ENSDART00000003434	5	18	18	AACTCCAGCTCGTAAGAAGGATGC	6	-	1861	2292
ENSDARG00000009281	ENSDART00000003434	5	18	18	AACTCCAACTGCCTGTAGTCTTT	5	-	1801	2292
ENSDARG00000009281	ENSDART00000003434	5	19	19	GAATCCACAAGGTTTCTGATGGT	5	-	1981	2292
ENSDARG00000009281	ENSDART00000003434	5	20	20	CGCAGCATCTCCTCCCTGTGCTGAG	7	-	2165	2292
ENSDARG00000009281	ENSDART00000003434	5	20	20	AGCATCTCCTCCCTGTGCTGAGCC	6	-	2163	2292
ENSDARG00000009281	ENSDART00000097330	5	1	1	GCCCACCACCGCGATTTGAGGCA	5	-	101	2508
ENSDARG00000009281	ENSDART00000097330	5	1	1	CACCACCGCGATTTGAGGCAGGT	5	-	98	2508
ENSDARG00000009281	ENSDART00000097330	5	1	1	CCCACCACCGCGATTTGAGGCAGGT	7	-	98	2508
ENSDARG00000009281	ENSDART00000097330	5	1	1	CGCCCACCACCGCGATTTGAGGCA	6	-	101	2508
ENSDARG00000009281	ENSDART00000097330	5	4	4	TCCACCTCCTTGGCAATCTTGAGGG	7	-	566	2508
ENSDARG00000009281	ENSDART00000097330	5	5	5	TACCTCTGCGTAAGGGAAGAAGCT	6	-	677	2508
ENSDARG00000009281	ENSDART00000097330	5	6	6	GTTCACAACCCCAATGTAGCCTAC	6	-	694	2508
ENSDARG00000009281	ENSDART00000097330	5	7	7	TTATTCCTCAGTCCCGGCAGGGTGT	7	-	881	2508
ENSDARG00000009281	ENSDART00000097330	5	12	12	ATCTCATCCTGAGGAGCGTTGGCA	6	-	1500	2508
ENSDARG00000009281	ENSDART00000097330	5	17	17	GTAAACTCCAGCTCGTAAGAAGGA	6	-	1867	2508
ENSDARG00000009281	ENSDART00000097330	5	17	17	AACTCCAGCTCGTAAGAAGGATGC	6	-	1864	2508
ENSDARG00000009281	ENSDART00000097330	5	17	17	AACTCCAACTGCCTGTAGTCTTT	5	-	1804	2508
ENSDARG00000009281	ENSDART00000097330	5	18	18	GAATCCACAAGGTTTCTGATGGT	5	-	1984	2508
ENSDARG00000009281	ENSDART00000097330	5	19	19	CGCAGCATCTCCTCCCTGTGCTGAG	7	-	2168	2508
ENSDARG00000009281	ENSDART00000097330	5	19	19	AGCATCTCCTCCCTGTGCTGAGCC	6	-	2166	2508
ENSDARG00000009281	ENSDART00000097330	5	20	20	TGCGTCCACCTGGACGAGGGGGTC	6	-	2366	2508
ENSDARG00000009336	ENSDART00000009500	5	2	2	TCCTCCAGCTTGTCCCTCTGCTGAG	7	-	62	444
ENSDARG00000009336	ENSDART00000009500	5	4	4	AAACTCTGCATATTTATCTGTGGAT	7	-	156	444
ENSDARG00000009336	ENSDART00000009500	5	5	5	ACAAAATCCCTGTAGTTGATGGT	5	-	307	444
ENSDARG00000009336	ENSDART00000009500	5	5	5	CACAAAATCCCTGTAGTTGATGGT	6	-	307	444
ENSDARG00000009336	ENSDART00000009500	5	5	5	TTCATCTGCAGATGAGTTTTTGGC	6	-	246	444
ENSDARG00000009336	ENSDART00000009500	5	5	5	TTCATCTGCAGATGAGTTTTTGGCA	7	-	245	444
ENSDARG00000009336	ENSDART00000009500	5	5	5	TTCTTCATCTGCAGATGAGTTTTTG	7	-	248	444
ENSDARG00000009418	ENSDART00000017012	5	2	2	GACCAACTCGGACATAGTGGAGGTC	7	+	261	1425
ENSDARG00000009418	ENSDART00000017012	5	7	7	GCCATCTCCACCTCGTATGGTAC	5	+	913	1425
ENSDARG00000009418	ENSDART00000017012	5	7	7	GGCGACCCCTGTGGTTTCTGTAGCG	7	+	846	1425
ENSDARG00000009418	ENSDART00000017012	5	8	8	CACTCAGTCAGCTGGGGTGAGCC	5	+	1058	1425
ENSDARG00000009418	ENSDART00000017012	5	9	9	ATCCGCCTCTCGGAAGGGTGGGCC	6	+	1408	1425
ENSDARG00000009418	ENSDART00000017012	5	9	9	AGCAGCACCACACCAGGCGGCTAC	6	+	1180	1425
ENSDARG00000009418	ENSDART00000044083	5	2	2	GACCAACTCGGACATAGTGGAGGTC	7	+	261	1422
ENSDARG00000009418	ENSDART00000044083	5	8	8	GGCGACCCCTGTGGTTTCTGTAGCG	7	+	843	1422
ENSDARG00000009418	ENSDART00000044083	5	8	8	GCCATCTCCACCTCGTATGGTAC	5	+	910	1422
ENSDARG00000009418	ENSDART00000044083	5	9	9	CACTCAGTCAGCTGGGGTGAGCC	5	+	1055	1422
ENSDARG00000009418	ENSDART00000044083	5	10	10	ATCCGCCTCTCGGAAGGGTGGGCC	6	+	1405	1422
ENSDARG00000009418	ENSDART00000044083	5	10	10	AGCAGCACCACACCAGGCGGCTAC	6	+	1177	1422
ENSDARG00000009418	ENSDART00000080168	5	2	2	GACCAACTCGGACATAGTGGAGGTC	7	+	261	1419
ENSDARG00000009418	ENSDART00000080168	5	3	3	ACAAACAGATTAACGAAGAGTTT	5	+	368	1419
ENSDARG00000009418	ENSDART00000080168	5	8	8	GCCATCTCCACCTCGTATGGTAC	5	+	907	1419
ENSDARG00000009418	ENSDART00000080168	5	8	8	GGCGACCCCTGTGGTTTCTGTAGCG	7	+	840	1419
ENSDARG00000009418	ENSDART00000080168	5	9	9	CACTCAGTCAGCTGGGGTGAGCC	5	+	1052	1419
ENSDARG00000009418	ENSDART00000080168	5	10	10	ATCCGCCTCTCGGAAGGGTGGGCC	6	+	1402	1419
ENSDARG00000009418	ENSDART00000080168	5	10	10	AGCAGCACCACACCAGGCGGCTAC	6	+	1174	1419
ENSDARG00000009418	ENSDART00000097431	5	2	2	GACCAACTCGGACATAGTGGAGGTC	7	+	261	1509
ENSDARG00000009418	ENSDART00000097431	5	7	7	AAATACTAAGAACTCTTTTGTGTTT	7	+	635	1509
ENSDARG00000009418	ENSDART00000097431	5	12	12	GGCGACCCCTGTGGTTTCTGTAGCG	7	+	930	1509
ENSDARG00000009418	ENSDART00000097431	5	12	12	GCCATCTCCACCTCGTATGGTAC	5	+	997	1509
ENSDARG00000009418	ENSDART00000097431	5	13	13	CACTCAGTCAGCTGGGGTGAGCC	5	+	1142	1509
ENSDARG00000009418	ENSDART00000097431	5	14	14	ATCCGCCTCTCGGAAGGGTGGGCC	6	+	1492	1509
ENSDARG00000009418	ENSDART00000097431	5	14	14	AGCAGCACCACACCAGGCGGCTAC	6	+	1264	1509
ENSDARG00000009418	ENSDART00000097432	5	2	2	GACCAACTCGGACATAGTGGAGGTC	7	+	261	1626
ENSDARG00000009418	ENSDART00000097432	5	4	4	ACAAACAGATTAACGAAGAGTTT	5	+	515	1626
ENSDARG00000009418	ENSDART00000097432	5	8	8	AAATACTAAGAACTCTTTTGTGTTT	7	+	776	1626
ENSDARG00000009418	ENSDART00000097432	5	12	12	GGCGACCCCTGTGGTTTCTGTAGCG	7	+	1047	1626
ENSDARG00000009418	ENSDART00000097432	5	12	12	GCCATCTCCACCTCGTATGGTAC	5	+	1114	1626
ENSDARG00000009418	ENSDART00000097432	5	13	13	CACTCAGTCAGCTGGGGTGAGCC	5	+	1259	1626
ENSDARG00000009418	ENSDART00000097432	5	14	14	ATCCGCCTCTCGGAAGGGTGGGCC	6	+	1609	1626
ENSDARG00000009418	ENSDART00000097432	5	14	14	AGCAGCACCACACCAGGCGGCTAC	6	+	1381	1626
ENSDARG00000009418	ENSDART00000097433	5	2	2	GACCAACTCGGACATAGTGGAGGTC	7	+	246	1425
ENSDARG00000009418	ENSDART00000097433	5	7	7	AGATACAGATACAGTGTGTGCATGC	7	+	789	1425
ENSDARG00000009418	ENSDART00000097433	5	8	8	GGCGACCCCTGTGGTTTCTGTAGCG	7	+	846	1425
ENSDARG00000009418	ENSDART00000097433	5	8	8	GCCATCTCCACCTCGTATGGTAC	5	+	913	1425
ENSDARG00000009418	ENSDART00000097433	5	9	9	CACTCAGTCAGCTGGGGTGAGCC	5	+	1058	1425
ENSDARG00000009418	ENSDART00000097433	5	10	10	AGCAGCACCACACCAGGCGGCTAC	6	+	1180	1425
ENSDARG00000009418	ENSDART00000097433	5	10	10	ATCCGCCTCTCGGAAGGGTGGGCC	6	+	1408	1425
ENSDARG00000009745	ENSDART00000023977	5	2	1	TCCCTCAGCTGCTTCATGCGCAGTT	7	-	389	1365
ENSDARG00000009745	ENSDART00000023977	5	2	1	GGCCAACTCTAACGGCAGCAGGC	5	-	182	1365
ENSDARG00000009745	ENSDART00000023977	5	2	1	CAACTCTAACGGCAGCAGGCGCA	5	-	179	1365
ENSDARG00000009745	ENSDART00000023977	5	2	1	CTAGACAGCAGGTGAGCAGGGTCT	6	-	233	1365
ENSDARG00000009745	ENSDART00000023977	5	7	6	CTCTCCAGAGAACCAGATGAATGC	6	-	1343	1365
ENSDARG00000009745	ENSDART00000023977	5	7	6	CTAAGCAGAGAGAGGCTGGAGGG	5	-	1108	1365
ENSDARG00000009745	ENSDART00000023977	5	7	6	CAAAACTAAGCAGAGAGAGGCTGGA	7	-	1111	1365
ENSDARG00000009745	ENSDART00000023977	5	7	6	AACCTCACCAAAACTAAGCAGAG	5	-	1121	1365
ENSDARG00000009745	ENSDART00000023977	5	7	6	AAACTAAGCAGAGAGAGGCTGGA	5	-	1111	1365
ENSDARG00000009764	ENSDART00000016995	5	1	1	TCCAAATAACTAATTTGTCGGCGGC	7	+	38	1545
ENSDARG00000009764	ENSDART00000016995	5	1	1	AGCTGCGACTCTACCCGCCTGAGTG	7	+	116	1545
ENSDARG00000009764	ENSDART00000016995	5	1	1	GTAAGCAGCGATCAGATGAGAAC	5	+	64	1545
ENSDARG00000009764	ENSDART00000016995	5	3	3	GGCAAAGGCACTCTCGCTTTTGGC	6	+	288	1545
ENSDARG00000009764	ENSDART00000016995	5	5	5	AACCCAACCTACACGTTTTGCTTTT	7	+	630	1545
ENSDARG00000009764	ENSDART00000016995	5	5	5	AACCTACACGTTTTGCTTTTGTG	5	+	635	1545
ENSDARG00000009764	ENSDART00000016995	5	6	6	GGCTCAGTCAACCATTGCTGCTGCT	7	+	828	1545
ENSDARG00000009764	ENSDART00000016995	5	6	6	GCAGCCAAAGAGCTAGAGGACGTC	6	+	787	1545
ENSDARG00000009913	ENSDART00000011192	5	3	3	TCCGCCAGATGACACGGCGACGGA	6	-	193	906
ENSDARG00000009913	ENSDART00000011192	5	4	4	TACAGCGCCGTCTTTGATGAAGGT	6	-	358	906
ENSDARG00000009913	ENSDART00000011192	5	4	4	AGCGCCGTCTTTGATGAAGGTGTG	6	-	355	906
ENSDARG00000009913	ENSDART00000011192	5	9	9	GGCGTCAACACACCGAGGTCTGT	5	-	856	906
ENSDARG00000009913	ENSDART00000011192	5	9	9	CAACACACCGAGGTCTGTGAAGAG	6	-	850	906
ENSDARG00000009939	ENSDART00000006451	5	3	3	GTCAACACCTTTTTCTTTAGTTTGT	7	-	341	1257
ENSDARG00000009939	ENSDART00000006451	5	9	9	CTCAACCTCTTGCACCTCTGCCTGC	7	-	744	1257
ENSDARG00000009939	ENSDART00000087859	5	3	3	GTCAACACCTTTTTCTTTAGTTTGT	7	-	341	1011
ENSDARG00000009939	ENSDART00000087859	5	9	9	CTCAACCTCTTGCACCTCTGCCTGC	7	-	744	1011
ENSDARG00000009939	ENSDART00000097677	5	3	3	GTCAACACCTTTTTCTTTAGTTTGT	7	-	341	1203
ENSDARG00000009939	ENSDART00000097677	5	8	8	CTCAACCTCTTGCACCTCTGCCTGC	7	-	690	1203
ENSDARG00000009950	ENSDART00000015940	5	1	1	TGCTTCGACTTGGACTGCGCGGCC	6	-	60	438
ENSDARG00000010031	ENSDART00000010851	5	4	4	CCCATCTCCATCCAGATGAATCT	5	-	344	2214
ENSDARG00000010031	ENSDART00000010851	5	5	5	ACAGGCTTAAAAACATGTAGTCTTC	7	-	389	2214
ENSDARG00000010031	ENSDART00000010851	5	8	8	TTATACTCCCTCAGGTTGCAGCT	5	-	748	2214
ENSDARG00000010031	ENSDART00000010851	5	9	9	AGCTCCTCCAAGTTGGATGCATTC	6	-	861	2214
ENSDARG00000010031	ENSDART00000010851	5	11	11	GTACTAGGCATTTAGAGTCGTTTTT	7	-	1045	2214
ENSDARG00000010031	ENSDART00000010851	5	11	11	GACTCACTCCCATCTTGCAGTGTAC	7	-	1066	2214
ENSDARG00000010031	ENSDART00000010851	5	12	12	GTTTCCAGAGTTTATTGTGTCTCT	6	-	1250	2214
ENSDARG00000010031	ENSDART00000010851	5	12	12	TTCCCAGCCAGCCTGTTGCTGTT	5	-	1825	2214
ENSDARG00000010031	ENSDART00000010851	5	12	12	AGAGACGCCGGAAGTAGTAGTTGTA	7	-	1441	2214
ENSDARG00000010031	ENSDART00000010851	5	12	12	GTCAAAGCCAGAAGGGCAGCTGCG	6	-	1849	2214
ENSDARG00000010031	ENSDART00000010851	5	12	12	CTCTCCTCCTGATCAGGGTGCAGCA	7	-	1349	2214
ENSDARG00000010031	ENSDART00000010851	5	12	12	CTCTTCTCCACAGCAGGGGGAAGCA	7	-	1398	2214
ENSDARG00000010031	ENSDART00000010851	5	15	15	GTCTCAATCTCTCGGGTGCGCTGGC	7	-	2105	2214
ENSDARG00000010031	ENSDART00000010851	5	15	15	GAACTCTTCGAACTCTCTGAAGAC	6	-	2066	2214
ENSDARG00000010064	ENSDART00000043820	5	2	2	ACCACCGACCCCTTCTTGTGGAAAC	7	+	159	288
ENSDARG00000010108	ENSDART00000014434	5	1	1	GCAACCGGCAATGTGCAGTGGAG	5	-	55	786
ENSDARG00000010108	ENSDART00000014434	5	1	1	CGCTGCCCCAGTAAGGAGGACGAG	6	-	139	786
ENSDARG00000010108	ENSDART00000014434	5	2	2	GAACAAACCTCTCGGTAGTTTTT	5	-	282	786
ENSDARG00000010108	ENSDART00000014434	5	2	2	ACAAACCTCTCGGTAGTTTTTGAG	6	-	279	786
ENSDARG00000010108	ENSDART00000014434	5	3	3	TGCTCAGGCGGATGTTGAGGAGGCG	7	-	736	786
ENSDARG00000010108	ENSDART00000014434	5	3	3	CACAGCGGCAGCACTGCCTTTTCT	6	-	603	786
ENSDARG00000010108	ENSDART00000014434	5	3	3	CAATCACTCTGCTCAGGCGGATGTT	7	-	745	786
ENSDARG00000010108	ENSDART00000014434	5	3	3	CAATCACTCTGCTCAGGCGGATGT	6	-	746	786
ENSDARG00000010108	ENSDART00000014434	5	3	3	AGAATCGGCCGAACACTGCGTGGAG	7	-	508	786
ENSDARG00000010248	ENSDART00000026020	5	6	5	TCCAAAACCTCAGACAGGGTGATGT	7	-	473	1014
ENSDARG00000010248	ENSDART00000026020	5	6	5	CAAAACCTCAGACAGGGTGATGTT	6	-	472	1014
ENSDARG00000010248	ENSDART00000026020	5	6	5	CAAAACCTCAGACAGGGTGATGT	5	-	473	1014
ENSDARG00000010248	ENSDART00000026020	5	8	7	ACCAGCCCAGTGAATGGGGCGAT	5	-	793	1014
ENSDARG00000010248	ENSDART00000026020	5	8	7	CTACCAGCCCAGTGAATGGGGCGAT	7	-	793	1014
ENSDARG00000010248	ENSDART00000026020	5	8	7	GACTGCCTCGTACAGACGAATCT	5	-	713	1014
ENSDARG00000010248	ENSDART00000026020	5	8	7	TTCCTACCAGCCCAGTGAATGGGGC	7	-	796	1014
ENSDARG00000010248	ENSDART00000026020	5	9	8	TTCTGCTGCAGAAAGGAGCTTTT	5	-	815	1014
ENSDARG00000010248	ENSDART00000026020	5	9	8	AACCCAAGAGTCTTCTGCTGCAGAA	7	-	825	1014
ENSDARG00000010484	ENSDART00000005447	5	1	1	CACAGCTACTTTCACTGAGGACGAC	7	-	15	3024
ENSDARG00000010484	ENSDART00000005447	5	3	3	ACCCTCAAAAGCATGAAGCAGCA	5	-	251	3024
ENSDARG00000010484	ENSDART00000005447	5	3	3	CCCTCAAAAGCATGAAGCAGCATCT	7	-	248	3024
ENSDARG00000010484	ENSDART00000005447	5	3	3	AGCAGCATCTCCTCGCCGATGTC	5	-	235	3024
ENSDARG00000010484	ENSDART00000005447	5	3	3	CTCAAAAGCATGAAGCAGCATCT	5	-	248	3024
ENSDARG00000010484	ENSDART00000005447	5	5	5	GTAACCGCCATTTTGGAGAGGTC	5	-	547	3024
ENSDARG00000010484	ENSDART00000005447	5	6	6	CACACCTTCTCGGTGTCTAGGCT	5	-	712	3024
ENSDARG00000010484	ENSDART00000005447	5	6	6	GTCTCATTCATGTTTGTGGCAGCA	6	-	624	3024
ENSDARG00000010484	ENSDART00000005447	5	12	12	CTCAGCGGCCTCCTCTTTGCTGAT	6	-	1339	3024
ENSDARG00000010484	ENSDART00000005447	5	18	18	CCCTGCTGCTCCTGTGTGGCGCT	5	-	1864	3024
ENSDARG00000010484	ENSDART00000005447	5	18	18	TGCTGCTCCTGTGTGGCGCTGCG	5	-	1861	3024
ENSDARG00000010484	ENSDART00000005447	5	18	18	TCCAGCAGCTCTTTCTGTGCATAG	6	-	1905	3024
ENSDARG00000010484	ENSDART00000005447	5	18	18	TCCCCCTGCTGCTCCTGTGTGGCG	6	-	1866	3024
ENSDARG00000010484	ENSDART00000005447	5	20	20	AGAATCATCTCCGCTGTCTGAATCT	7	-	2046	3024
ENSDARG00000010484	ENSDART00000005447	5	21	21	CTCCGCTTCCCGCTGCTGGGCAAAC	7	-	2165	3024
ENSDARG00000010484	ENSDART00000005447	5	21	21	CGCAGCTCCTCGACGCTGAGTCT	5	-	2257	3024
ENSDARG00000010484	ENSDART00000005447	5	21	21	CTCCTCGACGCTGAGTCTTTGTT	5	-	2252	3024
ENSDARG00000010484	ENSDART00000005447	5	22	22	TGCAGCTTCACCTCCTGCAGAATGT	7	-	2582	3024
ENSDARG00000010484	ENSDART00000005447	5	22	22	TTCCTCCTCCAGCTGCTGCTGCT	5	-	2502	3024
ENSDARG00000010484	ENSDART00000005447	5	22	22	TCCTCCTCCAGCTGCTGCTGCTGCA	7	-	2499	3024
ENSDARG00000010484	ENSDART00000005447	5	22	22	CACTTCCTCCTCCAGCTGCTGCT	5	-	2505	3024
ENSDARG00000010484	ENSDART00000005447	5	24	24	AGAATCCTCATTTCGTCTGTTGAC	6	-	2812	3024
ENSDARG00000010484	ENSDART00000005447	5	25	25	GAAAGCGTCCAGTTCCTGGTAGGAA	7	-	2935	3024
ENSDARG00000010507	ENSDART00000013709	5	1	1	ATCAGCCTCAACTATTAGTGGCT	5	+	1008	1086
ENSDARG00000010507	ENSDART00000013709	5	1	1	CTATGCATCAGTCCTTAAGCATAG	6	+	689	1086
ENSDARG00000010507	ENSDART00000013709	5	1	1	CTCAAAAAAAACTTTGCTTGATTC	6	+	444	1086
ENSDARG00000010507	ENSDART00000013709	5	1	1	GCATCAGCCTCAACTATTAGTGGCT	7	+	1006	1086
ENSDARG00000010591	ENSDART00000008994	5	2	2	ACCCCCTACCTGTAGTCTTGTGC	5	-	235	1650
ENSDARG00000010591	ENSDART00000008994	5	3	3	GCCGTCCACCCCCAATCTGCTGCA	6	-	341	1650
ENSDARG00000010591	ENSDART00000008994	5	3	3	TTCAGCTGCGAAGGGTCTGTAGTC	6	-	255	1650
ENSDARG00000010591	ENSDART00000008994	5	3	3	TCCACCCCCAATCTGCTGCAGTC	5	-	338	1650
ENSDARG00000010591	ENSDART00000008994	5	3	3	GTCCACCCCCAATCTGCTGCAGTC	6	-	338	1650
ENSDARG00000010591	ENSDART00000008994	5	3	3	CCCCCAATCTGCTGCAGTCGGGGAA	7	-	332	1650
ENSDARG00000010591	ENSDART00000008994	5	6	6	AAAGTCACCTGTAAGAGTAGATGGG	7	-	703	1650
ENSDARG00000010591	ENSDART00000008994	5	6	6	AACAAATTCTGGCTGTTGTAGTT	5	-	622	1650
ENSDARG00000010591	ENSDART00000008994	5	8	8	CCCAAAGACATCCCTTTCTGGAGGA	7	-	904	1650
ENSDARG00000010591	ENSDART00000008994	5	8	8	AAAGACATCCCTTTCTGGAGGAGCC	7	-	901	1650
ENSDARG00000010591	ENSDART00000008994	5	9	9	GTCAACAGACTTCTGTCTGCAGCT	6	-	1060	1650
ENSDARG00000010591	ENSDART00000008994	5	9	9	AGCTGCAGCTGAAGGTGCTGGTGCA	7	-	1190	1650
ENSDARG00000010591	ENSDART00000008994	5	9	9	GTCTGCAGCTCTCTGGTCTGTCTGT	7	-	1045	1650
ENSDARG00000010591	ENSDART00000031624	5	5	3	AACAAATTCTGGCTGTTGTAGTT	5	-	205	252
ENSDARG00000010591	ENSDART00000098817	5	4	4	AACAAATTCTGGCTGTTGTAGTT	5	-	229	276
ENSDARG00000010752	ENSDART00000002453	5	2	2	TGCCCAAACAGGGTGCCTGATTG	5	-	216	2070
ENSDARG00000010752	ENSDART00000002453	5	3	3	GCCAAAAGACTCCACTGCTTGGTC	6	-	340	2070
ENSDARG00000010752	ENSDART00000002453	5	3	3	AGACTCCACTGCTTGGTCGACGGC	6	-	334	2070
ENSDARG00000010752	ENSDART00000002453	5	3	3	CTCCACTGCTTGGTCGACGGCTTC	6	-	331	2070
ENSDARG00000010752	ENSDART00000002453	5	4	4	AGCATCTTCACCCAGAGTCGCATAC	7	-	486	2070
ENSDARG00000010752	ENSDART00000002453	5	6	6	TGCATCTTCACTCCTTTAGGATTC	6	-	795	2070
ENSDARG00000010752	ENSDART00000002453	5	6	6	GCAATCAGATTACTGTGCTGCATCT	7	-	812	2070
ENSDARG00000010752	ENSDART00000002453	5	8	8	CACTGCTGCTATGAGAGTGGGTT	5	-	1046	2070
ENSDARG00000010752	ENSDART00000002453	5	12	12	ATCAAAATCTCCCCTCTTGGGTG	5	-	1483	2070
ENSDARG00000010752	ENSDART00000002453	5	12	12	AAAATCTCCCCTCTTGGGTGAGGCT	7	-	1478	2070
ENSDARG00000010752	ENSDART00000002453	5	12	12	AAAATCTCCCCTCTTGGGTGAGGC	6	-	1479	2070
ENSDARG00000010752	ENSDART00000002453	5	14	14	TCCTCCTCCATCATAGTGTGGTTAC	7	-	1865	2070
ENSDARG00000010752	ENSDART00000002453	5	14	14	CTATCCCACTCTTTTTTGCCAAC	5	-	1821	2070
ENSDARG00000010770	ENSDART00000013309	5	3	3	GGCTTCGTCTTACGACGGGGTTTGT	7	-	368	942
ENSDARG00000010770	ENSDART00000013309	5	3	3	TTCGTCTTACGACGGGGTTTGTA	5	-	367	942
ENSDARG00000010770	ENSDART00000013309	5	9	9	ATCTTCACCCGACATCGGTGGCTCT	7	-	917	942
ENSDARG00000010902	ENSDART00000015287	5	1	1	GGCGTCACATTTGTTTTGCGGTA	5	+	12	1797
ENSDARG00000010902	ENSDART00000015287	5	4	4	TCCTTCACAAACATCGACGAGTAC	6	+	403	1797
ENSDARG00000010902	ENSDART00000015287	5	5	5	GCCAAAGGCCTCATGACTTTGCA	5	+	532	1797
ENSDARG00000010902	ENSDART00000015287	5	7	7	TTCAGCTGCGTTTGAGGTTTGTGC	6	+	960	1797
ENSDARG00000010902	ENSDART00000015287	5	8	8	CCCAGCTGCCGCACATGCAGGCGGC	7	+	1022	1797
ENSDARG00000010902	ENSDART00000015287	5	8	8	CACAACGCCAAAACTGTGGGAGAA	6	+	982	1797
ENSDARG00000010902	ENSDART00000015287	5	8	8	AGCTGCCGCACATGCAGGCGGCGCG	7	+	1025	1797
ENSDARG00000010902	ENSDART00000015287	5	8	8	ACACAACGCCAAAACTGTGGGAGAA	7	+	981	1797
ENSDARG00000010902	ENSDART00000015287	5	10	10	AAATCCTGCGGCTGGTCTGTATGC	6	+	1220	1797
ENSDARG00000010902	ENSDART00000015287	5	11	11	GACGCCAACGAACAGGTTTGTGC	5	+	1432	1797
ENSDARG00000010902	ENSDART00000015287	5	12	12	ACAGGCCTCCACAAGAAGCGTAA	5	+	1597	1797
ENSDARG00000010902	ENSDART00000015287	5	13	13	GAAAACCGCACCACTTTAGTCTTC	6	+	1627	1797
ENSDARG00000010902	ENSDART00000015287	5	13	13	TTAGTCTTCTTTCTGGGCGGCGTG	6	+	1642	1797
ENSDARG00000010902	ENSDART00000015287	5	13	13	AAAACCGCACCACTTTAGTCTTC	5	+	1628	1797
ENSDARG00000011065	ENSDART00000039571	5	4	4	CAAATCAAAGAGTAGGTAGTGGAA	6	-	259	1431
ENSDARG00000011065	ENSDART00000039571	5	6	6	AGCACCGCCTCCAGGATCTGCTGGA	7	-	356	1431
ENSDARG00000011065	ENSDART00000039571	5	6	6	CACCGCCTCCAGGATCTGCTGGA	5	-	356	1431
ENSDARG00000011065	ENSDART00000039571	5	9	9	AGCTCCAGCTTTGATCTGTTGGT	5	-	674	1431
ENSDARG00000011065	ENSDART00000039571	5	10	10	GCAGACCCATGGGTGTTTGAGAG	5	-	803	1431
ENSDARG00000011065	ENSDART00000039571	5	10	10	GTACGCAGACCCATGGGTGTTTGAG	7	-	805	1431
ENSDARG00000011065	ENSDART00000039571	5	17	17	TTCAAAGTCGCCATTGTTGATGGC	6	-	1084	1431
ENSDARG00000011065	ENSDART00000039571	5	18	18	GTTCTCAAAGTAAAATCTGTGGAA	6	-	1186	1431
ENSDARG00000011065	ENSDART00000039571	5	19	19	GCCATCCACATACTGTGTGAGGCG	6	-	1303	1431
ENSDARG00000011065	ENSDART00000039571	5	19	19	GCCATCCACATACTGTGTGAGGC	5	-	1304	1431
ENSDARG00000011065	ENSDART00000039571	5	19	19	CACTGCAGAGGGGCAGCAGGAGCT	6	-	1419	1431
ENSDARG00000011065	ENSDART00000044753	5	4	4	CAAATCAAAGAGTAGGTAGTGGAA	6	-	259	1038
ENSDARG00000011065	ENSDART00000044753	5	6	6	AGCACCGCCTCCAGGATCTGCTGGA	7	-	356	1038
ENSDARG00000011065	ENSDART00000044753	5	6	6	CACCGCCTCCAGGATCTGCTGGA	5	-	356	1038
ENSDARG00000011065	ENSDART00000044753	5	9	9	AGCTCCAGCTTTGATCTGTTGGT	5	-	674	1038
ENSDARG00000011065	ENSDART00000044753	5	10	10	GCAGACCCATGGGTGTTTGAGAG	5	-	803	1038
ENSDARG00000011065	ENSDART00000044753	5	10	10	GTACGCAGACCCATGGGTGTTTGAG	7	-	805	1038
ENSDARG00000011065	ENSDART00000044753	5	13	13	AGCCGCGGCTACTGCAGCCGCAGCC	7	-	993	1038
ENSDARG00000011065	ENSDART00000044753	5	13	13	TGCAGCCGCGGCTACTGCAGCCGCA	7	-	996	1038
ENSDARG00000011065	ENSDART00000044753	5	13	13	TCCACCAGCCCTGCTGTGGTGCC	5	-	1021	1038
ENSDARG00000011065	ENSDART00000044753	5	13	13	GGCTACTGCAGCCGCAGCCGCAGTG	7	-	987	1038
ENSDARG00000011065	ENSDART00000044753	5	13	13	GCAGCCGCAGTGACCGAGGCGGGA	6	-	975	1038
ENSDARG00000011065	ENSDART00000044753	5	13	13	CGCGGCTACTGCAGCCGCAGCCGCA	7	-	990	1038
ENSDARG00000011065	ENSDART00000044753	5	13	13	CGCAGCCGCAGTGACCGAGGCGGGA	7	-	975	1038
ENSDARG00000011065	ENSDART00000098667	5	4	4	CAAATCAAAGAGTAGGTAGTGGAA	6	-	259	1854
ENSDARG00000011065	ENSDART00000098667	5	6	6	CACCGCCTCCAGGATCTGCTGGA	5	-	356	1854
ENSDARG00000011065	ENSDART00000098667	5	6	6	AGCACCGCCTCCAGGATCTGCTGGA	7	-	356	1854
ENSDARG00000011065	ENSDART00000098667	5	9	9	AGCTCCAGCTTTGATCTGTTGGT	5	-	674	1854
ENSDARG00000011065	ENSDART00000098667	5	10	10	GCAGACCCATGGGTGTTTGAGAG	5	-	803	1854
ENSDARG00000011065	ENSDART00000098667	5	10	10	GTACGCAGACCCATGGGTGTTTGAG	7	-	805	1854
ENSDARG00000011065	ENSDART00000098667	5	17	17	GGCAGCAACAACAGCTGGAGTGGTA	7	-	1233	1854
ENSDARG00000011065	ENSDART00000098667	5	17	17	TCCCCCCTCAGCGTCAGATGTGGGC	7	-	1203	1854
ENSDARG00000011065	ENSDART00000098667	5	17	17	AGCAACAACAGCTGGAGTGGTAG	5	-	1232	1854
ENSDARG00000011065	ENSDART00000098667	5	17	17	AGCAACAACAGCTGGAGTGGTAGTG	7	-	1230	1854
ENSDARG00000011065	ENSDART00000098667	5	17	17	AACAACAGCTGGAGTGGTAGTGGTT	7	-	1227	1854
ENSDARG00000011065	ENSDART00000098667	5	19	19	TTCAAAGTCGCCATTGTTGATGGC	6	-	1507	1854
ENSDARG00000011065	ENSDART00000098667	5	20	20	GTTCTCAAAGTAAAATCTGTGGAA	6	-	1609	1854
ENSDARG00000011065	ENSDART00000098667	5	21	21	GCCATCCACATACTGTGTGAGGCG	6	-	1726	1854
ENSDARG00000011065	ENSDART00000098667	5	21	21	GCCATCCACATACTGTGTGAGGC	5	-	1727	1854
ENSDARG00000011065	ENSDART00000098667	5	21	21	CACTGCAGAGGGGCAGCAGGAGCT	6	-	1842	1854
ENSDARG00000011091	ENSDART00000016418	5	1	1	CACACCAACACATTGCCGAAGAC	5	-	148	1356
ENSDARG00000011091	ENSDART00000016418	5	1	1	GGCCTCACAGCCTGTGCAGTTGAG	6	-	70	1356
ENSDARG00000011091	ENSDART00000016418	5	4	4	GTAGACAACAAAAGCGGGGTTGGCA	7	-	564	1356
ENSDARG00000011091	ENSDART00000016418	5	4	4	GTAGACAACAAAAGCGGGGTTGGC	6	-	565	1356
ENSDARG00000011091	ENSDART00000016418	5	6	6	CACATCACCACCCTGGTGCAGGA	5	-	839	1356
ENSDARG00000011091	ENSDART00000016418	5	6	6	CAAGTCGACGACTAGCGAGGATGCC	7	-	909	1356
ENSDARG00000011091	ENSDART00000082562	5	1	1	CACACCAACACATTGCCGAAGAC	5	-	52	1257
ENSDARG00000011091	ENSDART00000082562	5	4	4	GTAGACAACAAAAGCGGGGTTGGC	6	-	469	1257
ENSDARG00000011091	ENSDART00000082562	5	4	4	GTAGACAACAAAAGCGGGGTTGGCA	7	-	468	1257
ENSDARG00000011091	ENSDART00000082562	5	8	8	TACTCCTAATTGTGAAGTGGGTGCA	7	-	721	1257
ENSDARG00000011091	ENSDART00000082562	5	9	9	CAAGTCGACGACTAGCGAGGATGCC	7	-	810	1257
ENSDARG00000011168	ENSDART00000006947	5	3	3	GCACTCTGCTGATAAGCCGCTTTG	6	-	234	1032
ENSDARG00000011168	ENSDART00000006947	5	4	4	AAAAGCATCATATTCAGAAGGGGTC	7	-	342	1032
ENSDARG00000011168	ENSDART00000006947	5	4	4	CACCACATCCTCAAGATGGGAGGAA	7	-	303	1032
ENSDARG00000011168	ENSDART00000006947	5	8	8	TCCTGCCTCAAACAAAGCCTGAAAC	7	-	609	1032
ENSDARG00000011168	ENSDART00000006947	5	9	9	CAAACCATCTTTGCTTAATTGGCT	6	-	724	1032
ENSDARG00000011168	ENSDART00000073931	5	1	1	GCACTCTGCTGATAAGCCGCTTTG	6	-	78	705
ENSDARG00000011168	ENSDART00000073931	5	2	2	CACCACATCCTCAAGATGGGAGGAA	7	-	147	705
ENSDARG00000011168	ENSDART00000073931	5	2	2	AAAAGCATCATATTCAGAAGGGGTC	7	-	186	705
ENSDARG00000011168	ENSDART00000073931	5	4	4	TCCTGCCTCAAACAAAGCCTGAAAC	7	-	282	705
ENSDARG00000011168	ENSDART00000073931	5	5	5	CAAACCATCTTTGCTTAATTGGCT	6	-	397	705
ENSDARG00000011168	ENSDART00000097301	5	2	2	GCACTCTGCTGATAAGCCGCTTTG	6	-	150	945
ENSDARG00000011168	ENSDART00000097301	5	4	4	CACCACATCCTCAAGATGGGAGGAA	7	-	216	945
ENSDARG00000011168	ENSDART00000097301	5	4	4	AAAAGCATCATATTCAGAAGGGGTC	7	-	255	945
ENSDARG00000011168	ENSDART00000097301	5	8	8	TCCTGCCTCAAACAAAGCCTGAAAC	7	-	522	945
ENSDARG00000011168	ENSDART00000097301	5	9	9	CAAACCATCTTTGCTTAATTGGCT	6	-	637	945
ENSDARG00000011184	ENSDART00000002730	5	2	1	TCCTCCAAAAACTTCTGTGACTTC	6	+	361	1677
ENSDARG00000011184	ENSDART00000002730	5	2	1	TACGCCAACCAATTGGTAAGCGTCT	7	+	197	1677
ENSDARG00000011184	ENSDART00000002730	5	2	1	GAAGGCAACAGGGAAGATGTATGC	6	+	636	1677
ENSDARG00000011184	ENSDART00000002730	5	2	1	CGCCAACCAATTGGTAAGCGTCT	5	+	199	1677
ENSDARG00000011184	ENSDART00000002730	5	2	1	AGAGCCAGCCTGTTGCTGAAGAC	5	+	551	1677
ENSDARG00000011184	ENSDART00000002730	5	4	3	TTACACAGCTCAGATAATTTGTG	5	+	897	1677
ENSDARG00000011184	ENSDART00000002730	5	4	3	TGCACCAGCACAGGATTGTGTATAG	7	+	932	1677
ENSDARG00000011184	ENSDART00000002730	5	6	5	GTAGACTACTTCACGCTTGGGGT	5	+	1126	1677
ENSDARG00000011184	ENSDART00000002730	5	8	7	AGAAGCAAAAGGAGGGGGATGTG	5	+	1656	1677
ENSDARG00000011184	ENSDART00000002730	5	8	7	TACCAATTCCATGGCAGGAGGAGAT	7	+	1550	1677
ENSDARG00000011239	ENSDART00000018117	5	3	3	TACTGCTGCAGCTTTGCAGAAGAG	6	-	272	456
ENSDARG00000011239	ENSDART00000018117	5	4	4	AGACCATGCAGCTTTTGCAGCAGCT	7	-	317	456
ENSDARG00000011487	ENSDART00000013229	5	1	1	TACCCAGCAGCAACAGCTTGAGCT	6	-	107	1125
ENSDARG00000011487	ENSDART00000013229	5	1	1	GTACCCAGCAGCAACAGCTTGAGCT	7	-	107	1125
ENSDARG00000011487	ENSDART00000013229	5	2	2	GTCTTCTTCTGAATAGCCTGAGCC	6	-	181	1125
ENSDARG00000011487	ENSDART00000013229	5	3	3	CGCATCTACATAGGGGTTGACGAA	6	-	373	1125
ENSDARG00000011487	ENSDART00000013229	5	4	4	AGATTCACCTGAATATGACGCTTTG	7	-	592	1125
ENSDARG00000011487	ENSDART00000013229	5	6	6	GTCCTAAACAATGCTTTGCTTTC	5	-	751	1125
ENSDARG00000011555	ENSDART00000018792	5	2	2	ACCTTCTTCCTGAACTCTGCTTTC	6	-	141	573
ENSDARG00000011555	ENSDART00000018792	5	2	2	AGCTTCTTCAGTCTGGCTGCTTGT	6	-	96	573
ENSDARG00000011555	ENSDART00000018792	5	6	6	GTTCCAATCAGATGGCTGTATTT	5	-	505	573
ENSDARG00000011555	ENSDART00000018792	5	6	6	GGCGGCGTCTTTAGCAGCAGATGTT	7	-	525	573
ENSDARG00000011555	ENSDART00000018792	5	6	6	GGCGACGCAGGCCTTTTCTGAGTGT	7	-	461	573
ENSDARG00000011555	ENSDART00000018792	5	6	6	CGCTTCCTCCTCCAGTGCTGCCTTT	7	-	429	573
ENSDARG00000011701	ENSDART00000007555	5	2	1	GCCTCACTCGTCACACTGTGCATAA	7	+	22	1011
ENSDARG00000011701	ENSDART00000007555	5	2	1	GCAGGCAGAATGCTGTTGTTTGC	5	+	1	1011
ENSDARG00000011701	ENSDART00000007555	5	2	1	GAAAAAAGCTATCATGAGGTGGGA	6	+	118	1011
ENSDARG00000011701	ENSDART00000007555	5	2	1	ACCCTAGACCAGAAGTTAGATGAC	6	+	67	1011
ENSDARG00000011701	ENSDART00000007555	5	3	2	GCAAACACACCTTCAGACTGGGAA	6	+	215	1011
ENSDARG00000011701	ENSDART00000007555	5	3	2	GGCAAACACACCTTCAGACTGGGAA	7	+	214	1011
ENSDARG00000011701	ENSDART00000007555	5	6	5	TGCTGCAAATGTCACCGGTTTTGTT	7	+	672	1011
ENSDARG00000011783	ENSDART00000039143	5	2	2	ACAACCAGAGCAGTGGATGAAGAA	6	-	181	3591
ENSDARG00000011783	ENSDART00000039143	5	4	4	GTACTCATCATAGATGATGCTGTA	6	-	385	3591
ENSDARG00000011783	ENSDART00000039143	5	5	5	GTCTCATACTGTCGTTGCGTGTTG	6	-	549	3591
ENSDARG00000011783	ENSDART00000039143	5	8	8	AGACTCACCTTGAAGCGGCTGGT	5	-	925	3591
ENSDARG00000011783	ENSDART00000039143	5	10	10	TGCCACGGCAACCGGTCGATGGG	5	-	1082	3591
ENSDARG00000011783	ENSDART00000039143	5	10	10	CACGGCAACCGGTCGATGGGCGGAG	7	-	1077	3591
ENSDARG00000011783	ENSDART00000039143	5	11	11	GCATTCAAACACTGTCTGCCTCT	5	-	1171	3591
ENSDARG00000011783	ENSDART00000039143	5	13	13	TGCCTCGACCGATGGGTGGGTGAC	6	-	1424	3591
ENSDARG00000011783	ENSDART00000039143	5	16	16	GAAGTCCTCCAGGAGGCGGTGGA	5	-	1814	3591
ENSDARG00000011783	ENSDART00000039143	5	16	16	GAAGTCCTCCAGGAGGCGGTGGAA	6	-	1813	3591
ENSDARG00000011783	ENSDART00000039143	5	16	16	ACAGGCCTCTAAAACATCTGTGTCT	7	-	1692	3591
ENSDARG00000011783	ENSDART00000039143	5	16	16	GGCCTCTAAAACATCTGTGTCTGT	6	-	1690	3591
ENSDARG00000011783	ENSDART00000039143	5	18	18	TTAAAAGTCTGTAGTTGCTGGTGAA	7	-	1945	3591
ENSDARG00000011783	ENSDART00000039143	5	21	21	GGCATCGCAGAGAATGGTGAAGGC	6	-	2179	3591
ENSDARG00000011783	ENSDART00000039143	5	23	23	TGCCAATAAGTTCCTGCGTCTGT	5	-	2396	3591
ENSDARG00000011783	ENSDART00000039143	5	25	25	TTAATCCCACAGAAAGCAGATGTG	6	-	2643	3591
ENSDARG00000011783	ENSDART00000039143	5	25	25	TCCCACAGAAAGCAGATGTGGAG	5	-	2640	3591
ENSDARG00000011783	ENSDART00000039143	5	25	25	TCCCACAGAAAGCAGATGTGGAGCG	7	-	2638	3591
ENSDARG00000011783	ENSDART00000039143	5	26	26	GCCCTCACCCTGTGGACTGGGTT	5	-	2771	3591
ENSDARG00000011783	ENSDART00000039143	5	26	26	TCCTGCCTCAGTAGTTTGGAGGA	5	-	2839	3591
ENSDARG00000011783	ENSDART00000039143	5	27	27	ACACACACCATCGGGCAGTTTTC	5	-	3062	3591
ENSDARG00000011783	ENSDART00000039143	5	28	28	TACCCCTGCTCTGGCCGGAGCTTCT	7	-	3197	3591
ENSDARG00000011783	ENSDART00000039143	5	29	29	TGCGGCTGCTGCAGGGGTGTGTGT	6	-	3237	3591
ENSDARG00000011783	ENSDART00000039143	5	29	29	GGCTGCTGCAGGGGTGTGTGTTGCG	7	-	3233	3591
ENSDARG00000011783	ENSDART00000039143	5	29	29	GGCTGCTGCAGGGGTGTGTGTTG	5	-	3235	3591
ENSDARG00000011783	ENSDART00000039143	5	30	30	GCACTCACATAGTGTGCTGAATGT	6	-	3356	3591
ENSDARG00000011783	ENSDART00000039143	5	30	30	CTCTCCTGCTGCTGCTTTTGGGCC	6	-	3300	3591
ENSDARG00000011783	ENSDART00000039143	5	31	31	ATCAGCCCACTGCCACGGCGACTGC	7	-	3368	3591
ENSDARG00000011783	ENSDART00000045782	5	1	1	AAAGTCTGCTTGAAGCTCTTGAGCT	7	-	18	3789
ENSDARG00000011783	ENSDART00000045782	5	6	6	ACAACCAGAGCAGTGGATGAAGAA	6	-	349	3789
ENSDARG00000011783	ENSDART00000045782	5	8	8	GTACTCATCATAGATGATGCTGTA	6	-	553	3789
ENSDARG00000011783	ENSDART00000045782	5	9	9	GTCTCATACTGTCGTTGCGTGTTG	6	-	717	3789
ENSDARG00000011783	ENSDART00000045782	5	12	12	AGACTCACCTTGAAGCGGCTGGT	5	-	1093	3789
ENSDARG00000011783	ENSDART00000045782	5	14	14	TGCCACGGCAACCGGTCGATGGG	5	-	1250	3789
ENSDARG00000011783	ENSDART00000045782	5	14	14	CACGGCAACCGGTCGATGGGCGGAG	7	-	1245	3789
ENSDARG00000011783	ENSDART00000045782	5	15	15	GCATTCAAACACTGTCTGCCTCT	5	-	1339	3789
ENSDARG00000011783	ENSDART00000045782	5	17	17	TGCCTCGACCGATGGGTGGGTGAC	6	-	1592	3789
ENSDARG00000011783	ENSDART00000045782	5	20	20	ACAGGCCTCTAAAACATCTGTGTCT	7	-	1860	3789
ENSDARG00000011783	ENSDART00000045782	5	20	20	GGCCTCTAAAACATCTGTGTCTGT	6	-	1858	3789
ENSDARG00000011783	ENSDART00000045782	5	20	20	GAAGTCCTCCAGGAGGCGGTGGA	5	-	1982	3789
ENSDARG00000011783	ENSDART00000045782	5	20	20	GAAGTCCTCCAGGAGGCGGTGGAA	6	-	1981	3789
ENSDARG00000011783	ENSDART00000045782	5	22	22	TTAAAAGTCTGTAGTTGCTGGTGAA	7	-	2113	3789
ENSDARG00000011783	ENSDART00000045782	5	25	25	GGCATCGCAGAGAATGGTGAAGGC	6	-	2347	3789
ENSDARG00000011783	ENSDART00000045782	5	26	26	TGCCAATAAGTTCCTGCGTCTGT	5	-	2564	3789
ENSDARG00000011783	ENSDART00000045782	5	28	28	TCCCACAGAAAGCAGATGTGGAGCG	7	-	2806	3789
[truncated: 16,886 more rows]
