# Supplementary material for: Rapid Mutation of Endogenous Zebrafish Genes Using Zinc Finger Nucleases Made by Oligomerized Pool ENgineering (OPEN)
Source: PLoS One. 2009 Feb 9;4(2):e4348. doi: 10.1371/journal.pone.0004348 (PMC2634973; doi:10.1371/journal.pone.0004348)
Supplement: Table S7 — Potential OPEN ZFN target sites in gene transcripts encoded on zebrafish chromosome 7. Data presented as described in the legend to Table S1. (2.80 MB XLS) [file pone.0004348.s007.xls]

## Sheet: Chromosome7
Gene ID	Transcript ID	Chromosome Number	Exon Number	Coding Exon Number	TargetSite	ZFN Spacer Length	Strand	ZFN Cleavage Site	Coding Sequence Length
ENSDARG00000000423	ENSDART00000000436	7	5	4	TTCCAAACCTTTTCCTGTGGGTCT	6	-	330	1194
ENSDARG00000000423	ENSDART00000000436	7	7	6	AAAGTCATCGAAGAACTGGTGAGGT	7	-	612	1194
ENSDARG00000000423	ENSDART00000000436	7	11	10	GTATTCTTCTGTGTGCTGGAGGG	5	-	1180	1194
ENSDARG00000000423	ENSDART00000075241	7	4	4	TTCCAAACCTTTTCCTGTGGGTCT	6	-	330	1107
ENSDARG00000000423	ENSDART00000075241	7	6	6	AAAGTCATCGAAGAACTGGTGAGGT	7	-	612	1107
ENSDARG00000000423	ENSDART00000075241	7	11	11	GTATTCTTCTGTGTGCTGGAGGG	5	-	1093	1107
ENSDARG00000000442	ENSDART00000005261	7	8	7	ACCTGCCCCATGCTGTGATTGAGAG	7	-	981	1167
ENSDARG00000000442	ENSDART00000005261	7	8	7	GACTCCCCCTAATGCTGTGGAGAG	6	-	934	1167
ENSDARG00000000442	ENSDART00000005261	7	10	9	AACAACAGCAGAACCTGCAGAAGAG	7	-	1109	1167
ENSDARG00000000460	ENSDART00000060383	7	2	2	CACTGCAACATACTATTGTGTTGCA	7	+	327	939
ENSDARG00000000460	ENSDART00000060383	7	3	3	ATCTACTACTGCGCTGTGGCTGCT	6	+	649	939
ENSDARG00000000460	ENSDART00000060383	7	3	3	ATCTACTACTGCGCTGTGGCTGC	5	+	649	939
ENSDARG00000000460	ENSDART00000060383	7	3	3	CCCGCCATCTACTACTGCGCTGTG	6	+	643	939
ENSDARG00000000460	ENSDART00000060383	7	3	3	GACAAATACTGTTTGGAGATGTG	5	+	677	939
ENSDARG00000000460	ENSDART00000060383	7	3	3	GCCATCTACTACTGCGCTGTGGCT	6	+	646	939
ENSDARG00000000460	ENSDART00000060383	7	3	3	TACTACTGCGCTGTGGCTGCTTGT	6	+	652	939
ENSDARG00000000767	ENSDART00000000841	7	2	2	GCAAACAGAGGAAATGTTTGAAAC	6	+	54	798
ENSDARG00000000767	ENSDART00000000841	7	4	4	TCCAGCGCAGCTCAGATGAGGAA	5	+	386	798
ENSDARG00000000767	ENSDART00000000841	7	5	5	CACCTACCAGTTCAGTGGAGAGGTT	7	+	747	798
ENSDARG00000000767	ENSDART00000036729	7	3	3	GCAAACAGAGGAAATGTTTGAAAC	6	+	147	891
ENSDARG00000000767	ENSDART00000036729	7	5	5	TCCAGCGCAGCTCAGATGAGGAA	5	+	479	891
ENSDARG00000000767	ENSDART00000036729	7	6	6	CACCTACCAGTTCAGTGGAGAGGTT	7	+	840	891
ENSDARG00000000861	ENSDART00000021013	7	2	2	AAATTCTGCCAGTCTTTGGAGAT	5	+	154	3546
ENSDARG00000000861	ENSDART00000021013	7	6	6	TGCCCAATCTTCGTGAGCTGTGGTT	7	+	437	3546
ENSDARG00000000861	ENSDART00000021013	7	7	7	TGCGGCAGCTGGTTTGCTTGGAC	5	+	506	3546
ENSDARG00000000861	ENSDART00000021013	7	9	9	GCCTGCAGAGCTGGGCGGATGTG	5	+	831	3546
ENSDARG00000000861	ENSDART00000021013	7	9	9	CTCTTCCGCGCTCACTTGGGAAGCT	7	+	758	3546
ENSDARG00000000861	ENSDART00000021013	7	11	11	TGCGGCAGACAAGAGGGTGAGCG	5	+	1239	3546
ENSDARG00000000861	ENSDART00000021013	7	11	11	GACTGCGGCAGACAAGAGGGTGAG	6	+	1236	3546
ENSDARG00000000861	ENSDART00000021013	7	11	11	GACTCCAAACATGAAGAGGAAGAT	6	+	1207	3546
ENSDARG00000000861	ENSDART00000021013	7	11	11	GACGACTCCAAACATGAAGAGGAA	6	+	1204	3546
ENSDARG00000000861	ENSDART00000021013	7	11	11	CTCCAAACATGAAGAGGAAGATGAT	7	+	1209	3546
ENSDARG00000000861	ENSDART00000021013	7	12	12	ATCCCCAGATGCTGAGGTGAGTGC	6	+	1368	3546
ENSDARG00000000861	ENSDART00000021013	7	13	13	CCCATCATCCGTGGTGGTGATGAG	6	+	1408	3546
ENSDARG00000000861	ENSDART00000021013	7	13	13	CCCAAACCAGAGACAGTCGCCGCC	6	+	1573	3546
ENSDARG00000000861	ENSDART00000021013	7	13	13	ACAGCCTACTGTGCACTTTGCTGAA	7	+	1380	3546
ENSDARG00000000861	ENSDART00000021013	7	13	13	GCCCAAACCAGAGACAGTCGCCGCC	7	+	1572	3546
ENSDARG00000000861	ENSDART00000021013	7	15	15	TCCCTATAAAGGTGACGATGAGGTA	7	+	1767	3546
ENSDARG00000000861	ENSDART00000021013	7	15	15	TTAGGCATCAGCATAGCAGGAGGG	6	+	1732	3546
ENSDARG00000000861	ENSDART00000021013	7	17	17	GGCTTCAGCATTGCTGGTGGGAA	5	+	2143	3546
ENSDARG00000000861	ENSDART00000021013	7	17	17	TTAGGCTTCAGCATTGCTGGTGGG	6	+	2140	3546
ENSDARG00000000861	ENSDART00000021013	7	17	17	ATCACCACCACACCGTTGCGGCC	5	+	1987	3546
ENSDARG00000000861	ENSDART00000021013	7	17	17	GCATCATACAGCTGTTGAAGCTTTG	7	+	1896	3546
ENSDARG00000000861	ENSDART00000021013	7	18	18	GACAACATCCTGCAAGTGGGAGAC	6	+	2242	3546
ENSDARG00000000861	ENSDART00000021013	7	19	19	GAACAAAGCAGTGTAGGCGGAGCC	6	+	2371	3546
ENSDARG00000000861	ENSDART00000021013	7	19	19	CTCAACTGCCCCATGGAAGATGAG	6	+	2488	3546
ENSDARG00000000861	ENSDART00000021013	7	19	19	AACTGCCCCATGGAAGATGAGTAC	6	+	2491	3546
ENSDARG00000000861	ENSDART00000021013	7	19	19	AACAAAGCAGTGTAGGCGGAGCC	5	+	2372	3546
ENSDARG00000000861	ENSDART00000074212	7	1	1	TACAACCGCAGTCTGGAGGAGCT	5	+	109	5172
ENSDARG00000000861	ENSDART00000074212	7	1	1	CGCTACAACCGCAGTCTGGAGGA	5	+	106	5172
ENSDARG00000000861	ENSDART00000074212	7	1	1	ACAACCGCAGTCTGGAGGAGCTGCT	7	+	110	5172
ENSDARG00000000861	ENSDART00000074212	7	3	3	AAATTCTGCCAGTCTTTGGAGAT	5	+	313	5172
ENSDARG00000000861	ENSDART00000074212	7	7	7	TGCCCAATCTTCGTGAGCTGTGGTT	7	+	596	5172
ENSDARG00000000861	ENSDART00000074212	7	8	8	TGCGGCAGCTGGTTTGCTTGGAC	5	+	665	5172
ENSDARG00000000861	ENSDART00000074212	7	10	10	GCCTGCAGAGCTGGGCGGATGTG	5	+	990	5172
ENSDARG00000000861	ENSDART00000074212	7	10	10	CTCTTCCGCGCTCACTTGGGAAGCT	7	+	917	5172
ENSDARG00000000861	ENSDART00000074212	7	12	12	CTCCAAACATGAAGAGGAAGATGAT	7	+	1368	5172
ENSDARG00000000861	ENSDART00000074212	7	12	12	GACTCCAAACATGAAGAGGAAGAT	6	+	1366	5172
ENSDARG00000000861	ENSDART00000074212	7	12	12	GACGACTCCAAACATGAAGAGGAA	6	+	1363	5172
ENSDARG00000000861	ENSDART00000074212	7	12	12	GACTGCGGCAGACAAGAGGGTGAG	6	+	1395	5172
ENSDARG00000000861	ENSDART00000074212	7	12	12	TGCGGCAGACAAGAGGGTGAGCG	5	+	1398	5172
ENSDARG00000000861	ENSDART00000074212	7	13	13	ATCCCCAGATGCTGAGGTGAGTGC	6	+	1524	5172
ENSDARG00000000861	ENSDART00000074212	7	15	15	TCCAGCACAGACTAGATGCAGCA	5	+	2057	5172
ENSDARG00000000861	ENSDART00000074212	7	15	15	CCCATCATCCGTGGTGGTGATGAG	6	+	1741	5172
ENSDARG00000000861	ENSDART00000074212	7	15	15	GCCCAAACCAGAGACAGTCGCCGCC	7	+	1905	5172
ENSDARG00000000861	ENSDART00000074212	7	15	15	ACAGCCTACTGTGCACTTTGCTGAA	7	+	1713	5172
ENSDARG00000000861	ENSDART00000074212	7	15	15	CCCAAACCAGAGACAGTCGCCGCC	6	+	1906	5172
ENSDARG00000000861	ENSDART00000074212	7	17	17	TTAGGCATCAGCATAGCAGGAGGG	6	+	2230	5172
ENSDARG00000000861	ENSDART00000074212	7	17	17	TCCCTATAAAGGTGACGATGAGGTA	7	+	2265	5172
ENSDARG00000000861	ENSDART00000074212	7	19	19	ATCACCACCACACCGTTGCGGCC	5	+	2485	5172
ENSDARG00000000861	ENSDART00000074212	7	19	19	GCATCATACAGCTGTTGAAGCTTTG	7	+	2394	5172
ENSDARG00000000861	ENSDART00000074212	7	19	19	GGCTTCAGCATTGCTGGTGGGAA	5	+	2641	5172
ENSDARG00000000861	ENSDART00000074212	7	19	19	TTAGGCTTCAGCATTGCTGGTGGG	6	+	2638	5172
ENSDARG00000000861	ENSDART00000074212	7	20	20	GACAACATCCTGCAAGTGGGAGAC	6	+	2740	5172
ENSDARG00000000861	ENSDART00000074212	7	21	21	AACTGCCCCATGGAAGATGAGTAC	6	+	2989	5172
ENSDARG00000000861	ENSDART00000074212	7	21	21	CTCAACTGCCCCATGGAAGATGAG	6	+	2986	5172
ENSDARG00000000861	ENSDART00000074212	7	21	21	AACAAAGCAGTGTAGGCGGAGCC	5	+	2870	5172
ENSDARG00000000861	ENSDART00000074212	7	21	21	GAACAAAGCAGTGTAGGCGGAGCC	6	+	2869	5172
ENSDARG00000000861	ENSDART00000074212	7	33	33	GACCCCTTCGCCTCTGGGTAGGC	5	+	4170	5172
ENSDARG00000000861	ENSDART00000074212	7	33	33	AACCTCGCATCTCACTGGTGGGAG	6	+	4274	5172
ENSDARG00000000861	ENSDART00000074212	7	33	33	GACCCCTTCGCCTCTGGGTAGGCA	6	+	4170	5172
ENSDARG00000000861	ENSDART00000074212	7	34	34	TTCCCCGACTTCACGGCAGTGTGC	6	+	4479	5172
ENSDARG00000000861	ENSDART00000074212	7	34	34	ACACCACCCAGCCACTGCGGAAGCT	7	+	4525	5172
ENSDARG00000000861	ENSDART00000074212	7	34	34	TTCCTCAGCAAAGCGAATTGAAC	5	+	4323	5172
ENSDARG00000000861	ENSDART00000074212	7	34	34	CACCACCCAGCCACTGCGGAAGCT	6	+	4526	5172
ENSDARG00000000861	ENSDART00000074212	7	35	35	ACCCAATTCTATGACCGGGTGAGTA	7	+	4626	5172
ENSDARG00000000861	ENSDART00000074212	7	40	40	GTAAACTACGCCAGGGCCGCCGCA	6	+	5135	5172
ENSDARG00000000861	ENSDART00000099151	7	2	2	AAATTCTGCCAGTCTTTGGAGAT	5	+	157	1434
ENSDARG00000000861	ENSDART00000099151	7	6	6	TGCCCAATCTTCGTGAGCTGTGGTT	7	+	440	1434
ENSDARG00000000861	ENSDART00000099151	7	7	7	TGCGGCAGCTGGTTTGCTTGGAC	5	+	509	1434
ENSDARG00000000861	ENSDART00000099151	7	9	9	CTCTTCCGCGCTCACTTGGGAAGCT	7	+	761	1434
ENSDARG00000000861	ENSDART00000099151	7	9	9	GCCTGCAGAGCTGGGCGGATGTG	5	+	834	1434
ENSDARG00000000861	ENSDART00000099151	7	11	11	CAAGCCAGAATGCATTGACTGAGTG	7	+	1145	1434
ENSDARG00000000861	ENSDART00000099151	7	12	12	TGCGGCAGACAAGAGGGTGAGCG	5	+	1278	1434
ENSDARG00000000861	ENSDART00000099151	7	12	12	GACTGCGGCAGACAAGAGGGTGAG	6	+	1275	1434
ENSDARG00000000861	ENSDART00000099151	7	12	12	GACTCCAAACATGAAGAGGAAGAT	6	+	1246	1434
ENSDARG00000000861	ENSDART00000099151	7	12	12	GACGACTCCAAACATGAAGAGGAA	6	+	1243	1434
ENSDARG00000000861	ENSDART00000099151	7	12	12	CTCCAAACATGAAGAGGAAGATGAT	7	+	1248	1434
ENSDARG00000000861	ENSDART00000099151	7	13	13	ATCCCCAGATGCTGAGGTGAGTGC	6	+	1395	1434
ENSDARG00000000861	ENSDART00000099152	7	2	2	AAATTCTGCCAGTCTTTGGAGAT	5	+	157	1431
ENSDARG00000000861	ENSDART00000099152	7	6	6	TGCCCAATCTTCGTGAGCTGTGGTT	7	+	440	1431
ENSDARG00000000861	ENSDART00000099152	7	7	7	TGCGGCAGCTGGTTTGCTTGGAC	5	+	509	1431
ENSDARG00000000861	ENSDART00000099152	7	9	9	CTCTTCCGCGCTCACTTGGGAAGCT	7	+	761	1431
ENSDARG00000000861	ENSDART00000099152	7	9	9	GCCTGCAGAGCTGGGCGGATGTG	5	+	834	1431
ENSDARG00000000861	ENSDART00000099152	7	13	13	TGCGGCAGACAAGAGGGTGAGCG	5	+	1281	1431
ENSDARG00000000861	ENSDART00000099152	7	13	13	GACTCCAAACATGAAGAGGAAGAT	6	+	1249	1431
ENSDARG00000000861	ENSDART00000099152	7	13	13	GACTGCGGCAGACAAGAGGGTGAG	6	+	1278	1431
ENSDARG00000000861	ENSDART00000099152	7	13	13	GACGACTCCAAACATGAAGAGGAA	6	+	1246	1431
ENSDARG00000000861	ENSDART00000099152	7	13	13	CTCCAAACATGAAGAGGAAGATGAT	7	+	1251	1431
ENSDARG00000001210	ENSDART00000001376	7	2	2	TTCTCAAACTCTGGAGGAGATGGT	6	+	250	672
ENSDARG00000001210	ENSDART00000001376	7	2	2	TTCCCACTCAGAACTCGTGTTTGTG	7	+	146	672
ENSDARG00000001210	ENSDART00000001376	7	3	3	AGAGACTCCAGCATGAAGGTAAC	5	+	382	672
ENSDARG00000001210	ENSDART00000001376	7	5	5	CGCTGCGACCGCAAGTGGCTGTA	5	+	607	672
ENSDARG00000001210	ENSDART00000001376	7	5	5	CCCTCCAGACAGTCGCTGTCTCT	5	+	448	672
ENSDARG00000001234	ENSDART00000001403	7	10	10	GAACCCCCACACAGAGCTGAGGAA	6	-	758	1221
ENSDARG00000001234	ENSDART00000001403	7	10	10	CCCCCACACAGAGCTGAGGAAGCT	6	-	755	1221
ENSDARG00000001234	ENSDART00000001403	7	10	10	CCCCACACAGAGCTGAGGAAGCT	5	-	755	1221
ENSDARG00000001234	ENSDART00000001403	7	10	10	ACCCCCACACAGAGCTGAGGAAGCT	7	-	755	1221
ENSDARG00000001234	ENSDART00000001403	7	10	10	AACCCCCACACAGAGCTGAGGAA	5	-	758	1221
ENSDARG00000001234	ENSDART00000001403	7	12	12	AAAGTCAAACTCCAGTTGGGATGCT	7	-	978	1221
ENSDARG00000001234	ENSDART00000001403	7	12	12	GTCAAACTCCAGTTGGGATGCTAAC	7	-	975	1221
ENSDARG00000001234	ENSDART00000001403	7	13	13	TACCTCACAGTTGTGCAGACTGC	5	-	1070	1221
ENSDARG00000001234	ENSDART00000001403	7	13	13	CTAAAACACTTTCTTCTAAGCAAAC	7	-	1018	1221
ENSDARG00000001234	ENSDART00000001403	7	14	14	ACACTCGGCTCTTGTCTGTGATTTC	7	-	1099	1221
ENSDARG00000001234	ENSDART00000009367	7	1	1	TGCCGCTCCCGATACGTTGAATAA	6	-	59	2622
ENSDARG00000001234	ENSDART00000009367	7	18	18	GTTGTCGCAGAGGCAGGTGGAGGGC	7	-	1208	2622
ENSDARG00000001234	ENSDART00000009367	7	18	18	GTTGTCGCAGAGGCAGGTGGAGGG	6	-	1209	2622
ENSDARG00000001234	ENSDART00000009367	7	19	19	GTCCTCTGCTGTTCCTCTGTGTTT	6	-	1437	2622
ENSDARG00000001234	ENSDART00000009367	7	27	27	GAACCCCCACACAGAGCTGAGGAA	6	-	2159	2622
ENSDARG00000001234	ENSDART00000009367	7	27	27	CCCCCACACAGAGCTGAGGAAGCT	6	-	2156	2622
ENSDARG00000001234	ENSDART00000009367	7	27	27	AACCCCCACACAGAGCTGAGGAA	5	-	2159	2622
ENSDARG00000001234	ENSDART00000009367	7	27	27	CCCCACACAGAGCTGAGGAAGCT	5	-	2156	2622
ENSDARG00000001234	ENSDART00000009367	7	27	27	ACCCCCACACAGAGCTGAGGAAGCT	7	-	2156	2622
ENSDARG00000001234	ENSDART00000009367	7	29	29	AAAGTCAAACTCCAGTTGGGATGCT	7	-	2379	2622
ENSDARG00000001234	ENSDART00000009367	7	29	29	GTCAAACTCCAGTTGGGATGCTAAC	7	-	2376	2622
ENSDARG00000001234	ENSDART00000009367	7	30	30	CTAAAACACTTTCTTCTAAGCAAAC	7	-	2419	2622
ENSDARG00000001234	ENSDART00000009367	7	30	30	TACCTCACAGTTGTGCAGACTGC	5	-	2471	2622
ENSDARG00000001234	ENSDART00000009367	7	31	31	ACACTCGGCTCTTGTCTGTGATTTC	7	-	2500	2622
ENSDARG00000001234	ENSDART00000042302	7	1	1	TGCCGCTCCCGATACGTTGAATAA	6	-	59	2025
ENSDARG00000001234	ENSDART00000042302	7	22	22	GAACCCCCACACAGAGCTGAGGAA	6	-	1562	2025
ENSDARG00000001234	ENSDART00000042302	7	22	22	AACCCCCACACAGAGCTGAGGAA	5	-	1562	2025
ENSDARG00000001234	ENSDART00000042302	7	24	24	AAAGTCAAACTCCAGTTGGGATGCT	7	-	1782	2025
ENSDARG00000001234	ENSDART00000042302	7	24	24	GTCAAACTCCAGTTGGGATGCTAAC	7	-	1779	2025
ENSDARG00000001234	ENSDART00000042302	7	25	25	TACCTCACAGTTGTGCAGACTGC	5	-	1874	2025
ENSDARG00000001234	ENSDART00000042302	7	25	25	CTAAAACACTTTCTTCTAAGCAAAC	7	-	1822	2025
ENSDARG00000001234	ENSDART00000042302	7	26	26	ACACTCGGCTCTTGTCTGTGATTTC	7	-	1903	2025
ENSDARG00000001234	ENSDART00000043952	7	1	1	TGCCGCTCCCGATACGTTGAATAA	6	-	59	2433
ENSDARG00000001234	ENSDART00000043952	7	15	15	GTTGTCGCAGAGGCAGGTGGAGGGC	7	-	1088	2433
ENSDARG00000001234	ENSDART00000043952	7	15	15	GTTGTCGCAGAGGCAGGTGGAGGG	6	-	1089	2433
ENSDARG00000001234	ENSDART00000043952	7	16	16	GTCCTCTGCTGTTCCTCTGTGTTT	6	-	1290	2433
ENSDARG00000001234	ENSDART00000043952	7	23	23	GAACCCCCACACAGAGCTGAGGAA	6	-	1970	2433
ENSDARG00000001234	ENSDART00000043952	7	23	23	AACCCCCACACAGAGCTGAGGAA	5	-	1970	2433
ENSDARG00000001234	ENSDART00000043952	7	23	23	CCCCCACACAGAGCTGAGGAAGCT	6	-	1967	2433
ENSDARG00000001234	ENSDART00000043952	7	23	23	CCCCACACAGAGCTGAGGAAGCT	5	-	1967	2433
ENSDARG00000001234	ENSDART00000043952	7	23	23	ACCCCCACACAGAGCTGAGGAAGCT	7	-	1967	2433
ENSDARG00000001234	ENSDART00000043952	7	25	25	AAAGTCAAACTCCAGTTGGGATGCT	7	-	2190	2433
ENSDARG00000001234	ENSDART00000043952	7	25	25	GTCAAACTCCAGTTGGGATGCTAAC	7	-	2187	2433
ENSDARG00000001234	ENSDART00000043952	7	26	26	CTAAAACACTTTCTTCTAAGCAAAC	7	-	2230	2433
ENSDARG00000001234	ENSDART00000043952	7	26	26	TACCTCACAGTTGTGCAGACTGC	5	-	2282	2433
ENSDARG00000001234	ENSDART00000043952	7	27	27	ACACTCGGCTCTTGTCTGTGATTTC	7	-	2311	2433
ENSDARG00000001234	ENSDART00000047961	7	1	1	TGCCGCTCCCGATACGTTGAATAA	6	-	59	1896
ENSDARG00000001234	ENSDART00000047961	7	19	19	GAACCCCCACACAGAGCTGAGGAA	6	-	1433	1896
ENSDARG00000001234	ENSDART00000047961	7	19	19	AACCCCCACACAGAGCTGAGGAA	5	-	1433	1896
ENSDARG00000001234	ENSDART00000047961	7	21	21	AAAGTCAAACTCCAGTTGGGATGCT	7	-	1653	1896
ENSDARG00000001234	ENSDART00000047961	7	21	21	GTCAAACTCCAGTTGGGATGCTAAC	7	-	1650	1896
ENSDARG00000001234	ENSDART00000047961	7	22	22	TACCTCACAGTTGTGCAGACTGC	5	-	1745	1896
ENSDARG00000001234	ENSDART00000047961	7	22	22	CTAAAACACTTTCTTCTAAGCAAAC	7	-	1693	1896
ENSDARG00000001234	ENSDART00000047961	7	23	23	ACACTCGGCTCTTGTCTGTGATTTC	7	-	1774	1896
ENSDARG00000001234	ENSDART00000101667	7	1	1	TGCCGCTCCCGATACGTTGAATAA	6	-	59	2025
ENSDARG00000001234	ENSDART00000101667	7	22	22	AACCCCCACACAGAGCTGAGGAA	5	-	1562	2025
ENSDARG00000001234	ENSDART00000101667	7	22	22	GAACCCCCACACAGAGCTGAGGAA	6	-	1562	2025
ENSDARG00000001234	ENSDART00000101667	7	24	24	AAAGTCAAACTCCAGTTGGGATGCT	7	-	1782	2025
ENSDARG00000001234	ENSDART00000101667	7	24	24	GTCAAACTCCAGTTGGGATGCTAAC	7	-	1779	2025
ENSDARG00000001234	ENSDART00000101667	7	25	25	TACCTCACAGTTGTGCAGACTGC	5	-	1874	2025
ENSDARG00000001234	ENSDART00000101667	7	25	25	CTAAAACACTTTCTTCTAAGCAAAC	7	-	1822	2025
ENSDARG00000001234	ENSDART00000101667	7	26	26	ACACTCGGCTCTTGTCTGTGATTTC	7	-	1903	2025
ENSDARG00000001234	ENSDART00000101677	7	2	2	TGCCGCTCCCGATACGTTGAATAA	6	-	74	2610
ENSDARG00000001234	ENSDART00000101677	7	18	18	GTTGTCGCAGAGGCAGGTGGAGGGC	7	-	1112	2610
ENSDARG00000001234	ENSDART00000101677	7	18	18	GTTGTCGCAGAGGCAGGTGGAGGG	6	-	1113	2610
ENSDARG00000001234	ENSDART00000101677	7	19	19	GTCCTCTGCTGTTCCTCTGTGTTT	6	-	1326	2610
ENSDARG00000001234	ENSDART00000101677	7	28	28	GAACCCCCACACAGAGCTGAGGAA	6	-	2135	2610
ENSDARG00000001234	ENSDART00000101677	7	28	28	CCCCCACACAGAGCTGAGGAAGCT	6	-	2132	2610
ENSDARG00000001234	ENSDART00000101677	7	28	28	AACCCCCACACAGAGCTGAGGAA	5	-	2135	2610
ENSDARG00000001234	ENSDART00000101677	7	28	28	CCCCACACAGAGCTGAGGAAGCT	5	-	2132	2610
ENSDARG00000001234	ENSDART00000101677	7	28	28	ACCCCCACACAGAGCTGAGGAAGCT	7	-	2132	2610
ENSDARG00000001234	ENSDART00000101677	7	30	30	GTCAAACTCCAGTTGGGATGCTAAC	7	-	2364	2610
ENSDARG00000001234	ENSDART00000101677	7	30	30	AAAGTCAAACTCCAGTTGGGATGCT	7	-	2367	2610
ENSDARG00000001234	ENSDART00000101677	7	31	31	TACCTCACAGTTGTGCAGACTGC	5	-	2459	2610
ENSDARG00000001234	ENSDART00000101677	7	31	31	CTAAAACACTTTCTTCTAAGCAAAC	7	-	2407	2610
ENSDARG00000001234	ENSDART00000101677	7	32	32	ACACTCGGCTCTTGTCTGTGATTTC	7	-	2488	2610
ENSDARG00000001241	ENSDART00000038487	7	4	2	ATCGCCCACCAGCAGCAGCAGCT	5	+	142	1557
ENSDARG00000001241	ENSDART00000038487	7	4	2	ACCATCGCCCACCAGCAGCAGCA	5	+	139	1557
ENSDARG00000001241	ENSDART00000038487	7	9	7	AACACCTACAACTCCCGGAGGTTTG	7	+	819	1557
ENSDARG00000001241	ENSDART00000038487	7	9	7	TTACTCCACCCATGCCTCTGCTAAC	7	+	797	1557
ENSDARG00000001241	ENSDART00000038487	7	9	7	TGCTGCAGCTGTGGCCGCTGCTGCT	7	+	849	1557
ENSDARG00000001241	ENSDART00000038487	7	9	7	TACTCCACCCATGCCTCTGCTAAC	6	+	798	1557
ENSDARG00000001241	ENSDART00000038487	7	9	7	GTTTGCCCCCTGCTGCAGCTGTG	5	+	839	1557
ENSDARG00000001241	ENSDART00000038487	7	9	7	GCCTCAGTCATCGCTGGATGCTGTC	7	+	717	1557
ENSDARG00000001241	ENSDART00000038487	7	9	7	GCCCCCTGCTGCAGCTGTGGCCGCT	7	+	843	1557
ENSDARG00000001241	ENSDART00000038487	7	9	7	ACCTACAACTCCCGGAGGTTTGC	5	+	822	1557
ENSDARG00000001241	ENSDART00000038487	7	9	7	CCCTGCTGCAGCTGTGGCCGCTGCT	7	+	846	1557
ENSDARG00000001241	ENSDART00000038487	7	9	7	AAAAGCCTCAGTCATCGCTGGATGC	7	+	713	1557
ENSDARG00000001241	ENSDART00000038487	7	10	8	TTCTCAGTCAGCAAATGGGACTTC	6	+	947	1557
ENSDARG00000001241	ENSDART00000038487	7	12	10	GCAGTCAACGGTTATGGTGTTGCG	6	+	1266	1557
ENSDARG00000001241	ENSDART00000038487	7	12	10	CTCAACAACCGCTGGTTTGCAGGT	6	+	1483	1557
ENSDARG00000001241	ENSDART00000038487	7	12	10	CTCTCAACAACCGCTGGTTTGCA	5	+	1481	1557
ENSDARG00000001241	ENSDART00000052274	7	2	2	ACCATCGCCCACCAGCAGCAGCA	5	+	139	1515
ENSDARG00000001241	ENSDART00000052274	7	2	2	ATCGCCCACCAGCAGCAGCAGCT	5	+	142	1515
ENSDARG00000001241	ENSDART00000052274	7	6	6	GCCTCAGTCATCGCTGGATGCTGTC	7	+	666	1515
ENSDARG00000001241	ENSDART00000052274	7	6	6	GTTTGCCCCCTGCTGCAGCTGTG	5	+	788	1515
ENSDARG00000001241	ENSDART00000052274	7	6	6	TACTCCACCCATGCCTCTGCTAAC	6	+	747	1515
ENSDARG00000001241	ENSDART00000052274	7	6	6	TGCTGCAGCTGTGGCCGCTGCTGCT	7	+	798	1515
ENSDARG00000001241	ENSDART00000052274	7	6	6	TTACTCCACCCATGCCTCTGCTAAC	7	+	746	1515
ENSDARG00000001241	ENSDART00000052274	7	6	6	GCCCCCTGCTGCAGCTGTGGCCGCT	7	+	792	1515
ENSDARG00000001241	ENSDART00000052274	7	6	6	AAAAGCCTCAGTCATCGCTGGATGC	7	+	662	1515
ENSDARG00000001241	ENSDART00000052274	7	6	6	AACACCTACAACTCCCGGAGGTTTG	7	+	768	1515
ENSDARG00000001241	ENSDART00000052274	7	6	6	CCCTGCTGCAGCTGTGGCCGCTGCT	7	+	795	1515
ENSDARG00000001241	ENSDART00000052274	7	6	6	ACCTACAACTCCCGGAGGTTTGC	5	+	771	1515
ENSDARG00000001241	ENSDART00000052274	7	7	7	TTCTCAGTCAGCAAATGGGACTTC	6	+	896	1515
ENSDARG00000001241	ENSDART00000052274	7	9	9	CTCAACAACCGCTGGTTTGCAGGT	6	+	1441	1515
ENSDARG00000001241	ENSDART00000052274	7	9	9	GCAGTCAACGGTTATGGTGTTGCG	6	+	1224	1515
ENSDARG00000001241	ENSDART00000052274	7	9	9	CTCTCAACAACCGCTGGTTTGCA	5	+	1439	1515
ENSDARG00000001285	ENSDART00000001466	7	2	1	AACTGCCGCAACACGCTGCAGCT	5	-	112	1668
ENSDARG00000001285	ENSDART00000001466	7	2	1	ACCCACAAACACCTTGGTTGAGTG	6	-	250	1668
ENSDARG00000001285	ENSDART00000001466	7	2	1	AGCGCCCTCTCCCTGCAGGTGTA	5	-	143	1668
ENSDARG00000001285	ENSDART00000001466	7	3	2	TACCGCAGCTTACACATGGGATTTT	7	-	496	1668
ENSDARG00000001285	ENSDART00000001466	7	3	2	GGCAGCAGCAGCAGCGGCAGCTGCT	7	-	597	1668
ENSDARG00000001285	ENSDART00000001466	7	3	2	GCCGGCAGCAGCAGCAGCGGCAGCT	7	-	600	1668
ENSDARG00000001285	ENSDART00000001466	7	3	2	AGCAGCAGCTGCTGCTGCCGCCGCG	7	-	927	1668
ENSDARG00000001285	ENSDART00000001466	7	3	2	AGCAGCAGCAGCGGCAGCTGCTAAC	7	-	594	1668
ENSDARG00000001285	ENSDART00000001466	7	3	2	TGCAGCAGCAGCTGCTGCTGCCGCC	7	-	930	1668
ENSDARG00000001285	ENSDART00000001466	7	4	3	AGAGGCGCAGATCTTCTTAGAGGAC	7	-	1226	1668
ENSDARG00000001285	ENSDART00000001466	7	4	3	AGAGCCCCATAAGCTGGGGTTGC	5	-	1084	1668
ENSDARG00000001285	ENSDART00000001466	7	4	3	TGCCTCAAAGATAGCTGCTGGGTC	6	-	1117	1668
ENSDARG00000001285	ENSDART00000001466	7	4	3	GTCATCCTCCTGTGCGGCGGCTTC	6	-	1333	1668
ENSDARG00000001285	ENSDART00000001466	7	4	3	GGCTTCTTCACGGCCCGCTGGTGTA	7	-	1314	1668
ENSDARG00000001285	ENSDART00000001466	7	4	3	GCCCCCAGAGCCCCATAAGCTGGG	6	-	1089	1668
ENSDARG00000001285	ENSDART00000001466	7	4	3	TGCTGCCTCAAAGATAGCTGCTGGG	7	-	1119	1668
ENSDARG00000001285	ENSDART00000001466	7	4	3	GTCATCCTCCTGTGCGGCGGCTTCT	7	-	1332	1668
ENSDARG00000001285	ENSDART00000001466	7	4	3	AGAGCCCCATAAGCTGGGGTTGCA	6	-	1083	1668
ENSDARG00000001285	ENSDART00000001466	7	5	4	TGCGACGGCGGAATCGGCGGTGGC	6	-	1593	1668
ENSDARG00000001285	ENSDART00000001466	7	5	4	TGCGACGGCGGAATCGGCGGTGGCT	7	-	1592	1668
ENSDARG00000001285	ENSDART00000001466	7	5	4	TACTCCGCATAGTATCTGGGGGA	5	-	1360	1668
ENSDARG00000001285	ENSDART00000001466	7	5	4	GGCAGCGGCAGGCACGGGGGCGGC	6	-	1537	1668
ENSDARG00000001285	ENSDART00000001466	7	5	4	GTACTCCGCATAGTATCTGGGGGA	6	-	1360	1668
ENSDARG00000001285	ENSDART00000001466	7	5	4	GGCTCATACACGCGGGGTGTTGCC	6	-	1572	1668
ENSDARG00000001285	ENSDART00000001466	7	5	4	GGCAGCGGCAGGCACGGGGGCGGCG	7	-	1536	1668
ENSDARG00000001285	ENSDART00000102746	7	1	1	AGCGCCCTCTCCCTGCAGGTGTA	5	-	143	1473
ENSDARG00000001285	ENSDART00000102746	7	1	1	ACCCACAAACACCTTGGTTGAGTG	6	-	250	1473
ENSDARG00000001285	ENSDART00000102746	7	1	1	AACTGCCGCAACACGCTGCAGCT	5	-	112	1473
ENSDARG00000001285	ENSDART00000102746	7	3	3	TACCGCAGCTTACACATGGGATTTT	7	-	517	1473
ENSDARG00000001285	ENSDART00000102746	7	3	3	GGCAGCAGCAGCAGCGGCAGCTGCT	7	-	618	1473
ENSDARG00000001285	ENSDART00000102746	7	3	3	AGCAGCAGCAGCGGCAGCTGCTAAC	7	-	615	1473
ENSDARG00000001285	ENSDART00000102746	7	3	3	GCCGGCAGCAGCAGCAGCGGCAGCT	7	-	621	1473
ENSDARG00000001285	ENSDART00000102746	7	5	5	GGCTTCTTCACGGCCCGCTGGTGTA	7	-	1119	1473
ENSDARG00000001285	ENSDART00000102746	7	5	5	TGCCTCAAAGATAGCTGCTGGGTC	6	-	922	1473
ENSDARG00000001285	ENSDART00000102746	7	5	5	GTCATCCTCCTGTGCGGCGGCTTC	6	-	1138	1473
ENSDARG00000001285	ENSDART00000102746	7	5	5	GTCATCCTCCTGTGCGGCGGCTTCT	7	-	1137	1473
ENSDARG00000001285	ENSDART00000102746	7	5	5	AGAGCCCCATAAGCTGGGGTTGC	5	-	889	1473
ENSDARG00000001285	ENSDART00000102746	7	5	5	TGCTGCCTCAAAGATAGCTGCTGGG	7	-	924	1473
ENSDARG00000001285	ENSDART00000102746	7	5	5	GCCCCCAGAGCCCCATAAGCTGGG	6	-	894	1473
ENSDARG00000001285	ENSDART00000102746	7	5	5	AGAGGCGCAGATCTTCTTAGAGGAC	7	-	1031	1473
ENSDARG00000001285	ENSDART00000102746	7	5	5	AGAGCCCCATAAGCTGGGGTTGCA	6	-	888	1473
ENSDARG00000001285	ENSDART00000102746	7	6	6	TGCGACGGCGGAATCGGCGGTGGC	6	-	1398	1473
ENSDARG00000001285	ENSDART00000102746	7	6	6	TGCGACGGCGGAATCGGCGGTGGCT	7	-	1397	1473
ENSDARG00000001285	ENSDART00000102746	7	6	6	TACTCCGCATAGTATCTGGGGGA	5	-	1165	1473
ENSDARG00000001285	ENSDART00000102746	7	6	6	GTACTCCGCATAGTATCTGGGGGA	6	-	1165	1473
ENSDARG00000001285	ENSDART00000102746	7	6	6	GGCTCATACACGCGGGGTGTTGCC	6	-	1377	1473
ENSDARG00000001285	ENSDART00000102746	7	6	6	GGCAGCGGCAGGCACGGGGGCGGCG	7	-	1341	1473
ENSDARG00000001285	ENSDART00000102746	7	6	6	GGCAGCGGCAGGCACGGGGGCGGC	6	-	1342	1473
ENSDARG00000001431	ENSDART00000001649	7	1	1	GTAGACATCATGTAGGTGTTGTT	5	-	43	2694
ENSDARG00000001431	ENSDART00000001649	7	2	2	ACACCACGCCGTGAACGTCTGGGAG	7	-	141	2694
ENSDARG00000001431	ENSDART00000001649	7	2	2	CACCACGCCGTGAACGTCTGGGAG	6	-	141	2694
ENSDARG00000001431	ENSDART00000001649	7	2	2	AGCAGCAGCATGAGTTTGAGGCC	5	-	226	2694
ENSDARG00000001431	ENSDART00000001649	7	3	3	AAATCCAGAGCCTTGTTGACGTT	5	-	316	2694
ENSDARG00000001431	ENSDART00000001649	7	6	6	AGCAGCACCTTTCTGAGTTTGGA	5	-	622	2694
ENSDARG00000001431	ENSDART00000001649	7	7	7	CTCAGCCACCTCAAATGCAGTGTTC	7	-	657	2694
ENSDARG00000001431	ENSDART00000001649	7	7	7	TTCAGCGTCCAGCATTTTGGGGA	5	-	695	2694
ENSDARG00000001431	ENSDART00000001649	7	7	7	TTCAGCGTCCAGCATTTTGGGGAT	6	-	694	2694
ENSDARG00000001431	ENSDART00000001649	7	8	8	TTCAGCACCAGCGAAAGCATGGTAA	7	-	777	2694
ENSDARG00000001431	ENSDART00000001649	7	10	10	TTCTCCAGCCAGGGGATGGTGCG	5	-	916	2694
ENSDARG00000001431	ENSDART00000001649	7	10	10	TTCTCCTGCACGCGCGGAGGCTTG	6	-	1011	2694
ENSDARG00000001431	ENSDART00000001649	7	10	10	GAAATCCTCCAGCTTCTGCTGCA	5	-	968	2694
ENSDARG00000001431	ENSDART00000001649	7	10	10	TTCTCCTGCACGCGCGGAGGCTTGT	7	-	1010	2694
ENSDARG00000001431	ENSDART00000001649	7	10	10	TTCTGCTGCATGGCGCGCATGGTCT	7	-	953	2694
ENSDARG00000001431	ENSDART00000001649	7	14	14	GGCTCCGTCCATCCAGTTGTTGAA	6	-	1603	2694
ENSDARG00000001431	ENSDART00000001649	7	15	15	GACTCCGACCAGCTTGATGCCGTA	6	-	1786	2694
ENSDARG00000001431	ENSDART00000001649	7	15	15	AGCCTCCCATTTGTTGGTGATGTC	6	-	1837	2694
ENSDARG00000001431	ENSDART00000001649	7	15	15	CACAGCCTCCCATTTGTTGGTGAT	6	-	1840	2694
ENSDARG00000001431	ENSDART00000001649	7	15	15	ACAGCCTCCCATTTGTTGGTGAT	5	-	1840	2694
ENSDARG00000001431	ENSDART00000001649	7	16	16	GGCAACCTCCTCCTGCAGCATCT	5	-	1889	2694
ENSDARG00000001431	ENSDART00000001649	7	16	16	TGCAGCATCTGGTCTCTGAGGGG	5	-	1876	2694
ENSDARG00000001431	ENSDART00000001649	7	17	17	TCCTCCAGAGAGCCGGCGATGTC	5	-	2017	2694
ENSDARG00000001431	ENSDART00000001649	7	17	17	GTCTCCCTCCAGCTTGTCGATGTT	6	-	2092	2694
ENSDARG00000001431	ENSDART00000001649	7	17	17	CCCTCCAGCTTGTCGATGTTGGA	5	-	2089	2694
ENSDARG00000001431	ENSDART00000001649	7	17	17	AGCGCCTCCTGAATGAGCTGGTGGT	7	-	2114	2694
ENSDARG00000001431	ENSDART00000001649	7	18	18	GTTCTCCACCTCGTTGATGGTGCG	6	-	2218	2694
ENSDARG00000001431	ENSDART00000001649	7	18	18	CCCAGCCCACACGGATGTGCTGGA	6	-	2171	2694
ENSDARG00000001431	ENSDART00000001649	7	18	18	AGCCCACACGGATGTGCTGGAGGA	6	-	2168	2694
ENSDARG00000001431	ENSDART00000001649	7	18	18	TTCTCCACCTCGTTGATGGTGCG	5	-	2218	2694
ENSDARG00000001431	ENSDART00000001649	7	20	20	CACCACGCCGGTGTTGTTGGGGT	5	-	2426	2694
ENSDARG00000001431	ENSDART00000001649	7	20	20	CACCACGCCGGTGTTGTTGGGGTC	6	-	2425	2694
ENSDARG00000001431	ENSDART00000001649	7	21	21	AGCTCCTCCACGGTGATGTAGGG	5	-	2548	2694
ENSDARG00000001431	ENSDART00000102753	7	1	1	GTAGACATCATGTAGGTGTTGTT	5	-	43	2697
ENSDARG00000001431	ENSDART00000102753	7	2	2	CACCACGCCGTGAACGTCTGGGAG	6	-	141	2697
ENSDARG00000001431	ENSDART00000102753	7	2	2	AGCAGCAGCATGAGTTTGAGGCC	5	-	226	2697
ENSDARG00000001431	ENSDART00000102753	7	2	2	ACACCACGCCGTGAACGTCTGGGAG	7	-	141	2697
ENSDARG00000001431	ENSDART00000102753	7	3	3	AAATCCAGAGCCTTGTTGACGTT	5	-	316	2697
ENSDARG00000001431	ENSDART00000102753	7	6	6	AGCAGCACCTTTCTGAGTTTGGA	5	-	622	2697
ENSDARG00000001431	ENSDART00000102753	7	7	7	TTCAGCGTCCAGCATTTTGGGGAT	6	-	694	2697
ENSDARG00000001431	ENSDART00000102753	7	7	7	CTCAGCCACCTCAAATGCAGTGTTC	7	-	657	2697
ENSDARG00000001431	ENSDART00000102753	7	7	7	TTCAGCGTCCAGCATTTTGGGGA	5	-	695	2697
ENSDARG00000001431	ENSDART00000102753	7	8	8	TTCAGCACCAGCGAAAGCATGGTAA	7	-	777	2697
ENSDARG00000001431	ENSDART00000102753	7	10	10	TTCTCCTGCACGCGCGGAGGCTTGT	7	-	1010	2697
ENSDARG00000001431	ENSDART00000102753	7	10	10	TTCTCCTGCACGCGCGGAGGCTTG	6	-	1011	2697
ENSDARG00000001431	ENSDART00000102753	7	10	10	TTCTGCTGCATGGCGCGCATGGTCT	7	-	953	2697
ENSDARG00000001431	ENSDART00000102753	7	10	10	TTCTCCAGCCAGGGGATGGTGCG	5	-	916	2697
ENSDARG00000001431	ENSDART00000102753	7	10	10	GAAATCCTCCAGCTTCTGCTGCA	5	-	968	2697
ENSDARG00000001431	ENSDART00000102753	7	14	14	GGCTCCGTCCATCCAGTTGTTGAA	6	-	1603	2697
ENSDARG00000001431	ENSDART00000102753	7	15	15	AGCCTCCCATTTGTTGGTGATGTC	6	-	1837	2697
ENSDARG00000001431	ENSDART00000102753	7	15	15	CACAGCCTCCCATTTGTTGGTGAT	6	-	1840	2697
ENSDARG00000001431	ENSDART00000102753	7	15	15	ACAGCCTCCCATTTGTTGGTGAT	5	-	1840	2697
ENSDARG00000001431	ENSDART00000102753	7	15	15	GACTCCGACCAGCTTGATGCCGTA	6	-	1786	2697
ENSDARG00000001431	ENSDART00000102753	7	16	16	TGCAGCATCTGGTCTCTGAGGGG	5	-	1876	2697
ENSDARG00000001431	ENSDART00000102753	7	16	16	GGCAACCTCCTCCTGCAGCATCT	5	-	1889	2697
ENSDARG00000001431	ENSDART00000102753	7	17	17	AGCGCCTCCTGAATGAGCTGGTGGT	7	-	2114	2697
ENSDARG00000001431	ENSDART00000102753	7	17	17	TCCTCCAGAGAGCCGGCGATGTC	5	-	2017	2697
ENSDARG00000001431	ENSDART00000102753	7	17	17	CCCTCCAGCTTGTCGATGTTGGA	5	-	2089	2697
ENSDARG00000001431	ENSDART00000102753	7	17	17	GTCTCCCTCCAGCTTGTCGATGTT	6	-	2092	2697
ENSDARG00000001431	ENSDART00000102753	7	19	19	TTCTCCACCTCGTTGATGGTGCG	5	-	2221	2697
ENSDARG00000001431	ENSDART00000102753	7	19	19	CCCAGCCCACACGGATGTGCTGGA	6	-	2174	2697
ENSDARG00000001431	ENSDART00000102753	7	19	19	AGCCCACACGGATGTGCTGGAGGA	6	-	2171	2697
ENSDARG00000001431	ENSDART00000102753	7	19	19	GTTCTCCACCTCGTTGATGGTGCG	6	-	2221	2697
ENSDARG00000001431	ENSDART00000102753	7	21	21	CACCACGCCGGTGTTGTTGGGGTC	6	-	2428	2697
ENSDARG00000001431	ENSDART00000102753	7	21	21	CACCACGCCGGTGTTGTTGGGGT	5	-	2429	2697
ENSDARG00000001431	ENSDART00000102753	7	22	22	AGCTCCTCCACGGTGATGTAGGG	5	-	2551	2697
ENSDARG00000001634	ENSDART00000009695	7	2	2	GCCTGCAGACCAGTCAGTGGTGTTG	7	+	84	2421
ENSDARG00000001634	ENSDART00000009695	7	2	2	CAACTATTCAGGCATTGTGCAGTG	6	+	141	2421
ENSDARG00000001634	ENSDART00000009695	7	2	2	AGACCAGTCAGTGGTGTTGGGCC	5	+	90	2421
ENSDARG00000001634	ENSDART00000009695	7	2	2	GTCTTCAACTATTCAGGCATTGTGC	7	+	136	2421
ENSDARG00000001634	ENSDART00000009695	7	4	4	GTTCCCTACAACATGAGCTGCGTGT	7	+	415	2421
ENSDARG00000001634	ENSDART00000009695	7	6	6	TGCCAACCCACCTATTATGGGTT	5	+	747	2421
ENSDARG00000001634	ENSDART00000009695	7	6	6	GCAGACCCACCAGTGGTGACGTT	5	+	664	2421
ENSDARG00000001634	ENSDART00000009695	7	11	11	ACCTACAACTGCACTGCATGGAAC	6	+	1429	2421
ENSDARG00000001634	ENSDART00000009695	7	12	12	TGCTTCTCCTGTGCTTATTGGCT	5	+	1547	2421
ENSDARG00000001634	ENSDART00000009695	7	13	13	AGAGCCACAGCCTGGAGGAAGAT	5	+	1661	2421
ENSDARG00000001634	ENSDART00000009695	7	13	13	CACAGCCACGCGCATGGTGAAGGC	6	+	1698	2421
ENSDARG00000001634	ENSDART00000009695	7	15	15	TTATCCCACGTTTCGGATGGGAT	5	+	2208	2421
ENSDARG00000001634	ENSDART00000009695	7	15	15	GACTTCCCCGCTGAATGCAGCCTGT	7	+	2134	2421
ENSDARG00000001634	ENSDART00000009695	7	15	15	GACCCCAGAAACTGGACTTGGGA	5	+	2322	2421
ENSDARG00000001634	ENSDART00000009695	7	15	15	CCCAGCCTCGCCCCATTAGAAGGA	6	+	2239	2421
ENSDARG00000001634	ENSDART00000009695	7	15	15	CCCACCGTCACACACAGAGGATGCA	7	+	2396	2421
ENSDARG00000001634	ENSDART00000009695	7	15	15	AGCCTCGCCCCATTAGAAGGAGGG	6	+	2242	2421
ENSDARG00000001634	ENSDART00000009695	7	15	15	ACCGTCACACACAGAGGATGCAGAC	7	+	2399	2421
ENSDARG00000001634	ENSDART00000100687	7	1	1	GTCTGCTGCTGCTTCTGAGTTTGGC	7	+	17	2421
ENSDARG00000001634	ENSDART00000100687	7	1	1	GAACCATGCAGGGTCTGCTGCTGCT	7	+	5	2421
ENSDARG00000001634	ENSDART00000100687	7	1	1	TGCTGCTGCTTCTGAGTTTGGCGTT	7	+	20	2421
ENSDARG00000001634	ENSDART00000100687	7	1	1	TGCTGCTTCTGAGTTTGGCGTTGAG	7	+	23	2421
ENSDARG00000001634	ENSDART00000100687	7	2	2	GCCTGCAGACCAGTCAGTGGTGTTG	7	+	84	2421
ENSDARG00000001634	ENSDART00000100687	7	2	2	GTCTTCAACTATTCAGGCATTGTGC	7	+	136	2421
ENSDARG00000001634	ENSDART00000100687	7	2	2	CAACTATTCAGGCATTGTGCAGTG	6	+	141	2421
ENSDARG00000001634	ENSDART00000100687	7	2	2	AGACCAGTCAGTGGTGTTGGGCC	5	+	90	2421
ENSDARG00000001634	ENSDART00000100687	7	4	4	GTTCCCTACAACATGAGCTGCGTGT	7	+	415	2421
ENSDARG00000001634	ENSDART00000100687	7	6	6	TGCCAACCCACCTATTATGGGTT	5	+	747	2421
ENSDARG00000001634	ENSDART00000100687	7	6	6	GCAGACCCACCAGTGGTGACGTT	5	+	664	2421
ENSDARG00000001634	ENSDART00000100687	7	11	11	ACCTACAACTGCACTGCATGGAAC	6	+	1429	2421
ENSDARG00000001634	ENSDART00000100687	7	12	12	TGCTTCTCCTGTGCTTATTGGCT	5	+	1547	2421
ENSDARG00000001634	ENSDART00000100687	7	13	13	CACAGCCACGCGCATGGTGAAGGC	6	+	1698	2421
ENSDARG00000001634	ENSDART00000100687	7	13	13	AGAGCCACAGCCTGGAGGAAGAT	5	+	1661	2421
ENSDARG00000001634	ENSDART00000100687	7	15	15	TTATCCCACGTTTCGGATGGGAT	5	+	2208	2421
ENSDARG00000001634	ENSDART00000100687	7	15	15	GACTTCCCCGCTGAATGCAGCCTGT	7	+	2134	2421
ENSDARG00000001634	ENSDART00000100687	7	15	15	ACCGTCACACACAGAGGATGCAGAC	7	+	2399	2421
ENSDARG00000001634	ENSDART00000100687	7	15	15	CCCACCGTCACACACAGAGGATGCA	7	+	2396	2421
ENSDARG00000001634	ENSDART00000100687	7	15	15	AGCCTCGCCCCATTAGAAGGAGGG	6	+	2242	2421
ENSDARG00000001634	ENSDART00000100687	7	15	15	CCCAGCCTCGCCCCATTAGAAGGA	6	+	2239	2421
ENSDARG00000001634	ENSDART00000100687	7	15	15	GACCCCAGAAACTGGACTTGGGA	5	+	2322	2421
ENSDARG00000001776	ENSDART00000012089	7	2	2	CTCCTCCACCGTGATGTGCTGGT	5	-	212	2052
ENSDARG00000001776	ENSDART00000012089	7	2	2	AGCTCCTCCACCGTGATGTGCTGGT	7	-	212	2052
ENSDARG00000001776	ENSDART00000012089	7	5	5	CTCTTCAGCGTGCTGCAGACTCT	5	-	623	2052
ENSDARG00000001776	ENSDART00000012089	7	5	5	GCAGCCGCCCACACCGATGATGAT	6	-	535	2052
ENSDARG00000001776	ENSDART00000012089	7	5	5	GCCGCCCACACCGATGATGATGGA	6	-	532	2052
ENSDARG00000001776	ENSDART00000012089	7	5	5	TTCATCATCTGCGAGATGTGGAT	5	-	592	2052
ENSDARG00000001776	ENSDART00000012089	7	5	5	TTCATCATCTGCGAGATGTGGATTT	7	-	590	2052
ENSDARG00000001776	ENSDART00000012089	7	5	5	ATCATCTGCGAGATGTGGATTTTAG	7	-	587	2052
ENSDARG00000001776	ENSDART00000012089	7	5	5	ATCATCTGCGAGATGTGGATTTT	5	-	589	2052
ENSDARG00000001776	ENSDART00000012089	7	5	5	AGCCGCCCACACCGATGATGATGGA	7	-	532	2052
ENSDARG00000001776	ENSDART00000012089	7	5	5	AGCAGCCGCCCACACCGATGATGAT	7	-	535	2052
ENSDARG00000001776	ENSDART00000012089	7	6	6	ATCTTCTGCTCCAGGTTCTGCTTCT	7	-	710	2052
ENSDARG00000001776	ENSDART00000012089	7	6	6	ACAAGCTCCTCCTCTGCGTATTT	5	-	820	2052
ENSDARG00000001776	ENSDART00000012089	7	6	6	CTCCTCCTCTGCGTATTTGAGTCT	6	-	814	2052
ENSDARG00000001776	ENSDART00000012089	7	6	6	AGCTCCTCCTCTGCGTATTTGAG	5	-	817	2052
ENSDARG00000001776	ENSDART00000012089	7	7	7	TTCTGCTTCTTGATGTTGTAGTA	5	-	952	2052
ENSDARG00000001776	ENSDART00000012089	7	7	7	TGCACCTCCACCTCATGTGTGAGCT	7	-	926	2052
ENSDARG00000001776	ENSDART00000012089	7	7	7	CACCTCCACCTCATGTGTGAGCT	5	-	926	2052
ENSDARG00000001776	ENSDART00000012089	7	7	7	AGCTGCAGCTCTGCGTTCTGCTTCT	7	-	965	2052
ENSDARG00000001776	ENSDART00000012089	7	9	9	GGCATCACCACCCAGCTGTGGTC	5	-	1240	2052
ENSDARG00000001776	ENSDART00000012089	7	9	9	CACTCCACCAGCAATCGGGTAGGGT	7	-	1278	2052
ENSDARG00000001776	ENSDART00000012089	7	10	10	GTCAGCAGAGAGAGTGGTGGGCT	5	-	1418	2052
ENSDARG00000001776	ENSDART00000012089	7	10	10	TTCCTCTCCCTCGGGTCTGTAGAC	6	-	1474	2052
ENSDARG00000001776	ENSDART00000012089	7	11	11	GTTATCGCAAGAGTCCTGGGGGGAG	7	-	1986	2052
ENSDARG00000001776	ENSDART00000012089	7	11	11	AAACTCCTCACGGGAGATTTTGCG	6	-	1645	2052
ENSDARG00000001776	ENSDART00000012089	7	11	11	GGCCACAACTCTGGTGCTAGGGT	5	-	1823	2052
ENSDARG00000001910	ENSDART00000019140	7	3	3	GTCTGCAGAAATGCTTAGCAGTG	5	+	227	1422
ENSDARG00000001910	ENSDART00000019140	7	3	3	AACCGCTGCCAGCACTGCCGTCTGC	7	+	208	1422
ENSDARG00000001910	ENSDART00000019140	7	4	4	AGAAGCACCGTCAGCAGCAGCAGGA	7	+	323	1422
ENSDARG00000001910	ENSDART00000019140	7	4	4	AGACTCTGCTATCGGGGGATTTT	5	+	510	1422
ENSDARG00000001910	ENSDART00000019140	7	4	4	AGACTCTGCTATCGGGGGATTTTAC	7	+	510	1422
ENSDARG00000001910	ENSDART00000019140	7	4	4	GCCCTCTCCAGACCAGTCGGGTCT	6	+	546	1422
ENSDARG00000001910	ENSDART00000019140	7	5	5	TCCTACAGAGCAACCTGGAGGCGTA	7	+	770	1422
ENSDARG00000001910	ENSDART00000019140	7	7	7	GTCTTCAAAGCATTGGGTGAGCA	5	+	1030	1422
ENSDARG00000001910	ENSDART00000019140	7	8	8	CTCTTCAGCTCAGTGAAGATGAG	5	+	1097	1422
ENSDARG00000001910	ENSDART00000019140	7	9	9	TGCAAAAGAACAAGAGGGATGAGGG	7	+	1232	1422
ENSDARG00000001910	ENSDART00000019140	7	10	10	GTTTCCCTCCGCTCTATAAGGAGTT	7	+	1367	1422
ENSDARG00000001910	ENSDART00000019140	7	10	10	TCCCTCCGCTCTATAAGGAGTTGTT	7	+	1370	1422
ENSDARG00000001910	ENSDART00000019140	7	10	10	GGCTCAGACTTTGAGCAGATTCT	5	+	1396	1422
ENSDARG00000001910	ENSDART00000019140	7	10	10	TTCTGCCTCAGGAGGCCTGATAG	5	+	1415	1422
ENSDARG00000001910	ENSDART00000099477	7	2	2	AACCGCTGCCAGCACTGCCGTCTGC	7	+	187	1398
ENSDARG00000001910	ENSDART00000099477	7	2	2	GTCTGCAGAAATGCTTAGCAGTG	5	+	206	1398
ENSDARG00000001910	ENSDART00000099477	7	3	3	GCCCTCTCCAGACCAGTCGGGTCT	6	+	525	1398
ENSDARG00000001910	ENSDART00000099477	7	3	3	AGACTCTGCTATCGGGGGATTTTAC	7	+	489	1398
ENSDARG00000001910	ENSDART00000099477	7	3	3	AGACTCTGCTATCGGGGGATTTT	5	+	489	1398
ENSDARG00000001910	ENSDART00000099477	7	3	3	AGAAGCACCGTCAGCAGCAGCAGGA	7	+	302	1398
ENSDARG00000001910	ENSDART00000099477	7	5	5	TCCTACAGAGCAACCTGGAGGCGTA	7	+	746	1398
ENSDARG00000001910	ENSDART00000099477	7	7	7	GTCTTCAAAGCATTGGGTGAGCA	5	+	1006	1398
ENSDARG00000001910	ENSDART00000099477	7	8	8	CTCTTCAGCTCAGTGAAGATGAG	5	+	1073	1398
ENSDARG00000001910	ENSDART00000099477	7	9	9	TGCAAAAGAACAAGAGGGATGAGGG	7	+	1208	1398
ENSDARG00000001910	ENSDART00000099477	7	10	10	TTCTGCCTCAGGAGGCCTGATAG	5	+	1391	1398
ENSDARG00000001910	ENSDART00000099477	7	10	10	TCCCTCCGCTCTATAAGGAGTTGTT	7	+	1346	1398
ENSDARG00000001910	ENSDART00000099477	7	10	10	GTTTCCCTCCGCTCTATAAGGAGTT	7	+	1343	1398
ENSDARG00000001910	ENSDART00000099477	7	10	10	GGCTCAGACTTTGAGCAGATTCT	5	+	1372	1398
ENSDARG00000001939	ENSDART00000025582	7	3	3	GCCTACAGCTTTTTGAAGAGGTG	5	+	593	978
ENSDARG00000001939	ENSDART00000025582	7	3	3	AGCAGCTGCCCTTGAAGAGGCCGTG	7	+	537	978
ENSDARG00000001939	ENSDART00000025582	7	3	3	AGAAGCAGCTGCCCTTGAAGAGGCC	7	+	534	978
ENSDARG00000001939	ENSDART00000025582	7	3	3	ACAGCCTACAGCTTTTTGAAGAG	5	+	590	978
ENSDARG00000001939	ENSDART00000025582	7	3	3	ACACTCATCTAAACAAGCTGACGCC	7	+	395	978
ENSDARG00000001939	ENSDART00000025582	7	7	7	CACAAAACAAGATATTTATAGGAA	6	+	962	978
ENSDARG00000001939	ENSDART00000025582	7	7	7	ACACAAAACAAGATATTTATAGGAA	7	+	961	978
ENSDARG00000001975	ENSDART00000025665	7	1	1	AAACCCTCCCTGCCAGTTGAAGAC	6	+	241	1242
ENSDARG00000001975	ENSDART00000025665	7	2	2	TGCTACAGCAAAGAAGTTGGATGC	6	+	306	1242
ENSDARG00000001975	ENSDART00000025665	7	3	3	TCCTCCAGATTTGTGGGGGCTTGT	6	+	489	1242
ENSDARG00000001975	ENSDART00000025665	7	3	3	TCCTCCAGATTTGTGGGGGCTTG	5	+	489	1242
ENSDARG00000001975	ENSDART00000025665	7	3	3	GAACAACGCTGGCTGGTGTGTAA	5	+	513	1242
ENSDARG00000001975	ENSDART00000025665	7	4	4	GGCTTCAAAGGCTGCTCTGAATCT	6	+	717	1242
ENSDARG00000001975	ENSDART00000025665	7	5	5	GTCATCGACACCATTGTGGAAGCG	6	+	979	1242
ENSDARG00000001999	ENSDART00000004120	7	2	2	TTATCCACCTGTACAGGTTTGGTAA	7	+	469	3672
ENSDARG00000001999	ENSDART00000004120	7	2	2	TTCACCCACAGATTATGATTTTGCC	7	+	159	3672
ENSDARG00000001999	ENSDART00000004120	7	2	2	TTATCCACCTGTACAGGTTTGGTA	6	+	469	3672
ENSDARG00000001999	ENSDART00000004120	7	2	2	AAACCATTCTGATTCATCTGTGGCT	7	+	444	3672
ENSDARG00000001999	ENSDART00000004120	7	2	2	GCCATCCCACGTGCTGGCAGAGGGG	7	+	330	3672
ENSDARG00000001999	ENSDART00000004120	7	3	3	TTACTCCACTACCACAGCATTTGGC	7	+	527	3672
ENSDARG00000001999	ENSDART00000004120	7	3	3	AGAGACAACATTTCTGCGGACGCC	6	+	740	3672
ENSDARG00000001999	ENSDART00000004120	7	3	3	CTCCACTACCACAGCATTTGGCTTT	7	+	530	3672
ENSDARG00000001999	ENSDART00000004120	7	9	9	AAACTATGCGGCCTGGACTTTGTA	6	+	1588	3672
ENSDARG00000001999	ENSDART00000004120	7	12	12	AGCAAACCATTCAGGGGGTGGTAC	6	+	1978	3672
ENSDARG00000001999	ENSDART00000004120	7	12	12	AGCAAACCATTCAGGGGGTGGTA	5	+	1978	3672
ENSDARG00000001999	ENSDART00000004120	7	12	12	AACAGCAAACCATTCAGGGGGTGGT	7	+	1975	3672
ENSDARG00000001999	ENSDART00000004120	7	13	13	TACTGCATCGCTGAGGACTTTGAT	6	+	2053	3672
ENSDARG00000001999	ENSDART00000004120	7	13	13	GACTACAAAGGGGGCGTGTGCATAG	7	+	2125	3672
ENSDARG00000001999	ENSDART00000004120	7	14	14	TTCAGCACAGAGCCAATGGTGAGTC	7	+	2270	3672
ENSDARG00000001999	ENSDART00000004120	7	16	16	TACCACATCCAGAGAAGAAGCATAA	7	+	2582	3672
ENSDARG00000001999	ENSDART00000004120	7	16	16	CTCTACCACATCCAGAGAAGAAGCA	7	+	2579	3672
ENSDARG00000001999	ENSDART00000004120	7	16	16	CTCGGCACCTTGTGCGGGAGGTGAG	7	+	2637	3672
ENSDARG00000001999	ENSDART00000004120	7	17	17	AAACAAGACCGGTGGTTGGCTCT	5	+	2729	3672
ENSDARG00000001999	ENSDART00000004120	7	17	17	CCCTCAAACAAGACCGGTGGTTGGC	7	+	2724	3672
ENSDARG00000001999	ENSDART00000004120	7	18	18	ATCCGCTGCCTGAGGAAGGTGAC	5	+	2848	3672
ENSDARG00000001999	ENSDART00000004120	7	18	18	AACATCCGCTGCCTGAGGAAGGT	5	+	2845	3672
ENSDARG00000001999	ENSDART00000004120	7	19	19	CCCAAAGCCCAGGAGAGCTGTGTGC	7	+	3103	3672
ENSDARG00000001999	ENSDART00000004120	7	19	19	AGCCGCTGCCCCAAGAATGAGCG	5	+	3130	3672
ENSDARG00000001999	ENSDART00000004120	7	19	19	AGAAGCGCAGTGTTTTCTGCAGGA	6	+	3017	3672
ENSDARG00000001999	ENSDART00000004120	7	20	20	CTCTTCTCCTTGGCTGCAGGTTTG	6	+	3402	3672
ENSDARG00000001999	ENSDART00000004120	7	20	20	TTCGGCCTCCTGTGGAGCAGGAGTA	7	+	3186	3672
ENSDARG00000001999	ENSDART00000004120	7	20	20	GTTCCCTGCGAGGAGGTGCAGGA	5	+	3264	3672
ENSDARG00000001999	ENSDART00000004120	7	20	20	GTACTCTTCTCCTTGGCTGCAGGT	6	+	3399	3672
ENSDARG00000001999	ENSDART00000012409	7	6	6	AAACTATGCGGCCTGGACTTTGTA	6	+	715	2595
ENSDARG00000001999	ENSDART00000012409	7	10	10	AGCAAACCATTCAGGGGGTGGTAC	6	+	1117	2595
ENSDARG00000001999	ENSDART00000012409	7	10	10	AACAGCAAACCATTCAGGGGGTGGT	7	+	1114	2595
ENSDARG00000001999	ENSDART00000012409	7	10	10	AGCAAACCATTCAGGGGGTGGTA	5	+	1117	2595
ENSDARG00000001999	ENSDART00000012409	7	11	11	TACTGCATCGCTGAGGACTTTGAT	6	+	1189	2595
ENSDARG00000001999	ENSDART00000012409	7	11	11	GACTACAAAGGGGGCGTGTGCATAG	7	+	1261	2595
ENSDARG00000001999	ENSDART00000012409	7	12	12	TTCAGCACAGAGCCAATGGTGAGTC	7	+	1406	2595
ENSDARG00000001999	ENSDART00000012409	7	14	14	CTCTACCACATCCAGAGAAGAAGCA	7	+	1715	2595
ENSDARG00000001999	ENSDART00000012409	7	14	14	TACCACATCCAGAGAAGAAGCATAA	7	+	1718	2595
ENSDARG00000001999	ENSDART00000012409	7	14	14	CTCGGCACCTTGTGCGGGAGGTGAG	7	+	1773	2595
ENSDARG00000001999	ENSDART00000012409	7	16	16	CCCTCAAACAAGACCGGTGGTTGGC	7	+	1869	2595
ENSDARG00000001999	ENSDART00000012409	7	16	16	AAACAAGACCGGTGGTTGGCTCT	5	+	1874	2595
ENSDARG00000001999	ENSDART00000012409	7	17	17	ATCCGCTGCCTGAGGAAGGTGAC	5	+	1993	2595
ENSDARG00000001999	ENSDART00000012409	7	17	17	AACATCCGCTGCCTGAGGAAGGT	5	+	1990	2595
ENSDARG00000001999	ENSDART00000012409	7	18	18	CCCAAAGCCCAGGAGAGCTGTGTGC	7	+	2248	2595
ENSDARG00000001999	ENSDART00000012409	7	18	18	AGCCGCTGCCCCAAGAATGAGCG	5	+	2275	2595
ENSDARG00000001999	ENSDART00000012409	7	18	18	AGAAGCGCAGTGTTTTCTGCAGGA	6	+	2162	2595
ENSDARG00000001999	ENSDART00000017949	7	6	6	AAACTATGCGGCCTGGACTTTGTA	6	+	715	2586
ENSDARG00000001999	ENSDART00000017949	7	10	10	AGCAAACCATTCAGGGGGTGGTAC	6	+	1117	2586
ENSDARG00000001999	ENSDART00000017949	7	10	10	AACAGCAAACCATTCAGGGGGTGGT	7	+	1114	2586
ENSDARG00000001999	ENSDART00000017949	7	10	10	AGCAAACCATTCAGGGGGTGGTA	5	+	1117	2586
ENSDARG00000001999	ENSDART00000017949	7	11	11	GACTACAAAGGGGGCGTGTGCATAG	7	+	1261	2586
ENSDARG00000001999	ENSDART00000017949	7	11	11	TACTGCATCGCTGAGGACTTTGAT	6	+	1189	2586
ENSDARG00000001999	ENSDART00000017949	7	12	12	TTCAGCACAGAGCCAATGGTGAGTC	7	+	1406	2586
ENSDARG00000001999	ENSDART00000017949	7	14	14	TACCACATCCAGAGAAGAAGCATAA	7	+	1718	2586
ENSDARG00000001999	ENSDART00000017949	7	14	14	CTCGGCACCTTGTGCGGGAGGTGAG	7	+	1773	2586
ENSDARG00000001999	ENSDART00000017949	7	14	14	CTCTACCACATCCAGAGAAGAAGCA	7	+	1715	2586
ENSDARG00000001999	ENSDART00000017949	7	16	16	AAACAAGACCGGTGGTTGGCTCT	5	+	1874	2586
ENSDARG00000001999	ENSDART00000017949	7	16	16	CCCTCAAACAAGACCGGTGGTTGGC	7	+	1869	2586
ENSDARG00000001999	ENSDART00000017949	7	17	17	ATCCGCTGCCTGAGGAAGGTGAC	5	+	1993	2586
ENSDARG00000001999	ENSDART00000017949	7	17	17	AACATCCGCTGCCTGAGGAAGGT	5	+	1990	2586
ENSDARG00000001999	ENSDART00000017949	7	18	18	CCCAAAGCCCAGGAGAGCTGTGTGC	7	+	2248	2586
ENSDARG00000001999	ENSDART00000017949	7	18	18	AGCCGCTGCCCCAAGAATGAGCG	5	+	2275	2586
ENSDARG00000001999	ENSDART00000017949	7	18	18	AGAAGCGCAGTGTTTTCTGCAGGA	6	+	2162	2586
ENSDARG00000001999	ENSDART00000092657	7	6	6	AAACTATGCGGCCTGGACTTTGTA	6	+	715	2280
ENSDARG00000001999	ENSDART00000092657	7	9	9	AACAGCAAACCATTCAGGGGGTGGT	7	+	1102	2280
ENSDARG00000001999	ENSDART00000092657	7	9	9	AGCAAACCATTCAGGGGGTGGTAC	6	+	1105	2280
ENSDARG00000001999	ENSDART00000092657	7	9	9	AGCAAACCATTCAGGGGGTGGTA	5	+	1105	2280
ENSDARG00000001999	ENSDART00000092657	7	10	10	TACTGCATCGCTGAGGACTTTGAT	6	+	1180	2280
ENSDARG00000001999	ENSDART00000092657	7	10	10	GACTACAAAGGGGGCGTGTGCATAG	7	+	1252	2280
ENSDARG00000001999	ENSDART00000092657	7	11	11	TTCAGCACAGAGCCAATGGTGAGTC	7	+	1397	2280
ENSDARG00000001999	ENSDART00000092657	7	17	17	ATCCGCTGCCTGAGGAAGGTGAC	5	+	1819	2280
ENSDARG00000001999	ENSDART00000092657	7	17	17	AACATCCGCTGCCTGAGGAAGGT	5	+	1816	2280
ENSDARG00000001999	ENSDART00000092657	7	18	18	CCCAAAGCCCAGGAGAGCTGTGTGC	7	+	2074	2280
ENSDARG00000001999	ENSDART00000092657	7	18	18	AGCCGCTGCCCCAAGAATGAGCG	5	+	2101	2280
ENSDARG00000001999	ENSDART00000092657	7	18	18	AGAAGCGCAGTGTTTTCTGCAGGA	6	+	1988	2280
ENSDARG00000001999	ENSDART00000092666	7	6	6	AAACTATGCGGCCTGGACTTTGTA	6	+	730	2787
ENSDARG00000001999	ENSDART00000092666	7	9	9	AGCAAACCATTCAGGGGGTGGTA	5	+	1120	2787
ENSDARG00000001999	ENSDART00000092666	7	9	9	AACAGCAAACCATTCAGGGGGTGGT	7	+	1117	2787
ENSDARG00000001999	ENSDART00000092666	7	9	9	AGCAAACCATTCAGGGGGTGGTAC	6	+	1120	2787
ENSDARG00000001999	ENSDART00000092666	7	10	10	GACTACAAAGGGGGCGTGTGCATAG	7	+	1267	2787
ENSDARG00000001999	ENSDART00000092666	7	10	10	TACTGCATCGCTGAGGACTTTGAT	6	+	1195	2787
ENSDARG00000001999	ENSDART00000092666	7	11	11	TTCAGCACAGAGCCAATGGTGAGTC	7	+	1412	2787
ENSDARG00000001999	ENSDART00000092666	7	13	13	TACCACATCCAGAGAAGAAGCATAA	7	+	1724	2787
ENSDARG00000001999	ENSDART00000092666	7	13	13	CTCGGCACCTTGTGCGGGAGGTGAG	7	+	1779	2787
ENSDARG00000001999	ENSDART00000092666	7	13	13	CTCTACCACATCCAGAGAAGAAGCA	7	+	1721	2787
ENSDARG00000001999	ENSDART00000092666	7	14	14	AAACAAGACCGGTGGTTGGCTCT	5	+	1871	2787
ENSDARG00000001999	ENSDART00000092666	7	14	14	CCCTCAAACAAGACCGGTGGTTGGC	7	+	1866	2787
ENSDARG00000001999	ENSDART00000092666	7	15	15	ATCCGCTGCCTGAGGAAGGTGAC	5	+	1990	2787
ENSDARG00000001999	ENSDART00000092666	7	15	15	AACATCCGCTGCCTGAGGAAGGT	5	+	1987	2787
ENSDARG00000001999	ENSDART00000092666	7	16	16	AGAAGCGCAGTGTTTTCTGCAGGA	6	+	2159	2787
ENSDARG00000001999	ENSDART00000092666	7	16	16	CCCAAAGCCCAGGAGAGCTGTGTGC	7	+	2245	2787
ENSDARG00000001999	ENSDART00000092666	7	16	16	AGCCGCTGCCCCAAGAATGAGCG	5	+	2272	2787
ENSDARG00000001999	ENSDART00000092666	7	17	17	TTCGGCCTCCTGTGGAGCAGGAGTA	7	+	2328	2787
ENSDARG00000001999	ENSDART00000092666	7	17	17	GTTCCCTGCGAGGAGGTGCAGGA	5	+	2406	2787
ENSDARG00000001999	ENSDART00000092666	7	18	18	CTCTTCTCCTTGGCTGCAGGTTTG	6	+	2517	2787
ENSDARG00000001999	ENSDART00000092666	7	18	18	GTACTCTTCTCCTTGGCTGCAGGT	6	+	2514	2787
ENSDARG00000001999	ENSDART00000099232	7	2	2	TTCACCCACAGATTATGATTTTGCC	7	+	87	459
ENSDARG00000001999	ENSDART00000099232	7	2	2	TTATCCACCTGTACAGGTTTGGTAA	7	+	397	459
ENSDARG00000001999	ENSDART00000099232	7	2	2	TTATCCACCTGTACAGGTTTGGTA	6	+	397	459
ENSDARG00000001999	ENSDART00000099232	7	2	2	GCCATCCCACGTGCTGGCAGAGGGG	7	+	258	459
ENSDARG00000001999	ENSDART00000099232	7	2	2	AAACCATTCTGATTCATCTGTGGCT	7	+	372	459
ENSDARG00000002193	ENSDART00000027000	7	1	1	GTTGACACCGGGAGTGCGGGTGTA	6	-	583	1062
ENSDARG00000002193	ENSDART00000027000	7	1	1	GTTGACACCGGGAGTGCGGGTGT	5	-	584	1062
ENSDARG00000002193	ENSDART00000027000	7	1	1	GTTCTCCCCGAAACGGAAGTTGCT	6	-	439	1062
ENSDARG00000002193	ENSDART00000027000	7	1	1	GGCCACCCCCATGATGGCATGGTTC	7	-	459	1062
ENSDARG00000002193	ENSDART00000027000	7	1	1	GCCCTCTTCCTCTTCGAAGGGGTT	6	-	985	1062
ENSDARG00000002193	ENSDART00000027000	7	1	1	GCCACCCCCATGATGGCATGGTTC	6	-	459	1062
ENSDARG00000002193	ENSDART00000027000	7	1	1	GCAACCAGCAGATGAGGAAGGCGAT	7	-	784	1062
ENSDARG00000002193	ENSDART00000027000	7	1	1	GACTCCTGCTGCTGCGCTGCCGCC	6	-	705	1062
ENSDARG00000002193	ENSDART00000027000	7	1	1	ACCAGCAGATGAGGAAGGCGATGAC	7	-	781	1062
ENSDARG00000002193	ENSDART00000027000	7	1	1	ACACCAGCCGGCCATAGCAGAAGAA	7	-	667	1062
ENSDARG00000002235	ENSDART00000005884	7	1	1	AGAAACACACTTGCGAGGGCGAG	5	-	49	1722
ENSDARG00000002235	ENSDART00000005884	7	3	3	CGCCACATCTCGGCCTCTGCATTG	6	-	263	1722
ENSDARG00000002235	ENSDART00000005884	7	4	4	CTCTGCTTCATCAAAATGTGTGTCT	7	-	636	1722
ENSDARG00000002235	ENSDART00000005884	7	4	4	CTCGCCCACTTTTGGAGTGTAGTTC	7	-	390	1722
ENSDARG00000002235	ENSDART00000005884	7	4	4	CTCGCCATCAAATGGGGTGCTGTC	6	-	565	1722
ENSDARG00000002235	ENSDART00000005884	7	4	4	TTCCGCAAAGAAAAGCATGATGT	5	-	530	1722
ENSDARG00000002235	ENSDART00000005884	7	4	4	CACGGCCTCCCAAACTCTGAATGC	6	-	442	1722
ENSDARG00000002235	ENSDART00000005884	7	4	4	TCCCTCGCCATCAAATGGGGTGCT	6	-	568	1722
ENSDARG00000002235	ENSDART00000005884	7	5	5	ACAGGCTACCATATATTTGCTGGA	6	-	839	1722
ENSDARG00000002235	ENSDART00000005884	7	10	10	AGCACCTCCTCATCTGTGCCGGC	5	-	1534	1722
ENSDARG00000002235	ENSDART00000005884	7	10	10	AGAGCCCCCAGAGTGATGAGTAC	5	-	1639	1722
ENSDARG00000002235	ENSDART00000005884	7	10	10	TTAAACTTCCAGTACTTATTGGCT	6	-	1422	1722
ENSDARG00000002235	ENSDART00000005884	7	10	10	CACCTCCTCATCTGTGCCGGCTCT	6	-	1531	1722
ENSDARG00000002506	ENSDART00000018972	7	3	3	CAATCCGCAGAGGGCGAGGAAGAC	6	+	287	456
ENSDARG00000002506	ENSDART00000018972	7	4	4	GCCAAAGACTCATCCTGTAGCAGAC	7	+	449	456
ENSDARG00000002685	ENSDART00000012483	7	2	1	CACCACAAACTTGTTGTGAAGGA	5	-	29	1245
ENSDARG00000002685	ENSDART00000012483	7	2	1	ACCACCACAAACTTGTTGTGAAGGA	7	-	29	1245
ENSDARG00000002685	ENSDART00000012483	7	4	3	TTCACCACCACCAGGTCTGGCTTT	6	-	333	1245
ENSDARG00000002685	ENSDART00000012483	7	4	3	GTTCACCACCACCAGGTCTGGCTTT	7	-	333	1245
ENSDARG00000002685	ENSDART00000012483	7	5	4	TTCCACAGCCCACTGTCGACTGT	5	-	383	1245
ENSDARG00000002685	ENSDART00000012483	7	6	5	AACACCCCATGCTTCTGCGACGTG	6	-	727	1245
ENSDARG00000002685	ENSDART00000012483	7	6	5	TGCTTCTGCGACGTGTTGCAGCA	5	-	719	1245
ENSDARG00000002685	ENSDART00000012483	7	6	5	TTCTGCGACGTGTTGCAGCAGAA	5	-	716	1245
ENSDARG00000002685	ENSDART00000012483	7	6	5	CAACACCCCATGCTTCTGCGACGTG	7	-	727	1245
ENSDARG00000002685	ENSDART00000012483	7	6	5	ACCCCATGCTTCTGCGACGTGTTG	6	-	724	1245
ENSDARG00000002685	ENSDART00000012483	7	9	8	CCCGTCCCCAAGTATGGTGGAATAG	7	-	1106	1245
ENSDARG00000002685	ENSDART00000012483	7	9	8	AAAGTCATCAACCCGAGGCCTAA	5	-	986	1245
ENSDARG00000002685	ENSDART00000012483	7	9	8	AAAGTCATCAACCCGAGGCCTAA	5	-	1007	1245
ENSDARG00000002685	ENSDART00000012483	7	9	8	AAAGTCATCATACCGAGGCCTAA	5	-	1028	1245
ENSDARG00000002685	ENSDART00000012483	7	10	9	GGCTTCGCCCAGTGGTTTGCAGGC	6	-	1179	1245
ENSDARG00000003021	ENSDART00000009184	7	1	1	AAAAGCAGAACTCGCAGCGTGGTGT	7	+	40	1134
ENSDARG00000003021	ENSDART00000009184	7	4	4	GACTGCTGCCCAGAATCTGCTGGA	6	+	372	1134
ENSDARG00000003021	ENSDART00000009184	7	4	4	TTACGCGGCTGCCGTTGGAGGAGCC	7	+	342	1134
ENSDARG00000003021	ENSDART00000009184	7	5	5	ATCCTCAAACTTCGGGAGAAGTA	5	+	496	1134
ENSDARG00000003021	ENSDART00000009184	7	7	7	AACGTCCCCTTTGAAGATGGCGTC	6	+	694	1134
ENSDARG00000003021	ENSDART00000009184	7	7	7	GTTAACGTCCCCTTTGAAGATGGC	6	+	691	1134
ENSDARG00000003021	ENSDART00000009184	7	9	9	TGCCAATACTGCCCGCTGCTGGA	5	+	936	1134
ENSDARG00000003132	ENSDART00000007487	7	3	3	AGACTCTTCTATGAGCTGGGCTGGG	7	+	103	723
ENSDARG00000003132	ENSDART00000007487	7	5	5	TCCTCCTCCACAGAAGAAGCTGAA	6	+	261	723
ENSDARG00000003132	ENSDART00000007487	7	5	5	TCCTCCACAGAAGAAGCTGAAGAA	6	+	264	723
ENSDARG00000003132	ENSDART00000007487	7	5	5	GTTGTCCTCCTCCACAGAAGAAGCT	7	+	257	723
ENSDARG00000003132	ENSDART00000007487	7	5	5	GTCCTCCTCCACAGAAGAAGCTGAA	7	+	260	723
ENSDARG00000003132	ENSDART00000007487	7	5	5	GTAGCCAGAGGACTTGTTTGTGTGT	7	+	210	723
ENSDARG00000003132	ENSDART00000007487	7	5	5	CTCCTCCACAGAAGAAGCTGAAGAA	7	+	263	723
ENSDARG00000003132	ENSDART00000007487	7	5	5	CTCCACAGAAGAAGCTGAAGAAGAG	7	+	266	723
ENSDARG00000003132	ENSDART00000007487	7	6	6	GTATCACACACCAAGAGATGATTAA	7	+	407	723
ENSDARG00000003132	ENSDART00000007487	7	7	7	CTCGTCCGCAGACATGGCGTCTAC	6	+	577	723
ENSDARG00000003132	ENSDART00000087571	7	3	3	AGACTCTTCTATGAGCTGGGCTGGG	7	+	103	723
ENSDARG00000003132	ENSDART00000087571	7	5	5	TCCTCCTCCACAGAAGAAGCTGAA	6	+	261	723
ENSDARG00000003132	ENSDART00000087571	7	5	5	TCCTCCACAGAAGAAGCTGAAGAA	6	+	264	723
ENSDARG00000003132	ENSDART00000087571	7	5	5	GTTGTCCTCCTCCACAGAAGAAGCT	7	+	257	723
ENSDARG00000003132	ENSDART00000087571	7	5	5	GTCCTCCTCCACAGAAGAAGCTGAA	7	+	260	723
ENSDARG00000003132	ENSDART00000087571	7	5	5	GTAGCCAGAGGACTTGTTTGTGTGT	7	+	210	723
ENSDARG00000003132	ENSDART00000087571	7	5	5	CTCCTCCACAGAAGAAGCTGAAGAA	7	+	263	723
ENSDARG00000003132	ENSDART00000087571	7	5	5	CTCCACAGAAGAAGCTGAAGAAGAG	7	+	266	723
ENSDARG00000003132	ENSDART00000087571	7	6	6	GTATCACACACCAAGAGATGATTAA	7	+	407	723
ENSDARG00000003132	ENSDART00000087571	7	7	7	CTCGTCCGCAGACATGGCGTCTAC	6	+	577	723
ENSDARG00000003193	ENSDART00000025451	7	2	1	GCATTCCCCGTGTCGTCTGTGGCC	6	+	35	1281
ENSDARG00000003193	ENSDART00000025451	7	2	1	AGACACATCTTGTCAGGATGTAGTC	7	+	66	1281
ENSDARG00000003193	ENSDART00000025451	7	3	2	TTCGACAACAAGGGCAGCTGCAGTC	7	+	506	1281
ENSDARG00000003193	ENSDART00000025451	7	3	2	GACCGCTTACAGCAGGCTTTTAG	5	+	625	1281
ENSDARG00000003193	ENSDART00000025451	7	3	2	GGCAGCTGCAGTCTTTGCAGGCGCA	7	+	518	1281
ENSDARG00000003193	ENSDART00000025451	7	3	2	ACCATCAGCGCCACGGGGCTGAGCT	7	+	914	1281
ENSDARG00000003193	ENSDART00000025451	7	3	2	ACCATCAGCGCCACGGGGCTGAG	5	+	914	1281
ENSDARG00000003193	ENSDART00000025451	7	3	2	TTCTTCGACAACAAGGGCAGCTGCA	7	+	503	1281
ENSDARG00000003193	ENSDART00000025451	7	3	2	AACAAAACCGAAGACTGCATGATAC	7	+	764	1281
ENSDARG00000003193	ENSDART00000025451	7	3	2	GGCCCATGCTAAGTTTTGGGAAGAT	7	+	666	1281
ENSDARG00000003193	ENSDART00000025451	7	5	4	AACTTCCTCCATCTTGGAGTTTAAC	7	+	1158	1281
ENSDARG00000003193	ENSDART00000025451	7	5	4	GCAGCCTCCAGAACCCGCTGGTGTC	7	+	1220	1281
ENSDARG00000003193	ENSDART00000025451	7	5	4	AACTTCCTCCATCTTGGAGTTTAA	6	+	1158	1281
ENSDARG00000003193	ENSDART00000098848	7	1	1	AGACACATCTTGTCAGGATGTAGTC	7	+	75	1209
ENSDARG00000003193	ENSDART00000098848	7	1	1	GCATTCCCCGTGTCGTCTGTGGCC	6	+	44	1209
ENSDARG00000003193	ENSDART00000098848	7	3	3	TTCTTCGACAACAAGGGCAGCTGCA	7	+	482	1209
ENSDARG00000003193	ENSDART00000098848	7	3	3	TTCGACAACAAGGGCAGCTGCAGTC	7	+	485	1209
ENSDARG00000003193	ENSDART00000098848	7	3	3	GGCCCATGCTAAGTTTTGGGAAGAT	7	+	645	1209
ENSDARG00000003193	ENSDART00000098848	7	3	3	GGCAGCTGCAGTCTTTGCAGGCGCA	7	+	497	1209
ENSDARG00000003193	ENSDART00000098848	7	3	3	AACAAAACCGAAGACTGCATGATAC	7	+	743	1209
ENSDARG00000003193	ENSDART00000098848	7	3	3	GACCGCTTACAGCAGGCTTTTAG	5	+	604	1209
ENSDARG00000003193	ENSDART00000098848	7	3	3	ACCATCAGCGCCACGGGGCTGAGCT	7	+	893	1209
ENSDARG00000003193	ENSDART00000098848	7	3	3	ACCATCAGCGCCACGGGGCTGAG	5	+	893	1209
ENSDARG00000003193	ENSDART00000098848	7	6	6	GCAGCCTCCAGAACCCGCTGGTGTC	7	+	1166	1209
ENSDARG00000003193	ENSDART00000098848	7	6	6	GTCTTCATCCAGAGGGTGTGTATGT	7	+	1193	1209
ENSDARG00000003203	ENSDART00000053518	7	1	1	AAACCCTAATGTGCGGGTTAGTCT	6	+	57	993
ENSDARG00000003203	ENSDART00000053518	7	1	1	CTAAAAACCCTAATGTGCGGGTTAG	7	+	53	993
ENSDARG00000003203	ENSDART00000053518	7	1	1	GACCTAAAAACCCTAATGTGCGGGT	7	+	50	993
ENSDARG00000003203	ENSDART00000053518	7	2	2	GGCTTCAACTTTCTGGTGGCTGCG	6	+	319	993
ENSDARG00000003203	ENSDART00000053518	7	2	2	GGCTTCAACTTTCTGGTGGCTGC	5	+	319	993
ENSDARG00000003203	ENSDART00000053518	7	2	2	GGCACCATCAAGATTGGAGTTGAG	6	+	403	993
ENSDARG00000003203	ENSDART00000053518	7	3	3	GCATCACTCTCTATGCGGTCGAG	5	+	530	993
ENSDARG00000003203	ENSDART00000053518	7	4	4	GTCTACCACTCCGATGTCTTTGCT	6	+	697	993
ENSDARG00000003203	ENSDART00000053518	7	6	6	GAATGCAACTCTGGCTGGAGGAGTG	7	+	906	993
ENSDARG00000003203	ENSDART00000053521	7	1	1	AAACCCTAATGTGCGGGTTAGTCT	6	+	57	1461
ENSDARG00000003203	ENSDART00000053521	7	1	1	CTAAAAACCCTAATGTGCGGGTTAG	7	+	53	1461
ENSDARG00000003203	ENSDART00000053521	7	1	1	GACCTAAAAACCCTAATGTGCGGGT	7	+	50	1461
ENSDARG00000003203	ENSDART00000053521	7	2	2	GGCTTCAACTTTCTGGTGGCTGC	5	+	319	1461
ENSDARG00000003203	ENSDART00000053521	7	2	2	GGCACCATCAAGATTGGAGTTGAG	6	+	403	1461
ENSDARG00000003203	ENSDART00000053521	7	2	2	GGCTTCAACTTTCTGGTGGCTGCG	6	+	319	1461
ENSDARG00000003203	ENSDART00000053521	7	3	3	GCATCACTCTCTATGCGGTCGAG	5	+	530	1461
ENSDARG00000003203	ENSDART00000053521	7	4	4	GTCTACCACTCCGATGTCTTTGCT	6	+	697	1461
ENSDARG00000003203	ENSDART00000053521	7	6	6	GAATGCAACTCTGGCTGGAGGAGTG	7	+	906	1461
ENSDARG00000003203	ENSDART00000053521	7	8	8	GTCTCCTGCTACACAGGGAGGATAC	7	+	1212	1461
ENSDARG00000003263	ENSDART00000011823	7	2	2	CTCAACTCCCAAAAGATGACTTT	5	-	47	657
ENSDARG00000003263	ENSDART00000011823	7	3	3	GCAGCCGTCTTCTTTCTTTGGCA	5	-	237	657
ENSDARG00000003263	ENSDART00000011823	7	3	3	CTCTGCATCTGTGCCATGTTGAGAC	7	-	69	657
ENSDARG00000003263	ENSDART00000011823	7	3	3	ACCTTCTTCACCTTTTTCTTTGGTC	7	-	194	657
ENSDARG00000003263	ENSDART00000011823	7	4	4	TTATGCAGAGGTAAGAAGAGTTC	5	-	295	657
ENSDARG00000003269	ENSDART00000040163	7	1	1	GACCCAGTCGATGGTGTGGAAGTC	6	-	106	2298
ENSDARG00000003269	ENSDART00000040163	7	4	4	AAAGACAAAGCCCAGAAGGTGAA	5	-	487	2298
ENSDARG00000003269	ENSDART00000040163	7	4	4	AGAGCCGCAGGCATACGGCGCAAAC	7	-	540	2298
ENSDARG00000003269	ENSDART00000040163	7	6	6	AGCCACAGAAACACCAGCAGCCGAC	7	-	798	2298
ENSDARG00000003269	ENSDART00000040163	7	6	6	AACACCAGCAGCCGACGCCGCCGAC	7	-	789	2298
ENSDARG00000003269	ENSDART00000040163	7	6	6	AGAAACACCAGCAGCCGACGCCGCC	7	-	792	2298
ENSDARG00000003269	ENSDART00000040163	7	7	7	TGCGTCGGCGGCACCAGGCGATGTT	7	-	1078	2298
ENSDARG00000003269	ENSDART00000040163	7	7	7	GAAGACCCCCAGCAGGATGAAGGG	6	-	1021	2298
ENSDARG00000003269	ENSDART00000040163	7	7	7	CCCCCAGCAGGATGAAGGGGAAGAG	7	-	1015	2298
ENSDARG00000003269	ENSDART00000040163	7	7	7	GTACTCACCGAAGCGAGTGGACTTG	7	-	1101	2298
ENSDARG00000003269	ENSDART00000040163	7	7	7	GTCGGCGGCACCAGGCGATGTTTGC	7	-	1075	2298
ENSDARG00000003269	ENSDART00000040163	7	7	7	AGACCCCCAGCAGGATGAAGGGGAA	7	-	1018	2298
ENSDARG00000003269	ENSDART00000040163	7	7	7	ACCCCCAGCAGGATGAAGGGGAA	5	-	1018	2298
ENSDARG00000003269	ENSDART00000040163	7	8	8	TCCAGCGGCCCGCAGTCTGTGAAC	6	-	1224	2298
ENSDARG00000003269	ENSDART00000040163	7	8	8	GACTCCAGCGGCCCGCAGTCTGT	5	-	1228	2298
ENSDARG00000003269	ENSDART00000040163	7	8	8	GGCGGCAGAGGCGGTGTCGGGGCC	6	-	1306	2298
ENSDARG00000003269	ENSDART00000040163	7	9	9	AAACGCACCCAGACATGCGGCGGCT	7	-	1587	2298
ENSDARG00000003269	ENSDART00000040163	7	9	9	GGCGGCTCCCACCATGGCGTAGAG	6	-	1570	2298
ENSDARG00000003269	ENSDART00000040163	7	9	9	AAACGCACCCAGACATGCGGCGGC	6	-	1588	2298
ENSDARG00000003269	ENSDART00000040163	7	10	10	TGCGTCAGAACTGCTAGTGGTGGGT	7	-	1844	2298
ENSDARG00000003269	ENSDART00000040163	7	10	10	GCCGCCATCAGCGGGACGATGTA	5	-	1669	2298
ENSDARG00000003269	ENSDART00000040163	7	10	10	ACCAGCCTCTGGGACTCTTTGGAG	6	-	1941	2298
ENSDARG00000003269	ENSDART00000040163	7	10	10	GAATCCCACCAGCCTCTGGGACTCT	7	-	1947	2298
ENSDARG00000003269	ENSDART00000040163	7	10	10	ATCCCACCAGCCTCTGGGACTCT	5	-	1947	2298
ENSDARG00000003269	ENSDART00000040163	7	11	11	TCCTGCTTACGCCGGGCGTTTTC	5	-	2002	2298
ENSDARG00000003269	ENSDART00000040163	7	11	11	TCCTGCTTACGCCGGGCGTTTTCT	6	-	2001	2298
ENSDARG00000003269	ENSDART00000040163	7	11	11	GAATGCTGCGCAGCTTTAGCGGCC	6	-	2093	2298
ENSDARG00000003269	ENSDART00000040163	7	11	11	TGCTGCGCAGCTTTAGCGGCCGCG	6	-	2090	2298
ENSDARG00000003269	ENSDART00000049311	7	1	1	GTCTCCTCCGCCACCGTCGTAGGG	6	-	40	2181
ENSDARG00000003269	ENSDART00000049311	7	2	2	CCCCCATTAGACATGGCGTAGTT	5	-	100	2181
ENSDARG00000003269	ENSDART00000049311	7	2	2	GACCCAGTCGATGGTGTGGAAGTC	6	-	205	2181
ENSDARG00000003269	ENSDART00000049311	7	2	2	CCCCCATTAGACATGGCGTAGTTC	6	-	99	2181
ENSDARG00000003269	ENSDART00000049311	7	5	5	AAAGACAAAGCCCAGAAGGTGAA	5	-	586	2181
ENSDARG00000003269	ENSDART00000049311	7	5	5	AGAGCCGCAGGCATACGGCGCAAAC	7	-	639	2181
ENSDARG00000003269	ENSDART00000049311	7	7	7	AACACCAGCAGCCGACGCCGCCGAC	7	-	888	2181
ENSDARG00000003269	ENSDART00000049311	7	7	7	AGCCACAGAAACACCAGCAGCCGAC	7	-	897	2181
ENSDARG00000003269	ENSDART00000049311	7	7	7	AGAAACACCAGCAGCCGACGCCGCC	7	-	891	2181
ENSDARG00000003269	ENSDART00000049311	7	8	8	GTCGGCGGCACCAGGCGATGTTTGC	7	-	1174	2181
ENSDARG00000003269	ENSDART00000049311	7	8	8	GTACTCACCGAAGCGAGTGGACTTG	7	-	1200	2181
ENSDARG00000003269	ENSDART00000049311	7	8	8	GAAGACCCCCAGCAGGATGAAGGG	6	-	1120	2181
ENSDARG00000003269	ENSDART00000049311	7	8	8	CCCCCAGCAGGATGAAGGGGAAGAG	7	-	1114	2181
ENSDARG00000003269	ENSDART00000049311	7	8	8	TGCGTCGGCGGCACCAGGCGATGTT	7	-	1177	2181
ENSDARG00000003269	ENSDART00000049311	7	8	8	ACCCCCAGCAGGATGAAGGGGAA	5	-	1117	2181
ENSDARG00000003269	ENSDART00000049311	7	8	8	AGACCCCCAGCAGGATGAAGGGGAA	7	-	1117	2181
ENSDARG00000003269	ENSDART00000049311	7	9	9	TCCAGCGGCCCGCAGTCTGTGAAC	6	-	1323	2181
ENSDARG00000003269	ENSDART00000049311	7	9	9	GACTCCAGCGGCCCGCAGTCTGT	5	-	1327	2181
ENSDARG00000003269	ENSDART00000049311	7	9	9	GGCGGCAGAGGCGGTGTCGGGGCC	6	-	1405	2181
ENSDARG00000003269	ENSDART00000049311	7	10	10	GGCGGCTCCCACCATGGCGTAGAG	6	-	1669	2181
ENSDARG00000003269	ENSDART00000049311	7	10	10	AAACGCACCCAGACATGCGGCGGC	6	-	1687	2181
ENSDARG00000003269	ENSDART00000049311	7	10	10	AAACGCACCCAGACATGCGGCGGCT	7	-	1686	2181
ENSDARG00000003269	ENSDART00000049311	7	11	11	GCCGCCATCAGCGGGACGATGTA	5	-	1768	2181
ENSDARG00000003269	ENSDART00000049311	7	11	11	TGCGTCAGAACTGCTAGTGGTGGGT	7	-	1943	2181
ENSDARG00000003269	ENSDART00000049311	7	11	11	GAATCCCACCAGCCTCTGGGACTCT	7	-	2046	2181
ENSDARG00000003269	ENSDART00000049311	7	11	11	ATCCCACCAGCCTCTGGGACTCT	5	-	2046	2181
ENSDARG00000003269	ENSDART00000049311	7	11	11	ACCAGCCTCTGGGACTCTTTGGAG	6	-	2040	2181
ENSDARG00000003269	ENSDART00000049311	7	12	12	TCCTGCTTACGCCGGGCGTTTTC	5	-	2101	2181
ENSDARG00000003269	ENSDART00000049311	7	12	12	TCCTGCTTACGCCGGGCGTTTTCT	6	-	2100	2181
ENSDARG00000003269	ENSDART00000102635	7	2	1	GTTGTCGTCCTCAGTGGTGTGGAA	6	-	121	2256
ENSDARG00000003269	ENSDART00000102635	7	2	1	GTCTCCGTCCAGCAGGTTGTCGTC	6	-	136	2256
ENSDARG00000003269	ENSDART00000102635	7	2	1	CTCTTCGTCACTGCTGGCGCTGGT	6	-	67	2256
ENSDARG00000003269	ENSDART00000102635	7	2	1	GTCGTCCTCAGTGGTGTGGAAGTC	6	-	118	2256
ENSDARG00000003269	ENSDART00000102635	7	2	1	GGCGTCTCCGTCCAGCAGGTTGT	5	-	140	2256
ENSDARG00000003269	ENSDART00000102635	7	3	2	CCCCCATTAGACATGGCGTAGTTC	6	-	174	2256
ENSDARG00000003269	ENSDART00000102635	7	3	2	GACCCAGTCGATGGTGTGGAAGTC	6	-	280	2256
ENSDARG00000003269	ENSDART00000102635	7	3	2	CCCCCATTAGACATGGCGTAGTT	5	-	175	2256
ENSDARG00000003269	ENSDART00000102635	7	6	5	AGAGCCGCAGGCATACGGCGCAAAC	7	-	714	2256
ENSDARG00000003269	ENSDART00000102635	7	6	5	AAAGACAAAGCCCAGAAGGTGAA	5	-	661	2256
ENSDARG00000003269	ENSDART00000102635	7	8	7	AACACCAGCAGCCGACGCCGCCGAC	7	-	963	2256
ENSDARG00000003269	ENSDART00000102635	7	8	7	AGAAACACCAGCAGCCGACGCCGCC	7	-	966	2256
ENSDARG00000003269	ENSDART00000102635	7	8	7	AGCCACAGAAACACCAGCAGCCGAC	7	-	972	2256
ENSDARG00000003269	ENSDART00000102635	7	9	8	GTACTCACCGAAGCGAGTGGACTTG	7	-	1275	2256
ENSDARG00000003269	ENSDART00000102635	7	9	8	GTCGGCGGCACCAGGCGATGTTTGC	7	-	1249	2256
ENSDARG00000003269	ENSDART00000102635	7	9	8	GAAGACCCCCAGCAGGATGAAGGG	6	-	1195	2256
ENSDARG00000003269	ENSDART00000102635	7	9	8	TGCGTCGGCGGCACCAGGCGATGTT	7	-	1252	2256
ENSDARG00000003269	ENSDART00000102635	7	9	8	AGACCCCCAGCAGGATGAAGGGGAA	7	-	1192	2256
ENSDARG00000003269	ENSDART00000102635	7	9	8	CCCCCAGCAGGATGAAGGGGAAGAG	7	-	1189	2256
ENSDARG00000003269	ENSDART00000102635	7	9	8	ACCCCCAGCAGGATGAAGGGGAA	5	-	1192	2256
ENSDARG00000003269	ENSDART00000102635	7	10	9	TCCAGCGGCCCGCAGTCTGTGAAC	6	-	1398	2256
ENSDARG00000003269	ENSDART00000102635	7	10	9	GGCGGCAGAGGCGGTGTCGGGGCC	6	-	1480	2256
ENSDARG00000003269	ENSDART00000102635	7	10	9	GACTCCAGCGGCCCGCAGTCTGT	5	-	1402	2256
ENSDARG00000003269	ENSDART00000102635	7	11	10	GGCGGCTCCCACCATGGCGTAGAG	6	-	1744	2256
ENSDARG00000003269	ENSDART00000102635	7	11	10	AAACGCACCCAGACATGCGGCGGCT	7	-	1761	2256
ENSDARG00000003269	ENSDART00000102635	7	11	10	AAACGCACCCAGACATGCGGCGGC	6	-	1762	2256
ENSDARG00000003269	ENSDART00000102635	7	12	11	TGCGTCAGAACTGCTAGTGGTGGGT	7	-	2018	2256
ENSDARG00000003269	ENSDART00000102635	7	12	11	ACCAGCCTCTGGGACTCTTTGGAG	6	-	2115	2256
ENSDARG00000003269	ENSDART00000102635	7	12	11	ATCCCACCAGCCTCTGGGACTCT	5	-	2121	2256
ENSDARG00000003269	ENSDART00000102635	7	12	11	GAATCCCACCAGCCTCTGGGACTCT	7	-	2121	2256
ENSDARG00000003269	ENSDART00000102635	7	12	11	GCCGCCATCAGCGGGACGATGTA	5	-	1843	2256
ENSDARG00000003269	ENSDART00000102635	7	13	12	TCCTGCTTACGCCGGGCGTTTTC	5	-	2176	2256
ENSDARG00000003269	ENSDART00000102635	7	13	12	TCCTGCTTACGCCGGGCGTTTTCT	6	-	2175	2256
ENSDARG00000003269	ENSDART00000102638	7	1	1	GACCCAGTCGATGGTGTGGAAGTC	6	-	85	2277
ENSDARG00000003269	ENSDART00000102638	7	4	4	AGAGCCGCAGGCATACGGCGCAAAC	7	-	519	2277
ENSDARG00000003269	ENSDART00000102638	7	4	4	AAAGACAAAGCCCAGAAGGTGAA	5	-	466	2277
ENSDARG00000003269	ENSDART00000102638	7	6	6	AACACCAGCAGCCGACGCCGCCGAC	7	-	768	2277
ENSDARG00000003269	ENSDART00000102638	7	6	6	AGCCACAGAAACACCAGCAGCCGAC	7	-	777	2277
ENSDARG00000003269	ENSDART00000102638	7	6	6	AGAAACACCAGCAGCCGACGCCGCC	7	-	771	2277
ENSDARG00000003269	ENSDART00000102638	7	7	7	GAAGACCCCCAGCAGGATGAAGGG	6	-	1000	2277
ENSDARG00000003269	ENSDART00000102638	7	7	7	CCCCCAGCAGGATGAAGGGGAAGAG	7	-	994	2277
ENSDARG00000003269	ENSDART00000102638	7	7	7	GTACTCACCGAAGCGAGTGGACTTG	7	-	1080	2277
ENSDARG00000003269	ENSDART00000102638	7	7	7	GTCGGCGGCACCAGGCGATGTTTGC	7	-	1054	2277
ENSDARG00000003269	ENSDART00000102638	7	7	7	TGCGTCGGCGGCACCAGGCGATGTT	7	-	1057	2277
ENSDARG00000003269	ENSDART00000102638	7	7	7	AGACCCCCAGCAGGATGAAGGGGAA	7	-	997	2277
ENSDARG00000003269	ENSDART00000102638	7	7	7	ACCCCCAGCAGGATGAAGGGGAA	5	-	997	2277
ENSDARG00000003269	ENSDART00000102638	7	9	9	TCCAGCGGCCCGCAGTCTGTGAAC	6	-	1203	2277
ENSDARG00000003269	ENSDART00000102638	7	9	9	GGCGGCAGAGGCGGTGTCGGGGCC	6	-	1285	2277
ENSDARG00000003269	ENSDART00000102638	7	9	9	GACTCCAGCGGCCCGCAGTCTGT	5	-	1207	2277
ENSDARG00000003269	ENSDART00000102638	7	10	10	GGCGGCTCCCACCATGGCGTAGAG	6	-	1549	2277
ENSDARG00000003269	ENSDART00000102638	7	10	10	AAACGCACCCAGACATGCGGCGGCT	7	-	1566	2277
ENSDARG00000003269	ENSDART00000102638	7	10	10	AAACGCACCCAGACATGCGGCGGC	6	-	1567	2277
ENSDARG00000003269	ENSDART00000102638	7	11	11	TGCGTCAGAACTGCTAGTGGTGGGT	7	-	1823	2277
ENSDARG00000003269	ENSDART00000102638	7	11	11	GCCGCCATCAGCGGGACGATGTA	5	-	1648	2277
ENSDARG00000003269	ENSDART00000102638	7	11	11	GAATCCCACCAGCCTCTGGGACTCT	7	-	1926	2277
ENSDARG00000003269	ENSDART00000102638	7	11	11	ATCCCACCAGCCTCTGGGACTCT	5	-	1926	2277
ENSDARG00000003269	ENSDART00000102638	7	11	11	ACCAGCCTCTGGGACTCTTTGGAG	6	-	1920	2277
ENSDARG00000003269	ENSDART00000102638	7	12	12	TGCTGCGCAGCTTTAGCGGCCGCG	6	-	2069	2277
ENSDARG00000003269	ENSDART00000102638	7	12	12	GAATGCTGCGCAGCTTTAGCGGCC	6	-	2072	2277
ENSDARG00000003269	ENSDART00000102638	7	12	12	TCCTGCTTACGCCGGGCGTTTTCT	6	-	1980	2277
ENSDARG00000003269	ENSDART00000102638	7	12	12	TCCTGCTTACGCCGGGCGTTTTC	5	-	1981	2277
ENSDARG00000003495	ENSDART00000047208	7	2	2	GTCTTCTTCTGCCAGCCTGAGGG	5	+	166	4992
ENSDARG00000003495	ENSDART00000047208	7	2	2	AGACACCTCAGCTGTTGCGGCGTT	6	+	98	4992
ENSDARG00000003495	ENSDART00000047208	7	2	2	TTCCTCTGCCACCTGATGTGGTC	5	+	146	4992
ENSDARG00000003495	ENSDART00000047208	7	2	2	CTCTGCCACCTGATGTGGTCTTC	5	+	149	4992
ENSDARG00000003495	ENSDART00000047208	7	2	2	TTCTTCTGCCAGCCTGAGGGCTGT	6	+	169	4992
ENSDARG00000003495	ENSDART00000047208	7	2	2	ACCATCGCCCAAGAGCTGAAGGA	5	+	323	4992
ENSDARG00000003495	ENSDART00000047208	7	2	2	ACAGACACCTCAGCTGTTGCGGCG	6	+	96	4992
ENSDARG00000003495	ENSDART00000047208	7	3	3	GCCCCCTGCAGGAGATGGGACTTT	6	+	444	4992
ENSDARG00000003495	ENSDART00000047208	7	3	3	TTCGGCGCCCCCTGCAGGAGATGGG	7	+	438	4992
ENSDARG00000003495	ENSDART00000047208	7	3	3	TCCTCAAGCGCATGGTGGACTGC	5	+	617	4992
ENSDARG00000003495	ENSDART00000047208	7	3	3	ACATTCGGCGCCCCCTGCAGGAGAT	7	+	435	4992
ENSDARG00000003495	ENSDART00000047208	7	3	3	TGCTCATACAGACACTGCAGTGGAG	7	+	366	4992
ENSDARG00000003495	ENSDART00000047208	7	4	4	TCCTGCCCCATGAGCTGCAGCCTGC	7	+	848	4992
ENSDARG00000003495	ENSDART00000047208	7	4	4	TCCACCTGCCACTGGAGCTGCTGGG	7	+	926	4992
ENSDARG00000003495	ENSDART00000047208	7	4	4	GGCTGCTGCGCTCACCGGTGCCTGT	7	+	794	4992
ENSDARG00000003495	ENSDART00000047208	7	4	4	GTCAGCGGCGTGTGGATGTGGAG	5	+	824	4992
ENSDARG00000003495	ENSDART00000047208	7	4	4	CGCTCCACCTGCCACTGGAGCTGCT	7	+	923	4992
ENSDARG00000003495	ENSDART00000047208	7	4	4	GTCAGCGGCGTGTGGATGTGGAGGT	7	+	824	4992
ENSDARG00000003495	ENSDART00000047208	7	4	4	TCCCGCTTCAGCATCGTAGACTTC	6	+	898	4992
ENSDARG00000003495	ENSDART00000047208	7	4	4	ACCTGCCACTGGAGCTGCTGGGAG	6	+	929	4992
ENSDARG00000003495	ENSDART00000047208	7	5	5	CCCACCTGCATGGCCTCTGCAGAA	6	+	1105	4992
ENSDARG00000003495	ENSDART00000047208	7	8	8	CTCATCTACGGCAATGATGTGGAC	6	+	1456	4992
ENSDARG00000003495	ENSDART00000047208	7	8	8	AGCCTATTCTGAACCTGGAGAAGTT	7	+	1355	4992
ENSDARG00000003495	ENSDART00000047208	7	9	9	CTCTCCCACACTCAGGCAGTGGAG	6	+	1654	4992
ENSDARG00000003495	ENSDART00000047208	7	9	9	TCCCTCGTCCTGTGGTGGCCTTT	5	+	1577	4992
ENSDARG00000003495	ENSDART00000047208	7	9	9	CTCCCACACTCAGGCAGTGGAGTAC	7	+	1656	4992
ENSDARG00000003495	ENSDART00000047208	7	10	10	TTCTACCGCGTGTATGATGGAAAC	6	+	1801	4992
ENSDARG00000003495	ENSDART00000047208	7	11	11	CTACTCATCTCTTGGAGATTTTGTG	7	+	1935	4992
ENSDARG00000003495	ENSDART00000047208	7	11	11	CTCCTACTCATCTCTTGGAGATTTT	7	+	1932	4992
ENSDARG00000003495	ENSDART00000047208	7	12	12	GAAGGCCCCACAGAAGCAGCGGAC	6	+	2098	4992
ENSDARG00000003495	ENSDART00000047208	7	12	12	GACCCATGCTGCACTGGGAGATGCA	7	+	2013	4992
ENSDARG00000003495	ENSDART00000047208	7	13	13	CCCTACAGAGGAAGATGCTGAGAC	6	+	2370	4992
ENSDARG00000003495	ENSDART00000047208	7	17	17	TTAAGCACAGCCCTACTGTGAAGAG	7	+	2795	4992
ENSDARG00000003495	ENSDART00000047208	7	20	20	AGCCCCACCGAAGGGCTTAGCAGTC	7	+	3217	4992
ENSDARG00000003495	ENSDART00000047208	7	20	20	GAAATCATCACGCCAGTTTGATAC	6	+	3339	4992
ENSDARG00000003495	ENSDART00000047208	7	24	24	CCCTGCAACCAGCTCAGTGTTTGTG	7	+	3780	4992
ENSDARG00000003495	ENSDART00000047208	7	25	25	AGCACCTGCTCCACCCGTTGAGGAT	7	+	3858	4992
ENSDARG00000003495	ENSDART00000047208	7	25	25	ACCTGCTCCACCCGTTGAGGATGTT	7	+	3861	4992
ENSDARG00000003495	ENSDART00000047208	7	30	30	CTATCAGGCCGAGTGGCAGCAGGC	6	+	4337	4992
ENSDARG00000003495	ENSDART00000047208	7	30	30	TTAAAAAACAGACATTTGTTGTG	5	+	4364	4992
ENSDARG00000003495	ENSDART00000047208	7	30	30	AAAAACAGACATTTGTTGTGCATGC	7	+	4367	4992
ENSDARG00000003495	ENSDART00000047208	7	31	31	AGAAACGGCCAGGAGACGCAGCT	5	+	4549	4992
ENSDARG00000003495	ENSDART00000047208	7	31	31	GTCCCAAAACTAAAGTGTTGTGTCT	7	+	4517	4992
ENSDARG00000003495	ENSDART00000047208	7	31	31	CAAAACTAAAGTGTTGTGTCTGT	5	+	4521	4992
ENSDARG00000003495	ENSDART00000047208	7	31	31	GTCCCAAAACTAAAGTGTTGTGT	5	+	4517	4992
ENSDARG00000003495	ENSDART00000047208	7	31	31	TCCCAAAACTAAAGTGTTGTGTCT	6	+	4518	4992
ENSDARG00000003495	ENSDART00000047208	7	32	32	GTTAAAGACAGCATGGAGCGTGC	5	+	4615	4992
ENSDARG00000003495	ENSDART00000047208	7	36	36	CTCTTCTCCTACATGGCGGCGGT	5	+	4921	4992
ENSDARG00000003495	ENSDART00000047208	7	36	36	CTCTTCTCCTACATGGCGGCGGTC	6	+	4921	4992
ENSDARG00000003495	ENSDART00000100149	7	2	2	GTCTTCTTCTGCCAGCCTGAGGG	5	+	163	4548
ENSDARG00000003495	ENSDART00000100149	7	2	2	CTCTGCCACCTGATGTGGTCTTC	5	+	146	4548
ENSDARG00000003495	ENSDART00000100149	7	2	2	AGACACCTCAGCTGTTGCGGCGTT	6	+	95	4548
ENSDARG00000003495	ENSDART00000100149	7	2	2	TTCCTCTGCCACCTGATGTGGTC	5	+	143	4548
ENSDARG00000003495	ENSDART00000100149	7	2	2	ACCATCGCCCAAGAGCTGAAGGA	5	+	320	4548
ENSDARG00000003495	ENSDART00000100149	7	2	2	TTCTTCTGCCAGCCTGAGGGCTGT	6	+	166	4548
ENSDARG00000003495	ENSDART00000100149	7	2	2	ACAGACACCTCAGCTGTTGCGGCG	6	+	93	4548
ENSDARG00000003495	ENSDART00000100149	7	3	3	TTCGGCGCCCCCTGCAGGAGATGGG	7	+	435	4548
ENSDARG00000003495	ENSDART00000100149	7	3	3	GCCCCCTGCAGGAGATGGGACTTT	6	+	441	4548
ENSDARG00000003495	ENSDART00000100149	7	3	3	TCCTCAAGCGCATGGTGGACTGC	5	+	614	4548
ENSDARG00000003495	ENSDART00000100149	7	3	3	ACATTCGGCGCCCCCTGCAGGAGAT	7	+	432	4548
ENSDARG00000003495	ENSDART00000100149	7	3	3	TGCTCATACAGACACTGCAGTGGAG	7	+	363	4548
ENSDARG00000003495	ENSDART00000100149	7	4	4	GGCTGCTGCGCTCACCGGTGCCTGT	7	+	791	4548
ENSDARG00000003495	ENSDART00000100149	7	4	4	GTCAGCGGCGTGTGGATGTGGAG	5	+	821	4548
ENSDARG00000003495	ENSDART00000100149	7	4	4	GTCAGCGGCGTGTGGATGTGGAGGT	7	+	821	4548
ENSDARG00000003495	ENSDART00000100149	7	4	4	TCCACCTGCCACTGGAGCTGCTGGG	7	+	923	4548
ENSDARG00000003495	ENSDART00000100149	7	4	4	TCCCGCTTCAGCATCGTAGACTTC	6	+	895	4548
ENSDARG00000003495	ENSDART00000100149	7	4	4	TCCTGCCCCATGAGCTGCAGCCTGC	7	+	845	4548
ENSDARG00000003495	ENSDART00000100149	7	4	4	ACCTGCCACTGGAGCTGCTGGGAG	6	+	926	4548
ENSDARG00000003495	ENSDART00000100149	7	4	4	CGCTCCACCTGCCACTGGAGCTGCT	7	+	920	4548
ENSDARG00000003495	ENSDART00000100149	7	5	5	CCCACCTGCATGGCCTCTGCAGAA	6	+	1102	4548
ENSDARG00000003495	ENSDART00000100149	7	8	8	CTCATCTACGGCAATGATGTGGAC	6	+	1453	4548
ENSDARG00000003495	ENSDART00000100149	7	8	8	AGCCTATTCTGAACCTGGAGAAGTT	7	+	1352	4548
ENSDARG00000003495	ENSDART00000100149	7	9	9	CTCCCACACTCAGGCAGTGGAGTAC	7	+	1653	4548
ENSDARG00000003495	ENSDART00000100149	7	9	9	TCCCTCGTCCTGTGGTGGCCTTT	5	+	1574	4548
ENSDARG00000003495	ENSDART00000100149	7	9	9	CTCTCCCACACTCAGGCAGTGGAG	6	+	1651	4548
ENSDARG00000003495	ENSDART00000100149	7	10	10	TTCTACCGCGTGTATGATGGAAAC	6	+	1798	4548
ENSDARG00000003495	ENSDART00000100149	7	11	11	CTACTCATCTCTTGGAGATTTTGTG	7	+	1932	4548
ENSDARG00000003495	ENSDART00000100149	7	11	11	CTCCTACTCATCTCTTGGAGATTTT	7	+	1929	4548
ENSDARG00000003495	ENSDART00000100149	7	12	12	GACCCATGCTGCACTGGGAGATGCA	7	+	2010	4548
ENSDARG00000003495	ENSDART00000100149	7	12	12	GAAGGCCCCACAGAAGCAGCGGAC	6	+	2095	4548
ENSDARG00000003495	ENSDART00000100149	7	13	13	CCCTACAGAGGAAGATGCTGAGAC	6	+	2298	4548
ENSDARG00000003495	ENSDART00000100149	7	16	16	TTAAGCACAGCCCTACTGTGAAGAG	7	+	2663	4548
ENSDARG00000003495	ENSDART00000100149	7	19	19	AGCCCCACCGAAGGGCTTAGCAGTC	7	+	3085	4548
ENSDARG00000003495	ENSDART00000100149	7	19	19	GAAATCATCACGCCAGTTTGATAC	6	+	3207	4548
ENSDARG00000003495	ENSDART00000100149	7	21	21	CCCTGCAACCAGCTCAGTGTTTGTG	7	+	3507	4548
ENSDARG00000003495	ENSDART00000100149	7	22	22	AGCACCTGCTCCACCCGTTGAGGAT	7	+	3585	4548
ENSDARG00000003495	ENSDART00000100149	7	22	22	ACCTGCTCCACCCGTTGAGGATGTT	7	+	3588	4548
ENSDARG00000003495	ENSDART00000100149	7	26	26	TTAAAAAACAGACATTTGTTGTG	5	+	4028	4548
ENSDARG00000003495	ENSDART00000100149	7	26	26	CTATCAGGCCGAGTGGCAGCAGGC	6	+	4001	4548
ENSDARG00000003495	ENSDART00000100149	7	26	26	AAAAACAGACATTTGTTGTGCATGC	7	+	4031	4548
ENSDARG00000003495	ENSDART00000100149	7	27	27	GTCCCAAAACTAAAGTGTTGTGTCT	7	+	4181	4548
ENSDARG00000003495	ENSDART00000100149	7	27	27	TCCCAAAACTAAAGTGTTGTGTCT	6	+	4182	4548
ENSDARG00000003495	ENSDART00000100149	7	27	27	AGAAACGGCCAGGAGACGCAGCT	5	+	4213	4548
ENSDARG00000003495	ENSDART00000100149	7	27	27	CAAAACTAAAGTGTTGTGTCTGT	5	+	4185	4548
ENSDARG00000003495	ENSDART00000100149	7	27	27	GTCCCAAAACTAAAGTGTTGTGT	5	+	4181	4548
ENSDARG00000003495	ENSDART00000100149	7	28	28	GTTCTCTCCTTCCCATGTGCAGGT	6	+	4273	4548
ENSDARG00000003495	ENSDART00000100149	7	31	31	CTCTTCTCCTACATGGCGGCGGT	5	+	4477	4548
ENSDARG00000003495	ENSDART00000100149	7	31	31	CTCTTCTCCTACATGGCGGCGGTC	6	+	4477	4548
ENSDARG00000003495	ENSDART00000100151	7	2	2	TTCCTCTGCCACCTGATGTGGTC	5	+	143	4584
ENSDARG00000003495	ENSDART00000100151	7	2	2	GTCTTCTTCTGCCAGCCTGAGGG	5	+	163	4584
ENSDARG00000003495	ENSDART00000100151	7	2	2	AGACACCTCAGCTGTTGCGGCGTT	6	+	95	4584
ENSDARG00000003495	ENSDART00000100151	7	2	2	CTCTGCCACCTGATGTGGTCTTC	5	+	146	4584
ENSDARG00000003495	ENSDART00000100151	7	2	2	ACCATCGCCCAAGAGCTGAAGGA	5	+	320	4584
ENSDARG00000003495	ENSDART00000100151	7	2	2	TTCTTCTGCCAGCCTGAGGGCTGT	6	+	166	4584
ENSDARG00000003495	ENSDART00000100151	7	2	2	ACAGACACCTCAGCTGTTGCGGCG	6	+	93	4584
ENSDARG00000003495	ENSDART00000100151	7	3	3	TTCGGCGCCCCCTGCAGGAGATGGG	7	+	435	4584
ENSDARG00000003495	ENSDART00000100151	7	3	3	GCCCCCTGCAGGAGATGGGACTTT	6	+	441	4584
ENSDARG00000003495	ENSDART00000100151	7	3	3	TGCTCATACAGACACTGCAGTGGAG	7	+	363	4584
ENSDARG00000003495	ENSDART00000100151	7	3	3	TCCTCAAGCGCATGGTGGACTGC	5	+	614	4584
ENSDARG00000003495	ENSDART00000100151	7	3	3	ACATTCGGCGCCCCCTGCAGGAGAT	7	+	432	4584
ENSDARG00000003495	ENSDART00000100151	7	4	4	TCCCGCTTCAGCATCGTAGACTTC	6	+	895	4584
ENSDARG00000003495	ENSDART00000100151	7	4	4	TCCTGCCCCATGAGCTGCAGCCTGC	7	+	845	4584
ENSDARG00000003495	ENSDART00000100151	7	4	4	GTCAGCGGCGTGTGGATGTGGAGGT	7	+	821	4584
ENSDARG00000003495	ENSDART00000100151	7	4	4	GTCAGCGGCGTGTGGATGTGGAG	5	+	821	4584
ENSDARG00000003495	ENSDART00000100151	7	4	4	GGCTGCTGCGCTCACCGGTGCCTGT	7	+	791	4584
ENSDARG00000003495	ENSDART00000100151	7	4	4	CGCTCCACCTGCCACTGGAGCTGCT	7	+	920	4584
ENSDARG00000003495	ENSDART00000100151	7	4	4	TCCACCTGCCACTGGAGCTGCTGGG	7	+	923	4584
ENSDARG00000003495	ENSDART00000100151	7	4	4	ACCTGCCACTGGAGCTGCTGGGAG	6	+	926	4584
ENSDARG00000003495	ENSDART00000100151	7	5	5	CCCACCTGCATGGCCTCTGCAGAA	6	+	1102	4584
ENSDARG00000003495	ENSDART00000100151	7	8	8	AGCCTATTCTGAACCTGGAGAAGTT	7	+	1352	4584
ENSDARG00000003495	ENSDART00000100151	7	8	8	CTCATCTACGGCAATGATGTGGAC	6	+	1453	4584
ENSDARG00000003495	ENSDART00000100151	7	9	9	TCCCTCGTCCTGTGGTGGCCTTT	5	+	1574	4584
ENSDARG00000003495	ENSDART00000100151	7	9	9	CTCCCACACTCAGGCAGTGGAGTAC	7	+	1653	4584
ENSDARG00000003495	ENSDART00000100151	7	9	9	CTCTCCCACACTCAGGCAGTGGAG	6	+	1651	4584
ENSDARG00000003495	ENSDART00000100151	7	10	10	TTCTACCGCGTGTATGATGGAAAC	6	+	1798	4584
ENSDARG00000003495	ENSDART00000100151	7	11	11	CTCCTACTCATCTCTTGGAGATTTT	7	+	1929	4584
ENSDARG00000003495	ENSDART00000100151	7	11	11	CTACTCATCTCTTGGAGATTTTGTG	7	+	1932	4584
ENSDARG00000003495	ENSDART00000100151	7	12	12	GACCCATGCTGCACTGGGAGATGCA	7	+	2010	4584
ENSDARG00000003495	ENSDART00000100151	7	12	12	GAAGGCCCCACAGAAGCAGCGGAC	6	+	2095	4584
ENSDARG00000003495	ENSDART00000100151	7	13	13	CCCTACAGAGGAAGATGCTGAGAC	6	+	2298	4584
ENSDARG00000003495	ENSDART00000100151	7	16	16	TTAAGCACAGCCCTACTGTGAAGAG	7	+	2663	4584
ENSDARG00000003495	ENSDART00000100151	7	19	19	AGCCCCACCGAAGGGCTTAGCAGTC	7	+	3085	4584
ENSDARG00000003495	ENSDART00000100151	7	19	19	GAAATCATCACGCCAGTTTGATAC	6	+	3207	4584
ENSDARG00000003495	ENSDART00000100151	7	22	22	CCCTGCAACCAGCTCAGTGTTTGTG	7	+	3543	4584
ENSDARG00000003495	ENSDART00000100151	7	23	23	ACCTGCTCCACCCGTTGAGGATGTT	7	+	3624	4584
ENSDARG00000003495	ENSDART00000100151	7	23	23	AGCACCTGCTCCACCCGTTGAGGAT	7	+	3621	4584
ENSDARG00000003495	ENSDART00000100151	7	27	27	TTAAAAAACAGACATTTGTTGTG	5	+	4064	4584
ENSDARG00000003495	ENSDART00000100151	7	27	27	CTATCAGGCCGAGTGGCAGCAGGC	6	+	4037	4584
ENSDARG00000003495	ENSDART00000100151	7	27	27	AAAAACAGACATTTGTTGTGCATGC	7	+	4067	4584
ENSDARG00000003495	ENSDART00000100151	7	28	28	AGAAACGGCCAGGAGACGCAGCT	5	+	4249	4584
ENSDARG00000003495	ENSDART00000100151	7	28	28	TCCCAAAACTAAAGTGTTGTGTCT	6	+	4218	4584
ENSDARG00000003495	ENSDART00000100151	7	28	28	CAAAACTAAAGTGTTGTGTCTGT	5	+	4221	4584
ENSDARG00000003495	ENSDART00000100151	7	28	28	GTCCCAAAACTAAAGTGTTGTGTCT	7	+	4217	4584
ENSDARG00000003495	ENSDART00000100151	7	28	28	GTCCCAAAACTAAAGTGTTGTGT	5	+	4217	4584
ENSDARG00000003495	ENSDART00000100151	7	29	29	GTTCTCTCCTTCCCATGTGCAGGT	6	+	4309	4584
ENSDARG00000003495	ENSDART00000100151	7	32	32	CTCTTCTCCTACATGGCGGCGGT	5	+	4513	4584
ENSDARG00000003495	ENSDART00000100151	7	32	32	CTCTTCTCCTACATGGCGGCGGTC	6	+	4513	4584
ENSDARG00000003495	ENSDART00000100154	7	2	2	GTCTTCTTCTGCCAGCCTGAGGG	5	+	163	4608
ENSDARG00000003495	ENSDART00000100154	7	2	2	TTCTTCTGCCAGCCTGAGGGCTGT	6	+	166	4608
ENSDARG00000003495	ENSDART00000100154	7	2	2	CTCTGCCACCTGATGTGGTCTTC	5	+	146	4608
ENSDARG00000003495	ENSDART00000100154	7	2	2	TTCCTCTGCCACCTGATGTGGTC	5	+	143	4608
ENSDARG00000003495	ENSDART00000100154	7	2	2	AGACACCTCAGCTGTTGCGGCGTT	6	+	95	4608
ENSDARG00000003495	ENSDART00000100154	7	2	2	ACAGACACCTCAGCTGTTGCGGCG	6	+	93	4608
ENSDARG00000003495	ENSDART00000100154	7	2	2	ACCATCGCCCAAGAGCTGAAGGA	5	+	320	4608
ENSDARG00000003495	ENSDART00000100154	7	3	3	TGCTCATACAGACACTGCAGTGGAG	7	+	354	4608
ENSDARG00000003495	ENSDART00000100154	7	4	4	TCCTCAAGCGCATGGTGGACTGC	5	+	560	4608
ENSDARG00000003495	ENSDART00000100154	7	5	5	TCCACCTGCCACTGGAGCTGCTGGG	7	+	869	4608
ENSDARG00000003495	ENSDART00000100154	7	5	5	GTCAGCGGCGTGTGGATGTGGAG	5	+	767	4608
ENSDARG00000003495	ENSDART00000100154	7	5	5	GGCTGCTGCGCTCACCGGTGCCTGT	7	+	737	4608
ENSDARG00000003495	ENSDART00000100154	7	5	5	GTCAGCGGCGTGTGGATGTGGAGGT	7	+	767	4608
ENSDARG00000003495	ENSDART00000100154	7	5	5	TCCCGCTTCAGCATCGTAGACTTC	6	+	841	4608
ENSDARG00000003495	ENSDART00000100154	7	5	5	CGCTCCACCTGCCACTGGAGCTGCT	7	+	866	4608
ENSDARG00000003495	ENSDART00000100154	7	5	5	TCCTGCCCCATGAGCTGCAGCCTGC	7	+	791	4608
ENSDARG00000003495	ENSDART00000100154	7	5	5	ACCTGCCACTGGAGCTGCTGGGAG	6	+	872	4608
ENSDARG00000003495	ENSDART00000100154	7	6	6	CCCACCTGCATGGCCTCTGCAGAA	6	+	1048	4608
ENSDARG00000003495	ENSDART00000100154	7	10	10	AGCCTATTCTGAACCTGGAGAAGTT	7	+	1355	4608
ENSDARG00000003495	ENSDART00000100154	7	10	10	CTCATCTACGGCAATGATGTGGAC	6	+	1456	4608
ENSDARG00000003495	ENSDART00000100154	7	11	11	CTCTCCCACACTCAGGCAGTGGAG	6	+	1654	4608
ENSDARG00000003495	ENSDART00000100154	7	11	11	CTCCCACACTCAGGCAGTGGAGTAC	7	+	1656	4608
ENSDARG00000003495	ENSDART00000100154	7	11	11	TCCCTCGTCCTGTGGTGGCCTTT	5	+	1577	4608
ENSDARG00000003495	ENSDART00000100154	7	12	12	TTCTACCGCGTGTATGATGGAAAC	6	+	1801	4608
ENSDARG00000003495	ENSDART00000100154	7	13	13	CTCCTACTCATCTCTTGGAGATTTT	7	+	1932	4608
ENSDARG00000003495	ENSDART00000100154	7	13	13	CTACTCATCTCTTGGAGATTTTGTG	7	+	1935	4608
ENSDARG00000003495	ENSDART00000100154	7	14	14	GAAGGCCCCACAGAAGCAGCGGAC	6	+	2098	4608
ENSDARG00000003495	ENSDART00000100154	7	14	14	GACCCATGCTGCACTGGGAGATGCA	7	+	2013	4608
ENSDARG00000003495	ENSDART00000100154	7	15	15	CCCTACAGAGGAAGATGCTGAGAC	6	+	2370	4608
ENSDARG00000003495	ENSDART00000100154	7	18	18	TTAAGCACAGCCCTACTGTGAAGAG	7	+	2735	4608
ENSDARG00000003495	ENSDART00000100154	7	23	23	CCCTGCAACCAGCTCAGTGTTTGTG	7	+	3459	4608
ENSDARG00000003495	ENSDART00000100154	7	24	24	ACCTGCTCCACCCGTTGAGGATGTT	7	+	3540	4608
ENSDARG00000003495	ENSDART00000100154	7	24	24	AGCACCTGCTCCACCCGTTGAGGAT	7	+	3537	4608
ENSDARG00000003495	ENSDART00000100154	7	28	28	AAAAACAGACATTTGTTGTGCATGC	7	+	3983	4608
ENSDARG00000003495	ENSDART00000100154	7	28	28	TTAAAAAACAGACATTTGTTGTG	5	+	3980	4608
ENSDARG00000003495	ENSDART00000100154	7	28	28	CTATCAGGCCGAGTGGCAGCAGGC	6	+	3953	4608
ENSDARG00000003495	ENSDART00000100154	7	29	29	CAAAACTAAAGTGTTGTGTCTGT	5	+	4137	4608
ENSDARG00000003495	ENSDART00000100154	7	29	29	GTCCCAAAACTAAAGTGTTGTGT	5	+	4133	4608
ENSDARG00000003495	ENSDART00000100154	7	29	29	TCCCAAAACTAAAGTGTTGTGTCT	6	+	4134	4608
ENSDARG00000003495	ENSDART00000100154	7	29	29	GTCCCAAAACTAAAGTGTTGTGTCT	7	+	4133	4608
ENSDARG00000003495	ENSDART00000100154	7	29	29	AGAAACGGCCAGGAGACGCAGCT	5	+	4165	4608
ENSDARG00000003495	ENSDART00000100154	7	30	30	GTTAAAGACAGCATGGAGCGTGC	5	+	4231	4608
ENSDARG00000003495	ENSDART00000100154	7	34	34	CTCTTCTCCTACATGGCGGCGGTC	6	+	4537	4608
ENSDARG00000003495	ENSDART00000100154	7	34	34	CTCTTCTCCTACATGGCGGCGGT	5	+	4537	4608
ENSDARG00000003495	ENSDART00000100158	7	2	2	AGACACCTCAGCTGTTGCGGCGTT	6	+	95	4632
ENSDARG00000003495	ENSDART00000100158	7	2	2	TTCCTCTGCCACCTGATGTGGTC	5	+	143	4632
ENSDARG00000003495	ENSDART00000100158	7	2	2	GTCTTCTTCTGCCAGCCTGAGGG	5	+	163	4632
ENSDARG00000003495	ENSDART00000100158	7	2	2	ACCATCGCCCAAGAGCTGAAGGA	5	+	320	4632
ENSDARG00000003495	ENSDART00000100158	7	2	2	CTCTGCCACCTGATGTGGTCTTC	5	+	146	4632
ENSDARG00000003495	ENSDART00000100158	7	2	2	ACAGACACCTCAGCTGTTGCGGCG	6	+	93	4632
ENSDARG00000003495	ENSDART00000100158	7	2	2	TTCTTCTGCCAGCCTGAGGGCTGT	6	+	166	4632
ENSDARG00000003495	ENSDART00000100158	7	3	3	TCCTCAAGCGCATGGTGGACTGC	5	+	614	4632
ENSDARG00000003495	ENSDART00000100158	7	3	3	GCCCCCTGCAGGAGATGGGACTTT	6	+	441	4632
ENSDARG00000003495	ENSDART00000100158	7	3	3	TGCTCATACAGACACTGCAGTGGAG	7	+	363	4632
ENSDARG00000003495	ENSDART00000100158	7	3	3	ACATTCGGCGCCCCCTGCAGGAGAT	7	+	432	4632
ENSDARG00000003495	ENSDART00000100158	7	3	3	TTCGGCGCCCCCTGCAGGAGATGGG	7	+	435	4632
ENSDARG00000003495	ENSDART00000100158	7	4	4	TCCTGCCCCATGAGCTGCAGCCTGC	7	+	845	4632
ENSDARG00000003495	ENSDART00000100158	7	4	4	GGCTGCTGCGCTCACCGGTGCCTGT	7	+	791	4632
ENSDARG00000003495	ENSDART00000100158	7	4	4	GTCAGCGGCGTGTGGATGTGGAG	5	+	821	4632
ENSDARG00000003495	ENSDART00000100158	7	4	4	GTCAGCGGCGTGTGGATGTGGAGGT	7	+	821	4632
ENSDARG00000003495	ENSDART00000100158	7	4	4	ACCTGCCACTGGAGCTGCTGGGAG	6	+	926	4632
ENSDARG00000003495	ENSDART00000100158	7	4	4	TCCACCTGCCACTGGAGCTGCTGGG	7	+	923	4632
ENSDARG00000003495	ENSDART00000100158	7	4	4	TCCCGCTTCAGCATCGTAGACTTC	6	+	895	4632
ENSDARG00000003495	ENSDART00000100158	7	4	4	CGCTCCACCTGCCACTGGAGCTGCT	7	+	920	4632
ENSDARG00000003495	ENSDART00000100158	7	5	5	CCCACCTGCATGGCCTCTGCAGAA	6	+	1102	4632
ENSDARG00000003495	ENSDART00000100158	7	8	8	CTCATCTACGGCAATGATGTGGAC	6	+	1453	4632
ENSDARG00000003495	ENSDART00000100158	7	8	8	AGCCTATTCTGAACCTGGAGAAGTT	7	+	1352	4632
ENSDARG00000003495	ENSDART00000100158	7	9	9	TCCCTCGTCCTGTGGTGGCCTTT	5	+	1574	4632
ENSDARG00000003495	ENSDART00000100158	7	9	9	CTCCCACACTCAGGCAGTGGAGTAC	7	+	1653	4632
ENSDARG00000003495	ENSDART00000100158	7	9	9	CTCTCCCACACTCAGGCAGTGGAG	6	+	1651	4632
ENSDARG00000003495	ENSDART00000100158	7	10	10	TTCTACCGCGTGTATGATGGAAAC	6	+	1798	4632
ENSDARG00000003495	ENSDART00000100158	7	11	11	CTACTCATCTCTTGGAGATTTTGTG	7	+	1932	4632
ENSDARG00000003495	ENSDART00000100158	7	11	11	CTCCTACTCATCTCTTGGAGATTTT	7	+	1929	4632
ENSDARG00000003495	ENSDART00000100158	7	12	12	GACCCATGCTGCACTGGGAGATGCA	7	+	2010	4632
ENSDARG00000003495	ENSDART00000100158	7	12	12	GAAGGCCCCACAGAAGCAGCGGAC	6	+	2095	4632
ENSDARG00000003495	ENSDART00000100158	7	13	13	CCCTACAGAGGAAGATGCTGAGAC	6	+	2298	4632
ENSDARG00000003495	ENSDART00000100158	7	16	16	TTAAGCACAGCCCTACTGTGAAGAG	7	+	2663	4632
ENSDARG00000003495	ENSDART00000100158	7	19	19	GAAATCATCACGCCAGTTTGATAC	6	+	3207	4632
ENSDARG00000003495	ENSDART00000100158	7	19	19	AGCCCCACCGAAGGGCTTAGCAGTC	7	+	3085	4632
ENSDARG00000003495	ENSDART00000100158	7	22	22	CCCTGCAACCAGCTCAGTGTTTGTG	7	+	3591	4632
ENSDARG00000003495	ENSDART00000100158	7	23	23	ACCTGCTCCACCCGTTGAGGATGTT	7	+	3672	4632
ENSDARG00000003495	ENSDART00000100158	7	23	23	AGCACCTGCTCCACCCGTTGAGGAT	7	+	3669	4632
ENSDARG00000003495	ENSDART00000100158	7	27	27	CTATCAGGCCGAGTGGCAGCAGGC	6	+	4085	4632
ENSDARG00000003495	ENSDART00000100158	7	27	27	AAAAACAGACATTTGTTGTGCATGC	7	+	4115	4632
ENSDARG00000003495	ENSDART00000100158	7	27	27	TTAAAAAACAGACATTTGTTGTG	5	+	4112	4632
ENSDARG00000003495	ENSDART00000100158	7	28	28	AGAAACGGCCAGGAGACGCAGCT	5	+	4297	4632
ENSDARG00000003495	ENSDART00000100158	7	28	28	GTCCCAAAACTAAAGTGTTGTGT	5	+	4265	4632
ENSDARG00000003495	ENSDART00000100158	7	28	28	CAAAACTAAAGTGTTGTGTCTGT	5	+	4269	4632
ENSDARG00000003495	ENSDART00000100158	7	28	28	GTCCCAAAACTAAAGTGTTGTGTCT	7	+	4265	4632
ENSDARG00000003495	ENSDART00000100158	7	28	28	TCCCAAAACTAAAGTGTTGTGTCT	6	+	4266	4632
ENSDARG00000003495	ENSDART00000100158	7	29	29	GTTCTCTCCTTCCCATGTGCAGGT	6	+	4357	4632
ENSDARG00000003495	ENSDART00000100158	7	32	32	CTCTTCTCCTACATGGCGGCGGTC	6	+	4561	4632
ENSDARG00000003495	ENSDART00000100158	7	32	32	CTCTTCTCCTACATGGCGGCGGT	5	+	4561	4632
ENSDARG00000003495	ENSDART00000100161	7	2	2	GTCTTCTTCTGCCAGCCTGAGGG	5	+	163	4860
ENSDARG00000003495	ENSDART00000100161	7	2	2	CTCTGCCACCTGATGTGGTCTTC	5	+	146	4860
ENSDARG00000003495	ENSDART00000100161	7	2	2	TTCCTCTGCCACCTGATGTGGTC	5	+	143	4860
ENSDARG00000003495	ENSDART00000100161	7	2	2	AGACACCTCAGCTGTTGCGGCGTT	6	+	95	4860
ENSDARG00000003495	ENSDART00000100161	7	2	2	ACAGACACCTCAGCTGTTGCGGCG	6	+	93	4860
ENSDARG00000003495	ENSDART00000100161	7	2	2	ACCATCGCCCAAGAGCTGAAGGA	5	+	320	4860
ENSDARG00000003495	ENSDART00000100161	7	2	2	TTCTTCTGCCAGCCTGAGGGCTGT	6	+	166	4860
ENSDARG00000003495	ENSDART00000100161	7	3	3	GCCCCCTGCAGGAGATGGGACTTT	6	+	441	4860
ENSDARG00000003495	ENSDART00000100161	7	3	3	TTCGGCGCCCCCTGCAGGAGATGGG	7	+	435	4860
ENSDARG00000003495	ENSDART00000100161	7	3	3	ACATTCGGCGCCCCCTGCAGGAGAT	7	+	432	4860
ENSDARG00000003495	ENSDART00000100161	7	3	3	TGCTCATACAGACACTGCAGTGGAG	7	+	363	4860
ENSDARG00000003495	ENSDART00000100161	7	3	3	TCCTCAAGCGCATGGTGGACTGC	5	+	614	4860
ENSDARG00000003495	ENSDART00000100161	7	4	4	GTCAGCGGCGTGTGGATGTGGAGGT	7	+	821	4860
ENSDARG00000003495	ENSDART00000100161	7	4	4	ACCTGCCACTGGAGCTGCTGGGAG	6	+	926	4860
ENSDARG00000003495	ENSDART00000100161	7	4	4	GGCTGCTGCGCTCACCGGTGCCTGT	7	+	791	4860
ENSDARG00000003495	ENSDART00000100161	7	4	4	TCCCGCTTCAGCATCGTAGACTTC	6	+	895	4860
ENSDARG00000003495	ENSDART00000100161	7	4	4	TCCACCTGCCACTGGAGCTGCTGGG	7	+	923	4860
ENSDARG00000003495	ENSDART00000100161	7	4	4	CGCTCCACCTGCCACTGGAGCTGCT	7	+	920	4860
ENSDARG00000003495	ENSDART00000100161	7	4	4	GTCAGCGGCGTGTGGATGTGGAG	5	+	821	4860
ENSDARG00000003495	ENSDART00000100161	7	4	4	TCCTGCCCCATGAGCTGCAGCCTGC	7	+	845	4860
ENSDARG00000003495	ENSDART00000100161	7	5	5	CCCACCTGCATGGCCTCTGCAGAA	6	+	1102	4860
ENSDARG00000003495	ENSDART00000100161	7	8	8	CTCATCTACGGCAATGATGTGGAC	6	+	1453	4860
ENSDARG00000003495	ENSDART00000100161	7	8	8	AGCCTATTCTGAACCTGGAGAAGTT	7	+	1352	4860
ENSDARG00000003495	ENSDART00000100161	7	9	9	CTCTCCCACACTCAGGCAGTGGAG	6	+	1651	4860
ENSDARG00000003495	ENSDART00000100161	7	9	9	TCCCTCGTCCTGTGGTGGCCTTT	5	+	1574	4860
ENSDARG00000003495	ENSDART00000100161	7	9	9	CTCCCACACTCAGGCAGTGGAGTAC	7	+	1653	4860
ENSDARG00000003495	ENSDART00000100161	7	10	10	TTCTACCGCGTGTATGATGGAAAC	6	+	1798	4860
ENSDARG00000003495	ENSDART00000100161	7	11	11	CTCCTACTCATCTCTTGGAGATTTT	7	+	1929	4860
ENSDARG00000003495	ENSDART00000100161	7	11	11	CTACTCATCTCTTGGAGATTTTGTG	7	+	1932	4860
ENSDARG00000003495	ENSDART00000100161	7	12	12	GACCCATGCTGCACTGGGAGATGCA	7	+	2010	4860
ENSDARG00000003495	ENSDART00000100161	7	12	12	GAAGGCCCCACAGAAGCAGCGGAC	6	+	2095	4860
ENSDARG00000003495	ENSDART00000100161	7	13	13	CCCTACAGAGGAAGATGCTGAGAC	6	+	2367	4860
ENSDARG00000003495	ENSDART00000100161	7	16	16	TTAAGCACAGCCCTACTGTGAAGAG	7	+	2732	4860
ENSDARG00000003495	ENSDART00000100161	7	19	19	GAAATCATCACGCCAGTTTGATAC	6	+	3276	4860
ENSDARG00000003495	ENSDART00000100161	7	19	19	AGCCCCACCGAAGGGCTTAGCAGTC	7	+	3154	4860
ENSDARG00000003495	ENSDART00000100161	7	22	22	CCCTGCAACCAGCTCAGTGTTTGTG	7	+	3648	4860
ENSDARG00000003495	ENSDART00000100161	7	23	23	ACCTGCTCCACCCGTTGAGGATGTT	7	+	3729	4860
ENSDARG00000003495	ENSDART00000100161	7	23	23	AGCACCTGCTCCACCCGTTGAGGAT	7	+	3726	4860
ENSDARG00000003495	ENSDART00000100161	7	28	28	CTATCAGGCCGAGTGGCAGCAGGC	6	+	4205	4860
ENSDARG00000003495	ENSDART00000100161	7	28	28	AAAAACAGACATTTGTTGTGCATGC	7	+	4235	4860
ENSDARG00000003495	ENSDART00000100161	7	28	28	TTAAAAAACAGACATTTGTTGTG	5	+	4232	4860
ENSDARG00000003495	ENSDART00000100161	7	29	29	CAAAACTAAAGTGTTGTGTCTGT	5	+	4389	4860
ENSDARG00000003495	ENSDART00000100161	7	29	29	GTCCCAAAACTAAAGTGTTGTGT	5	+	4385	4860
ENSDARG00000003495	ENSDART00000100161	7	29	29	GTCCCAAAACTAAAGTGTTGTGTCT	7	+	4385	4860
ENSDARG00000003495	ENSDART00000100161	7	29	29	AGAAACGGCCAGGAGACGCAGCT	5	+	4417	4860
ENSDARG00000003495	ENSDART00000100161	7	29	29	TCCCAAAACTAAAGTGTTGTGTCT	6	+	4386	4860
ENSDARG00000003495	ENSDART00000100161	7	30	30	GTTAAAGACAGCATGGAGCGTGC	5	+	4483	4860
ENSDARG00000003495	ENSDART00000100161	7	34	34	CTCTTCTCCTACATGGCGGCGGTC	6	+	4789	4860
ENSDARG00000003495	ENSDART00000100161	7	34	34	CTCTTCTCCTACATGGCGGCGGT	5	+	4789	4860
ENSDARG00000003495	ENSDART00000100164	7	2	2	CTCTGCCACCTGATGTGGTCTTC	5	+	149	4482
ENSDARG00000003495	ENSDART00000100164	7	2	2	AGACACCTCAGCTGTTGCGGCGTT	6	+	98	4482
ENSDARG00000003495	ENSDART00000100164	7	2	2	TTCTTCTGCCAGCCTGAGGGCTGT	6	+	169	4482
ENSDARG00000003495	ENSDART00000100164	7	2	2	TTCCTCTGCCACCTGATGTGGTC	5	+	146	4482
ENSDARG00000003495	ENSDART00000100164	7	2	2	ACCATCGCCCAAGAGCTGAAGGA	5	+	323	4482
ENSDARG00000003495	ENSDART00000100164	7	2	2	GTCTTCTTCTGCCAGCCTGAGGG	5	+	166	4482
ENSDARG00000003495	ENSDART00000100164	7	2	2	ACAGACACCTCAGCTGTTGCGGCG	6	+	96	4482
ENSDARG00000003495	ENSDART00000100164	7	3	3	TTCGGCGCCCCCTGCAGGAGATGGG	7	+	438	4482
ENSDARG00000003495	ENSDART00000100164	7	3	3	GCCCCCTGCAGGAGATGGGACTTT	6	+	444	4482
ENSDARG00000003495	ENSDART00000100164	7	3	3	TCCTCAAGCGCATGGTGGACTGC	5	+	617	4482
ENSDARG00000003495	ENSDART00000100164	7	3	3	TGCTCATACAGACACTGCAGTGGAG	7	+	366	4482
ENSDARG00000003495	ENSDART00000100164	7	3	3	ACATTCGGCGCCCCCTGCAGGAGAT	7	+	435	4482
ENSDARG00000003495	ENSDART00000100164	7	4	4	ACCTGCCACTGGAGCTGCTGGGAG	6	+	929	4482
ENSDARG00000003495	ENSDART00000100164	7	4	4	GTCAGCGGCGTGTGGATGTGGAGGT	7	+	824	4482
ENSDARG00000003495	ENSDART00000100164	7	4	4	GTCAGCGGCGTGTGGATGTGGAG	5	+	824	4482
ENSDARG00000003495	ENSDART00000100164	7	4	4	GGCTGCTGCGCTCACCGGTGCCTGT	7	+	794	4482
ENSDARG00000003495	ENSDART00000100164	7	4	4	TCCACCTGCCACTGGAGCTGCTGGG	7	+	926	4482
ENSDARG00000003495	ENSDART00000100164	7	4	4	TCCCGCTTCAGCATCGTAGACTTC	6	+	898	4482
ENSDARG00000003495	ENSDART00000100164	7	4	4	TCCTGCCCCATGAGCTGCAGCCTGC	7	+	848	4482
ENSDARG00000003495	ENSDART00000100164	7	4	4	CGCTCCACCTGCCACTGGAGCTGCT	7	+	923	4482
ENSDARG00000003495	ENSDART00000100164	7	5	5	CCCACCTGCATGGCCTCTGCAGAA	6	+	1105	4482
ENSDARG00000003495	ENSDART00000100164	7	8	8	AGCCTATTCTGAACCTGGAGAAGTT	7	+	1355	4482
ENSDARG00000003495	ENSDART00000100164	7	8	8	CTCATCTACGGCAATGATGTGGAC	6	+	1456	4482
ENSDARG00000003495	ENSDART00000100164	7	9	9	CTCTCCCACACTCAGGCAGTGGAG	6	+	1654	4482
ENSDARG00000003495	ENSDART00000100164	7	9	9	TCCCTCGTCCTGTGGTGGCCTTT	5	+	1577	4482
ENSDARG00000003495	ENSDART00000100164	7	9	9	CTCCCACACTCAGGCAGTGGAGTAC	7	+	1656	4482
ENSDARG00000003495	ENSDART00000100164	7	10	10	TTCTACCGCGTGTATGATGGAAAC	6	+	1801	4482
ENSDARG00000003495	ENSDART00000100164	7	11	11	CTACTCATCTCTTGGAGATTTTGTG	7	+	1935	4482
ENSDARG00000003495	ENSDART00000100164	7	11	11	CTCCTACTCATCTCTTGGAGATTTT	7	+	1932	4482
ENSDARG00000003495	ENSDART00000100164	7	12	12	GAAGGCCCCACAGAAGCAGCGGAC	6	+	2098	4482
ENSDARG00000003495	ENSDART00000100164	7	12	12	GACCCATGCTGCACTGGGAGATGCA	7	+	2013	4482
ENSDARG00000003495	ENSDART00000100164	7	16	16	TTAAGCACAGCCCTACTGTGAAGAG	7	+	2612	4482
ENSDARG00000003495	ENSDART00000100164	7	19	19	GAAATCATCACGCCAGTTTGATAC	6	+	3156	4482
ENSDARG00000003495	ENSDART00000100164	7	19	19	AGCCCCACCGAAGGGCTTAGCAGTC	7	+	3034	4482
ENSDARG00000003495	ENSDART00000100164	7	22	22	CCCTGCAACCAGCTCAGTGTTTGTG	7	+	3540	4482
ENSDARG00000003495	ENSDART00000100164	7	23	23	ACCTGCTCCACCCGTTGAGGATGTT	7	+	3621	4482
ENSDARG00000003495	ENSDART00000100164	7	23	23	AGCACCTGCTCCACCCGTTGAGGAT	7	+	3618	4482
ENSDARG00000003495	ENSDART00000100164	7	27	27	TTAAAAAACAGACATTTGTTGTG	5	+	4061	4482
ENSDARG00000003495	ENSDART00000100164	7	27	27	CTATCAGGCCGAGTGGCAGCAGGC	6	+	4034	4482
ENSDARG00000003495	ENSDART00000100164	7	27	27	AAAAACAGACATTTGTTGTGCATGC	7	+	4064	4482
ENSDARG00000003495	ENSDART00000100164	7	28	28	TCCCAAAACTAAAGTGTTGTGTCT	6	+	4215	4482
ENSDARG00000003495	ENSDART00000100164	7	28	28	GTCCCAAAACTAAAGTGTTGTGTCT	7	+	4214	4482
ENSDARG00000003495	ENSDART00000100164	7	28	28	GTCCCAAAACTAAAGTGTTGTGT	5	+	4214	4482
ENSDARG00000003495	ENSDART00000100164	7	28	28	CAAAACTAAAGTGTTGTGTCTGT	5	+	4218	4482
ENSDARG00000003495	ENSDART00000100164	7	28	28	AGAAACGGCCAGGAGACGCAGCT	5	+	4246	4482
ENSDARG00000003495	ENSDART00000100164	7	29	29	GTTAAAGACAGCATGGAGCGTGC	5	+	4312	4482
ENSDARG00000003495	ENSDART00000100165	7	2	2	CTCTGCCACCTGATGTGGTCTTC	5	+	149	4872
ENSDARG00000003495	ENSDART00000100165	7	2	2	AGACACCTCAGCTGTTGCGGCGTT	6	+	98	4872
ENSDARG00000003495	ENSDART00000100165	7	2	2	ACCATCGCCCAAGAGCTGAAGGA	5	+	323	4872
ENSDARG00000003495	ENSDART00000100165	7	2	2	GTCTTCTTCTGCCAGCCTGAGGG	5	+	166	4872
ENSDARG00000003495	ENSDART00000100165	7	2	2	ACAGACACCTCAGCTGTTGCGGCG	6	+	96	4872
ENSDARG00000003495	ENSDART00000100165	7	2	2	TTCCTCTGCCACCTGATGTGGTC	5	+	146	4872
ENSDARG00000003495	ENSDART00000100165	7	2	2	TTCTTCTGCCAGCCTGAGGGCTGT	6	+	169	4872
ENSDARG00000003495	ENSDART00000100165	7	3	3	GCCCCCTGCAGGAGATGGGACTTT	6	+	444	4872
ENSDARG00000003495	ENSDART00000100165	7	3	3	TCCTCAAGCGCATGGTGGACTGC	5	+	617	4872
ENSDARG00000003495	ENSDART00000100165	7	3	3	TGCTCATACAGACACTGCAGTGGAG	7	+	366	4872
ENSDARG00000003495	ENSDART00000100165	7	3	3	TTCGGCGCCCCCTGCAGGAGATGGG	7	+	438	4872
ENSDARG00000003495	ENSDART00000100165	7	3	3	ACATTCGGCGCCCCCTGCAGGAGAT	7	+	435	4872
ENSDARG00000003495	ENSDART00000100165	7	4	4	GTCAGCGGCGTGTGGATGTGGAGGT	7	+	824	4872
ENSDARG00000003495	ENSDART00000100165	7	4	4	GGCTGCTGCGCTCACCGGTGCCTGT	7	+	794	4872
ENSDARG00000003495	ENSDART00000100165	7	4	4	TCCTGCCCCATGAGCTGCAGCCTGC	7	+	848	4872
ENSDARG00000003495	ENSDART00000100165	7	4	4	TCCCGCTTCAGCATCGTAGACTTC	6	+	898	4872
ENSDARG00000003495	ENSDART00000100165	7	4	4	TCCACCTGCCACTGGAGCTGCTGGG	7	+	926	4872
ENSDARG00000003495	ENSDART00000100165	7	4	4	GTCAGCGGCGTGTGGATGTGGAG	5	+	824	4872
ENSDARG00000003495	ENSDART00000100165	7	4	4	ACCTGCCACTGGAGCTGCTGGGAG	6	+	929	4872
ENSDARG00000003495	ENSDART00000100165	7	4	4	CGCTCCACCTGCCACTGGAGCTGCT	7	+	923	4872
ENSDARG00000003495	ENSDART00000100165	7	5	5	CCCACCTGCATGGCCTCTGCAGAA	6	+	1105	4872
ENSDARG00000003495	ENSDART00000100165	7	8	8	CTCATCTACGGCAATGATGTGGAC	6	+	1456	4872
ENSDARG00000003495	ENSDART00000100165	7	8	8	AGCCTATTCTGAACCTGGAGAAGTT	7	+	1355	4872
ENSDARG00000003495	ENSDART00000100165	7	9	9	CTCCCACACTCAGGCAGTGGAGTAC	7	+	1656	4872
ENSDARG00000003495	ENSDART00000100165	7	9	9	TCCCTCGTCCTGTGGTGGCCTTT	5	+	1577	4872
ENSDARG00000003495	ENSDART00000100165	7	9	9	CTCTCCCACACTCAGGCAGTGGAG	6	+	1654	4872
ENSDARG00000003495	ENSDART00000100165	7	10	10	TTCTACCGCGTGTATGATGGAAAC	6	+	1801	4872
ENSDARG00000003495	ENSDART00000100165	7	11	11	CTCCTACTCATCTCTTGGAGATTTT	7	+	1932	4872
ENSDARG00000003495	ENSDART00000100165	7	11	11	CTACTCATCTCTTGGAGATTTTGTG	7	+	1935	4872
ENSDARG00000003495	ENSDART00000100165	7	12	12	GACCCATGCTGCACTGGGAGATGCA	7	+	2013	4872
ENSDARG00000003495	ENSDART00000100165	7	12	12	GAAGGCCCCACAGAAGCAGCGGAC	6	+	2098	4872
ENSDARG00000003495	ENSDART00000100165	7	13	13	CCCTACAGAGGAAGATGCTGAGAC	6	+	2370	4872
ENSDARG00000003495	ENSDART00000100165	7	17	17	TTAAGCACAGCCCTACTGTGAAGAG	7	+	2795	4872
ENSDARG00000003495	ENSDART00000100165	7	20	20	GAAATCATCACGCCAGTTTGATAC	6	+	3339	4872
ENSDARG00000003495	ENSDART00000100165	7	20	20	AGCCCCACCGAAGGGCTTAGCAGTC	7	+	3217	4872
ENSDARG00000003495	ENSDART00000100165	7	23	23	CCCTGCAACCAGCTCAGTGTTTGTG	7	+	3723	4872
ENSDARG00000003495	ENSDART00000100165	7	24	24	ACCTGCTCCACCCGTTGAGGATGTT	7	+	3804	4872
ENSDARG00000003495	ENSDART00000100165	7	24	24	AGCACCTGCTCCACCCGTTGAGGAT	7	+	3801	4872
ENSDARG00000003495	ENSDART00000100165	7	28	28	CTATCAGGCCGAGTGGCAGCAGGC	6	+	4217	4872
ENSDARG00000003495	ENSDART00000100165	7	28	28	AAAAACAGACATTTGTTGTGCATGC	7	+	4247	4872
ENSDARG00000003495	ENSDART00000100165	7	28	28	TTAAAAAACAGACATTTGTTGTG	5	+	4244	4872
ENSDARG00000003495	ENSDART00000100165	7	29	29	TCCCAAAACTAAAGTGTTGTGTCT	6	+	4398	4872
ENSDARG00000003495	ENSDART00000100165	7	29	29	GTCCCAAAACTAAAGTGTTGTGTCT	7	+	4397	4872
ENSDARG00000003495	ENSDART00000100165	7	29	29	GTCCCAAAACTAAAGTGTTGTGT	5	+	4397	4872
ENSDARG00000003495	ENSDART00000100165	7	29	29	AGAAACGGCCAGGAGACGCAGCT	5	+	4429	4872
ENSDARG00000003495	ENSDART00000100165	7	29	29	CAAAACTAAAGTGTTGTGTCTGT	5	+	4401	4872
ENSDARG00000003495	ENSDART00000100165	7	30	30	GTTAAAGACAGCATGGAGCGTGC	5	+	4495	4872
ENSDARG00000003495	ENSDART00000100165	7	34	34	CTCTTCTCCTACATGGCGGCGGT	5	+	4801	4872
ENSDARG00000003495	ENSDART00000100165	7	34	34	CTCTTCTCCTACATGGCGGCGGTC	6	+	4801	4872
ENSDARG00000003520	ENSDART00000040946	7	2	2	GGCTTCTTCCTCAGGTTTTGCAGGA	7	-	138	1236
ENSDARG00000003520	ENSDART00000040946	7	4	4	TTACCCCTCACACTGGGTGGCAGAC	7	-	371	1236
ENSDARG00000003520	ENSDART00000040946	7	5	5	TTCCACAGCAGCTGTTGGGGCTAC	6	-	490	1236
ENSDARG00000003520	ENSDART00000040946	7	5	5	GTTTCCACAGCAGCTGTTGGGGCT	6	-	492	1236
ENSDARG00000003520	ENSDART00000040946	7	5	5	GTTTCCACAGCAGCTGTTGGGGC	5	-	493	1236
ENSDARG00000003553	ENSDART00000006795	7	2	2	ACAGTCATCTTCAGCGTGCGCATGC	7	-	272	591
ENSDARG00000003553	ENSDART00000006795	7	2	2	ACCTGCGCAGCTGCACTTTGTTGGA	7	-	223	591
ENSDARG00000003553	ENSDART00000006795	7	2	2	CTCAAAGGCTACAATGTTTTGCT	5	-	509	591
ENSDARG00000003682	ENSDART00000086005	7	1	1	GACGTCAACTTCCCCGGCGCTGCG	6	+	13	4209
ENSDARG00000003682	ENSDART00000086005	7	1	1	GTCAACTTCCCCGGCGCTGCGTTT	6	+	16	4209
ENSDARG00000003682	ENSDART00000086005	7	1	1	AACTTCCCCGGCGCTGCGTTTGTG	6	+	19	4209
ENSDARG00000003682	ENSDART00000086005	7	1	1	AACTTCCCCGGCGCTGCGTTTGT	5	+	19	4209
ENSDARG00000003682	ENSDART00000086005	7	1	1	CTCAGCTGCCGCAAAGAGTGAGTT	6	+	67	4209
ENSDARG00000003682	ENSDART00000086005	7	3	3	TGCTCATGCAGGTCGTGGAGCTGCT	7	+	443	4209
ENSDARG00000003682	ENSDART00000086005	7	3	3	AGCTGCTAACCTACAGTGTAGGAG	6	+	371	4209
ENSDARG00000003682	ENSDART00000086005	7	4	4	CTCGACAGCTCACAGTCGCTTGC	5	+	1206	4209
ENSDARG00000003682	ENSDART00000086005	7	4	4	CTCGGCAGCCTCGGGGAGCAGGA	5	+	1615	4209
ENSDARG00000003682	ENSDART00000086005	7	4	4	GACGCCGCAAAGTCCGAGTTTGCT	6	+	930	4209
ENSDARG00000003682	ENSDART00000086005	7	4	4	TTCTGCAGAGCGGAGCCGCTTCT	5	+	747	4209
ENSDARG00000003682	ENSDART00000086005	7	4	4	GGCAGCCTCGGGGAGCAGGATAG	5	+	1618	4209
ENSDARG00000003682	ENSDART00000086005	7	4	4	GGCGTCACCGGCGACGCTGTGGCA	6	+	1159	4209
ENSDARG00000003682	ENSDART00000086005	7	4	4	GTCACCGGCGACGCTGTGGCAGAC	6	+	1162	4209
ENSDARG00000003682	ENSDART00000086005	7	4	4	TACTTCCACGCACTGATGGAGGT	5	+	775	4209
ENSDARG00000003682	ENSDART00000086005	7	4	4	TGCCTAACAGTCCTGATGGTTCT	5	+	619	4209
ENSDARG00000003682	ENSDART00000086005	7	4	4	TTCCACGCACTGATGGAGGTTTG	5	+	778	4209
ENSDARG00000003682	ENSDART00000086005	7	4	4	TTCCACGCACTGATGGAGGTTTGC	6	+	778	4209
ENSDARG00000003682	ENSDART00000086005	7	4	4	TTCCGCAACAGGCGGCAGTGGAG	5	+	714	4209
ENSDARG00000003682	ENSDART00000086005	7	4	4	ACCGGCGACGCTGTGGCAGACGCT	6	+	1165	4209
ENSDARG00000003682	ENSDART00000086005	7	4	4	CGCCGCAAAGTCCGAGTTTGCTTTC	7	+	932	4209
ENSDARG00000003682	ENSDART00000086005	7	4	4	CACTTCCGCAACAGGCGGCAGTG	5	+	711	4209
ENSDARG00000003682	ENSDART00000086005	7	4	4	AGACCCAAAGCTGGGGGTTGGTTAG	7	+	674	4209
ENSDARG00000003682	ENSDART00000086005	7	4	4	AGACGCCGCAAAGTCCGAGTTTGCT	7	+	929	4209
ENSDARG00000003682	ENSDART00000086005	7	4	4	ACCCAAAGCTGGGGGTTGGTTAG	5	+	676	4209
ENSDARG00000003682	ENSDART00000086005	7	4	4	AGACCCAAAGCTGGGGGTTGGTT	5	+	674	4209
ENSDARG00000003682	ENSDART00000086005	7	6	6	GAAACCTGCTACACGTGTTTTTC	5	+	2105	4209
ENSDARG00000003682	ENSDART00000086005	7	10	10	GCCTGCATCCACATGAGGTTTAC	5	+	2678	4209
ENSDARG00000003682	ENSDART00000086005	7	11	11	TCCCTCAACAGCACGCTGGAGAG	5	+	2794	4209
ENSDARG00000003682	ENSDART00000086005	7	11	11	ATCGCCACACTTCTGTGCGAGGCC	6	+	2869	4209
ENSDARG00000003682	ENSDART00000086005	7	11	11	AGCTTCTTCCTGCCTTTAGTGGAG	6	+	2815	4209
ENSDARG00000003682	ENSDART00000086005	7	11	11	TGCGTCTGCGCTTTGCTCTGCTGCA	7	+	2768	4209
ENSDARG00000003682	ENSDART00000086005	7	12	12	GAACGCTACCGTGCAGCGGACGGC	6	+	2943	4209
ENSDARG00000003682	ENSDART00000086005	7	12	12	AAATCACTCTCGACCCGCTGGAGAT	7	+	2984	4209
ENSDARG00000003682	ENSDART00000086005	7	13	13	GCCATCGTCTCAGCTGTGTGTGC	5	+	3078	4209
ENSDARG00000003682	ENSDART00000086005	7	13	13	ATCCGCTTCACCGGAGAGGAGGTC	6	+	3139	4209
ENSDARG00000003682	ENSDART00000086005	7	13	13	AACATCCGCTTCACCGGAGAGGAG	6	+	3136	4209
ENSDARG00000003682	ENSDART00000086005	7	14	14	CGCCGCTAACCGCAATAAGGTGAA	6	+	3258	4209
ENSDARG00000003682	ENSDART00000086005	7	15	15	AGCTACATCAAGAAGTTTGAGAG	5	+	3475	4209
ENSDARG00000003682	ENSDART00000086005	7	15	15	GGCATCGCCATCCGGGCCGATGTG	6	+	3352	4209
ENSDARG00000003682	ENSDART00000086005	7	17	17	TCCATCATCCCACTGCAGCTGCT	5	+	3766	4209
ENSDARG00000003682	ENSDART00000086005	7	17	17	ATCATCCCACTGCAGCTGCTGAC	5	+	3769	4209
ENSDARG00000003682	ENSDART00000086005	7	17	17	AGCTGCGTCTGCGGGAGCTGCAGAA	7	+	3704	4209
ENSDARG00000003682	ENSDART00000086005	7	17	17	AGCTGCGCACCTGCGGTCTGCCGGA	7	+	3815	4209
ENSDARG00000003682	ENSDART00000086005	7	17	17	TGCGTCTGCGGGAGCTGCAGAATGT	7	+	3707	4209
ENSDARG00000003682	ENSDART00000086005	7	18	18	TTCGCCTGCAACCAGGAGAGGAT	5	+	3970	4209
ENSDARG00000003682	ENSDART00000086005	7	19	19	GTATTCCTCCCTGGATGTGATGCT	6	+	4146	4209
ENSDARG00000003769	ENSDART00000004365	7	1	1	GCCATCGTCTGTGGTTGCCGATTTC	7	-	196	1524
ENSDARG00000003769	ENSDART00000004365	7	2	2	CTCTTCAAACTCACGTTGTGGCA	5	-	980	1524
ENSDARG00000003769	ENSDART00000004365	7	2	2	TCCTTCTCCTCCTTGGTGATTTT	5	-	922	1524
ENSDARG00000003846	ENSDART00000053600	7	4	4	ACACTCTGCGTCAAGGTGGTTTT	5	-	368	624
ENSDARG00000003846	ENSDART00000053600	7	4	4	ACACTCTGCGTCAAGGTGGTTTTC	6	-	367	624
ENSDARG00000003846	ENSDART00000053600	7	6	6	TGCACCATCGGCCAGGATTGGGTT	6	-	507	624
ENSDARG00000003846	ENSDART00000053600	7	6	6	TGCACCATCGGCCAGGATTGGGT	5	-	508	624
ENSDARG00000003846	ENSDART00000053600	7	6	6	ACCATCGGCCAGGATTGGGTTTTCT	7	-	503	624
ENSDARG00000003846	ENSDART00000053600	7	6	6	ACCATCGGCCAGGATTGGGTTTTC	6	-	504	624
ENSDARG00000003846	ENSDART00000053600	7	7	7	TCCTCAAGACGGTCTGTGGTTGAA	6	-	578	624
ENSDARG00000003872	ENSDART00000011324	7	2	1	CTCTGCTTCTCTTGGCTGGTTGGAA	7	-	555	1743
ENSDARG00000003872	ENSDART00000011324	7	2	1	GGCGGCCTCGGTCATGTGGGGAC	5	-	26	1743
ENSDARG00000003872	ENSDART00000011324	7	2	1	CTCACCTTCTGCTTGTATAGTTT	5	-	667	1743
ENSDARG00000003872	ENSDART00000011324	7	2	1	TCCTCCAGCTCCCGCAGACGCAGCT	7	-	224	1743
ENSDARG00000003872	ENSDART00000011324	7	2	1	GCCTCCTCCAGCTCCCGCAGACGCA	7	-	227	1743
ENSDARG00000003872	ENSDART00000011324	7	2	1	AGCAACAGAGGAGGGCTGGAGCT	5	-	151	1743
ENSDARG00000003872	ENSDART00000011324	7	3	2	ACCGTCCCACGAGTCTGGAGCCTCT	7	-	723	1743
ENSDARG00000003872	ENSDART00000011324	7	4	3	TTCAGCTCCTCATATTTGAGTTT	5	-	961	1743
ENSDARG00000003872	ENSDART00000011324	7	5	4	TCCTTCAACAGGTTCAGCTGTGGGA	7	-	1004	1743
ENSDARG00000003872	ENSDART00000011324	7	6	5	GACGACCCCACTCTGCTGCATTC	5	-	1149	1743
ENSDARG00000003872	ENSDART00000011324	7	6	5	AGCTCACTCTGGATGGTCTTGAGGT	7	-	1298	1743
ENSDARG00000003872	ENSDART00000011324	7	6	5	CCCGACGACCCCACTCTGCTGCA	5	-	1152	1743
ENSDARG00000003872	ENSDART00000011324	7	7	6	TGCTTCTTCACCTTGGAGTGAAC	5	-	1360	1743
ENSDARG00000003872	ENSDART00000011324	7	7	6	AGCTCCTCCACCCTGAGCCGCAGCT	7	-	1454	1743
ENSDARG00000003872	ENSDART00000011324	7	7	6	TCCTCCACCCTGAGCCGCAGCTTCT	7	-	1451	1743
ENSDARG00000003872	ENSDART00000011324	7	7	6	CTCCTCCACCCTGAGCCGCAGCT	5	-	1454	1743
ENSDARG00000003872	ENSDART00000011324	7	9	8	GGCCAAAACGTGATGAAGCTGAT	5	-	1659	1743
ENSDARG00000004015	ENSDART00000012070	7	3	2	TGCGTCTTCAGTGACTGTAGGAGAG	7	-	186	597
ENSDARG00000004015	ENSDART00000012070	7	5	4	AACCCCGTCCGAGTGACGTTTTG	5	-	383	597
ENSDARG00000004015	ENSDART00000012070	7	6	5	CACACCAAAGTCTACGTCTTGTAG	6	-	508	597
ENSDARG00000004015	ENSDART00000081540	7	2	2	TGCGTCTTCAGTGACTGTAGGAGAG	7	-	186	411
ENSDARG00000004015	ENSDART00000081540	7	3	3	AACCCCGTCCGAGTGACGTTTTG	5	-	278	411
ENSDARG00000004015	ENSDART00000081540	7	3	3	TTCTACAAATAAGCGAGCCGCCGTC	7	-	401	411
ENSDARG00000004042	ENSDART00000017467	7	1	1	AGCTTCCCCTCCGCCCTCTGATGGG	7	+	80	1053
ENSDARG00000004042	ENSDART00000017467	7	1	1	GAAGACCACAAACATTTTAGTGGCC	7	+	216	1053
ENSDARG00000004042	ENSDART00000017467	7	4	4	CCCGACCGCAGTGTGGAGGAGGC	5	+	944	1053
ENSDARG00000004042	ENSDART00000017467	7	4	4	CCCGACCGCAGTGTGGAGGAGGCC	6	+	944	1053
ENSDARG00000004051	ENSDART00000012822	7	2	2	ACATTCCCATGTTTTTTCTGAGTCT	7	-	182	1512
ENSDARG00000004051	ENSDART00000012822	7	2	2	TTAAAAAGCCTAAAGGATTGGAG	5	-	156	1512
ENSDARG00000004051	ENSDART00000012822	7	3	3	TGCCTCAAACATGATGCGGTTGGT	6	-	526	1512
ENSDARG00000004051	ENSDART00000012822	7	3	3	TGCAGCGACGGACCTTGAAGTGTCT	7	-	404	1512
ENSDARG00000004051	ENSDART00000012822	7	3	3	GCCTGCCTCAAACATGATGCGGTT	6	-	529	1512
ENSDARG00000004051	ENSDART00000012822	7	3	3	GCCTCAAACATGATGCGGTTGGT	5	-	526	1512
ENSDARG00000004051	ENSDART00000012822	7	3	3	CACCAAAAAGTCTTGTGTTGCTTTT	7	-	630	1512
ENSDARG00000004051	ENSDART00000012822	7	3	3	AACACCAAAAAGTCTTGTGTTGCT	6	-	633	1512
ENSDARG00000004051	ENSDART00000012822	7	3	3	CAAAAAGTCTTGTGTTGCTTTTGGC	7	-	627	1512
ENSDARG00000004051	ENSDART00000012822	7	3	3	AACTCCTGCAGCCAGTAGAGGGA	5	-	668	1512
ENSDARG00000004051	ENSDART00000012822	7	3	3	ACAGGCTCCAGAAGGCTGCTGGC	5	-	891	1512
ENSDARG00000004051	ENSDART00000012822	7	4	4	CCCAACAGAACCCTGTTGACTTC	5	-	958	1512
ENSDARG00000004051	ENSDART00000012822	7	4	4	GTTGACTTCTGTGCGTGCAGCAGTG	7	-	942	1512
ENSDARG00000004051	ENSDART00000012822	7	4	4	GACCCAACAGAACCCTGTTGACTTC	7	-	958	1512
ENSDARG00000004051	ENSDART00000012822	7	5	5	TACACCTACTGTGGGGTTGGGGT	5	-	1217	1512
ENSDARG00000004051	ENSDART00000012822	7	5	5	TACACCTACTGTGGGGTTGGGGTA	6	-	1216	1512
ENSDARG00000004051	ENSDART00000012822	7	6	6	TTCTCATCCAGAAAGCGGTTGTA	5	-	1240	1512
ENSDARG00000004051	ENSDART00000012822	7	6	6	TTAGTCGTCGGCCAGATTTGAAGAA	7	-	1282	1512
ENSDARG00000004051	ENSDART00000012822	7	6	6	ATCAAAAAATTCCTTAGTCGTCGGC	7	-	1295	1512
ENSDARG00000004051	ENSDART00000012822	7	6	6	GGCATCAAAAAATTCCTTAGTCGTC	7	-	1298	1512
ENSDARG00000004196	ENSDART00000006653	7	1	1	GTAGACAAAGAGCCCCGTGGTGGAC	7	-	162	951
ENSDARG00000004196	ENSDART00000006653	7	3	3	TACTCACCATGTAAAGTCTGTTTAG	7	-	377	951
ENSDARG00000004196	ENSDART00000006653	7	5	5	TGCCCACTCCCTTCAGCAGCTGGA	6	-	773	951
ENSDARG00000004196	ENSDART00000006653	7	5	5	GGCTCACGCTGGACTGGTCGCTGTC	7	-	700	951
ENSDARG00000004196	ENSDART00000006653	7	5	5	GCCCACTCCCTTCAGCAGCTGGA	5	-	773	951
ENSDARG00000004196	ENSDART00000006653	7	5	5	CCCTTCAGCAGCTGGATGGGGTT	5	-	766	951
ENSDARG00000004196	ENSDART00000101445	7	2	2	TACTCACCATGTAAAGTCTGTTTAG	7	-	71	645
ENSDARG00000004196	ENSDART00000101445	7	5	5	TGCCCACTCCCTTCAGCAGCTGGA	6	-	467	645
ENSDARG00000004196	ENSDART00000101445	7	5	5	GGCTCACGCTGGACTGGTCGCTGTC	7	-	394	645
ENSDARG00000004196	ENSDART00000101445	7	5	5	GCCCACTCCCTTCAGCAGCTGGA	5	-	467	645
ENSDARG00000004196	ENSDART00000101445	7	5	5	CCCTTCAGCAGCTGGATGGGGTT	5	-	460	645
ENSDARG00000004196	ENSDART00000101447	7	1	1	GTAGACAAAGAGCCCCGTGGTGGAC	7	-	162	951
ENSDARG00000004196	ENSDART00000101447	7	3	3	TACTCACCATGTAAAGTCTGTTTAG	7	-	377	951
ENSDARG00000004196	ENSDART00000101447	7	6	6	GCCCACTCCCTTCAGCAGCTGGA	5	-	773	951
ENSDARG00000004196	ENSDART00000101447	7	6	6	GGCTCACGCTGGACTGGTCGCTGTC	7	-	700	951
ENSDARG00000004196	ENSDART00000101447	7	6	6	CCCTTCAGCAGCTGGATGGGGTT	5	-	766	951
ENSDARG00000004196	ENSDART00000101447	7	6	6	TGCCCACTCCCTTCAGCAGCTGGA	6	-	773	951
ENSDARG00000004447	ENSDART00000007252	7	2	2	TGCTACGGCTGGCTGGGACGGCTTC	7	+	676	987
ENSDARG00000004447	ENSDART00000007252	7	2	2	GTTAAAATCAACCCTGCTTGGCT	5	+	624	987
ENSDARG00000004447	ENSDART00000007252	7	2	2	GTATGCTACGGCTGGCTGGGACGGC	7	+	673	987
ENSDARG00000004447	ENSDART00000007252	7	2	2	CTCTCCGCAATGGTGGAGCTGGG	5	+	826	987
ENSDARG00000004447	ENSDART00000007252	7	2	2	ATCATCATCACCCTTGTGCTGGC	5	+	763	987
ENSDARG00000004447	ENSDART00000007252	7	2	2	ACACTCTCCGCAATGGTGGAGCT	5	+	823	987
ENSDARG00000004447	ENSDART00000074490	7	3	3	TGCTACGGCTGGCTGGGACGGCTTC	7	+	631	942
ENSDARG00000004447	ENSDART00000074490	7	3	3	GTTAAAATCAACCCTGCTTGGCT	5	+	579	942
ENSDARG00000004447	ENSDART00000074490	7	3	3	GTATGCTACGGCTGGCTGGGACGGC	7	+	628	942
ENSDARG00000004447	ENSDART00000074490	7	3	3	CTCTCCGCAATGGTGGAGCTGGG	5	+	781	942
ENSDARG00000004447	ENSDART00000074490	7	3	3	ATCATCATCACCCTTGTGCTGGC	5	+	718	942
ENSDARG00000004447	ENSDART00000074490	7	3	3	ACACTCTCCGCAATGGTGGAGCT	5	+	778	942
ENSDARG00000004514	ENSDART00000010255	7	1	1	GAATCCTGCTGGTGGTGCATTTTGC	7	-	114	939
ENSDARG00000004514	ENSDART00000010255	7	3	3	AACAACTCCACTTTCTGATGAATAA	7	-	314	939
ENSDARG00000004514	ENSDART00000010255	7	3	3	TCCAACAACTCCACTTTCTGATGAA	7	-	317	939
ENSDARG00000004514	ENSDART00000010255	7	3	3	CAACAACTCCACTTTCTGATGAA	5	-	317	939
ENSDARG00000004514	ENSDART00000010255	7	3	3	CAACTCCACTTTCTGATGAATAA	5	-	314	939
ENSDARG00000004514	ENSDART00000010255	7	4	4	GGCACCAGCAGGACACGCAGCGGTA	7	-	523	939
ENSDARG00000004514	ENSDART00000010255	7	4	4	GGCACCACAGCAGTTGCGTGTGC	5	-	434	939
ENSDARG00000004514	ENSDART00000010255	7	4	4	CACCACAGCAGTTGCGTGTGCAGCA	7	-	430	939
ENSDARG00000004514	ENSDART00000010255	7	4	4	ACATACCTCTTGCAGGCAGCAGGG	6	-	547	939
ENSDARG00000004514	ENSDART00000010255	7	5	5	TACGTCTCCACAGCAGTTGCAGGC	6	-	694	939
ENSDARG00000004514	ENSDART00000010255	7	5	5	TTCATCACAGTCTCCTTGTTGGGTC	7	-	650	939
ENSDARG00000004527	ENSDART00000026846	7	2	2	AGCTGCTGCTTCAGGCAGTGGAG	5	+	48	384
ENSDARG00000004527	ENSDART00000026846	7	4	4	TACCACATCATCATGGTTGAAGGC	6	+	364	384
ENSDARG00000004658	ENSDART00000012637	7	2	2	AGATACTAAAGTCGGGAGCATAG	5	+	138	1182
ENSDARG00000004658	ENSDART00000012637	7	2	2	CACATCTTCCCTGCGCTGGTGGGTC	7	+	97	1182
ENSDARG00000004658	ENSDART00000012637	7	2	2	CACATCTTCCCTGCGCTGGTGGG	5	+	97	1182
ENSDARG00000004658	ENSDART00000012637	7	3	3	TGCCGCTCCATGCTGGAGGTGAC	5	+	199	1182
ENSDARG00000004658	ENSDART00000012637	7	3	3	CCCGACTGCAAGGTGCTGCTGAC	5	+	316	1182
ENSDARG00000004658	ENSDART00000012637	7	3	3	CACACCTTCGGTCCGCAGCGGCT	5	+	280	1182
ENSDARG00000004658	ENSDART00000012637	7	3	3	ACCGGCAGAAGATCGCAGAGGTC	5	+	365	1182
ENSDARG00000004658	ENSDART00000012637	7	5	5	GCCTTCAACCACACGGCGGACTTC	6	+	616	1182
ENSDARG00000004658	ENSDART00000012637	7	6	6	GTTACCAGATGGGCGGATGATAA	5	+	744	1182
ENSDARG00000004658	ENSDART00000012637	7	6	6	AGCCGCACCTCGTTAATGTGGAGGG	7	+	809	1182
ENSDARG00000004658	ENSDART00000012637	7	8	8	CTCTCCAGAGCCGAGTATGAGGA	5	+	1126	1182
ENSDARG00000004713	ENSDART00000028017	7	5	5	TTCACCTTATGAATAGACGTAGTA	6	-	558	606
ENSDARG00000004714	ENSDART00000009938	7	2	2	GCCGACCACTCTTGGAAGCAGCC	5	+	117	2106
ENSDARG00000004714	ENSDART00000009938	7	4	4	AGCTCCAGCATAATGGGTGAGTA	5	+	313	2106
ENSDARG00000004714	ENSDART00000009938	7	8	8	ACCATCTCCCAGCTCAGAGGACTTC	7	+	585	2106
ENSDARG00000004714	ENSDART00000009938	7	8	8	CTCCAAAACCCCCCGGCAGTATGT	6	+	635	2106
ENSDARG00000004714	ENSDART00000009938	7	8	8	TCCAAAACCCCCCGGCAGTATGT	5	+	636	2106
ENSDARG00000004714	ENSDART00000009938	7	9	9	CACTCACACGACCGCCTGGTGAGAA	7	+	799	2106
ENSDARG00000004714	ENSDART00000009938	7	10	10	CTATCCGCCACACTCGGTGTCGCC	6	+	819	2106
ENSDARG00000004714	ENSDART00000009938	7	10	10	CACCACAGAGGGGGTTATGGGTA	5	+	942	2106
ENSDARG00000004714	ENSDART00000009938	7	10	10	AACACCACAGAGGGGGTTATGGGTA	7	+	940	2106
ENSDARG00000004714	ENSDART00000009938	7	12	12	AAACCCCTCCACTCCAGTGGGGTCT	7	+	1071	2106
ENSDARG00000004714	ENSDART00000009938	7	12	12	AACCCCTCCACTCCAGTGGGGTCT	6	+	1072	2106
ENSDARG00000004714	ENSDART00000009938	7	15	15	AGCTCAACCACCAGGCAGACGCC	5	+	1529	2106
ENSDARG00000004714	ENSDART00000009938	7	15	15	CTCAACCACCAGGCAGACGCCTTC	6	+	1531	2106
ENSDARG00000004714	ENSDART00000009938	7	17	17	TTCTCCATCAGGCCGTCGCCGTC	5	+	1925	2106
ENSDARG00000004714	ENSDART00000009938	7	17	17	GCCTTCAAAGAGCTGGGCCGCATGT	7	+	1855	2106
ENSDARG00000004714	ENSDART00000009938	7	18	18	CAAAGCAGCCTGCCTTAAGAGGAG	6	+	1992	2106
ENSDARG00000004714	ENSDART00000009938	7	18	18	GCAGCCTGCCTTAAGAGGAGGGA	5	+	1996	2106
ENSDARG00000004714	ENSDART00000073766	7	3	2	GCCGACCACTCTTGGAAGCAGCC	5	+	117	1011
ENSDARG00000004714	ENSDART00000073766	7	5	4	AGCTCCAGCATAATGGGTGAGTA	5	+	313	1011
ENSDARG00000004714	ENSDART00000073766	7	9	8	ACCATCTCCCAGCTCAGAGGACTTC	7	+	585	1011
ENSDARG00000004714	ENSDART00000073766	7	9	8	TCCAAAACCCCCCGGCAGTATGT	5	+	636	1011
ENSDARG00000004714	ENSDART00000073766	7	9	8	CTCCAAAACCCCCCGGCAGTATGT	6	+	635	1011
ENSDARG00000004714	ENSDART00000073766	7	10	9	CACTCACACGACCGCCTGGTGAGAA	7	+	799	1011
ENSDARG00000004714	ENSDART00000073766	7	11	10	CTATCCGCCACACTCGGTGTCGCC	6	+	819	1011
ENSDARG00000004714	ENSDART00000098728	7	1	1	AACACCACAGAGGGGGTTATGGGTA	7	+	136	1167
ENSDARG00000004714	ENSDART00000098728	7	1	1	CACCACAGAGGGGGTTATGGGTA	5	+	138	1167
ENSDARG00000004714	ENSDART00000098728	7	1	1	CTATCCGCCACACTCGGTGTCGCC	6	+	15	1167
ENSDARG00000004714	ENSDART00000098728	7	3	3	AAACCCCTCCACTCCAGTGGGGTCT	7	+	267	1167
ENSDARG00000004714	ENSDART00000098728	7	3	3	AACCCCTCCACTCCAGTGGGGTCT	6	+	268	1167
ENSDARG00000004714	ENSDART00000098728	7	10	10	TTCTCCATCAGGCCGTCGCCGTC	5	+	1028	1167
ENSDARG00000004714	ENSDART00000098728	7	10	10	GCCTTCAAAGAGCTGGGCCGCATGT	7	+	958	1167
ENSDARG00000004714	ENSDART00000098728	7	11	11	GCAGCCTGCCTTAAGAGGAGGGA	5	+	1099	1167
ENSDARG00000004714	ENSDART00000098728	7	11	11	CAAAGCAGCCTGCCTTAAGAGGAG	6	+	1095	1167
ENSDARG00000004714	ENSDART00000098732	7	1	1	GCCTACCCCGTGCCTGGAATGGGCA	7	+	19	531
ENSDARG00000004714	ENSDART00000098732	7	2	2	ACCATCTCCCAGCTCAGAGGACTTC	7	+	78	531
ENSDARG00000004714	ENSDART00000098732	7	2	2	TCCAAAACCCCCCGGCAGTATGT	5	+	129	531
ENSDARG00000004714	ENSDART00000098732	7	2	2	CTCCAAAACCCCCCGGCAGTATGT	6	+	128	531
ENSDARG00000004714	ENSDART00000098732	7	3	3	CACTCACACGACCGCCTGGTGAGAA	7	+	292	531
ENSDARG00000004714	ENSDART00000098732	7	4	4	CTATCCGCCACACTCGGTGTCGCC	6	+	312	531
ENSDARG00000004714	ENSDART00000098732	7	4	4	AACACCACAGAGGGGGTTATGGGTA	7	+	433	531
ENSDARG00000004714	ENSDART00000098732	7	4	4	CACCACAGAGGGGGTTATGGGTA	5	+	435	531
ENSDARG00000004714	ENSDART00000098733	7	1	1	GCCTACCCCGTGCCTGGAATGGGCA	7	+	19	1599
ENSDARG00000004714	ENSDART00000098733	7	2	2	CTCCAAAACCCCCCGGCAGTATGT	6	+	128	1599
ENSDARG00000004714	ENSDART00000098733	7	2	2	TCCAAAACCCCCCGGCAGTATGT	5	+	129	1599
ENSDARG00000004714	ENSDART00000098733	7	2	2	ACCATCTCCCAGCTCAGAGGACTTC	7	+	78	1599
ENSDARG00000004714	ENSDART00000098733	7	3	3	CACTCACACGACCGCCTGGTGAGAA	7	+	292	1599
ENSDARG00000004714	ENSDART00000098733	7	4	4	CTATCCGCCACACTCGGTGTCGCC	6	+	312	1599
ENSDARG00000004714	ENSDART00000098733	7	4	4	CACCACAGAGGGGGTTATGGGTA	5	+	435	1599
ENSDARG00000004714	ENSDART00000098733	7	4	4	AACACCACAGAGGGGGTTATGGGTA	7	+	433	1599
ENSDARG00000004714	ENSDART00000098733	7	6	6	AACCCCTCCACTCCAGTGGGGTCT	6	+	565	1599
ENSDARG00000004714	ENSDART00000098733	7	6	6	AAACCCCTCCACTCCAGTGGGGTCT	7	+	564	1599
ENSDARG00000004714	ENSDART00000098733	7	9	9	AGCTCAACCACCAGGCAGACGCC	5	+	1022	1599
ENSDARG00000004714	ENSDART00000098733	7	9	9	CTCAACCACCAGGCAGACGCCTTC	6	+	1024	1599
ENSDARG00000004714	ENSDART00000098733	7	11	11	TTCTCCATCAGGCCGTCGCCGTC	5	+	1418	1599
ENSDARG00000004714	ENSDART00000098733	7	11	11	GCCTTCAAAGAGCTGGGCCGCATGT	7	+	1348	1599
ENSDARG00000004714	ENSDART00000098733	7	12	12	GCAGCCTGCCTTAAGAGGAGGGA	5	+	1489	1599
ENSDARG00000004714	ENSDART00000098733	7	12	12	CAAAGCAGCCTGCCTTAAGAGGAG	6	+	1485	1599
ENSDARG00000004714	ENSDART00000098735	7	2	2	GCCGACCACTCTTGGAAGCAGCC	5	+	117	162
ENSDARG00000004874	ENSDART00000008421	7	1	1	AGCTCCACCTGAGGGCGGTGAGGGA	7	+	41	1014
ENSDARG00000004874	ENSDART00000008421	7	2	2	ATCCGCTTCGAAAAGGTGGAGGG	5	+	181	1014
ENSDARG00000004874	ENSDART00000008421	7	8	8	GAAAGCCCAGATTTAGAAGTCTGT	6	+	647	1014
ENSDARG00000005033	ENSDART00000030273	7	2	2	GCAAACATCTGATGGTCTGGGGGG	6	+	216	1659
ENSDARG00000005033	ENSDART00000030273	7	2	2	GCAAACATCTGATGGTCTGGGGG	5	+	216	1659
ENSDARG00000005033	ENSDART00000030273	7	4	4	AGACTCATCAACAACTGTCTGAGCT	7	+	529	1659
ENSDARG00000005033	ENSDART00000030273	7	4	4	ATCAACAACTGTCTGAGCTGCGGAC	7	+	535	1659
ENSDARG00000005033	ENSDART00000030273	7	5	5	CTCCGCAAAAAACTGATGGGAGGTA	7	+	670	1659
ENSDARG00000005033	ENSDART00000030273	7	7	7	CGCAAAATCACGCTAGACTTTGCA	6	+	940	1659
ENSDARG00000005033	ENSDART00000030273	7	7	7	AAATCACGCTAGACTTTGCAGGT	5	+	944	1659
ENSDARG00000005033	ENSDART00000030273	7	8	8	GCCATCAACACTGGTTCTTTTGGC	6	+	1033	1659
ENSDARG00000005033	ENSDART00000030273	7	10	10	GTATACATCCCATAGGGGGCGCC	5	+	1344	1659
ENSDARG00000005033	ENSDART00000030273	7	10	10	TACATCCCATAGGGGGCGCCTGT	5	+	1347	1659
ENSDARG00000005033	ENSDART00000030273	7	10	10	TCCTCAAGAAATTGCAGAGGTAGAG	7	+	1398	1659
ENSDARG00000005033	ENSDART00000030273	7	11	11	GTATCCCACTGGCTGTTTGCTGGG	6	+	1470	1659
ENSDARG00000005033	ENSDART00000030273	7	12	12	TGCTCCAACCCCCAGGAGTTGGTG	6	+	1588	1659
ENSDARG00000005033	ENSDART00000030273	7	12	12	TGCTCCAACCCCCAGGAGTTGGT	5	+	1588	1659
ENSDARG00000005033	ENSDART00000030273	7	12	12	TCCAACCCCCAGGAGTTGGTGGT	5	+	1591	1659
ENSDARG00000005033	ENSDART00000030273	7	12	12	CTCCAACCCCCAGGAGTTGGTGGT	6	+	1590	1659
ENSDARG00000005092	ENSDART00000007365	7	1	1	TTCTCCTAAGGCTGAAGTTGAATTT	7	-	67	2133
ENSDARG00000005092	ENSDART00000007365	7	1	1	GCCAACCTCCTCGTTGCGGTGAG	5	-	27	2133
ENSDARG00000005092	ENSDART00000007365	7	3	3	CTCAAAGTCAGCTTGGCTGTCTGC	6	-	319	2133
ENSDARG00000005092	ENSDART00000007365	7	4	4	CAACTCTACCTTTTTGTGTTTTAA	6	-	565	2133
ENSDARG00000005092	ENSDART00000007365	7	4	4	GTCATCAGCTCTGCTCTGTCTCT	5	-	518	2133
ENSDARG00000005092	ENSDART00000007365	7	5	5	TTCCAAACCTTCAGTCTGTAGAG	5	-	641	2133
ENSDARG00000005092	ENSDART00000007365	7	5	5	CAAACCTTCAGTCTGTAGAGGGG	5	-	638	2133
ENSDARG00000005092	ENSDART00000007365	7	10	10	CTAAGCTCCACGTTAAGACGGTGGA	7	-	1124	2133
ENSDARG00000005092	ENSDART00000007365	7	10	10	CTCATCCACCAGCTCCTGTGCCTGT	7	-	1077	2133
ENSDARG00000005092	ENSDART00000007365	7	12	12	CACCTCACAGGACTTGAGGAGTTT	6	-	1303	2133
ENSDARG00000005092	ENSDART00000007365	7	14	14	GTACCATACCTTCTTGTGCATGT	5	-	1530	2133
ENSDARG00000005092	ENSDART00000007365	7	15	15	TCCAACAACATCACCTTTTTGGAC	6	-	1554	2133
ENSDARG00000005092	ENSDART00000007365	7	17	17	TGCTTCAGAACACTTATGCGCCTTT	7	-	1901	2133
ENSDARG00000005315	ENSDART00000018448	7	7	7	GTTTGCAGACACACAGAAGGATAA	6	+	642	1584
ENSDARG00000005315	ENSDART00000018448	7	7	7	CGCATCGCCCAGCAGCTGCAGCA	5	+	676	1584
ENSDARG00000005315	ENSDART00000018448	7	7	7	CAATGCTGCCTCCATGTGGGGAAAC	7	+	714	1584
ENSDARG00000005315	ENSDART00000018448	7	7	7	CAATGCTGCCTCCATGTGGGGAA	5	+	714	1584
ENSDARG00000005315	ENSDART00000018448	7	7	7	AGAAACGCATCGCCCAGCAGCTGCA	7	+	671	1584
ENSDARG00000005315	ENSDART00000018448	7	7	7	TTCTTCTCCCATCGTGGTGAAGTT	6	+	621	1584
ENSDARG00000005315	ENSDART00000018448	7	7	7	AAACGCATCGCCCAGCAGCTGCA	5	+	673	1584
ENSDARG00000005315	ENSDART00000018448	7	9	9	GGCCACACCTACAGGTAGCAGTG	5	+	903	1584
ENSDARG00000005315	ENSDART00000018448	7	9	9	TGCTCAATCTGCCTGGGATGCCTAC	7	+	990	1584
ENSDARG00000005315	ENSDART00000018448	7	11	11	GCAGCCAAAAAGAAGGTGAGTCT	5	+	1310	1584
ENSDARG00000005315	ENSDART00000018448	7	12	12	ACCATCTGCCACAGGAGTTTGGT	5	+	1352	1584
ENSDARG00000005315	ENSDART00000018448	7	13	13	GTTTTCAGATTGGAATGAAGCGGCT	7	+	1526	1584
ENSDARG00000005315	ENSDART00000041055	7	9	7	CGCATCGCCCAGCAGCTGCAGCA	5	+	709	1605
ENSDARG00000005315	ENSDART00000041055	7	9	7	CAATGCTGCCTCCATGTGGGGAAAC	7	+	747	1605
ENSDARG00000005315	ENSDART00000041055	7	9	7	CAATGCTGCCTCCATGTGGGGAA	5	+	747	1605
ENSDARG00000005315	ENSDART00000041055	7	9	7	AGAAACGCATCGCCCAGCAGCTGCA	7	+	704	1605
ENSDARG00000005315	ENSDART00000041055	7	9	7	TTCTTCTCCCATCGTGGTGAAGTT	6	+	654	1605
ENSDARG00000005315	ENSDART00000041055	7	9	7	AAACGCATCGCCCAGCAGCTGCA	5	+	706	1605
ENSDARG00000005315	ENSDART00000041055	7	9	7	GTTTGCAGACACACAGAAGGATAA	6	+	675	1605
ENSDARG00000005315	ENSDART00000041055	7	11	9	TGCTCAATCTGCCTGGGATGCCTAC	7	+	1011	1605
ENSDARG00000005315	ENSDART00000041055	7	11	9	GGCCACACCTACAGGTAGCAGTG	5	+	924	1605
ENSDARG00000005315	ENSDART00000041055	7	13	11	GCAGCCAAAAAGAAGGTGAGTCT	5	+	1331	1605
ENSDARG00000005315	ENSDART00000041055	7	14	12	ACCATCTGCCACAGGAGTTTGGT	5	+	1373	1605
ENSDARG00000005315	ENSDART00000041055	7	15	13	GTTTTCAGATTGGAATGAAGCGGCT	7	+	1547	1605
ENSDARG00000005315	ENSDART00000100481	7	6	6	TTCTTCTCCCATCGTGGTGAAGTT	6	+	507	1437
ENSDARG00000005315	ENSDART00000100481	7	6	6	GTTTGCAGACACACAGAAGGATAA	6	+	528	1437
ENSDARG00000005315	ENSDART00000100481	7	6	6	CGCATCGCCCAGCAGCTGCAGCA	5	+	562	1437
ENSDARG00000005315	ENSDART00000100481	7	6	6	CAATGCTGCCTCCATGTGGGGAAAC	7	+	600	1437
ENSDARG00000005315	ENSDART00000100481	7	6	6	CAATGCTGCCTCCATGTGGGGAA	5	+	600	1437
ENSDARG00000005315	ENSDART00000100481	7	6	6	AAACGCATCGCCCAGCAGCTGCA	5	+	559	1437
ENSDARG00000005315	ENSDART00000100481	7	6	6	AGAAACGCATCGCCCAGCAGCTGCA	7	+	557	1437
ENSDARG00000005315	ENSDART00000100481	7	8	8	GGCCACACCTACAGGTAGCAGTG	5	+	777	1437
ENSDARG00000005315	ENSDART00000100481	7	12	12	ACCATCTGCCACAGGAGTTTGGT	5	+	1205	1437
ENSDARG00000005315	ENSDART00000100481	7	13	13	GTTTTCAGATTGGAATGAAGCGGCT	7	+	1379	1437
ENSDARG00000005374	ENSDART00000009649	7	3	3	AAAGCCTGCCGATAAGGCTGCAGCA	7	-	296	2010
ENSDARG00000005374	ENSDART00000009649	7	3	3	GGCTGCAGCATAGAGTGGAGGCC	5	-	283	2010
ENSDARG00000005374	ENSDART00000009649	7	6	6	GCAGTCCTCCACAGCTGTGCTTGT	6	-	482	2010
ENSDARG00000005374	ENSDART00000009649	7	7	7	TCCTCATCCTCCTCCTGTGCAGCA	6	-	654	2010
ENSDARG00000005374	ENSDART00000009649	7	7	7	TCCTCCTCCTGTGCAGCAGTGGCT	6	-	648	2010
ENSDARG00000005374	ENSDART00000009649	7	7	7	CTCATCCTCCTCCTGTGCAGCAGTG	7	-	651	2010
ENSDARG00000005374	ENSDART00000009649	7	7	7	ATCCTCCTCCTGTGCAGCAGTGGCT	7	-	648	2010
ENSDARG00000005374	ENSDART00000009649	7	7	7	TTCCTCATCCTCCTCCTGTGCAGCA	7	-	654	2010
ENSDARG00000005374	ENSDART00000009649	7	13	13	TGCAGCCCAGCCAGTGGGCGGAG	5	-	1352	2010
ENSDARG00000005374	ENSDART00000009649	7	13	13	TGCAGCCCAGCCAGTGGGCGGAGCT	7	-	1350	2010
ENSDARG00000005374	ENSDART00000009649	7	13	13	TACTTCTCCAACACAGCAGGAGTG	6	-	1419	2010
ENSDARG00000005374	ENSDART00000009649	7	14	14	TACTGCATCCGTCTGGTTTGATTTG	7	-	1533	2010
ENSDARG00000005374	ENSDART00000009649	7	14	14	TACTGCATCCGTCTGGTTTGATTT	6	-	1534	2010
ENSDARG00000005374	ENSDART00000009649	7	15	15	AGACTCACAGGTTTGAGTAGAATAA	7	-	1736	2010
ENSDARG00000005374	ENSDART00000009649	7	17	17	GCCTCCTGCCTGTGTGTAGTATTT	6	-	1975	2010
ENSDARG00000005374	ENSDART00000009649	7	17	17	CAAGTCAGAGTTTATCTGGTGGT	5	-	1922	2010
ENSDARG00000005448	ENSDART00000053814	7	1	1	TTCTGCCCAAGAGAAATAAGCCTCT	7	-	97	1170
ENSDARG00000005448	ENSDART00000053814	7	1	1	TTAGACGCAGACTGTGTTTGAGTT	6	-	135	1170
ENSDARG00000005448	ENSDART00000053814	7	1	1	GACAGCAAACGACCTGGGACTGT	5	-	37	1170
ENSDARG00000005448	ENSDART00000053814	7	1	1	AGCCTCTTCTATGGCGCGTGAAAC	6	-	80	1170
ENSDARG00000005448	ENSDART00000053814	7	9	9	TTCTTCAACATGCTTTGATGGAGAT	7	-	1055	1170
ENSDARG00000005456	ENSDART00000014632	7	3	2	GAAGACACATTGCTGGAATGAGCC	6	-	60	2082
ENSDARG00000005456	ENSDART00000014632	7	4	3	TGCATCCCACAGCACTGGTGTGGCC	7	-	190	2082
ENSDARG00000005456	ENSDART00000014632	7	4	3	TCCAAATCCCAAAGCCGAAGAGAAC	7	-	263	2082
ENSDARG00000005456	ENSDART00000014632	7	4	3	GCCTCCAAATCCCAAAGCCGAAGAG	7	-	266	2082
ENSDARG00000005456	ENSDART00000014632	7	4	3	GCATCCCACAGCACTGGTGTGGCC	6	-	190	2082
ENSDARG00000005456	ENSDART00000014632	7	4	3	CTCCAAATCCCAAAGCCGAAGAG	5	-	266	2082
ENSDARG00000005456	ENSDART00000014632	7	4	3	CAAATCCCAAAGCCGAAGAGAAC	5	-	263	2082
ENSDARG00000005456	ENSDART00000014632	7	5	4	TGCCCCATCAACGTGCGTAGAAC	5	-	298	2082
ENSDARG00000005456	ENSDART00000014632	7	7	6	CTAGACAGCGCACAGCCTGAGTG	5	-	447	2082
ENSDARG00000005456	ENSDART00000014632	7	10	9	CACAAACCATTTGGTTGTTGCTGAT	7	-	847	2082
ENSDARG00000005456	ENSDART00000014632	7	10	9	GCACAAACCATTTGGTTGTTGCT	5	-	850	2082
ENSDARG00000005456	ENSDART00000014632	7	11	10	CGCTCATAATTCCGCCGAAGTGTTG	7	-	998	2082
ENSDARG00000005456	ENSDART00000014632	7	12	11	TTCTCATCCTCACTGCTGGGACTTC	7	-	1100	2082
ENSDARG00000005456	ENSDART00000014632	7	12	11	CTCATCCTCACTGCTGGGACTTC	5	-	1100	2082
ENSDARG00000005456	ENSDART00000014632	7	14	13	TTAACCACAGGTCGAGATGGAGAG	6	-	1431	2082
ENSDARG00000005456	ENSDART00000014632	7	14	13	TACCACTGCTACTGGACGGGGAG	5	-	1394	2082
ENSDARG00000005456	ENSDART00000014632	7	14	13	CACTGCTACTGGACGGGGAGCAGCG	7	-	1389	2082
ENSDARG00000005456	ENSDART00000014632	7	15	14	CTCTTCATCTCCCATTGCGCTGGC	6	-	1558	2082
ENSDARG00000005456	ENSDART00000014632	7	15	14	TTCATCTCCCATTGCGCTGGCTTT	6	-	1555	2082
ENSDARG00000005456	ENSDART00000014632	7	17	16	AGCAACTCCTCAATCTGTGGCAGGA	7	-	1799	2082
ENSDARG00000005456	ENSDART00000014632	7	17	16	CAACTCCTCAATCTGTGGCAGGA	5	-	1799	2082
ENSDARG00000005456	ENSDART00000014632	7	18	17	CACTCCGACAGATGGAGGAGCGTTC	7	-	1914	2082
ENSDARG00000005456	ENSDART00000014632	7	18	17	GTCCACTCCGACAGATGGAGGAGCG	7	-	1917	2082
ENSDARG00000005549	ENSDART00000002892	7	1	1	TTCTCCTGCAGTCAGTGTGGCCTGC	7	+	1447	2079
ENSDARG00000005549	ENSDART00000002892	7	1	1	TGCGGCAAACTCTTTAAGCAGCC	5	+	1042	2079
ENSDARG00000005549	ENSDART00000002892	7	1	1	TGCACCAACAGATGGACGCAGGG	5	+	56	2079
ENSDARG00000005549	ENSDART00000002892	7	1	1	GTCCCCTGCTCCGCCGGGTGAGAG	6	+	204	2079
ENSDARG00000005549	ENSDART00000002892	7	1	1	GGCCCAAGCTGCTGTGTTGGGAC	5	+	111	2079
ENSDARG00000005549	ENSDART00000002892	7	1	1	GAATACGCAGACCAACTTATAGGTG	7	+	238	2079
ENSDARG00000005549	ENSDART00000002892	7	1	1	GAAAACAACGATGGGATGTTTTGGA	7	+	808	2079
ENSDARG00000005549	ENSDART00000002892	7	1	1	GAAAACAACGATGGGATGTTTTG	5	+	808	2079
ENSDARG00000005549	ENSDART00000002892	7	1	1	CTCATCTCCCAGAACGAGGTCTTT	6	+	133	2079
ENSDARG00000005549	ENSDART00000002892	7	1	1	AGCTGCAGAATCACCTGCTGAAGCA	7	+	1406	2079
ENSDARG00000005549	ENSDART00000002892	7	3	3	TGCACCTCCATGCAGGCAGTAAAC	6	+	1787	2079
ENSDARG00000005549	ENSDART00000002892	7	4	4	TACAACTTCGGGAAGGATGTGGGA	6	+	2050	2079
ENSDARG00000005612	ENSDART00000008096	7	5	5	GCCAAAGTCATGAAGGCTGAGGAG	6	-	483	774
ENSDARG00000005612	ENSDART00000008096	7	5	5	GCCAAAGTCATGAAGGCTGAGGA	5	-	484	774
ENSDARG00000005612	ENSDART00000008096	7	5	5	CCCCCCAGAACATGTGGAGCAGGA	6	-	512	774
ENSDARG00000005612	ENSDART00000008096	7	5	5	CACCCCCCAGAACATGTGGAGCA	5	-	515	774
ENSDARG00000005612	ENSDART00000008096	7	5	5	ACCACCCCCCAGAACATGTGGAGCA	7	-	515	774
ENSDARG00000005651	ENSDART00000015040	7	3	2	GTCCTCAAAAGATTTGGTATTGTTG	7	-	261	570
ENSDARG00000005651	ENSDART00000015040	7	3	2	TCCTCAAAAGATTTGGTATTGTTG	6	-	261	570
ENSDARG00000005651	ENSDART00000015040	7	5	4	TTCCTCAACTTATGCTGCCTGATTT	7	-	497	570
ENSDARG00000005800	ENSDART00000003612	7	1	1	GTCTTCTTCTTTCAGTGCCGAGGCA	7	-	96	2289
ENSDARG00000005800	ENSDART00000003612	7	1	1	TGCTCAGCCAGTTCTCTGAGTAG	5	-	196	2289
ENSDARG00000005800	ENSDART00000003612	7	1	1	GCAATCTTCGGGAACTGCCGTGGCA	7	-	23	2289
ENSDARG00000005800	ENSDART00000003612	7	2	2	GTAGTCTCCGCTAATGGTGACTCT	6	-	388	2289
ENSDARG00000005800	ENSDART00000003612	7	6	6	CTCGGCGTCGGTTTTGTAGGTGGT	6	-	1000	2289
ENSDARG00000005800	ENSDART00000003612	7	6	6	TGCTGCTGCGTGGATATGGGTGTCT	7	-	939	2289
ENSDARG00000005800	ENSDART00000003612	7	6	6	GAACAACTCTCTCGGCGTCGGTTTT	7	-	1009	2289
ENSDARG00000005800	ENSDART00000003612	7	8	8	TCCAGCGCATATTAGGAGAGTAC	5	-	1383	2289
ENSDARG00000005800	ENSDART00000003612	7	10	10	GTTGTCCACTGCTCAGGTTTAGGGC	7	-	1619	2289
ENSDARG00000005800	ENSDART00000003612	7	11	11	GGCTTCTCCACAGTGCGGACGAA	5	-	1745	2289
ENSDARG00000005800	ENSDART00000003612	7	13	13	AAAGGCCGCTCTGCAAGACGCTGTT	7	-	2092	2289
ENSDARG00000005800	ENSDART00000003612	7	14	14	AGCATCCACGAGGAAGCTGAGTTC	6	-	2242	2289
ENSDARG00000005800	ENSDART00000003612	7	14	14	GACAGCATCCACGAGGAAGCTGAG	6	-	2245	2289
ENSDARG00000005800	ENSDART00000061300	7	1	1	GTCTTCTTCTTTCAGTGCCGAGGCA	7	-	72	2157
ENSDARG00000005800	ENSDART00000061300	7	1	1	TGCTCAGCCAGTTCTCTGAGTAG	5	-	172	2157
ENSDARG00000005800	ENSDART00000061300	7	3	3	GTAGTCTCCGCTAATGGTGACTCT	6	-	277	2157
ENSDARG00000005800	ENSDART00000061300	7	7	7	GAACAACTCTCTCGGCGTCGGTTTT	7	-	898	2157
ENSDARG00000005800	ENSDART00000061300	7	7	7	CTCGGCGTCGGTTTTGTAGGTGGT	6	-	889	2157
ENSDARG00000005800	ENSDART00000061300	7	7	7	TGCTGCTGCGTGGATATGGGTGTCT	7	-	828	2157
ENSDARG00000005800	ENSDART00000061300	7	9	9	TCCAGCGCATATTAGGAGAGTAC	5	-	1272	2157
ENSDARG00000005800	ENSDART00000061300	7	11	11	GTTGTCCACTGCTCAGGTTTAGGGC	7	-	1508	2157
ENSDARG00000005800	ENSDART00000061300	7	12	12	GGCTTCTCCACAGTGCGGACGAA	5	-	1634	2157
ENSDARG00000005800	ENSDART00000061300	7	14	14	AAAGGCCGCTCTGCAAGACGCTGTT	7	-	1981	2157
ENSDARG00000005800	ENSDART00000061300	7	15	15	GACAGCATCCACGAGGAAGCTGAG	6	-	2134	2157
ENSDARG00000005800	ENSDART00000061300	7	15	15	AGCATCCACGAGGAAGCTGAGTTC	6	-	2131	2157
ENSDARG00000005821	ENSDART00000008476	7	1	1	GGCCTCATCCCACTGGCGAAGGG	5	-	26	1485
ENSDARG00000005821	ENSDART00000008476	7	1	1	GCCTCATCCCACTGGCGAAGGGTGC	7	-	23	1485
ENSDARG00000005821	ENSDART00000008476	7	1	1	CTCATCCCACTGGCGAAGGGTGC	5	-	23	1485
ENSDARG00000005821	ENSDART00000008476	7	3	3	ATCTCAGCCCCAGAGGTGTGTAA	5	-	333	1485
ENSDARG00000005821	ENSDART00000008476	7	6	6	AAAACCAGAAAACTCATCTGCAGGT	7	-	636	1485
ENSDARG00000005821	ENSDART00000008476	7	8	8	ACAGCCAGCTCCTCTTTAGTCTCT	6	-	768	1485
ENSDARG00000005821	ENSDART00000008476	7	8	8	AACTCATACAGAACAGTGTGTGGCT	7	-	737	1485
ENSDARG00000005821	ENSDART00000008476	7	10	10	ACAGTCTTCAGGCCTTCTGGAGCC	6	-	975	1485
ENSDARG00000005821	ENSDART00000008476	7	12	12	TTCTGCAGAGCCTTCCTTAGCATAC	7	-	1176	1485
ENSDARG00000005821	ENSDART00000008476	7	14	14	AGCCACAACCTTTGCATGGGATGCA	7	-	1311	1485
ENSDARG00000005821	ENSDART00000008476	7	14	14	AGAGCCACAACCTTTGCATGGGAT	6	-	1314	1485
ENSDARG00000005821	ENSDART00000099138	7	1	1	CTCATCCCACTGGCGAAGGGTGC	5	-	23	1500
ENSDARG00000005821	ENSDART00000099138	7	1	1	GGCCTCATCCCACTGGCGAAGGG	5	-	26	1500
ENSDARG00000005821	ENSDART00000099138	7	1	1	GCCTCATCCCACTGGCGAAGGGTGC	7	-	23	1500
ENSDARG00000005821	ENSDART00000099138	7	3	3	ATCTCAGCCCCAGAGGTGTGTAA	5	-	333	1500
ENSDARG00000005821	ENSDART00000099138	7	6	6	AAAACCAGAAAACTCATCTGCAGGT	7	-	636	1500
ENSDARG00000005821	ENSDART00000099138	7	8	8	ACAGCCAGCTCCTCTTTAGTCTCT	6	-	768	1500
ENSDARG00000005821	ENSDART00000099138	7	8	8	AACTCATACAGAACAGTGTGTGGCT	7	-	737	1500
ENSDARG00000005821	ENSDART00000099138	7	10	10	ACAGTCTTCAGGCCTTCTGGAGCC	6	-	1002	1500
ENSDARG00000005821	ENSDART00000099138	7	12	12	TTCTGCAGAGCCTTCCTTAGCATAC	7	-	1188	1500
ENSDARG00000005821	ENSDART00000099138	7	13	13	AGCCACAACCTTTGCATGGGATGCA	7	-	1308	1500
ENSDARG00000005821	ENSDART00000099138	7	13	13	AGAGCCACAACCTTTGCATGGGAT	6	-	1311	1500
ENSDARG00000005840	ENSDART00000007767	7	1	1	TTCCCATACCTGGCTCTAATAGGTA	7	-	77	1284
ENSDARG00000005840	ENSDART00000007767	7	3	3	TACTCACCCTCTTGCTTTTGAGAA	6	-	362	1284
ENSDARG00000005840	ENSDART00000007767	7	3	3	CTCACCCTCTTGCTTTTGAGAAC	5	-	361	1284
ENSDARG00000005840	ENSDART00000007767	7	3	3	TACTCACCCTCTTGCTTTTGAGAAC	7	-	361	1284
ENSDARG00000005840	ENSDART00000007767	7	5	5	TCCCTCGCAACTGTGTGGAAGCG	5	-	442	1284
ENSDARG00000005840	ENSDART00000007767	7	5	5	ACATCCCTCGCAACTGTGTGGAA	5	-	445	1284
ENSDARG00000005840	ENSDART00000007767	7	6	6	GTCAACACCAGTGGGGTTATGAGCA	7	-	639	1284
ENSDARG00000005840	ENSDART00000007767	7	6	6	TCCTTCCACTGCTCTGGTCGTGGGT	7	-	662	1284
ENSDARG00000005840	ENSDART00000007767	7	7	7	GCAAAAGACTGTGACAGGAGAATGT	7	-	812	1284
ENSDARG00000005840	ENSDART00000007767	7	8	8	GCACCATTCATGGGAGGGTTGGAG	6	-	951	1284
ENSDARG00000005894	ENSDART00000033261	7	2	2	CCCTCCAGCACCGCTTTGGGGGA	5	-	91	1209
ENSDARG00000005894	ENSDART00000033261	7	2	2	GTTCCCTCCAGCACCGCTTTGGGG	6	-	93	1209
ENSDARG00000005894	ENSDART00000033261	7	7	7	CACCACAGCAACAGCTGAAGACTGT	7	-	792	1209
ENSDARG00000005894	ENSDART00000033261	7	7	7	CTCACCACAGCAACAGCTGAAGAC	6	-	795	1209
ENSDARG00000005894	ENSDART00000100479	7	1	1	GTTCCCTCCAGCACCGCTTTGGGG	6	-	78	1167
ENSDARG00000005894	ENSDART00000100479	7	1	1	CCCTCCAGCACCGCTTTGGGGGA	5	-	76	1167
ENSDARG00000005894	ENSDART00000100479	7	6	6	CTCACCACAGCAACAGCTGAAGAC	6	-	780	1167
ENSDARG00000005894	ENSDART00000100479	7	6	6	CACCACAGCAACAGCTGAAGACTGT	7	-	777	1167
ENSDARG00000005993	ENSDART00000026759	7	4	4	TTCTCAGCAGTGAGGCAGGAGAT	5	-	487	1821
ENSDARG00000005993	ENSDART00000026759	7	6	6	ACATCACGCTCCTCTTGTGGAATCT	7	-	761	1821
ENSDARG00000005993	ENSDART00000026759	7	9	9	GTTTCCTCCTCTGTTGGTGAATCT	6	-	1138	1821
ENSDARG00000005993	ENSDART00000026759	7	10	10	TCCCACTGCTCAATCTCTGCCTTC	6	-	1227	1821
ENSDARG00000005993	ENSDART00000026759	7	11	11	GAAATCTTCGTTTAGTCGGTGTG	5	-	1416	1821
ENSDARG00000005993	ENSDART00000026759	7	13	13	TGCGACAGAGTTAATGCTGAAGTT	6	-	1711	1821
ENSDARG00000005993	ENSDART00000026759	7	13	13	AGCAACACCACCGGTTAGATGGC	5	-	1655	1821
ENSDARG00000005993	ENSDART00000098824	7	4	4	TTCTCAGCAGTGAGGCAGGAGAT	5	-	487	1815
ENSDARG00000005993	ENSDART00000098824	7	6	6	ACATCACGCTCCTCTTGTGGAATCT	7	-	761	1815
ENSDARG00000005993	ENSDART00000098824	7	9	9	GTTTCCTCCTCTGTTGGTGAATCT	6	-	1138	1815
ENSDARG00000005993	ENSDART00000098824	7	10	10	TCCCACTGCTCAATCTCTGCCTTC	6	-	1227	1815
ENSDARG00000005993	ENSDART00000098824	7	11	11	GAAATCTTCGTTTAGTCGGTGTG	5	-	1416	1815
ENSDARG00000005993	ENSDART00000098824	7	13	13	TGCGACAGAGTTAATGCTGAAGTT	6	-	1711	1815
ENSDARG00000005993	ENSDART00000098824	7	13	13	AGCAACACCACCGGTTAGATGGC	5	-	1655	1815
ENSDARG00000006300	ENSDART00000012918	7	2	2	GTACTCACAGGAGATGCTGTGTCT	6	-	217	627
ENSDARG00000006300	ENSDART00000012918	7	3	3	TCCACCAGAGCGAACGGAGGCGGCG	7	-	362	627
ENSDARG00000006300	ENSDART00000012918	7	3	3	TCCACCGTCTGACCGCTGCTTTC	5	-	337	627
ENSDARG00000006300	ENSDART00000012918	7	3	3	GACCGCTGCTTTCCATCTGTGTGT	6	-	326	627
ENSDARG00000006300	ENSDART00000012918	7	3	3	TCCACCAGAGCGAACGGAGGCGGC	6	-	363	627
ENSDARG00000006300	ENSDART00000012918	7	4	4	CAACAAACCCCTTCACTGTGCTGGA	7	-	506	627
ENSDARG00000006300	ENSDART00000012918	7	4	4	ACAAACCCCTTCACTGTGCTGGA	5	-	506	627
ENSDARG00000006300	ENSDART00000012918	7	4	4	AACAAACCCCTTCACTGTGCTGGA	6	-	506	627
ENSDARG00000006487	ENSDART00000008785	7	2	2	ACATCAGTCACCAATTTGCCGAA	5	+	172	762
ENSDARG00000006487	ENSDART00000008785	7	4	4	GCCTCAAAAGTTTAGACTTGTTC	5	+	350	762
ENSDARG00000006487	ENSDART00000008785	7	4	4	GAAAGCCTCAAAAGTTTAGACTTG	6	+	346	762
ENSDARG00000006487	ENSDART00000008785	7	4	4	AGCTGCTCCCTCAGTTGACGTATCT	7	+	419	762
ENSDARG00000006487	ENSDART00000008785	7	4	4	AGCGCCAGACTCTGATGCTGAAGCT	7	+	471	762
ENSDARG00000006487	ENSDART00000008785	7	4	4	AGCCTCAAAAGTTTAGACTTGTTC	6	+	349	762
ENSDARG00000006487	ENSDART00000008785	7	4	4	AGAAGCGCCAGACTCTGATGCTGAA	7	+	468	762
ENSDARG00000006487	ENSDART00000008785	7	5	5	AGATGCAGCTCCAGGAGAAGAAGAT	7	+	561	762
ENSDARG00000006494	ENSDART00000006343	7	3	1	GTCTTCCTCGAGCATGGAGGTAAAC	7	+	202	954
ENSDARG00000006494	ENSDART00000006343	7	3	1	GCCAACGGCTGGACGCTGCTGCA	5	+	142	954
ENSDARG00000006494	ENSDART00000006343	7	3	1	GACGCCAACGGCTGGACGCTGCT	5	+	139	954
ENSDARG00000006494	ENSDART00000006343	7	3	1	GAACCCAGAGCTGCAGGAGGAGCT	6	+	33	954
ENSDARG00000006494	ENSDART00000006343	7	3	1	CGCTGCTGCACTTCTCTGCAGCA	5	+	155	954
ENSDARG00000006494	ENSDART00000006343	7	3	1	TACACCGTCCGCAAGATGCTGGA	5	+	91	954
ENSDARG00000006494	ENSDART00000006343	7	3	1	ACCGTCCGCAAGATGCTGGAGCA	5	+	94	954
ENSDARG00000006494	ENSDART00000006343	7	4	2	ATCGCCCGCCTCATGCTGGAGTC	5	+	295	954
ENSDARG00000006494	ENSDART00000006343	7	4	2	GGCCGCGACTCCTTTGTGCGGCT	5	+	391	954
ENSDARG00000006494	ENSDART00000006343	7	4	2	GGCAACCACTCGTACTGCCGCATGT	7	+	580	954
ENSDARG00000006494	ENSDART00000006343	7	4	2	GCCTCATGCTGGAGTCTGAGTAC	5	+	302	954
ENSDARG00000006494	ENSDART00000006343	7	4	2	GCCCTCAGAGACGATGTGCAGTG	5	+	673	954
ENSDARG00000006494	ENSDART00000006343	7	4	2	CAACCACTCGTACTGCCGCATGT	5	+	582	954
ENSDARG00000006501	ENSDART00000052044	7	1	1	GTTGACTGCACTGGTTCTGTTGTG	6	+	12	1341
ENSDARG00000006501	ENSDART00000052044	7	1	1	GTTCCAATCTTTGGTAATTTGTT	5	+	109	1341
ENSDARG00000006501	ENSDART00000052044	7	2	2	GTTCACAGCCAGCAGTGGTGTTAAC	7	+	212	1341
ENSDARG00000006501	ENSDART00000052044	7	5	5	CAAGACGTCACGTGTTGCTGGGGA	6	+	756	1341
ENSDARG00000006501	ENSDART00000052044	7	5	5	ACACAAGACGTCACGTGTTGCTGGG	7	+	753	1341
ENSDARG00000006501	ENSDART00000052044	7	5	5	CAAGACGTCACGTGTTGCTGGGGAG	7	+	756	1341
ENSDARG00000006501	ENSDART00000052044	7	6	6	CACTCCGCACTTTAACTCTGTATTT	7	+	914	1341
ENSDARG00000006501	ENSDART00000052044	7	8	8	GTCATCTTCTCTCAGAGAGGAAGGT	7	+	1173	1341
ENSDARG00000006501	ENSDART00000052054	7	2	2	GTTGACTGCACTGGTTCTGTTGTG	6	+	54	1530
ENSDARG00000006501	ENSDART00000052054	7	2	2	GTTCCAATCTTTGGTAATTTGTT	5	+	151	1530
ENSDARG00000006501	ENSDART00000052054	7	3	3	GTTCACAGCCAGCAGTGGTGTTAAC	7	+	254	1530
ENSDARG00000006501	ENSDART00000052054	7	6	6	CAAGACGTCACGTGTTGCTGGGGAG	7	+	798	1530
ENSDARG00000006501	ENSDART00000052054	7	6	6	CAAGACGTCACGTGTTGCTGGGGA	6	+	798	1530
ENSDARG00000006501	ENSDART00000052054	7	6	6	ACACAAGACGTCACGTGTTGCTGGG	7	+	795	1530
ENSDARG00000006501	ENSDART00000052054	7	7	7	CACTCCGCACTTTAACTCTGTATTT	7	+	956	1530
ENSDARG00000006501	ENSDART00000052054	7	9	9	GTCATCTTCTCTCAGAGAGGAAGGT	7	+	1215	1530
ENSDARG00000006501	ENSDART00000052055	7	1	1	GTTGACTGCACTGGTTCTGTTGTG	6	+	84	1560
ENSDARG00000006501	ENSDART00000052055	7	1	1	GTTCCAATCTTTGGTAATTTGTT	5	+	181	1560
ENSDARG00000006501	ENSDART00000052055	7	2	2	GTTCACAGCCAGCAGTGGTGTTAAC	7	+	284	1560
ENSDARG00000006501	ENSDART00000052055	7	5	5	CAAGACGTCACGTGTTGCTGGGGAG	7	+	828	1560
ENSDARG00000006501	ENSDART00000052055	7	5	5	ACACAAGACGTCACGTGTTGCTGGG	7	+	825	1560
ENSDARG00000006501	ENSDART00000052055	7	5	5	CAAGACGTCACGTGTTGCTGGGGA	6	+	828	1560
ENSDARG00000006501	ENSDART00000052055	7	6	6	CACTCCGCACTTTAACTCTGTATTT	7	+	986	1560
ENSDARG00000006501	ENSDART00000052055	7	8	8	GTCATCTTCTCTCAGAGAGGAAGGT	7	+	1245	1560
ENSDARG00000006501	ENSDART00000052056	7	1	1	GTTGACTGCACTGGTTCTGTTGTG	6	+	12	1239
ENSDARG00000006501	ENSDART00000052056	7	1	1	GTTCCAATCTTTGGTAATTTGTT	5	+	109	1239
ENSDARG00000006501	ENSDART00000052056	7	2	2	GTTCACAGCCAGCAGTGGTGTTAAC	7	+	212	1239
ENSDARG00000006501	ENSDART00000052056	7	5	5	CAAGACGTCACGTGTTGCTGGGGAG	7	+	756	1239
ENSDARG00000006501	ENSDART00000052056	7	5	5	CAAGACGTCACGTGTTGCTGGGGA	6	+	756	1239
ENSDARG00000006501	ENSDART00000052056	7	5	5	ACACAAGACGTCACGTGTTGCTGGG	7	+	753	1239
ENSDARG00000006501	ENSDART00000052056	7	6	6	CACTCCGCACTTTAACTCTGTATTT	7	+	914	1239
ENSDARG00000006501	ENSDART00000052056	7	8	8	GTCATCTTCTCTCAGAGAGGAAGGT	7	+	1173	1239
ENSDARG00000006545	ENSDART00000048921	7	6	5	CTCCTCCTCAAGGAAAGGGTTTGAA	7	-	537	1158
ENSDARG00000006545	ENSDART00000048921	7	7	6	TTCCCCCGCACGTTTGTGATGTT	5	-	649	1158
ENSDARG00000006545	ENSDART00000048921	7	7	6	TCCCCCGCACGTTTGTGATGTTGAA	7	-	646	1158
ENSDARG00000006545	ENSDART00000048921	7	8	7	CACCTCCTCTTCACTTTGCAGAC	5	-	779	1158
ENSDARG00000006545	ENSDART00000048921	7	8	7	TGCACCTCCTCTTCACTTTGCAGAC	7	-	779	1158
ENSDARG00000006545	ENSDART00000048921	7	9	8	GACAAACTCAAAATGCAGACGCC	5	-	959	1158
ENSDARG00000006545	ENSDART00000048921	7	9	8	CAACTCAAATATTGATGCTGTTTGT	7	-	1150	1158
ENSDARG00000006754	ENSDART00000021502	7	2	1	ACAAAATGCTGAATGTTGCTGTG	5	-	34	1665
ENSDARG00000006754	ENSDART00000021502	7	4	3	AAACTCTTCCGTGGGGTTGTTGAA	6	-	283	1665
ENSDARG00000006754	ENSDART00000021502	7	7	6	AAAAACTGCTTTTCCGTTTTTTGGT	7	-	850	1665
ENSDARG00000006754	ENSDART00000021502	7	7	6	GAAGGCTTATCCTTGTGGTCTTT	5	-	589	1665
ENSDARG00000006754	ENSDART00000021502	7	7	6	TGCTCCTTCGACGCGCTCTTGGGCT	7	-	749	1665
ENSDARG00000006754	ENSDART00000021502	7	8	7	GTCCACGTCCAAAGCCGGAGCTGGA	7	-	1132	1665
ENSDARG00000006754	ENSDART00000021502	7	11	10	TCCATCTTCGCCTGTTTTATAGGAC	7	-	1421	1665
ENSDARG00000006754	ENSDART00000021502	7	13	12	TGCAGCTTCCGAACTGTGGTTTTG	6	-	1623	1665
ENSDARG00000006754	ENSDART00000021502	7	13	12	TGCAGCTTCCGAACTGTGGTTTT	5	-	1624	1665
ENSDARG00000006754	ENSDART00000021502	7	13	12	GTCAAAGTCAAAGGTTGTGTTTGTG	7	-	1584	1665
ENSDARG00000006754	ENSDART00000021502	7	13	12	GTCAAAGTCAAAGGTTGTGTTTGT	6	-	1585	1665
ENSDARG00000006754	ENSDART00000053278	7	2	1	ACAAAATGCTGAATGTTGCTGTG	5	-	34	1665
ENSDARG00000006754	ENSDART00000053278	7	4	3	AAACTCTTCCGTGGGGTTGTTGAA	6	-	283	1665
ENSDARG00000006754	ENSDART00000053278	7	7	6	TGCTCCTTCGACGCGCTCTTGGGCT	7	-	749	1665
ENSDARG00000006754	ENSDART00000053278	7	7	6	GAAGGCTTATCCTTGTGGTCTTT	5	-	589	1665
ENSDARG00000006754	ENSDART00000053278	7	7	6	AAAAACTGCTTTTCCGTTTTTTGGT	7	-	850	1665
ENSDARG00000006754	ENSDART00000053278	7	8	7	GTCCACGTCCAAAGCCGGAGCTGGA	7	-	1132	1665
ENSDARG00000006754	ENSDART00000053278	7	11	10	TCCATCTTCGCCTGTTTTATAGGAC	7	-	1421	1665
ENSDARG00000006754	ENSDART00000053278	7	13	12	GTCAAAGTCAAAGGTTGTGTTTGT	6	-	1585	1665
ENSDARG00000006754	ENSDART00000053278	7	13	12	TGCAGCTTCCGAACTGTGGTTTTG	6	-	1623	1665
ENSDARG00000006754	ENSDART00000053278	7	13	12	TGCAGCTTCCGAACTGTGGTTTT	5	-	1624	1665
ENSDARG00000006754	ENSDART00000053278	7	13	12	GTCAAAGTCAAAGGTTGTGTTTGTG	7	-	1584	1665
ENSDARG00000006754	ENSDART00000054998	7	2	2	AAACTCTTCCGTGGGGTTGTTGAA	6	-	187	1512
ENSDARG00000006754	ENSDART00000054998	7	6	6	AAAAACTGCTTTTCCGTTTTTTGGT	7	-	697	1512
ENSDARG00000006754	ENSDART00000054998	7	6	6	TGCTCCTTCGACGCGCTCTTGGGCT	7	-	596	1512
ENSDARG00000006754	ENSDART00000054998	7	7	7	GTCCACGTCCAAAGCCGGAGCTGGA	7	-	979	1512
ENSDARG00000006754	ENSDART00000054998	7	10	10	TCCATCTTCGCCTGTTTTATAGGAC	7	-	1268	1512
ENSDARG00000006754	ENSDART00000054998	7	12	12	TGCAGCTTCCGAACTGTGGTTTTG	6	-	1470	1512
ENSDARG00000006754	ENSDART00000054998	7	12	12	TGCAGCTTCCGAACTGTGGTTTT	5	-	1471	1512
ENSDARG00000006754	ENSDART00000054998	7	12	12	GTCAAAGTCAAAGGTTGTGTTTGTG	7	-	1431	1512
ENSDARG00000006754	ENSDART00000054998	7	12	12	GTCAAAGTCAAAGGTTGTGTTTGT	6	-	1432	1512
ENSDARG00000006878	ENSDART00000037361	7	2	2	CAAGACGGCAGACGTTGGGAAGGT	6	+	66	1887
ENSDARG00000006878	ENSDART00000037361	7	5	5	TCCCTCAGAAAAAGGTGGTGGAGCA	7	+	203	1887
ENSDARG00000006878	ENSDART00000037361	7	5	5	GCAGACACAGACGCCTCTGCCTGC	6	+	315	1887
ENSDARG00000006878	ENSDART00000037361	7	5	5	TCCCTCAGAAAAAGGTGGTGGAG	5	+	203	1887
ENSDARG00000006878	ENSDART00000037361	7	5	5	AGACGCTACAAGCCGATGGGCAAAC	7	+	272	1887
ENSDARG00000006878	ENSDART00000037361	7	6	6	AGACTCTACCTCTGGTGTTGAGAG	6	+	389	1887
ENSDARG00000006878	ENSDART00000037361	7	6	6	TTCAAAGACTCTACCTCTGGTGTT	6	+	384	1887
ENSDARG00000006878	ENSDART00000037361	7	7	7	CACAACAGCCCAAGCTCTGACAAC	6	+	829	1887
ENSDARG00000006878	ENSDART00000037361	7	7	7	GGCCAAAGCCTCCAGTGTCTTTGAC	7	+	611	1887
ENSDARG00000006878	ENSDART00000037361	7	7	7	GCCAAAGCCTCCAGTGTCTTTGAC	6	+	612	1887
ENSDARG00000006878	ENSDART00000037361	7	13	13	AGATTCTGCAGAAGGAAGATGCC	5	+	1226	1887
ENSDARG00000006878	ENSDART00000037361	7	15	15	ACCCACAAATACAAACGCAGCAGCC	7	+	1773	1887
ENSDARG00000006878	ENSDART00000037361	7	15	15	AGCAGCAGCAACCTGGCGGTTCT	5	+	1810	1887
ENSDARG00000006878	ENSDART00000037361	7	15	15	ACAAGCGCAAAGTGCGACGAAGGC	6	+	1702	1887
ENSDARG00000006878	ENSDART00000037361	7	15	15	CACAAATACAAACGCAGCAGCCTTC	7	+	1776	1887
ENSDARG00000006878	ENSDART00000037361	7	15	15	CCCAGCAGAGAGACATGGAGGATTC	7	+	1439	1887
ENSDARG00000006878	ENSDART00000037361	7	15	15	GCCTTCAGCAATAACAGCAGCAGCA	7	+	1795	1887
ENSDARG00000006878	ENSDART00000100612	7	4	4	AGACGCTACAAGCCGATGGGCAAAC	7	+	224	1530
ENSDARG00000006878	ENSDART00000100612	7	4	4	TCCCTCAGAAAAAGGTGGTGGAG	5	+	155	1530
ENSDARG00000006878	ENSDART00000100612	7	4	4	GCAGACACAGACGCCTCTGCCTGC	6	+	267	1530
ENSDARG00000006878	ENSDART00000100612	7	4	4	TCCCTCAGAAAAAGGTGGTGGAGCA	7	+	155	1530
ENSDARG00000006878	ENSDART00000100612	7	6	6	AGACTCTACCTCTGGTGTTGAGAG	6	+	347	1530
ENSDARG00000006878	ENSDART00000100612	7	6	6	TTCAAAGACTCTACCTCTGGTGTT	6	+	342	1530
ENSDARG00000006878	ENSDART00000100612	7	7	7	GGCCAAAGCCTCCAGTGTCTTTGAC	7	+	569	1530
ENSDARG00000006878	ENSDART00000100612	7	7	7	GCCAAAGCCTCCAGTGTCTTTGAC	6	+	570	1530
ENSDARG00000006878	ENSDART00000100612	7	7	7	CACAACAGCCCAAGCTCTGACAAC	6	+	787	1530
ENSDARG00000006878	ENSDART00000100612	7	15	15	CCCAGCCCCAGCTCAGCAGGGGAT	6	+	1300	1530
ENSDARG00000006878	ENSDART00000100612	7	15	15	AGCCCCAGCTCAGCAGGGGATGTA	6	+	1303	1530
ENSDARG00000006878	ENSDART00000100612	7	18	18	GAATGCAGACTGTCAGCATTTGTG	6	+	1389	1530
ENSDARG00000006878	ENSDART00000100612	7	18	18	AGATTCTGCAGAAGGAAGATGCC	5	+	1445	1530
ENSDARG00000006878	ENSDART00000100612	7	18	18	GTTTTCCTCAGATTCTGCAGAAGGA	7	+	1436	1530
ENSDARG00000006878	ENSDART00000100614	7	2	2	CAAGACGGCAGACGTTGGGAAGGT	6	+	66	1887
ENSDARG00000006878	ENSDART00000100614	7	5	5	TCCCTCAGAAAAAGGTGGTGGAGCA	7	+	203	1887
ENSDARG00000006878	ENSDART00000100614	7	5	5	TCCCTCAGAAAAAGGTGGTGGAG	5	+	203	1887
ENSDARG00000006878	ENSDART00000100614	7	5	5	GCAGACACAGACGCCTCTGCCTGC	6	+	315	1887
ENSDARG00000006878	ENSDART00000100614	7	5	5	AGACGCTACAAGCCGATGGGCAAAC	7	+	272	1887
ENSDARG00000006878	ENSDART00000100614	7	6	6	TTCAAAGACTCTACCTCTGGTGTT	6	+	384	1887
ENSDARG00000006878	ENSDART00000100614	7	6	6	AGACTCTACCTCTGGTGTTGAGAG	6	+	389	1887
ENSDARG00000006878	ENSDART00000100614	7	7	7	GGCCAAAGCCTCCAGTGTCTTTGAC	7	+	611	1887
ENSDARG00000006878	ENSDART00000100614	7	7	7	CACAACAGCCCAAGCTCTGACAAC	6	+	829	1887
ENSDARG00000006878	ENSDART00000100614	7	7	7	GCCAAAGCCTCCAGTGTCTTTGAC	6	+	612	1887
ENSDARG00000006878	ENSDART00000100614	7	13	13	AGATTCTGCAGAAGGAAGATGCC	5	+	1226	1887
ENSDARG00000006878	ENSDART00000100614	7	15	15	CCCAGCAGAGAGACATGGAGGATTC	7	+	1439	1887
ENSDARG00000006878	ENSDART00000100614	7	15	15	GCCTTCAGCAATAACAGCAGCAGCA	7	+	1795	1887
ENSDARG00000006878	ENSDART00000100614	7	15	15	CACAAATACAAACGCAGCAGCCTTC	7	+	1776	1887
ENSDARG00000006878	ENSDART00000100614	7	15	15	ACCCACAAATACAAACGCAGCAGCC	7	+	1773	1887
ENSDARG00000006878	ENSDART00000100614	7	15	15	ACAAGCGCAAAGTGCGACGAAGGC	6	+	1702	1887
ENSDARG00000006878	ENSDART00000100614	7	15	15	AGCAGCAGCAACCTGGCGGTTCT	5	+	1810	1887
ENSDARG00000006889	ENSDART00000002449	7	1	1	TTCTGCTGCACACGGGGGACTTC	5	+	119	753
ENSDARG00000006889	ENSDART00000002449	7	1	1	GGCCACACACGTTTCGTGTGCGTGT	7	+	46	753
ENSDARG00000006889	ENSDART00000002449	7	3	3	AACCTCATCCCGGAGGGTGTCGAT	6	+	481	753
ENSDARG00000006889	ENSDART00000002449	7	3	3	ACCTCATCCCGGAGGGTGTCGAT	5	+	482	753
ENSDARG00000006889	ENSDART00000002449	7	4	4	GGCCCAAACTCCACGTCTTTGGAG	6	+	611	753
ENSDARG00000006889	ENSDART00000002449	7	4	4	GGCCCAAACTCCACGTCTTTGGA	5	+	611	753
ENSDARG00000006889	ENSDART00000002449	7	4	4	CCCAAACTCCACGTCTTTGGAGGA	6	+	613	753
ENSDARG00000006889	ENSDART00000002449	7	4	4	AGCTGCAAAGAGTGGGCTGTGTTG	6	+	557	753
ENSDARG00000006889	ENSDART00000002449	7	4	4	AAACTCCACGTCTTTGGAGGAATTC	7	+	616	753
ENSDARG00000006889	ENSDART00000002449	7	5	5	CACCAACCCTCCCATCGTGTTTGAC	7	+	717	753
ENSDARG00000006889	ENSDART00000002449	7	5	5	TACGGCATCATGACCGACGGGTAC	6	+	649	753
ENSDARG00000007107	ENSDART00000005252	7	1	1	CCCACCTAAAAAGCTTGTATTTGGA	7	-	292	1764
ENSDARG00000007107	ENSDART00000005252	7	1	1	AAAGCCTTAGGGCAATGGGGCTGGG	7	-	263	1764
ENSDARG00000007107	ENSDART00000005252	7	1	1	CACCTAAAAAGCTTGTATTTGGA	5	-	292	1764
ENSDARG00000007107	ENSDART00000005252	7	2	2	TACCCAACATATCTGGAGGTTCT	5	-	804	1764
ENSDARG00000007107	ENSDART00000005252	7	2	2	TCCAAACCCTCCTTGATGGGGGA	5	-	1336	1764
ENSDARG00000007107	ENSDART00000005252	7	2	2	TCCATCTCCACCTTCAGGGGCTTCT	7	-	1238	1764
ENSDARG00000007107	ENSDART00000005252	7	2	2	TTCCAAACCCTCCTTGATGGGGGA	6	-	1336	1764
ENSDARG00000007107	ENSDART00000005252	7	2	2	TTCGACAGCATGCGAAGATGCTGAC	7	-	1575	1764
ENSDARG00000007107	ENSDART00000005252	7	2	2	GTTCCAAACCCTCCTTGATGGGGGA	7	-	1336	1764
ENSDARG00000007107	ENSDART00000005252	7	2	2	GTATACCCAACATATCTGGAGGT	5	-	807	1764
ENSDARG00000007107	ENSDART00000005252	7	2	2	CCCATCCCCATGGCAGTAGGTAAC	6	-	1029	1764
ENSDARG00000007107	ENSDART00000005252	7	2	2	AAACCCTCCTTGATGGGGGAAGCT	6	-	1332	1764
ENSDARG00000007107	ENSDART00000005252	7	2	2	AAAGGCCTCTTTGTTGGGGTCGTG	6	-	409	1764
ENSDARG00000007107	ENSDART00000005252	7	2	2	AGCCCATCCCCATGGCAGTAGGT	5	-	1032	1764
ENSDARG00000007107	ENSDART00000005252	7	2	2	CAAACCCTCCTTGATGGGGGAAGCT	7	-	1332	1764
ENSDARG00000007107	ENSDART00000005252	7	2	2	CACTGCGGCGGTGGCTGTGGCAGCG	7	-	1605	1764
ENSDARG00000007141	ENSDART00000007913	7	4	4	TTACTCACCTGCCGTGTGGAGGTT	6	-	348	1281
ENSDARG00000007141	ENSDART00000007913	7	4	4	TTACTCACCTGCCGTGTGGAGGT	5	-	349	1281
ENSDARG00000007141	ENSDART00000007913	7	4	4	CTCACCTGCCGTGTGGAGGTTTTG	6	-	345	1281
ENSDARG00000007141	ENSDART00000007913	7	4	4	CTCACCTGCCGTGTGGAGGTTTT	5	-	346	1281
ENSDARG00000007141	ENSDART00000007913	7	8	8	CAACTCATCAATGAAGATGATGGA	6	-	814	1281
ENSDARG00000007141	ENSDART00000007913	7	8	8	ATCCAACTCATCAATGAAGATGAT	6	-	817	1281
ENSDARG00000007141	ENSDART00000007913	7	8	8	GAAGCCATCTAACTGATTGAGCA	5	-	911	1281
ENSDARG00000007141	ENSDART00000007913	7	8	8	AACTTCAAAAAGGTTGCCTGAGAA	6	-	702	1281
ENSDARG00000007141	ENSDART00000007913	7	9	9	AGCCTCCTCGTTGGGCATAGGGA	5	-	1034	1281
ENSDARG00000007199	ENSDART00000026820	7	1	1	GCAAACAAAAACTATTTTTTGTG	5	+	273	1608
ENSDARG00000007199	ENSDART00000026820	7	1	1	AACAAAAACTATTTTTTGTGACGTT	7	+	276	1608
ENSDARG00000007199	ENSDART00000026820	7	4	4	GCAAAAAGCAGCTGAGAAGCAGGC	6	+	768	1608
ENSDARG00000007199	ENSDART00000026820	7	4	4	AGCAAAAGCAAAAAGCAGCTGAG	5	+	761	1608
ENSDARG00000007199	ENSDART00000026820	7	7	7	CAAGCCACAGAAGGTGGGAGTGTTT	7	+	1428	1608
ENSDARG00000007199	ENSDART00000026820	7	7	7	CAAGCCACAGAAGGTGGGAGTGT	5	+	1428	1608
ENSDARG00000007199	ENSDART00000026820	7	7	7	AGCCACAGAAGGTGGGAGTGTTT	5	+	1430	1608
ENSDARG00000007199	ENSDART00000026820	7	7	7	AGACAAGCCACAGAAGGTGGGAGTG	7	+	1425	1608
ENSDARG00000007199	ENSDART00000026820	7	7	7	ACAAGCCACAGAAGGTGGGAGTGT	6	+	1427	1608
ENSDARG00000007199	ENSDART00000026820	7	7	7	ACAAGCCACAGAAGGTGGGAGTG	5	+	1427	1608
ENSDARG00000007199	ENSDART00000036921	7	3	3	GCAAAAAGCAGCTGAGAAGCAGGC	6	+	345	1185
ENSDARG00000007199	ENSDART00000036921	7	3	3	AGCAAAAGCAAAAAGCAGCTGAG	5	+	338	1185
ENSDARG00000007199	ENSDART00000036921	7	5	5	CAAATCTACTTTACTCTGGGTAA	5	+	598	1185
ENSDARG00000007199	ENSDART00000036921	7	6	6	AGACAAGCCACAGAAGGTGGGAGTG	7	+	993	1185
ENSDARG00000007199	ENSDART00000036921	7	6	6	ACAAGCCACAGAAGGTGGGAGTG	5	+	995	1185
ENSDARG00000007199	ENSDART00000036921	7	6	6	CAAGCCACAGAAGGTGGGAGTGTTT	7	+	996	1185
ENSDARG00000007199	ENSDART00000036921	7	6	6	CAAGCCACAGAAGGTGGGAGTGT	5	+	996	1185
ENSDARG00000007199	ENSDART00000036921	7	6	6	AGCCACAGAAGGTGGGAGTGTTT	5	+	998	1185
ENSDARG00000007199	ENSDART00000036921	7	6	6	ACAAGCCACAGAAGGTGGGAGTGT	6	+	995	1185
ENSDARG00000007199	ENSDART00000054450	7	1	1	AACAAAAACTATTTTTTGTGACGTT	7	+	276	1569
ENSDARG00000007199	ENSDART00000054450	7	1	1	GCAAACAAAAACTATTTTTTGTG	5	+	273	1569
ENSDARG00000007199	ENSDART00000054450	7	3	3	GCAAAAAGCAGCTGAGAAGCAGGC	6	+	771	1569
ENSDARG00000007199	ENSDART00000054450	7	3	3	AGCAAAAGCAAAAAGCAGCTGAG	5	+	764	1569
ENSDARG00000007199	ENSDART00000054450	7	6	6	CAAGCCACAGAAGGTGGGAGTGTTT	7	+	1455	1569
ENSDARG00000007199	ENSDART00000054450	7	6	6	CAAGCCACAGAAGGTGGGAGTGT	5	+	1455	1569
ENSDARG00000007199	ENSDART00000054450	7	6	6	AGCCACAGAAGGTGGGAGTGTTT	5	+	1457	1569
ENSDARG00000007199	ENSDART00000054450	7	6	6	AGACAAGCCACAGAAGGTGGGAGTG	7	+	1452	1569
ENSDARG00000007199	ENSDART00000054450	7	6	6	ACAAGCCACAGAAGGTGGGAGTGT	6	+	1454	1569
ENSDARG00000007199	ENSDART00000054450	7	6	6	ACAAGCCACAGAAGGTGGGAGTG	5	+	1454	1569
ENSDARG00000007199	ENSDART00000054451	7	1	1	GCAAACAAAAACTATTTTTTGTG	5	+	279	1590
ENSDARG00000007199	ENSDART00000054451	7	1	1	AACAAAAACTATTTTTTGTGACGTT	7	+	282	1590
ENSDARG00000007199	ENSDART00000054451	7	5	5	GCAAAAAGCAGCTGAGAAGCAGGC	6	+	753	1590
ENSDARG00000007199	ENSDART00000054451	7	5	5	AGCAAAAGCAAAAAGCAGCTGAG	5	+	746	1590
ENSDARG00000007199	ENSDART00000054451	7	7	7	ACAAGCCACAGAAGGTGGGAGTG	5	+	1403	1590
ENSDARG00000007199	ENSDART00000054451	7	7	7	CAAGCCACAGAAGGTGGGAGTGTTT	7	+	1404	1590
ENSDARG00000007199	ENSDART00000054451	7	7	7	CAAGCCACAGAAGGTGGGAGTGT	5	+	1404	1590
ENSDARG00000007199	ENSDART00000054451	7	7	7	AGCCACAGAAGGTGGGAGTGTTT	5	+	1406	1590
ENSDARG00000007199	ENSDART00000054451	7	7	7	AGACAAGCCACAGAAGGTGGGAGTG	7	+	1401	1590
ENSDARG00000007199	ENSDART00000054451	7	7	7	ACAAGCCACAGAAGGTGGGAGTGT	6	+	1403	1590
ENSDARG00000007199	ENSDART00000057257	7	1	1	AACAAAAACTATTTTTTGTGACGTT	7	+	276	1590
ENSDARG00000007199	ENSDART00000057257	7	1	1	GCAAACAAAAACTATTTTTTGTG	5	+	273	1590
ENSDARG00000007199	ENSDART00000057257	7	5	5	GCAAAAAGCAGCTGAGAAGCAGGC	6	+	771	1590
ENSDARG00000007199	ENSDART00000057257	7	5	5	AGCAAAAGCAAAAAGCAGCTGAG	5	+	764	1590
ENSDARG00000007199	ENSDART00000057257	7	9	9	CAAGCCACAGAAGGTGGGAGTGTTT	7	+	1470	1590
ENSDARG00000007199	ENSDART00000057257	7	9	9	CAAGCCACAGAAGGTGGGAGTGT	5	+	1470	1590
ENSDARG00000007199	ENSDART00000057257	7	9	9	AGCCACAGAAGGTGGGAGTGTTT	5	+	1472	1590
ENSDARG00000007199	ENSDART00000057257	7	9	9	AGACAAGCCACAGAAGGTGGGAGTG	7	+	1467	1590
ENSDARG00000007199	ENSDART00000057257	7	9	9	ACAAGCCACAGAAGGTGGGAGTGT	6	+	1469	1590
ENSDARG00000007199	ENSDART00000057257	7	9	9	ACAAGCCACAGAAGGTGGGAGTG	5	+	1469	1590
ENSDARG00000007199	ENSDART00000073481	7	1	1	GCAAACAAAAACTATTTTTTGTG	5	+	237	1530
ENSDARG00000007199	ENSDART00000073481	7	1	1	AACAAAAACTATTTTTTGTGACGTT	7	+	240	1530
ENSDARG00000007199	ENSDART00000073481	7	4	4	AGCAAAAGCAAAAAGCAGCTGAG	5	+	722	1530
ENSDARG00000007199	ENSDART00000073481	7	4	4	GCAAAAAGCAGCTGAGAAGCAGGC	6	+	729	1530
ENSDARG00000007199	ENSDART00000073481	7	8	8	ACAAGCCACAGAAGGTGGGAGTG	5	+	1454	1530
ENSDARG00000007199	ENSDART00000073481	7	8	8	CAAGCCACAGAAGGTGGGAGTGTTT	7	+	1455	1530
ENSDARG00000007199	ENSDART00000073481	7	8	8	CAAGCCACAGAAGGTGGGAGTGT	5	+	1455	1530
ENSDARG00000007199	ENSDART00000073481	7	8	8	AGCCACAGAAGGTGGGAGTGTTT	5	+	1457	1530
ENSDARG00000007199	ENSDART00000073481	7	8	8	AGACAAGCCACAGAAGGTGGGAGTG	7	+	1452	1530
ENSDARG00000007199	ENSDART00000073481	7	8	8	ACAAGCCACAGAAGGTGGGAGTGT	6	+	1454	1530
ENSDARG00000007199	ENSDART00000073482	7	1	1	AACAAAAACTATTTTTTGTGACGTT	7	+	267	1686
ENSDARG00000007199	ENSDART00000073482	7	1	1	GCAAACAAAAACTATTTTTTGTG	5	+	264	1686
ENSDARG00000007199	ENSDART00000073482	7	4	4	GCAAAAAGCAGCTGAGAAGCAGGC	6	+	759	1686
ENSDARG00000007199	ENSDART00000073482	7	4	4	AGCAAAAGCAAAAAGCAGCTGAG	5	+	752	1686
ENSDARG00000007199	ENSDART00000073482	7	7	7	GTAATCAACAAGTGAATGTGTCGTG	7	+	1094	1686
ENSDARG00000007199	ENSDART00000073482	7	9	9	AGACAAGCCACAGAAGGTGGGAGTG	7	+	1527	1686
ENSDARG00000007199	ENSDART00000073482	7	9	9	ACAAGCCACAGAAGGTGGGAGTG	5	+	1529	1686
ENSDARG00000007199	ENSDART00000073482	7	9	9	ACAAGCCACAGAAGGTGGGAGTGT	6	+	1529	1686
ENSDARG00000007199	ENSDART00000073482	7	9	9	CAAGCCACAGAAGGTGGGAGTGTTT	7	+	1530	1686
ENSDARG00000007199	ENSDART00000073482	7	9	9	CAAGCCACAGAAGGTGGGAGTGT	5	+	1530	1686
ENSDARG00000007199	ENSDART00000073482	7	9	9	AGCCACAGAAGGTGGGAGTGTTT	5	+	1532	1686
ENSDARG00000007199	ENSDART00000073484	7	1	1	AACAAAAACTATTTTTTGTGACGTT	7	+	276	1614
ENSDARG00000007199	ENSDART00000073484	7	1	1	GCAAACAAAAACTATTTTTTGTG	5	+	273	1614
ENSDARG00000007199	ENSDART00000073484	7	4	4	GCAAAAAGCAGCTGAGAAGCAGGC	6	+	774	1614
ENSDARG00000007199	ENSDART00000073484	7	4	4	AGCAAAAGCAAAAAGCAGCTGAG	5	+	767	1614
ENSDARG00000007199	ENSDART00000073484	7	6	6	CAAGCCACAGAAGGTGGGAGTGTTT	7	+	1425	1614
ENSDARG00000007199	ENSDART00000073484	7	6	6	CAAGCCACAGAAGGTGGGAGTGT	5	+	1425	1614
ENSDARG00000007199	ENSDART00000073484	7	6	6	AGCCACAGAAGGTGGGAGTGTTT	5	+	1427	1614
ENSDARG00000007199	ENSDART00000073484	7	6	6	AGACAAGCCACAGAAGGTGGGAGTG	7	+	1422	1614
ENSDARG00000007199	ENSDART00000073484	7	6	6	ACAAGCCACAGAAGGTGGGAGTGT	6	+	1424	1614
ENSDARG00000007199	ENSDART00000073484	7	6	6	ACAAGCCACAGAAGGTGGGAGTG	5	+	1424	1614
ENSDARG00000007366	ENSDART00000021947	7	1	1	TTAGTCTAACTTCGTCGCGGTGTTG	7	-	25	1341
ENSDARG00000007366	ENSDART00000021947	7	1	1	TCCAGCACAGCCAGAGTCTGCATCT	7	-	143	1341
ENSDARG00000007366	ENSDART00000021947	7	1	1	GTTTGCAGACATTGTTAGTCTAA	5	-	41	1341
ENSDARG00000007366	ENSDART00000021947	7	1	1	AACTTCGTCGCGGTGTTGCAGAG	5	-	20	1341
ENSDARG00000007366	ENSDART00000021947	7	1	1	ACAAACTAACACTAGCTGTGTTGCA	7	-	87	1341
ENSDARG00000007366	ENSDART00000021947	7	1	1	ACAAACTAACACTAGCTGTGTTG	5	-	89	1341
ENSDARG00000007366	ENSDART00000021947	7	3	3	TCCAGCCCACACTGGATGCGTGTGT	7	-	312	1341
ENSDARG00000007366	ENSDART00000021947	7	3	3	TCCAGCCCACACTGGATGCGTGT	5	-	314	1341
ENSDARG00000007366	ENSDART00000021947	7	4	4	TTCAAAGCAGCCAACAGATGCTGTT	7	-	446	1341
ENSDARG00000007366	ENSDART00000021947	7	4	4	TGCACCTCCATATATGTGGCGCC	5	-	370	1341
ENSDARG00000007366	ENSDART00000021947	7	4	4	CAAAGCAGCCAACAGATGCTGTT	5	-	446	1341
ENSDARG00000007366	ENSDART00000021947	7	4	4	GGCAACGACTTTCTTGCCGAATTG	6	-	573	1341
ENSDARG00000007366	ENSDART00000021947	7	5	5	CACTGCAACAATGTCCTTAGTGGCT	7	-	660	1341
ENSDARG00000007366	ENSDART00000021947	7	5	5	TTCATCGCCATGAAAGTTGATGTT	6	-	820	1341
ENSDARG00000007366	ENSDART00000021947	7	8	8	GTAGGCTGCATTTATGGTGCTTGC	6	-	1147	1341
ENSDARG00000007370	ENSDART00000040115	7	2	2	AAACGCACCCCAGTGCTGTTTCT	5	-	187	4533
ENSDARG00000007370	ENSDART00000040115	7	3	3	TCCAGCTCCACCGGTGTGTGCTGGG	7	-	281	4533
ENSDARG00000007370	ENSDART00000040115	7	3	3	AGCTCCACCGGTGTGTGCTGGGCC	6	-	279	4533
ENSDARG00000007370	ENSDART00000040115	7	3	3	GGCGTCATCCCTGGAGGAGGGATGT	7	-	227	4533
ENSDARG00000007370	ENSDART00000040115	7	5	5	TCCTCCAACTGTGACTTTGACGAC	6	-	505	4533
ENSDARG00000007370	ENSDART00000040115	7	6	6	CTCATCAAAAAGATCTGAAGGTTTC	7	-	603	4533
ENSDARG00000007370	ENSDART00000040115	7	18	18	ATCGTCCACATCTTGAAGGAGAG	5	-	1559	4533
ENSDARG00000007370	ENSDART00000040115	7	18	18	AGAGGCAAACAGGTGTTGTCGAA	5	-	1624	4533
ENSDARG00000007370	ENSDART00000040115	7	19	19	CTATGCTAAGCAGCATGTTGAGGG	6	-	1775	4533
ENSDARG00000007370	ENSDART00000040115	7	19	19	CTATGCTAAGCAGCATGTTGAGGGC	7	-	1774	4533
ENSDARG00000007370	ENSDART00000040115	7	21	21	GCCGCCTGCACTATCTGCTGCATGT	7	-	1997	4533
ENSDARG00000007370	ENSDART00000040115	7	21	21	CTCCTCAGAGAGGTAGCGTAGTCT	6	-	2092	4533
ENSDARG00000007370	ENSDART00000040115	7	21	21	TTCACCTCCTCAGAGAGGTAGCG	5	-	2098	4533
ENSDARG00000007370	ENSDART00000040115	7	21	21	CACCTCCTCAGAGAGGTAGCGTAG	6	-	2095	4533
ENSDARG00000007370	ENSDART00000040115	7	23	23	TTCTGCAAACACTGAGAGTTTGCC	6	-	2368	4533
ENSDARG00000007370	ENSDART00000040115	7	24	24	TTCCCCACCAGAGCCAGTTTAGTCT	7	-	2405	4533
ENSDARG00000007370	ENSDART00000040115	7	24	24	CCCAGCTCCAGCCTGAAGAGGGT	5	-	2508	4533
ENSDARG00000007370	ENSDART00000040115	7	24	24	AGCTCCAGCCTGAAGAGGGTTTGAA	7	-	2503	4533
ENSDARG00000007370	ENSDART00000040115	7	24	24	AGCTCCAGCCTGAAGAGGGTTTG	5	-	2505	4533
ENSDARG00000007370	ENSDART00000040115	7	24	24	TCCCCACCAGAGCCAGTTTAGTCT	6	-	2405	4533
ENSDARG00000007370	ENSDART00000040115	7	27	27	GTCTCCGACGGTTGGTATGGTAC	5	-	2850	4533
ENSDARG00000007370	ENSDART00000040115	7	28	28	TTCGACGTCTCCAGCGCCGGCGAC	6	-	3020	4533
ENSDARG00000007370	ENSDART00000040115	7	28	28	GCCGGCGACGGAACAAGTCGGTTTT	7	-	3004	4533
ENSDARG00000007370	ENSDART00000040115	7	28	28	GACGTCTCCAGCGCCGGCGACGGA	6	-	3017	4533
ENSDARG00000007370	ENSDART00000040115	7	28	28	CTCCAAGGCAAAGATGGCCGCCGGC	7	-	3066	4533
ENSDARG00000007370	ENSDART00000040115	7	33	33	AGCTCCACCACAATGTTTGGAGGG	6	-	3417	4533
ENSDARG00000007370	ENSDART00000040115	7	33	33	GTCACCGTCTTCTGACTCTGATGAA	7	-	3302	4533
ENSDARG00000007370	ENSDART00000040115	7	33	33	TACAGCTCCACCACAATGTTTGGAG	7	-	3419	4533
ENSDARG00000007370	ENSDART00000040115	7	33	33	ACCGTCTTCTGACTCTGATGAAGGA	7	-	3299	4533
ENSDARG00000007370	ENSDART00000040115	7	35	35	GGCTCCCTCTGAGGTGGTGGATAG	6	-	3621	4533
ENSDARG00000007370	ENSDART00000040115	7	36	36	ACATTCCACCTGAAGACTGGGAG	5	-	3758	4533
ENSDARG00000007370	ENSDART00000040115	7	45	45	CCCAAAAGCCTGGATGATGTAGAT	6	-	4450	4533
ENSDARG00000007370	ENSDART00000040115	7	45	45	AACCCAAAAGCCTGGATGATGTA	5	-	4453	4533
ENSDARG00000007370	ENSDART00000082620	7	4	4	AAACGCACCCCAGTGCTGTTTCT	5	-	343	6231
ENSDARG00000007370	ENSDART00000082620	7	5	5	GGCGTCATCCCTGGAGGAGGGATGT	7	-	383	6231
ENSDARG00000007370	ENSDART00000082620	7	5	5	AGCTCCACCGGTGTGTGCTGGGCC	6	-	435	6231
ENSDARG00000007370	ENSDART00000082620	7	5	5	TCCAGCTCCACCGGTGTGTGCTGGG	7	-	437	6231
ENSDARG00000007370	ENSDART00000082620	7	7	7	TCCTCCAACTGTGACTTTGACGAC	6	-	751	6231
ENSDARG00000007370	ENSDART00000082620	7	7	7	GTAAAACACAATTAATAAGCTTTT	6	-	871	6231
ENSDARG00000007370	ENSDART00000082620	7	19	19	ATCGTCCACATCTTGAAGGAGAG	5	-	1835	6231
ENSDARG00000007370	ENSDART00000082620	7	19	19	AGAGGCAAACAGGTGTTGTCGAA	5	-	1900	6231
ENSDARG00000007370	ENSDART00000082620	7	20	20	CTATGCTAAGCAGCATGTTGAGGGC	7	-	2050	6231
ENSDARG00000007370	ENSDART00000082620	7	20	20	CTATGCTAAGCAGCATGTTGAGGG	6	-	2051	6231
ENSDARG00000007370	ENSDART00000082620	7	22	22	CTCCTCAGAGAGGTAGCGTAGTCT	6	-	2365	6231
ENSDARG00000007370	ENSDART00000082620	7	22	22	GCCGCCTGCACTATCTGCTGCATGT	7	-	2270	6231
ENSDARG00000007370	ENSDART00000082620	7	22	22	CACCTCCTCAGAGAGGTAGCGTAG	6	-	2368	6231
ENSDARG00000007370	ENSDART00000082620	7	22	22	TTCACCTCCTCAGAGAGGTAGCG	5	-	2371	6231
ENSDARG00000007370	ENSDART00000082620	7	24	24	TTCTGCAAACACTGAGAGTTTGCC	6	-	2641	6231
ENSDARG00000007370	ENSDART00000082620	7	25	25	AGCTCCAGCCTGAAGAGGGTTTGAA	7	-	2776	6231
ENSDARG00000007370	ENSDART00000082620	7	25	25	TTCCCCACCAGAGCCAGTTTAGTCT	7	-	2678	6231
ENSDARG00000007370	ENSDART00000082620	7	25	25	CCCAGCTCCAGCCTGAAGAGGGT	5	-	2781	6231
ENSDARG00000007370	ENSDART00000082620	7	25	25	AGCTCCAGCCTGAAGAGGGTTTG	5	-	2778	6231
ENSDARG00000007370	ENSDART00000082620	7	25	25	TCCCCACCAGAGCCAGTTTAGTCT	6	-	2678	6231
ENSDARG00000007370	ENSDART00000082620	7	28	28	GTCTCCGACGGTTGGTATGGTAC	5	-	3123	6231
ENSDARG00000007370	ENSDART00000082620	7	29	29	GCCGGCGACGGAACAAGTCGGTTTT	7	-	3277	6231
ENSDARG00000007370	ENSDART00000082620	7	29	29	GACGTCTCCAGCGCCGGCGACGGA	6	-	3290	6231
ENSDARG00000007370	ENSDART00000082620	7	29	29	TTCGACGTCTCCAGCGCCGGCGAC	6	-	3293	6231
ENSDARG00000007370	ENSDART00000082620	7	29	29	CTCCAAGGCAAAGATGGCCGCCGGC	7	-	3339	6231
ENSDARG00000007370	ENSDART00000082620	7	32	32	AGCTCCACCACAATGTTTGGAGGG	6	-	3681	6231
ENSDARG00000007370	ENSDART00000082620	7	32	32	ACCGTCTTCTGACTCTGATGAAGGA	7	-	3563	6231
ENSDARG00000007370	ENSDART00000082620	7	32	32	TACAGCTCCACCACAATGTTTGGAG	7	-	3683	6231
ENSDARG00000007370	ENSDART00000082620	7	32	32	GTCACCGTCTTCTGACTCTGATGAA	7	-	3566	6231
ENSDARG00000007370	ENSDART00000082620	7	35	35	ACCTCATCCATGATATGTGAGGGT	6	-	3909	6231
ENSDARG00000007370	ENSDART00000082620	7	35	35	TACCTCATCCATGATATGTGAGGGT	7	-	3909	6231
ENSDARG00000007370	ENSDART00000082620	7	36	36	GGCTCCCTCTGAGGTGGTGGATAG	6	-	3951	6231
ENSDARG00000007370	ENSDART00000082620	7	37	37	ACATTCCACCTGAAGACTGGGAG	5	-	4088	6231
ENSDARG00000007370	ENSDART00000082620	7	39	39	AACATCATCTCTAGGTGTGTGAGCA	7	-	4353	6231
ENSDARG00000007370	ENSDART00000082620	7	39	39	GTACCATACATACTGTAAGTATAA	6	-	4308	6231
ENSDARG00000007370	ENSDART00000082620	7	42	42	CCCAAAAGCCTGGATGATGTAGAT	6	-	4753	6231
ENSDARG00000007370	ENSDART00000082620	7	42	42	AACCCAAAAGCCTGGATGATGTA	5	-	4756	6231
ENSDARG00000007370	ENSDART00000082620	7	45	45	CTCTCACACAGACGATGAAGTAGCT	7	-	5108	6231
ENSDARG00000007370	ENSDART00000082620	7	47	47	GTCCACCCACATTTGTAGTCGCC	5	-	5351	6231
ENSDARG00000007370	ENSDART00000082620	7	50	50	TCCCAAATCTGGATAGTAAGTTTAG	7	-	5720	6231
ENSDARG00000007370	ENSDART00000082620	7	51	51	TCCATCTCCAAAGAGCCTGAGAA	5	-	5770	6231
ENSDARG00000007370	ENSDART00000082620	7	51	51	AGACCACACTTCTCTGGAGACTTC	6	-	5817	6231
ENSDARG00000007370	ENSDART00000082620	7	51	51	CAAGACCACACTTCTCTGGAGAC	5	-	5820	6231
ENSDARG00000007370	ENSDART00000082620	7	53	53	AACGTCTTATATGGGGACGAGAAC	6	-	6084	6231
ENSDARG00000007370	ENSDART00000082620	7	53	53	CTAAACGTCTTATATGGGGACGAG	6	-	6087	6231
ENSDARG00000007370	ENSDART00000082620	7	54	54	ACCATCTTCATAGCAGCATAGTTC	6	-	6207	6231
ENSDARG00000007385	ENSDART00000006802	7	3	3	TCCTGCAGCCAAGACTCTGGTGGA	6	+	228	1641
ENSDARG00000007385	ENSDART00000006802	7	4	4	TACCACTTCAGTGACTCTGCTTGC	6	+	288	1641
ENSDARG00000007385	ENSDART00000006802	7	5	5	TTCTTCTCCAAGATGGTGGTGGAT	6	+	529	1641
ENSDARG00000007385	ENSDART00000006802	7	5	5	TTCTTCTCCAAGATGGTGGTGGA	5	+	529	1641
ENSDARG00000007385	ENSDART00000006802	7	6	6	GTTCGCGTCAACTCAGTGGAGGTC	6	+	772	1641
ENSDARG00000007385	ENSDART00000006802	7	6	6	TGCTCAACATTGAGCTGGAGTTGAA	7	+	725	1641
ENSDARG00000007385	ENSDART00000006802	7	7	7	CTATCAGGCCATTGTTGATGCTGAA	7	+	795	1641
ENSDARG00000007385	ENSDART00000006802	7	7	7	GTAGCCACACAGTACTTTGCAGAC	6	+	901	1641
ENSDARG00000007385	ENSDART00000006802	7	7	7	AGCTGCCCATTGGAGATGTAGCC	5	+	884	1641
ENSDARG00000007385	ENSDART00000006802	7	9	9	TGCACCATCATTCTGAGGGGTGGTG	7	+	1117	1641
ENSDARG00000007385	ENSDART00000006802	7	9	9	ACCTGCACCATCATTCTGAGGGG	5	+	1114	1641
ENSDARG00000007385	ENSDART00000006802	7	11	11	GCCTCATACTGTCAGTGGATGAG	5	+	1541	1641
ENSDARG00000007385	ENSDART00000006802	7	11	11	GGCAGCTGCTGGCAGAGGAAGGG	5	+	1602	1641
ENSDARG00000007385	ENSDART00000006802	7	11	11	GCCTCATACTGTCAGTGGATGAGAC	7	+	1541	1641
ENSDARG00000007385	ENSDART00000006802	7	11	11	ACCGGCAGCTGCTGGCAGAGGAA	5	+	1599	1641
ENSDARG00000007385	ENSDART00000006802	7	11	11	GACTGCTGCATCTGAAGCTGCATGC	7	+	1518	1641
ENSDARG00000007385	ENSDART00000014899	7	1	1	CTATTCCGCAATCATGATGGTGAG	6	+	12	1266
ENSDARG00000007385	ENSDART00000014899	7	3	3	TCCTGCAGCCAAGACTCTGGTGGA	6	+	243	1266
ENSDARG00000007385	ENSDART00000014899	7	4	4	TACCACTTCAGTGACTCTGCTTGC	6	+	303	1266
ENSDARG00000007385	ENSDART00000014899	7	5	5	TTCTTCTCCAAGATGGTGGTGGAT	6	+	544	1266
ENSDARG00000007385	ENSDART00000014899	7	5	5	TTCTTCTCCAAGATGGTGGTGGA	5	+	544	1266
ENSDARG00000007385	ENSDART00000014899	7	6	6	TGCTCAACATTGAGCTGGAGTTGAA	7	+	740	1266
ENSDARG00000007385	ENSDART00000014899	7	9	9	GCCTCATACTGTCAGTGGATGAG	5	+	1166	1266
ENSDARG00000007385	ENSDART00000014899	7	9	9	GGCAGCTGCTGGCAGAGGAAGGG	5	+	1227	1266
ENSDARG00000007385	ENSDART00000014899	7	9	9	GCCTCATACTGTCAGTGGATGAGAC	7	+	1166	1266
ENSDARG00000007385	ENSDART00000014899	7	9	9	GACTGCTGCATCTGAAGCTGCATGC	7	+	1143	1266
ENSDARG00000007385	ENSDART00000014899	7	9	9	ACCGGCAGCTGCTGGCAGAGGAA	5	+	1224	1266
ENSDARG00000007526	ENSDART00000079762	7	3	2	TCCACCAGCACAGAAGGATTTGTC	6	+	20	1110
ENSDARG00000007526	ENSDART00000079762	7	8	7	CTATTCGCATTGATGAAGTTGAA	5	+	485	1110
ENSDARG00000007526	ENSDART00000079762	7	10	9	GACAAATACGATGAGGTGGAGTT	5	+	655	1110
ENSDARG00000007526	ENSDART00000079762	7	10	9	GACAAATACGATGAGGTGGAGTTT	6	+	655	1110
ENSDARG00000007526	ENSDART00000079762	7	11	10	CGCCAAAGAGATCTGAGATGAAGGT	7	+	824	1110
ENSDARG00000007526	ENSDART00000079762	7	12	11	ACATGCAGACGTCAATGGAGTCTCT	7	+	839	1110
ENSDARG00000007745	ENSDART00000006868	7	1	1	AGCTACAAATTATGCCGTGGCAGGT	7	+	57	819
ENSDARG00000007745	ENSDART00000006868	7	1	1	TCCTCCAGCCTGAACGGTGAGTTT	6	+	205	819
ENSDARG00000007745	ENSDART00000006868	7	1	1	GGCGTCGTCGTGAAGAGTGATAA	5	+	103	819
ENSDARG00000007745	ENSDART00000006868	7	1	1	GCAAGCTACAAATTATGCCGTGGCA	7	+	54	819
ENSDARG00000007745	ENSDART00000006868	7	2	2	TGCCTCAGCTGACGTTTTGGCTTT	6	+	429	819
ENSDARG00000007745	ENSDART00000006868	7	2	2	GTCTGCACCCATCTGGGCTGTGTGC	7	+	652	819
ENSDARG00000007745	ENSDART00000006868	7	2	2	GCCTTCTCCTATCTGATGACGGG	5	+	340	819
ENSDARG00000007745	ENSDART00000006868	7	2	2	GCAGTCGCAAGAGAGTGGTGATGCC	7	+	309	819
ENSDARG00000007745	ENSDART00000006868	7	2	2	GACTACCGCCGGCCAGAAGTTTTG	6	+	274	819
ENSDARG00000007745	ENSDART00000006868	7	2	2	GACGACACAGTGGTTGTAGGATAA	6	+	808	819
ENSDARG00000007745	ENSDART00000006868	7	2	2	CCCTGCTCCGCTCAATCTGGAGGT	6	+	762	819
ENSDARG00000007745	ENSDART00000006868	7	2	2	CACGACAAAGACCGTGTTGTGAAC	6	+	604	819
ENSDARG00000007745	ENSDART00000006868	7	2	2	ACCGCCGGCCAGAAGTTTTGAAC	5	+	278	819
[truncated: 15,229 more rows]
