# Supplementary material for: Rapid Mutation of Endogenous Zebrafish Genes Using Zinc Finger Nucleases Made by Oligomerized Pool ENgineering (OPEN)
Source: PLoS One. 2009 Feb 9;4(2):e4348. doi: 10.1371/journal.pone.0004348 (PMC2634973; doi:10.1371/journal.pone.0004348)
Supplement: Table S8 — Potential OPEN ZFN target sites in gene transcripts encoded on zebrafish chromosome 8. Data presented as described in the legend to Table S1. (2.44 MB XLS) [file pone.0004348.s008.xls]

## Sheet: Chromosome8
Gene ID	Transcript ID	Chromosome Number	Exon Number	Coding Exon Number	TargetSite	ZFN Spacer Length	Strand	ZFN Cleavage Site	Coding Sequence Length
ENSDARG00000000384	ENSDART00000034612	8	4	1	GGCTCAGCCCTCTGTGGACGTGGAC	7	+	25	852
ENSDARG00000000384	ENSDART00000034612	8	5	2	AAAGCCCACTGTTCTGGATGGTGC	6	+	75	852
ENSDARG00000000384	ENSDART00000034612	8	5	2	AAAGCCCACTGTTCTGGATGGTGCT	7	+	75	852
ENSDARG00000000384	ENSDART00000034612	8	5	2	CAAAGCCCACTGTTCTGGATGGTGC	7	+	74	852
ENSDARG00000000384	ENSDART00000034612	8	6	3	GCCTGCTGCCCTCGTCTCTGAAGAG	7	+	323	852
ENSDARG00000000384	ENSDART00000034612	8	8	5	AAAGCCATCGGGTGGATGTCTTC	5	+	676	852
ENSDARG00000000384	ENSDART00000034612	8	8	5	CTCAAAGCCATCGGGTGGATGTC	5	+	673	852
ENSDARG00000000384	ENSDART00000034612	8	9	6	TTCCTCATCGTGTCTGTGAAGTA	5	+	787	852
ENSDARG00000000384	ENSDART00000061691	8	1	1	ACCTGCGTCAATCGGCCGTCGTA	5	+	238	1503
ENSDARG00000000384	ENSDART00000061691	8	2	2	GGCTCAGCCCTCTGTGGACGTGGAC	7	+	598	1503
ENSDARG00000000384	ENSDART00000061691	8	2	2	GGCTACATCATCCCTGCCGTCTGC	6	+	478	1503
ENSDARG00000000384	ENSDART00000061691	8	2	2	ACATCCAGCAGAACATTAGCTTCT	6	+	449	1503
ENSDARG00000000384	ENSDART00000061691	8	2	2	ACATCATCCCTGCCGTCTGCCTTG	6	+	482	1503
ENSDARG00000000384	ENSDART00000061691	8	2	2	TACATCATCCCTGCCGTCTGCCTTG	7	+	481	1503
ENSDARG00000000384	ENSDART00000061691	8	3	3	CAAAGCCCACTGTTCTGGATGGTGC	7	+	647	1503
ENSDARG00000000384	ENSDART00000061691	8	3	3	AAAGCCCACTGTTCTGGATGGTGC	6	+	648	1503
ENSDARG00000000384	ENSDART00000061691	8	3	3	AAAGCCCACTGTTCTGGATGGTGCT	7	+	648	1503
ENSDARG00000000384	ENSDART00000061691	8	5	5	GCCTGCTGCCCTCGTCTCTGAAGAG	7	+	974	1503
ENSDARG00000000384	ENSDART00000061691	8	7	7	CTCAAAGCCATCGGGTGGATGTC	5	+	1324	1503
ENSDARG00000000384	ENSDART00000061691	8	7	7	AAAGCCATCGGGTGGATGTCTTC	5	+	1327	1503
ENSDARG00000000384	ENSDART00000061691	8	8	8	TTCCTCATCGTGTCTGTGAAGTA	5	+	1438	1503
ENSDARG00000000384	ENSDART00000076101	8	1	1	AGCAGCCCCTTCTATTGGGAGGGC	6	+	187	1299
ENSDARG00000000384	ENSDART00000076101	8	2	2	ACCTGCGTCAATCGGCCGTCGTA	5	+	412	1299
ENSDARG00000000384	ENSDART00000076101	8	3	3	GGCTCAGCCCTCTGTGGACGTGGAC	7	+	772	1299
ENSDARG00000000384	ENSDART00000076101	8	3	3	GGCTACATCATCCCTGCCGTCTGC	6	+	652	1299
ENSDARG00000000384	ENSDART00000076101	8	3	3	TACATCATCCCTGCCGTCTGCCTTG	7	+	655	1299
ENSDARG00000000384	ENSDART00000076101	8	3	3	ACATCCAGCAGAACATTAGCTTCT	6	+	623	1299
ENSDARG00000000384	ENSDART00000076101	8	3	3	ACATCATCCCTGCCGTCTGCCTTG	6	+	656	1299
ENSDARG00000000384	ENSDART00000076101	8	4	4	CAAAGCCCACTGTTCTGGATGGTGC	7	+	821	1299
ENSDARG00000000384	ENSDART00000076101	8	4	4	AAAGCCCACTGTTCTGGATGGTGCT	7	+	822	1299
ENSDARG00000000384	ENSDART00000076101	8	4	4	AAAGCCCACTGTTCTGGATGGTGC	6	+	822	1299
ENSDARG00000000573	ENSDART00000000148	8	2	2	AACTTCCCCACAGAGCTGTTGAA	5	-	178	762
ENSDARG00000000573	ENSDART00000000148	8	3	3	CAACACAGCTGGATGTCTGCCTTC	6	-	382	762
ENSDARG00000000573	ENSDART00000000148	8	3	3	CACAGCAACACAGCTGGATGTCTGC	7	-	386	762
ENSDARG00000000573	ENSDART00000000148	8	3	3	CTCTCCAGATTTAGGGGTGTATTC	6	-	544	762
ENSDARG00000000573	ENSDART00000030098	8	2	2	AACTTCCCCACAGAGCTGTTGAA	5	-	178	750
ENSDARG00000000573	ENSDART00000030098	8	3	3	CAACACAGCTGGATGTCTGCCTTC	6	-	382	750
ENSDARG00000000573	ENSDART00000030098	8	3	3	CACAGCAACACAGCTGGATGTCTGC	7	-	386	750
ENSDARG00000000573	ENSDART00000030098	8	3	3	CTCTCCAGATTTAGGGGTGTATTC	6	-	544	750
ENSDARG00000000573	ENSDART00000098708	8	3	3	AACTTCCCCACAGAGCTGTTGAA	5	-	190	762
ENSDARG00000000573	ENSDART00000098708	8	4	4	CTCTCCAGATTTAGGGGTGTATTC	6	-	556	762
ENSDARG00000000573	ENSDART00000098708	8	4	4	CACAGCAACACAGCTGGATGTCTGC	7	-	398	762
ENSDARG00000000573	ENSDART00000098708	8	4	4	CAACACAGCTGGATGTCTGCCTTC	6	-	394	762
ENSDARG00000000690	ENSDART00000000744	8	3	2	TCCTTCAGCTACCCTTTTAGGTA	5	+	181	699
ENSDARG00000000690	ENSDART00000000744	8	4	3	AGACCATTCATCATCAGCTGAGTTC	7	+	279	699
ENSDARG00000000690	ENSDART00000000744	8	4	3	ATCATCAGCTGAGTTCTTTGTTGCT	7	+	288	699
ENSDARG00000000690	ENSDART00000000744	8	4	3	TACAAAGTCCCAACCTGCGAAGCC	6	+	220	699
ENSDARG00000000690	ENSDART00000000744	8	5	4	ACACACGCCGCTGATGGGCCGCC	5	+	564	699
ENSDARG00000000690	ENSDART00000000744	8	5	4	ACATTCATCTGGCTGGTTTGTTC	5	+	433	699
ENSDARG00000000690	ENSDART00000000744	8	6	5	TTCCTCAACCTTATCCTGTGGGGAG	7	+	610	699
ENSDARG00000000690	ENSDART00000000744	8	6	5	TCCTCAACCTTATCCTGTGGGGAG	6	+	611	699
ENSDARG00000000690	ENSDART00000000744	8	6	5	CAACCAATCAACAAGAAGGAGCA	5	+	677	699
ENSDARG00000000857	ENSDART00000037109	8	3	3	GAAATCCTCGGCTCTGATGATGAA	6	+	151	1899
ENSDARG00000000857	ENSDART00000037109	8	3	3	ATCCTCGGCTCTGATGATGAAGAA	6	+	154	1899
ENSDARG00000000857	ENSDART00000037109	8	10	10	AGAAGCTAAAGAAGAAGCAGAAGCG	7	+	818	1899
ENSDARG00000000857	ENSDART00000037109	8	11	11	GTAAAACACAGCCTGAGGAGGAC	5	+	1076	1899
ENSDARG00000000857	ENSDART00000037109	8	11	11	AGCAACATCAGCAAAAGACTAGAAC	7	+	1292	1899
ENSDARG00000000857	ENSDART00000037109	8	11	11	ACCTCAGGCCAAGAGCAGCTGGA	5	+	1246	1899
ENSDARG00000000857	ENSDART00000037109	8	11	11	AAACACAGCCTGAGGAGGACGAG	5	+	1079	1899
ENSDARG00000000857	ENSDART00000040362	8	3	3	ACCTGCCACAAGTCTGAAGGAGTT	6	+	285	1083
ENSDARG00000000857	ENSDART00000040362	8	3	3	TACACCTGCCACAAGTCTGAAGGA	6	+	282	1083
ENSDARG00000000857	ENSDART00000040362	8	9	9	TCCTTCCTCTCTAATAAGCAGGA	5	+	738	1083
ENSDARG00000000857	ENSDART00000040362	8	10	10	TTCCTCAGATGCCCAAGAGGAATTT	7	+	797	1083
ENSDARG00000000857	ENSDART00000040362	8	10	10	TGCCCAAGAGGAATTTTGCAGAT	5	+	806	1083
ENSDARG00000000857	ENSDART00000063162	8	3	3	ATCCTCGGCTCTGATGATGAAGAA	6	+	157	1902
ENSDARG00000000857	ENSDART00000063162	8	3	3	GAAATCCTCGGCTCTGATGATGAA	6	+	154	1902
ENSDARG00000000857	ENSDART00000063162	8	10	10	AGAAGCTAAAGAAGAAGCAGAAGCG	7	+	821	1902
ENSDARG00000000857	ENSDART00000063162	8	11	11	AAACACAGCCTGAGGAGGACGAG	5	+	1082	1902
ENSDARG00000000857	ENSDART00000063162	8	11	11	ACCTCAGGCCAAGAGCAGCTGGA	5	+	1249	1902
ENSDARG00000000857	ENSDART00000063162	8	11	11	AGCAACATCAGCAAAAGACTAGAAC	7	+	1295	1902
ENSDARG00000000857	ENSDART00000063162	8	11	11	GTAAAACACAGCCTGAGGAGGAC	5	+	1079	1902
ENSDARG00000000857	ENSDART00000099706	8	3	3	TACACCTGCCACAAGTCTGAAGGA	6	+	282	1044
ENSDARG00000000857	ENSDART00000099706	8	3	3	ACCTGCCACAAGTCTGAAGGAGTT	6	+	285	1044
ENSDARG00000000857	ENSDART00000099706	8	9	9	TCCTTCCTCTCTAATAAGCAGGA	5	+	738	1044
ENSDARG00000000857	ENSDART00000099706	8	10	10	TGCCCAAGAGGAATTTTGCAGAT	5	+	806	1044
ENSDARG00000000857	ENSDART00000099706	8	10	10	TTCCTCAGATGCCCAAGAGGAATTT	7	+	797	1044
ENSDARG00000000857	ENSDART00000099708	8	3	3	ACCTGCCACAAGTCTGAAGGAGTT	6	+	285	1083
ENSDARG00000000857	ENSDART00000099708	8	3	3	TACACCTGCCACAAGTCTGAAGGA	6	+	282	1083
ENSDARG00000000857	ENSDART00000099708	8	9	9	CTAGACATCGATCAGTTGAAGCT	5	+	691	1083
ENSDARG00000000857	ENSDART00000099708	8	9	9	AGCTCATTATGCTTTTGGTTGGGAC	7	+	710	1083
ENSDARG00000000857	ENSDART00000099708	8	9	9	AGCTCATTATGCTTTTGGTTGGGA	6	+	710	1083
ENSDARG00000000857	ENSDART00000099708	8	10	10	TTCCTCAGATGCCCAAGAGGAATTT	7	+	797	1083
ENSDARG00000000857	ENSDART00000099708	8	10	10	TGCCCAAGAGGAATTTTGCAGAT	5	+	806	1083
ENSDARG00000000966	ENSDART00000001092	8	1	1	CTCCCATGCTGTTTGATGCCGAA	5	+	47	5994
ENSDARG00000000966	ENSDART00000001092	8	1	1	TGCTGCAGAACTCTGAGAAGCAGAT	7	+	2	5994
ENSDARG00000000966	ENSDART00000001092	8	1	1	TTCATCAACATGAATGGGCTGAT	5	+	85	5994
ENSDARG00000000966	ENSDART00000001092	8	1	1	TTCCTCCCATGCTGTTTGATGCC	5	+	44	5994
ENSDARG00000000966	ENSDART00000001092	8	3	3	GTTCGCAGAAGCTACCGTCGCAGAG	7	+	307	5994
ENSDARG00000000966	ENSDART00000001092	8	3	3	CACCACAGACGGTGGCTGAGTGT	5	+	236	5994
ENSDARG00000000966	ENSDART00000001092	8	3	3	TTCTACTACCTGACTAAGAAGAA	5	+	265	5994
ENSDARG00000000966	ENSDART00000001092	8	3	3	AGAAGCTACCGTCGCAGAGGCAGGA	7	+	313	5994
ENSDARG00000000966	ENSDART00000001092	8	8	8	CGCTCCATCTGCTGCAGAGGAAGAG	7	+	891	5994
ENSDARG00000000966	ENSDART00000001092	8	8	8	TGCTGCAGAGGAAGAGGAGATGGA	6	+	900	5994
ENSDARG00000000966	ENSDART00000001092	8	8	8	TCCATCTGCTGCAGAGGAAGAGGAG	7	+	894	5994
ENSDARG00000000966	ENSDART00000001092	8	8	8	GAAAGCTCCTCAAAACGAAGAGGCC	7	+	864	5994
ENSDARG00000000966	ENSDART00000001092	8	9	9	CGCTTCAGAGTCAGCCGGAGAGGAT	7	+	1218	5994
ENSDARG00000000966	ENSDART00000001092	8	9	9	GAAGCCTCCTGCCCTGGAGGTGGA	6	+	1245	5994
ENSDARG00000000966	ENSDART00000001092	8	9	9	GAAGCCTCCTGCCCTGGAGGTGGAG	7	+	1245	5994
ENSDARG00000000966	ENSDART00000001092	8	9	9	GCCTCCTGCCCTGGAGGTGGAGGA	6	+	1248	5994
ENSDARG00000000966	ENSDART00000001092	8	9	9	GCCTCCTGCCCTGGAGGTGGAGGAG	7	+	1248	5994
ENSDARG00000000966	ENSDART00000001092	8	9	9	GGCAGCTGCAGAGACGGGGATGGA	6	+	1116	5994
ENSDARG00000000966	ENSDART00000001092	8	9	9	AGAAGCCTCCTGCCCTGGAGGTGGA	7	+	1244	5994
ENSDARG00000000966	ENSDART00000001092	8	9	9	TGCAGCGCCGATGAGGTGGAGGA	5	+	1345	5994
ENSDARG00000000966	ENSDART00000001092	8	9	9	AGCGCCACATGCAGCGCCGATGAG	6	+	1336	5994
ENSDARG00000000966	ENSDART00000001092	8	9	9	TGCAGCGCCGATGAGGTGGAGGAG	6	+	1345	5994
ENSDARG00000000966	ENSDART00000001092	8	9	9	ACATGCAGCGCCGATGAGGTGGAG	6	+	1342	5994
ENSDARG00000000966	ENSDART00000001092	8	10	10	CTCCTAGGCCCAGCTTGTTGAGTTT	7	+	1385	5994
ENSDARG00000000966	ENSDART00000001092	8	10	10	CTCCTAGGCCCAGCTTGTTGAGTT	6	+	1385	5994
ENSDARG00000000966	ENSDART00000001092	8	10	10	AGCTCAAGCAGAGAGCGGCCGCC	5	+	1463	5994
ENSDARG00000000966	ENSDART00000001092	8	10	10	CTAGGCCCAGCTTGTTGAGTTTTAG	7	+	1388	5994
ENSDARG00000000966	ENSDART00000001092	8	16	16	TCCTCCTCCTCTCAGGCTGAGAA	5	+	2206	5994
ENSDARG00000000966	ENSDART00000001092	8	16	16	CTCCTCCTCCTCTCAGGCTGAGAA	6	+	2205	5994
ENSDARG00000000966	ENSDART00000001092	8	18	18	GTCCCAGCCGAGAGAGAAGCAGAG	6	+	2423	5994
ENSDARG00000000966	ENSDART00000001092	8	19	19	TCCAAATTCTAAAGAAGAGGGTTGT	7	+	2517	5994
ENSDARG00000000966	ENSDART00000001092	8	19	19	AGAGACCCCCTATCTGAAGGTGAG	6	+	2617	5994
ENSDARG00000000966	ENSDART00000001092	8	21	21	GTCAGCGTCGGGAGGTTAAGCAGAT	7	+	2729	5994
ENSDARG00000000966	ENSDART00000001092	8	21	21	GTACCCACAGTCAAAGAGGGAGGG	6	+	2833	5994
ENSDARG00000000966	ENSDART00000001092	8	22	22	GGCTCATCCAAGCGGCATGATGT	5	+	2953	5994
ENSDARG00000000966	ENSDART00000001092	8	24	24	CTCAGCAGATGCACCAGTGGCCTGC	7	+	3620	5994
ENSDARG00000000966	ENSDART00000001092	8	27	27	CAATCCTTCTGTGCTGCGGTGAG	5	+	4227	5994
ENSDARG00000000966	ENSDART00000001092	8	27	27	CAACAATCCTTCTGTGCTGCGGTG	6	+	4224	5994
ENSDARG00000000966	ENSDART00000001092	8	28	28	GTTCCATCCAATCCCGTGGCGGGG	6	+	4553	5994
ENSDARG00000000966	ENSDART00000001092	8	28	28	GTTGGCGCCCGAAAGTGGCGGCG	5	+	4524	5994
ENSDARG00000000966	ENSDART00000001092	8	28	28	TGCATCAAATTTCTTGTGATGCG	5	+	4703	5994
ENSDARG00000000966	ENSDART00000001092	8	28	28	GTTGGCGCCCGAAAGTGGCGGCGGC	7	+	4524	5994
ENSDARG00000000966	ENSDART00000001092	8	28	28	GGCAAAAGCCATGGGCGAGGAGGTC	7	+	4363	5994
ENSDARG00000000966	ENSDART00000001092	8	28	28	GCAAAAGCCATGGGCGAGGAGGTC	6	+	4364	5994
ENSDARG00000000966	ENSDART00000001092	8	28	28	CCCACCTGCCCACAAGTCGAGGGC	6	+	4493	5994
ENSDARG00000000966	ENSDART00000001092	8	30	30	CACCCCAGAGGGCACTTCTGCAGAA	7	+	5067	5994
ENSDARG00000000966	ENSDART00000001092	8	30	30	AGCAAAACCAGATAGGAGGTCAAC	6	+	4937	5994
ENSDARG00000000966	ENSDART00000001092	8	30	30	AACCTCTCCAGTGAGTCTGGCTGC	6	+	5124	5994
ENSDARG00000000966	ENSDART00000001092	8	30	30	CACTTCTGCAGAAAGGGGCAGAG	5	+	5079	5994
ENSDARG00000000966	ENSDART00000001092	8	33	33	ACCAGCTTCAGCAGATGGGCGTTC	6	+	5595	5994
ENSDARG00000000966	ENSDART00000001092	8	34	34	CTCACCAACAGAGTGTGGGAGGAC	6	+	5770	5994
ENSDARG00000000966	ENSDART00000001092	8	34	34	CACTCACCAACAGAGTGTGGGAG	5	+	5768	5994
ENSDARG00000000966	ENSDART00000001092	8	34	34	CACTCACCAACAGAGTGTGGGAGGA	7	+	5768	5994
ENSDARG00000000966	ENSDART00000001092	8	34	34	CTCACCAACAGAGTGTGGGAGGA	5	+	5770	5994
ENSDARG00000000966	ENSDART00000001092	8	35	35	AACCCCGCACCTGGGAGGAAGAA	5	+	5933	5994
ENSDARG00000000966	ENSDART00000001092	8	35	35	TTCCCCAACACATCCTGGCGCTTCT	7	+	5886	5994
ENSDARG00000000966	ENSDART00000001092	8	35	35	ACCCAACCCCGCACCTGGGAGGAA	6	+	5929	5994
ENSDARG00000000966	ENSDART00000001092	8	35	35	TGCAACCCCCTGACCATGGGGATGC	7	+	5827	5994
ENSDARG00000000966	ENSDART00000001092	8	35	35	TCCCCAACACATCCTGGCGCTTCT	6	+	5887	5994
ENSDARG00000000966	ENSDART00000001092	8	35	35	CAACCCCGCACCTGGGAGGAAGAA	6	+	5932	5994
ENSDARG00000000966	ENSDART00000001092	8	35	35	CCCAACCCCGCACCTGGGAGGAA	5	+	5930	5994
ENSDARG00000000966	ENSDART00000001092	8	35	35	GCAACCCCCTGACCATGGGGATGCG	7	+	5828	5994
ENSDARG00000000966	ENSDART00000001092	8	35	35	GCAACCCCCTGACCATGGGGATGC	6	+	5828	5994
ENSDARG00000000966	ENSDART00000001092	8	35	35	GACCCAACCCCGCACCTGGGAGGAA	7	+	5928	5994
ENSDARG00000000966	ENSDART00000001092	8	35	35	CCCCAACACATCCTGGCGCTTCT	5	+	5888	5994
ENSDARG00000001154	ENSDART00000001313	8	2	2	GGCCGCACCTCAGAGAGGAAGGC	5	-	355	3498
ENSDARG00000001154	ENSDART00000001313	8	2	2	TTCCCCCTCAGTCATCTGCAGAG	5	-	266	3498
ENSDARG00000001154	ENSDART00000001313	8	2	2	CCCTCAGTCATCTGCAGAGGCCGGA	7	-	260	3498
ENSDARG00000001154	ENSDART00000001313	8	2	2	GTCATCTGCAGAGGCCGGATGAGCT	7	-	254	3498
ENSDARG00000001154	ENSDART00000001313	8	3	3	ACACACAGACGCACTTTGCCTGT	5	-	415	3498
ENSDARG00000001154	ENSDART00000001313	8	3	3	ACAGACGCACTTTGCCTGTGTATCT	7	-	409	3498
ENSDARG00000001154	ENSDART00000001313	8	3	3	CAACACACAGACGCACTTTGCCTGT	7	-	415	3498
ENSDARG00000001154	ENSDART00000001313	8	4	4	TACTTCCCAGCCACCAGGGGGAGCT	7	-	491	3498
ENSDARG00000001154	ENSDART00000001313	8	5	5	GACAAAGTCTACAAAGTTGGAGGG	6	-	592	3498
ENSDARG00000001154	ENSDART00000001313	8	5	5	GTCTTCTCCGATCTCGTCGATGTT	6	-	874	3498
ENSDARG00000001154	ENSDART00000001313	8	5	5	GTTCTCCACACGAAGGTAATAGGGC	7	-	1191	3498
ENSDARG00000001154	ENSDART00000001313	8	5	5	TCCAGCTTCTCTGAGAGCAGCGTGC	7	-	722	3498
ENSDARG00000001154	ENSDART00000001313	8	5	5	TTACGCCACTGCTGCTGCTGGTGCC	7	-	772	3498
ENSDARG00000001154	ENSDART00000001313	8	5	5	TTCCCCACCAGAAGTGTGCAGCG	5	-	1153	3498
ENSDARG00000001154	ENSDART00000001313	8	5	5	TTCTCCACACGAAGGTAATAGGGC	6	-	1191	3498
ENSDARG00000001154	ENSDART00000001313	8	5	5	CTCGGCAGACGCTTGAGTGATGT	5	-	1214	3498
ENSDARG00000001154	ENSDART00000001313	8	5	5	AAAGTCTACAAAGTTGGAGGGAAC	6	-	589	3498
ENSDARG00000001154	ENSDART00000001313	8	5	5	AGCTGCTTACGCCACTGCTGCTGCT	7	-	778	3498
ENSDARG00000001154	ENSDART00000001313	8	5	5	ACCAGCACATTGTAGCCGCTGAT	5	-	997	3498
ENSDARG00000001154	ENSDART00000001313	8	5	5	CCCACCGGCTGGCTGTGTGCAGAA	6	-	1447	3498
ENSDARG00000001154	ENSDART00000001313	8	7	7	TCCTGCGACTCTCCTTGTGCTGAT	6	-	1713	3498
ENSDARG00000001154	ENSDART00000001313	8	8	8	CCCTTCCTCTTCCTCATCTGAGTTT	7	-	1821	3498
ENSDARG00000001154	ENSDART00000001313	8	9	9	GTTCCATACCTTTAGCGTGTTGTGT	7	-	2061	3498
ENSDARG00000001154	ENSDART00000001313	8	10	10	TGCCCCCCATGTAAGAGTGGTAGCC	7	-	2497	3498
ENSDARG00000001154	ENSDART00000001313	8	10	10	TGCTGCTCCAGCATGGCGGACGCT	6	-	2390	3498
ENSDARG00000001154	ENSDART00000001313	8	10	10	TGCCCCCCATGTAAGAGTGGTAG	5	-	2499	3498
ENSDARG00000001154	ENSDART00000001313	8	10	10	ACCCTCCTCCTCACTGCCGCAGTC	6	-	2455	3498
ENSDARG00000001154	ENSDART00000001313	8	10	10	AGAACCCACACGCAGTGGGCTGC	5	-	2519	3498
ENSDARG00000001154	ENSDART00000001313	8	10	10	AGAACCCACACGCAGTGGGCTGCC	6	-	2518	3498
ENSDARG00000001154	ENSDART00000001313	8	10	10	GAACCCACACGCAGTGGGCTGCC	5	-	2518	3498
ENSDARG00000001154	ENSDART00000001313	8	10	10	CTCCTCCTCACTGCCGCAGTCTAG	6	-	2452	3498
ENSDARG00000001154	ENSDART00000001313	8	10	10	CCCTCCTCCTCACTGCCGCAGTC	5	-	2455	3498
ENSDARG00000001154	ENSDART00000001313	8	10	10	CTCTGCAACCTCCGGGATGCTGTG	6	-	2176	3498
ENSDARG00000001154	ENSDART00000001313	8	10	10	GCAACCTCCGGGATGCTGTGAAGCC	7	-	2171	3498
ENSDARG00000001154	ENSDART00000001313	8	10	10	AGCCTCCTCGAAACGCAGGCGCT	5	-	2234	3498
ENSDARG00000001154	ENSDART00000001313	8	12	12	CTCAACAGCAGCATCAGGGTTGGGT	7	-	2952	3498
ENSDARG00000001154	ENSDART00000001313	8	12	12	AACAGCAGCATCAGGGTTGGGTG	5	-	2951	3498
ENSDARG00000001154	ENSDART00000001313	8	14	14	ACCTCCACATCTACATTAGGCGAG	6	-	3261	3498
ENSDARG00000001154	ENSDART00000001313	8	14	14	TACCTCCACATCTACATTAGGCGAG	7	-	3261	3498
ENSDARG00000001154	ENSDART00000001313	8	14	14	CGCGTCGACACTGCATGCTGTCTTC	7	-	3197	3498
ENSDARG00000001154	ENSDART00000001313	8	16	16	CACTTCTTCGAGAAAGTTGGAGGG	6	-	3385	3498
ENSDARG00000001621	ENSDART00000003493	8	5	4	GCCATCAGCGTTCACAGGCTGGTAC	7	-	426	1008
ENSDARG00000001621	ENSDART00000003493	8	6	5	GTTTCCAGATACGGGCAGGGTAA	5	-	572	1008
ENSDARG00000001621	ENSDART00000099571	8	6	5	GCCATCAGCGTTCACAGGCTGGTAC	7	-	510	1074
ENSDARG00000001621	ENSDART00000099571	8	7	6	GTTTCCAGATACGGGCAGGGTAA	5	-	656	1074
ENSDARG00000001686	ENSDART00000030885	8	1	1	TACTCCAGCGGGAGTGGTGAAGAC	6	+	1	1539
ENSDARG00000001686	ENSDART00000030885	8	2	2	AGCCAATAAAATCATTGAAGCTTTG	7	+	231	1539
ENSDARG00000001686	ENSDART00000030885	8	3	3	GACGCCAGAAAGAGTGGGTGAGTG	6	+	455	1539
ENSDARG00000001686	ENSDART00000030885	8	4	4	GAAGGCATCTTATCCTTTGCAGAC	6	+	505	1539
ENSDARG00000001686	ENSDART00000030885	8	5	5	AGAGACATCACAGAGAGAGGACGGG	7	+	607	1539
ENSDARG00000001686	ENSDART00000030885	8	5	5	ACATTCGTCTGGTACGGCGGCTGAG	7	+	581	1539
ENSDARG00000001686	ENSDART00000030885	8	5	5	AGATTCAGACATTCGTCTGGTAC	5	+	573	1539
ENSDARG00000001686	ENSDART00000030885	8	6	6	GTTCACAGCCAGCTGGAAGAAGTG	6	+	775	1539
ENSDARG00000001686	ENSDART00000030885	8	8	8	GCACACCGCAGGTTCGAGGTCTTC	6	+	875	1539
ENSDARG00000001686	ENSDART00000030885	8	8	8	TCCCTCAGACTCTCAGTGTTTTGGA	7	+	848	1539
ENSDARG00000001686	ENSDART00000030885	8	8	8	CCCTCAGACTCTCAGTGTTTTGGAA	7	+	849	1539
ENSDARG00000001686	ENSDART00000030885	8	8	8	CCCTCAGACTCTCAGTGTTTTGGA	6	+	849	1539
ENSDARG00000001686	ENSDART00000030885	8	8	8	CACACCGCAGGTTCGAGGTCTTC	5	+	876	1539
ENSDARG00000001686	ENSDART00000030885	8	9	9	ATCTTCTACTCAAAGAGACTGATGC	7	+	940	1539
ENSDARG00000001686	ENSDART00000030885	8	9	9	AAAGACACCAGCCGTGACGAGTTC	6	+	916	1539
ENSDARG00000001686	ENSDART00000030885	8	12	12	TTCAGCTGCATTACCTGCGGCTGCC	7	+	1187	1539
ENSDARG00000001686	ENSDART00000030885	8	12	12	TTCAGCTGCATTACCTGCGGCTGC	6	+	1187	1539
ENSDARG00000001686	ENSDART00000030885	8	13	13	AAAATCATCACCACTGCTGTGGAC	6	+	1393	1539
ENSDARG00000001686	ENSDART00000081051	8	1	1	TACTCCAGCGGGAGTGGTGAAGAC	6	+	1	1542
ENSDARG00000001686	ENSDART00000081051	8	2	2	AGCCAATAAAATCATTGAAGCTTTG	7	+	231	1542
ENSDARG00000001686	ENSDART00000081051	8	3	3	GACGCCAGAAAGAGTGGGTGAGTG	6	+	455	1542
ENSDARG00000001686	ENSDART00000081051	8	4	4	GAAGGCATCTTATCCTTTGCAGAC	6	+	505	1542
ENSDARG00000001686	ENSDART00000081051	8	5	5	ACATTCGTCTGGTACGGCGGCTGAG	7	+	581	1542
ENSDARG00000001686	ENSDART00000081051	8	5	5	AGAGACATCACAGAGAGAGGACGGG	7	+	607	1542
ENSDARG00000001686	ENSDART00000081051	8	5	5	AGATTCAGACATTCGTCTGGTAC	5	+	573	1542
ENSDARG00000001686	ENSDART00000081051	8	6	6	GTTCACAGCCAGCTGGAAGAAGTG	6	+	775	1542
ENSDARG00000001686	ENSDART00000081051	8	8	8	CACACCGCAGGTTCGAGGTCTTC	5	+	876	1542
ENSDARG00000001686	ENSDART00000081051	8	8	8	TCCCTCAGACTCTCAGTGTTTTGGA	7	+	848	1542
ENSDARG00000001686	ENSDART00000081051	8	8	8	GCACACCGCAGGTTCGAGGTCTTC	6	+	875	1542
ENSDARG00000001686	ENSDART00000081051	8	8	8	CCCTCAGACTCTCAGTGTTTTGGAA	7	+	849	1542
ENSDARG00000001686	ENSDART00000081051	8	8	8	CCCTCAGACTCTCAGTGTTTTGGA	6	+	849	1542
ENSDARG00000001686	ENSDART00000081051	8	9	9	ATCTTCTACTCAAAGAGACTGATGC	7	+	940	1542
ENSDARG00000001686	ENSDART00000081051	8	9	9	AAAGACACCAGCCGTGACGAGTTC	6	+	916	1542
ENSDARG00000001686	ENSDART00000081051	8	12	12	TTCAGCTGCATTACCTGCGGCTGCC	7	+	1187	1542
ENSDARG00000001686	ENSDART00000081051	8	12	12	TTCAGCTGCATTACCTGCGGCTGC	6	+	1187	1542
ENSDARG00000001686	ENSDART00000081051	8	14	14	AAAATCATCACCACTGCTGTGGAC	6	+	1396	1542
ENSDARG00000001686	ENSDART00000099903	8	1	1	TACTCCAGCGGGAGTGGTGAAGAC	6	+	4	1548
ENSDARG00000001686	ENSDART00000099903	8	2	2	AGCCAATAAAATCATTGAAGCTTTG	7	+	234	1548
ENSDARG00000001686	ENSDART00000099903	8	3	3	GACGCCAGAAAGAGTGGGTGAGTG	6	+	458	1548
ENSDARG00000001686	ENSDART00000099903	8	4	4	GAAGGCATCTTATCCTTTGCAGAC	6	+	508	1548
ENSDARG00000001686	ENSDART00000099903	8	5	5	AGATTCAGACATTCGTCTGGTAC	5	+	576	1548
ENSDARG00000001686	ENSDART00000099903	8	5	5	AGAGACATCACAGAGAGAGGACGGG	7	+	610	1548
ENSDARG00000001686	ENSDART00000099903	8	5	5	ACATTCGTCTGGTACGGCGGCTGAG	7	+	584	1548
ENSDARG00000001686	ENSDART00000099903	8	6	6	GTTCACAGCCAGCTGGAAGAAGTG	6	+	778	1548
ENSDARG00000001686	ENSDART00000099903	8	8	8	TCCCTCAGACTCTCAGTGTTTTGGA	7	+	872	1548
ENSDARG00000001686	ENSDART00000099903	8	8	8	CACACCGCAGGTTCGAGGTCTTC	5	+	900	1548
ENSDARG00000001686	ENSDART00000099903	8	8	8	CCCTCAGACTCTCAGTGTTTTGGA	6	+	873	1548
ENSDARG00000001686	ENSDART00000099903	8	8	8	CCCTCAGACTCTCAGTGTTTTGGAA	7	+	873	1548
ENSDARG00000001686	ENSDART00000099903	8	8	8	GCACACCGCAGGTTCGAGGTCTTC	6	+	899	1548
ENSDARG00000001686	ENSDART00000099903	8	9	9	AAAGACACCAGCCGTGACGAGTTC	6	+	940	1548
ENSDARG00000001686	ENSDART00000099903	8	9	9	ATCTTCTACTCAAAGAGACTGATGC	7	+	964	1548
ENSDARG00000001686	ENSDART00000099903	8	12	12	TTCAGCTGCATTACCTGCGGCTGC	6	+	1211	1548
ENSDARG00000001686	ENSDART00000099903	8	12	12	TTCAGCTGCATTACCTGCGGCTGCC	7	+	1211	1548
ENSDARG00000001686	ENSDART00000099903	8	14	14	AAAATCATCACCACTGCTGTGGAC	6	+	1420	1548
ENSDARG00000001832	ENSDART00000043525	8	4	4	GTCTCACCCCATGTTTTGGTGTT	5	-	610	735
ENSDARG00000001832	ENSDART00000043525	8	4	4	CTCACCCCATGTTTTGGTGTTGGGT	7	-	606	735
ENSDARG00000001832	ENSDART00000043525	8	4	4	CTCACCCCATGTTTTGGTGTTGGG	6	-	607	735
ENSDARG00000001968	ENSDART00000015126	8	1	1	GTCGTCCACACTCAGACGGATGT	5	+	30	648
ENSDARG00000001968	ENSDART00000015126	8	2	2	GTTCTCTCCCGCTCGGAGGAAGAT	6	+	172	648
ENSDARG00000001968	ENSDART00000015126	8	2	2	GTTCGCTGCTCTCCCGGGTGAGCG	6	+	134	648
ENSDARG00000001968	ENSDART00000015126	8	4	4	TCCCCCAGAGAAGCAGCCGAGGCC	6	+	288	648
ENSDARG00000001968	ENSDART00000015126	8	4	4	AACCCACTCAGCCCTCTGCCTGC	5	+	388	648
ENSDARG00000001968	ENSDART00000015126	8	4	4	AGATTCCCCCAGAGAAGCAGCCGAG	7	+	284	648
ENSDARG00000001968	ENSDART00000015126	8	4	4	ACAACCCACTCAGCCCTCTGCCTGC	7	+	386	648
ENSDARG00000002172	ENSDART00000074125	8	1	1	TTCGTCATCACGCTGCCGCTGTG	5	+	235	1056
ENSDARG00000002172	ENSDART00000074125	8	1	1	TACGCCTTCTTCGACCTGCGGTTTC	7	+	934	1056
ENSDARG00000002172	ENSDART00000074125	8	1	1	GTCTTCTGCCTGACCTGTCTGAGTT	7	+	352	1056
ENSDARG00000002172	ENSDART00000074125	8	1	1	GGCTACCACTGGCCATTTGGCGTG	6	+	277	1056
ENSDARG00000002172	ENSDART00000074125	8	1	1	CTCTTCCGCACTACAGTAGACGAC	6	+	499	1056
ENSDARG00000002172	ENSDART00000074125	8	1	1	CGCTGCCGCTGTGGGCTGTGTAC	5	+	245	1056
ENSDARG00000002172	ENSDART00000074125	8	1	1	ATCATCACCACACTAGTGGTGGTC	6	+	748	1056
ENSDARG00000002172	ENSDART00000074125	8	1	1	ATCACCACACTAGTGGTGGTCTTC	6	+	751	1056
ENSDARG00000002172	ENSDART00000074125	8	1	1	AAATCCAAAAGGCGCGCGGCAGAT	6	+	175	1056
ENSDARG00000002230	ENSDART00000011453	8	2	2	TTACTCACCCATTGTAAGATTTT	5	-	79	891
ENSDARG00000002230	ENSDART00000011453	8	2	2	GAATCCTAATGGCTGTTTGACGAT	6	-	52	891
ENSDARG00000002230	ENSDART00000011453	8	2	2	TACTCACCCATTGTAAGATTTTGAT	7	-	76	891
ENSDARG00000002230	ENSDART00000011453	8	4	4	GAAGACGCCGATGGTGACGAAGAA	6	-	310	891
ENSDARG00000002230	ENSDART00000011453	8	4	4	GAACTCTGCAGAGGAAGAGTTGTCT	7	-	288	891
ENSDARG00000002230	ENSDART00000011453	8	4	4	GCATCAAACCATACCTGGTGCAGTC	7	-	218	891
ENSDARG00000002230	ENSDART00000011453	8	4	4	ATCAAACCATACCTGGTGCAGTC	5	-	218	891
ENSDARG00000002230	ENSDART00000011453	8	4	4	AAACCATACCTGGTGCAGTCTGT	5	-	215	891
ENSDARG00000002230	ENSDART00000011453	8	5	5	CTCACCAGCCACATGAAGGTGAA	5	-	439	891
ENSDARG00000002230	ENSDART00000011453	8	5	5	ACCAGCCACATGAAGGTGAAAAC	5	-	436	891
ENSDARG00000002230	ENSDART00000011453	8	5	5	AACTCACCAGCCACATGAAGGTGAA	7	-	439	891
ENSDARG00000002230	ENSDART00000011453	8	5	5	GACGTCATCAGGGTCGGTGGCTCT	6	-	499	891
ENSDARG00000002230	ENSDART00000011453	8	6	6	GAAAGCCGCCATCCAGCCGGTTTC	6	-	667	891
ENSDARG00000002230	ENSDART00000011453	8	6	6	CTCTCCAGATGGCATGTAGGTGCC	6	-	694	891
ENSDARG00000002230	ENSDART00000011453	8	6	6	AAAGCCGCCATCCAGCCGGTTTC	5	-	667	891
ENSDARG00000002295	ENSDART00000028648	8	21	21	AAACAAGGCTTCAGAGGTAGAGGAG	7	+	1093	3771
ENSDARG00000002295	ENSDART00000028648	8	21	21	CAAGGCTTCAGAGGTAGAGGAGGCC	7	+	1096	3771
ENSDARG00000002295	ENSDART00000028648	8	58	58	TCCTCATGCAGAGAGCTGAGTCT	5	+	3424	3771
ENSDARG00000002295	ENSDART00000028648	8	58	58	AGCCTCACCTCAGAGACGGTGAG	5	+	3452	3771
ENSDARG00000002597	ENSDART00000004546	8	2	1	CCCTCACCATCAGCAGGCTGCTGGA	7	-	185	1899
ENSDARG00000002597	ENSDART00000004546	8	2	1	CTCACCATCAGCAGGCTGCTGGA	5	-	185	1899
ENSDARG00000002597	ENSDART00000004546	8	6	5	GTCATCACACAGACGCTAAGAGTTT	7	-	656	1899
ENSDARG00000002597	ENSDART00000004546	8	9	8	AGAGCCACATAAAGTGGTTTAGTGC	7	-	1085	1899
ENSDARG00000002597	ENSDART00000004546	8	9	8	ATCTCAGTCACTGCCTTTGTGGCC	6	-	1044	1899
ENSDARG00000002597	ENSDART00000004546	8	12	11	TACCCATTCGTTGGGTGTTGTTT	5	-	1425	1899
ENSDARG00000002597	ENSDART00000004546	8	13	12	CTCTCCCGCCTGCAGTCTGGGTC	5	-	1461	1899
ENSDARG00000002597	ENSDART00000004546	8	14	13	TGCAGCTGCCAGCATTGAGGCAGTA	7	-	1635	1899
ENSDARG00000002597	ENSDART00000004546	8	15	14	TGCAAAATCTGGATGAGTGGGTA	5	-	1699	1899
ENSDARG00000002597	ENSDART00000004546	8	17	16	TACAAAGACCAAATTGATGTAGAA	6	-	1887	1899
ENSDARG00000002597	ENSDART00000040287	8	2	1	CTCACCATCAGCAGGCTGCTGGA	5	-	185	1866
ENSDARG00000002597	ENSDART00000040287	8	2	1	CCCTCACCATCAGCAGGCTGCTGGA	7	-	185	1866
ENSDARG00000002597	ENSDART00000040287	8	6	5	GTCATCACACAGACGCTAAGAGTTT	7	-	656	1866
ENSDARG00000002597	ENSDART00000040287	8	9	8	ATCTCAGTCACTGCCTTTGTGGCC	6	-	1044	1866
ENSDARG00000002597	ENSDART00000040287	8	9	8	AGAGCCACATAAAGTGGTTTAGTGC	7	-	1085	1866
ENSDARG00000002597	ENSDART00000040287	8	11	10	TACCCATTCGTTGGGTGTTGTTT	5	-	1425	1866
ENSDARG00000002597	ENSDART00000040287	8	12	11	CTCTCCCGCCTGCAGTCTGGGTC	5	-	1461	1866
ENSDARG00000002597	ENSDART00000040287	8	13	12	TGCAGCTGCCAGCATTGAGGCAGTA	7	-	1635	1866
ENSDARG00000002597	ENSDART00000040287	8	14	13	TGCAAAATCTGGATGAGTGGGTA	5	-	1699	1866
ENSDARG00000002642	ENSDART00000026374	8	1	1	GAACTCCTCGTCCAGTTTAGTTC	5	-	44	1011
ENSDARG00000002642	ENSDART00000026374	8	2	2	CACTTCTACCACAGCTTTATTTGTC	7	-	93	1011
ENSDARG00000002642	ENSDART00000026374	8	3	3	AGCAGCCCCTCAGCCTGTGGATAAC	7	-	221	1011
ENSDARG00000002642	ENSDART00000026374	8	3	3	AGCAGCCCCTCAGCCTGTGGATAA	6	-	222	1011
ENSDARG00000002642	ENSDART00000026374	8	5	5	AACTTCTCCAGCGCTTGCCTGAGCT	7	-	512	1011
ENSDARG00000002642	ENSDART00000026374	8	6	6	ACACACACCTGTCTCTGAGTTTGTC	7	-	679	1011
ENSDARG00000002642	ENSDART00000026374	8	7	7	TCCAAAGTCGATAACAGGCTTGGGT	7	-	741	1011
ENSDARG00000002642	ENSDART00000026374	8	8	8	ACAATCACCTCCACGTAGTTGAG	5	-	985	1011
ENSDARG00000002642	ENSDART00000026374	8	8	8	GCCCTCTTAGTGTGGCAGAGGAA	5	-	1007	1011
ENSDARG00000002642	ENSDART00000100491	8	2	2	GAACTCCTCGTCCAGTTTAGTTC	5	-	86	1056
ENSDARG00000002642	ENSDART00000100491	8	3	3	CACTTCTACCACAGCTTTATTTGTC	7	-	135	1056
ENSDARG00000002642	ENSDART00000100491	8	4	4	AGCAGCCCCTCAGCCTGTGGATAAC	7	-	263	1056
ENSDARG00000002642	ENSDART00000100491	8	4	4	AGCAGCCCCTCAGCCTGTGGATAA	6	-	264	1056
ENSDARG00000002642	ENSDART00000100491	8	6	6	AACTTCTCCAGCGCTTGCCTGAGCT	7	-	554	1056
ENSDARG00000002642	ENSDART00000100491	8	9	9	TCCAAAGTCGATAACAGGCTTGGGT	7	-	786	1056
ENSDARG00000002642	ENSDART00000100491	8	10	10	ACAATCACCTCCACGTAGTTGAG	5	-	1030	1056
ENSDARG00000002642	ENSDART00000100491	8	10	10	GCCCTCTTAGTGTGGCAGAGGAA	5	-	1052	1056
ENSDARG00000003098	ENSDART00000005583	8	1	1	AAACTCGGCCGGGCCCTGCTGGGTC	7	-	12	4509
ENSDARG00000003098	ENSDART00000005583	8	2	2	GACGTCACATGCGAATGGGGGCTGC	7	-	168	4509
ENSDARG00000003098	ENSDART00000005583	8	2	2	GTCGACGTCACATGCGAATGGGGG	6	-	172	4509
ENSDARG00000003098	ENSDART00000005583	8	4	4	GTCCCAGACTGAAAGAGGTTGTA	5	-	502	4509
ENSDARG00000003098	ENSDART00000005583	8	5	5	ACCTCATCCCCAGGCTTCTGCAGAC	7	-	536	4509
ENSDARG00000003098	ENSDART00000005583	8	5	5	TGCCTCTGCAGTAGGTCGTGGGG	5	-	586	4509
ENSDARG00000003098	ENSDART00000005583	8	6	6	ATCCTCCTCCTGAGATTTGGCTTG	6	-	717	4509
ENSDARG00000003098	ENSDART00000005583	8	6	6	CCCATCCTCCTCCTGAGATTTGGCT	7	-	719	4509
ENSDARG00000003098	ENSDART00000005583	8	6	6	TCCTCCTCCTGAGATTTGGCTTG	5	-	717	4509
ENSDARG00000003098	ENSDART00000005583	8	8	8	TTAAGCAGAATGTGTGGTAGCTGTC	7	-	961	4509
ENSDARG00000003098	ENSDART00000005583	8	9	9	CCCAAAGGCTTTGAGAGTATAGTCT	7	-	1092	4509
ENSDARG00000003098	ENSDART00000005583	8	9	9	GCCAAATGCCTCCTGAGGTTTAC	5	-	1052	4509
ENSDARG00000003098	ENSDART00000005583	8	10	10	CACATCCTCCTGAATGGTGCCGAC	6	-	1207	4509
ENSDARG00000003098	ENSDART00000005583	8	10	10	ACCCACTTCCGAACTCTTTTGAG	5	-	1257	4509
ENSDARG00000003098	ENSDART00000005583	8	10	10	ACATCCTCCTGAATGGTGCCGAC	5	-	1207	4509
ENSDARG00000003098	ENSDART00000005583	8	10	10	ACCCACTTCCGAACTCTTTTGAGGC	7	-	1255	4509
ENSDARG00000003098	ENSDART00000005583	8	12	12	GCACCATACCAGGTCTTAGGTTCT	6	-	1509	4509
ENSDARG00000003098	ENSDART00000005583	8	13	13	CACAGCCTCTGCAAAGTTGAAGCC	6	-	1744	4509
ENSDARG00000003098	ENSDART00000005583	8	13	13	CTCTCCTGCGCACTGATTGGTTC	5	-	1676	4509
ENSDARG00000003098	ENSDART00000005583	8	14	14	AAACACACAGTAGCGATGCAGCT	5	-	1826	4509
ENSDARG00000003098	ENSDART00000005583	8	14	14	GAAAACACACAGTAGCGATGCAGCT	7	-	1826	4509
ENSDARG00000003098	ENSDART00000005583	8	17	17	GTCTGCCGCTTGCCATTTAGCAGTT	7	-	2414	4509
ENSDARG00000003098	ENSDART00000005583	8	18	18	TTCCTCCACTGTGAGCTGATTAG	5	-	2468	4509
ENSDARG00000003098	ENSDART00000005583	8	19	19	AGAAGCTTCTCACTGTGCTGCTGGA	7	-	2582	4509
ENSDARG00000003098	ENSDART00000005583	8	19	19	GCCTTCAGCAGAGCCTGCGCATTC	6	-	2901	4509
ENSDARG00000003098	ENSDART00000005583	8	19	19	GTTCCAGACGCTCCCGTAGCAGCG	6	-	2696	4509
ENSDARG00000003098	ENSDART00000005583	8	19	19	CACTTCATCAGATAGAAGCTTCT	5	-	2597	4509
ENSDARG00000003098	ENSDART00000005583	8	19	19	AGACGCTCCCGTAGCAGCGGCAGCT	7	-	2690	4509
ENSDARG00000003098	ENSDART00000005583	8	21	21	ACCTCCAGCAGCGTGAAGGGGGA	5	-	3226	4509
ENSDARG00000003098	ENSDART00000005583	8	21	21	TCCAGCAGCGTGAAGGGGGAGCT	5	-	3223	4509
ENSDARG00000003098	ENSDART00000005583	8	22	22	AAACTCACAGCAGATGCAGAGTCT	6	-	3393	4509
ENSDARG00000003098	ENSDART00000005583	8	23	23	GCAGTCGGCTGTGGGCAGGAGCT	5	-	3482	4509
ENSDARG00000003098	ENSDART00000005583	8	23	23	GACCCCGCACACACACGCTGTGGAA	7	-	3580	4509
ENSDARG00000003098	ENSDART00000005583	8	23	23	CCCCGCACACACACGCTGTGGAA	5	-	3580	4509
ENSDARG00000003098	ENSDART00000005583	8	24	24	GAATACAGCGCTGTTCTGTGTAA	5	-	3954	4509
ENSDARG00000003098	ENSDART00000005583	8	25	25	GTTTACCTCTGTCTGTGGTGGTG	5	-	4130	4509
ENSDARG00000003098	ENSDART00000005583	8	25	25	AGCTCCTCCAGCTCTGGACTGAGAC	7	-	3986	4509
ENSDARG00000003098	ENSDART00000005583	8	25	25	GTTTACCTCTGTCTGTGGTGGTGTG	7	-	4128	4509
ENSDARG00000003098	ENSDART00000005583	8	26	26	CTCTTCTCCCTCAGGCTGGAGAC	5	-	4364	4509
ENSDARG00000003098	ENSDART00000005583	8	27	27	CTCGGCTGCCAGTTCTGCTGAGAC	6	-	4444	4509
ENSDARG00000003098	ENSDART00000005583	8	27	27	CTCCTCGGCTGCCAGTTCTGCTGAG	7	-	4446	4509
ENSDARG00000003181	ENSDART00000030557	8	2	2	GCATTCGTCCGGACATGTTTGATTT	7	+	53	912
ENSDARG00000003181	ENSDART00000030557	8	4	4	GCCCAAGTCCTTCTGGGAGCAGAA	6	+	381	912
ENSDARG00000003181	ENSDART00000030557	8	6	6	CACGTCAGCGGATGGTGGCAGAA	5	+	562	912
ENSDARG00000003181	ENSDART00000030557	8	6	6	TTCGACCACGTCAGCGGATGGTGGC	7	+	556	912
ENSDARG00000003303	ENSDART00000025008	8	2	2	CACCGCGCCACATCCGCTGTGGAA	6	-	117	750
ENSDARG00000003303	ENSDART00000025008	8	3	3	CACCTCTGCAATGGCTTCTGGGTTT	7	-	426	750
ENSDARG00000003303	ENSDART00000025008	8	3	3	ATCATCCTCTGAAAGGTGGAGCA	5	-	346	750
ENSDARG00000003303	ENSDART00000025008	8	3	3	AAATCATCCTCTGAAAGGTGGAGCA	7	-	346	750
ENSDARG00000003303	ENSDART00000025008	8	4	4	CACTCCATCAAACTCTGCAGTAGTT	7	-	491	750
ENSDARG00000003303	ENSDART00000025008	8	4	4	CGCAGCAGACGGACACGGCTTGTTC	7	-	600	750
ENSDARG00000003303	ENSDART00000025008	8	4	4	GCCCTAATCGGGTCAGCAGATTTG	6	-	545	750
ENSDARG00000003303	ENSDART00000025008	8	4	4	TGCCAAAGAGATTGGAGGCATCT	5	-	711	750
ENSDARG00000003323	ENSDART00000017567	8	1	1	TTCTCACCCATTCGTTGGCTTTGGG	7	-	127	1317
ENSDARG00000003323	ENSDART00000017567	8	1	1	CACCCATTCGTTGGCTTTGGGGTT	6	-	124	1317
ENSDARG00000003323	ENSDART00000017567	8	5	5	TGCTCACACTTCTGTCTGGAGAC	5	-	417	1317
ENSDARG00000003323	ENSDART00000017567	8	6	6	ATCAGCACCTTCTCATGCTGAGCT	6	-	588	1317
ENSDARG00000003323	ENSDART00000017567	8	9	9	TCCTGCAGCTGAGTTCTGCTGTA	5	-	1204	1317
ENSDARG00000003564	ENSDART00000018515	8	4	3	GTTTTCATCTGTCCCATCTTTTGTC	7	-	423	915
ENSDARG00000003564	ENSDART00000018515	8	4	3	GTCCACAGAGCAGTAGGGGTTTTC	6	-	442	915
ENSDARG00000003564	ENSDART00000018515	8	5	4	CTCCAAAGCTGCCTGCAGCTGAG	5	-	689	915
ENSDARG00000003564	ENSDART00000018515	8	5	4	TTCTCCAAAGCTGCCTGCAGCTGAG	7	-	689	915
ENSDARG00000003564	ENSDART00000018515	8	5	4	TCCATCTTCTCCAAAGCTGCCTGC	6	-	696	915
ENSDARG00000003564	ENSDART00000018515	8	5	4	CAAAGCTGCCTGCAGCTGAGGGA	5	-	686	915
ENSDARG00000003564	ENSDART00000018515	8	5	4	CACGGCTCCTTCCCGATGGAGCC	5	-	760	915
ENSDARG00000003564	ENSDART00000018515	8	5	4	GCCTGCAGCTGAGGGATGCTGGC	5	-	679	915
ENSDARG00000003695	ENSDART00000030908	8	2	2	TTCAGCAAAGGATACGGTGAGTGT	6	+	166	954
ENSDARG00000003695	ENSDART00000030908	8	3	3	GACCAAGTCTCAGAGTGGAGTTGTG	7	+	210	954
ENSDARG00000003695	ENSDART00000030908	8	3	3	GACCAAGTCTCAGAGTGGAGTTG	5	+	210	954
ENSDARG00000003695	ENSDART00000030908	8	4	4	GAACACAGATAACGTTTTGACAAC	6	+	339	954
ENSDARG00000003695	ENSDART00000030908	8	4	4	ACAGACACCGGAAAGGCCGCTGGA	6	+	259	954
ENSDARG00000003695	ENSDART00000030908	8	6	6	AGCTACACACCAATGTGTGAGGAA	6	+	650	954
ENSDARG00000003695	ENSDART00000030908	8	6	6	AGCTACACACCAATGTGTGAGGA	5	+	650	954
ENSDARG00000003695	ENSDART00000030908	8	7	7	GGCTCCATCTATCAGAAGGTGAA	5	+	688	954
ENSDARG00000003695	ENSDART00000030908	8	7	7	AGATTCCTCCGTCTCTGTGAGTCT	6	+	801	954
ENSDARG00000003695	ENSDART00000030908	8	8	8	CAACAATGCTAGTCTGGTTGGAG	5	+	825	954
ENSDARG00000003695	ENSDART00000030908	8	8	8	AAAGTCAACAATGCTAGTCTGGTTG	7	+	820	954
ENSDARG00000003695	ENSDART00000030908	8	8	8	CAACAATGCTAGTCTGGTTGGAGTG	7	+	825	954
ENSDARG00000003695	ENSDART00000030908	8	9	9	TGCCAAAAACTTCAACGCTGGAGGA	7	+	906	954
ENSDARG00000003695	ENSDART00000030908	8	9	9	GCCAAAAACTTCAACGCTGGAGGA	6	+	907	954
ENSDARG00000003749	ENSDART00000002764	8	6	6	AAAAACTTCCTGGCGGCAGCAGGA	6	-	330	1017
ENSDARG00000003749	ENSDART00000002764	8	6	6	GTCAAAAAACTTCCTGGCGGCAGCA	7	-	333	1017
ENSDARG00000003749	ENSDART00000002764	8	8	8	ACCAACCTCCATTTTTTGCATCT	5	-	470	1017
ENSDARG00000003749	ENSDART00000002764	8	9	9	AACCTCTTCTGTAGCTGCCGCAGAT	7	-	538	1017
ENSDARG00000003749	ENSDART00000002764	8	9	9	AGCTGCCGCAGATGGTGCCGATGTA	7	-	526	1017
ENSDARG00000003749	ENSDART00000002764	8	10	10	TTCTCAGACTGAGATGTGAAGTC	5	-	604	1017
ENSDARG00000003749	ENSDART00000002764	8	11	11	GACTCACCATGAATTTAGTGTCT	5	-	702	1017
ENSDARG00000003749	ENSDART00000002764	8	11	11	AGACTCACCATGAATTTAGTGTCT	6	-	702	1017
ENSDARG00000003867	ENSDART00000021607	8	1	1	AAAGCCAAACACATTGAGGTTGTG	6	+	67	1032
ENSDARG00000003867	ENSDART00000021607	8	3	3	CACGGCACAGGCTTTGTGCTGGT	5	+	226	1032
ENSDARG00000003867	ENSDART00000021607	8	3	3	AACTCCATCATGCATAGGGTGAGCT	7	+	370	1032
ENSDARG00000003867	ENSDART00000021607	8	7	7	AACCCACCCATTCCTTTGGAGGA	5	+	742	1032
ENSDARG00000003867	ENSDART00000021607	8	7	7	AAACCCACCCATTCCTTTGGAGGA	6	+	741	1032
ENSDARG00000003867	ENSDART00000021607	8	7	7	AAAACCCACCCATTCCTTTGGAGGA	7	+	740	1032
ENSDARG00000003867	ENSDART00000021607	8	8	8	TGCCCATTCCTCAGCGTGGAGGAA	6	+	908	1032
ENSDARG00000003996	ENSDART00000098714	8	1	1	ACCGTCTAAGCCGTGCTGCTGTG	5	+	74	1203
ENSDARG00000003996	ENSDART00000098714	8	1	1	ACACTCTAATCAGACGGTCGTGGGC	7	+	33	1203
ENSDARG00000003996	ENSDART00000098714	8	3	3	CACCCAGCAGCATGTGCAGGTAAC	6	+	329	1203
ENSDARG00000003996	ENSDART00000098714	8	3	3	ACACCCAGCAGCATGTGCAGGTAAC	7	+	328	1203
ENSDARG00000003996	ENSDART00000098714	8	3	3	AAACACCCAGCAGCATGTGCAGGT	6	+	326	1203
ENSDARG00000003996	ENSDART00000098714	8	4	4	AAATGCACCACCACTTTCTGCAGCC	7	+	537	1203
ENSDARG00000003996	ENSDART00000098714	8	4	4	TTCCCCATCATCAAGTTCTGGAAAC	7	+	747	1203
ENSDARG00000003996	ENSDART00000098714	8	4	4	TGCAAAGCCTAAGAGTAATGGGGA	6	+	1140	1203
ENSDARG00000003996	ENSDART00000098714	8	4	4	TCCAAAATCACAGACCTTTTAGGTG	7	+	910	1203
ENSDARG00000003996	ENSDART00000098714	8	4	4	GTCTCCACAGATGATTGTGTTGCA	6	+	859	1203
ENSDARG00000003996	ENSDART00000098714	8	4	4	AAAATCACAGACCTTTTAGGTGAC	6	+	913	1203
ENSDARG00000003996	ENSDART00000098714	8	4	4	CACCCAAACTCTTTCGTCGAAGTG	6	+	589	1203
ENSDARG00000003996	ENSDART00000098714	8	4	4	CACCAAAACAGAAATGAAGAAGTC	6	+	711	1203
ENSDARG00000003996	ENSDART00000098714	8	4	4	CAAGACAAAGAAGAAAGTTGTAGAC	7	+	960	1203
ENSDARG00000003996	ENSDART00000098714	8	4	4	ACCAAAACAGAAATGAAGAAGTC	5	+	712	1203
ENSDARG00000003996	ENSDART00000098714	8	4	4	ACATCCATCCTGAACGACTTGTTC	6	+	937	1203
ENSDARG00000003996	ENSDART00000098714	8	4	4	AAAGCCTAAGAGTAATGGGGAAAC	6	+	1143	1203
ENSDARG00000004094	ENSDART00000012120	8	2	1	GTCCACAGCTGTAGTGATGGAGCA	6	+	12	1971
ENSDARG00000004094	ENSDART00000012120	8	3	2	GTCATCAGAGGAAGAATCTGCATGT	7	+	126	1971
ENSDARG00000004094	ENSDART00000012120	8	4	3	TTAAGCTTAGGATGGCCGAGTCT	5	+	284	1971
ENSDARG00000004094	ENSDART00000012120	8	4	3	GCACTCGGCTGGAAAGAAGGAGAG	6	+	382	1971
ENSDARG00000004094	ENSDART00000012120	8	4	3	GACTACACACCGGGATGGAGAGGTT	7	+	261	1971
ENSDARG00000004094	ENSDART00000012120	8	4	3	CTACACACCGGGATGGAGAGGTT	5	+	263	1971
ENSDARG00000004094	ENSDART00000012120	8	5	4	GGCTTCAACTCAACCGAGTGGTTT	6	+	511	1971
ENSDARG00000004094	ENSDART00000012120	8	5	4	CGCTACCACGGCGTTGGGATTCT	5	+	487	1971
ENSDARG00000004094	ENSDART00000012120	8	6	5	GAAAACCACAAACAGCTGCAGAA	5	+	652	1971
ENSDARG00000004094	ENSDART00000012120	8	6	5	GCCAACATCCTGGTGGTGGAAAAC	6	+	634	1971
ENSDARG00000004094	ENSDART00000012120	8	6	5	ACAACCAACTCTCCTGAGGCCTGC	6	+	586	1971
ENSDARG00000004094	ENSDART00000012120	8	10	9	GTCCCCCGCGTGTGGGAGAAGAT	5	+	1144	1971
ENSDARG00000004094	ENSDART00000012120	8	10	9	ACCTCAACAAAATGGAGCTGTATGT	7	+	1256	1971
ENSDARG00000004094	ENSDART00000012120	8	10	9	AACCTCAACAAAATGGAGCTGTA	5	+	1255	1971
ENSDARG00000004094	ENSDART00000012120	8	10	9	CAAATCATCCACAGTGCGCCGGA	5	+	1194	1971
ENSDARG00000004094	ENSDART00000012120	8	10	9	CTCAACAAAATGGAGCTGTATGT	5	+	1258	1971
ENSDARG00000004094	ENSDART00000012120	8	12	11	AGCTCAGCAACCCTGATGATGAA	5	+	1547	1971
ENSDARG00000004094	ENSDART00000012120	8	12	11	GACCTCGGCAAACTCGATGAGAAC	6	+	1678	1971
ENSDARG00000004094	ENSDART00000012120	8	13	12	AAATTCCTCTCCATGCTGCTTAC	5	+	1843	1971
ENSDARG00000004094	ENSDART00000012120	8	14	13	GACTCCAGAGGCAGTGGAGTTTTG	6	+	1914	1971
ENSDARG00000004094	ENSDART00000012120	8	14	13	GACTCCAGAGGCAGTGGAGTTTTGT	7	+	1914	1971
ENSDARG00000004225	ENSDART00000065892	8	2	2	AAAAAAGACAAAGAAGTTGCTGAA	6	+	430	1578
ENSDARG00000004225	ENSDART00000065892	8	2	2	AAAGACAAAGAAGTTGCTGAATAC	6	+	433	1578
ENSDARG00000004225	ENSDART00000065892	8	2	2	TGCTCACTCATTCAGATGGAGGA	5	+	617	1578
ENSDARG00000004225	ENSDART00000065892	8	2	2	ACCTGCTGCACTGTCTGTGAGGAA	6	+	1087	1578
ENSDARG00000004225	ENSDART00000065892	8	2	2	GAAAACTGCCATGAATGGGGCTGC	6	+	1108	1578
ENSDARG00000004225	ENSDART00000065892	8	2	2	GAAAACTGCCATGAATGGGGCTGCT	7	+	1108	1578
ENSDARG00000004225	ENSDART00000065892	8	2	2	TACAAAAAAGACAAAGAAGTTGCT	6	+	427	1578
ENSDARG00000004225	ENSDART00000065892	8	3	3	AAAGTCAAACATGCTGGTTGAAAC	6	+	1377	1578
ENSDARG00000004318	ENSDART00000012132	8	7	6	AGATGCTAAATATGGGTTGCAGGT	6	+	462	1104
ENSDARG00000004318	ENSDART00000012132	8	12	11	TTAACCAAAAAGCTGCAGCTGGT	5	+	721	1104
ENSDARG00000004318	ENSDART00000012132	8	15	14	AGAAGCAGAAGAAGGTGATGTTGCA	7	+	926	1104
ENSDARG00000004318	ENSDART00000012132	8	15	14	CGCTCCAGCAGAAGCAGAAGAAGGT	7	+	917	1104
ENSDARG00000004318	ENSDART00000012132	8	15	14	TCCAGCAGAAGCAGAAGAAGGTGAT	7	+	920	1104
ENSDARG00000004318	ENSDART00000012132	8	17	16	GTCAAATAAAGACAGCGTCGAGTAG	7	+	1092	1104
ENSDARG00000004318	ENSDART00000099011	8	6	6	AGATGCTAAATATGGGTTGCAGGT	6	+	462	1098
ENSDARG00000004318	ENSDART00000099011	8	11	11	TTAACCAAAAAGCTGCAGCTGGT	5	+	721	1098
ENSDARG00000004318	ENSDART00000099011	8	14	14	TCCAGCAGAAGCAGAAGAAGGTGAT	7	+	920	1098
ENSDARG00000004318	ENSDART00000099011	8	14	14	CGCTCCAGCAGAAGCAGAAGAAGGT	7	+	917	1098
ENSDARG00000004318	ENSDART00000099011	8	14	14	AGAAGCAGAAGAAGGTGATGTTGCA	7	+	926	1098
ENSDARG00000004318	ENSDART00000099011	8	15	15	GTCAAATAAAGACAGCGTCGAGTAG	7	+	1086	1098
ENSDARG00000004729	ENSDART00000027928	8	2	2	TTCTCCGCCGATTCGGACGCTTTT	6	+	199	1617
ENSDARG00000004729	ENSDART00000027928	8	2	2	AGCCTCTTCTTCCTGAGTCTGGGAT	7	+	146	1617
ENSDARG00000004729	ENSDART00000027928	8	2	2	CTCTTCTTCCTGAGTCTGGGATTGT	7	+	149	1617
ENSDARG00000004729	ENSDART00000027928	8	2	2	AGCCTATTACGCCAAGGTGAGTTT	6	+	239	1617
ENSDARG00000004729	ENSDART00000027928	8	3	3	AGCAAAGCCCACCCAGGTGCCTGT	6	+	447	1617
ENSDARG00000004729	ENSDART00000027928	8	4	4	ACATCCAGCAGGCTCAGAGGCAGCA	7	+	518	1617
ENSDARG00000004729	ENSDART00000027928	8	5	5	GACATCATCAGCCTGGAGTCGAG	5	+	727	1617
ENSDARG00000004729	ENSDART00000027928	8	5	5	ATCATCAGCCTGGAGTCGAGTTT	5	+	730	1617
ENSDARG00000004729	ENSDART00000027928	8	6	6	TGCCCCGCAGACCTGCAGAATGT	5	+	883	1617
ENSDARG00000004729	ENSDART00000027928	8	7	7	GGCAAAAGCTATTATGAAGGAGAG	6	+	930	1617
ENSDARG00000004729	ENSDART00000027928	8	9	9	ACACGCAAACCGCAGTCTGATGC	5	+	1170	1617
ENSDARG00000004729	ENSDART00000027928	8	9	9	ACACGCAAACCGCAGTCTGATGCT	6	+	1170	1617
ENSDARG00000004729	ENSDART00000027928	8	9	9	GCAAGCTGCAAAAGGAGCAGCAGAG	7	+	1109	1617
ENSDARG00000004729	ENSDART00000027928	8	9	9	GCAAACCGCAGTCTGATGCTGCG	5	+	1174	1617
ENSDARG00000004729	ENSDART00000027928	8	9	9	GAACACGCAAACCGCAGTCTGATGC	7	+	1168	1617
ENSDARG00000004729	ENSDART00000027928	8	10	10	AGCTTCAGCATGGAGGAAGACTTG	6	+	1603	1617
ENSDARG00000004729	ENSDART00000027928	8	10	10	CTCAAAAACAAGCAGTCGTAGAA	5	+	1578	1617
ENSDARG00000004729	ENSDART00000027928	8	10	10	CTCCTCCACCTCATCAGTTGGCGGG	7	+	1368	1617
ENSDARG00000004729	ENSDART00000027928	8	10	10	TCCTCCACCTCATCAGTTGGCGGG	6	+	1369	1617
ENSDARG00000004729	ENSDART00000027928	8	10	10	AGCCTCAAAAACAAGCAGTCGTA	5	+	1575	1617
ENSDARG00000004729	ENSDART00000027928	8	10	10	GCCTCAAAAACAAGCAGTCGTAGAA	7	+	1576	1617
ENSDARG00000004757	ENSDART00000024320	8	1	1	GTCGGCGGCAGGCTGCGGCGGCTGT	7	-	33	930
ENSDARG00000004757	ENSDART00000024320	8	1	1	TTATCCCCCGCGGTAGCTGCGGCT	6	-	81	930
ENSDARG00000004757	ENSDART00000024320	8	1	1	GCAGGCTGCGGCGGCTGTTGTGTCT	7	-	26	930
ENSDARG00000004757	ENSDART00000024320	8	1	1	CGCGTCGGCGGCAGGCTGCGGCGGC	7	-	36	930
ENSDARG00000004757	ENSDART00000024320	8	1	1	CGCGTCGGCGGCAGGCTGCGGCG	5	-	38	930
ENSDARG00000004757	ENSDART00000024320	8	1	1	ATCCCCCGCGGTAGCTGCGGCTGCC	7	-	78	930
ENSDARG00000004757	ENSDART00000024320	8	1	1	ATCCCCCGCGGTAGCTGCGGCTGC	6	-	79	930
ENSDARG00000004757	ENSDART00000024320	8	1	1	ACCTTCTTATCCCCCGCGGTAGCT	6	-	87	930
ENSDARG00000004757	ENSDART00000024320	8	1	1	GTCGGCGGCAGGCTGCGGCGGCT	5	-	35	930
ENSDARG00000004757	ENSDART00000024320	8	2	2	GTCCCCAAAACTTTTGTTGCTGCA	6	-	111	930
ENSDARG00000004757	ENSDART00000024320	8	2	2	TCCCCAAAACTTTTGTTGCTGCA	5	-	111	930
ENSDARG00000004757	ENSDART00000024320	8	5	5	GCCTCCGCACGAAGTATGGTGGGTA	7	-	547	930
ENSDARG00000004757	ENSDART00000024320	8	5	5	TGCATCTCCCCCTCGGGGGCGCT	5	-	484	930
ENSDARG00000004757	ENSDART00000024320	8	5	5	GCCGTCTGCCGGGGTAAGTGGGT	5	-	522	930
ENSDARG00000004757	ENSDART00000024320	8	6	6	TTCTGCCTCATTGGTTTGTTGCC	5	-	664	930
ENSDARG00000004757	ENSDART00000024320	8	7	7	GGCGTCTGCGGCGGTAGTTGAAGTT	7	-	817	930
ENSDARG00000004757	ENSDART00000024320	8	7	7	TTCGGCTTCGGGAGCGGCTGATTTG	7	-	900	930
ENSDARG00000004757	ENSDART00000024320	8	7	7	TTCGGCTTCGGGAGCGGCTGATTT	6	-	901	930
ENSDARG00000004757	ENSDART00000024320	8	7	7	GTCTGCGGCGGTAGTTGAAGTTGCG	7	-	814	930
ENSDARG00000005015	ENSDART00000007482	8	1	1	TGCAGCGGCGATGGCAGCGGAATCT	7	-	312	1557
ENSDARG00000005015	ENSDART00000007482	8	1	1	TTCTGCAGCGGCGATGGCAGCGGAA	7	-	315	1557
ENSDARG00000005015	ENSDART00000007482	8	1	1	CTCGCCTCCACTCACATTAGCCTGT	7	-	270	1557
ENSDARG00000005015	ENSDART00000007482	8	1	1	CTCAGCTTCATCTCCAGGCGCTGAT	7	-	758	1557
ENSDARG00000005015	ENSDART00000007482	8	1	1	CGCCTCCACTCACATTAGCCTGT	5	-	270	1557
ENSDARG00000005015	ENSDART00000007482	8	1	1	AGCTTCATCTCCAGGCGCTGATGCA	7	-	755	1557
ENSDARG00000005015	ENSDART00000007482	8	1	1	AGCGACAGACGAACTCGCAGTGGAG	7	-	594	1557
ENSDARG00000005015	ENSDART00000007482	8	1	1	TTCTCCAGCGCGTCCAGCCGCATCT	7	-	716	1557
ENSDARG00000005015	ENSDART00000007482	8	3	3	CACCTCCCATACCGAGATGAAGCT	6	-	1025	1557
ENSDARG00000005015	ENSDART00000007482	8	4	4	ACCCCCTGCGATGTTCGACGTGGTT	7	-	1112	1557
ENSDARG00000005015	ENSDART00000007482	8	6	6	TACTGCTGCCCTGAGGTTTAGGAG	6	-	1283	1557
ENSDARG00000005057	ENSDART00000050228	8	3	3	CGCTGCGACCAACAGACGTTGTT	5	+	146	930
ENSDARG00000005057	ENSDART00000050228	8	5	5	CAAAACAGAACTCCCCTTTTTTGAT	7	+	333	930
ENSDARG00000005057	ENSDART00000050228	8	5	5	GAACTCCCCTTTTTTGATGTCTGC	6	+	340	930
ENSDARG00000005057	ENSDART00000050228	8	6	6	TACTCCACAGGCCATTTTTTAGGTA	7	+	413	930
ENSDARG00000005057	ENSDART00000050228	8	7	7	TCCATCAACACACAGTTGCTGGC	5	+	517	930
ENSDARG00000005057	ENSDART00000050228	8	9	9	ACAAAATGCTCAGTGCTGCCTTC	5	+	695	930
ENSDARG00000005057	ENSDART00000050228	8	10	10	GTCAACACAGATCTGCTGCAGTC	5	+	719	930
ENSDARG00000005392	ENSDART00000023971	8	2	1	GACAGCTTCTTCACAGGCGGCAGGG	7	+	142	1809
ENSDARG00000005392	ENSDART00000023971	8	2	1	AGCTTCTTCACAGGCGGCAGGGGTT	7	+	145	1809
ENSDARG00000005392	ENSDART00000023971	8	2	1	TTCTTCACAGGCGGCAGGGGTTTCT	7	+	148	1809
ENSDARG00000005392	ENSDART00000023971	8	10	9	CTCTCCAGAGCTTTATGTGAGGCT	6	+	1171	1809
ENSDARG00000005392	ENSDART00000023971	8	12	11	GTCCACTGCTGGGAGCATTTGCC	5	+	1289	1809
ENSDARG00000005392	ENSDART00000023971	8	13	12	TTCTCAGGCGTGGCAGTGGGTTTCT	7	+	1351	1809
ENSDARG00000005392	ENSDART00000023971	8	13	12	TTCTCAGGCGTGGCAGTGGGTTTC	6	+	1351	1809
ENSDARG00000005392	ENSDART00000023971	8	13	12	TTCACCACAAATTATGGGTGTTTTG	7	+	1419	1809
ENSDARG00000005392	ENSDART00000023971	8	13	12	TTCACCACAAATTATGGGTGTTT	5	+	1419	1809
ENSDARG00000005392	ENSDART00000023971	8	13	12	TCCTTCACCACAAATTATGGGTG	5	+	1416	1809
ENSDARG00000005392	ENSDART00000023971	8	13	12	CACCACAAATTATGGGTGTTTTGCC	7	+	1421	1809
ENSDARG00000005392	ENSDART00000023971	8	13	12	CACCACAAATTATGGGTGTTTTGC	6	+	1421	1809
ENSDARG00000005392	ENSDART00000023971	8	13	12	CACCACAAATTATGGGTGTTTTG	5	+	1421	1809
ENSDARG00000005392	ENSDART00000023971	8	15	14	AACAAAAGCCCTGCGATGCATCT	5	+	1679	1809
ENSDARG00000005500	ENSDART00000026747	8	3	2	ACACACCTCTGTGTTCGCTGTGTAG	7	-	262	591
ENSDARG00000005500	ENSDART00000026747	8	4	3	AAATCCTGCTTGAGGCCTGAAAC	5	-	274	591
ENSDARG00000005518	ENSDART00000024433	8	1	1	CACTCCAGAGCCCGAGGAGGTGCC	6	+	15	1950
ENSDARG00000005518	ENSDART00000024433	8	1	1	GGCCACTCCAGAGCCCGAGGAGGTG	7	+	12	1950
ENSDARG00000005518	ENSDART00000024433	8	4	4	GTCCTCATCGCCCTGGGCTGGATTT	7	+	304	1950
ENSDARG00000005518	ENSDART00000024433	8	4	4	CTCATCGCCCTGGGCTGGATTTTTG	7	+	307	1950
ENSDARG00000005518	ENSDART00000024433	8	7	7	ATCTTCCTCGCTCTGATGCCTTT	5	+	737	1950
ENSDARG00000005518	ENSDART00000024433	8	7	7	GTCATCTTCCTCGCTCTGATGCC	5	+	734	1950
ENSDARG00000005518	ENSDART00000024433	8	9	9	TACCCAAAATTAGTGGTGGAGCT	5	+	1066	1950
ENSDARG00000005518	ENSDART00000024433	8	9	9	TGCCTACCCAAAATTAGTGGTGGAG	7	+	1062	1950
ENSDARG00000005518	ENSDART00000024433	8	9	9	GCCTACCCAAAATTAGTGGTGGAG	6	+	1063	1950
ENSDARG00000005518	ENSDART00000024433	8	9	9	CTACCCAAAATTAGTGGTGGAGCT	6	+	1065	1950
ENSDARG00000005518	ENSDART00000024433	8	12	12	ACCTGCGTCCCAGCCTGCTGAAGGA	7	+	1514	1950
ENSDARG00000005518	ENSDART00000024433	8	12	12	TGCGTCCCAGCCTGCTGAAGGATGT	7	+	1517	1950
ENSDARG00000005518	ENSDART00000024433	8	13	13	GAAGACCACATGTGGAAGACTGT	5	+	1876	1950
ENSDARG00000005518	ENSDART00000024433	8	13	13	CAAGACACAGTAAGGAGGAGCGTGT	7	+	1658	1950
ENSDARG00000005518	ENSDART00000024433	8	13	13	AAACAAGACCTGACTGAGGAGGAA	6	+	1816	1950
ENSDARG00000005648	ENSDART00000061155	8	3	3	TTCTACACAGTGGAGACGGTGAG	5	+	214	747
ENSDARG00000005648	ENSDART00000061155	8	3	3	TGCCGCTGCAAGTGTGTGATGAG	5	+	133	747
ENSDARG00000005648	ENSDART00000061155	8	3	3	CTCAACCCCTGTGAGAATGAGTG	5	+	283	747
ENSDARG00000005648	ENSDART00000061155	8	3	3	CTAGACTCCGTGACGGAAGCTTGC	6	+	179	747
ENSDARG00000005648	ENSDART00000061155	8	3	3	CACTCAACCCCTGTGAGAATGAGTG	7	+	281	747
ENSDARG00000005648	ENSDART00000084439	8	1	1	CTCAACCCCTGTGAGAATGAGTG	5	+	211	1860
ENSDARG00000005648	ENSDART00000084439	8	1	1	CACTCAACCCCTGTGAGAATGAGTG	7	+	209	1860
ENSDARG00000005648	ENSDART00000084439	8	1	1	TGCCGCTGCAAGTGTGTGATGAG	5	+	61	1860
ENSDARG00000005648	ENSDART00000084439	8	1	1	TTCTACACAGTGGAGACGGTGAG	5	+	142	1860
ENSDARG00000005648	ENSDART00000084439	8	1	1	CTAGACTCCGTGACGGAAGCTTGC	6	+	107	1860
ENSDARG00000005648	ENSDART00000084439	8	4	4	CAAAGCAGCAAAACCTGCGAAGCC	6	+	714	1860
ENSDARG00000005648	ENSDART00000084439	8	5	5	AACCACCACTACGCTTGTGGCTGTC	7	+	978	1860
ENSDARG00000005648	ENSDART00000084439	8	5	5	AACCACCACTACGCTTGTGGCTGT	6	+	978	1860
ENSDARG00000005648	ENSDART00000084439	8	7	7	TCCCAAAGATAAAGTGCTGTATGC	6	+	1803	1860
ENSDARG00000005648	ENSDART00000084439	8	7	7	CCCAGCTTCACGATGCCGTCTAC	5	+	1418	1860
ENSDARG00000005648	ENSDART00000084439	8	7	7	CACTCAGACATCGATTTTGCTGTG	6	+	1471	1860
ENSDARG00000005648	ENSDART00000084439	8	7	7	ATCATCAAATATGACCTGCGCATGC	7	+	1375	1860
ENSDARG00000005648	ENSDART00000084439	8	7	7	ACAATCAGAAAGAAGGCGAGGTT	5	+	1688	1860
ENSDARG00000005648	ENSDART00000084439	8	7	7	AACTGCTTCATCGTGTGCGGCGTC	6	+	1645	1860
ENSDARG00000005704	ENSDART00000026159	8	6	6	GGCATCTCCTCCTTGCTGAATAG	5	-	512	975
ENSDARG00000005704	ENSDART00000026159	8	8	8	GTTGACGTCATTGAATGGAGGGGGA	7	-	783	975
ENSDARG00000005704	ENSDART00000099512	8	6	6	GGCATCTCCTCCTTGCTGAATAG	5	-	512	933
ENSDARG00000005704	ENSDART00000099512	8	8	8	GTTGACGTCATTGAATGGAGGGGGA	7	-	783	933
ENSDARG00000005704	ENSDART00000099515	8	6	6	GGCATCTCCTCCTTGCTGAATAG	5	-	512	1884
ENSDARG00000005704	ENSDART00000099515	8	8	8	GTTGACGTCATTGAATGGAGGGGGA	7	-	783	1884
ENSDARG00000005704	ENSDART00000099515	8	11	11	AACAAAGTCAGGAGCAGGAGGGTTT	7	-	1029	1884
ENSDARG00000005704	ENSDART00000099515	8	11	11	TTACAAAACCAAGGGAGGAGAAGAG	7	-	1060	1884
ENSDARG00000005704	ENSDART00000099515	8	11	11	TACAAAACCAAGGGAGGAGAAGAG	6	-	1060	1884
ENSDARG00000005704	ENSDART00000099515	8	12	12	CCCAGCAGCTGCAGAGCATTTTCT	6	-	1137	1884
ENSDARG00000005704	ENSDART00000099515	8	15	15	AAATCACCCTCATGAGGAGCGGCA	6	-	1442	1884
ENSDARG00000005704	ENSDART00000099515	8	15	15	ATCACCCTCATGAGGAGCGGCAGCT	7	-	1439	1884
ENSDARG00000005704	ENSDART00000099515	8	18	18	TACTGCGACTGTGGATCTGACGCT	6	-	1834	1884
ENSDARG00000005772	ENSDART00000025214	8	2	1	GAACACCTCACGTGTGGACGATGAG	7	-	21	546
ENSDARG00000005772	ENSDART00000025214	8	3	2	GAACGCTCCACCGAAGCCGTTGTC	6	-	100	546
ENSDARG00000005772	ENSDART00000025214	8	3	2	ACCATCCACTCCGCCTTCTGCTGAC	7	-	125	546
ENSDARG00000005772	ENSDART00000025214	8	4	3	GCCATCATCCACCACTGTGTTGAAC	7	-	237	546
ENSDARG00000005772	ENSDART00000025214	8	4	3	GCCATCATCCACCACTGTGTTGAA	6	-	238	546
ENSDARG00000005772	ENSDART00000025214	8	5	4	ATCATCATCATCCTGAGGTGTTT	5	-	401	546
ENSDARG00000005772	ENSDART00000025214	8	5	4	ATCATCATCCTGAGGTGTTTGTG	5	-	398	546
ENSDARG00000005772	ENSDART00000025214	8	5	4	ATCATCATCATCCTGAGGTGTTTGT	7	-	399	546
ENSDARG00000005772	ENSDART00000025214	8	6	5	TCCTTCACAATCCATAGCCTGAGGA	7	-	435	546
ENSDARG00000005776	ENSDART00000022959	8	2	1	CACTCAAAACTACCGGTCTGGGTC	6	-	17	669
ENSDARG00000005776	ENSDART00000022959	8	3	2	ATCTTCCTCTCCCGGCCGAGGAT	5	-	134	669
ENSDARG00000005776	ENSDART00000022959	8	3	2	TTCCTCTCCCGGCCGAGGATTTC	5	-	131	669
ENSDARG00000005776	ENSDART00000022959	8	6	5	GTCAACATCCAAGATGCAGATGAG	6	-	373	669
ENSDARG00000005776	ENSDART00000079989	8	1	1	CACTCAAAACTACCGGTCTGGGTC	6	-	17	591
ENSDARG00000005776	ENSDART00000079989	8	2	2	ATCTTCCTCTCCCGGCCGAGGAT	5	-	134	591
ENSDARG00000005776	ENSDART00000079989	8	2	2	TTCCTCTCCCGGCCGAGGATTTC	5	-	131	591
ENSDARG00000005776	ENSDART00000079989	8	4	4	GTCAACATCCAAGATGCAGATGAG	6	-	295	591
ENSDARG00000005780	ENSDART00000015833	8	1	1	GTTCCAGTCGAAAATGGTGTTGAA	6	-	817	1125
ENSDARG00000005780	ENSDART00000015833	8	1	1	GTTTCCATCCGGTGGGATGAATAA	6	-	389	1125
ENSDARG00000005780	ENSDART00000015833	8	1	1	TACTGCTACGGCCAGGTATGAGTG	6	-	424	1125
ENSDARG00000005780	ENSDART00000015833	8	1	1	TGCAAATAAAATGATCGCTGAAGGG	7	-	541	1125
ENSDARG00000005780	ENSDART00000015833	8	1	1	TTCAGCTCCTTCTGGAAGTTGTT	5	-	946	1125
ENSDARG00000005780	ENSDART00000015833	8	1	1	GCCGGCCCCCAGCAGCGGCATCT	5	-	982	1125
ENSDARG00000005780	ENSDART00000015833	8	1	1	GCACACTAAGCAAACGAGGATGTC	6	-	220	1125
ENSDARG00000005780	ENSDART00000015833	8	1	1	GACGACCACTAGGCATGTGTTGCC	6	-	133	1125
ENSDARG00000005780	ENSDART00000015833	8	1	1	CTAAGCAAACGAGGATGTCGGAGCA	7	-	214	1125
ENSDARG00000005780	ENSDART00000015833	8	1	1	AGCTCCTTCTGGAAGTTGTTGTT	5	-	943	1125
ENSDARG00000005780	ENSDART00000015833	8	1	1	ACCCACTGCCAGCATTGTGCTGTA	6	-	103	1125
ENSDARG00000005780	ENSDART00000015833	8	1	1	ACACTAAGCAAACGAGGATGTCGGA	7	-	217	1125
ENSDARG00000005780	ENSDART00000015833	8	1	1	AAATCCAGCGATCCATTAGAGTGT	6	-	263	1125
ENSDARG00000005887	ENSDART00000003686	8	1	1	TGCGGCTTCAATGCAGGAGGACGAG	7	+	57	645
ENSDARG00000005887	ENSDART00000003686	8	3	3	TTCCTAAAAAGCTAGCGTTTGCT	5	+	245	645
ENSDARG00000005887	ENSDART00000003686	8	3	3	TACTCCTTCATAGAGTTTGGTAA	5	+	337	645
ENSDARG00000005887	ENSDART00000003686	8	3	3	GTTTCCTAAAAAGCTAGCGTTTGCT	7	+	243	645
ENSDARG00000005887	ENSDART00000003686	8	5	5	GTTTACATCCGTTTCTGGTGGCTGT	7	+	631	645
ENSDARG00000005916	ENSDART00000004279	8	5	5	ATCCAATTACATGGGTCTGCCTCT	6	+	474	1785
ENSDARG00000005916	ENSDART00000004279	8	5	5	ATCAAATCCAATTACATGGGTCTGC	7	+	469	1785
ENSDARG00000005916	ENSDART00000004279	8	6	6	AGAGGCCACGATATGGCAGAAGGC	6	+	639	1785
ENSDARG00000005916	ENSDART00000004279	8	8	8	ACCTGCAGAGGATGGAGGAGCTGGA	7	+	803	1785
ENSDARG00000005916	ENSDART00000004279	8	8	8	GGCAGCAGCAACTGCTGGATGAGAG	7	+	770	1785
ENSDARG00000005916	ENSDART00000004279	8	10	10	ACAAACAAACTTTGTGTCTGTTTTG	7	+	1008	1785
ENSDARG00000005916	ENSDART00000004279	8	10	10	AAAAACAAACAAACTTTGTGTCTGT	7	+	1004	1785
ENSDARG00000005916	ENSDART00000004279	8	10	10	AAAAACAAACAAACTTTGTGTCT	5	+	1004	1785
ENSDARG00000005916	ENSDART00000004279	8	11	11	AACGGCTACGGCCCGCTGCGTTT	5	+	1102	1785
ENSDARG00000005916	ENSDART00000004279	8	11	11	GTCAGCTACCTCTGAGTCGGCTCT	6	+	1170	1785
ENSDARG00000005916	ENSDART00000004279	8	11	11	CTCTACAGAGCGATCGCTGCTTTC	6	+	1212	1785
ENSDARG00000005916	ENSDART00000004279	8	11	11	AACGGCTACGGCCCGCTGCGTTTCT	7	+	1102	1785
ENSDARG00000005916	ENSDART00000004279	8	12	12	TCCAGCTTACTCTGCTGCTGATTTC	7	+	1239	1785
ENSDARG00000005989	ENSDART00000010604	8	2	2	GTTAGCGGCCTGCTGAATTTGGA	5	-	212	2412
ENSDARG00000005989	ENSDART00000010604	8	6	6	GTCAACCTCGAAGGAGAAGAAGTC	6	-	802	2412
ENSDARG00000005989	ENSDART00000010604	8	6	6	CCCCAAGGCAAAACGGGTTGATGTA	7	-	745	2412
ENSDARG00000005989	ENSDART00000010604	8	6	6	CCCCAAGGCAAAACGGGTTGATGT	6	-	746	2412
ENSDARG00000005989	ENSDART00000010604	8	7	7	ATCTGCCGCTGACGGAGGATAGTGC	7	-	998	2412
ENSDARG00000005989	ENSDART00000010604	8	7	7	CGCAAATGCGGGCGTATCTGCCGCT	7	-	1013	2412
ENSDARG00000005989	ENSDART00000010604	8	13	13	GCATACCTCTCCTCCTCTGAGTAC	6	-	1578	2412
ENSDARG00000005989	ENSDART00000010604	8	13	13	GCAAGCAGACTGCAGGAGCTTAA	5	-	1496	2412
ENSDARG00000005989	ENSDART00000010604	8	15	15	CTCCCCAGAGCTGCCAGTAGGAGGC	7	-	1746	2412
ENSDARG00000005989	ENSDART00000010604	8	16	16	GACGCCAGAGAAATGGAGGCGCT	5	-	1927	2412
ENSDARG00000005989	ENSDART00000010604	8	17	17	CTCGCCCTCCAGGTTGTGTTTGGTC	7	-	2166	2412
ENSDARG00000005989	ENSDART00000010604	8	17	17	CTCGCCCTCCAGGTTGTGTTTGGT	6	-	2167	2412
ENSDARG00000005989	ENSDART00000010604	8	18	18	AGACGCAGCAGGAAGTCGAAGTT	5	-	2290	2412
ENSDARG00000005989	ENSDART00000010604	8	18	18	AGCTGCAGCGGCTGCGGAGCTGAA	6	-	2336	2412
ENSDARG00000005989	ENSDART00000010604	8	18	18	GTAGACGCAGCAGGAAGTCGAAGTT	7	-	2290	2412
ENSDARG00000005989	ENSDART00000010604	8	18	18	GTAAAACACATTAGCGTTGTCGGG	6	-	2248	2412
ENSDARG00000006021	ENSDART00000026050	8	1	1	TCCAAAGGCTCTGGTGGGATGGA	5	+	34	3312
ENSDARG00000006021	ENSDART00000026050	8	1	1	GGCTCCAAAGGCTCTGGTGGGAT	5	+	31	3312
ENSDARG00000006021	ENSDART00000026050	8	4	4	CTCTTCAGACAGGAAGTTTGGTGTT	7	+	282	3312
ENSDARG00000006021	ENSDART00000026050	8	4	4	ACCTGCAGAACTACAAGCTGTTGCT	7	+	359	3312
ENSDARG00000006021	ENSDART00000026050	8	4	4	CTCTTCAGACAGGAAGTTTGGTGT	6	+	282	3312
ENSDARG00000006021	ENSDART00000026050	8	8	8	ACAACCAGCCGCCCGGAGGTAAC	5	+	923	3312
ENSDARG00000006021	ENSDART00000026050	8	8	8	TTCCACACATACCGGCTGGGGGA	5	+	884	3312
ENSDARG00000006021	ENSDART00000026050	8	8	8	AACACCTCCAGCCTGATTATGAGAA	7	+	799	3312
ENSDARG00000006021	ENSDART00000026050	8	8	8	CGCTTCCACACATACCGGCTGGGGG	7	+	881	3312
ENSDARG00000006021	ENSDART00000026050	8	10	10	ACAAACTAAGACCCAAGCAGATGAA	7	+	1070	3312
ENSDARG00000006021	ENSDART00000026050	8	13	13	CAACTCTAAATTCGAGTCTGGAAAC	7	+	1776	3312
ENSDARG00000006021	ENSDART00000026050	8	16	16	TACACCTACTCAATGCTGAAGGT	5	+	2188	3312
ENSDARG00000006021	ENSDART00000026050	8	17	17	AGATGCATCTCCAGAAGTTGAGTGC	7	+	2207	3312
ENSDARG00000006021	ENSDART00000026050	8	18	18	AACTCCAGCTGGGTGATGAAGGG	5	+	2410	3312
ENSDARG00000006021	ENSDART00000026050	8	20	20	TACGGCTGCAGTATTAAGGAGAC	5	+	2719	3312
ENSDARG00000006021	ENSDART00000026050	8	21	21	AGAAGCCACGGCGCGTGTGGTGGT	6	+	2880	3312
ENSDARG00000006021	ENSDART00000026050	8	21	21	TCCAGCTGCAGTTTTGTGGTGGAA	6	+	2848	3312
ENSDARG00000006021	ENSDART00000026050	8	21	21	TCCAGCTGCAGTTTTGTGGTGGA	5	+	2848	3312
ENSDARG00000006021	ENSDART00000026050	8	21	21	AGCCACGGCGCGTGTGGTGGTGTG	6	+	2883	3312
ENSDARG00000006021	ENSDART00000026050	8	21	21	AGAAGCCACGGCGCGTGTGGTGGTG	7	+	2880	3312
ENSDARG00000006021	ENSDART00000026050	8	22	22	ACAACCACAACTCTCATCTGCTGGA	7	+	3077	3312
ENSDARG00000006021	ENSDART00000026050	8	22	22	AACCACAACTCTCATCTGCTGGA	5	+	3079	3312
ENSDARG00000006021	ENSDART00000026050	8	23	23	GTCCCACCACATACGTATTGGAT	5	+	3149	3312
ENSDARG00000006074	ENSDART00000002186	8	1	1	TTCCTCATCGGGGTAGCCGGCGGC	6	+	76	783
ENSDARG00000006074	ENSDART00000002186	8	4	4	CCCAGCAGACGTGGTTTTATTTGAA	7	+	396	783
ENSDARG00000006074	ENSDART00000002186	8	5	5	AGAGACATCAGTGAGAGAGGCCGTG	7	+	520	783
ENSDARG00000006074	ENSDART00000002186	8	6	6	TTAGACAAAAAAGTATGCTGATGTG	7	+	609	783
ENSDARG00000006074	ENSDART00000002186	8	7	7	TCCGTCAGAGTCCAGCAGCAGGC	5	+	765	783
ENSDARG00000006074	ENSDART00000002186	8	7	7	TTCAGCACATCCAGGATTTTTTG	5	+	680	783
ENSDARG00000006074	ENSDART00000002186	8	7	7	TTCAGCACATCCAGGATTTTTTGAA	7	+	680	783
ENSDARG00000006109	ENSDART00000003307	8	1	1	TGCCTATTAGATGAAAGACTTTGTA	7	-	28	777
ENSDARG00000006109	ENSDART00000003307	8	2	2	TTCTCCAGCTTGATGTCGCTGTG	5	-	370	777
ENSDARG00000006109	ENSDART00000003307	8	2	2	TCCAGCAGCTGTATTATTTGAGGAA	7	-	173	777
ENSDARG00000006109	ENSDART00000003307	8	2	2	TACCACAGAATGTTGTGTAGCCTAA	7	-	463	777
ENSDARG00000006109	ENSDART00000003307	8	2	2	GTTCACAGCAAGCGTTTGCAGCA	5	-	336	777
ENSDARG00000006109	ENSDART00000003307	8	2	2	GTCCACACACGCTCTGGGGCGCT	5	-	236	777
ENSDARG00000006109	ENSDART00000003307	8	2	2	ACATACCACAGAATGTTGTGTAGCC	7	-	466	777
ENSDARG00000006109	ENSDART00000003307	8	2	2	ACATACCACAGAATGTTGTGTAG	5	-	468	777
ENSDARG00000006109	ENSDART00000003307	8	4	4	TTCCTAATCGTTTCTTCTGTTGTT	6	-	769	777
ENSDARG00000006109	ENSDART00000053288	8	2	2	TGCCTATTAGATGAAAGACTTTGTA	7	-	58	855
ENSDARG00000006109	ENSDART00000053288	8	4	4	TCCAGCAGCTGTATTATTTGAGGAA	7	-	254	855
ENSDARG00000006109	ENSDART00000053288	8	4	4	TACCACAGAATGTTGTGTAGCCTAA	7	-	544	855
ENSDARG00000006109	ENSDART00000053288	8	4	4	GTTCACAGCAAGCGTTTGCAGCA	5	-	417	855
ENSDARG00000006109	ENSDART00000053288	8	4	4	GTCCACACACGCTCTGGGGCGCT	5	-	317	855
ENSDARG00000006109	ENSDART00000053288	8	4	4	ACATACCACAGAATGTTGTGTAGCC	7	-	547	855
ENSDARG00000006109	ENSDART00000053288	8	4	4	ACATACCACAGAATGTTGTGTAG	5	-	549	855
ENSDARG00000006109	ENSDART00000053288	8	4	4	TTCTCCAGCTTGATGTCGCTGTG	5	-	451	855
ENSDARG00000006109	ENSDART00000053288	8	6	6	TTCCTAATCGTTTCTTCTGTTGTT	6	-	847	855
ENSDARG00000006124	ENSDART00000040943	8	2	2	GCAGCCACCGTTTGCTGTGGAGGTG	7	+	162	4239
ENSDARG00000006124	ENSDART00000040943	8	2	2	GGCAGCCACCGTTTGCTGTGGAG	5	+	161	4239
ENSDARG00000006124	ENSDART00000040943	8	2	2	GGCAGCCACCGTTTGCTGTGGAGGT	7	+	161	4239
ENSDARG00000006124	ENSDART00000040943	8	2	2	GCAGCCACCGTTTGCTGTGGAGGT	6	+	162	4239
ENSDARG00000006124	ENSDART00000040943	8	6	6	GACCTAAAATGATGGGCCTTGGTC	6	+	731	4239
ENSDARG00000006124	ENSDART00000040943	8	7	7	CTCATCATCAAGGAGGATGTCGAT	6	+	817	4239
ENSDARG00000006124	ENSDART00000040943	8	8	8	TTACCACACATTCTGCCTGATAC	5	+	1020	4239
ENSDARG00000006124	ENSDART00000040943	8	9	9	GTAAAAAGCCATCAGAGGCATTC	5	+	1103	4239
ENSDARG00000006124	ENSDART00000040943	8	10	10	CACTCAAAAGAATTTGGTAGTGGTT	7	+	1309	4239
ENSDARG00000006124	ENSDART00000040943	8	10	10	CTCAAAAGAATTTGGTAGTGGTT	5	+	1311	4239
ENSDARG00000006124	ENSDART00000040943	8	12	12	AGCTGCAGAGAAGTTGGAGGAGGTG	7	+	1596	4239
ENSDARG00000006124	ENSDART00000040943	8	12	12	TTCAGCTGCAGAGAAGTTGGAGGA	6	+	1593	4239
ENSDARG00000006124	ENSDART00000040943	8	12	12	AGCTGCAGAGAAGTTGGAGGAGGT	6	+	1596	4239
ENSDARG00000006124	ENSDART00000040943	8	13	13	AACTTCTGCACTGCAGATTGGGTA	6	+	1822	4239
ENSDARG00000006124	ENSDART00000040943	8	14	14	CTCACCTGCAAGATGGCGGCCTGC	6	+	1915	4239
ENSDARG00000006124	ENSDART00000040943	8	14	14	GAACTCACCTGCAAGATGGCGGC	5	+	1912	4239
ENSDARG00000006124	ENSDART00000040943	8	14	14	AAAGCCTACTGGAAAGGGTGAGAG	6	+	2021	4239
ENSDARG00000006124	ENSDART00000040943	8	14	14	GCCGCCACACACAGGGAGATGTT	5	+	1966	4239
ENSDARG00000006124	ENSDART00000040943	8	14	14	AGCCGCCACACACAGGGAGATGTT	6	+	1965	4239
ENSDARG00000006124	ENSDART00000040943	8	17	17	CTCAGCAACAGCCAGAGCAGTAGAA	7	+	2473	4239
ENSDARG00000006124	ENSDART00000040943	8	19	19	TGCCCCAGCTTGTGAGCTTTTGAG	6	+	2697	4239
ENSDARG00000006124	ENSDART00000040943	8	21	21	AGCAAAACCTTTCTGAAGAAGAA	5	+	3211	4239
ENSDARG00000006124	ENSDART00000040943	8	21	21	GCCAGCAAAACCTTTCTGAAGAA	5	+	3208	4239
ENSDARG00000006124	ENSDART00000040943	8	23	23	TCCGCCTCCAGCAGGTTAATTTGGC	7	+	3425	4239
ENSDARG00000006124	ENSDART00000040943	8	23	23	CTCCTCCGCCTCCAGCAGGTTAA	5	+	3421	4239
ENSDARG00000006124	ENSDART00000040943	8	23	23	GCCTCCAGCAGGTTAATTTGGCGAA	7	+	3428	4239
ENSDARG00000006124	ENSDART00000040943	8	23	23	CCCTCCTCCGCCTCCAGCAGGTTAA	7	+	3419	4239
ENSDARG00000006124	ENSDART00000040943	8	24	24	TTACAAAACCCCTCTGCTGGTGGG	6	+	3626	4239
ENSDARG00000006124	ENSDART00000040943	8	24	24	AAACTATTCTAGCGCTGCTGGTGGC	7	+	3707	4239
ENSDARG00000006124	ENSDART00000040943	8	24	24	TACGGCTGCCAGAGGGAGAAGCG	5	+	3749	4239
ENSDARG00000006124	ENSDART00000040943	8	24	24	TACAAAACCCCTCTGCTGGTGGGAC	7	+	3627	4239
ENSDARG00000006124	ENSDART00000040943	8	24	24	CTAGCCAAACTGTGTGTATTTGTG	6	+	3497	4239
ENSDARG00000006124	ENSDART00000040943	8	24	24	TACAAAACCCCTCTGCTGGTGGG	5	+	3627	4239
ENSDARG00000006124	ENSDART00000040943	8	24	24	ACAAAACCCCTCTGCTGGTGGGAC	6	+	3628	4239
ENSDARG00000006124	ENSDART00000040943	8	24	24	CCCCTCTGCTGGTGGGACTGGAAC	6	+	3634	4239
ENSDARG00000006124	ENSDART00000040943	8	24	24	CACTCCAGAAGTACAGGAGGCGCT	6	+	3831	4239
ENSDARG00000006124	ENSDART00000040943	8	24	24	GACTGCAACAAGTAGAGGATGAA	5	+	3860	4239
ENSDARG00000006124	ENSDART00000040943	8	24	24	CAAAACCCCTCTGCTGGTGGGAC	5	+	3629	4239
ENSDARG00000006124	ENSDART00000040943	8	24	24	ACAGACTGCAACAAGTAGAGGAT	5	+	3857	4239
ENSDARG00000006124	ENSDART00000040943	8	25	25	CACTCATACAGGTAAGGGAGGAGTG	7	+	4229	4239
ENSDARG00000006124	ENSDART00000049306	8	3	3	GCCAGCAAAACCTTTCTGAAGAA	5	+	460	1380
ENSDARG00000006124	ENSDART00000049306	8	3	3	AGCAAAACCTTTCTGAAGAAGAA	5	+	463	1380
ENSDARG00000006124	ENSDART00000049306	8	5	5	GCCTCCAGCAGGTTAATTTGGCGAA	7	+	680	1380
ENSDARG00000006124	ENSDART00000049306	8	5	5	TACAAAACCCCTCTGCTGGTGGG	5	+	978	1380
ENSDARG00000006124	ENSDART00000049306	8	5	5	TACAAAACCCCTCTGCTGGTGGGAC	7	+	978	1380
ENSDARG00000006124	ENSDART00000049306	8	5	5	TACGGCTGCCAGAGGGAGAAGCG	5	+	1100	1380
ENSDARG00000006124	ENSDART00000049306	8	5	5	TCCGCCTCCAGCAGGTTAATTTGGC	7	+	677	1380
ENSDARG00000006124	ENSDART00000049306	8	5	5	TTACAAAACCCCTCTGCTGGTGGG	6	+	977	1380
ENSDARG00000006124	ENSDART00000049306	8	5	5	GACTGCAACAAGTAGAGGATGAA	5	+	1211	1380
ENSDARG00000006124	ENSDART00000049306	8	5	5	CTCCTCCGCCTCCAGCAGGTTAA	5	+	673	1380
ENSDARG00000006124	ENSDART00000049306	8	5	5	CTAGCCAAACTGTGTGTATTTGTG	6	+	848	1380
ENSDARG00000006124	ENSDART00000049306	8	5	5	AAACTATTCTAGCGCTGCTGGTGGC	7	+	1058	1380
ENSDARG00000006124	ENSDART00000049306	8	5	5	ACAAAACCCCTCTGCTGGTGGGAC	6	+	979	1380
ENSDARG00000006124	ENSDART00000049306	8	5	5	ACAGACTGCAACAAGTAGAGGAT	5	+	1208	1380
ENSDARG00000006124	ENSDART00000049306	8	5	5	CAAAACCCCTCTGCTGGTGGGAC	5	+	980	1380
ENSDARG00000006124	ENSDART00000049306	8	5	5	CACTCCAGAAGTACAGGAGGCGCT	6	+	1182	1380
ENSDARG00000006124	ENSDART00000049306	8	5	5	CCCCTCTGCTGGTGGGACTGGAAC	6	+	985	1380
ENSDARG00000006124	ENSDART00000049306	8	5	5	CCCTCCTCCGCCTCCAGCAGGTTAA	7	+	671	1380
ENSDARG00000006124	ENSDART00000088367	8	2	2	GCAGCCACCGTTTGCTGTGGAGGT	6	+	162	4134
ENSDARG00000006124	ENSDART00000088367	8	2	2	GGCAGCCACCGTTTGCTGTGGAG	5	+	161	4134
ENSDARG00000006124	ENSDART00000088367	8	2	2	GGCAGCCACCGTTTGCTGTGGAGGT	7	+	161	4134
ENSDARG00000006124	ENSDART00000088367	8	2	2	GCAGCCACCGTTTGCTGTGGAGGTG	7	+	162	4134
ENSDARG00000006124	ENSDART00000088367	8	5	5	GACCTAAAATGATGGGCCTTGGTC	6	+	608	4134
ENSDARG00000006124	ENSDART00000088367	8	6	6	CTCATCATCAAGGAGGATGTCGAT	6	+	694	4134
ENSDARG00000006124	ENSDART00000088367	8	7	7	TTACCACACATTCTGCCTGATAC	5	+	897	4134
ENSDARG00000006124	ENSDART00000088367	8	8	8	GTAAAAAGCCATCAGAGGCATTC	5	+	980	4134
ENSDARG00000006124	ENSDART00000088367	8	9	9	CACTCAAAAGAATTTGGTAGTGGTT	7	+	1186	4134
ENSDARG00000006124	ENSDART00000088367	8	9	9	CTCAAAAGAATTTGGTAGTGGTT	5	+	1188	4134
ENSDARG00000006124	ENSDART00000088367	8	11	11	AGCTGCAGAGAAGTTGGAGGAGGTG	7	+	1473	4134
ENSDARG00000006124	ENSDART00000088367	8	11	11	TTCAGCTGCAGAGAAGTTGGAGGA	6	+	1470	4134
ENSDARG00000006124	ENSDART00000088367	8	11	11	AGCTGCAGAGAAGTTGGAGGAGGT	6	+	1473	4134
ENSDARG00000006124	ENSDART00000088367	8	12	12	AACTTCTGCACTGCAGATTGGGTA	6	+	1699	4134
ENSDARG00000006124	ENSDART00000088367	8	13	13	GAACTCACCTGCAAGATGGCGGC	5	+	1789	4134
ENSDARG00000006124	ENSDART00000088367	8	13	13	GCCGCCACACACAGGGAGATGTT	5	+	1843	4134
ENSDARG00000006124	ENSDART00000088367	8	13	13	CTCACCTGCAAGATGGCGGCCTGC	6	+	1792	4134
ENSDARG00000006124	ENSDART00000088367	8	13	13	AGCCGCCACACACAGGGAGATGTT	6	+	1842	4134
ENSDARG00000006124	ENSDART00000088367	8	13	13	AAAGCCTACTGGAAAGGGTGAGAG	6	+	1898	4134
ENSDARG00000006124	ENSDART00000088367	8	16	16	CTCAGCAACAGCCAGAGCAGTAGAA	7	+	2350	4134
ENSDARG00000006124	ENSDART00000088367	8	18	18	TGCCCCAGCTTGTGAGCTTTTGAG	6	+	2574	4134
ENSDARG00000006124	ENSDART00000088367	8	20	20	GCCAGCAAAACCTTTCTGAAGAA	5	+	3085	4134
ENSDARG00000006124	ENSDART00000088367	8	20	20	AGCAAAACCTTTCTGAAGAAGAA	5	+	3088	4134
ENSDARG00000006124	ENSDART00000088367	8	22	22	GCCTCCAGCAGGTTAATTTGGCGAA	7	+	3305	4134
ENSDARG00000006124	ENSDART00000088367	8	22	22	CTCCTCCGCCTCCAGCAGGTTAA	5	+	3298	4134
ENSDARG00000006124	ENSDART00000088367	8	22	22	CCCTCCTCCGCCTCCAGCAGGTTAA	7	+	3296	4134
ENSDARG00000006124	ENSDART00000088367	8	22	22	TCCGCCTCCAGCAGGTTAATTTGGC	7	+	3302	4134
ENSDARG00000006124	ENSDART00000088367	8	23	23	TACAAAACCCCTCTGCTGGTGGGAC	7	+	3510	4134
ENSDARG00000006124	ENSDART00000088367	8	23	23	TACGGCTGCCAGAGGGAGAAGCG	5	+	3632	4134
ENSDARG00000006124	ENSDART00000088367	8	23	23	TTACAAAACCCCTCTGCTGGTGGG	6	+	3509	4134
ENSDARG00000006124	ENSDART00000088367	8	23	23	AAACTATTCTAGCGCTGCTGGTGGC	7	+	3590	4134
ENSDARG00000006124	ENSDART00000088367	8	23	23	TACAAAACCCCTCTGCTGGTGGG	5	+	3510	4134
ENSDARG00000006124	ENSDART00000088367	8	23	23	ACAAAACCCCTCTGCTGGTGGGAC	6	+	3511	4134
ENSDARG00000006124	ENSDART00000088367	8	23	23	ACAGACTGCAACAAGTAGAGGAT	5	+	3740	4134
ENSDARG00000006124	ENSDART00000088367	8	23	23	CTAGCCAAACTGTGTGTATTTGTG	6	+	3380	4134
ENSDARG00000006124	ENSDART00000088367	8	23	23	CACTCCAGAAGTACAGGAGGCGCT	6	+	3714	4134
ENSDARG00000006124	ENSDART00000088367	8	23	23	CAAAACCCCTCTGCTGGTGGGAC	5	+	3512	4134
ENSDARG00000006124	ENSDART00000088367	8	23	23	CCCCTCTGCTGGTGGGACTGGAAC	6	+	3517	4134
ENSDARG00000006124	ENSDART00000088367	8	23	23	GACTGCAACAAGTAGAGGATGAA	5	+	3743	4134
ENSDARG00000006124	ENSDART00000088367	8	25	25	CACTCATACAGGTAAGGGAGGAGTG	7	+	4124	4134
ENSDARG00000006124	ENSDART00000088374	8	2	2	GCAGCCACCGTTTGCTGTGGAGGT	6	+	162	4251
ENSDARG00000006124	ENSDART00000088374	8	2	2	GGCAGCCACCGTTTGCTGTGGAG	5	+	161	4251
ENSDARG00000006124	ENSDART00000088374	8	2	2	GGCAGCCACCGTTTGCTGTGGAGGT	7	+	161	4251
ENSDARG00000006124	ENSDART00000088374	8	2	2	GCAGCCACCGTTTGCTGTGGAGGTG	7	+	162	4251
ENSDARG00000006124	ENSDART00000088374	8	6	6	GACCTAAAATGATGGGCCTTGGTC	6	+	731	4251
ENSDARG00000006124	ENSDART00000088374	8	7	7	CTCATCATCAAGGAGGATGTCGAT	6	+	817	4251
ENSDARG00000006124	ENSDART00000088374	8	8	8	TTACCACACATTCTGCCTGATAC	5	+	1020	4251
ENSDARG00000006124	ENSDART00000088374	8	9	9	GTAAAAAGCCATCAGAGGCATTC	5	+	1103	4251
ENSDARG00000006124	ENSDART00000088374	8	10	10	CACTCAAAAGAATTTGGTAGTGGTT	7	+	1309	4251
ENSDARG00000006124	ENSDART00000088374	8	10	10	CTCAAAAGAATTTGGTAGTGGTT	5	+	1311	4251
ENSDARG00000006124	ENSDART00000088374	8	12	12	AGCTGCAGAGAAGTTGGAGGAGGT	6	+	1596	4251
ENSDARG00000006124	ENSDART00000088374	8	12	12	AGCTGCAGAGAAGTTGGAGGAGGTG	7	+	1596	4251
ENSDARG00000006124	ENSDART00000088374	8	12	12	TTCAGCTGCAGAGAAGTTGGAGGA	6	+	1593	4251
ENSDARG00000006124	ENSDART00000088374	8	13	13	AACTTCTGCACTGCAGATTGGGTA	6	+	1822	4251
ENSDARG00000006124	ENSDART00000088374	8	14	14	GAACTCACCTGCAAGATGGCGGC	5	+	1912	4251
ENSDARG00000006124	ENSDART00000088374	8	14	14	CTCACCTGCAAGATGGCGGCCTGC	6	+	1915	4251
ENSDARG00000006124	ENSDART00000088374	8	14	14	GCCGCCACACACAGGGAGATGTT	5	+	1966	4251
ENSDARG00000006124	ENSDART00000088374	8	14	14	AGCCGCCACACACAGGGAGATGTT	6	+	1965	4251
ENSDARG00000006124	ENSDART00000088374	8	14	14	AAAGCCTACTGGAAAGGGTGAGAG	6	+	2021	4251
ENSDARG00000006124	ENSDART00000088374	8	17	17	CTCAGCAACAGCCAGAGCAGTAGAA	7	+	2473	4251
ENSDARG00000006124	ENSDART00000088374	8	19	19	TGCCCCAGCTTGTGAGCTTTTGAG	6	+	2697	4251
ENSDARG00000006124	ENSDART00000088374	8	21	21	AGCAAAACCTTTCTGAAGAAGAA	5	+	3211	4251
ENSDARG00000006124	ENSDART00000088374	8	21	21	GCCAGCAAAACCTTTCTGAAGAA	5	+	3208	4251
ENSDARG00000006124	ENSDART00000088374	8	23	23	GCCTCCAGCAGGTTAATTTGGCGAA	7	+	3428	4251
ENSDARG00000006124	ENSDART00000088374	8	23	23	TCCGCCTCCAGCAGGTTAATTTGGC	7	+	3425	4251
ENSDARG00000006124	ENSDART00000088374	8	23	23	CTCCTCCGCCTCCAGCAGGTTAA	5	+	3421	4251
ENSDARG00000006124	ENSDART00000088374	8	23	23	CCCTCCTCCGCCTCCAGCAGGTTAA	7	+	3419	4251
ENSDARG00000006124	ENSDART00000088374	8	24	24	GACTGCAACAAGTAGAGGATGAA	5	+	3860	4251
ENSDARG00000006124	ENSDART00000088374	8	24	24	AAACTATTCTAGCGCTGCTGGTGGC	7	+	3707	4251
ENSDARG00000006124	ENSDART00000088374	8	24	24	ACAAAACCCCTCTGCTGGTGGGAC	6	+	3628	4251
ENSDARG00000006124	ENSDART00000088374	8	24	24	TTACAAAACCCCTCTGCTGGTGGG	6	+	3626	4251
ENSDARG00000006124	ENSDART00000088374	8	24	24	ACAGACTGCAACAAGTAGAGGAT	5	+	3857	4251
ENSDARG00000006124	ENSDART00000088374	8	24	24	TACGGCTGCCAGAGGGAGAAGCG	5	+	3749	4251
ENSDARG00000006124	ENSDART00000088374	8	24	24	TACAAAACCCCTCTGCTGGTGGGAC	7	+	3627	4251
ENSDARG00000006124	ENSDART00000088374	8	24	24	TACAAAACCCCTCTGCTGGTGGG	5	+	3627	4251
ENSDARG00000006124	ENSDART00000088374	8	24	24	CAAAACCCCTCTGCTGGTGGGAC	5	+	3629	4251
ENSDARG00000006124	ENSDART00000088374	8	24	24	CCCCTCTGCTGGTGGGACTGGAAC	6	+	3634	4251
ENSDARG00000006124	ENSDART00000088374	8	24	24	CACTCCAGAAGTACAGGAGGCGCT	6	+	3831	4251
ENSDARG00000006124	ENSDART00000088374	8	24	24	CTAGCCAAACTGTGTGTATTTGTG	6	+	3497	4251
ENSDARG00000006124	ENSDART00000088374	8	26	26	CACTCATACAGGTAAGGGAGGAGTG	7	+	4241	4251
ENSDARG00000006124	ENSDART00000088376	8	2	2	GCAGCCACCGTTTGCTGTGGAGGTG	7	+	162	4257
ENSDARG00000006124	ENSDART00000088376	8	2	2	GCAGCCACCGTTTGCTGTGGAGGT	6	+	162	4257
ENSDARG00000006124	ENSDART00000088376	8	2	2	GGCAGCCACCGTTTGCTGTGGAG	5	+	161	4257
ENSDARG00000006124	ENSDART00000088376	8	2	2	GGCAGCCACCGTTTGCTGTGGAGGT	7	+	161	4257
ENSDARG00000006124	ENSDART00000088376	8	6	6	GACCTAAAATGATGGGCCTTGGTC	6	+	731	4257
ENSDARG00000006124	ENSDART00000088376	8	7	7	CTCATCATCAAGGAGGATGTCGAT	6	+	817	4257
ENSDARG00000006124	ENSDART00000088376	8	8	8	TTACCACACATTCTGCCTGATAC	5	+	1020	4257
ENSDARG00000006124	ENSDART00000088376	8	9	9	GTAAAAAGCCATCAGAGGCATTC	5	+	1103	4257
ENSDARG00000006124	ENSDART00000088376	8	10	10	CTCAAAAGAATTTGGTAGTGGTT	5	+	1311	4257
ENSDARG00000006124	ENSDART00000088376	8	10	10	CACTCAAAAGAATTTGGTAGTGGTT	7	+	1309	4257
ENSDARG00000006124	ENSDART00000088376	8	12	12	AGCTGCAGAGAAGTTGGAGGAGGTG	7	+	1596	4257
ENSDARG00000006124	ENSDART00000088376	8	12	12	TTCAGCTGCAGAGAAGTTGGAGGA	6	+	1593	4257
ENSDARG00000006124	ENSDART00000088376	8	12	12	AGCTGCAGAGAAGTTGGAGGAGGT	6	+	1596	4257
ENSDARG00000006124	ENSDART00000088376	8	13	13	AACTTCTGCACTGCAGATTGGGTA	6	+	1822	4257
ENSDARG00000006124	ENSDART00000088376	8	14	14	GAACTCACCTGCAAGATGGCGGC	5	+	1912	4257
ENSDARG00000006124	ENSDART00000088376	8	14	14	AAAGCCTACTGGAAAGGGTGAGAG	6	+	2021	4257
ENSDARG00000006124	ENSDART00000088376	8	14	14	GCCGCCACACACAGGGAGATGTT	5	+	1966	4257
ENSDARG00000006124	ENSDART00000088376	8	14	14	AGCCGCCACACACAGGGAGATGTT	6	+	1965	4257
ENSDARG00000006124	ENSDART00000088376	8	14	14	CTCACCTGCAAGATGGCGGCCTGC	6	+	1915	4257
ENSDARG00000006124	ENSDART00000088376	8	17	17	CTCAGCAACAGCCAGAGCAGTAGAA	7	+	2473	4257
ENSDARG00000006124	ENSDART00000088376	8	19	19	TGCCCCAGCTTGTGAGCTTTTGAG	6	+	2697	4257
ENSDARG00000006124	ENSDART00000088376	8	21	21	AGCAAAACCTTTCTGAAGAAGAA	5	+	3211	4257
ENSDARG00000006124	ENSDART00000088376	8	21	21	GCCAGCAAAACCTTTCTGAAGAA	5	+	3208	4257
ENSDARG00000006124	ENSDART00000088376	8	23	23	GCCTCCAGCAGGTTAATTTGGCGAA	7	+	3428	4257
ENSDARG00000006124	ENSDART00000088376	8	23	23	TCCGCCTCCAGCAGGTTAATTTGGC	7	+	3425	4257
ENSDARG00000006124	ENSDART00000088376	8	23	23	CTCCTCCGCCTCCAGCAGGTTAA	5	+	3421	4257
ENSDARG00000006124	ENSDART00000088376	8	23	23	CCCTCCTCCGCCTCCAGCAGGTTAA	7	+	3419	4257
ENSDARG00000006124	ENSDART00000088376	8	24	24	TACAAAACCCCTCTGCTGGTGGGAC	7	+	3633	4257
ENSDARG00000006124	ENSDART00000088376	8	24	24	TACAAAACCCCTCTGCTGGTGGG	5	+	3633	4257
ENSDARG00000006124	ENSDART00000088376	8	24	24	TTACAAAACCCCTCTGCTGGTGGG	6	+	3632	4257
ENSDARG00000006124	ENSDART00000088376	8	24	24	TACGGCTGCCAGAGGGAGAAGCG	5	+	3755	4257
ENSDARG00000006124	ENSDART00000088376	8	24	24	GACTGCAACAAGTAGAGGATGAA	5	+	3866	4257
ENSDARG00000006124	ENSDART00000088376	8	24	24	AAACTATTCTAGCGCTGCTGGTGGC	7	+	3713	4257
ENSDARG00000006124	ENSDART00000088376	8	24	24	ACAAAACCCCTCTGCTGGTGGGAC	6	+	3634	4257
ENSDARG00000006124	ENSDART00000088376	8	24	24	ACAGACTGCAACAAGTAGAGGAT	5	+	3863	4257
ENSDARG00000006124	ENSDART00000088376	8	24	24	CAAAACCCCTCTGCTGGTGGGAC	5	+	3635	4257
ENSDARG00000006124	ENSDART00000088376	8	24	24	CACTCCAGAAGTACAGGAGGCGCT	6	+	3837	4257
ENSDARG00000006124	ENSDART00000088376	8	24	24	CCCCTCTGCTGGTGGGACTGGAAC	6	+	3640	4257
ENSDARG00000006124	ENSDART00000088376	8	24	24	CTAGCCAAACTGTGTGTATTTGTG	6	+	3503	4257
ENSDARG00000006124	ENSDART00000088376	8	26	26	CACTCATACAGGTAAGGGAGGAGTG	7	+	4247	4257
ENSDARG00000006124	ENSDART00000098646	8	3	3	AGCAAAACCTTTCTGAAGAAGAA	5	+	358	1383
ENSDARG00000006124	ENSDART00000098646	8	3	3	GCCAGCAAAACCTTTCTGAAGAA	5	+	355	1383
ENSDARG00000006124	ENSDART00000098646	8	5	5	CTCCTCCGCCTCCAGCAGGTTAA	5	+	568	1383
ENSDARG00000006124	ENSDART00000098646	8	5	5	GCCTCCAGCAGGTTAATTTGGCGAA	7	+	575	1383
ENSDARG00000006124	ENSDART00000098646	8	5	5	TCCGCCTCCAGCAGGTTAATTTGGC	7	+	572	1383
ENSDARG00000006124	ENSDART00000098646	8	5	5	CCCTCCTCCGCCTCCAGCAGGTTAA	7	+	566	1383
ENSDARG00000006124	ENSDART00000098646	8	6	6	CACTCCAGAAGTACAGGAGGCGCT	6	+	984	1383
ENSDARG00000006124	ENSDART00000098646	8	6	6	TTACAAAACCCCTCTGCTGGTGGG	6	+	779	1383
ENSDARG00000006124	ENSDART00000098646	8	6	6	AAACTATTCTAGCGCTGCTGGTGGC	7	+	860	1383
ENSDARG00000006124	ENSDART00000098646	8	6	6	TACGGCTGCCAGAGGGAGAAGCG	5	+	902	1383
ENSDARG00000006124	ENSDART00000098646	8	6	6	TACAAAACCCCTCTGCTGGTGGGAC	7	+	780	1383
ENSDARG00000006124	ENSDART00000098646	8	6	6	TACAAAACCCCTCTGCTGGTGGG	5	+	780	1383
ENSDARG00000006124	ENSDART00000098646	8	6	6	ACAAAACCCCTCTGCTGGTGGGAC	6	+	781	1383
ENSDARG00000006124	ENSDART00000098646	8	6	6	ACAGACTGCAACAAGTAGAGGAT	5	+	1010	1383
ENSDARG00000006124	ENSDART00000098646	8	6	6	GACTGCAACAAGTAGAGGATGAA	5	+	1013	1383
ENSDARG00000006124	ENSDART00000098646	8	6	6	CAAAACCCCTCTGCTGGTGGGAC	5	+	782	1383
ENSDARG00000006124	ENSDART00000098646	8	6	6	CTAGCCAAACTGTGTGTATTTGTG	6	+	650	1383
ENSDARG00000006124	ENSDART00000098646	8	6	6	CCCCTCTGCTGGTGGGACTGGAAC	6	+	787	1383
ENSDARG00000006124	ENSDART00000098646	8	8	8	GTTTACAAAAATATGTCTGTCTTC	6	+	1101	1383
ENSDARG00000006124	ENSDART00000098646	8	9	9	CACTCATACAGGTAAGGGAGGAGTG	7	+	1373	1383
ENSDARG00000006124	ENSDART00000098651	8	2	2	GCAGCCACCGTTTGCTGTGGAGGT	6	+	162	4260
ENSDARG00000006124	ENSDART00000098651	8	2	2	GGCAGCCACCGTTTGCTGTGGAGGT	7	+	161	4260
ENSDARG00000006124	ENSDART00000098651	8	2	2	GGCAGCCACCGTTTGCTGTGGAG	5	+	161	4260
ENSDARG00000006124	ENSDART00000098651	8	2	2	GCAGCCACCGTTTGCTGTGGAGGTG	7	+	162	4260
ENSDARG00000006124	ENSDART00000098651	8	6	6	GACCTAAAATGATGGGCCTTGGTC	6	+	731	4260
ENSDARG00000006124	ENSDART00000098651	8	7	7	CTCATCATCAAGGAGGATGTCGAT	6	+	817	4260
ENSDARG00000006124	ENSDART00000098651	8	8	8	TTACCACACATTCTGCCTGATAC	5	+	1020	4260
ENSDARG00000006124	ENSDART00000098651	8	9	9	GTAAAAAGCCATCAGAGGCATTC	5	+	1103	4260
ENSDARG00000006124	ENSDART00000098651	8	10	10	CTCAAAAGAATTTGGTAGTGGTT	5	+	1311	4260
ENSDARG00000006124	ENSDART00000098651	8	10	10	CACTCAAAAGAATTTGGTAGTGGTT	7	+	1309	4260
ENSDARG00000006124	ENSDART00000098651	8	12	12	TTCAGCTGCAGAGAAGTTGGAGGA	6	+	1593	4260
ENSDARG00000006124	ENSDART00000098651	8	12	12	AGCTGCAGAGAAGTTGGAGGAGGT	6	+	1596	4260
ENSDARG00000006124	ENSDART00000098651	8	12	12	AGCTGCAGAGAAGTTGGAGGAGGTG	7	+	1596	4260
ENSDARG00000006124	ENSDART00000098651	8	13	13	AACTTCTGCACTGCAGATTGGGTA	6	+	1822	4260
ENSDARG00000006124	ENSDART00000098651	8	14	14	AGCCGCCACACACAGGGAGATGTT	6	+	1965	4260
ENSDARG00000006124	ENSDART00000098651	8	14	14	GCCGCCACACACAGGGAGATGTT	5	+	1966	4260
ENSDARG00000006124	ENSDART00000098651	8	14	14	AAAGCCTACTGGAAAGGGTGAGAG	6	+	2021	4260
ENSDARG00000006124	ENSDART00000098651	8	14	14	GAACTCACCTGCAAGATGGCGGC	5	+	1912	4260
ENSDARG00000006124	ENSDART00000098651	8	14	14	CTCACCTGCAAGATGGCGGCCTGC	6	+	1915	4260
ENSDARG00000006124	ENSDART00000098651	8	17	17	CTCAGCAACAGCCAGAGCAGTAGAA	7	+	2473	4260
ENSDARG00000006124	ENSDART00000098651	8	19	19	TGCCCCAGCTTGTGAGCTTTTGAG	6	+	2697	4260
ENSDARG00000006124	ENSDART00000098651	8	21	21	GCCAGCAAAACCTTTCTGAAGAA	5	+	3208	4260
ENSDARG00000006124	ENSDART00000098651	8	21	21	AGCAAAACCTTTCTGAAGAAGAA	5	+	3211	4260
ENSDARG00000006124	ENSDART00000098651	8	23	23	GCCTCCAGCAGGTTAATTTGGCGAA	7	+	3428	4260
ENSDARG00000006124	ENSDART00000098651	8	23	23	TCCGCCTCCAGCAGGTTAATTTGGC	7	+	3425	4260
ENSDARG00000006124	ENSDART00000098651	8	23	23	CTCCTCCGCCTCCAGCAGGTTAA	5	+	3421	4260
ENSDARG00000006124	ENSDART00000098651	8	23	23	CCCTCCTCCGCCTCCAGCAGGTTAA	7	+	3419	4260
ENSDARG00000006124	ENSDART00000098651	8	24	24	ACAGACTGCAACAAGTAGAGGAT	5	+	3863	4260
ENSDARG00000006124	ENSDART00000098651	8	24	24	TTACAAAACCCCTCTGCTGGTGGG	6	+	3632	4260
ENSDARG00000006124	ENSDART00000098651	8	24	24	CAAAACCCCTCTGCTGGTGGGAC	5	+	3635	4260
ENSDARG00000006124	ENSDART00000098651	8	24	24	AAACTATTCTAGCGCTGCTGGTGGC	7	+	3713	4260
ENSDARG00000006124	ENSDART00000098651	8	24	24	TACGGCTGCCAGAGGGAGAAGCG	5	+	3755	4260
ENSDARG00000006124	ENSDART00000098651	8	24	24	TACAAAACCCCTCTGCTGGTGGGAC	7	+	3633	4260
ENSDARG00000006124	ENSDART00000098651	8	24	24	TACAAAACCCCTCTGCTGGTGGG	5	+	3633	4260
ENSDARG00000006124	ENSDART00000098651	8	24	24	CACTCCAGAAGTACAGGAGGCGCT	6	+	3837	4260
ENSDARG00000006124	ENSDART00000098651	8	24	24	CCCCTCTGCTGGTGGGACTGGAAC	6	+	3640	4260
ENSDARG00000006124	ENSDART00000098651	8	24	24	CTAGCCAAACTGTGTGTATTTGTG	6	+	3503	4260
ENSDARG00000006124	ENSDART00000098651	8	24	24	GACTGCAACAAGTAGAGGATGAA	5	+	3866	4260
ENSDARG00000006124	ENSDART00000098651	8	24	24	ACAAAACCCCTCTGCTGGTGGGAC	6	+	3634	4260
ENSDARG00000006124	ENSDART00000098651	8	26	26	CACTCATACAGGTAAGGGAGGAGTG	7	+	4250	4260
ENSDARG00000006124	ENSDART00000098654	8	2	2	GCAGCCACCGTTTGCTGTGGAGGT	6	+	165	4269
ENSDARG00000006124	ENSDART00000098654	8	2	2	GCAGCCACCGTTTGCTGTGGAGGTG	7	+	165	4269
ENSDARG00000006124	ENSDART00000098654	8	2	2	GGCAGCCACCGTTTGCTGTGGAGGT	7	+	164	4269
ENSDARG00000006124	ENSDART00000098654	8	2	2	GGCAGCCACCGTTTGCTGTGGAG	5	+	164	4269
ENSDARG00000006124	ENSDART00000098654	8	6	6	GACCTAAAATGATGGGCCTTGGTC	6	+	734	4269
ENSDARG00000006124	ENSDART00000098654	8	7	7	CTCATCATCAAGGAGGATGTCGAT	6	+	838	4269
ENSDARG00000006124	ENSDART00000098654	8	8	8	TTACCACACATTCTGCCTGATAC	5	+	1041	4269
ENSDARG00000006124	ENSDART00000098654	8	9	9	GTAAAAAGCCATCAGAGGCATTC	5	+	1124	4269
ENSDARG00000006124	ENSDART00000098654	8	10	10	CTCAAAAGAATTTGGTAGTGGTT	5	+	1332	4269
ENSDARG00000006124	ENSDART00000098654	8	10	10	CACTCAAAAGAATTTGGTAGTGGTT	7	+	1330	4269
ENSDARG00000006124	ENSDART00000098654	8	12	12	AGCTGCAGAGAAGTTGGAGGAGGT	6	+	1617	4269
ENSDARG00000006124	ENSDART00000098654	8	12	12	AGCTGCAGAGAAGTTGGAGGAGGTG	7	+	1617	4269
ENSDARG00000006124	ENSDART00000098654	8	12	12	TTCAGCTGCAGAGAAGTTGGAGGA	6	+	1614	4269
ENSDARG00000006124	ENSDART00000098654	8	13	13	AACTTCTGCACTGCAGATTGGGTA	6	+	1843	4269
ENSDARG00000006124	ENSDART00000098654	8	14	14	GAACTCACCTGCAAGATGGCGGC	5	+	1933	4269
ENSDARG00000006124	ENSDART00000098654	8	14	14	CTCACCTGCAAGATGGCGGCCTGC	6	+	1936	4269
ENSDARG00000006124	ENSDART00000098654	8	14	14	GCCGCCACACACAGGGAGATGTT	5	+	1987	4269
ENSDARG00000006124	ENSDART00000098654	8	14	14	AGCCGCCACACACAGGGAGATGTT	6	+	1986	4269
ENSDARG00000006124	ENSDART00000098654	8	14	14	AAAGCCTACTGGAAAGGGTGAGAG	6	+	2042	4269
ENSDARG00000006124	ENSDART00000098654	8	17	17	CTCAGCAACAGCCAGAGCAGTAGAA	7	+	2494	4269
ENSDARG00000006124	ENSDART00000098654	8	18	18	TGCCCCAGCTTGTGAGCTTTTGAG	6	+	2745	4269
ENSDARG00000006124	ENSDART00000098654	8	20	20	AGCAAAACCTTTCTGAAGAAGAA	5	+	3259	4269
ENSDARG00000006124	ENSDART00000098654	8	20	20	GCCAGCAAAACCTTTCTGAAGAA	5	+	3256	4269
ENSDARG00000006124	ENSDART00000098654	8	22	22	GCCTCCAGCAGGTTAATTTGGCGAA	7	+	3476	4269
ENSDARG00000006124	ENSDART00000098654	8	22	22	TCCGCCTCCAGCAGGTTAATTTGGC	7	+	3473	4269
ENSDARG00000006124	ENSDART00000098654	8	22	22	CTCCTCCGCCTCCAGCAGGTTAA	5	+	3469	4269
ENSDARG00000006124	ENSDART00000098654	8	22	22	CCCTCCTCCGCCTCCAGCAGGTTAA	7	+	3467	4269
ENSDARG00000006124	ENSDART00000098654	8	23	23	CTAGCCAAACTGTGTGTATTTGTG	6	+	3530	4269
ENSDARG00000006124	ENSDART00000098654	8	23	23	TACGGCTGCCAGAGGGAGAAGCG	5	+	3782	4269
ENSDARG00000006124	ENSDART00000098654	8	23	23	TTACAAAACCCCTCTGCTGGTGGG	6	+	3659	4269
ENSDARG00000006124	ENSDART00000098654	8	23	23	AAACTATTCTAGCGCTGCTGGTGGC	7	+	3740	4269
ENSDARG00000006124	ENSDART00000098654	8	23	23	TACAAAACCCCTCTGCTGGTGGGAC	7	+	3660	4269
ENSDARG00000006124	ENSDART00000098654	8	23	23	TACAAAACCCCTCTGCTGGTGGG	5	+	3660	4269
ENSDARG00000006124	ENSDART00000098654	8	23	23	ACAAAACCCCTCTGCTGGTGGGAC	6	+	3661	4269
ENSDARG00000006124	ENSDART00000098654	8	23	23	CCCCTCTGCTGGTGGGACTGGAAC	6	+	3667	4269
ENSDARG00000006124	ENSDART00000098654	8	23	23	CACTCCAGAAGTACAGGAGGCGCT	6	+	3864	4269
ENSDARG00000006124	ENSDART00000098654	8	23	23	GACTGCAACAAGTAGAGGATGAA	5	+	3893	4269
ENSDARG00000006124	ENSDART00000098654	8	23	23	CAAAACCCCTCTGCTGGTGGGAC	5	+	3662	4269
ENSDARG00000006124	ENSDART00000098654	8	23	23	ACAGACTGCAACAAGTAGAGGAT	5	+	3890	4269
ENSDARG00000006124	ENSDART00000098654	8	24	24	GACTCCAAAATATTGCTGGGTAA	5	+	3968	4269
ENSDARG00000006124	ENSDART00000098654	8	27	27	CACTCATACAGGTAAGGGAGGAGTG	7	+	4259	4269
ENSDARG00000006124	ENSDART00000098656	8	2	2	GCAGCCACCGTTTGCTGTGGAGGT	6	+	165	4305
ENSDARG00000006124	ENSDART00000098656	8	2	2	GCAGCCACCGTTTGCTGTGGAGGTG	7	+	165	4305
ENSDARG00000006124	ENSDART00000098656	8	2	2	GGCAGCCACCGTTTGCTGTGGAGGT	7	+	164	4305
ENSDARG00000006124	ENSDART00000098656	8	2	2	GGCAGCCACCGTTTGCTGTGGAG	5	+	164	4305
ENSDARG00000006124	ENSDART00000098656	8	6	6	GACCTAAAATGATGGGCCTTGGTC	6	+	734	4305
ENSDARG00000006124	ENSDART00000098656	8	7	7	CTCATCATCAAGGAGGATGTCGAT	6	+	838	4305
ENSDARG00000006124	ENSDART00000098656	8	8	8	TTACCACACATTCTGCCTGATAC	5	+	1041	4305
ENSDARG00000006124	ENSDART00000098656	8	9	9	GTAAAAAGCCATCAGAGGCATTC	5	+	1124	4305
ENSDARG00000006124	ENSDART00000098656	8	10	10	CTCAAAAGAATTTGGTAGTGGTT	5	+	1332	4305
ENSDARG00000006124	ENSDART00000098656	8	10	10	CACTCAAAAGAATTTGGTAGTGGTT	7	+	1330	4305
ENSDARG00000006124	ENSDART00000098656	8	12	12	AGCTGCAGAGAAGTTGGAGGAGGTG	7	+	1617	4305
ENSDARG00000006124	ENSDART00000098656	8	12	12	TTCAGCTGCAGAGAAGTTGGAGGA	6	+	1614	4305
ENSDARG00000006124	ENSDART00000098656	8	12	12	AGCTGCAGAGAAGTTGGAGGAGGT	6	+	1617	4305
ENSDARG00000006124	ENSDART00000098656	8	13	13	AACTTCTGCACTGCAGATTGGGTA	6	+	1843	4305
ENSDARG00000006124	ENSDART00000098656	8	14	14	GAACTCACCTGCAAGATGGCGGC	5	+	1933	4305
ENSDARG00000006124	ENSDART00000098656	8	14	14	AAAGCCTACTGGAAAGGGTGAGAG	6	+	2042	4305
ENSDARG00000006124	ENSDART00000098656	8	14	14	GCCGCCACACACAGGGAGATGTT	5	+	1987	4305
ENSDARG00000006124	ENSDART00000098656	8	14	14	AGCCGCCACACACAGGGAGATGTT	6	+	1986	4305
ENSDARG00000006124	ENSDART00000098656	8	14	14	CTCACCTGCAAGATGGCGGCCTGC	6	+	1936	4305
ENSDARG00000006124	ENSDART00000098656	8	17	17	CTCAGCAACAGCCAGAGCAGTAGAA	7	+	2494	4305
ENSDARG00000006124	ENSDART00000098656	8	18	18	TGCCCCAGCTTGTGAGCTTTTGAG	6	+	2745	4305
ENSDARG00000006124	ENSDART00000098656	8	20	20	AGCAAAACCTTTCTGAAGAAGAA	5	+	3259	4305
ENSDARG00000006124	ENSDART00000098656	8	20	20	GCCAGCAAAACCTTTCTGAAGAA	5	+	3256	4305
ENSDARG00000006124	ENSDART00000098656	8	22	22	TCCGCCTCCAGCAGGTTAATTTGGC	7	+	3473	4305
ENSDARG00000006124	ENSDART00000098656	8	22	22	GCCTCCAGCAGGTTAATTTGGCGAA	7	+	3476	4305
ENSDARG00000006124	ENSDART00000098656	8	22	22	CTCCTCCGCCTCCAGCAGGTTAA	5	+	3469	4305
ENSDARG00000006124	ENSDART00000098656	8	22	22	CCCTCCTCCGCCTCCAGCAGGTTAA	7	+	3467	4305
ENSDARG00000006124	ENSDART00000098656	8	23	23	TACAAAACCCCTCTGCTGGTGGGAC	7	+	3681	4305
ENSDARG00000006124	ENSDART00000098656	8	23	23	TACGGCTGCCAGAGGGAGAAGCG	5	+	3803	4305
ENSDARG00000006124	ENSDART00000098656	8	23	23	TTACAAAACCCCTCTGCTGGTGGG	6	+	3680	4305
ENSDARG00000006124	ENSDART00000098656	8	23	23	TACAAAACCCCTCTGCTGGTGGG	5	+	3681	4305
ENSDARG00000006124	ENSDART00000098656	8	23	23	AAACTATTCTAGCGCTGCTGGTGGC	7	+	3761	4305
ENSDARG00000006124	ENSDART00000098656	8	23	23	CACTCCAGAAGTACAGGAGGCGCT	6	+	3885	4305
ENSDARG00000006124	ENSDART00000098656	8	23	23	CTAGCCAAACTGTGTGTATTTGTG	6	+	3551	4305
ENSDARG00000006124	ENSDART00000098656	8	23	23	ACAGACTGCAACAAGTAGAGGAT	5	+	3911	4305
ENSDARG00000006124	ENSDART00000098656	8	23	23	CCCCTCTGCTGGTGGGACTGGAAC	6	+	3688	4305
ENSDARG00000006124	ENSDART00000098656	8	23	23	ACAAAACCCCTCTGCTGGTGGGAC	6	+	3682	4305
ENSDARG00000006124	ENSDART00000098656	8	23	23	GACTGCAACAAGTAGAGGATGAA	5	+	3914	4305
ENSDARG00000006124	ENSDART00000098656	8	23	23	CAAAACCCCTCTGCTGGTGGGAC	5	+	3683	4305
ENSDARG00000006124	ENSDART00000098656	8	25	25	CACTCATACAGGTAAGGGAGGAGTG	7	+	4295	4305
ENSDARG00000006124	ENSDART00000098657	8	2	2	GCAGCCACCGTTTGCTGTGGAGGT	6	+	165	4389
ENSDARG00000006124	ENSDART00000098657	8	2	2	GGCAGCCACCGTTTGCTGTGGAG	5	+	164	4389
ENSDARG00000006124	ENSDART00000098657	8	2	2	GCAGCCACCGTTTGCTGTGGAGGTG	7	+	165	4389
ENSDARG00000006124	ENSDART00000098657	8	2	2	GGCAGCCACCGTTTGCTGTGGAGGT	7	+	164	4389
ENSDARG00000006124	ENSDART00000098657	8	10	10	GACCTAAAATGATGGGCCTTGGTC	6	+	806	4389
ENSDARG00000006124	ENSDART00000098657	8	11	11	CTCATCATCAAGGAGGATGTCGAT	6	+	892	4389
ENSDARG00000006124	ENSDART00000098657	8	12	12	TTACCACACATTCTGCCTGATAC	5	+	1095	4389
ENSDARG00000006124	ENSDART00000098657	8	13	13	GTAAAAAGCCATCAGAGGCATTC	5	+	1178	4389
ENSDARG00000006124	ENSDART00000098657	8	14	14	CTCAAAAGAATTTGGTAGTGGTT	5	+	1386	4389
ENSDARG00000006124	ENSDART00000098657	8	14	14	CACTCAAAAGAATTTGGTAGTGGTT	7	+	1384	4389
ENSDARG00000006124	ENSDART00000098657	8	16	16	AGCTGCAGAGAAGTTGGAGGAGGTG	7	+	1671	4389
ENSDARG00000006124	ENSDART00000098657	8	16	16	AGCTGCAGAGAAGTTGGAGGAGGT	6	+	1671	4389
ENSDARG00000006124	ENSDART00000098657	8	16	16	TTCAGCTGCAGAGAAGTTGGAGGA	6	+	1668	4389
ENSDARG00000006124	ENSDART00000098657	8	17	17	AACTTCTGCACTGCAGATTGGGTA	6	+	1897	4389
ENSDARG00000006124	ENSDART00000098657	8	18	18	CTCACCTGCAAGATGGCGGCCTGC	6	+	1990	4389
ENSDARG00000006124	ENSDART00000098657	8	18	18	AGCCGCCACACACAGGGAGATGTT	6	+	2040	4389
ENSDARG00000006124	ENSDART00000098657	8	18	18	GCCGCCACACACAGGGAGATGTT	5	+	2041	4389
ENSDARG00000006124	ENSDART00000098657	8	18	18	AAAGCCTACTGGAAAGGGTGAGAG	6	+	2096	4389
ENSDARG00000006124	ENSDART00000098657	8	18	18	GAACTCACCTGCAAGATGGCGGC	5	+	1987	4389
ENSDARG00000006124	ENSDART00000098657	8	21	21	CTCAGCAACAGCCAGAGCAGTAGAA	7	+	2548	4389
ENSDARG00000006124	ENSDART00000098657	8	23	23	TGCCCCAGCTTGTGAGCTTTTGAG	6	+	2766	4389
ENSDARG00000006124	ENSDART00000098657	8	25	25	GCCAGCAAAACCTTTCTGAAGAA	5	+	3277	4389
ENSDARG00000006124	ENSDART00000098657	8	25	25	AGCAAAACCTTTCTGAAGAAGAA	5	+	3280	4389
ENSDARG00000006124	ENSDART00000098657	8	27	27	CTCCTCCGCCTCCAGCAGGTTAA	5	+	3490	4389
ENSDARG00000006124	ENSDART00000098657	8	27	27	TCCGCCTCCAGCAGGTTAATTTGGC	7	+	3494	4389
ENSDARG00000006124	ENSDART00000098657	8	27	27	GCCTCCAGCAGGTTAATTTGGCGAA	7	+	3497	4389
ENSDARG00000006124	ENSDART00000098657	8	27	27	CCCTCCTCCGCCTCCAGCAGGTTAA	7	+	3488	4389
ENSDARG00000006124	ENSDART00000098657	8	28	28	TTACAAAACCCCTCTGCTGGTGGG	6	+	3662	4389
ENSDARG00000006124	ENSDART00000098657	8	28	28	ACAGACTGCAACAAGTAGAGGAT	5	+	3893	4389
ENSDARG00000006124	ENSDART00000098657	8	28	28	ACAAAACCCCTCTGCTGGTGGGAC	6	+	3664	4389
ENSDARG00000006124	ENSDART00000098657	8	28	28	AAACTATTCTAGCGCTGCTGGTGGC	7	+	3743	4389
ENSDARG00000006124	ENSDART00000098657	8	28	28	CAAAACCCCTCTGCTGGTGGGAC	5	+	3665	4389
ENSDARG00000006124	ENSDART00000098657	8	28	28	TACGGCTGCCAGAGGGAGAAGCG	5	+	3785	4389
ENSDARG00000006124	ENSDART00000098657	8	28	28	TACAAAACCCCTCTGCTGGTGGGAC	7	+	3663	4389
ENSDARG00000006124	ENSDART00000098657	8	28	28	TACAAAACCCCTCTGCTGGTGGG	5	+	3663	4389
ENSDARG00000006124	ENSDART00000098657	8	28	28	CACTCCAGAAGTACAGGAGGCGCT	6	+	3867	4389
ENSDARG00000006124	ENSDART00000098657	8	28	28	CCCCTCTGCTGGTGGGACTGGAAC	6	+	3670	4389
ENSDARG00000006124	ENSDART00000098657	8	28	28	CTAGCCAAACTGTGTGTATTTGTG	6	+	3533	4389
ENSDARG00000006124	ENSDART00000098657	8	28	28	GACTGCAACAAGTAGAGGATGAA	5	+	3896	4389
ENSDARG00000006124	ENSDART00000098657	8	31	31	AGAGCCAGAAAACCGAAGGCGAG	5	+	4283	4389
ENSDARG00000006124	ENSDART00000098657	8	31	31	GGCTTCAGACTGCAAGAAGACGAA	6	+	4320	4389
ENSDARG00000006137	ENSDART00000016225	8	5	5	TGCTCAGGCATTCCAGGGTGCTGTG	7	-	614	855
ENSDARG00000006308	ENSDART00000014323	8	1	1	CTCCGCTTCTGTCATGGTTGGAC	5	-	57	1542
ENSDARG00000006308	ENSDART00000014323	8	17	17	CACGACTCCATTCGGCCGGTGGT	5	-	1521	1542
ENSDARG00000006508	ENSDART00000008215	8	4	2	ACACTCTCCACCACGTAGAAGTC	5	-	175	1584
ENSDARG00000006508	ENSDART00000008215	8	5	3	AACAGCTCCCGGAAGTAGCGGAA	5	-	280	1584
ENSDARG00000006508	ENSDART00000008215	8	6	4	GAACTCGGCCTCCTTGTGCTGGA	5	-	428	1584
ENSDARG00000006508	ENSDART00000008215	8	7	5	TGCATCTTCACTGATCGCGGCAGGA	7	-	581	1584
ENSDARG00000006508	ENSDART00000008215	8	8	6	GCCGTCTCCATCTCTGTGACTCT	5	-	839	1584
ENSDARG00000006508	ENSDART00000008215	8	9	7	TTCTCATCCCTGTGTGTTTTTGCA	6	-	987	1584
ENSDARG00000006508	ENSDART00000008215	8	10	8	TGCTCCAGCTTCTTGATGAATCT	5	-	1054	1584
ENSDARG00000006508	ENSDART00000008215	8	12	10	GTCTTCTCCTCTTTCTGTGAGGAC	6	-	1263	1584
ENSDARG00000006508	ENSDART00000008215	8	13	11	GAAAACAGAGGGCGGGGAGAGGGT	6	-	1420	1584
ENSDARG00000006508	ENSDART00000008215	8	13	11	AGAGGCTTCGTACGGGTGAGGAG	5	-	1385	1584
ENSDARG00000006508	ENSDART00000008215	8	14	12	GTAGACGTCGAGCACGGAGTCGTC	6	-	1567	1584
ENSDARG00000006508	ENSDART00000008215	8	14	12	GTAAAAGTCGAGCAGGCGCATCT	5	-	1483	1584
ENSDARG00000006508	ENSDART00000008215	8	14	12	AAACTCACAAAGTAGACGTCGAG	5	-	1579	1584
ENSDARG00000006508	ENSDART00000060786	8	1	1	ACACTCTCCACCACGTAGAAGTC	5	-	103	1263
ENSDARG00000006508	ENSDART00000060786	8	2	2	AACAGCTCCCGGAAGTAGCGGAA	5	-	208	1263
ENSDARG00000006508	ENSDART00000060786	8	3	3	GAACTCGGCCTCCTTGTGCTGGA	5	-	356	1263
ENSDARG00000006508	ENSDART00000060786	8	4	4	TGCATCTTCACTGATCGCGGCAGGA	7	-	509	1263
ENSDARG00000006508	ENSDART00000060786	8	5	5	GCCGTCTCCATCTCTGTGACTCT	5	-	767	1263
ENSDARG00000006508	ENSDART00000060786	8	7	7	TTCTCATCCCTGTGTGTTTTTGCA	6	-	921	1263
ENSDARG00000006508	ENSDART00000060786	8	8	8	TGCTCCAGCTTCTTGATGAATCT	5	-	988	1263
ENSDARG00000006508	ENSDART00000060786	8	10	10	GTCTTCTCCTCTTTCTGTGAGGAC	6	-	1197	1263
ENSDARG00000006577	ENSDART00000012994	8	4	3	TTAAAAGGCTGCAGGAGGCCGGC	5	-	355	1314
ENSDARG00000006577	ENSDART00000012994	8	4	3	AAAGGCTGCAGGAGGCCGGCGTC	5	-	352	1314
ENSDARG00000006577	ENSDART00000012994	8	6	5	CTCCTCCCAAACAAATGATGAAGTC	7	-	535	1314
ENSDARG00000006577	ENSDART00000012994	8	8	7	GCAGACGGCTGCGCAGGACGAGTGC	7	-	706	1314
ENSDARG00000006577	ENSDART00000012994	8	9	8	AAACAAGTCTACATTGGAGAGGTA	6	-	877	1314
ENSDARG00000006577	ENSDART00000012994	8	10	9	TCCGGCTGCCACTGCATAAGCTGTG	7	-	966	1314
ENSDARG00000006577	ENSDART00000012994	8	10	9	TTAAGCTCCACGCCGGCTGGAAC	5	-	1072	1314
ENSDARG00000006577	ENSDART00000012994	8	12	11	CTAGACAGAGGTGACTCTGCTTCT	6	-	1286	1314
ENSDARG00000006719	ENSDART00000014046	8	4	4	GAACTCTCCTCTGGAGGTGCTGGA	6	+	862	3408
ENSDARG00000006719	ENSDART00000014046	8	4	4	GACCGCCTCAATGCTCTGGGCTTTT	7	+	778	3408
ENSDARG00000006719	ENSDART00000014046	8	4	4	GCATTCATCAGATGGAGGAGAAC	5	+	1178	3408
ENSDARG00000006719	ENSDART00000014046	8	4	4	GTCAACAACGACCAGGCTGAGCT	5	+	1687	3408
ENSDARG00000006719	ENSDART00000014046	8	4	4	GTTGCCTACTCGGTAGATGAAGAC	6	+	1405	3408
ENSDARG00000006719	ENSDART00000014046	8	4	4	TCCACCAGCTCCTGGAGGGGGTG	5	+	1796	3408
ENSDARG00000006719	ENSDART00000014046	8	4	4	TCCACCAGCTCCTGGAGGGGGTGAG	7	+	1796	3408
ENSDARG00000006719	ENSDART00000014046	8	4	4	TTCATCATCCTCTGAGTCTGAAGGT	7	+	1071	3408
ENSDARG00000006719	ENSDART00000014046	8	4	4	CACAGCTGCGGATGTGGAGTCAAC	6	+	675	3408
ENSDARG00000006719	ENSDART00000014046	8	4	4	ATCATCCTCTGAGTCTGAAGGTGGC	7	+	1074	3408
ENSDARG00000006719	ENSDART00000014046	8	4	4	ACATCCACCAGCTCCTGGAGGGGGT	7	+	1793	3408
ENSDARG00000006719	ENSDART00000014046	8	4	4	AACGCCCGCTTTGAGCGTGAGCA	5	+	1483	3408
ENSDARG00000006719	ENSDART00000014046	8	5	5	ATCAGCGACCTGGAGAGTGGGTT	5	+	2113	3408
ENSDARG00000006719	ENSDART00000014046	8	6	6	TGCACCGCAGACTCCGGGTGAGTG	6	+	2186	3408
ENSDARG00000006719	ENSDART00000014046	8	7	7	AGAAGCCCAAGAGAAGAATGAGAA	6	+	2319	3408
ENSDARG00000006719	ENSDART00000014046	8	9	9	AAACCCCACCTGCTGCTGCCGTC	5	+	2684	3408
ENSDARG00000006719	ENSDART00000014046	8	9	9	TGCCGCCGCCGCTGCTGCAGCAGCC	7	+	2583	3408
ENSDARG00000006719	ENSDART00000014046	8	9	9	TGCTGCAGCAGCCGCTGCTGCTGTC	7	+	2595	3408
ENSDARG00000006719	ENSDART00000014046	8	9	9	AAAACCCCACCTGCTGCTGCCGTC	6	+	2683	3408
ENSDARG00000006719	ENSDART00000014046	8	9	9	GCCGCCGCCGCTGCTGCAGCAGCC	6	+	2584	3408
ENSDARG00000006719	ENSDART00000014046	8	9	9	CGCTGCTGCAGCAGCCGCTGCTGCT	7	+	2592	3408
ENSDARG00000006719	ENSDART00000014046	8	9	9	CGCCGCCGCTGCTGCAGCAGCCGCT	7	+	2586	3408
ENSDARG00000006719	ENSDART00000014046	8	9	9	CGCCGCTGCTGCAGCAGCCGCTGCT	7	+	2589	3408
ENSDARG00000006719	ENSDART00000014046	8	9	9	CGCTACTGCTGTCGCTGCCGCCGCC	7	+	2568	3408
ENSDARG00000006719	ENSDART00000014046	8	9	9	GAAAACCCCACCTGCTGCTGCCGTC	7	+	2682	3408
ENSDARG00000006719	ENSDART00000014046	8	9	9	CGCTGCCGCCGCCGCTGCTGCAGCA	7	+	2580	3408
ENSDARG00000006719	ENSDART00000014046	8	11	11	AGCATCTACTCAGAGCAGCCAAC	5	+	2813	3408
ENSDARG00000006719	ENSDART00000014046	8	11	11	ATCAAAGACCATCACAGGTGAAGAT	7	+	2880	3408
ENSDARG00000006719	ENSDART00000014046	8	12	12	GTCAACCCCACTGCACGAAGCCGCC	7	+	3022	3408
ENSDARG00000006719	ENSDART00000014046	8	12	12	CAACCCCACTGCACGAAGCCGCC	5	+	3024	3408
ENSDARG00000006719	ENSDART00000014046	8	12	12	CCCCACTGCACGAAGCCGCCTTC	5	+	3027	3408
ENSDARG00000006719	ENSDART00000014046	8	13	13	TCCAAAAGAAATGCACTGTTGAGGT	7	+	3100	3408
ENSDARG00000006719	ENSDART00000014046	8	15	15	TTCCAAGCAGCAGAAAGTGTGGGCA	7	+	3292	3408
ENSDARG00000006719	ENSDART00000014046	8	16	16	TCCATCTACAAGTATTTTGAGAC	5	+	3394	3408
ENSDARG00000006793	ENSDART00000018909	8	1	1	TACCACAGCGATGTTGGTGTTGCC	6	-	109	810
ENSDARG00000006793	ENSDART00000018909	8	1	1	GCATCAGGCAGGCAGGTTGACGCA	6	-	59	810
ENSDARG00000006793	ENSDART00000018909	8	1	1	GGCTGCGGCCTGCTTGGCGAGGAG	6	-	28	810
ENSDARG00000006793	ENSDART00000018909	8	1	1	CGCACCAGCATGGCTGCGGCCTGC	6	-	39	810
ENSDARG00000006793	ENSDART00000018909	8	4	4	GCATCATTCCCTGACCGTGGCTGAA	7	-	322	810
ENSDARG00000006793	ENSDART00000018909	8	5	5	TTATTCAACTTGCAGTCTTTGCC	5	-	448	810
ENSDARG00000006793	ENSDART00000018909	8	6	6	GCCTGCACCATGTTGGTGTTTGGC	6	-	621	810
ENSDARG00000006793	ENSDART00000018909	8	6	6	GCCTGCACCATGTTGGTGTTTGGCC	7	-	620	810
ENSDARG00000006793	ENSDART00000018909	8	6	6	GAACTCGACACGCTAGGAGAGGAG	6	-	536	810
ENSDARG00000006793	ENSDART00000018909	8	6	6	ACCGCCTGCACCATGTTGGTGTT	5	-	625	810
ENSDARG00000006793	ENSDART00000018909	8	7	7	GTCTCCCACATGAAGGTCGGAGTG	6	-	723	810
ENSDARG00000006793	ENSDART00000018909	8	7	7	GCCGTCAAAGATGTAGTGGTAGTG	6	-	754	810
ENSDARG00000006793	ENSDART00000101564	8	3	3	GCATCATTCCCTGACCGTGGCTGAA	7	-	202	690
ENSDARG00000006793	ENSDART00000101564	8	4	4	TTATTCAACTTGCAGTCTTTGCC	5	-	328	690
ENSDARG00000006793	ENSDART00000101564	8	5	5	GCCTGCACCATGTTGGTGTTTGGCC	7	-	500	690
ENSDARG00000006793	ENSDART00000101564	8	5	5	GCCTGCACCATGTTGGTGTTTGGC	6	-	501	690
ENSDARG00000006793	ENSDART00000101564	8	5	5	GAACTCGACACGCTAGGAGAGGAG	6	-	416	690
ENSDARG00000006793	ENSDART00000101564	8	5	5	ACCGCCTGCACCATGTTGGTGTT	5	-	505	690
ENSDARG00000006793	ENSDART00000101564	8	7	7	GCCGTCAAAGATGTAGTGGTAGTG	6	-	634	690
ENSDARG00000006793	ENSDART00000101564	8	7	7	GTCTCCCACATGAAGGTCGGAGTG	6	-	603	690
ENSDARG00000006823	ENSDART00000020068	8	1	1	CTCTGCAGAGTCCGCGTTGAGGGT	6	-	200	747
ENSDARG00000006823	ENSDART00000020068	8	1	1	TCCTCCGGCCCCCAGGTGGCAGTG	6	-	175	747
ENSDARG00000006823	ENSDART00000020068	8	2	2	GGCGTCTCCAGCCGAGGATTGGTGC	7	-	380	747
ENSDARG00000006823	ENSDART00000020068	8	2	2	GGCGTCTCCAGCCGAGGATTGGTG	6	-	381	747
ENSDARG00000006823	ENSDART00000020068	8	2	2	CTCCTCCTCTCTGATGCTGTTGTC	6	-	442	747
ENSDARG00000006823	ENSDART00000020068	8	2	2	TGCTCCTGCAGGAGTTTGCTGAT	5	-	499	747
ENSDARG00000006823	ENSDART00000020068	8	2	2	AGCGGCTCCTCCTCTCTGATGCT	5	-	448	747
ENSDARG00000006823	ENSDART00000020068	8	2	2	ACACACCCAGCGCTGGCAGCAGTG	6	-	412	747
ENSDARG00000006823	ENSDART00000020068	8	2	2	GGCTCCTCCTCTCTGATGCTGTT	5	-	445	747
ENSDARG00000006823	ENSDART00000020068	8	3	3	TTCACCTTCAGATGTGGAGTGGCG	6	-	726	747
ENSDARG00000006823	ENSDART00000020068	8	3	3	CACCAAACCCGCAGGAAGCAGAG	5	-	624	747
ENSDARG00000006823	ENSDART00000020068	8	3	3	CACACCAAACCCGCAGGAAGCAGAG	7	-	624	747
ENSDARG00000006823	ENSDART00000020068	8	3	3	ACACCAAACCCGCAGGAAGCAGAG	6	-	624	747
ENSDARG00000006823	ENSDART00000093083	8	1	1	TCCTCCGGCCCCCAGGTGGCAGTG	6	-	223	1092
ENSDARG00000006823	ENSDART00000093083	8	1	1	CTCTGCAGAGTCCGCGTTGAGGGT	6	-	248	1092
ENSDARG00000006823	ENSDART00000093083	8	2	2	TGCTCCTGCAGGAGTTTGCTGAT	5	-	547	1092
ENSDARG00000006823	ENSDART00000093083	8	2	2	GGCTCCTCCTCTCTGATGCTGTT	5	-	493	1092
ENSDARG00000006823	ENSDART00000093083	8	2	2	GGCGTCTCCAGCCGAGGATTGGTGC	7	-	428	1092
ENSDARG00000006823	ENSDART00000093083	8	2	2	GGCGTCTCCAGCCGAGGATTGGTG	6	-	429	1092
ENSDARG00000006823	ENSDART00000093083	8	2	2	AGCGGCTCCTCCTCTCTGATGCT	5	-	496	1092
ENSDARG00000006823	ENSDART00000093083	8	2	2	CTCCTCCTCTCTGATGCTGTTGTC	6	-	490	1092
ENSDARG00000006823	ENSDART00000093083	8	2	2	ACACACCCAGCGCTGGCAGCAGTG	6	-	460	1092
ENSDARG00000006823	ENSDART00000093083	8	5	5	CACCAAACCCGCAGGAAGCAGAG	5	-	678	1092
ENSDARG00000006823	ENSDART00000093083	8	5	5	ACACCAAACCCGCAGGAAGCAGAG	6	-	678	1092
ENSDARG00000006823	ENSDART00000093083	8	5	5	CACACCAAACCCGCAGGAAGCAGAG	7	-	678	1092
ENSDARG00000006823	ENSDART00000093083	8	5	5	TTCACCTTCAGATGTGGAGTGGCG	6	-	780	1092
ENSDARG00000006823	ENSDART00000093083	8	6	6	AAACTCTTACTGCATCTGCAGGT	5	-	1009	1092
ENSDARG00000006823	ENSDART00000093083	8	6	6	GTCGTCCACACATGAGCCGCAGGA	6	-	892	1092
ENSDARG00000006823	ENSDART00000093083	8	6	6	AGCTCCGGCTTACGAGGTCTTGTTG	7	-	821	1092
ENSDARG00000006823	ENSDART00000098222	8	1	1	TCCTCCGGCCCCCAGGTGGCAGTG	6	-	175	1038
ENSDARG00000006823	ENSDART00000098222	8	1	1	CTCTGCAGAGTCCGCGTTGAGGGT	6	-	200	1038
ENSDARG00000006823	ENSDART00000098222	8	2	2	TGCTCCTGCAGGAGTTTGCTGAT	5	-	499	1038
ENSDARG00000006823	ENSDART00000098222	8	2	2	GGCTCCTCCTCTCTGATGCTGTT	5	-	445	1038
ENSDARG00000006823	ENSDART00000098222	8	2	2	GGCGTCTCCAGCCGAGGATTGGTGC	7	-	380	1038
ENSDARG00000006823	ENSDART00000098222	8	2	2	GGCGTCTCCAGCCGAGGATTGGTG	6	-	381	1038
ENSDARG00000006823	ENSDART00000098222	8	2	2	AGCGGCTCCTCCTCTCTGATGCT	5	-	448	1038
ENSDARG00000006823	ENSDART00000098222	8	2	2	CTCCTCCTCTCTGATGCTGTTGTC	6	-	442	1038
ENSDARG00000006823	ENSDART00000098222	8	2	2	ACACACCCAGCGCTGGCAGCAGTG	6	-	412	1038
ENSDARG00000006823	ENSDART00000098222	8	3	3	CACCAAACCCGCAGGAAGCAGAG	5	-	624	1038
ENSDARG00000006823	ENSDART00000098222	8	3	3	ACACCAAACCCGCAGGAAGCAGAG	6	-	624	1038
ENSDARG00000006823	ENSDART00000098222	8	3	3	CACACCAAACCCGCAGGAAGCAGAG	7	-	624	1038
ENSDARG00000006823	ENSDART00000098222	8	3	3	TTCACCTTCAGATGTGGAGTGGCG	6	-	726	1038
ENSDARG00000006823	ENSDART00000098222	8	4	4	AAACTCTTACTGCATCTGCAGGT	5	-	955	1038
ENSDARG00000006823	ENSDART00000098222	8	4	4	GTCGTCCACACATGAGCCGCAGGA	6	-	838	1038
ENSDARG00000006823	ENSDART00000098222	8	4	4	AGCTCCGGCTTACGAGGTCTTGTTG	7	-	767	1038
ENSDARG00000006823	ENSDART00000098226	8	2	2	TCCTCCGGCCCCCAGGTGGCAGTG	6	-	256	1149
ENSDARG00000006823	ENSDART00000098226	8	2	2	CTCTGCAGAGTCCGCGTTGAGGGT	6	-	281	1149
ENSDARG00000006823	ENSDART00000098226	8	3	3	TGCTCCTGCAGGAGTTTGCTGAT	5	-	580	1149
ENSDARG00000006823	ENSDART00000098226	8	3	3	GGCTCCTCCTCTCTGATGCTGTT	5	-	526	1149
ENSDARG00000006823	ENSDART00000098226	8	3	3	GGCGTCTCCAGCCGAGGATTGGTGC	7	-	461	1149
ENSDARG00000006823	ENSDART00000098226	8	3	3	GGCGTCTCCAGCCGAGGATTGGTG	6	-	462	1149
ENSDARG00000006823	ENSDART00000098226	8	3	3	CTCCTCCTCTCTGATGCTGTTGTC	6	-	523	1149
ENSDARG00000006823	ENSDART00000098226	8	3	3	ACACACCCAGCGCTGGCAGCAGTG	6	-	493	1149
ENSDARG00000006823	ENSDART00000098226	8	3	3	AGCGGCTCCTCCTCTCTGATGCT	5	-	529	1149
ENSDARG00000006823	ENSDART00000098226	8	5	5	TTCACCTTCAGATGTGGAGTGGCG	6	-	837	1149
ENSDARG00000006823	ENSDART00000098226	8	5	5	CACCAAACCCGCAGGAAGCAGAG	5	-	735	1149
ENSDARG00000006823	ENSDART00000098226	8	5	5	ACACCAAACCCGCAGGAAGCAGAG	6	-	735	1149
ENSDARG00000006823	ENSDART00000098226	8	5	5	CACACCAAACCCGCAGGAAGCAGAG	7	-	735	1149
ENSDARG00000006823	ENSDART00000098226	8	6	6	GTCGTCCACACATGAGCCGCAGGA	6	-	949	1149
ENSDARG00000006823	ENSDART00000098226	8	6	6	AGCTCCGGCTTACGAGGTCTTGTTG	7	-	878	1149
ENSDARG00000006823	ENSDART00000098226	8	6	6	AAACTCTTACTGCATCTGCAGGT	5	-	1066	1149
ENSDARG00000006900	ENSDART00000009178	8	5	5	GACAGCTTACCGGTGGGATTGGCT	6	+	332	1620
ENSDARG00000006900	ENSDART00000009178	8	6	6	ACCTGCCCCTCAGTGAGGTGGGT	5	+	602	1620
ENSDARG00000006900	ENSDART00000009178	8	8	8	GTTGGCACAGGCTGGTGTAGATGTG	7	+	873	1620
ENSDARG00000006900	ENSDART00000009178	8	8	8	GTAAACAGCTGCTTTGTGGTGCT	5	+	809	1620
ENSDARG00000006900	ENSDART00000009178	8	8	8	AACAGCTGCTTTGTGGTGCTGCC	5	+	812	1620
ENSDARG00000006900	ENSDART00000009178	8	10	10	AGAATCTTATTGATGCCGGTGCA	5	+	1019	1620
ENSDARG00000006900	ENSDART00000009178	8	13	13	AAAGGCTCCATCCATAAGTTTGT	5	+	1435	1620
ENSDARG00000006900	ENSDART00000099289	8	4	4	GACAGCTTACCGGTGGGATTGGCT	6	+	254	1557
ENSDARG00000006900	ENSDART00000099289	8	5	5	ACCTGCCCCTCAGTGAGGTGGGT	5	+	524	1557
ENSDARG00000006900	ENSDART00000099289	8	7	7	GTTGGCACAGGCTGGTGTAGATGTG	7	+	795	1557
ENSDARG00000006900	ENSDART00000099289	8	7	7	GTAAACAGCTGCTTTGTGGTGCT	5	+	731	1557
ENSDARG00000006900	ENSDART00000099289	8	7	7	AACAGCTGCTTTGTGGTGCTGCC	5	+	734	1557
ENSDARG00000006900	ENSDART00000099289	8	9	9	AGAATCTTATTGATGCCGGTGCA	5	+	941	1557
ENSDARG00000006900	ENSDART00000099289	8	12	12	AAAGGCTCCATCCATAAGTTTGT	5	+	1357	1557
ENSDARG00000006901	ENSDART00000025875	8	1	1	ATCACCTTCTCCATGTCTAGGTA	5	-	28	1179
ENSDARG00000006901	ENSDART00000025875	8	2	2	TGCCCAAACTGTAGAATCTGGTGAT	7	-	79	1179
ENSDARG00000006901	ENSDART00000025875	8	3	3	AAATACTGCATGAACATTAGAAGCA	7	-	230	1179
ENSDARG00000006901	ENSDART00000025875	8	3	3	GTTTCATCCACTAGGTGGCGAAC	5	-	286	1179
ENSDARG00000006901	ENSDART00000025875	8	5	5	GCCTCAGACTCTTTGGTTAGACGGC	7	-	647	1179
ENSDARG00000006901	ENSDART00000025875	8	5	5	GCACCAAGCACAAATGGATGGCTTT	7	-	575	1179
ENSDARG00000006901	ENSDART00000025875	8	5	5	CACCAAGCACAAATGGATGGCTTT	6	-	575	1179
ENSDARG00000006901	ENSDART00000025875	8	6	6	CTCTTCCTCATACTGTCGCTTAC	5	-	674	1179
ENSDARG00000006901	ENSDART00000025875	8	8	8	CTCAAAACAGTTAGTGTGAAGGT	5	-	866	1179
ENSDARG00000006901	ENSDART00000025875	8	8	8	AGCTCAAAACAGTTAGTGTGAAGGT	7	-	866	1179
ENSDARG00000006901	ENSDART00000025875	8	9	9	CTCCACAGACACAGTGGCATTGGTA	7	-	1038	1179
ENSDARG00000006901	ENSDART00000025875	8	9	9	TCCCTCCACAGACACAGTGGCATTG	7	-	1041	1179
ENSDARG00000006901	ENSDART00000025875	8	9	9	CCCTCCACAGACACAGTGGCATTG	6	-	1041	1179
ENSDARG00000006990	ENSDART00000020569	8	1	1	GTTTGCAGCTGGGGATGTGGTGTGT	7	+	23	960
ENSDARG00000006990	ENSDART00000020569	8	1	1	GTTTGCAGCTGGGGATGTGGTGTG	6	+	23	960
ENSDARG00000006990	ENSDART00000020569	8	1	1	GGCTGCTGCTCTTCTCTCTGTCTGT	7	+	50	960
ENSDARG00000006990	ENSDART00000020569	8	2	2	AGCCAATAAGAACTTCGGCGGTGGG	7	+	150	960
ENSDARG00000006990	ENSDART00000020569	8	6	6	GCACGCGTCTGGGCGACGGAGAC	5	+	485	960
ENSDARG00000006990	ENSDART00000020569	8	9	9	TACTGCTTCAACACAGACGGCTCT	6	+	751	960
ENSDARG00000007096	ENSDART00000010172	8	2	2	GTTGCCGACATTCTCTGTGAGTTT	6	+	52	633
ENSDARG00000007096	ENSDART00000010172	8	4	4	GCACCATCCAGTGGAGAGGTTTGT	6	+	282	633
ENSDARG00000007096	ENSDART00000010172	8	4	4	AGCACCATCCAGTGGAGAGGTTTGT	7	+	281	633
ENSDARG00000007096	ENSDART00000010172	8	5	5	AGACTCTGCTGTCTCATGTGGAGCA	7	+	347	633
ENSDARG00000007096	ENSDART00000010172	8	8	8	AGATGCAACTCTATGTTGAAGAA	5	+	602	633
ENSDARG00000007125	ENSDART00000014915	8	3	1	GTATCAGCCACTGGTGGACGCGGTG	7	+	48	1305
ENSDARG00000007125	ENSDART00000014915	8	3	1	ATCAGCCACTGGTGGACGCGGTG	5	+	50	1305
ENSDARG00000007125	ENSDART00000014915	8	5	3	AACAAACCAGACATGGTGCGAATGT	7	+	328	1305
ENSDARG00000007125	ENSDART00000014915	8	5	3	CAAACCAGACATGGTGCGAATGT	5	+	330	1305
ENSDARG00000007125	ENSDART00000014915	8	6	4	GAAAGCAGCCCTATTGACTTGGCC	6	+	397	1305
ENSDARG00000007125	ENSDART00000014915	8	8	6	GTCTTCTGCCCTGGCCGTTTGAGGA	7	+	1178	1305
ENSDARG00000007125	ENSDART00000014915	8	8	6	AGCCAAAGCCGAAGTGCTTTTGGA	6	+	981	1305
ENSDARG00000007125	ENSDART00000014915	8	8	6	GCCACCGACGGGGAAGTGTGGGAG	6	+	763	1305
ENSDARG00000007125	ENSDART00000014915	8	8	6	GCCAAAGCCGAAGTGCTTTTGGA	5	+	982	1305
ENSDARG00000007125	ENSDART00000014915	8	8	6	GAACGCGACCACACAAGACGGCGAG	7	+	597	1305
ENSDARG00000007125	ENSDART00000014915	8	8	6	CTCAACTGCCTGTGCTGGAGCAGGG	7	+	1052	1305
ENSDARG00000007125	ENSDART00000014915	8	8	6	AACCCATGCCGCTCAGGTGCCTTT	6	+	1133	1305
ENSDARG00000007172	ENSDART00000044000	8	1	1	CACCTCACCAGTTTTGCGGTGCA	5	-	50	5592
ENSDARG00000007172	ENSDART00000044000	8	1	1	GCCATCCCATCAGACTCTTTGGCT	6	-	369	5592
ENSDARG00000007172	ENSDART00000044000	8	1	1	GTTTACGGCTAGAGAGGGTTGGAA	6	-	494	5592
ENSDARG00000007172	ENSDART00000044000	8	1	1	ACCAGCAGCAATTTGTTGACGTT	5	-	220	5592
ENSDARG00000007172	ENSDART00000044000	8	1	1	GAACACCTCACCAGTTTTGCGGTG	6	-	52	5592
ENSDARG00000007172	ENSDART00000044000	8	1	1	CCCGTCACATCCACCTGAGTGAGCT	7	-	698	5592
ENSDARG00000007172	ENSDART00000044000	8	2	2	GAAATCATCACCAATCTGCTTGGGC	7	-	1095	5592
ENSDARG00000007172	ENSDART00000044000	8	2	2	GCCCACAAACACCACCGAATGGTCT	7	-	1230	5592
ENSDARG00000007172	ENSDART00000044000	8	2	2	ATCATCACCAATCTGCTTGGGCT	5	-	1094	5592
ENSDARG00000007172	ENSDART00000044000	8	3	3	TACAGCAAAGCGTTTTCTGACGGC	6	-	1302	5592
ENSDARG00000007172	ENSDART00000044000	8	4	4	AGACACGTCTTACAGCTGCTGTA	5	-	1453	5592
ENSDARG00000007172	ENSDART00000044000	8	6	6	GCCACCTTCACACTCAGCTGGAGCA	7	-	1637	5592
ENSDARG00000007172	ENSDART00000044000	8	7	7	GAACGCTGCAGTTGTAGAAGACGAA	7	-	1870	5592
ENSDARG00000007172	ENSDART00000044000	8	10	10	GTCACCGTCCCACACGATGGAGAA	6	-	2260	5592
ENSDARG00000007172	ENSDART00000044000	8	11	11	GTTTTCACCTTGGTAATGCGCGGAT	7	-	2489	5592
ENSDARG00000007172	ENSDART00000044000	8	11	11	GGCTGCAGCGAATGTTGCGTCGTC	6	-	2465	5592
ENSDARG00000007172	ENSDART00000044000	8	11	11	ACCAGCCACACTCAAATGTGCTGTC	7	-	2371	5592
ENSDARG00000007172	ENSDART00000044000	8	12	12	CTCCCCTTCAATGGTGACGCGTGT	6	-	2539	5592
ENSDARG00000007172	ENSDART00000044000	8	16	16	CTCCACTCCTCCATATTTGGCTCT	6	-	3142	5592
ENSDARG00000007172	ENSDART00000044000	8	18	18	AGATTCAGAGACTGTTAGCAGGC	5	-	3488	5592
ENSDARG00000007172	ENSDART00000044000	8	19	19	ACCTGCTCCGATCCCGATGATGGC	6	-	3631	5592
ENSDARG00000007172	ENSDART00000044000	8	19	19	ATCTGCAGCTGCAGGCGTTTGAG	5	-	3730	5592
ENSDARG00000007172	ENSDART00000044000	8	19	19	ATCTGCAGCTGCAGGCGTTTGAGTG	7	-	3728	5592
ENSDARG00000007172	ENSDART00000044000	8	19	19	TGCAGCTGCAGGCGTTTGAGTGT	5	-	3727	5592
ENSDARG00000007172	ENSDART00000044000	8	20	20	ACATCACTCTCATGGTGTAGGTA	5	-	3873	5592
ENSDARG00000007172	ENSDART00000044000	8	20	20	TTCGTCAGCTCTTGGATGTCTGT	5	-	3811	5592
ENSDARG00000007172	ENSDART00000044000	8	22	22	ACCGTCTAAGCAGTAGTTTAGGGT	6	-	4187	5592
ENSDARG00000007172	ENSDART00000044000	8	22	22	GCCTTCTCCACATTAGCTGGAGAC	6	-	3951	5592
ENSDARG00000007172	ENSDART00000044000	8	22	22	TGCGCCTCCAGCGTGTGGATGAA	5	-	4024	5592
ENSDARG00000007172	ENSDART00000044000	8	22	22	GCCTCCAGCGTGTGGATGAAGGT	5	-	4021	5592
ENSDARG00000007172	ENSDART00000044000	8	24	24	ACCAGCTGCTTGTAGTCGATTTG	5	-	4402	5592
ENSDARG00000007172	ENSDART00000044000	8	25	25	GGCTTCTCCTTCAGGAGGAATAC	5	-	4433	5592
ENSDARG00000007172	ENSDART00000044000	8	26	26	GACGTCTTCATCTTGGAGGATGAT	6	-	4609	5592
ENSDARG00000007172	ENSDART00000044000	8	26	26	GTCTTCATCTTGGAGGATGATTCT	6	-	4606	5592
ENSDARG00000007172	ENSDART00000044000	8	26	26	GTCTTCATCTTGGAGGATGATTC	5	-	4607	5592
ENSDARG00000007172	ENSDART00000044000	8	28	28	GACACCATCTTGCTGCCGCGGTC	5	-	4918	5592
ENSDARG00000007172	ENSDART00000044000	8	28	28	GTCTCCTTCCCGCTGGTCTGCATGC	7	-	4896	5592
ENSDARG00000007172	ENSDART00000044000	8	28	28	TCCTCAAGAGGCTCTCTGCAGCA	5	-	4776	5592
ENSDARG00000007172	ENSDART00000044000	8	29	29	GTCCACAAACTTCTGCAGAGTGC	5	-	4976	5592
ENSDARG00000007172	ENSDART00000044000	8	29	29	AAATCAAACATGTATTTGATGGC	5	-	5053	5592
ENSDARG00000007172	ENSDART00000044000	8	29	29	GAAATCAAACATGTATTTGATGGC	6	-	5053	5592
ENSDARG00000007172	ENSDART00000044000	8	30	30	TGCTCAGACGTGGAGCAGGAGTC	5	-	5257	5592
ENSDARG00000007172	ENSDART00000044000	8	30	30	CAAAACCGCAGAGGAAGGCTGGGAG	7	-	5138	5592
ENSDARG00000007172	ENSDART00000044000	8	30	30	AAAACCGCAGAGGAAGGCTGGGAG	6	-	5138	5592
ENSDARG00000007172	ENSDART00000044000	8	30	30	CTCCACCCAGCTCTTGTAGTTGGG	6	-	5332	5592
ENSDARG00000007172	ENSDART00000044000	8	30	30	GTTGACCCAAAACCGCAGAGGAA	5	-	5147	5592
ENSDARG00000007172	ENSDART00000044000	8	30	30	GACCCAAAACCGCAGAGGAAGGC	5	-	5144	5592
ENSDARG00000007172	ENSDART00000044000	8	30	30	GTCAAACACAAACTGAGGGTTTTTG	7	-	5175	5592
ENSDARG00000007172	ENSDART00000044000	8	30	30	GTCAAACACAAACTGAGGGTTTT	5	-	5177	5592
ENSDARG00000007275	ENSDART00000008778	8	1	1	AGACCAGCCAGAAGTGCTGAGGAA	6	-	36	1374
ENSDARG00000007275	ENSDART00000008778	8	1	1	AGACCAGCCAGAAGTGCTGAGGA	5	-	37	1374
ENSDARG00000007275	ENSDART00000008778	8	4	4	GCCTCACGCTGGGCTGTAAGAGTAA	7	-	308	1374
ENSDARG00000007275	ENSDART00000008778	8	4	4	CACAACTGCCTCACGCTGGGCTGTA	7	-	315	1374
ENSDARG00000007275	ENSDART00000008778	8	4	4	CCCATCCACATCTCAGTGGAGAAC	6	-	435	1374
ENSDARG00000007275	ENSDART00000008778	8	6	6	GACAGCTGCTGGTTGTCTGAGTGC	6	-	717	1374
ENSDARG00000007275	ENSDART00000008778	8	6	6	GACAGCTGCTGGTTGTCTGAGTG	5	-	718	1374
ENSDARG00000007275	ENSDART00000008778	8	6	6	GAAAAAATCCACCAGATGGAGGT	5	-	649	1374
ENSDARG00000007275	ENSDART00000008778	8	7	7	AGATTCGCCAATGAAAGCATAGTTG	7	-	927	1374
ENSDARG00000007275	ENSDART00000008778	8	8	8	GTTAGCGACTTTGCGTGATTTGGCA	7	-	1257	1374
ENSDARG00000007275	ENSDART00000008778	8	9	9	TGCCACTTCGCCACCTCTGAAGCG	6	-	1330	1374
ENSDARG00000007275	ENSDART00000008778	8	9	9	GACATCACCGAACAGCAGGATTT	5	-	1291	1374
ENSDARG00000007323	ENSDART00000015193	8	1	1	TCCACCGCCAAACAATTTGCCGAA	6	-	19	672
ENSDARG00000007323	ENSDART00000015193	8	1	1	ACCGCCAAACAATTTGCCGAATAC	6	-	16	672
ENSDARG00000007323	ENSDART00000015193	8	1	1	CTCCACCGCCAAACAATTTGCCGAA	7	-	19	672
ENSDARG00000007323	ENSDART00000015193	8	3	3	GGCATCAGAAATCTCTTGTGCCAAC	7	-	423	672
ENSDARG00000007323	ENSDART00000015193	8	4	4	ACCGACAGCTGTCTTTTTGGGTAA	6	-	598	672
ENSDARG00000007323	ENSDART00000015193	8	4	4	ACCGACAGCTGTCTTTTTGGGTA	5	-	599	672
ENSDARG00000007323	ENSDART00000098485	8	1	1	TCCACCGCCAAACAATTTGCCGAA	6	-	19	666
ENSDARG00000007323	ENSDART00000098485	8	1	1	ACCGCCAAACAATTTGCCGAATAC	6	-	16	666
ENSDARG00000007323	ENSDART00000098485	8	1	1	CTCCACCGCCAAACAATTTGCCGAA	7	-	19	666
ENSDARG00000007323	ENSDART00000098485	8	3	3	GGCATCAGAAATCTCTTGTGCCAAC	7	-	423	666
ENSDARG00000007323	ENSDART00000098485	8	4	4	ACCGACAGCTGTCTTTTTGGGTAA	6	-	598	666
ENSDARG00000007323	ENSDART00000098485	8	4	4	ACCGACAGCTGTCTTTTTGGGTA	5	-	599	666
ENSDARG00000007329	ENSDART00000007090	8	2	2	TCCTCCATCCATGCCCGGAGCCGGT	7	+	54	1410
ENSDARG00000007329	ENSDART00000007090	8	3	3	AAAATCAGCTTGTCTGGACTGGTGC	7	+	202	1410
ENSDARG00000007329	ENSDART00000007090	8	4	4	CCCGGCAGCCACTGGATGAAGCA	5	+	370	1410
ENSDARG00000007329	ENSDART00000007090	8	4	4	GGCAGCCACTGGATGAAGCAGCC	5	+	373	1410
ENSDARG00000007329	ENSDART00000007090	8	8	8	TACTCCCCATGGGGCGGAGCTTGC	6	+	826	1410
ENSDARG00000007329	ENSDART00000007090	8	9	9	TTCTCATACTCGTGCTGGTGAGCC	6	+	1402	1410
ENSDARG00000007329	ENSDART00000007090	8	9	9	TCCCTCCGCATCCCTCTGCAGGA	5	+	1133	1410
ENSDARG00000007329	ENSDART00000007090	8	9	9	GGCGGCAGCAGTGCATGTGGAAGCG	7	+	1012	1410
ENSDARG00000007329	ENSDART00000007090	8	9	9	ATCTTCATCTTCCAGCGTTGGCGGC	7	+	993	1410
ENSDARG00000007329	ENSDART00000007090	8	9	9	ATCTTCATCTTCCAGCGTTGGCG	5	+	993	1410
ENSDARG00000007369	ENSDART00000051825	8	2	2	ATCTCAGGCGAGAGGTGTGCTGGA	6	-	183	1266
ENSDARG00000007369	ENSDART00000051825	8	6	6	AGAGGCTTCTTTATGTGAGGTTTCT	7	-	587	1266
ENSDARG00000007369	ENSDART00000051825	8	8	8	TGCTCACCCTCTGGTGTTGAGTCT	6	-	855	1266
ENSDARG00000007369	ENSDART00000051825	8	8	8	CTCTTCCTCTTCTTGCGTTTGCC	5	-	820	1266
ENSDARG00000007369	ENSDART00000051825	8	8	8	TGCTCACCCTCTGGTGTTGAGTC	5	-	856	1266
ENSDARG00000007369	ENSDART00000051825	8	9	9	TGCGCCTGCTCAGAGTGTGTGGCG	6	-	1017	1266
ENSDARG00000007369	ENSDART00000051825	8	9	9	GTTGGCAGCCCAGAGGAGGAGGAG	6	-	1119	1266
ENSDARG00000007369	ENSDART00000051825	8	9	9	GTTGGCAGCCCAGAGGAGGAGGA	5	-	1120	1266
ENSDARG00000007369	ENSDART00000051825	8	9	9	GGCAGCCCAGAGGAGGAGGAGGAT	6	-	1116	1266
ENSDARG00000007369	ENSDART00000051825	8	9	9	GGCAGCCCAGAGGAGGAGGAGGA	5	-	1117	1266
ENSDARG00000007369	ENSDART00000051825	8	9	9	AGCTGCAGAGGGCGTGGCCGGAGAG	7	-	969	1266
ENSDARG00000007444	ENSDART00000004288	8	1	1	AGCCAATGCAGCTTCTGCAGACTTT	7	+	98	2025
ENSDARG00000007444	ENSDART00000004288	8	2	2	AAATACAAACCTTCTGGAGGAATGT	7	+	226	2025
ENSDARG00000007444	ENSDART00000004288	8	3	3	GTTTTCGTCAGGGTTTGGTGTCGGG	7	+	263	2025
ENSDARG00000007444	ENSDART00000004288	8	7	7	AAAGACTTACAGCAGGCAGCAGCA	6	+	751	2025
ENSDARG00000007444	ENSDART00000004288	8	8	8	AACTCCTACATGGTGTCTGAGAA	5	+	826	2025
ENSDARG00000007444	ENSDART00000004288	8	8	8	AGAAGCTCCCCAGAGAGTTGGAG	5	+	845	2025
ENSDARG00000007444	ENSDART00000004288	8	8	8	AGAAGCTCCCCAGAGAGTTGGAGAA	7	+	845	2025
ENSDARG00000007444	ENSDART00000004288	8	8	8	ACCTACAGAAGGTGGCGTCTGAGCC	7	+	890	2025
ENSDARG00000007444	ENSDART00000004288	8	16	16	GTCAAATTCAGAGAGCGGCAGAA	5	+	1733	2025
ENSDARG00000007444	ENSDART00000004288	8	17	17	TGCAAACACAGCAGAGCAGGAGTC	6	+	1821	2025
ENSDARG00000007444	ENSDART00000004288	8	17	17	GCAAACACAGCAGAGCAGGAGTC	5	+	1822	2025
ENSDARG00000007444	ENSDART00000004288	8	18	18	TCCGTCAGCAGGTGAAGCAGGTGCG	7	+	1859	2025
ENSDARG00000007444	ENSDART00000004288	8	18	18	TTCTCCGTCAGCAGGTGAAGCAGGT	7	+	1856	2025
ENSDARG00000007560	ENSDART00000010393	8	2	2	TTCCAACCCGTGTGTGCGTATGT	5	+	151	1890
ENSDARG00000007560	ENSDART00000010393	8	5	5	GAAACCGCAGAGCGAGACGATGAT	6	+	493	1890
ENSDARG00000007560	ENSDART00000010393	8	5	5	AACCGCAGAGCGAGACGATGATGGA	7	+	495	1890
ENSDARG00000007560	ENSDART00000010393	8	5	5	AGAAACCGCAGAGCGAGACGATGAT	7	+	492	1890
ENSDARG00000007560	ENSDART00000010393	8	8	8	GAACGCACCCTCTAATGTGGCGCC	6	+	965	1890
ENSDARG00000007560	ENSDART00000010393	8	9	9	CTCTTCAGATATTGGGACGGTGCT	6	+	1107	1890
ENSDARG00000007560	ENSDART00000010393	8	11	11	TGCCGCTGCACCGCTGCAGTATGT	6	+	1289	1890
ENSDARG00000007560	ENSDART00000010393	8	15	15	CGCAAACTCTTTCCCGCTTTTGGT	6	+	1739	1890
ENSDARG00000007560	ENSDART00000010393	8	16	16	CAAACCTGCCGCAGGTGGAGCAGTA	7	+	1862	1890
ENSDARG00000007560	ENSDART00000010393	8	16	16	TCCTTCAAACCTGCCGCAGGTGGA	6	+	1857	1890
ENSDARG00000007560	ENSDART00000015985	8	2	2	TTCCAACCCGTGTGTGCGTATGT	5	+	148	1956
ENSDARG00000007560	ENSDART00000015985	8	6	6	AGAAACCGCAGAGCGAGACGATGAT	7	+	492	1956
ENSDARG00000007560	ENSDART00000015985	8	6	6	AACCGCAGAGCGAGACGATGATGGA	7	+	495	1956
ENSDARG00000007560	ENSDART00000015985	8	6	6	GAAACCGCAGAGCGAGACGATGAT	6	+	493	1956
ENSDARG00000007560	ENSDART00000015985	8	9	9	GAACGCACCCTCTAATGTGGCGCC	6	+	965	1956
ENSDARG00000007560	ENSDART00000015985	8	10	10	CTCTTCAGATATTGGGACGGTGCT	6	+	1107	1956
ENSDARG00000007560	ENSDART00000015985	8	12	12	TGCCGCTGCACCGCTGCAGTATGT	6	+	1289	1956
ENSDARG00000007560	ENSDART00000015985	8	14	14	CGCAAACTCTTTCCCGCTTTTGGT	6	+	1718	1956
ENSDARG00000007560	ENSDART00000015985	8	14	14	TCCTTCAAACCTGCCGCAGGTGGA	6	+	1887	1956
ENSDARG00000007560	ENSDART00000015985	8	14	14	CAAACCTGCCGCAGGTGGAGCAGTA	7	+	1892	1956
ENSDARG00000007560	ENSDART00000046863	8	4	4	TTCCAACCCGTGTGTGCGTATGT	5	+	406	2286
ENSDARG00000007560	ENSDART00000046863	8	8	8	GAAACCGCAGAGCGAGACGATGAT	6	+	754	2286
ENSDARG00000007560	ENSDART00000046863	8	8	8	AGAAACCGCAGAGCGAGACGATGAT	7	+	753	2286
ENSDARG00000007560	ENSDART00000046863	8	8	8	AACCGCAGAGCGAGACGATGATGGA	7	+	756	2286
ENSDARG00000007560	ENSDART00000046863	8	11	11	GAACGCACCCTCTAATGTGGCGCC	6	+	1226	2286
ENSDARG00000007560	ENSDART00000046863	8	12	12	CTCTTCAGATATTGGGACGGTGCT	6	+	1368	2286
ENSDARG00000007560	ENSDART00000046863	8	14	14	TGCCGCTGCACCGCTGCAGTATGT	6	+	1550	2286
ENSDARG00000007560	ENSDART00000046863	8	16	16	TCCTTCAAACCTGCCGCAGGTGGA	6	+	2148	2286
ENSDARG00000007560	ENSDART00000046863	8	16	16	CGCAAACTCTTTCCCGCTTTTGGT	6	+	1979	2286
ENSDARG00000007560	ENSDART00000046863	8	16	16	CAAACCTGCCGCAGGTGGAGCAGTA	7	+	2153	2286
ENSDARG00000007923	ENSDART00000062693	8	2	2	ACACGCGGCAATGGAAGCCGAGTTT	7	+	84	1383
ENSDARG00000007923	ENSDART00000062693	8	4	4	GTTGACCACAGCCGTATTTGTCTAC	7	+	241	1383
ENSDARG00000007923	ENSDART00000062693	8	5	5	AACAGCGCAGTCGAGGAGTTGTAA	6	+	389	1383
ENSDARG00000007923	ENSDART00000062693	8	5	5	AACAGCGCAGTCGAGGAGTTGTA	5	+	389	1383
ENSDARG00000007923	ENSDART00000062693	8	6	6	GGCCTCAGCGAGAGGAGCGGGAGGC	7	+	461	1383
ENSDARG00000007923	ENSDART00000062693	8	7	7	CTACACCACATGGCCAGATTTTGGC	7	+	612	1383
ENSDARG00000007923	ENSDART00000062693	8	7	7	GACACCTGCCTTCTATTGGTGAGAT	7	+	772	1383
ENSDARG00000007923	ENSDART00000062693	8	7	7	TACACCACATGGCCAGATTTTGGC	6	+	613	1383
ENSDARG00000007923	ENSDART00000062693	8	8	8	AAATGCGACGATACCGCATGGGTC	6	+	842	1383
ENSDARG00000007923	ENSDART00000062693	8	10	10	GTCCCAGCAGAATTCGGAGCATTG	6	+	1171	1383
ENSDARG00000008148	ENSDART00000028009	8	1	1	GAAGGCGGCGGGTCGAGGAGCAGGG	7	+	108	1083
ENSDARG00000008148	ENSDART00000028009	8	1	1	AGCAGCAGAGTGAAGCTAATGAGGT	7	+	218	1083
ENSDARG00000008148	ENSDART00000028009	8	4	4	GACGGCGTCACCAAAGACGAAGAC	6	+	495	1083
ENSDARG00000008148	ENSDART00000028009	8	4	4	AAAGACTTCCAGCAGGAGGGTGAG	6	+	583	1083
ENSDARG00000008148	ENSDART00000028009	8	6	6	AGCAACAGCGCCGGGCAGGAGGT	5	+	727	1083
ENSDARG00000008148	ENSDART00000028009	8	6	6	AACAGCGCCGGGCAGGAGGTCAAC	6	+	730	1083
ENSDARG00000008148	ENSDART00000028009	8	8	8	TTCAACTTCCAGGATGTGAGAAC	5	+	781	1083
ENSDARG00000008148	ENSDART00000028009	8	10	10	TGCTCAACATTAAAGAGGAGTTGTC	7	+	983	1083
ENSDARG00000008148	ENSDART00000028009	8	10	10	TTCTGCTGCAGGTGGAGGAGCTGCT	7	+	962	1083
ENSDARG00000008148	ENSDART00000028009	8	10	10	TGCTCAACATTAAAGAGGAGTTG	5	+	983	1083
ENSDARG00000008148	ENSDART00000028009	8	10	10	AAATTCTGCTGCAGGTGGAGGAGCT	7	+	959	1083
ENSDARG00000008148	ENSDART00000028009	8	10	10	AAATTCTGCTGCAGGTGGAGGAG	5	+	959	1083
ENSDARG00000008148	ENSDART00000028009	8	11	11	ACACACAGCTCTGGAGCAGGAGAG	6	+	1026	1083
ENSDARG00000008148	ENSDART00000028009	8	11	11	TTACACACAGCTCTGGAGCAGGA	5	+	1024	1083
ENSDARG00000008148	ENSDART00000074825	8	1	1	GAAGGCGGCGGGTCGAGGAGCAGGG	7	+	108	1065
ENSDARG00000008148	ENSDART00000074825	8	1	1	AGCAGCAGAGTGAAGCTAATGAGGT	7	+	218	1065
ENSDARG00000008148	ENSDART00000074825	8	4	4	AAAGACTTCCAGCAGGAGGGTGAG	6	+	583	1065
ENSDARG00000008148	ENSDART00000074825	8	4	4	GACGGCGTCACCAAAGACGAAGAC	6	+	495	1065
ENSDARG00000008148	ENSDART00000074825	8	6	6	AACAGCGCCGGGCAGGAGGTCAAC	6	+	730	1065
ENSDARG00000008148	ENSDART00000074825	8	6	6	AGCAACAGCGCCGGGCAGGAGGT	5	+	727	1065
ENSDARG00000008148	ENSDART00000074825	8	9	9	AAATTCTGCTGCAGGTGGAGGAGCT	7	+	941	1065
ENSDARG00000008148	ENSDART00000074825	8	9	9	TTCTGCTGCAGGTGGAGGAGCTGCT	7	+	944	1065
ENSDARG00000008148	ENSDART00000074825	8	9	9	TGCTCAACATTAAAGAGGAGTTGTC	7	+	965	1065
ENSDARG00000008148	ENSDART00000074825	8	9	9	TGCTCAACATTAAAGAGGAGTTG	5	+	965	1065
ENSDARG00000008148	ENSDART00000074825	8	9	9	AAATTCTGCTGCAGGTGGAGGAG	5	+	941	1065
ENSDARG00000008148	ENSDART00000074825	8	10	10	TTACACACAGCTCTGGAGCAGGA	5	+	1006	1065
ENSDARG00000008148	ENSDART00000074825	8	10	10	ACACACAGCTCTGGAGCAGGAGAG	6	+	1008	1065
ENSDARG00000008329	ENSDART00000004588	8	1	1	AAAAACACCACCCAGAGGCAGCA	5	-	151	1503
ENSDARG00000008329	ENSDART00000004588	8	1	1	AAACACCACCCAGAGGCAGCATTT	6	-	148	1503
ENSDARG00000008329	ENSDART00000004588	8	1	1	AACACCACCCAGAGGCAGCATTT	5	-	148	1503
ENSDARG00000008329	ENSDART00000004588	8	1	1	AGAAAAGTCAAAGAGCTGAGGAA	5	-	172	1503
ENSDARG00000008329	ENSDART00000004588	8	1	1	GAAAAACACCACCCAGAGGCAGCA	6	-	151	1503
ENSDARG00000008329	ENSDART00000004588	8	1	1	GCCAGCAGCTCTCCTGCATGGTAC	6	-	348	1503
ENSDARG00000008329	ENSDART00000004588	8	5	5	TACAGCTCCCCCATGGCGCAGGC	5	-	870	1503
ENSDARG00000008433	ENSDART00000002164	8	3	3	AAATCATACCTTTTGTAGCATCT	5	-	216	2802
ENSDARG00000008433	ENSDART00000002164	8	4	4	TGCATCCACATCAATAGCTGGATAC	7	-	222	2802
ENSDARG00000008433	ENSDART00000002164	8	4	4	GCATCCACATCAATAGCTGGATAC	6	-	222	2802
ENSDARG00000008433	ENSDART00000002164	8	7	7	GGCCTCTTCTTTGCCGTAGTTTCT	6	-	796	2802
ENSDARG00000008433	ENSDART00000002164	8	9	9	GTCATCACAGATATCTCTGAATTG	6	-	1141	2802
ENSDARG00000008433	ENSDART00000002164	8	10	10	AGAGACTCCGTTGCTGATGAAGAA	6	-	1390	2802
ENSDARG00000008433	ENSDART00000002164	8	12	12	CACATCAGCATCATTGGTGAGGT	5	-	1631	2802
ENSDARG00000008433	ENSDART00000002164	8	12	12	CACATCAGCATCATTGGTGAGGTA	6	-	1630	2802
ENSDARG00000008433	ENSDART00000002164	8	13	13	GGCGACCGCATACAGGATGGTCT	5	-	1721	2802
ENSDARG00000008433	ENSDART00000002164	8	16	16	TTAGCCAGAGCATGGCTGGCTTT	5	-	2092	2802
ENSDARG00000008433	ENSDART00000002164	8	17	17	ACACTCACCGAAGTTTGTCGTTTAA	7	-	2260	2802
ENSDARG00000008433	ENSDART00000002164	8	19	19	GGCTGCTGCCCTCTGAAGCTTCT	5	-	2468	2802
ENSDARG00000008433	ENSDART00000002164	8	19	19	GCCGTCTTCCAGATATCTGTCTTG	6	-	2398	2802
ENSDARG00000008433	ENSDART00000002164	8	19	19	CCCGGCTGCTGCCCTCTGAAGCT	5	-	2471	2802
ENSDARG00000008433	ENSDART00000002164	8	19	19	ATCGCCAGAGCCCCGGCTGCTGCC	6	-	2481	2802
ENSDARG00000008433	ENSDART00000002164	8	20	20	ACCGTCACAAGACCTCTGTGTTG	5	-	2608	2802
ENSDARG00000008433	ENSDART00000002164	8	20	20	ACCGTCACAAGACCTCTGTGTTGAA	7	-	2606	2802
ENSDARG00000008461	ENSDART00000026592	8	7	7	GCCTCATTCTCTCTGGTGCAGAG	5	+	863	2283
ENSDARG00000008461	ENSDART00000026592	8	7	7	GACCGCCTCATTCTCTCTGGTGCA	6	+	859	2283
ENSDARG00000008461	ENSDART00000026592	8	8	8	GCAGTCATCAGGCTGATTTGGCTCT	7	+	971	2283
ENSDARG00000008461	ENSDART00000026592	8	8	8	GCAGTCATCAGGCTGATTTGGCT	5	+	971	2283
ENSDARG00000008461	ENSDART00000026592	8	8	8	GTCTTCAACATTGTCTGGTAGGAA	6	+	1040	2283
ENSDARG00000008461	ENSDART00000026592	8	10	10	CAAACCACATCCATATGGAGGATGT	7	+	1297	2283
ENSDARG00000008461	ENSDART00000026592	8	10	10	AACCACATCCATATGGAGGATGTA	6	+	1299	2283
ENSDARG00000008461	ENSDART00000026592	8	10	10	AACCACATCCATATGGAGGATGT	5	+	1299	2283
ENSDARG00000008461	ENSDART00000026592	8	11	11	GAACAACACTGAGGCCTTTGCTGTT	7	+	1407	2283
ENSDARG00000008461	ENSDART00000026592	8	14	14	TTCTCCAGCAGCTTCAGCAGCAGTG	7	+	1715	2283
ENSDARG00000008461	ENSDART00000026592	8	16	16	AAAGGCAGAGCTCTTCTGCTGGC	5	+	2005	2283
ENSDARG00000008461	ENSDART00000026592	8	17	17	TCCGCCTGCTGGATCAGGAGCTGCC	7	+	2237	2283
ENSDARG00000008461	ENSDART00000026592	8	17	17	TCCTGCAGCTGTGGAATTAGCCGTG	7	+	2076	2283
ENSDARG00000008472	ENSDART00000021514	8	2	2	GTAGCCATCGACAATCGCTGTTTTC	7	-	141	1674
ENSDARG00000008472	ENSDART00000021514	8	3	3	TTCCTCGGCCAGAAATGGAGTAGCG	7	-	234	1674
ENSDARG00000008472	ENSDART00000021514	8	3	3	AACCTCTCCCTGATTGGATAGTAG	6	-	271	1674
ENSDARG00000008472	ENSDART00000021514	8	3	3	AAACTCACATGAAGTGATGCTGGG	6	-	374	1674
ENSDARG00000008472	ENSDART00000021514	8	6	6	TTCACCAGAGAGTGGTTGGAGAA	5	-	847	1674
ENSDARG00000008472	ENSDART00000021514	8	6	6	TCCTCAGCAGGTTCATCTGCAGCA	6	-	684	1674
ENSDARG00000008472	ENSDART00000021514	8	6	6	GTCTTCACCAGAGAGTGGTTGGAG	6	-	849	1674
ENSDARG00000008472	ENSDART00000021514	8	6	6	GTCTTCACCAGAGAGTGGTTGGA	5	-	850	1674
ENSDARG00000008472	ENSDART00000021514	8	6	6	ATCCTCAGCAGGTTCATCTGCAGCA	7	-	684	1674
ENSDARG00000008472	ENSDART00000021514	8	6	6	ACACAAGGCTCGTTGTGTGATTT	5	-	1534	1674
ENSDARG00000008472	ENSDART00000021514	8	6	6	AACGTCTTCACCAGAGAGTGGTTG	6	-	852	1674
ENSDARG00000008703	ENSDART00000023349	8	4	4	GAAAACACCATTAAAGGAGAGGAA	6	+	328	2190
ENSDARG00000008703	ENSDART00000023349	8	4	4	AGAAAACACCATTAAAGGAGAGGAA	7	+	327	2190
ENSDARG00000008703	ENSDART00000023349	8	5	5	CACGGCAAAGTCTATGAAGACGGT	6	+	421	2190
ENSDARG00000008703	ENSDART00000023349	8	6	6	CTCCTCTACATCGCGGAGAAGAA	5	+	484	2190
ENSDARG00000008703	ENSDART00000023349	8	8	8	AGCAACATCTCTGTGCTGGAGGG	5	+	697	2190
ENSDARG00000008703	ENSDART00000023349	8	8	8	GGCAGCAACATCTCTGTGCTGGA	5	+	694	2190
ENSDARG00000008703	ENSDART00000023349	8	9	9	TACTGCGCCAACAGAAGGTGAATTT	7	+	823	2190
ENSDARG00000008703	ENSDART00000023349	8	9	9	AAATACTGCGCCAACAGAAGGTGAA	7	+	820	2190
ENSDARG00000008703	ENSDART00000023349	8	9	9	CTCGGCCTCAAATACTGCGCCAAC	6	+	811	2190
ENSDARG00000008703	ENSDART00000023349	8	11	11	CACATCTACAGTGCAGCCGACTCT	6	+	974	2190
ENSDARG00000008703	ENSDART00000023349	8	11	11	GTCCACATCTACAGTGCAGCCGAC	6	+	971	2190
ENSDARG00000008703	ENSDART00000023349	8	12	12	CACCAAACAGACCAGCGTTGTGGTT	7	+	1014	2190
ENSDARG00000008703	ENSDART00000023349	8	13	13	TTCTGCAGCGCTCAGAGGAGCCGGA	7	+	1135	2190
ENSDARG00000008703	ENSDART00000023349	8	16	16	AGCGACATCAGCTGGCAGACGCT	5	+	1378	2190
ENSDARG00000008703	ENSDART00000023349	8	17	17	TTCATCAGCGGGTTTGGACTTTGAT	7	+	1434	2190
ENSDARG00000008703	ENSDART00000023349	8	18	18	GCCTCACTCAGTGCTGGTGTCGGA	6	+	1530	2190
ENSDARG00000008703	ENSDART00000023349	8	21	21	GAACCCGCAATTCTGGAGCAGAT	5	+	1933	2190
ENSDARG00000008703	ENSDART00000023349	8	22	22	GAAGACTCCAGTGCTTCTGATGCT	6	+	1992	2190
ENSDARG00000008703	ENSDART00000098029	8	3	3	GAAAACACCATTAAAGGAGAGGAA	6	+	304	2145
ENSDARG00000008703	ENSDART00000098029	8	3	3	AGAAAACACCATTAAAGGAGAGGAA	7	+	303	2145
ENSDARG00000008703	ENSDART00000098029	8	4	4	CACGGCAAAGTCTATGAAGACGGT	6	+	397	2145
ENSDARG00000008703	ENSDART00000098029	8	5	5	CTCCTCTACATCGCGGAGAAGAA	5	+	460	2145
ENSDARG00000008703	ENSDART00000098029	8	7	7	AGCAACATCTCTGTGCTGGAGGG	5	+	637	2145
ENSDARG00000008703	ENSDART00000098029	8	7	7	GGCAGCAACATCTCTGTGCTGGA	5	+	634	2145
ENSDARG00000008703	ENSDART00000098029	8	10	10	TACTGCGCCAACAGAAGGTGAATTT	7	+	763	2145
ENSDARG00000008703	ENSDART00000098029	8	10	10	CTCGGCCTCAAATACTGCGCCAAC	6	+	751	2145
ENSDARG00000008703	ENSDART00000098029	8	10	10	AAATACTGCGCCAACAGAAGGTGAA	7	+	760	2145
ENSDARG00000008703	ENSDART00000098029	8	14	14	CACCAAACAGACCAGCGTTGTGGTT	7	+	954	2145
ENSDARG00000008703	ENSDART00000098029	8	15	15	TTCTGCAGCGCTCAGAGGAGCCGGA	7	+	1075	2145
ENSDARG00000008703	ENSDART00000098029	8	18	18	AGCGACATCAGCTGGCAGACGCT	5	+	1333	2145
ENSDARG00000008703	ENSDART00000098029	8	19	19	TTCATCAGCGGGTTTGGACTTTGAT	7	+	1389	2145
ENSDARG00000008703	ENSDART00000098029	8	20	20	GCCTCACTCAGTGCTGGTGTCGGA	6	+	1488	2145
ENSDARG00000008703	ENSDART00000098029	8	24	24	GAACCCGCAATTCTGGAGCAGAT	5	+	1888	2145
ENSDARG00000008703	ENSDART00000098029	8	25	25	GAAGACTCCAGTGCTTCTGATGCT	6	+	1947	2145
ENSDARG00000008703	ENSDART00000098031	8	4	4	GAAAACACCATTAAAGGAGAGGAA	6	+	328	2196
ENSDARG00000008703	ENSDART00000098031	8	4	4	AGAAAACACCATTAAAGGAGAGGAA	7	+	327	2196
ENSDARG00000008703	ENSDART00000098031	8	5	5	CACGGCAAAGTCTATGAAGACGGT	6	+	421	2196
ENSDARG00000008703	ENSDART00000098031	8	6	6	CTCCTCTACATCGCGGAGAAGAA	5	+	484	2196
ENSDARG00000008703	ENSDART00000098031	8	8	8	GGCAGCAACATCTCTGTGCTGGA	5	+	694	2196
ENSDARG00000008703	ENSDART00000098031	8	8	8	AGCAACATCTCTGTGCTGGAGGG	5	+	697	2196
ENSDARG00000008703	ENSDART00000098031	8	11	11	CTCGGCCTCAAATACTGCGCCAAC	6	+	811	2196
ENSDARG00000008703	ENSDART00000098031	8	11	11	AAATACTGCGCCAACAGAAGGTGAA	7	+	820	2196
ENSDARG00000008703	ENSDART00000098031	8	11	11	TACTGCGCCAACAGAAGGTGAATTT	7	+	823	2196
ENSDARG00000008703	ENSDART00000098031	8	15	15	CACCAAACAGACCAGCGTTGTGGTT	7	+	1014	2196
ENSDARG00000008703	ENSDART00000098031	8	16	16	TTCTGCAGCGCTCAGAGGAGCCGGA	7	+	1135	2196
ENSDARG00000008703	ENSDART00000098031	8	19	19	AGCGACATCAGCTGGCAGACGCT	5	+	1378	2196
ENSDARG00000008703	ENSDART00000098031	8	20	20	TTCATCAGCGGGTTTGGACTTTGAT	7	+	1434	2196
ENSDARG00000008703	ENSDART00000098031	8	21	21	GCCTCACTCAGTGCTGGTGTCGGA	6	+	1533	2196
ENSDARG00000008703	ENSDART00000098031	8	24	24	GAACCCGCAATTCTGGAGCAGAT	5	+	1936	2196
ENSDARG00000008703	ENSDART00000098031	8	25	25	GAAGACTCCAGTGCTTCTGATGCT	6	+	1995	2196
ENSDARG00000008866	ENSDART00000017495	8	4	4	GCAGTCTGCCACATCTTTGTAGTG	6	-	130	495
ENSDARG00000008866	ENSDART00000017495	8	6	6	TCCATCTCCGTTGAGGTCGATGTC	6	-	442	495
ENSDARG00000008931	ENSDART00000046640	8	4	4	ACCTGCATCACTTTGTCTTGTGT	5	-	421	1209
ENSDARG00000008931	ENSDART00000046640	8	7	7	AGAAAAGGCCACCATGCTGTTTGT	6	-	866	1209
ENSDARG00000008931	ENSDART00000046640	8	7	7	CTCCACTGCAGTTTTCTGCAGCT	5	-	809	1209
ENSDARG00000008931	ENSDART00000046640	8	7	7	GTCCCATCCAGCGAAGAATGGAAC	6	-	844	1209
ENSDARG00000008979	ENSDART00000019858	8	2	1	AGCTTCTTCTTCAACTTTGCAAAC	6	-	12	1023
ENSDARG00000008979	ENSDART00000019858	8	3	2	AGAAAAGTCATCTCTGGAGCTGCT	6	-	148	1023
ENSDARG00000008979	ENSDART00000019858	8	3	2	AAAGTCATCTCTGGAGCTGCTGCC	6	-	145	1023
ENSDARG00000008979	ENSDART00000019858	8	4	3	GTCTTCTGCATTAGCCGAAGCTGCT	7	-	236	1023
ENSDARG00000008979	ENSDART00000019858	8	5	4	TCCATCCACTCCTGGTCTTTTTT	5	-	388	1023
ENSDARG00000008979	ENSDART00000019858	8	8	7	AACTTCAGCACCACGTGTTTGAGGT	7	-	824	1023
ENSDARG00000008979	ENSDART00000019858	8	8	7	AACTTCAGCACCACGTGTTTGAG	5	-	826	1023
ENSDARG00000008979	ENSDART00000019858	8	8	7	TTCAGCACCACGTGTTTGAGGTA	5	-	823	1023
ENSDARG00000008979	ENSDART00000098578	8	1	1	AGCTTCTTCTTCAACTTTGCAAAC	6	-	12	2586
ENSDARG00000008979	ENSDART00000098578	8	2	2	AGAAAAGTCATCTCTGGAGCTGCT	6	-	148	2586
ENSDARG00000008979	ENSDART00000098578	8	2	2	AAAGTCATCTCTGGAGCTGCTGCC	6	-	145	2586
ENSDARG00000008979	ENSDART00000098578	8	3	3	GTCTTCTGCATTAGCCGAAGCTGCT	7	-	236	2586
ENSDARG00000008979	ENSDART00000098578	8	4	4	TCCATCCACTCCTGGTCTTTTTT	5	-	388	2586
ENSDARG00000008979	ENSDART00000098578	8	7	7	GACACCTGCTGGATCAGCTGCTGCA	7	-	803	2586
ENSDARG00000008979	ENSDART00000098578	8	8	8	TGCTTCTGCATTGCTTTGTGCCTAA	7	-	840	2586
ENSDARG00000008979	ENSDART00000098578	8	13	13	GTTGGCCTCCGTTTCTCTGTCTCT	6	-	1465	2586
ENSDARG00000008979	ENSDART00000098578	8	13	13	CTCTTCCTCCAGTCTGGCTGTTTTC	7	-	1425	2586
ENSDARG00000008979	ENSDART00000098578	8	14	14	CTCCTCAAAAGGGAGTTTTTTTC	5	-	1522	2586
ENSDARG00000008979	ENSDART00000098578	8	14	14	CTAGACTGCTCCAGTTCTGCCGTC	6	-	1578	2586
ENSDARG00000008979	ENSDART00000098578	8	17	17	GACGTCAGCTGAGAGTTGTGTTC	5	-	1879	2586
ENSDARG00000008979	ENSDART00000098578	8	17	17	ACAGACTGCTACGGGCCGCCTGC	5	-	1800	2586
ENSDARG00000008979	ENSDART00000098578	8	18	18	CTCATCTGCATGTGAATGTGCTGTT	7	-	1989	2586
ENSDARG00000008979	ENSDART00000098578	8	18	18	CTCACCTTCACACTCATCTGCATGT	7	-	2001	2586
ENSDARG00000008979	ENSDART00000098578	8	19	19	ACACACACCAGTTCTTTCTGTAGTG	7	-	2156	2586
ENSDARG00000008979	ENSDART00000098578	8	20	20	AACTTCAGCACCACGTGTTTGAG	5	-	2389	2586
ENSDARG00000008979	ENSDART00000098578	8	20	20	AACTTCAGCACCACGTGTTTGAGGT	7	-	2387	2586
ENSDARG00000008979	ENSDART00000098578	8	20	20	TTCAGCACCACGTGTTTGAGGTA	5	-	2386	2586
ENSDARG00000009212	ENSDART00000025620	8	4	4	ACAGGCAGCCAGCGCCGGTGTGTTT	7	-	340	552
ENSDARG00000009390	ENSDART00000011258	8	2	1	AAACTCACAGGGCTCGTGGCAGCT	6	+	28	921
ENSDARG00000009390	ENSDART00000011258	8	6	5	AAACCCATCAATGCAGGTTTTTAA	6	+	358	921
ENSDARG00000009390	ENSDART00000011258	8	6	5	AAACCCATCAATGCAGGTTTTTAAC	7	+	358	921
ENSDARG00000009390	ENSDART00000011258	8	6	5	GCATGCAGCCAGTATAGGGGCTGAT	7	+	303	921
ENSDARG00000009390	ENSDART00000011258	8	6	5	TTAAACCCATCAATGCAGGTTTT	5	+	356	921
ENSDARG00000009470	ENSDART00000018862	8	1	1	TGCGGCCTCTTCAGGCGGCAGTT	5	-	248	1692
ENSDARG00000009470	ENSDART00000018862	8	1	1	GGCCTCTTCAGGCGGCAGTTTCT	5	-	245	1692
ENSDARG00000009470	ENSDART00000018862	8	2	2	TGCTGCGACAGATGCGATTGGTTG	6	-	393	1692
ENSDARG00000009470	ENSDART00000018862	8	2	2	TGCGACAGATGCGATTGGTTGAGAC	7	-	389	1692
ENSDARG00000009470	ENSDART00000018862	8	2	2	CTCCACTACCTCTCTCTGGGGAA	5	-	359	1692
ENSDARG00000009470	ENSDART00000018862	8	2	2	CACTACCTCTCTCTGGGGAAGGT	5	-	356	1692
ENSDARG00000009470	ENSDART00000018862	8	3	3	CTCCTCGACTGGCATTTGTGAATTC	7	-	502	1692
ENSDARG00000009470	ENSDART00000018862	8	4	4	TGCCTCCTCTTTACGCCGATTTG	5	-	776	1692
ENSDARG00000009470	ENSDART00000018862	8	5	5	CTCTCACACACCACCGTCTGACTGT	7	-	905	1692
ENSDARG00000009470	ENSDART00000018862	8	6	6	AGAGCCTCCTACAGATGCCTGAGAG	7	-	1038	1692
ENSDARG00000009470	ENSDART00000018862	8	9	9	ACCTGCTTCAGGTGAAGTGGACTGC	7	-	1548	1692
ENSDARG00000009470	ENSDART00000074166	8	1	1	TGCGGCCTCTTCAGGCGGCAGTT	5	-	248	1377
ENSDARG00000009470	ENSDART00000074166	8	1	1	GGCCTCTTCAGGCGGCAGTTTCT	5	-	245	1377
ENSDARG00000009470	ENSDART00000074166	8	2	2	CTCCACTACCTCTCTCTGGGGAA	5	-	359	1377
ENSDARG00000009470	ENSDART00000074166	8	2	2	TGCTGCGACAGATGCGATTGGTTG	6	-	393	1377
ENSDARG00000009470	ENSDART00000074166	8	2	2	TGCGACAGATGCGATTGGTTGAGAC	7	-	389	1377
ENSDARG00000009470	ENSDART00000074166	8	2	2	CACTACCTCTCTCTGGGGAAGGT	5	-	356	1377
ENSDARG00000009470	ENSDART00000074166	8	3	3	CTCCTCGACTGGCATTTGTGAATTC	7	-	502	1377
ENSDARG00000009470	ENSDART00000074166	8	4	4	TGCCTCCTCTTTACGCCGATTTG	5	-	776	1377
ENSDARG00000009470	ENSDART00000074166	8	5	5	CTCTCACACACCACCGTCTGACTGT	7	-	905	1377
ENSDARG00000009470	ENSDART00000074166	8	6	6	AGAGCCTCCTACAGATGCCTGAGAG	7	-	1038	1377
ENSDARG00000009470	ENSDART00000098062	8	1	1	GGCCTCTTCAGGCGGCAGTTTCT	5	-	227	1590
ENSDARG00000009470	ENSDART00000098062	8	1	1	TGCGGCCTCTTCAGGCGGCAGTT	5	-	230	1590
ENSDARG00000009470	ENSDART00000098062	8	2	2	CACTACCTCTCTCTGGGGAAGGT	5	-	338	1590
ENSDARG00000009470	ENSDART00000098062	8	2	2	CTCCACTACCTCTCTCTGGGGAA	5	-	341	1590
ENSDARG00000009470	ENSDART00000098062	8	2	2	TGCGACAGATGCGATTGGTTGAGAC	7	-	371	1590
ENSDARG00000009470	ENSDART00000098062	8	2	2	TGCTGCGACAGATGCGATTGGTTG	6	-	375	1590
ENSDARG00000009470	ENSDART00000098062	8	4	4	GCACACATCCTAAATTTGCATTG	5	-	498	1590
ENSDARG00000009470	ENSDART00000098062	8	5	5	CAAAACACATTGGACATTAGCTGAG	7	-	528	1590
ENSDARG00000009470	ENSDART00000098062	8	6	6	CTCCTCGACTGGCATTTGTGAATTC	7	-	565	1590
ENSDARG00000009470	ENSDART00000098062	8	7	7	TGCCTCCTCTTTACGCCGATTTG	5	-	839	1590
ENSDARG00000009470	ENSDART00000098062	8	8	8	CTCTCACACACCACCGTCTGACTGT	7	-	1019	1590
ENSDARG00000009470	ENSDART00000098062	8	9	9	AGAGCCTCCTACAGATGCCTGAGAG	7	-	1152	1590
ENSDARG00000009473	ENSDART00000013214	8	2	2	GCACCATTCGTATGAAGTTGGAGTA	7	+	152	1161
ENSDARG00000009473	ENSDART00000013214	8	2	2	AACAAATGCCAGTACTGCCGCTTTC	7	+	220	1161
ENSDARG00000009473	ENSDART00000013214	8	4	4	CGCCAAAAACATACCTGGCTTTGTG	7	+	636	1161
ENSDARG00000009473	ENSDART00000013214	8	4	4	GCCAAAAACATACCTGGCTTTGTG	6	+	637	1161
ENSDARG00000009473	ENSDART00000013214	8	4	4	GCAGGCAGAAAACGGGCTGGTCT	5	+	510	1161
ENSDARG00000009473	ENSDART00000013214	8	5	5	GCAGCCATCATATTGTGTGGAGGTG	7	+	904	1161
ENSDARG00000009473	ENSDART00000013214	8	5	5	GCAGCCATCATATTGTGTGGAGGT	6	+	904	1161
ENSDARG00000009473	ENSDART00000013214	8	6	6	TTCCCAAGCTGCTGCAGAAGATGGC	7	+	1034	1161
ENSDARG00000009557	ENSDART00000010591	8	3	2	TACAAAAGAGGACTTGTGCAGGT	5	+	211	1338
ENSDARG00000009557	ENSDART00000010591	8	5	4	AAAGCCTGCCAGAAAGGTGAGTTG	6	+	406	1338
ENSDARG00000009557	ENSDART00000010591	8	6	5	GACTACATCAGTGTGTTTGTATGT	6	+	481	1338
ENSDARG00000009557	ENSDART00000010591	8	7	6	GTCTCCTAATGGCTGTGTGCTTGC	6	+	567	1338
ENSDARG00000009557	ENSDART00000010591	8	11	10	ATCGGCATCTCTGCTGTGGCTTTC	6	+	994	1338
ENSDARG00000009557	ENSDART00000010591	8	11	10	ATCGGCATCTCTGCTGTGGCTTT	5	+	994	1338
ENSDARG00000009557	ENSDART00000010591	8	11	10	AAAATCGGCATCTCTGCTGTGGCT	6	+	991	1338
ENSDARG00000009557	ENSDART00000010591	8	12	11	ACATGCCTCAGAGCCTGTGGGTGTG	7	+	1055	1338
ENSDARG00000009557	ENSDART00000010591	8	12	11	ACATGCCTCAGAGCCTGTGGGTGT	6	+	1055	1338
ENSDARG00000009557	ENSDART00000010591	8	12	11	ACATGCAGAAGTTCAGTCTGCTGGC	7	+	1082	1338
ENSDARG00000009557	ENSDART00000010591	8	12	11	ACAGACGGCTCCTGTGCGCTGCT	5	+	1116	1338
ENSDARG00000009557	ENSDART00000010591	8	12	11	TGCCTCAGAGCCTGTGGGTGTGGGA	7	+	1058	1338
ENSDARG00000009629	ENSDART00000019907	8	1	1	GACCACAAATCAGGGGGCGGCGTC	6	+	85	729
ENSDARG00000009629	ENSDART00000019907	8	1	1	AGAGACCACAAATCAGGGGGCGGCG	7	+	82	729
ENSDARG00000009629	ENSDART00000019907	8	1	1	AGAGACCACAAATCAGGGGGCGGC	6	+	82	729
ENSDARG00000009629	ENSDART00000019907	8	1	1	AGAGACATCACTCCGGATGAAGTT	6	+	184	729
ENSDARG00000009629	ENSDART00000019907	8	1	1	ACATCACTCCGGATGAAGTTTTG	5	+	188	729
ENSDARG00000009629	ENSDART00000019907	8	1	1	AACGGCTCCGATTCAGCGGCGGCG	6	+	55	729
ENSDARG00000009629	ENSDART00000019907	8	2	2	CAAACCACCACACTGTGGTATGT	5	+	330	729
ENSDARG00000009629	ENSDART00000019907	8	2	2	CTCCACAGACTATTTGTGTAAAC	5	+	225	729
ENSDARG00000009629	ENSDART00000019907	8	2	2	GCCAAACCACCACACTGTGGTATGT	7	+	328	729
ENSDARG00000009629	ENSDART00000019907	8	4	4	CAAGACCGCCTCCTGAAGAGTTT	5	+	520	729
ENSDARG00000009629	ENSDART00000019907	8	5	5	GACAGCTTCTACTTTGTGGATAAC	6	+	667	729
ENSDARG00000009629	ENSDART00000019907	8	5	5	GACAGCTTCTACTTTGTGGATAA	5	+	667	729
ENSDARG00000009681	ENSDART00000005140	8	2	2	GCAGTCCACTGTTGTGTAAGGGGTG	7	-	259	933
ENSDARG00000009681	ENSDART00000005140	8	3	3	GTTCCCATCTGATTGGCTGAGCG	5	-	412	933
ENSDARG00000009681	ENSDART00000005140	8	7	7	GTACCCACCATGAAGGAGCGAAC	5	-	796	933
ENSDARG00000009681	ENSDART00000005140	8	7	7	CACAACATCAGGCATCTGCGGTA	5	-	773	933
ENSDARG00000009681	ENSDART00000005140	8	7	7	ACATCAGGCATCTGCGGTAGCTGGT	7	-	767	933
ENSDARG00000009681	ENSDART00000005140	8	8	8	AGCTCCTTAACCAGGTCTGGTAA	5	-	804	933
ENSDARG00000009681	ENSDART00000005140	8	8	8	AGACCCTCCTGCAGGTATTTGCC	5	-	862	933
ENSDARG00000009695	ENSDART00000038725	8	6	6	ACCGACAGATAATTGCAGAGGTC	5	-	508	1596
ENSDARG00000009695	ENSDART00000038725	8	6	6	ACCGTCTGCTTCAATGTGTGGAT	5	-	548	1596
ENSDARG00000009695	ENSDART00000038725	8	6	6	ACCGTCTGCTTCAATGTGTGGATGT	7	-	546	1596
ENSDARG00000009695	ENSDART00000038725	8	6	6	GTCTGCTTCAATGTGTGGATGTG	5	-	545	1596
ENSDARG00000009695	ENSDART00000038725	8	8	8	CTCAAAGCAGTCCATATAATTTGAC	7	-	825	1596
ENSDARG00000009695	ENSDART00000038725	8	9	9	TTCAAAACAGTTAATGTGGTGAA	5	-	944	1596
ENSDARG00000009695	ENSDART00000038725	8	9	9	GAAGGCAGATGTTCTGAATTTGTG	6	-	913	1596
ENSDARG00000009695	ENSDART00000038725	8	9	9	GTCTACAACAATAAAGCCTTGGTC	6	-	967	1596
ENSDARG00000009695	ENSDART00000038725	8	10	10	ATCTGCGCACCTCCGGCTGTGGAG	6	-	1088	1596
ENSDARG00000009695	ENSDART00000038725	8	11	11	CACTGCGCATGACAGCAGTGGCT	5	-	1179	1596
ENSDARG00000009695	ENSDART00000038725	8	13	13	ATCTTCAGCATCAGGGCTTTGTAC	6	-	1426	1596
ENSDARG00000009695	ENSDART00000038725	8	13	13	ATCTTCAGCATCAGGGCTTTGTA	5	-	1427	1596
ENSDARG00000009748	ENSDART00000005989	8	1	1	AACTTCAGATTTGCGGAAGGCGAA	6	+	20	1035
ENSDARG00000009748	ENSDART00000005989	8	1	1	AGAAAATACGGAATTGCGGCTGT	5	+	100	1035
ENSDARG00000009748	ENSDART00000005989	8	1	1	AGAAAATACGGAATTGCGGCTGTT	6	+	100	1035
ENSDARG00000009748	ENSDART00000005989	8	1	1	AGAAACTTCAGATTTGCGGAAGGC	6	+	17	1035
ENSDARG00000009748	ENSDART00000005989	8	2	2	GTCTGCTTATACGAGGATGGGAC	5	+	187	1035
ENSDARG00000009748	ENSDART00000005989	8	3	3	AGAAACACAGAGGAGCTGCTGGT	5	+	328	1035
ENSDARG00000009748	ENSDART00000005989	8	6	6	AACAGCTGCAATTTTCTGCATTC	5	+	751	1035
ENSDARG00000009901	ENSDART00000062385	8	3	3	AACCTCAGCAATGCTATAATGGGCA	7	+	178	1449
ENSDARG00000009901	ENSDART00000062385	8	3	3	ACCTCAGCAATGCTATAATGGGCA	6	+	179	1449
ENSDARG00000009901	ENSDART00000062385	8	4	4	TTCTTCAGATTTCTGTTGATAAC	5	+	250	1449
ENSDARG00000009901	ENSDART00000062385	8	4	4	CTATCCATCTGCTTCTGAGGAGTGC	7	+	296	1449
ENSDARG00000009901	ENSDART00000062385	8	7	7	TACCTCATCATTATTGTTAGTGTCT	7	+	529	1449
ENSDARG00000009901	ENSDART00000062385	8	8	8	GGCTTCTCCCTCAGCTGCATGGTCT	7	+	610	1449
ENSDARG00000009901	ENSDART00000062385	8	9	9	CTCCACCACTGAAATATGCGAAGCC	7	+	765	1449
ENSDARG00000009901	ENSDART00000062385	8	10	10	TTCCTATTATTGCATTTGCATTT	5	+	827	1449
ENSDARG00000009901	ENSDART00000062385	8	12	12	AACGACATCCTGATGTTGTGTGTTC	7	+	1033	1449
ENSDARG00000009901	ENSDART00000062385	8	12	12	AACGACATCCTGATGTTGTGTGT	5	+	1033	1449
ENSDARG00000009901	ENSDART00000062385	8	12	12	AAAAACGACATCCTGATGTTGTG	5	+	1030	1449
ENSDARG00000009901	ENSDART00000062385	8	13	13	ATCTTCGGCTTCATCGGTGAGTTG	6	+	1240	1449
ENSDARG00000009901	ENSDART00000062385	8	14	14	TACATCGTCCCTGAGGAGCAGGA	5	+	1309	1449
ENSDARG00000009985	ENSDART00000060801	8	4	4	TTCCTCAAATAATACAGCTGCTGGA	7	+	248	810
ENSDARG00000009985	ENSDART00000060801	8	4	4	TGCAGCTACCATATGAGAAGATTGT	7	+	176	810
ENSDARG00000009985	ENSDART00000060801	8	4	4	TACAGCTGCTGGATTGGTATGAGAC	7	+	260	810
ENSDARG00000009985	ENSDART00000060801	8	4	4	CTCAAATAATACAGCTGCTGGATTG	7	+	251	810
ENSDARG00000009985	ENSDART00000060801	8	4	4	CTATTCAACATTCTGTGGTGTGT	5	+	543	810
ENSDARG00000009985	ENSDART00000060801	8	4	4	CAATACACATTGGTGCTGGAGCG	5	+	292	810
ENSDARG00000009985	ENSDART00000060801	8	4	4	AGCCAATACACATTGGTGCTGGA	5	+	289	810
ENSDARG00000009985	ENSDART00000060801	8	5	5	TGCTCCTCCGGAGTTTTCTGATTGT	7	+	573	810
ENSDARG00000010051	ENSDART00000034968	8	2	2	CTCCACATCTGAGCGGTCGTTGGG	6	-	109	924
ENSDARG00000010051	ENSDART00000034968	8	2	2	TTCTCCACATCTGAGCGGTCGTT	5	-	112	924
ENSDARG00000010051	ENSDART00000034968	8	2	2	GGCTCAAACATGTTGAAGGAGAA	5	-	13	924
ENSDARG00000010051	ENSDART00000034968	8	3	3	GTCCAAAGCAGACGGGGGCATAA	5	-	149	924
ENSDARG00000010051	ENSDART00000034968	8	4	4	TTATACCCAGTGCGGGAGGTAAC	5	-	284	924
ENSDARG00000010051	ENSDART00000034968	8	5	5	GCATACACAGCTTTAGGATTTGTG	6	-	414	924
ENSDARG00000010051	ENSDART00000034968	8	8	8	ACATACTGCTGGTTCTTCTGGATGC	7	-	624	924
ENSDARG00000010051	ENSDART00000034968	8	11	11	GCACTCACCAAGTCTGTTTTGCG	5	-	847	924
ENSDARG00000010051	ENSDART00000034968	8	11	11	CACTCACCAAGTCTGTTTTGCGGGG	7	-	844	924
ENSDARG00000010051	ENSDART00000034968	8	11	11	CACCAAGTCTGTTTTGCGGGGCT	5	-	842	924
ENSDARG00000010051	ENSDART00000034968	8	12	12	TTCCCCAGAGAACGCGATGAAGTT	6	-	877	924
ENSDARG00000010051	ENSDART00000101554	8	1	1	CTCCACATCTGAGCGGTCGTTGGG	6	-	106	297
ENSDARG00000010051	ENSDART00000101554	8	1	1	GGCTCAAACATGTTGAAGGAGAA	5	-	10	297
ENSDARG00000010051	ENSDART00000101554	8	1	1	TTCTCCACATCTGAGCGGTCGTT	5	-	109	297
ENSDARG00000010051	ENSDART00000101554	8	2	2	GTCCAAAGCAGACGGGGGCATAA	5	-	146	297
ENSDARG00000010051	ENSDART00000101554	8	3	3	TTATACCCAGTGCGGGAGGTAAC	5	-	281	297
ENSDARG00000010070	ENSDART00000040066	8	1	1	TTATCCACATAAAGGCGTTTTTAAC	7	-	37	813
ENSDARG00000010070	ENSDART00000040066	8	1	1	GCAGTCGACGAGTGTGTGAAGCA	5	-	62	813
ENSDARG00000010070	ENSDART00000040066	8	1	1	CTCACCTCCACAGCAGTCGACGAG	6	-	73	813
ENSDARG00000010070	ENSDART00000040066	8	1	1	CACCTCCACAGCAGTCGACGAGTGT	7	-	70	813
ENSDARG00000010070	ENSDART00000040066	8	1	1	ACCTCCACAGCAGTCGACGAGTGT	6	-	70	813
ENSDARG00000010070	ENSDART00000040066	8	7	7	AGCTCCACATAGTGTGTCTGGTGTA	7	-	641	813
ENSDARG00000010070	ENSDART00000040066	8	7	7	AGCTCCACATAGTGTGTCTGGTGT	6	-	642	813
ENSDARG00000010120	ENSDART00000023316	8	1	1	AAATTCACCTTTTTCTTTGCCTTT	6	-	51	1749
ENSDARG00000010120	ENSDART00000023316	8	1	1	GCCGTCAACACCTCCTGCGCCGCC	6	-	12	1749
ENSDARG00000010120	ENSDART00000023316	8	2	2	TTACTCTCCTCTTCGGTTGCTTTG	6	-	111	1749
ENSDARG00000010120	ENSDART00000023316	8	2	2	TTCTTCCTCTTCTCTGTGTGGGGTT	7	-	152	1749
ENSDARG00000010120	ENSDART00000023316	8	2	2	CTCCTCTTCGGTTGCTTTGTTTTG	6	-	106	1749
ENSDARG00000010120	ENSDART00000023316	8	2	2	TTCCTCTTCTCTGTGTGGGGTTT	5	-	151	1749
ENSDARG00000010120	ENSDART00000023316	8	2	2	TTCCTCTTCTCTGTGTGGGGTTTC	6	-	150	1749
ENSDARG00000010120	ENSDART00000023316	8	2	2	TTCCTCTTCTCTGTGTGGGGTTTCT	7	-	149	1749
ENSDARG00000010120	ENSDART00000023316	8	2	2	TTCTTCCCAATAGCGCTTTGCAGGC	7	-	66	1749
ENSDARG00000010120	ENSDART00000023316	8	2	2	TTCTTCCTCTTCTCTGTGTGGGG	5	-	154	1749
ENSDARG00000010120	ENSDART00000023316	8	2	2	TTCTTCCTCTTCTCTGTGTGGGGT	6	-	153	1749
ENSDARG00000010120	ENSDART00000023316	8	4	4	CCCAGCATCCTCTGGGAGCAGGA	5	-	371	1749
ENSDARG00000010120	ENSDART00000023316	8	4	4	AGCATCCTCTGGGAGCAGGAGAC	5	-	368	1749
ENSDARG00000010120	ENSDART00000023316	8	4	4	TACCCAGCATCCTCTGGGAGCAGGA	7	-	371	1749
ENSDARG00000010120	ENSDART00000023316	8	6	6	GGCCCAAACTGGGAGAGATGCAGGT	7	-	488	1749
ENSDARG00000010120	ENSDART00000023316	8	7	7	TCCCGCCCAGCAACAGGTGCCTGT	6	-	539	1749
ENSDARG00000010120	ENSDART00000023316	8	7	7	ATCTCACACATCAGGTGTTTGGTCT	7	-	593	1749
ENSDARG00000010120	ENSDART00000023316	8	7	7	ATCTCACACATCAGGTGTTTGGTC	6	-	594	1749
ENSDARG00000010120	ENSDART00000023316	8	7	7	ATCTCACACATCAGGTGTTTGGT	5	-	595	1749
ENSDARG00000010120	ENSDART00000023316	8	8	8	TGCATCCGCAAGACGTCGTTGAA	5	-	742	1749
ENSDARG00000010120	ENSDART00000023316	8	8	8	AACTGCATCCGCAAGACGTCGTT	5	-	745	1749
ENSDARG00000010120	ENSDART00000023316	8	9	9	GGCGACCACAGGCTGACGGTGCC	5	-	934	1749
ENSDARG00000010120	ENSDART00000023316	8	12	12	CTCCCACTCCTGCCTCTGTTTAG	5	-	1391	1749
ENSDARG00000010120	ENSDART00000023316	8	12	12	ACCTCCCACTCCTGCCTCTGTTTAG	7	-	1391	1749
ENSDARG00000010120	ENSDART00000023316	8	14	14	CTCTTCAACAGTCTGTCGGATTT	5	-	1649	1749
ENSDARG00000010120	ENSDART00000084063	8	1	1	AAATTCACCTTTTTCTTTGCCTTT	6	-	51	1755
ENSDARG00000010120	ENSDART00000084063	8	1	1	GCCGTCAACACCTCCTGCGCCGCC	6	-	12	1755
ENSDARG00000010120	ENSDART00000084063	8	2	2	TTCCTCTTCTCTGTGTGGGGTTTCT	7	-	149	1755
ENSDARG00000010120	ENSDART00000084063	8	2	2	TTCCTCTTCTCTGTGTGGGGTTTC	6	-	150	1755
ENSDARG00000010120	ENSDART00000084063	8	2	2	TTCCTCTTCTCTGTGTGGGGTTT	5	-	151	1755
ENSDARG00000010120	ENSDART00000084063	8	2	2	TTCTTCCTCTTCTCTGTGTGGGG	5	-	154	1755
ENSDARG00000010120	ENSDART00000084063	8	2	2	TTCTTCCTCTTCTCTGTGTGGGGT	6	-	153	1755
ENSDARG00000010120	ENSDART00000084063	8	2	2	CTCCTCTTCGGTTGCTTTGTTTTG	6	-	106	1755
ENSDARG00000010120	ENSDART00000084063	8	2	2	TTACTCTCCTCTTCGGTTGCTTTG	6	-	111	1755
ENSDARG00000010120	ENSDART00000084063	8	2	2	TTCTTCCCAATAGCGCTTTGCAGGC	7	-	66	1755
ENSDARG00000010120	ENSDART00000084063	8	2	2	TTCTTCCTCTTCTCTGTGTGGGGTT	7	-	152	1755
ENSDARG00000010120	ENSDART00000084063	8	5	5	AGCATCCTCTGGGAGCAGGAGAC	5	-	371	1755
ENSDARG00000010120	ENSDART00000084063	8	5	5	CCCAGCATCCTCTGGGAGCAGGA	5	-	374	1755
ENSDARG00000010120	ENSDART00000084063	8	5	5	TACCCAGCATCCTCTGGGAGCAGGA	7	-	374	1755
ENSDARG00000010120	ENSDART00000084063	8	7	7	GGCCCAAACTGGGAGAGATGCAGGT	7	-	491	1755
ENSDARG00000010120	ENSDART00000084063	8	8	8	ATCTCACACATCAGGTGTTTGGT	5	-	601	1755
ENSDARG00000010120	ENSDART00000084063	8	8	8	ATCTCACACATCAGGTGTTTGGTC	6	-	600	1755
ENSDARG00000010120	ENSDART00000084063	8	8	8	ATCTCACACATCAGGTGTTTGGTCT	7	-	599	1755
ENSDARG00000010120	ENSDART00000084063	8	8	8	TCCCGCCCAGCAACAGGTGCCTGT	6	-	545	1755
ENSDARG00000010120	ENSDART00000084063	8	9	9	TGCATCCGCAAGACGTCGTTGAA	5	-	748	1755
ENSDARG00000010120	ENSDART00000084063	8	9	9	AACTGCATCCGCAAGACGTCGTT	5	-	751	1755
ENSDARG00000010120	ENSDART00000084063	8	10	10	GGCGACCACAGGCTGACGGTGCC	5	-	940	1755
ENSDARG00000010120	ENSDART00000084063	8	13	13	CTCCCACTCCTGCCTCTGTTTAG	5	-	1397	1755
ENSDARG00000010120	ENSDART00000084063	8	13	13	ACCTCCCACTCCTGCCTCTGTTTAG	7	-	1397	1755
ENSDARG00000010120	ENSDART00000084063	8	15	15	CTCTTCAACAGTCTGTCGGATTT	5	-	1655	1755
ENSDARG00000010252	ENSDART00000039884	8	1	1	CGCTGCTAAAGCCAGTGGTGAGAC	6	+	33	3207
ENSDARG00000010252	ENSDART00000039884	8	2	2	CAAATCATCTGTTTAAGAGTGAGGA	7	+	116	3207
ENSDARG00000010252	ENSDART00000039884	8	2	2	GTATCCACCAAATCATCTGTTTAA	6	+	108	3207
ENSDARG00000010252	ENSDART00000039884	8	4	4	GTTTCAGTCCCGCAGTGATTTTGTG	7	+	279	3207
ENSDARG00000010252	ENSDART00000039884	8	4	4	GTTTGCAGCAGGAATGTTTAGGTT	6	+	335	3207
ENSDARG00000010252	ENSDART00000039884	8	4	4	TTCTCCTGCATTGAGTTTGCAGCA	6	+	321	3207
ENSDARG00000010252	ENSDART00000039884	8	5	5	CTCCACCACTCCGGGTGGTTGGAAC	7	+	631	3207
ENSDARG00000010252	ENSDART00000039884	8	5	5	CTCCACCACTCCGGGTGGTTGGAA	6	+	631	3207
ENSDARG00000010252	ENSDART00000039884	8	5	5	CTCCACCACTCCGGGTGGTTGGA	5	+	631	3207
ENSDARG00000010252	ENSDART00000039884	8	5	5	GCCGTCAAAGTGTCCGGAGAGGGA	6	+	679	3207
ENSDARG00000010252	ENSDART00000039884	8	5	5	CCCTCCACCACTCCGGGTGGTTGGA	7	+	629	3207
ENSDARG00000010252	ENSDART00000039884	8	5	5	CCCTCCACCACTCCGGGTGGTTG	5	+	629	3207
ENSDARG00000010252	ENSDART00000039884	8	5	5	CCCCTCCACCACTCCGGGTGGTTG	6	+	628	3207
ENSDARG00000010252	ENSDART00000039884	8	6	6	CTACCATTCAATTGTTTTGAGTA	5	+	784	3207
ENSDARG00000010252	ENSDART00000039884	8	6	6	CTACCATTCAATTGTTTTGAGTAA	6	+	784	3207
ENSDARG00000010252	ENSDART00000039884	8	8	8	GGCCCCACCAAGCCTGCTGGAGGA	6	+	1041	3207
ENSDARG00000010252	ENSDART00000039884	8	8	8	ACAGACGCCCTTTCCTTTGTATCT	6	+	958	3207
ENSDARG00000010252	ENSDART00000039884	8	8	8	GCCCCACCAAGCCTGCTGGAGGA	5	+	1042	3207
ENSDARG00000010252	ENSDART00000039884	8	9	9	ACAAGCTTAAGAAAGCTGGAGGC	5	+	1112	3207
ENSDARG00000010252	ENSDART00000039884	8	11	11	TCCAACAGACTCCTTTGGGGATGGA	7	+	1217	3207
ENSDARG00000010252	ENSDART00000039884	8	15	15	GCAGACATCATGGTGCAGGAGTT	5	+	1747	3207
ENSDARG00000010252	ENSDART00000039884	8	15	15	CCCCGCAGACATCATGGTGCAGGA	6	+	1743	3207
ENSDARG00000010252	ENSDART00000039884	8	16	16	GGCGTCAGCATGTCCTTGCTGGGCA	7	+	1969	3207
ENSDARG00000010252	ENSDART00000039884	8	18	18	AGCTCAGACCGTCCTGCAGGAGCA	6	+	2243	3207
ENSDARG00000010252	ENSDART00000039884	8	20	20	AAAAGCAACAGGAGGATGTTTTT	5	+	2336	3207
ENSDARG00000010252	ENSDART00000039884	8	21	21	ATCAGCTCCCTGCACTGTGACTAC	6	+	2530	3207
ENSDARG00000010252	ENSDART00000039884	8	22	22	GCACAAAACTGGTGATGGAGTATCT	7	+	2597	3207
ENSDARG00000010252	ENSDART00000039884	8	24	24	CAAGTCAGATGTGTGGAGTTTTG	5	+	2925	3207
ENSDARG00000010252	ENSDART00000039884	8	25	25	TTCTCAAGAATAACTGGAGATTAC	6	+	3068	3207
ENSDARG00000010252	ENSDART00000049469	8	1	1	GACTCAGCCCTGCAGGTGCATCT	5	+	52	3282
ENSDARG00000010252	ENSDART00000049469	8	1	1	CGCTGCTAAAGCCAGTGGTGAGAC	6	+	156	3282
ENSDARG00000010252	ENSDART00000049469	8	2	2	CAAATCATCTGTTTAAGAGTGAGGA	7	+	239	3282
ENSDARG00000010252	ENSDART00000049469	8	2	2	GTATCCACCAAATCATCTGTTTAA	6	+	231	3282
ENSDARG00000010252	ENSDART00000049469	8	4	4	GTTTGCAGCAGGAATGTTTAGGTT	6	+	458	3282
ENSDARG00000010252	ENSDART00000049469	8	4	4	GTTTCAGTCCCGCAGTGATTTTGTG	7	+	402	3282
ENSDARG00000010252	ENSDART00000049469	8	4	4	TTCTCCTGCATTGAGTTTGCAGCA	6	+	444	3282
ENSDARG00000010252	ENSDART00000049469	8	5	5	CTCCACCACTCCGGGTGGTTGGAAC	7	+	754	3282
ENSDARG00000010252	ENSDART00000049469	8	5	5	CTCCACCACTCCGGGTGGTTGGAA	6	+	754	3282
ENSDARG00000010252	ENSDART00000049469	8	5	5	CTCCACCACTCCGGGTGGTTGGA	5	+	754	3282
ENSDARG00000010252	ENSDART00000049469	8	5	5	CCCTCCACCACTCCGGGTGGTTGGA	7	+	752	3282
ENSDARG00000010252	ENSDART00000049469	8	5	5	CCCTCCACCACTCCGGGTGGTTG	5	+	752	3282
ENSDARG00000010252	ENSDART00000049469	8	5	5	CCCCTCCACCACTCCGGGTGGTTG	6	+	751	3282
ENSDARG00000010252	ENSDART00000049469	8	5	5	GCCGTCAAAGTGTCCGGAGAGGGA	6	+	802	3282
ENSDARG00000010252	ENSDART00000049469	8	7	7	ACAGACGCCCTTTCCTTTGTATCT	6	+	1003	3282
ENSDARG00000010252	ENSDART00000049469	8	7	7	GGCCCCACCAAGCCTGCTGGAGGA	6	+	1086	3282
ENSDARG00000010252	ENSDART00000049469	8	7	7	GCCCCACCAAGCCTGCTGGAGGA	5	+	1087	3282
ENSDARG00000010252	ENSDART00000049469	8	8	8	ACAAGCTTAAGAAAGCTGGAGGC	5	+	1157	3282
ENSDARG00000010252	ENSDART00000049469	8	9	9	TCCAACAGACTCCTTTGGGGATGGA	7	+	1244	3282
ENSDARG00000010252	ENSDART00000049469	8	13	13	CCCCGCAGACATCATGGTGCAGGA	6	+	1770	3282
ENSDARG00000010252	ENSDART00000049469	8	13	13	GCAGACATCATGGTGCAGGAGTT	5	+	1774	3282
ENSDARG00000010252	ENSDART00000049469	8	14	14	GGCGTCAGCATGTCCTTGCTGGGCA	7	+	1996	3282
ENSDARG00000010252	ENSDART00000049469	8	16	16	AGCTCAGACCGTCCTGCAGGAGCA	6	+	2270	3282
ENSDARG00000010252	ENSDART00000049469	8	17	17	AAAAGCAACAGGAGGATGTTTTT	5	+	2402	3282
ENSDARG00000010252	ENSDART00000049469	8	18	18	ATCAGCTCCCTGCACTGTGACTAC	6	+	2596	3282
ENSDARG00000010252	ENSDART00000049469	8	19	19	GCACAAAACTGGTGATGGAGTATCT	7	+	2663	3282
ENSDARG00000010252	ENSDART00000049469	8	21	21	CAAGTCAGATGTGTGGAGTTTTG	5	+	2991	3282
ENSDARG00000010252	ENSDART00000049469	8	22	22	TTCTCAAGAATAACTGGAGATTAC	6	+	3134	3282
ENSDARG00000010294	ENSDART00000019822	8	2	2	TTACAAAACAACAACTTAAGTCGTG	7	+	412	1047
ENSDARG00000010294	ENSDART00000019822	8	2	2	TACAAAACAACAACTTAAGTCGTG	6	+	413	1047
ENSDARG00000010294	ENSDART00000019822	8	2	2	GGCATCACAAATGGGGTCTTTGAT	6	+	283	1047
ENSDARG00000010294	ENSDART00000019822	8	2	2	GCCAACGGCCTGATTTGCGCTTTG	6	+	722	1047
ENSDARG00000010294	ENSDART00000019822	8	2	2	GCACCAGCCTAGAGAATCTGTATCT	7	+	863	1047
ENSDARG00000010294	ENSDART00000019822	8	2	2	GCAAGCTACAACATGTGCCGTTTGT	7	+	212	1047
ENSDARG00000010294	ENSDART00000019822	8	2	2	CAAAACAACAACTTAAGTCGTGTTC	7	+	415	1047
ENSDARG00000010294	ENSDART00000019822	8	2	2	ACAGGCATCACAAATGGGGTCTTT	6	+	280	1047
ENSDARG00000010294	ENSDART00000019822	8	3	3	AGCAGCTTCTGCAGAGTTGTGGAC	6	+	919	1047
ENSDARG00000010316	ENSDART00000023780	8	1	1	TTCTTCAACGTTTCCTTAGCTTTC	6	-	57	1371
ENSDARG00000010316	ENSDART00000023780	8	3	3	CACATCGCCCTGAGGGTGGCTTTT	6	-	289	1371
ENSDARG00000010316	ENSDART00000023780	8	3	3	CACATCGCCCTGAGGGTGGCTTT	5	-	290	1371
ENSDARG00000010316	ENSDART00000023780	8	3	3	CACAAAGTCCAAAGCCGCTGAGGAA	7	-	264	1371
ENSDARG00000010316	ENSDART00000023780	8	4	4	GCCAACAGCTGATCTTTGTGTTT	5	-	400	1371
ENSDARG00000010316	ENSDART00000023780	8	7	7	ATCTTCACATCTTTTTCTGGTGCT	6	-	591	1371
ENSDARG00000010316	ENSDART00000023780	8	10	10	GAAACCAAAATTGAAGTTGATTGC	6	-	853	1371
ENSDARG00000010316	ENSDART00000023780	8	11	11	AGCCACTCCACCATGTCTTTGAT	5	-	958	1371
ENSDARG00000010316	ENSDART00000023780	8	11	11	TTCCTCCTCTTTCTCTGGGTTTGTG	7	-	918	1371
ENSDARG00000010316	ENSDART00000023780	8	11	11	TTCCTCCTCTTTCTCTGGGTTTGT	6	-	919	1371
ENSDARG00000010316	ENSDART00000023780	8	11	11	TACCGCAGAAAACAGATGCCGTT	5	-	889	1371
ENSDARG00000010316	ENSDART00000023780	8	11	11	CACTCCACCATGTCTTTGATGGC	5	-	955	1371
ENSDARG00000010316	ENSDART00000060919	8	1	1	TTCTTCAACGTTTCCTTAGCTTTC	6	-	57	2328
ENSDARG00000010316	ENSDART00000060919	8	3	3	CACATCGCCCTGAGGGTGGCTTT	5	-	290	2328
ENSDARG00000010316	ENSDART00000060919	8	3	3	CACAAAGTCCAAAGCCGCTGAGGAA	7	-	264	2328
ENSDARG00000010316	ENSDART00000060919	8	3	3	CACATCGCCCTGAGGGTGGCTTTT	6	-	289	2328
ENSDARG00000010316	ENSDART00000060919	8	4	4	GCCAACAGCTGATCTTTGTGTTT	5	-	400	2328
ENSDARG00000010316	ENSDART00000060919	8	7	7	ATCTTCACATCTTTTTCTGGTGCT	6	-	591	2328
ENSDARG00000010316	ENSDART00000060919	8	10	10	GAAACCAAAATTGAAGTTGATTGC	6	-	859	2328
ENSDARG00000010316	ENSDART00000060919	8	11	11	TACCGCAGAAAACAGATGCCGTT	5	-	895	2328
ENSDARG00000010316	ENSDART00000060919	8	11	11	CACTCCACCATGTCTTTGATGGC	5	-	961	2328
ENSDARG00000010316	ENSDART00000060919	8	11	11	TTCCTCCTCTTTCTCTGGGTTTGT	6	-	925	2328
ENSDARG00000010316	ENSDART00000060919	8	11	11	TTCCTCCTCTTTCTCTGGGTTTGTG	7	-	924	2328
ENSDARG00000010316	ENSDART00000060919	8	11	11	AGCCACTCCACCATGTCTTTGAT	5	-	964	2328
ENSDARG00000010316	ENSDART00000060919	8	16	16	CACGTCTCCTGAGAGCTGTGAGGGT	7	-	1564	2328
ENSDARG00000010316	ENSDART00000060919	8	17	17	ACACGCCTCCAGCAGGTGTGGCT	5	-	1658	2328
ENSDARG00000010316	ENSDART00000060919	8	17	17	ACACACGCCTCCAGCAGGTGTGGCT	7	-	1658	2328
ENSDARG00000010316	ENSDART00000060919	8	18	18	AAAAACACCTCTCTGAAGTCGCT	5	-	1861	2328
ENSDARG00000010316	ENSDART00000060919	8	18	18	AAAAAACACCTCTCTGAAGTCGCT	6	-	1861	2328
ENSDARG00000010316	ENSDART00000060919	8	19	19	CAAGCCCACTGACTGATCTGGAGTC	7	-	1902	2328
ENSDARG00000010316	ENSDART00000060919	8	21	21	AACTTCCGCCGGGTCCTCTGGGTTT	7	-	2109	2328
ENSDARG00000010347	ENSDART00000023797	8	5	5	CTCCACAAACAGAGAGTAGAGGAT	6	-	526	861
ENSDARG00000010347	ENSDART00000023797	8	6	6	CTCACCAGATACCGTGCAGATAAC	6	-	677	861
ENSDARG00000010408	ENSDART00000004986	8	2	2	GTTCTCATCTCTACTGAAGGTGAA	6	+	172	2664
ENSDARG00000010408	ENSDART00000004986	8	3	3	AGCCCCTGCTGGCTGGTGTGATTG	6	+	239	2664
ENSDARG00000010408	ENSDART00000004986	8	3	3	CACCCAGTCTCCTGGCCTTTGTT	5	+	212	2664
ENSDARG00000010408	ENSDART00000004986	8	4	4	CCCCTCTGCCTTCCAGAAGAGTTC	6	+	366	2664
ENSDARG00000010408	ENSDART00000004986	8	5	5	TTACCCTACGACCATAAGAGGGG	5	+	2038	2664
ENSDARG00000010408	ENSDART00000004986	8	5	5	TGCAAAGCCTTTCTGAAGGAAAC	5	+	1556	2664
ENSDARG00000010408	ENSDART00000004986	8	5	5	GCACTACACAGCAAGTCGAAGAG	5	+	1257	2664
ENSDARG00000010408	ENSDART00000004986	8	5	5	CTACACAGCAAGTCGAAGAGTAC	5	+	1260	2664
ENSDARG00000010408	ENSDART00000004986	8	5	5	CACTACACAGCAAGTCGAAGAGTAC	7	+	1258	2664
ENSDARG00000010408	ENSDART00000004986	8	5	5	AGAGTCAGCTGGAGGAGGAGCTGCC	7	+	1760	2664
ENSDARG00000010408	ENSDART00000004986	8	5	5	ACAGTCGCCTAGTAGAGGCAGTG	5	+	723	2664
ENSDARG00000010408	ENSDART00000004986	8	5	5	ACAAACGCACAAACGGAGATGCC	5	+	808	2664
ENSDARG00000010408	ENSDART00000004986	8	5	5	AACCACTTCCGCAATTAGAAGCA	5	+	2567	2664
ENSDARG00000010408	ENSDART00000004986	8	5	5	AACAAACGCACAAACGGAGATGCC	6	+	807	2664
ENSDARG00000010572	ENSDART00000027214	8	1	1	TTCTCCACATACCGAAGATGGAGGA	7	+	142	1407
ENSDARG00000010572	ENSDART00000027214	8	1	1	GTTCTCCACATACCGAAGATGGA	5	+	141	1407
ENSDARG00000010572	ENSDART00000027214	8	5	5	AGCACCTAACTGGGATGTGGTGGAG	7	+	548	1407
ENSDARG00000010572	ENSDART00000027214	8	5	5	AGCACCTAACTGGGATGTGGTGGA	6	+	548	1407
ENSDARG00000010572	ENSDART00000027214	8	8	8	GTTCTCAAAACTCGTCTGGCGTT	5	+	916	1407
ENSDARG00000010572	ENSDART00000027214	8	8	8	AAACACATCCTGAAGACTGAGGG	5	+	979	1407
ENSDARG00000010572	ENSDART00000027214	8	10	10	GTCAGCATCAGCTATGTGGTGTA	5	+	1357	1407
ENSDARG00000010572	ENSDART00000027214	8	10	10	GTCAGCATCAGCTATGTGGTGTAC	6	+	1357	1407
ENSDARG00000010572	ENSDART00000027214	8	10	10	CAAGTCCACATTAGGTGTGCGGTC	6	+	1389	1407
ENSDARG00000010710	ENSDART00000041634	8	9	9	TTCCTATGCCCAGCATGAAGGCGTC	7	-	628	1092
ENSDARG00000010710	ENSDART00000041634	8	11	11	TGCGGCTGCCGCCATGGGGTTGTA	6	-	757	1092
ENSDARG00000010710	ENSDART00000041634	8	11	11	TGCGGCTGCCGCCATGGGGTTGTAA	7	-	756	1092
ENSDARG00000010710	ENSDART00000041634	8	11	11	CACAGCTGCTGCTGCTGCGGCTGCC	7	-	771	1092
ENSDARG00000010710	ENSDART00000041634	8	11	11	CACAGCTGCTGCTGCTGCGGCTGC	6	-	772	1092
ENSDARG00000010710	ENSDART00000041634	8	11	11	AGCTGCTGCTGCTGCGGCTGCCGCC	7	-	768	1092
ENSDARG00000010710	ENSDART00000041634	8	11	11	GACCACAGCTGCTGCTGCTGCGGCT	7	-	774	1092
ENSDARG00000010710	ENSDART00000041634	8	11	11	TGCGGCTGCCGCCATGGGGTTGT	5	-	758	1092
ENSDARG00000010710	ENSDART00000041634	8	12	12	GCCATCGGCCCAGGGCTGCTGGT	5	-	943	1092
ENSDARG00000010710	ENSDART00000041634	8	12	12	GACTCACCCCGAGGCTGTGGCTGAA	7	-	1045	1092
ENSDARG00000010710	ENSDART00000041634	8	12	12	AAACCCCGCTGAGCGAGAAGGAGTT	7	-	912	1092
ENSDARG00000010862	ENSDART00000011704	8	6	6	TTCTCCAGAAGGGTGTGGGTGAT	5	+	599	1227
ENSDARG00000010862	ENSDART00000011704	8	7	7	ACAGTCTTAGGCTGGAGGCGGGA	5	+	815	1227
ENSDARG00000010862	ENSDART00000011704	8	8	8	ACACCCATCCTGTCCTCTGATGGC	6	+	1030	1227
ENSDARG00000010862	ENSDART00000011704	8	8	8	CACCCATCCTGTCCTCTGATGGC	5	+	1031	1227
ENSDARG00000010862	ENSDART00000087151	8	6	6	TTCTCCAGAAGGGTGTGGGTGAT	5	+	599	1227
ENSDARG00000010862	ENSDART00000087151	8	7	7	ACAGTCTTAGGCTGGAGGCGGGA	5	+	815	1227
ENSDARG00000010862	ENSDART00000087151	8	8	8	CACCCATCCTGTCCTCTGATGGC	5	+	1031	1227
ENSDARG00000010862	ENSDART00000087151	8	8	8	ACACCCATCCTGTCCTCTGATGGC	6	+	1030	1227
ENSDARG00000010862	ENSDART00000087152	8	2	2	ACACCCATCCTGTCCTCTGATGGC	6	+	139	336
ENSDARG00000010862	ENSDART00000087152	8	2	2	CACCCATCCTGTCCTCTGATGGC	5	+	140	336
ENSDARG00000010933	ENSDART00000011078	8	1	1	GACAAAAAAGAGCTGGAGGAGCC	5	+	8	4668
ENSDARG00000010933	ENSDART00000011078	8	1	1	CTATTCGCATGGCAGCTCTGGCTCT	7	+	104	4668
ENSDARG00000010933	ENSDART00000011078	8	2	2	CACCAACCACAATCTGGTGAGTT	5	+	231	4668
ENSDARG00000010933	ENSDART00000011078	8	2	2	GCCACCAACCACAATCTGGTGAG	5	+	229	4668
ENSDARG00000010933	ENSDART00000011078	8	2	2	GCCACCAACCACAATCTGGTGAGTT	7	+	229	4668
ENSDARG00000010933	ENSDART00000011078	8	2	2	CACCAACCACAATCTGGTGAGTTT	6	+	231	4668
ENSDARG00000010933	ENSDART00000011078	8	2	2	ACCAACCACAATCTGGTGAGTTT	5	+	232	4668
ENSDARG00000010933	ENSDART00000011078	8	2	2	GCCATCTTCGCAAATTGTGTTGCT	6	+	166	4668
ENSDARG00000010933	ENSDART00000011078	8	2	2	GTCCAAACCGTTTCCTGAGGATGAT	7	+	198	4668
ENSDARG00000010933	ENSDART00000011078	8	3	3	GCCTACATCCGCAGCGGGTGGAAC	6	+	334	4668
ENSDARG00000010933	ENSDART00000011078	8	4	4	GCAGACAGCCATCATGCAGCCGGT	6	+	430	4668
ENSDARG00000010933	ENSDART00000011078	8	4	4	CACTTCGTCTAGTGTCTGGTGTG	5	+	506	4668
ENSDARG00000010933	ENSDART00000011078	8	4	4	GACCACTTCGTCTAGTGTCTGGTGT	7	+	503	4668
ENSDARG00000010933	ENSDART00000011078	8	6	6	TCCAACACCATGTGCTTTTGCCGGT	7	+	705	4668
ENSDARG00000010933	ENSDART00000011078	8	8	8	AGAAACAGCAGATGGAGGAGGAC	5	+	1046	4668
ENSDARG00000010933	ENSDART00000011078	8	15	15	AGCAAATAAGATCCTTCTGGCTCT	6	+	1404	4668
ENSDARG00000010933	ENSDART00000011078	8	15	15	GCACTCTTCAATCGTTTTGATTGT	6	+	1486	4668
ENSDARG00000010933	ENSDART00000011078	8	15	15	ATCTTCAAAGTCACAAGGTGATTCT	7	+	1609	4668
ENSDARG00000010933	ENSDART00000011078	8	24	24	CTCATCTTCATTATACTTAGTAGTT	7	+	2374	4668
ENSDARG00000010933	ENSDART00000011078	8	27	27	AGATTCTTAGAGTTTTGCGAGTGC	6	+	2639	4668
ENSDARG00000010933	ENSDART00000011078	8	30	30	GAACCATCCAATGGTGAGGGAGAG	6	+	2898	4668
ENSDARG00000010933	ENSDART00000011078	8	32	32	CTCAACACACTCACGTTGGCTGT	5	+	3346	4668
ENSDARG00000010933	ENSDART00000011078	8	32	32	TGCTCAACACACTCACGTTGGCTGT	7	+	3344	4668
ENSDARG00000010933	ENSDART00000011078	8	33	33	AAACTCTTCAACTCTGTGATGGA	5	+	3388	4668
ENSDARG00000010933	ENSDART00000011078	8	39	39	GCACTCATCACCTCGATGAGTTT	5	+	4088	4668
ENSDARG00000010933	ENSDART00000011078	8	40	40	GAATTCAGCCTCCACTGGGGTTTG	6	+	4187	4668
ENSDARG00000010933	ENSDART00000011078	8	40	40	TTCAGCCTCCACTGGGGTTTGGAA	6	+	4190	4668
ENSDARG00000010933	ENSDART00000011078	8	40	40	TTCAGCCTCCACTGGGGTTTGGA	5	+	4190	4668
ENSDARG00000010933	ENSDART00000011078	8	42	42	AAACCCAAACTCCTAGATGAAGTT	6	+	4408	4668
ENSDARG00000010933	ENSDART00000011078	8	42	42	AACCCAAACTCCTAGATGAAGTT	5	+	4409	4668
ENSDARG00000010933	ENSDART00000011078	8	44	44	AGATGCGACTAGCTATGGCGATGGA	7	+	4607	4668
ENSDARG00000011027	ENSDART00000024882	8	1	1	ACCCTCATCTTGGATGGCTGGTCT	6	-	88	2424
ENSDARG00000011027	ENSDART00000024882	8	1	1	CCCTGCGACTGAAGAGCTTGAGTT	6	-	63	2424
ENSDARG00000011027	ENSDART00000024882	8	2	2	GAATCCAGAGTGTACGATGTGGGC	6	-	120	2424
ENSDARG00000011027	ENSDART00000024882	8	4	4	TTAAGCCACTTGAGCGTCGGTGTA	6	-	528	2424
ENSDARG00000011027	ENSDART00000024882	8	4	4	TTCTCCATCTTATCAGGTTGAGCC	6	-	441	2424
ENSDARG00000011027	ENSDART00000024882	8	5	5	GTTTTCCACCAGGCAGGTGTAGTT	6	-	655	2424
ENSDARG00000011027	ENSDART00000024882	8	5	5	GTTTTCCACCAGGCAGGTGTAGTTT	7	-	654	2424
ENSDARG00000011027	ENSDART00000024882	8	6	6	CACCACTGCGGTACGGTTTGCAGGC	7	-	759	2424
ENSDARG00000011027	ENSDART00000024882	8	6	6	GTTTCAGCCACTGAATGTGAGGCT	6	-	827	2424
ENSDARG00000011027	ENSDART00000024882	8	6	6	TTCAGCCACTGAATGTGAGGCTGAG	7	-	824	2424
ENSDARG00000011027	ENSDART00000024882	8	7	7	TCCATCTCCTTATCCGTGGTGTTG	6	-	924	2424
ENSDARG00000011027	ENSDART00000024882	8	7	7	AAAGACACATTCCTGATCTGCAGTA	7	-	950	2424
ENSDARG00000011027	ENSDART00000024882	8	7	7	ATCTCCTTATCCGTGGTGTTGAC	5	-	922	2424
ENSDARG00000011027	ENSDART00000024882	8	8	8	CCCACCATCACACAGATGAGGAA	5	-	1123	2424
ENSDARG00000011027	ENSDART00000024882	8	8	8	ACCATCACACAGATGAGGAAGAA	5	-	1120	2424
ENSDARG00000011027	ENSDART00000024882	8	8	8	TCCCCACCATCACACAGATGAGGAA	7	-	1123	2424
ENSDARG00000011027	ENSDART00000024882	8	11	11	GCAGGCTCCCAGCAGGTTGATGAT	6	-	1594	2424
ENSDARG00000011027	ENSDART00000024882	8	12	12	TACTCCATCCCTGGTGGACGCCGTA	7	-	1688	2424
ENSDARG00000011027	ENSDART00000024882	8	12	12	AGCAGCAAACTCCACGATGACGTA	6	-	1636	2424
ENSDARG00000011027	ENSDART00000024882	8	14	14	GTACACGTCACTTTGATGGGTGT	5	-	1994	2424
ENSDARG00000011027	ENSDART00000024882	8	15	15	CACCCCAAAAGACCAGCTGAGGTC	6	-	2005	2424
ENSDARG00000011027	ENSDART00000024882	8	15	15	CTCCTCGACGGGGACGCCGGGGTA	6	-	2065	2424
ENSDARG00000011027	ENSDART00000024882	8	15	15	ACCCCAAAAGACCAGCTGAGGTC	5	-	2005	2424
ENSDARG00000011027	ENSDART00000024882	8	17	17	GGCCACTCCTCGGTTGGGATGGG	5	-	2399	2424
ENSDARG00000011027	ENSDART00000024882	8	17	17	GGCCACTCCTCGGTTGGGATGGGGT	7	-	2397	2424
ENSDARG00000011027	ENSDART00000024882	8	17	17	AAAGGCCACTCCTCGGTTGGGAT	5	-	2402	2424
ENSDARG00000011027	ENSDART00000024882	8	17	17	GTCTTCACCTGAGGAGCAGGTGGA	6	-	2320	2424
ENSDARG00000011027	ENSDART00000027831	8	1	1	CCCTGCGACTGAAGAGCTTGAGTT	6	-	36	1110
ENSDARG00000011027	ENSDART00000027831	8	1	1	ACCCTCATCTTGGATGGCTGGTCT	6	-	61	1110
ENSDARG00000011027	ENSDART00000027831	8	2	2	GAATCCAGAGTGTACGATGTGGGC	6	-	93	1110
ENSDARG00000011027	ENSDART00000027831	8	4	4	TTAAGCCACTTGAGCGTCGGTGTA	6	-	501	1110
ENSDARG00000011027	ENSDART00000027831	8	4	4	TTCTCCATCTTATCAGGTTGAGCC	6	-	414	1110
ENSDARG00000011027	ENSDART00000027831	8	5	5	GTTTTCCACCAGGCAGGTGTAGTTT	7	-	627	1110
ENSDARG00000011027	ENSDART00000027831	8	5	5	GTTTTCCACCAGGCAGGTGTAGTT	6	-	628	1110
ENSDARG00000011027	ENSDART00000027831	8	6	6	CACCACTGCGGTACGGTTTGCAGGC	7	-	732	1110
ENSDARG00000011027	ENSDART00000027831	8	6	6	TTCAGCCACTGAATGTGAGGCTGAG	7	-	797	1110
ENSDARG00000011027	ENSDART00000027831	8	6	6	GTTTCAGCCACTGAATGTGAGGCT	6	-	800	1110
ENSDARG00000011027	ENSDART00000027831	8	7	7	GTTGACCCCAGAGTTCTGCGGAG	5	-	878	1110
ENSDARG00000011027	ENSDART00000027831	8	7	7	AGCCACGCCGACTGGTTGGCTTG	5	-	988	1110
ENSDARG00000011027	ENSDART00000027831	8	7	7	CACGCCGACTGGTTGGCTTGGCC	5	-	985	1110
ENSDARG00000011027	ENSDART00000027831	8	8	8	ACCATCACACAGATGAGGAAGAA	5	-	1096	1110
ENSDARG00000011027	ENSDART00000027831	8	8	8	CCCACCATCACACAGATGAGGAA	5	-	1099	1110
ENSDARG00000011027	ENSDART00000027831	8	8	8	TCCCCACCATCACACAGATGAGGAA	7	-	1099	1110
ENSDARG00000011027	ENSDART00000067689	8	1	1	CCCTGCGACTGAAGAGCTTGAGTT	6	-	63	2088
ENSDARG00000011027	ENSDART00000067689	8	1	1	ACCCTCATCTTGGATGGCTGGTCT	6	-	88	2088
ENSDARG00000011027	ENSDART00000067689	8	2	2	GAATCCAGAGTGTACGATGTGGGC	6	-	120	2088
ENSDARG00000011027	ENSDART00000067689	8	4	4	TTCTCCATCTTATCAGGTTGAGCC	6	-	441	2088
ENSDARG00000011027	ENSDART00000067689	8	4	4	TTAAGCCACTTGAGCGTCGGTGTA	6	-	528	2088
ENSDARG00000011027	ENSDART00000067689	8	5	5	GTTTTCCACCAGGCAGGTGTAGTTT	7	-	654	2088
ENSDARG00000011027	ENSDART00000067689	8	5	5	GTTTTCCACCAGGCAGGTGTAGTT	6	-	655	2088
ENSDARG00000011027	ENSDART00000067689	8	6	6	GTTTCAGCCACTGAATGTGAGGCT	6	-	827	2088
ENSDARG00000011027	ENSDART00000067689	8	6	6	CACCACTGCGGTACGGTTTGCAGGC	7	-	759	2088
ENSDARG00000011027	ENSDART00000067689	8	6	6	TTCAGCCACTGAATGTGAGGCTGAG	7	-	824	2088
ENSDARG00000011027	ENSDART00000067689	8	9	9	GCAGGCTCCCAGCAGGTTGATGAT	6	-	1258	2088
ENSDARG00000011027	ENSDART00000067689	8	10	10	TACTCCATCCCTGGTGGACGCCGTA	7	-	1352	2088
ENSDARG00000011027	ENSDART00000067689	8	10	10	AGCAGCAAACTCCACGATGACGTA	6	-	1300	2088
ENSDARG00000011027	ENSDART00000067689	8	12	12	GTACACGTCACTTTGATGGGTGT	5	-	1658	2088
ENSDARG00000011027	ENSDART00000067689	8	13	13	ACCCCAAAAGACCAGCTGAGGTC	5	-	1669	2088
ENSDARG00000011027	ENSDART00000067689	8	13	13	CTCCTCGACGGGGACGCCGGGGTA	6	-	1729	2088
ENSDARG00000011027	ENSDART00000067689	8	13	13	CACCCCAAAAGACCAGCTGAGGTC	6	-	1669	2088
ENSDARG00000011027	ENSDART00000067689	8	15	15	GTCTTCACCTGAGGAGCAGGTGGA	6	-	1984	2088
ENSDARG00000011027	ENSDART00000067689	8	15	15	AAAGGCCACTCCTCGGTTGGGAT	5	-	2066	2088
ENSDARG00000011027	ENSDART00000067689	8	15	15	GGCCACTCCTCGGTTGGGATGGG	5	-	2063	2088
ENSDARG00000011027	ENSDART00000067689	8	15	15	GGCCACTCCTCGGTTGGGATGGGGT	7	-	2061	2088
ENSDARG00000011027	ENSDART00000074774	8	5	5	TTCTCCATCTTATCAGGTTGAGCC	6	-	330	2322
[truncated: 12,933 more rows]
