# Supplementary material for: Rapid Mutation of Endogenous Zebrafish Genes Using Zinc Finger Nucleases Made by Oligomerized Pool ENgineering (OPEN)
Source: PLoS One. 2009 Feb 9;4(2):e4348. doi: 10.1371/journal.pone.0004348 (PMC2634973; doi:10.1371/journal.pone.0004348)
Supplement: Table S11 — Potential OPEN ZFN target sites in gene transcripts encoded on zebrafish chromosome 11. Data presented as described in the legend to Table S1. (1.75 MB XLS) [file pone.0004348.s011.xls]

## Sheet: Chromosome11
Gene ID	Transcript ID	Chromosome Number	Exon Number	Coding Exon Number	TargetSite	ZFN Spacer Length	Strand	ZFN Cleavage Site	Coding Sequence Length
ENSDARG00000000472	ENSDART00000000486	11	2	2	CGCTCCAGCCCTGCTGCTGTTTAC	6	+	187	3120
ENSDARG00000000472	ENSDART00000000486	11	3	3	GCACTACACACAGGTTGCAGGAAAC	7	+	255	3120
ENSDARG00000000472	ENSDART00000000486	11	3	3	CACTACACACAGGTTGCAGGAAAC	6	+	256	3120
ENSDARG00000000472	ENSDART00000000486	11	5	5	AACTTCATCCAGCCAGAAGCGGGC	6	+	520	3120
ENSDARG00000000472	ENSDART00000000486	11	6	6	AACCGCACAGCTGGAATGCTTTGCC	7	+	768	3120
ENSDARG00000000472	ENSDART00000000486	11	7	7	CTAAAATCCGCTGGAGGAAGGTGGA	7	+	809	3120
ENSDARG00000000472	ENSDART00000000486	11	7	7	TTCCTAAAATCCGCTGGAGGAAGGT	7	+	806	3120
ENSDARG00000000472	ENSDART00000000486	11	7	7	AAAATCCGCTGGAGGAAGGTGGA	5	+	811	3120
ENSDARG00000000472	ENSDART00000000486	11	10	10	CAAACCCACTCTCTTCTGGAGCC	5	+	1347	3120
ENSDARG00000000472	ENSDART00000000486	11	10	10	CCCAAACCCACTCTCTTCTGGAGCC	7	+	1345	3120
ENSDARG00000000472	ENSDART00000000486	11	10	10	AACCCACTCTCTTCTGGAGCCGCG	6	+	1349	3120
ENSDARG00000000472	ENSDART00000000486	11	13	13	GGCCTCGGCCAAGCTGGTGGTGAG	6	+	1800	3120
ENSDARG00000000472	ENSDART00000000486	11	15	15	GCCAGCAACATCTTGGGCAGCGGAG	7	+	2068	3120
ENSDARG00000000472	ENSDART00000000486	11	15	15	AGCAACATCTTGGGCAGCGGAGAAC	7	+	2071	3120
ENSDARG00000000472	ENSDART00000000486	11	18	18	GTTTGCTTCATTAATGGTTTTGTT	6	+	2215	3120
ENSDARG00000000472	ENSDART00000000486	11	20	20	CCCTTCAGCCAGATTGCTGTAGTA	6	+	2404	3120
ENSDARG00000000472	ENSDART00000000486	11	20	20	GCCTACAACAAGAAAGGAGAAGGG	6	+	2380	3120
ENSDARG00000000472	ENSDART00000000486	11	20	20	ACACTCTGCGGAGGAGGGTGAGGGT	7	+	2427	3120
ENSDARG00000000472	ENSDART00000000486	11	20	20	ACACTCTGCGGAGGAGGGTGAGGG	6	+	2427	3120
ENSDARG00000000472	ENSDART00000000486	11	21	21	TGCCACTGCTTTGACTGCATTTGAG	7	+	2472	3120
ENSDARG00000000472	ENSDART00000103792	11	1	1	CGCTCCAGCCCTGCTGCTGTTTAC	6	+	109	2928
ENSDARG00000000472	ENSDART00000103792	11	2	2	GCACTACACACAGGTTGCAGGAAAC	7	+	177	2928
ENSDARG00000000472	ENSDART00000103792	11	2	2	CACTACACACAGGTTGCAGGAAAC	6	+	178	2928
ENSDARG00000000472	ENSDART00000103792	11	4	4	AACTTCATCCAGCCAGAAGCGGGC	6	+	469	2928
ENSDARG00000000472	ENSDART00000103792	11	5	5	AACCGCACAGCTGGAATGCTTTGCC	7	+	717	2928
ENSDARG00000000472	ENSDART00000103792	11	6	6	TTCCTAAAATCCGCTGGAGGAAGGT	7	+	755	2928
ENSDARG00000000472	ENSDART00000103792	11	6	6	CTAAAATCCGCTGGAGGAAGGTGGA	7	+	758	2928
ENSDARG00000000472	ENSDART00000103792	11	6	6	AAAATCCGCTGGAGGAAGGTGGA	5	+	760	2928
ENSDARG00000000472	ENSDART00000103792	11	9	9	AACCCACTCTCTTCTGGAGCCGCG	6	+	1274	2928
ENSDARG00000000472	ENSDART00000103792	11	9	9	CCCAAACCCACTCTCTTCTGGAGCC	7	+	1270	2928
ENSDARG00000000472	ENSDART00000103792	11	9	9	CAAACCCACTCTCTTCTGGAGCC	5	+	1272	2928
ENSDARG00000000472	ENSDART00000103792	11	12	12	GGCCTCGGCCAAGCTGGTGGTGAG	6	+	1725	2928
ENSDARG00000000472	ENSDART00000103792	11	14	14	AGCAACATCTTGGGCAGCGGAGAAC	7	+	1996	2928
ENSDARG00000000472	ENSDART00000103792	11	14	14	GCCAGCAACATCTTGGGCAGCGGAG	7	+	1993	2928
ENSDARG00000000472	ENSDART00000103792	11	17	17	ACACTCTGCGGAGGAGGGTGAGGG	6	+	2343	2928
ENSDARG00000000472	ENSDART00000103792	11	17	17	CCCTTCAGCCAGATTGCTGTAGTA	6	+	2320	2928
ENSDARG00000000472	ENSDART00000103792	11	17	17	GCCTACAACAAGAAAGGAGAAGGG	6	+	2296	2928
ENSDARG00000000472	ENSDART00000103792	11	17	17	ACACTCTGCGGAGGAGGGTGAGGGT	7	+	2343	2928
ENSDARG00000000472	ENSDART00000103792	11	18	18	TGCCACTGCTTTGACTGCATTTGAG	7	+	2388	2928
ENSDARG00000000472	ENSDART00000103800	11	2	2	CGCTCCAGCCCTGCTGCTGTTTAC	6	+	193	3123
ENSDARG00000000472	ENSDART00000103800	11	3	3	GCACTACACACAGGTTGCAGGAAAC	7	+	261	3123
ENSDARG00000000472	ENSDART00000103800	11	3	3	CACTACACACAGGTTGCAGGAAAC	6	+	262	3123
ENSDARG00000000472	ENSDART00000103800	11	5	5	AACTTCATCCAGCCAGAAGCGGGC	6	+	526	3123
ENSDARG00000000472	ENSDART00000103800	11	6	6	AACCGCACAGCTGGAATGCTTTGCC	7	+	774	3123
ENSDARG00000000472	ENSDART00000103800	11	7	7	TTCCTAAAATCCGCTGGAGGAAGGT	7	+	812	3123
ENSDARG00000000472	ENSDART00000103800	11	7	7	AAAATCCGCTGGAGGAAGGTGGA	5	+	817	3123
ENSDARG00000000472	ENSDART00000103800	11	7	7	CTAAAATCCGCTGGAGGAAGGTGGA	7	+	815	3123
ENSDARG00000000472	ENSDART00000103800	11	10	10	AACCCACTCTCTTCTGGAGCCGCG	6	+	1355	3123
ENSDARG00000000472	ENSDART00000103800	11	10	10	CCCAAACCCACTCTCTTCTGGAGCC	7	+	1351	3123
ENSDARG00000000472	ENSDART00000103800	11	10	10	CAAACCCACTCTCTTCTGGAGCC	5	+	1353	3123
ENSDARG00000000472	ENSDART00000103800	11	13	13	GGCCTCGGCCAAGCTGGTGGTGAG	6	+	1806	3123
ENSDARG00000000472	ENSDART00000103800	11	15	15	AGCAACATCTTGGGCAGCGGAGAAC	7	+	2077	3123
ENSDARG00000000472	ENSDART00000103800	11	15	15	GCCAGCAACATCTTGGGCAGCGGAG	7	+	2074	3123
ENSDARG00000000472	ENSDART00000103800	11	18	18	GCCTACAACAAGAAAGGAGAAGGG	6	+	2383	3123
ENSDARG00000000472	ENSDART00000103800	11	18	18	CCCTTCAGCCAGATTGCTGTAGTA	6	+	2407	3123
ENSDARG00000000472	ENSDART00000103800	11	18	18	ACACTCTGCGGAGGAGGGTGAGGGT	7	+	2430	3123
ENSDARG00000000472	ENSDART00000103800	11	18	18	ACACTCTGCGGAGGAGGGTGAGGG	6	+	2430	3123
ENSDARG00000000472	ENSDART00000103800	11	19	19	TGCCACTGCTTTGACTGCATTTGAG	7	+	2475	3123
ENSDARG00000001782	ENSDART00000011183	11	5	5	CAATCCTTCTCAAATGTGAGAAC	5	-	528	1185
ENSDARG00000001782	ENSDART00000011183	11	8	8	TGCCCACCAGTCAACAGCCTTGTTG	7	-	789	1185
ENSDARG00000001885	ENSDART00000005715	11	3	3	GTCTTCTTCATGCAGGATGTTGTA	6	-	370	576
ENSDARG00000001897	ENSDART00000004780	11	1	1	TCCATCTGCGGTTATAAGGTGAG	5	+	94	2952
ENSDARG00000001897	ENSDART00000004780	11	1	1	GTCTTCTGCTCTTGTTTTGTTTTT	6	+	38	2952
ENSDARG00000001897	ENSDART00000004780	11	2	2	TTCCACACACACATGATGATGTC	5	+	155	2952
ENSDARG00000001897	ENSDART00000004780	11	2	2	GTTCCACACACACATGATGATGTC	6	+	154	2952
ENSDARG00000001897	ENSDART00000004780	11	3	3	AGAACCAGAACACACGCCGCATTG	6	+	344	2952
ENSDARG00000001897	ENSDART00000004780	11	6	6	GACGACCCAGATCTAGAAGACTAC	6	+	790	2952
ENSDARG00000001897	ENSDART00000004780	11	8	8	AGAGACTTAGCAACAGCCGTCTAC	6	+	1157	2952
ENSDARG00000001897	ENSDART00000004780	11	8	8	TTACTAGCCGACCAGCGCTGAAGTT	7	+	1127	2952
ENSDARG00000001897	ENSDART00000004780	11	9	9	ACATGCAACCAGCTGGAGGTGCT	5	+	1183	2952
ENSDARG00000001897	ENSDART00000004780	11	9	9	ATCTACATCAGGACCTTTTGGTGAA	7	+	1218	2952
ENSDARG00000001897	ENSDART00000004780	11	9	9	GCAACCAGCTGGAGGTGCTTGGAG	6	+	1187	2952
ENSDARG00000001897	ENSDART00000004780	11	14	14	GACTCACGCAAAACTTCTTTTGGT	6	+	1856	2952
ENSDARG00000001897	ENSDART00000004780	11	14	14	GACAGCACCACTGGTCTTTTGAG	5	+	1798	2952
ENSDARG00000001897	ENSDART00000004780	11	14	14	GACAGCACCACTGGTCTTTTGAGCA	7	+	1798	2952
ENSDARG00000001897	ENSDART00000004780	11	15	15	GTACAATGCAAGTGCTGGGAATAA	6	+	1878	2952
ENSDARG00000001897	ENSDART00000004780	11	15	15	AGAGCCATCAGCCATCTGGCGCT	5	+	1907	2952
ENSDARG00000001897	ENSDART00000004780	11	17	17	ATCGGCCCACATGGGATTTGAAGCA	7	+	2231	2952
ENSDARG00000001897	ENSDART00000004780	11	19	19	CCCTCAGTCCTCCAGAAGCAGCC	5	+	2498	2952
ENSDARG00000001897	ENSDART00000004780	11	19	19	TCCCTCAGCTGCACAGGAGACTTC	6	+	2384	2952
ENSDARG00000001897	ENSDART00000004780	11	20	20	AGCAAAACACACTCGCAGCCTGT	5	+	2725	2952
ENSDARG00000001897	ENSDART00000004780	11	20	20	GCCCCCTGCTGTTCATCTGCTGAC	6	+	2637	2952
ENSDARG00000001897	ENSDART00000004780	11	21	21	GTTTTCTACTCTGCAGGTGCTGGG	6	+	2769	2952
ENSDARG00000001897	ENSDART00000103281	11	1	1	TCCATCTGCGGTTATAAGGTGAG	5	+	94	2952
ENSDARG00000001897	ENSDART00000103281	11	1	1	GTCTTCTGCTCTTGTTTTGTTTTT	6	+	38	2952
ENSDARG00000001897	ENSDART00000103281	11	2	2	TTCCACACACACATGATGATGTC	5	+	155	2952
ENSDARG00000001897	ENSDART00000103281	11	2	2	GTTCCACACACACATGATGATGTC	6	+	154	2952
ENSDARG00000001897	ENSDART00000103281	11	3	3	AGAACCAGAACACACGCCGCATTG	6	+	344	2952
ENSDARG00000001897	ENSDART00000103281	11	6	6	GACGACCCAGATCTAGAAGACTAC	6	+	790	2952
ENSDARG00000001897	ENSDART00000103281	11	8	8	AGAGACTTAGCAACAGCCGTCTAC	6	+	1157	2952
ENSDARG00000001897	ENSDART00000103281	11	8	8	TTACTAGCCGACCAGCGCTGAAGTT	7	+	1127	2952
ENSDARG00000001897	ENSDART00000103281	11	9	9	GCAACCAGCTGGAGGTGCTTGGAG	6	+	1187	2952
ENSDARG00000001897	ENSDART00000103281	11	9	9	ATCTACATCAGGACCTTTTGGTGAA	7	+	1218	2952
ENSDARG00000001897	ENSDART00000103281	11	9	9	ACATGCAACCAGCTGGAGGTGCT	5	+	1183	2952
ENSDARG00000001897	ENSDART00000103281	11	14	14	GACAGCACCACTGGTCTTTTGAGCA	7	+	1798	2952
ENSDARG00000001897	ENSDART00000103281	11	14	14	GACAGCACCACTGGTCTTTTGAG	5	+	1798	2952
ENSDARG00000001897	ENSDART00000103281	11	14	14	GACTCACGCAAAACTTCTTTTGGT	6	+	1856	2952
ENSDARG00000001897	ENSDART00000103281	11	15	15	GTACAATGCAAGTGCTGGGAATAA	6	+	1878	2952
ENSDARG00000001897	ENSDART00000103281	11	15	15	AGAGCCATCAGCCATCTGGCGCT	5	+	1907	2952
ENSDARG00000001897	ENSDART00000103281	11	17	17	ATCGGCCCACATGGGATTTGAAGCA	7	+	2231	2952
ENSDARG00000001897	ENSDART00000103281	11	20	20	CCCTCAGTCCTCCAGAAGCAGCC	5	+	2504	2952
ENSDARG00000001897	ENSDART00000103281	11	20	20	TCCCTCAGCTGCACAGGAGACTTC	6	+	2390	2952
ENSDARG00000001897	ENSDART00000103281	11	21	21	GCCCCCTGCTGTTCATCTGCTGAC	6	+	2643	2952
ENSDARG00000001897	ENSDART00000103281	11	21	21	AGCAAAACACACTCGCAGCCTGT	5	+	2731	2952
ENSDARG00000001897	ENSDART00000103281	11	22	22	GTTTTCTACTCTGCAGGTGCTGGG	6	+	2775	2952
ENSDARG00000001969	ENSDART00000024292	11	1	1	TCCAACTCCACATCGAGGGGGTC	5	-	181	1089
ENSDARG00000001969	ENSDART00000024292	11	3	3	TCCTTCAGCACCTGGTTCTGCTTCT	7	-	380	1089
ENSDARG00000001969	ENSDART00000024292	11	3	3	AACAGCTTCACCTGCTTTTGCATGC	7	-	350	1089
ENSDARG00000001969	ENSDART00000024292	11	3	3	TGCAACAGCTTCACCTGCTTTTGCA	7	-	353	1089
ENSDARG00000001969	ENSDART00000024292	11	5	5	AGCTCAGCCGTCCGCTGGAGTTTAG	7	-	752	1089
ENSDARG00000001969	ENSDART00000024292	11	5	5	AACACCTTATCTGTGTGCTGAGTAA	7	-	692	1089
ENSDARG00000001969	ENSDART00000024292	11	5	5	AACACCTTATCTGTGTGCTGAGTA	6	-	693	1089
ENSDARG00000001969	ENSDART00000024292	11	6	6	TTCTCCATCTCCTGTCTGAAGGT	5	-	964	1089
ENSDARG00000001969	ENSDART00000024292	11	6	6	TTCATCAGCTCACATTTGTGTCT	5	-	844	1089
ENSDARG00000001969	ENSDART00000024292	11	6	6	TCCATCTCCTGTCTGAAGGTGGT	5	-	961	1089
ENSDARG00000001969	ENSDART00000024292	11	7	7	TACCTCTTCTGCCATTTGCAGTA	5	-	1064	1089
ENSDARG00000001969	ENSDART00000024292	11	7	7	CTCTTCTGCCATTTGCAGTAGAG	5	-	1061	1089
ENSDARG00000001969	ENSDART00000104141	11	1	1	TCCAACTCCACATCGAGGGGGTC	5	-	181	1089
ENSDARG00000001969	ENSDART00000104141	11	3	3	TGCAACAGCTTCACCTGCTTTTGCA	7	-	353	1089
ENSDARG00000001969	ENSDART00000104141	11	3	3	TCCTTCAGCACCTGGTTCTGCTTCT	7	-	380	1089
ENSDARG00000001969	ENSDART00000104141	11	3	3	AACAGCTTCACCTGCTTTTGCATGC	7	-	350	1089
ENSDARG00000001969	ENSDART00000104141	11	5	5	AGCTCAGCCGTCCGCTGGAGTTTAG	7	-	752	1089
ENSDARG00000001969	ENSDART00000104141	11	5	5	AACACCTTATCTGTGTGCTGAGTAA	7	-	692	1089
ENSDARG00000001969	ENSDART00000104141	11	5	5	AACACCTTATCTGTGTGCTGAGTA	6	-	693	1089
ENSDARG00000001969	ENSDART00000104141	11	6	6	TCCATCTCCTGTCTGAAGGTGGT	5	-	961	1089
ENSDARG00000001969	ENSDART00000104141	11	6	6	TTCATCAGCTCACATTTGTGTCT	5	-	844	1089
ENSDARG00000001969	ENSDART00000104141	11	6	6	TTCTCCATCTCCTGTCTGAAGGT	5	-	964	1089
ENSDARG00000001969	ENSDART00000104141	11	7	7	CTCTTCTGCCATTTGCAGTAGAG	5	-	1061	1089
ENSDARG00000001969	ENSDART00000104141	11	7	7	TACCTCTTCTGCCATTTGCAGTA	5	-	1064	1089
ENSDARG00000001969	ENSDART00000104142	11	2	1	TCCAACTCCACATCGAGGGGGTC	5	-	181	1404
ENSDARG00000001969	ENSDART00000104142	11	4	3	AACAGCTTCACCTGCTTTTGCATGC	7	-	350	1404
ENSDARG00000001969	ENSDART00000104142	11	4	3	TGCAACAGCTTCACCTGCTTTTGCA	7	-	353	1404
ENSDARG00000001969	ENSDART00000104142	11	4	3	TCCTTCAGCACCTGGTTCTGCTTCT	7	-	380	1404
ENSDARG00000001969	ENSDART00000104142	11	6	5	AACACCTTATCTGTGTGCTGAGTAA	7	-	692	1404
ENSDARG00000001969	ENSDART00000104142	11	6	5	AGCTCAGCCGTCCGCTGGAGTTTAG	7	-	752	1404
ENSDARG00000001969	ENSDART00000104142	11	6	5	AACACCTTATCTGTGTGCTGAGTA	6	-	693	1404
ENSDARG00000001969	ENSDART00000104142	11	7	6	TTCATCAGCTCACATTTGTGTCT	5	-	844	1404
ENSDARG00000001969	ENSDART00000104142	11	7	6	TCCATCTCCTGTCTGAAGGTGGT	5	-	961	1404
ENSDARG00000001969	ENSDART00000104142	11	7	6	TTCTCCATCTCCTGTCTGAAGGT	5	-	964	1404
ENSDARG00000001969	ENSDART00000104142	11	8	7	TACCTCTTCTGCCATTTGCAGTA	5	-	1064	1404
ENSDARG00000001969	ENSDART00000104142	11	8	7	CTCTTCTGCCATTTGCAGTAGAG	5	-	1061	1404
ENSDARG00000001969	ENSDART00000104142	11	9	8	GGCTCAGTCGTCAATAAGTTGTG	5	-	1397	1404
ENSDARG00000001969	ENSDART00000104142	11	9	8	ACCCTCTTCCTCAGGATCTTTTGCA	7	-	1209	1404
ENSDARG00000001969	ENSDART00000104142	11	9	8	TTAGACAGCTCCTCCGGCTGGGGGT	7	-	1247	1404
ENSDARG00000001969	ENSDART00000104142	11	9	8	TTAGACAGCTCCTCCGGCTGGGGG	6	-	1248	1404
ENSDARG00000001969	ENSDART00000104142	11	9	8	CTCTTCCTCAGGATCTTTTGCAGGG	7	-	1206	1404
ENSDARG00000001969	ENSDART00000104142	11	9	8	TCCTCCGGCTGGGGGTCTGGAGGT	6	-	1239	1404
ENSDARG00000001969	ENSDART00000104142	11	9	8	GACAGCTCCTCCGGCTGGGGGTCT	6	-	1245	1404
ENSDARG00000001969	ENSDART00000104143	11	2	2	TCCAACTCCACATCGAGGGGGTC	5	-	244	1467
ENSDARG00000001969	ENSDART00000104143	11	4	4	TCCTTCAGCACCTGGTTCTGCTTCT	7	-	443	1467
ENSDARG00000001969	ENSDART00000104143	11	4	4	AACAGCTTCACCTGCTTTTGCATGC	7	-	413	1467
ENSDARG00000001969	ENSDART00000104143	11	4	4	TGCAACAGCTTCACCTGCTTTTGCA	7	-	416	1467
ENSDARG00000001969	ENSDART00000104143	11	6	6	AACACCTTATCTGTGTGCTGAGTA	6	-	756	1467
ENSDARG00000001969	ENSDART00000104143	11	6	6	AACACCTTATCTGTGTGCTGAGTAA	7	-	755	1467
ENSDARG00000001969	ENSDART00000104143	11	6	6	AGCTCAGCCGTCCGCTGGAGTTTAG	7	-	815	1467
ENSDARG00000001969	ENSDART00000104143	11	7	7	TTCATCAGCTCACATTTGTGTCT	5	-	907	1467
ENSDARG00000001969	ENSDART00000104143	11	7	7	TCCATCTCCTGTCTGAAGGTGGT	5	-	1024	1467
ENSDARG00000001969	ENSDART00000104143	11	7	7	TTCTCCATCTCCTGTCTGAAGGT	5	-	1027	1467
ENSDARG00000001969	ENSDART00000104143	11	8	8	CTCTTCTGCCATTTGCAGTAGAG	5	-	1124	1467
ENSDARG00000001969	ENSDART00000104143	11	8	8	TACCTCTTCTGCCATTTGCAGTA	5	-	1127	1467
ENSDARG00000001969	ENSDART00000104143	11	9	9	TTAGACAGCTCCTCCGGCTGGGGG	6	-	1311	1467
ENSDARG00000001969	ENSDART00000104143	11	9	9	TTAGACAGCTCCTCCGGCTGGGGGT	7	-	1310	1467
ENSDARG00000001969	ENSDART00000104143	11	9	9	TCCTCCGGCTGGGGGTCTGGAGGT	6	-	1302	1467
ENSDARG00000001969	ENSDART00000104143	11	9	9	GGCTCAGTCGTCAATAAGTTGTG	5	-	1460	1467
ENSDARG00000001969	ENSDART00000104143	11	9	9	GACAGCTCCTCCGGCTGGGGGTCT	6	-	1308	1467
ENSDARG00000001969	ENSDART00000104143	11	9	9	CTCTTCCTCAGGATCTTTTGCAGGG	7	-	1269	1467
ENSDARG00000001969	ENSDART00000104143	11	9	9	ACCCTCTTCCTCAGGATCTTTTGCA	7	-	1272	1467
ENSDARG00000002037	ENSDART00000036110	11	1	1	GTCCAACCAGTTCTGCTGAAGCC	5	+	41	1533
ENSDARG00000002037	ENSDART00000036110	11	1	1	GGCTGCAGCAGGAGGAGGCTGGT	5	+	20	1533
ENSDARG00000002037	ENSDART00000036110	11	5	5	CACAAACACAACTCGGGAGAGGAG	6	+	402	1533
ENSDARG00000002037	ENSDART00000036110	11	5	5	ACAAACACAACTCGGGAGAGGAG	5	+	403	1533
ENSDARG00000002037	ENSDART00000036110	11	8	8	CACAACATCCAAGGGCGTATTGGAG	7	+	799	1533
ENSDARG00000002037	ENSDART00000036110	11	8	8	GAACACAACATCCAAGGGCGTATTG	7	+	796	1533
ENSDARG00000002037	ENSDART00000036110	11	9	9	GAACCATCCAGACGGCTGAGGAG	5	+	932	1533
ENSDARG00000002037	ENSDART00000036110	11	9	9	AGAACCATCCAGACGGCTGAGGA	5	+	931	1533
ENSDARG00000002037	ENSDART00000036110	11	9	9	AGAACCATCCAGACGGCTGAGGAG	6	+	931	1533
ENSDARG00000002037	ENSDART00000036110	11	14	14	TTCCCAAACACACCAGACGGGGCA	6	+	1516	1533
ENSDARG00000002037	ENSDART00000036110	11	14	14	TCCCAAACACACCAGACGGGGCA	5	+	1517	1533
ENSDARG00000002037	ENSDART00000036110	11	14	14	CTCCTCTGCTGTTAAGGCGGAATAG	7	+	1388	1533
ENSDARG00000002494	ENSDART00000065928	11	2	2	TACATCGCACCGCAGAAGATGCG	5	+	244	2265
ENSDARG00000002494	ENSDART00000065928	11	2	2	AGATGCGACACACCGGAGGCTCT	5	+	115	2265
ENSDARG00000002494	ENSDART00000065928	11	4	4	GCAGGCCGCAGTCTGTGGGGTGAG	6	+	678	2265
ENSDARG00000002494	ENSDART00000065928	11	5	5	AACGACTCCATGAAGCTGCTGGT	5	+	715	2265
ENSDARG00000002494	ENSDART00000065928	11	9	9	GAAACCAACAGCAGCTTCTGCAGCC	7	+	1318	2265
ENSDARG00000002494	ENSDART00000065928	11	9	9	GTCCTCGGCGGTTTTCTTTGCGGCC	7	+	1223	2265
ENSDARG00000002494	ENSDART00000065928	11	9	9	AGCTTCTGCAGCCGAGGCCGCGGGG	7	+	1330	2265
ENSDARG00000002494	ENSDART00000065928	11	9	9	AGCAGCTTCTGCAGCCGAGGCCGCG	7	+	1327	2265
ENSDARG00000002494	ENSDART00000065928	11	9	9	AACAGCAGCTTCTGCAGCCGAGGCC	7	+	1324	2265
ENSDARG00000002494	ENSDART00000065928	11	9	9	ACCAACAGCAGCTTCTGCAGCCGAG	7	+	1321	2265
ENSDARG00000002494	ENSDART00000065928	11	10	10	GTTTGCAGCGGGCAGGGCGAGTGT	6	+	1468	2265
ENSDARG00000002494	ENSDART00000065928	11	10	10	CGCTTCAGAGGAGAGCTCTGCGGAG	7	+	1576	2265
ENSDARG00000002494	ENSDART00000065928	11	11	11	ATCTGCAGCATACACAGGTTAGTGC	7	+	1807	2265
ENSDARG00000002494	ENSDART00000065928	11	11	11	GACAGCGGCTGGATGGGTGAGTTC	6	+	1636	2265
ENSDARG00000002494	ENSDART00000065928	11	11	11	GACAGCGGCTGGATGGGTGAGTT	5	+	1636	2265
ENSDARG00000002494	ENSDART00000065928	11	19	19	ATCCAAAAATGATGGGTTTTGTTT	6	+	1998	2265
ENSDARG00000002494	ENSDART00000065928	11	19	19	ATCCAAAAATGATGGGTTTTGTT	5	+	1998	2265
ENSDARG00000002494	ENSDART00000065928	11	20	20	GGCCAAAGCCAAATGGCAGTCGGT	6	+	2190	2265
ENSDARG00000002494	ENSDART00000065928	11	20	20	GCCAAAGCCAAATGGCAGTCGGT	5	+	2191	2265
ENSDARG00000002494	ENSDART00000065933	11	2	2	AGATGCGACACACCGGAGGCTCT	5	+	124	2280
ENSDARG00000002494	ENSDART00000065933	11	2	2	TACATCGCACCGCAGAAGATGCG	5	+	253	2280
ENSDARG00000002494	ENSDART00000065933	11	4	4	GCAGGCCGCAGTCTGTGGGGTGAG	6	+	687	2280
ENSDARG00000002494	ENSDART00000065933	11	5	5	AACGACTCCATGAAGCTGCTGGT	5	+	724	2280
ENSDARG00000002494	ENSDART00000065933	11	9	9	ACCAACAGCAGCTTCTGCAGCCGAG	7	+	1330	2280
ENSDARG00000002494	ENSDART00000065933	11	9	9	AACAGCAGCTTCTGCAGCCGAGGCC	7	+	1333	2280
ENSDARG00000002494	ENSDART00000065933	11	9	9	AGCAGCTTCTGCAGCCGAGGCCGCG	7	+	1336	2280
ENSDARG00000002494	ENSDART00000065933	11	9	9	AGCTTCTGCAGCCGAGGCCGCGGGG	7	+	1339	2280
ENSDARG00000002494	ENSDART00000065933	11	9	9	GTCCTCGGCGGTTTTCTTTGCGGCC	7	+	1232	2280
ENSDARG00000002494	ENSDART00000065933	11	9	9	GAAACCAACAGCAGCTTCTGCAGCC	7	+	1327	2280
ENSDARG00000002494	ENSDART00000065933	11	10	10	GTTTGCAGCGGGCAGGGCGAGTGT	6	+	1474	2280
ENSDARG00000002494	ENSDART00000065933	11	10	10	CGCTTCAGAGGAGAGCTCTGCGGAG	7	+	1582	2280
ENSDARG00000002494	ENSDART00000065933	11	11	11	GACAGCGGCTGGATGGGTGAGTTC	6	+	1642	2280
ENSDARG00000002494	ENSDART00000065933	11	11	11	ATCTGCAGCATACACAGGTTAGTGC	7	+	1813	2280
ENSDARG00000002494	ENSDART00000065933	11	11	11	GACAGCGGCTGGATGGGTGAGTT	5	+	1642	2280
ENSDARG00000002494	ENSDART00000065933	11	12	12	AGAGCCGTCAGATGAGTGTGCTGTA	7	+	1860	2280
ENSDARG00000002494	ENSDART00000065933	11	13	13	TTACAAAGCGAGGAGAGTTGCCTGC	7	+	1957	2280
ENSDARG00000002494	ENSDART00000065933	11	14	14	GGCCAAAGCCAAATGGCAGTCGGT	6	+	2202	2280
ENSDARG00000002494	ENSDART00000065933	11	14	14	GCCAAAGCCAAATGGCAGTCGGT	5	+	2203	2280
ENSDARG00000002494	ENSDART00000065933	11	15	15	TACAAAAGCACAGGGCAGCAGAA	5	+	2275	2280
ENSDARG00000002494	ENSDART00000104326	11	2	2	AGATGCGACACACCGGAGGCTCT	5	+	115	2223
ENSDARG00000002494	ENSDART00000104326	11	2	2	TACATCGCACCGCAGAAGATGCG	5	+	244	2223
ENSDARG00000002494	ENSDART00000104326	11	4	4	GCAGGCCGCAGTCTGTGGGGTGAG	6	+	678	2223
ENSDARG00000002494	ENSDART00000104326	11	5	5	AACGACTCCATGAAGCTGCTGGT	5	+	715	2223
ENSDARG00000002494	ENSDART00000104326	11	9	9	GTCCTCGGCGGTTTTCTTTGCGGCC	7	+	1223	2223
ENSDARG00000002494	ENSDART00000104326	11	9	9	GAAACCAACAGCAGCTTCTGCAGCC	7	+	1318	2223
ENSDARG00000002494	ENSDART00000104326	11	9	9	AGCTTCTGCAGCCGAGGCCGCGGGG	7	+	1330	2223
ENSDARG00000002494	ENSDART00000104326	11	9	9	ACCAACAGCAGCTTCTGCAGCCGAG	7	+	1321	2223
ENSDARG00000002494	ENSDART00000104326	11	9	9	AACAGCAGCTTCTGCAGCCGAGGCC	7	+	1324	2223
ENSDARG00000002494	ENSDART00000104326	11	9	9	AGCAGCTTCTGCAGCCGAGGCCGCG	7	+	1327	2223
ENSDARG00000002494	ENSDART00000104326	11	10	10	GTTTGCAGCGGGCAGGGCGAGTGT	6	+	1468	2223
ENSDARG00000002494	ENSDART00000104326	11	10	10	CGCTTCAGAGGAGAGCTCTGCGGAG	7	+	1576	2223
ENSDARG00000002494	ENSDART00000104326	11	11	11	GACAGCGGCTGGATGGGTGAGTT	5	+	1636	2223
ENSDARG00000002494	ENSDART00000104326	11	11	11	ATCTGCAGCATACACAGGTTAGTGC	7	+	1807	2223
ENSDARG00000002494	ENSDART00000104326	11	11	11	GACAGCGGCTGGATGGGTGAGTTC	6	+	1636	2223
ENSDARG00000002494	ENSDART00000104326	11	12	12	AGAGCCGTCAGATGAGTGTGCTGTA	7	+	1854	2223
ENSDARG00000002494	ENSDART00000104326	11	13	13	TTACAAAGCGAGGAGAGTTGCCTGC	7	+	1951	2223
ENSDARG00000002494	ENSDART00000104326	11	14	14	ATCCAAAAATGATGGGTTTTGTTT	6	+	1992	2223
ENSDARG00000002494	ENSDART00000104326	11	14	14	ATCCAAAAATGATGGGTTTTGTT	5	+	1992	2223
ENSDARG00000002494	ENSDART00000104326	11	15	15	GGCCAAAGCCAAATGGCAGTCGGT	6	+	2184	2223
ENSDARG00000002494	ENSDART00000104326	11	15	15	GCCAAAGCCAAATGGCAGTCGGT	5	+	2185	2223
ENSDARG00000002552	ENSDART00000027532	11	1	1	GAAAAATGCCATTACCGACGACTAC	7	+	117	1146
ENSDARG00000002552	ENSDART00000027532	11	1	1	ATCCACCTCAGTTCATGCTGGGAA	6	+	74	1146
ENSDARG00000002552	ENSDART00000027532	11	1	1	AACGCCAACAGTCCGCCGAAGTT	5	+	19	1146
ENSDARG00000002552	ENSDART00000027532	11	2	2	CCCAAAAGCTAGACGAGAGGTGGAA	7	+	246	1146
ENSDARG00000002552	ENSDART00000027532	11	2	2	GCCTTCTTATTGTAATGGAGTGGTG	7	+	350	1146
ENSDARG00000002552	ENSDART00000027532	11	7	7	GTTTCCAAATCCTGAGTGGTCGGA	6	+	807	1146
ENSDARG00000002552	ENSDART00000027532	11	9	9	CACCCCTACACACCAGCCGTGTTT	6	+	953	1146
ENSDARG00000002552	ENSDART00000027532	11	9	9	CCCTACACACCAGCCGTGTTTTGAA	7	+	956	1146
ENSDARG00000002552	ENSDART00000027532	11	9	9	CTACACACCAGCCGTGTTTTGAA	5	+	958	1146
ENSDARG00000002552	ENSDART00000027532	11	10	10	AGACTCGACCAATCCGCTGCTGAT	6	+	1080	1146
ENSDARG00000002607	ENSDART00000027254	11	2	2	TTCTCCAAAGAACTGCTGACGCC	5	+	196	2880
ENSDARG00000002607	ENSDART00000027254	11	2	2	GGCCTCTGCCTTTAATAAGTTTGC	6	+	168	2880
ENSDARG00000002607	ENSDART00000027254	11	5	5	GGCCAAGCAGTATGGTATGGTGC	5	+	387	2880
ENSDARG00000002607	ENSDART00000027254	11	5	5	TCCAGCTGCAGATGTGTGAAGTA	5	+	467	2880
ENSDARG00000002607	ENSDART00000027254	11	7	7	GGCTGCTACAGAGAAGCTGAAGCA	6	+	591	2880
ENSDARG00000002607	ENSDART00000027254	11	7	7	TGCTACAGAGAAGCTGAAGCAGTA	6	+	594	2880
ENSDARG00000002607	ENSDART00000027254	11	16	16	AAACAAAGCGCAAATATCTGCAGGA	7	+	1508	2880
ENSDARG00000002607	ENSDART00000027254	11	16	16	GTTTGCACAGCGCAGCGGCGGCT	5	+	1479	2880
ENSDARG00000002607	ENSDART00000027254	11	20	20	GACTCAAGCACTCGCTGTGTGAGGA	7	+	1871	2880
ENSDARG00000002607	ENSDART00000027254	11	22	22	TTCTCATGCTGGAGGAGGAAGTG	5	+	2070	2880
ENSDARG00000002607	ENSDART00000027254	11	22	22	CTCTTCTTCTCATGCTGGAGGAGGA	7	+	2064	2880
ENSDARG00000002607	ENSDART00000027254	11	27	27	GCCCCCAGACCAATGTGTGAGTC	5	+	2583	2880
ENSDARG00000002607	ENSDART00000103507	11	2	2	TTCTCCAAAGAACTGCTGACGCC	5	+	196	2949
ENSDARG00000002607	ENSDART00000103507	11	2	2	GGCCTCTGCCTTTAATAAGTTTGC	6	+	168	2949
ENSDARG00000002607	ENSDART00000103507	11	5	5	TCCAGCTGCAGATGTGTGAAGTA	5	+	467	2949
ENSDARG00000002607	ENSDART00000103507	11	5	5	GGCCAAGCAGTATGGTATGGTGC	5	+	387	2949
ENSDARG00000002607	ENSDART00000103507	11	7	7	TGCTACAGAGAAGCTGAAGCAGTA	6	+	594	2949
ENSDARG00000002607	ENSDART00000103507	11	7	7	GGCTGCTACAGAGAAGCTGAAGCA	6	+	591	2949
ENSDARG00000002607	ENSDART00000103507	11	16	16	GTTTGCACAGCGCAGCGGCGGCT	5	+	1479	2949
ENSDARG00000002607	ENSDART00000103507	11	16	16	AAACAAAGCGCAAATATCTGCAGGA	7	+	1508	2949
ENSDARG00000002607	ENSDART00000103507	11	20	20	GACTCAAGCACTCGCTGTGTGAGGA	7	+	1865	2949
ENSDARG00000002607	ENSDART00000103507	11	25	25	CTCTTCTTCTCATGCTGGAGGAGGA	7	+	2199	2949
ENSDARG00000002607	ENSDART00000103507	11	25	25	TTCTCATGCTGGAGGAGGAAGTG	5	+	2205	2949
ENSDARG00000002607	ENSDART00000103507	11	29	29	AGACTCACCTTTCCAGAAGTGTGT	6	+	2673	2949
ENSDARG00000002690	ENSDART00000026421	11	3	3	GGCAAAGTCAAGTATCTTATTTGTG	7	+	334	435
ENSDARG00000002750	ENSDART00000018743	11	2	1	AAAGGCCTCCTAACAGACGAGGAA	6	+	17	2898
ENSDARG00000002750	ENSDART00000018743	11	3	2	AGCCACCGCTATGACGAGTGGTTC	6	+	160	2898
ENSDARG00000002750	ENSDART00000018743	11	3	2	TTAGTCCACTATCGGCAGTGGAG	5	+	139	2898
ENSDARG00000002750	ENSDART00000018743	11	4	3	TTATCCGGCAAAAGTTCTGGCTGT	6	+	315	2898
ENSDARG00000002750	ENSDART00000018743	11	6	5	AACAAAAGAAGGAGGAAGTCGAA	5	+	827	2898
ENSDARG00000002750	ENSDART00000018743	11	6	5	CAAAAAAGCACGGAGGCAGCGGAT	6	+	870	2898
ENSDARG00000002750	ENSDART00000018743	11	6	5	CACAACAAAAGAAGGAGGAAGTC	5	+	824	2898
ENSDARG00000002750	ENSDART00000018743	11	6	5	GACAAAAAAGCACGGAGGCAGCG	5	+	868	2898
ENSDARG00000002750	ENSDART00000018743	11	9	8	CTCCAAAAAAAACAAGACTGATTC	6	+	966	2898
ENSDARG00000002750	ENSDART00000018743	11	9	8	TCCAAAAAAAACAAGACTGATTC	5	+	967	2898
ENSDARG00000002750	ENSDART00000018743	11	12	11	GCACACAGAATTACCAGCAGTGGCC	7	+	1481	2898
ENSDARG00000002750	ENSDART00000018743	11	14	13	GTTATCACCTCACCTCTTAGCTGTA	7	+	1771	2898
ENSDARG00000002750	ENSDART00000018743	11	14	13	CACCTCACCTCTTAGCTGTAGTT	5	+	1776	2898
ENSDARG00000002750	ENSDART00000018743	11	16	15	AGCCACCCATCAGCTGTTAGGGGAC	7	+	2103	2898
ENSDARG00000002750	ENSDART00000018743	11	16	15	CCCATCAGCTGTTAGGGGACGTC	5	+	2108	2898
ENSDARG00000002750	ENSDART00000018743	11	16	15	GCAGCCACCCATCAGCTGTTAGGGG	7	+	2101	2898
ENSDARG00000002750	ENSDART00000018743	11	16	15	AGCCACCCATCAGCTGTTAGGGG	5	+	2103	2898
ENSDARG00000002750	ENSDART00000018743	11	17	16	GACTCATCCAGATCTTAAGTTGTG	6	+	2190	2898
ENSDARG00000002750	ENSDART00000018743	11	17	16	AGACTCATCCAGATCTTAAGTTGTG	7	+	2189	2898
ENSDARG00000002750	ENSDART00000018743	11	21	20	CACAGCATCAAACAGTTGCTGAG	5	+	2842	2898
ENSDARG00000002750	ENSDART00000018743	11	21	20	CACAGCATCAAACAGTTGCTGAGTG	7	+	2842	2898
ENSDARG00000002750	ENSDART00000103676	11	2	1	AAAGGCCTCCTAACAGACGAGGAA	6	+	17	1632
ENSDARG00000002750	ENSDART00000103676	11	3	2	TTAGTCCACTATCGGCAGTGGAG	5	+	139	1632
ENSDARG00000002750	ENSDART00000103676	11	3	2	AGCCACCGCTATGACGAGTGGTTC	6	+	160	1632
ENSDARG00000002750	ENSDART00000103676	11	4	3	TTATCCGGCAAAAGTTCTGGCTGT	6	+	315	1632
ENSDARG00000002750	ENSDART00000103676	11	6	5	CAAAAAAGCACGGAGGCAGCGGAT	6	+	870	1632
ENSDARG00000002750	ENSDART00000103676	11	6	5	CACAACAAAAGAAGGAGGAAGTC	5	+	824	1632
ENSDARG00000002750	ENSDART00000103676	11	6	5	GACAAAAAAGCACGGAGGCAGCG	5	+	868	1632
ENSDARG00000002750	ENSDART00000103676	11	6	5	AACAAAAGAAGGAGGAAGTCGAA	5	+	827	1632
ENSDARG00000002750	ENSDART00000103676	11	7	6	TCCAAAAAAAACAAGACTGATTC	5	+	931	1632
ENSDARG00000002750	ENSDART00000103676	11	7	6	CTCCAAAAAAAACAAGACTGATTC	6	+	930	1632
ENSDARG00000002750	ENSDART00000103676	11	10	9	GCACACAGAATTACCAGCAGTGGCC	7	+	1439	1632
ENSDARG00000002897	ENSDART00000008133	11	3	3	AGACACGACTGCTCTGCTGGCTAA	6	+	312	1125
ENSDARG00000002897	ENSDART00000008133	11	3	3	CGCTGCGTCTCTCCTGTCTGAAGTG	7	+	357	1125
ENSDARG00000002897	ENSDART00000008133	11	3	3	TCCATCAGCCCTGCCGACGTGGGC	6	+	433	1125
ENSDARG00000002897	ENSDART00000008133	11	5	5	TCCTCATGCCATTCTGCGGGCTCT	6	+	927	1125
ENSDARG00000002897	ENSDART00000008133	11	5	5	TACAAAATCCTGTGTGTTTTGCA	5	+	844	1125
ENSDARG00000002897	ENSDART00000008133	11	5	5	ACAAAATCCTGTGTGTTTTGCAGGG	7	+	845	1125
ENSDARG00000002897	ENSDART00000056058	11	2	2	AGACACGACTGCTCTGCTGGCTAA	6	+	87	933
ENSDARG00000002897	ENSDART00000056058	11	2	2	CGCTGCGTCTCTCCTGTCTGAAGTG	7	+	132	933
ENSDARG00000002897	ENSDART00000056058	11	2	2	TCCATCAGCCCTGCCGACGTGGGC	6	+	208	933
ENSDARG00000002897	ENSDART00000056058	11	4	4	TCCTCATGCCATTCTGCGGGCTCT	6	+	702	933
ENSDARG00000002897	ENSDART00000056058	11	4	4	TACAAAATCCTGTGTGTTTTGCA	5	+	619	933
ENSDARG00000002897	ENSDART00000056058	11	4	4	ACAAAATCCTGTGTGTTTTGCAGGG	7	+	620	933
ENSDARG00000002898	ENSDART00000009863	11	1	1	ACAGACAGAATGGCGGACGCAGAA	6	+	1	2166
ENSDARG00000002898	ENSDART00000009863	11	1	1	GTTGACTTCATTCAGCTGCAGGA	5	+	52	2166
ENSDARG00000002898	ENSDART00000009863	11	2	2	TGCACCACAGGTTTGGAGATGTA	5	+	143	2166
ENSDARG00000002898	ENSDART00000009863	11	3	3	TTCCTCAGCAGTTATCTGGAGGT	5	+	193	2166
ENSDARG00000002898	ENSDART00000009863	11	3	3	GCACACAGACGCAGCCGGGTTTGCT	7	+	165	2166
ENSDARG00000002898	ENSDART00000009863	11	5	5	GACACCTTCAAACTGTATGATAA	5	+	367	2166
ENSDARG00000002898	ENSDART00000009863	11	7	7	TCCCTCTGCTGGTGCTGCTGGGGT	6	+	581	2166
ENSDARG00000002898	ENSDART00000009863	11	7	7	TCCCTCTGCTGGTGCTGCTGGGGTT	7	+	581	2166
ENSDARG00000002898	ENSDART00000009863	11	7	7	ACATCCCTCTGCTGGTGCTGCTGGG	7	+	578	2166
ENSDARG00000002898	ENSDART00000009863	11	7	7	AACAACATCCCTCTGCTGGTGCT	5	+	574	2166
ENSDARG00000002898	ENSDART00000009863	11	9	9	CAAAGCAGAGATTGGGGTGAGAG	5	+	801	2166
ENSDARG00000002898	ENSDART00000009863	11	9	9	ACCGTCCACAGCAGCTGCGCCAAC	6	+	739	2166
ENSDARG00000002898	ENSDART00000009863	11	9	9	TCCAAAGCAGAGATTGGGGTGAGAG	7	+	799	2166
ENSDARG00000002898	ENSDART00000009863	11	9	9	TCCAAAGCAGAGATTGGGGTGAG	5	+	799	2166
ENSDARG00000002898	ENSDART00000009863	11	9	9	AAATACACCGTCCACAGCAGCTGCG	7	+	733	2166
ENSDARG00000002898	ENSDART00000009863	11	13	13	CAAATCCTCTGTTGGTGTTTGTA	5	+	1121	2166
ENSDARG00000002898	ENSDART00000009863	11	13	13	CACAAATCCTCTGTTGGTGTTTGTA	7	+	1119	2166
ENSDARG00000002898	ENSDART00000009863	11	13	13	CACAAATCCTCTGTTGGTGTTTGT	6	+	1119	2166
ENSDARG00000002898	ENSDART00000009863	11	13	13	AAATCCAAAGAGTGGTGGAAAAC	5	+	1143	2166
ENSDARG00000002898	ENSDART00000009863	11	13	13	ACACAAATCCTCTGTTGGTGTTTGT	7	+	1118	2166
ENSDARG00000002898	ENSDART00000009863	11	22	22	CTCTCCCCATGCAGGTTGACGGA	5	+	2051	2166
ENSDARG00000002898	ENSDART00000009863	11	22	22	TCCCCATGCAGGTTGACGGAGAG	5	+	2054	2166
ENSDARG00000002898	ENSDART00000009863	11	23	23	TCCGGCTGCTAAATCAGTGGGATGC	7	+	2142	2166
ENSDARG00000002898	ENSDART00000009863	11	23	23	GGCTGCTAAATCAGTGGGATGCT	5	+	2145	2166
ENSDARG00000002912	ENSDART00000026258	11	2	2	CACCACGCAATGGAGAAGATGGA	5	+	112	420
ENSDARG00000002912	ENSDART00000026258	11	2	2	GGCTCACCACGCAATGGAGAAGAT	6	+	108	420
ENSDARG00000002912	ENSDART00000026258	11	3	3	CCCTCCTTCCGTGCCTGTTTTGGGA	7	+	247	420
ENSDARG00000002912	ENSDART00000026258	11	3	3	CCCTCCTTCCGTGCCTGTTTTGGG	6	+	247	420
ENSDARG00000002912	ENSDART00000082761	11	3	1	GTTCCAGCCGACGTGGAGCTGAT	5	+	79	1134
ENSDARG00000002912	ENSDART00000082761	11	3	1	GAATGCCACGTTCCAGCCGACGTG	6	+	70	1134
ENSDARG00000002912	ENSDART00000082761	11	4	2	CACCACGCAATGGAGAAGATGGA	5	+	238	1134
ENSDARG00000002912	ENSDART00000082761	11	4	2	GGCTCACCACGCAATGGAGAAGAT	6	+	234	1134
ENSDARG00000002912	ENSDART00000082761	11	5	3	CCCTCCTTCCGTGCCTGTTTTGGG	6	+	373	1134
ENSDARG00000002912	ENSDART00000082761	11	5	3	CCCTCCTTCCGTGCCTGTTTTGGGA	7	+	373	1134
ENSDARG00000002912	ENSDART00000082761	11	7	5	TACCTCACAATCGTCTGTGTGTTG	6	+	730	1134
ENSDARG00000002912	ENSDART00000082761	11	7	5	ACAGGCCCACCAGAGCAGGTGAG	5	+	806	1134
ENSDARG00000002912	ENSDART00000082761	11	7	5	GGCCCACCAGAGCAGGTGAGTAG	5	+	809	1134
ENSDARG00000002912	ENSDART00000082761	11	7	5	ATCTACCTCACAATCGTCTGTGTGT	7	+	727	1134
ENSDARG00000002912	ENSDART00000082761	11	8	6	CACTTCACCATCGAGGAGGGTTTC	6	+	868	1134
ENSDARG00000002912	ENSDART00000082761	11	8	6	CACTTCACCATCGAGGAGGGTTT	5	+	868	1134
ENSDARG00000003165	ENSDART00000027666	11	2	1	CCCTCCTCCTCCCCCCGCAGGTAAC	7	-	74	1212
ENSDARG00000003165	ENSDART00000027666	11	2	1	CTCCTCCTCCCCCCGCAGGTAAC	5	-	74	1212
ENSDARG00000003165	ENSDART00000027666	11	2	1	CTCACCTGCAGGTGTAGTTGAGGTT	7	-	259	1212
ENSDARG00000003165	ENSDART00000027666	11	4	3	GTTGGCGCCTTGGAGCTGCTGGC	5	-	566	1212
ENSDARG00000003165	ENSDART00000027666	11	4	3	GCCAGCAGAGGGGCCGTGTGCAGGG	7	-	767	1212
ENSDARG00000003165	ENSDART00000027666	11	4	3	TGCAGCTGCCAGCAGAGGGGCCGTG	7	-	774	1212
ENSDARG00000003165	ENSDART00000027666	11	4	3	TGCTCCTACCATGGAGGCTGGGCT	6	-	415	1212
ENSDARG00000003165	ENSDART00000027666	11	4	3	CTCCTACCATGGAGGCTGGGCTGAT	7	-	412	1212
ENSDARG00000003165	ENSDART00000027666	11	4	3	GGCAGCGCCGACTGAGCTGCATTC	6	-	744	1212
ENSDARG00000003165	ENSDART00000027666	11	4	3	CCCTGCAGCTGCCAGCAGAGGGG	5	-	779	1212
ENSDARG00000003165	ENSDART00000027666	11	4	3	CAATGCCCATCATGGAGCTGTTGGC	7	-	583	1212
ENSDARG00000003165	ENSDART00000027666	11	4	3	ACCTGCTCCTACCATGGAGGCTGGG	7	-	417	1212
ENSDARG00000003165	ENSDART00000027666	11	5	4	CAACCAGCCGCATGAAGAAGAGTTG	7	-	1117	1212
ENSDARG00000003165	ENSDART00000027666	11	5	4	ACCAGCCGCATGAAGAAGAGTTG	5	-	1117	1212
ENSDARG00000003165	ENSDART00000027666	11	5	4	ACATACGGCCAGCTGATGGAGCT	5	-	1189	1212
ENSDARG00000003165	ENSDART00000027666	11	5	4	TGCCAACCAGCCGCATGAAGAAGAG	7	-	1120	1212
ENSDARG00000003165	ENSDART00000027666	11	5	4	ACAGCCCGCATGCATCTGCAGGA	5	-	942	1212
ENSDARG00000003169	ENSDART00000044423	11	1	1	CTCCGCGCCACCGAGCAGCTGCA	5	-	98	3741
ENSDARG00000003169	ENSDART00000044423	11	1	1	TTAACCTTATAGGTCCTTTGCAGTT	7	-	268	3741
ENSDARG00000003169	ENSDART00000044423	11	2	2	AGCTCATAATCGGCGGAGGATTT	5	-	358	3741
ENSDARG00000003169	ENSDART00000044423	11	2	2	CAAGGCACAGCGTGGCGGTAGAG	5	-	403	3741
ENSDARG00000003169	ENSDART00000044423	11	2	2	AGCTCATAATCGGCGGAGGATTTC	6	-	357	3741
ENSDARG00000003169	ENSDART00000044423	11	3	3	CTCTCCTTCACGAGGGGGGCGAG	5	-	431	3741
ENSDARG00000003169	ENSDART00000044423	11	3	3	CACCTCTCCTTCACGAGGGGGGC	5	-	434	3741
ENSDARG00000003169	ENSDART00000044423	11	4	4	GCACTATTCCAGCATTTTGCATCT	6	-	674	3741
ENSDARG00000003169	ENSDART00000044423	11	4	4	GTCATCATCCTCAGTCTCTGTAGGC	7	-	696	3741
ENSDARG00000003169	ENSDART00000044423	11	5	5	TCCTCCTCCGTTGGGTAGGCGGG	5	-	877	3741
ENSDARG00000003169	ENSDART00000044423	11	5	5	GTCCTCCTCCGTTGGGTAGGCGGG	6	-	877	3741
ENSDARG00000003169	ENSDART00000044423	11	5	5	GTTGACGCCGAGGTGTTGTTGAGCC	7	-	821	3741
ENSDARG00000003169	ENSDART00000044423	11	5	5	GTTGACGCCGAGGTGTTGTTGAG	5	-	823	3741
ENSDARG00000003169	ENSDART00000044423	11	11	11	GTCCCCTTCAGTTCTGCAGGGTTC	6	-	1371	3741
ENSDARG00000003169	ENSDART00000044423	11	11	11	ACCCACGCCTGCTCTTCTTGAGCT	6	-	1409	3741
ENSDARG00000003169	ENSDART00000044423	11	11	11	AACCCACGCCTGCTCTTCTTGAGCT	7	-	1409	3741
ENSDARG00000003169	ENSDART00000044423	11	11	11	TCCTCCTACTACAGTGAAGCCGAA	6	-	1432	3741
ENSDARG00000003169	ENSDART00000044423	11	12	12	GCCTCCTCCAGACGGGCTGTCTGC	6	-	1978	3741
ENSDARG00000003169	ENSDART00000044423	11	12	12	AGCTACTGCCTCCAGCTGTAGTT	5	-	1782	3741
ENSDARG00000003169	ENSDART00000044423	11	12	12	AAAGTCACCACATCACTGGGATAAC	7	-	1874	3741
ENSDARG00000003169	ENSDART00000044423	11	12	12	GGCCTCCTCCAGACGGGCTGTCTGC	7	-	1978	3741
ENSDARG00000003169	ENSDART00000044423	11	16	16	CTCATCTCCTGATCGCAGACGCC	5	-	2585	3741
ENSDARG00000003169	ENSDART00000044423	11	17	17	CTCCACTACCGATACCGCTGGTGGA	7	-	2872	3741
ENSDARG00000003169	ENSDART00000044423	11	17	17	CTCCACATCATAGGGCAGGATTG	5	-	2933	3741
ENSDARG00000003169	ENSDART00000044423	11	18	18	GTTTTCCACAGCGGTCGGCTGGGCT	7	-	3088	3741
ENSDARG00000003169	ENSDART00000044423	11	20	20	CTCAAAAGACTCCTGTTTTGGTTTG	7	-	3342	3741
ENSDARG00000003169	ENSDART00000044423	11	20	20	AAAGACTCCTGTTTTGGTTTGGT	5	-	3340	3741
ENSDARG00000003169	ENSDART00000044423	11	20	20	AAAGACTCCTGTTTTGGTTTGGTG	6	-	3339	3741
ENSDARG00000003169	ENSDART00000044423	11	20	20	AAAGACTCCTGTTTTGGTTTGGTGT	7	-	3338	3741
ENSDARG00000003169	ENSDART00000044423	11	20	20	AACTCAAAAGACTCCTGTTTTGGT	6	-	3345	3741
ENSDARG00000003169	ENSDART00000044423	11	20	20	AACTCAAAAGACTCCTGTTTTGGTT	7	-	3344	3741
ENSDARG00000003169	ENSDART00000044423	11	20	20	CTCAAAAGACTCCTGTTTTGGTT	5	-	3344	3741
ENSDARG00000003169	ENSDART00000044423	11	20	20	GAACTCAAAAGACTCCTGTTTTGGT	7	-	3345	3741
ENSDARG00000003169	ENSDART00000044423	11	21	21	CTCGACCCCCTCTAAGGCTGAAAC	6	-	3470	3741
ENSDARG00000003169	ENSDART00000044423	11	22	22	CCCTCCTTAGGACCAGGTGGACTTT	7	-	3655	3741
ENSDARG00000003169	ENSDART00000103968	11	1	1	CTCTCCTTCACGAGGGGGGCGAG	5	-	14	462
ENSDARG00000003169	ENSDART00000103968	11	1	1	CACCTCTCCTTCACGAGGGGGGC	5	-	17	462
ENSDARG00000003169	ENSDART00000103968	11	2	2	GCACTATTCCAGCATTTTGCATCT	6	-	257	462
ENSDARG00000003169	ENSDART00000103968	11	2	2	GTCATCATCCTCAGTCTCTGTAGGC	7	-	279	462
ENSDARG00000003169	ENSDART00000103968	11	3	3	CCCTCCGCCACAGCCAGATGGCGCT	7	-	352	462
ENSDARG00000003169	ENSDART00000103968	11	3	3	CTCCGCCACAGCCAGATGGCGCT	5	-	352	462
ENSDARG00000003169	ENSDART00000103969	11	2	2	CACCTCTCCTTCACGAGGGGGGC	5	-	38	3348
ENSDARG00000003169	ENSDART00000103969	11	2	2	CTCTCCTTCACGAGGGGGGCGAG	5	-	35	3348
ENSDARG00000003169	ENSDART00000103969	11	3	3	GTCATCATCCTCAGTCTCTGTAGGC	7	-	300	3348
ENSDARG00000003169	ENSDART00000103969	11	3	3	GCACTATTCCAGCATTTTGCATCT	6	-	278	3348
ENSDARG00000003169	ENSDART00000103969	11	4	4	GTCCTCCTCCGTTGGGTAGGCGGG	6	-	481	3348
ENSDARG00000003169	ENSDART00000103969	11	4	4	GTTGACGCCGAGGTGTTGTTGAG	5	-	427	3348
ENSDARG00000003169	ENSDART00000103969	11	4	4	TCCTCCTCCGTTGGGTAGGCGGG	5	-	481	3348
ENSDARG00000003169	ENSDART00000103969	11	4	4	GTTGACGCCGAGGTGTTGTTGAGCC	7	-	425	3348
ENSDARG00000003169	ENSDART00000103969	11	10	10	TCCTCCTACTACAGTGAAGCCGAA	6	-	1039	3348
ENSDARG00000003169	ENSDART00000103969	11	10	10	GTCCCCTTCAGTTCTGCAGGGTTC	6	-	978	3348
ENSDARG00000003169	ENSDART00000103969	11	10	10	ACCCACGCCTGCTCTTCTTGAGCT	6	-	1016	3348
ENSDARG00000003169	ENSDART00000103969	11	10	10	AACCCACGCCTGCTCTTCTTGAGCT	7	-	1016	3348
ENSDARG00000003169	ENSDART00000103969	11	11	11	AGCTACTGCCTCCAGCTGTAGTT	5	-	1389	3348
ENSDARG00000003169	ENSDART00000103969	11	11	11	GGCCTCCTCCAGACGGGCTGTCTGC	7	-	1585	3348
ENSDARG00000003169	ENSDART00000103969	11	11	11	GCCTCCTCCAGACGGGCTGTCTGC	6	-	1585	3348
ENSDARG00000003169	ENSDART00000103969	11	11	11	AAAGTCACCACATCACTGGGATAAC	7	-	1481	3348
ENSDARG00000003169	ENSDART00000103969	11	15	15	CTCATCTCCTGATCGCAGACGCC	5	-	2192	3348
ENSDARG00000003169	ENSDART00000103969	11	16	16	CTCCACTACCGATACCGCTGGTGGA	7	-	2479	3348
ENSDARG00000003169	ENSDART00000103969	11	16	16	CTCCACATCATAGGGCAGGATTG	5	-	2540	3348
ENSDARG00000003169	ENSDART00000103969	11	17	17	GTTTTCCACAGCGGTCGGCTGGGCT	7	-	2695	3348
ENSDARG00000003169	ENSDART00000103969	11	19	19	AAAGACTCCTGTTTTGGTTTGGTGT	7	-	2945	3348
ENSDARG00000003169	ENSDART00000103969	11	19	19	AACTCAAAAGACTCCTGTTTTGGT	6	-	2952	3348
ENSDARG00000003169	ENSDART00000103969	11	19	19	AACTCAAAAGACTCCTGTTTTGGTT	7	-	2951	3348
ENSDARG00000003169	ENSDART00000103969	11	19	19	AAAGACTCCTGTTTTGGTTTGGT	5	-	2947	3348
ENSDARG00000003169	ENSDART00000103969	11	19	19	CTCAAAAGACTCCTGTTTTGGTT	5	-	2951	3348
ENSDARG00000003169	ENSDART00000103969	11	19	19	CTCAAAAGACTCCTGTTTTGGTTTG	7	-	2949	3348
ENSDARG00000003169	ENSDART00000103969	11	19	19	GAACTCAAAAGACTCCTGTTTTGGT	7	-	2952	3348
ENSDARG00000003169	ENSDART00000103969	11	19	19	AAAGACTCCTGTTTTGGTTTGGTG	6	-	2946	3348
ENSDARG00000003169	ENSDART00000103969	11	20	20	CTCGACCCCCTCTAAGGCTGAAAC	6	-	3077	3348
ENSDARG00000003169	ENSDART00000103969	11	21	21	CCCTCCTTAGGACCAGGTGGACTTT	7	-	3262	3348
ENSDARG00000003526	ENSDART00000020655	11	3	2	GAAAAAGCCTTCCTTCTGGTGAG	5	-	54	723
ENSDARG00000003526	ENSDART00000020655	11	3	2	GAAAAAGCCTTCCTTCTGGTGAGAA	7	-	52	723
ENSDARG00000003526	ENSDART00000020655	11	4	3	AACTCCCTCTGATGTCTGAATGC	5	-	125	723
ENSDARG00000003526	ENSDART00000020655	11	4	3	CAAGACAAACTCCCTCTGATGTC	5	-	132	723
ENSDARG00000003526	ENSDART00000020655	11	7	6	AGCGACACCAAAAGGACGGCTCT	5	-	407	723
ENSDARG00000003526	ENSDART00000020655	11	8	7	GCCTTCAGATGCTGAGCCGATTGC	6	-	514	723
ENSDARG00000003526	ENSDART00000020655	11	10	9	TCCTCCAGCTCTTCTTTTGTGTAC	6	-	693	723
ENSDARG00000003526	ENSDART00000020655	11	10	9	GACATCCTCCAGCTCTTCTTTTGTG	7	-	696	723
ENSDARG00000003526	ENSDART00000020655	11	10	9	ACATCCTCCAGCTCTTCTTTTGTG	6	-	696	723
ENSDARG00000003632	ENSDART00000023323	11	1	1	GACAGCAGACATGGAAGACGCCGCT	7	+	14	474
ENSDARG00000003632	ENSDART00000023323	11	2	2	ATCATCACAGCTGTGCTGGCTGT	5	+	256	474
ENSDARG00000003632	ENSDART00000023323	11	3	3	TGCTGCAGCGGGATTAGTGTTGTTC	7	+	448	474
ENSDARG00000003687	ENSDART00000066016	11	3	3	TGCCCAACATATCCAGTGGTGAGTA	7	+	614	699
ENSDARG00000003687	ENSDART00000103979	11	4	4	TGCCCAACATATCCAGTGGTGAGTA	7	+	632	753
ENSDARG00000003877	ENSDART00000045971	11	1	1	AGAGCCTTCTTCGTTGTAGTGGCG	6	-	34	1335
ENSDARG00000003877	ENSDART00000045971	11	1	1	GCCTTCTTCGTTGTAGTGGCGTGC	6	-	31	1335
ENSDARG00000003877	ENSDART00000045971	11	2	2	ACATACTAATTTTTAGCTTGGGTG	6	-	149	1335
ENSDARG00000003877	ENSDART00000045971	11	2	2	CTCGTCGTCATCCGGCGGGGGTC	5	-	119	1335
ENSDARG00000003877	ENSDART00000045971	11	3	3	GCCGTCCACGCTTGTCGGTGTAGTT	7	-	250	1335
ENSDARG00000003877	ENSDART00000045971	11	3	3	GACGCCGTCCACGCTTGTCGGTGTA	7	-	253	1335
ENSDARG00000003877	ENSDART00000045971	11	3	3	AGCTCAGCACGGGACGGGAGACGGA	7	-	293	1335
ENSDARG00000003877	ENSDART00000045971	11	4	4	TTACACAGCTCATCTCTGATGCG	5	-	859	1335
ENSDARG00000003877	ENSDART00000045971	11	4	4	TTCTCCTTCTCCACGTCGCTGTG	5	-	934	1335
ENSDARG00000003877	ENSDART00000045971	11	4	4	TTCTTCTCCTCCTCTCTCTTGAGTT	7	-	992	1335
ENSDARG00000003877	ENSDART00000045971	11	4	4	TCCTTCTCCACGTCGCTGTGCAGAT	7	-	929	1335
ENSDARG00000003877	ENSDART00000045971	11	4	4	TCCTCATACTCTTTAGGCAGCTTCT	7	-	962	1335
ENSDARG00000003877	ENSDART00000045971	11	4	4	CTCCTCCTCTCTCTTGAGTTTGTC	6	-	988	1335
ENSDARG00000003877	ENSDART00000045971	11	4	4	CTCCACGTCGCTGTGCAGATGTT	5	-	926	1335
ENSDARG00000003877	ENSDART00000045971	11	8	8	CGCAGCATCAGGTCTCGCAGTCGCC	7	-	1286	1335
ENSDARG00000003974	ENSDART00000015021	11	5	2	TTCAGCTTCTGTCGGGAGGAGAT	5	+	130	1176
ENSDARG00000003974	ENSDART00000015021	11	6	3	GAACCCAAAGGGTCTGGATGACGAG	7	+	222	1176
ENSDARG00000003974	ENSDART00000015021	11	7	4	AGCTCACTCTGTTCTGTGAGGTA	5	+	470	1176
ENSDARG00000003974	ENSDART00000015021	11	7	4	AGAGACTTCTTGCTGGATGAAGCA	6	+	424	1176
ENSDARG00000003974	ENSDART00000015021	11	8	5	AAATCCATCCTGGCAGGTGAGTTC	6	+	652	1176
ENSDARG00000003974	ENSDART00000015021	11	8	5	GCACAAATCCATCCTGGCAGGTGAG	7	+	648	1176
ENSDARG00000003974	ENSDART00000015021	11	8	5	CACAAATCCATCCTGGCAGGTGAG	6	+	649	1176
ENSDARG00000003974	ENSDART00000015021	11	9	6	GAACACAAAATGGAGGAGAGTAA	5	+	697	1176
ENSDARG00000003974	ENSDART00000015021	11	10	7	GCCGACAACCTGTTAGCTGCCGCA	6	+	817	1176
ENSDARG00000003974	ENSDART00000015021	11	13	10	CCCATCCTCACTTAGTAGCCGAG	5	+	1094	1176
ENSDARG00000003974	ENSDART00000015021	11	13	10	ATCCCATCCTCACTTAGTAGCCGAG	7	+	1092	1176
ENSDARG00000004060	ENSDART00000026017	11	4	4	GCCTTCACATGCTTGAGTGTGAGTT	7	-	293	1209
ENSDARG00000004060	ENSDART00000026017	11	5	5	TTCTGCAGCCTTTGGCTGTAGGC	5	-	620	1209
ENSDARG00000004060	ENSDART00000026017	11	5	5	TACCAACACTTCTCCAGCATAGGCA	7	-	1001	1209
ENSDARG00000004060	ENSDART00000026017	11	5	5	GCATGCACAGGGGCTGTGGTGGCG	6	-	938	1209
ENSDARG00000004060	ENSDART00000026017	11	5	5	GCATGCACAGGGGCTGTGGTGGC	5	-	939	1209
ENSDARG00000004060	ENSDART00000026017	11	5	5	AGATGCCACTTTTTGAAGGTGCT	5	-	518	1209
ENSDARG00000004282	ENSDART00000005923	11	1	1	GCACACACCGCCAGCCGCCGCTGCT	7	-	46	1287
ENSDARG00000004282	ENSDART00000005923	11	1	1	ACACACCGCCAGCCGCCGCTGCT	5	-	46	1287
ENSDARG00000004282	ENSDART00000005923	11	2	2	GCCTTCTTCTGTCGTAAGCAGTT	5	-	241	1287
ENSDARG00000004282	ENSDART00000005923	11	5	5	TTCGCCACAGGAGAAGACTGAAAC	6	-	495	1287
ENSDARG00000004282	ENSDART00000005923	11	5	5	GTTCGCCACAGGAGAAGACTGAAAC	7	-	495	1287
ENSDARG00000004282	ENSDART00000005923	11	6	6	AGAGGCAGATGTGTGGAGTGAGCC	6	-	636	1287
ENSDARG00000004282	ENSDART00000005923	11	6	6	CACATCCACGATCAGCTGCAGGT	5	-	575	1287
ENSDARG00000004282	ENSDART00000005923	11	7	7	AGACACACCATGAAGGTGCCGTG	5	-	718	1287
ENSDARG00000004282	ENSDART00000005923	11	8	8	TTCTCCATCTGGAAGATGAGTTC	5	-	1258	1287
ENSDARG00000004282	ENSDART00000005923	11	8	8	TCCACCAGCGCGGGGTCGAAGCG	5	-	1198	1287
ENSDARG00000004282	ENSDART00000005923	11	8	8	GTTGGCCACTGCTTTGGTGGACGTC	7	-	969	1287
ENSDARG00000004282	ENSDART00000005923	11	8	8	GGCTCCACCAGCGCGGGGTCGAA	5	-	1201	1287
ENSDARG00000004282	ENSDART00000005923	11	8	8	GGCAGCTCCATGTGCGGGTTGTAG	6	-	1119	1287
ENSDARG00000004282	ENSDART00000005923	11	8	8	AACTTCTCCATCTGGAAGATGAG	5	-	1261	1287
ENSDARG00000004302	ENSDART00000043016	11	1	1	GCCGTCTCCATCGCGTAGCTGAA	5	-	70	1536
ENSDARG00000004302	ENSDART00000043016	11	3	3	CCCCACTTATGATCCAGAGTGGTGT	7	-	326	1536
ENSDARG00000004302	ENSDART00000043016	11	4	4	GGCGGCGGCCAGGGTGATGCTGGT	6	-	592	1536
ENSDARG00000004302	ENSDART00000043016	11	4	4	TGCAGCAGCTCCAGGAGGCGGTGGC	7	-	726	1536
ENSDARG00000004302	ENSDART00000043016	11	4	4	GCCACCCACTATGTAGCCGAAGCC	6	-	502	1536
ENSDARG00000004302	ENSDART00000043016	11	4	4	TGCCACCCACTATGTAGCCGAAGCC	7	-	502	1536
ENSDARG00000004302	ENSDART00000043016	11	4	4	TGCAGCAGCTCCAGGAGGCGGTG	5	-	728	1536
ENSDARG00000004302	ENSDART00000043016	11	5	5	TGCCGCAGCTTCATTCTGCTGCT	5	-	823	1536
ENSDARG00000004302	ENSDART00000043016	11	7	7	GCCCCAGCAGCCCATGCTGACGCC	6	-	1066	1536
ENSDARG00000004302	ENSDART00000043016	11	7	7	TGCCCCAGCAGCCCATGCTGACGCC	7	-	1066	1536
ENSDARG00000004302	ENSDART00000043016	11	9	9	TACACCACACACAGTGAGGAGTAC	6	-	1515	1536
ENSDARG00000004302	ENSDART00000043016	11	9	9	GTACACCACACACAGTGAGGAGTAC	7	-	1515	1536
ENSDARG00000004302	ENSDART00000043016	11	9	9	GCCGTCCTCCGACGAGCCGCAGAA	6	-	1333	1536
ENSDARG00000004302	ENSDART00000043016	11	9	9	CCCCCATCCCACGCCTGGTGCCGTC	7	-	1351	1536
ENSDARG00000004302	ENSDART00000043016	11	9	9	CCCATCCCACGCCTGGTGCCGTC	5	-	1351	1536
ENSDARG00000004302	ENSDART00000043016	11	9	9	ACACCACACACAGTGAGGAGTAC	5	-	1515	1536
ENSDARG00000004302	ENSDART00000045776	11	3	3	CCCCACTTATGATCCAGAGTGGTGT	7	-	224	1302
ENSDARG00000004302	ENSDART00000045776	11	4	4	GCCACCCACTATGTAGCCGAAGCC	6	-	400	1302
ENSDARG00000004302	ENSDART00000045776	11	4	4	TGCCACCCACTATGTAGCCGAAGCC	7	-	400	1302
ENSDARG00000004302	ENSDART00000045776	11	4	4	GGCGGCGGCCAGGGTGATGCTGGT	6	-	490	1302
ENSDARG00000004302	ENSDART00000045776	11	5	5	TGCCGCAGCTTCATTCTGCTGCT	5	-	604	1302
ENSDARG00000004302	ENSDART00000045776	11	10	10	TGCCCCAGCAGCCCATGCTGACGCC	7	-	958	1302
ENSDARG00000004302	ENSDART00000045776	11	10	10	GCCCCAGCAGCCCATGCTGACGCC	6	-	958	1302
ENSDARG00000004302	ENSDART00000045776	11	13	13	GCCGTCCTCCGACGAGCCGCAGAA	6	-	1249	1302
ENSDARG00000004302	ENSDART00000045776	11	13	13	CCCCCATCCCACGCCTGGTGCCGTC	7	-	1267	1302
ENSDARG00000004302	ENSDART00000045776	11	13	13	CCCATCCCACGCCTGGTGCCGTC	5	-	1267	1302
ENSDARG00000004302	ENSDART00000102757	11	2	1	GCCGTCTCCATCGCGTAGCTGAA	5	-	316	414
ENSDARG00000004302	ENSDART00000102757	11	2	1	GTTTCCGGCGCTTCGGGTGCCTCT	6	-	161	414
ENSDARG00000004302	ENSDART00000102757	11	3	2	CTCACCCTCGGGTGGTGGCAGAT	5	-	406	414
ENSDARG00000004302	ENSDART00000102757	11	3	2	GGCTCACCCTCGGGTGGTGGCAGAT	7	-	406	414
ENSDARG00000004302	ENSDART00000102760	11	1	1	GTTTCCGGCGCTTCGGGTGCCTCT	6	-	152	2262
ENSDARG00000004302	ENSDART00000102760	11	1	1	GCCGTCTCCATCGCGTAGCTGAA	5	-	307	2262
ENSDARG00000004302	ENSDART00000102760	11	3	3	CCCCACTTATGATCCAGAGTGGTGT	7	-	563	2262
ENSDARG00000004302	ENSDART00000102760	11	4	4	TGCCACCCACTATGTAGCCGAAGCC	7	-	739	2262
ENSDARG00000004302	ENSDART00000102760	11	4	4	GGCGGCGGCCAGGGTGATGCTGGT	6	-	829	2262
ENSDARG00000004302	ENSDART00000102760	11	4	4	TGCAGCAGCTCCAGGAGGCGGTGGC	7	-	963	2262
ENSDARG00000004302	ENSDART00000102760	11	4	4	GCCACCCACTATGTAGCCGAAGCC	6	-	739	2262
ENSDARG00000004302	ENSDART00000102760	11	4	4	CTCTTCATCCTGATCTGCAGCAGCT	7	-	978	2262
ENSDARG00000004302	ENSDART00000102760	11	4	4	ATCCTCTTCATCCTGATCTGCAGCA	7	-	981	2262
ENSDARG00000004302	ENSDART00000102760	11	4	4	TGCAGCAGCTCCAGGAGGCGGTG	5	-	965	2262
ENSDARG00000004302	ENSDART00000102760	11	5	5	CTCGACTTATAAAGCTGCCGTATTT	7	-	1072	2262
ENSDARG00000004302	ENSDART00000102760	11	6	6	TGCCGCAGCTTCATTCTGCTGCT	5	-	1313	2262
ENSDARG00000004302	ENSDART00000102760	11	8	8	TGCCCCAGCAGCCCATGCTGACGCC	7	-	1738	2262
ENSDARG00000004302	ENSDART00000102760	11	8	8	GCCCCAGCAGCCCATGCTGACGCC	6	-	1738	2262
ENSDARG00000004302	ENSDART00000102760	11	10	10	CCCATCCCACGCCTGGTGCCGTC	5	-	2023	2262
ENSDARG00000004302	ENSDART00000102760	11	10	10	TACACCACACACAGTGAGGAGTAC	6	-	2187	2262
ENSDARG00000004302	ENSDART00000102760	11	10	10	ACACCACACACAGTGAGGAGTAC	5	-	2187	2262
ENSDARG00000004302	ENSDART00000102760	11	10	10	GTACACCACACACAGTGAGGAGTAC	7	-	2187	2262
ENSDARG00000004302	ENSDART00000102760	11	10	10	CCCCCATCCCACGCCTGGTGCCGTC	7	-	2023	2262
ENSDARG00000004302	ENSDART00000102760	11	10	10	GCCGTCCTCCGACGAGCCGCAGAA	6	-	2005	2262
ENSDARG00000004302	ENSDART00000102760	11	10	10	CTCACCCTCGGGTGGTGGCAGAT	5	-	2213	2262
ENSDARG00000004302	ENSDART00000102760	11	10	10	GGCTCACCCTCGGGTGGTGGCAGAT	7	-	2213	2262
ENSDARG00000004302	ENSDART00000102760	11	10	10	GGCTGCGTCTCGCTCTGGGGAGGC	6	-	2235	2262
ENSDARG00000004302	ENSDART00000102760	11	10	10	GGCTGCGTCTCGCTCTGGGGAGGCT	7	-	2234	2262
ENSDARG00000004342	ENSDART00000023116	11	1	1	GTCCTCATCTGCTCGGCGGTGCT	5	-	61	1389
ENSDARG00000004342	ENSDART00000023116	11	1	1	CTCATCTGCTCGGCGGTGCTGCT	5	-	58	1389
ENSDARG00000004342	ENSDART00000023116	11	1	1	GACTCACTCTGGAGGGAAGAGTCT	6	-	118	1389
ENSDARG00000004342	ENSDART00000023116	11	2	2	GCACAAACCTTCAGCGAAGGGGAC	6	-	253	1389
ENSDARG00000004342	ENSDART00000023116	11	2	2	CAAACCTTCAGCGAAGGGGACGAC	6	-	250	1389
ENSDARG00000004342	ENSDART00000023116	11	3	3	GCCAGCAGAGACATAGCCTTGGAC	6	-	285	1389
ENSDARG00000004342	ENSDART00000023116	11	3	3	TCCTGCAACGGCATTGGCCGGAGCC	7	-	306	1389
ENSDARG00000004342	ENSDART00000023116	11	3	3	ACACTCACAGATGGGACGGGGTT	5	-	364	1389
ENSDARG00000004342	ENSDART00000023116	11	6	6	GGCTTCTTCAATCTCTTTATTGGAT	7	-	573	1389
ENSDARG00000004342	ENSDART00000023116	11	8	8	AGCGTCTGCTGCGGTCTCTGGAGTG	7	-	814	1389
ENSDARG00000004342	ENSDART00000023116	11	10	10	TGCTGCGACTCCTTCTGTGCCGTT	6	-	947	1389
ENSDARG00000004342	ENSDART00000023116	11	12	12	CTCTTCATCATAGTCTCTGGTGAC	6	-	1210	1389
ENSDARG00000004342	ENSDART00000023116	11	12	12	AGACTCTCCGCGTCCGGCGTCGTC	6	-	1327	1389
ENSDARG00000004342	ENSDART00000023116	11	12	12	TCCGGCGTCGTCTGCGCTGTCTGC	6	-	1315	1389
ENSDARG00000004632	ENSDART00000024296	11	1	1	TTCTTCACCCACCGGCTGCTGCT	5	-	122	1005
ENSDARG00000004632	ENSDART00000024296	11	1	1	TTCACCCACCGGCTGCTGCTGTT	5	-	119	1005
ENSDARG00000004632	ENSDART00000024296	11	1	1	GTTGTCGACCACACAGATGCCGTG	6	-	358	1005
ENSDARG00000004632	ENSDART00000024296	11	1	1	ACCGGCTGCTGCTGTTTGTCGGC	5	-	112	1005
ENSDARG00000004871	ENSDART00000014018	11	1	1	GAAATCCACTGTGCTGTGAAGTC	5	+	58	843
ENSDARG00000004871	ENSDART00000014018	11	2	2	GCATTCTGCTCCCAGAAGAGGGA	5	+	179	843
ENSDARG00000004871	ENSDART00000014018	11	4	4	TTCACCACCAAGTCAGATGTGGTG	6	+	526	843
ENSDARG00000004871	ENSDART00000014018	11	4	4	TCCTACACAGTAAAGGTTGCAGAT	6	+	391	843
ENSDARG00000004871	ENSDART00000014018	11	4	4	GTTCACCACCAAGTCAGATGTGGTG	7	+	525	843
ENSDARG00000004871	ENSDART00000014018	11	4	4	CACCAAGTCAGATGTGGTGAGAA	5	+	531	843
ENSDARG00000004871	ENSDART00000014018	11	4	4	ATCCTACACAGTAAAGGTTGCAGAT	7	+	390	843
ENSDARG00000004871	ENSDART00000014018	11	6	6	CACTACATCAGCCTGAAGGTGAC	5	+	790	843
ENSDARG00000004871	ENSDART00000014018	11	6	6	AGCTTCTCCACACTTGTGTCTGC	5	+	733	843
ENSDARG00000004871	ENSDART00000014018	11	6	6	TTCTCCACACTTGTGTCTGCAGTG	6	+	736	843
ENSDARG00000004971	ENSDART00000016615	11	2	1	AGCTGCTGCAGGCGGAAGAAGTG	5	+	110	1230
ENSDARG00000004971	ENSDART00000016615	11	3	2	TCCATCTCCAATACTGTGTGTGC	5	+	712	1230
ENSDARG00000004971	ENSDART00000016615	11	3	2	GCCTTCAGAGTTACAGCTGCAGGT	6	+	897	1230
ENSDARG00000004971	ENSDART00000016615	11	3	2	CTCCAATACTGTGTGTGCGTTTGTG	7	+	717	1230
ENSDARG00000004971	ENSDART00000016615	11	3	2	CTCCAATACTGTGTGTGCGTTTGT	6	+	717	1230
ENSDARG00000004971	ENSDART00000016615	11	3	2	CACAAAAAAGCACCACTGCGTCTGC	7	+	617	1230
ENSDARG00000004971	ENSDART00000016615	11	3	2	CAAAAAAGCACCACTGCGTCTGC	5	+	619	1230
ENSDARG00000004971	ENSDART00000016615	11	3	2	AAAGTCAACGGCCAGAAGTTTGT	5	+	229	1230
ENSDARG00000004971	ENSDART00000065613	11	1	1	AGCTGCTGCAGGCGGAAGAAGTG	5	+	110	1122
ENSDARG00000004971	ENSDART00000065613	11	2	2	TCCATCTCCAATACTGTGTGTGC	5	+	712	1122
ENSDARG00000004971	ENSDART00000065613	11	2	2	CACAAAAAAGCACCACTGCGTCTGC	7	+	617	1122
ENSDARG00000004971	ENSDART00000065613	11	2	2	CAAAAAAGCACCACTGCGTCTGC	5	+	619	1122
ENSDARG00000004971	ENSDART00000065613	11	2	2	AAAGTCAACGGCCAGAAGTTTGT	5	+	229	1122
ENSDARG00000004971	ENSDART00000065613	11	7	7	GTTCCCATCTATAATTTAGACGGC	6	+	1111	1122
ENSDARG00000004971	ENSDART00000102850	11	2	1	AGCTGCTGCAGGCGGAAGAAGTG	5	+	110	1332
ENSDARG00000004971	ENSDART00000102850	11	3	2	TCCATCTCCAATACTGTGTGTGC	5	+	712	1332
ENSDARG00000004971	ENSDART00000102850	11	3	2	GCCTTCAGAGTTACAGCTGCAGGT	6	+	897	1332
ENSDARG00000004971	ENSDART00000102850	11	3	2	CTCCAATACTGTGTGTGCGTTTGTG	7	+	717	1332
ENSDARG00000004971	ENSDART00000102850	11	3	2	CTCCAATACTGTGTGTGCGTTTGT	6	+	717	1332
ENSDARG00000004971	ENSDART00000102850	11	3	2	CACAAAAAAGCACCACTGCGTCTGC	7	+	617	1332
ENSDARG00000004971	ENSDART00000102850	11	3	2	CAAAAAAGCACCACTGCGTCTGC	5	+	619	1332
ENSDARG00000004971	ENSDART00000102850	11	3	2	AAAGTCAACGGCCAGAAGTTTGT	5	+	229	1332
ENSDARG00000004971	ENSDART00000102850	11	6	5	GTTCCCATCTATAATTTAGACGGC	6	+	1276	1332
ENSDARG00000005121	ENSDART00000006830	11	1	1	CTACGCACCTCTTTTCTGCGGCGGT	7	-	118	1260
ENSDARG00000005121	ENSDART00000006830	11	1	1	CTACGCACCTCTTTTCTGCGGCG	5	-	120	1260
ENSDARG00000005121	ENSDART00000006830	11	1	1	TTCTGCGGCGGTGATGTTGATTTG	6	-	106	1260
ENSDARG00000005121	ENSDART00000006830	11	6	6	CACGCCTACAGTTATGTGCTGGC	5	-	374	1260
ENSDARG00000005121	ENSDART00000006830	11	10	10	AGAGGCTTCAGACACTCTGGAGGA	6	-	462	1260
ENSDARG00000005121	ENSDART00000006830	11	10	10	AGCTGCGTCTGGGCAGCAGAGGGC	6	-	489	1260
ENSDARG00000005121	ENSDART00000006830	11	10	10	AGCTCAAACTTGCGGCTGGGGAT	5	-	523	1260
ENSDARG00000005121	ENSDART00000006830	11	10	10	GGCAGCAGAGGGCAGCAGAGGCT	5	-	479	1260
ENSDARG00000005121	ENSDART00000006830	11	11	11	AACCACCGCTGGGGCTGTAGGGGTG	7	-	711	1260
ENSDARG00000005121	ENSDART00000006830	11	12	12	GCAATCAGACGCCAGCCGACTGT	5	-	880	1260
ENSDARG00000005121	ENSDART00000006830	11	12	12	CACTGCTGCACTTGGTGGCTGCA	5	-	1048	1260
ENSDARG00000005141	ENSDART00000011170	11	2	1	ACAGACAAATATGATCTGGGGCA	5	+	70	1308
ENSDARG00000005141	ENSDART00000011170	11	4	3	ACCCCAACATTCTCCAGCTGGTGGA	7	+	245	1308
ENSDARG00000005141	ENSDART00000011170	11	4	3	TACTACCTCTTCTTGGAGCTGTA	5	+	292	1308
ENSDARG00000005141	ENSDART00000011170	11	4	3	ACATTCTCCAGCTGGTGGATGTA	5	+	251	1308
ENSDARG00000005141	ENSDART00000011170	11	5	4	TTATCAGACAGGTGATGGAGGCGGT	7	+	383	1308
ENSDARG00000005141	ENSDART00000011170	11	5	4	GTTATCAGACAGGTGATGGAGGC	5	+	382	1308
ENSDARG00000005141	ENSDART00000011170	11	5	4	AGAGCCACAGGTCGGGAGGTGTT	5	+	310	1308
ENSDARG00000005141	ENSDART00000011170	11	5	4	AGAGCCACAGGTCGGGAGGTGTTC	6	+	310	1308
ENSDARG00000005141	ENSDART00000011170	11	7	6	TCCAAAGCCCCAGAGGTTGTTGGA	6	+	565	1308
ENSDARG00000005141	ENSDART00000011170	11	7	6	CTCCAAAGCCCCAGAGGTTGTTGGA	7	+	564	1308
ENSDARG00000005141	ENSDART00000011170	11	8	7	AAAAACCTCTTCCGGAAGATTCT	5	+	709	1308
ENSDARG00000005141	ENSDART00000011170	11	8	7	AAATCCTCCATTTTACGATGAAGCA	7	+	657	1308
ENSDARG00000005141	ENSDART00000011170	11	8	7	ACAAAAACCTCTTCCGGAAGATTCT	7	+	707	1308
ENSDARG00000005141	ENSDART00000011170	11	9	8	GAAGCCATCAACCATGAATGGTAC	6	+	844	1308
ENSDARG00000005141	ENSDART00000011170	11	10	9	TTCGCCAAAGCAAAGTGGAAGGT	5	+	931	1308
ENSDARG00000005141	ENSDART00000011170	11	11	10	AGCAACAGCACCTGCAGCAGAAGCT	7	+	1014	1308
ENSDARG00000005141	ENSDART00000011170	11	11	10	TGCAGCAGAAGCTGCTGCAGCATCT	7	+	1026	1308
ENSDARG00000005141	ENSDART00000011170	11	11	10	AACAGCACCTGCAGCAGAAGCTGCT	7	+	1017	1308
ENSDARG00000005141	ENSDART00000011170	11	11	10	ACCTGCAGCAGAAGCTGCTGCAGCA	7	+	1023	1308
ENSDARG00000005141	ENSDART00000011170	11	11	10	AGCAGCAACAGCACCTGCAGCAGAA	7	+	1011	1308
ENSDARG00000005141	ENSDART00000011170	11	11	10	AGCACCTGCAGCAGAAGCTGCTGCA	7	+	1020	1308
ENSDARG00000005699	ENSDART00000009788	11	1	1	AAACTCACCGATTCCGCTGCAGCT	6	-	51	1461
ENSDARG00000005699	ENSDART00000009788	11	4	4	TTATTCAGCAGTGACTGTGCTGCC	6	-	201	1461
ENSDARG00000005699	ENSDART00000009788	11	4	4	GACTTCAACTTGATTGGTGGTGTTG	7	-	246	1461
ENSDARG00000005699	ENSDART00000009788	11	4	4	GACTTCAACTTGATTGGTGGTGTT	6	-	247	1461
ENSDARG00000005699	ENSDART00000009788	11	8	8	AGCTCATACCTCTGGATGCGAATGC	7	-	803	1461
ENSDARG00000005699	ENSDART00000009788	11	9	9	TTCTCCTCCTTGCTGTTGCAGAT	5	-	970	1461
ENSDARG00000005699	ENSDART00000009788	11	9	9	CTCTTCTTCACGCTTGAGTTTGAT	6	-	916	1461
ENSDARG00000005699	ENSDART00000009788	11	9	9	AACAGCATCTGGCAAGTTTTAGGAA	7	-	824	1461
ENSDARG00000005699	ENSDART00000009788	11	10	10	ACCTGCATCTCTCCACTTAGCAGCG	7	-	1115	1461
ENSDARG00000005699	ENSDART00000009788	11	11	11	GTCTCATTATCAGGGTTGCCGTC	5	-	1276	1461
ENSDARG00000005738	ENSDART00000015610	11	3	3	ATCACCTCCTCATCCTCTGGATTG	6	-	210	900
ENSDARG00000005738	ENSDART00000015610	11	5	5	AGAGCCAGACCTCTTCTGTAGTA	5	-	379	900
ENSDARG00000005738	ENSDART00000015610	11	7	7	GACCAAGTCTTGTAGTGAAGTTGTT	7	-	607	900
ENSDARG00000005738	ENSDART00000015610	11	8	8	GTTCCCTTCTGTAAGGAGCGGAG	5	-	808	900
ENSDARG00000006219	ENSDART00000010319	11	3	3	GTCCCAAACAGTGCGCCTTTTAA	5	+	160	1683
ENSDARG00000006219	ENSDART00000010319	11	4	4	AGCAAAACAAGATCGTGAAGCAGCA	7	+	239	1683
ENSDARG00000006219	ENSDART00000010319	11	8	8	TGCAACAGCAACAGAAGAGGCAGCA	7	+	656	1683
ENSDARG00000006219	ENSDART00000010319	11	8	8	AACAGCAACAGAAGAGGCAGCAGCG	7	+	659	1683
ENSDARG00000006219	ENSDART00000010319	11	8	8	AAACCATGCTAAAAGTTGGCGTC	5	+	785	1683
ENSDARG00000006219	ENSDART00000010319	11	11	11	GGCTCCTGCAGAAAGGTGGCGTTG	6	+	1151	1683
ENSDARG00000006219	ENSDART00000010319	11	11	11	GGCTCCTGCAGAAAGGTGGCGTT	5	+	1151	1683
ENSDARG00000006219	ENSDART00000010319	11	11	11	GACTACAGAAGCTCCTTAGAGTTT	6	+	1102	1683
ENSDARG00000006219	ENSDART00000010319	11	11	11	CTCAACGACTGGACAGGGTGAGTTT	7	+	1204	1683
ENSDARG00000006219	ENSDART00000010319	11	11	11	CTCAACGACTGGACAGGGTGAGTT	6	+	1204	1683
ENSDARG00000006219	ENSDART00000010319	11	11	11	TCCTGCAGAAAGGTGGCGTTGCA	5	+	1154	1683
ENSDARG00000006219	ENSDART00000010319	11	11	11	AGAAGCTCCTTAGAGTTTTTGAC	5	+	1108	1683
ENSDARG00000006219	ENSDART00000010319	11	13	13	TCCCACTGCTGGAGTGCTGGATGT	6	+	1407	1683
ENSDARG00000006219	ENSDART00000010319	11	13	13	TACGACAACCAACACAGATGAGGTA	7	+	1500	1683
ENSDARG00000006219	ENSDART00000010319	11	13	13	TTCCAAACCTCGCGAGCTGCATAA	6	+	1367	1683
ENSDARG00000006219	ENSDART00000010319	11	13	13	GGCAGCAACAACAACAGATGCAGAA	7	+	1461	1683
ENSDARG00000006219	ENSDART00000010319	11	13	13	AGCAACAACAACAGATGCAGAAGAA	7	+	1464	1683
ENSDARG00000006219	ENSDART00000010319	11	13	13	AGATGCAGAAGAAGAGAAGATGGA	6	+	1476	1683
ENSDARG00000006219	ENSDART00000010319	11	13	13	AACAACAACAGATGCAGAAGAAGAG	7	+	1467	1683
ENSDARG00000006219	ENSDART00000010319	11	15	15	ACCAGCAAAAGAAGTGAAGTTTGT	6	+	1593	1683
ENSDARG00000006242	ENSDART00000026814	11	2	1	CACAAATTCATCGAGGTGAGTTC	5	+	100	519
ENSDARG00000006242	ENSDART00000026814	11	4	3	CCCTCCAACCAGATTGTTGATGAT	6	+	235	519
ENSDARG00000006242	ENSDART00000026814	11	6	5	GACATCGCACCAACTGCTGCATTC	6	+	503	519
ENSDARG00000006242	ENSDART00000026814	11	6	5	GAAAGCGGCGTGGAGCATTTAAC	5	+	413	519
ENSDARG00000006275	ENSDART00000003425	11	1	1	CGCCGCTGCCGCACAGGATGAGCT	6	+	719	1503
ENSDARG00000006275	ENSDART00000003425	11	1	1	CGCTGCCTCGCGCAGGCAGTCGTG	6	+	27	1503
ENSDARG00000006275	ENSDART00000003425	11	1	1	CTCCTAGACTAGGTGCGGAGTAC	5	+	323	1503
ENSDARG00000006275	ENSDART00000003425	11	1	1	TTCCACCCAACCTGGTGCCGCTTGT	7	+	449	1503
ENSDARG00000006275	ENSDART00000003425	11	1	1	GCATCCCCCCGGGCGCGCTGGCGGA	7	+	527	1503
ENSDARG00000006275	ENSDART00000003425	11	1	1	TTCAGCAGCATGTCGTCTGCGGCG	6	+	1	1503
ENSDARG00000006275	ENSDART00000003425	11	1	1	TGCGTCAACTACGAGGGAGCCGAC	6	+	121	1503
ENSDARG00000006275	ENSDART00000003425	11	2	2	GAAAAATGCCCGCTGGTTGGTTC	5	+	1408	1503
ENSDARG00000006275	ENSDART00000003425	11	2	2	TGCTCAAGATGCCGTCTGCCGCC	5	+	890	1503
ENSDARG00000006275	ENSDART00000003425	11	2	2	GCCGTCGCACAAGTTCTGTTTTC	5	+	1323	1503
ENSDARG00000006275	ENSDART00000003425	11	2	2	GCACTACACCACCAGAAGCGGCC	5	+	962	1503
ENSDARG00000006275	ENSDART00000003425	11	2	2	AACCTCTCCTGAGCCAGACGGGGAG	7	+	807	1503
ENSDARG00000006275	ENSDART00000003425	11	2	2	AGCATCAAACAGCAGGGGGCGAC	5	+	1360	1503
ENSDARG00000006275	ENSDART00000003425	11	2	2	CACATCGGCCGCAGGACGGCGAA	5	+	1092	1503
ENSDARG00000006275	ENSDART00000003425	11	2	2	CTCCACGACCACATCGGCCGCAGGA	7	+	1083	1503
ENSDARG00000006307	ENSDART00000006038	11	2	2	TGCCCACTCATAACCTTCTGCTGTG	7	+	133	579
ENSDARG00000006307	ENSDART00000006038	11	2	2	CGCTACTGCTGTCTCGATGGCTTC	6	+	172	579
ENSDARG00000006307	ENSDART00000006038	11	2	2	CACTCATAACCTTCTGCTGTGGGA	6	+	137	579
ENSDARG00000006307	ENSDART00000006038	11	3	3	AGCGACGCCAGCAGCGGGGCAGAA	6	+	347	579
ENSDARG00000006337	ENSDART00000005010	11	2	2	AAAATCCTCATGATTGCTGAGAA	5	-	104	1038
ENSDARG00000006337	ENSDART00000005010	11	10	10	GCCTCCTGCGCCGTCAGTCTGGTCT	7	-	938	1038
ENSDARG00000006337	ENSDART00000005010	11	10	10	TGCGCCGTCAGTCTGGTCTGATGGT	7	-	932	1038
ENSDARG00000006341	ENSDART00000021369	11	6	6	TACAGCTGCTGAAACAGTTTGGGTG	7	+	512	2409
ENSDARG00000006341	ENSDART00000021369	11	6	6	GTCGCCAGCGATCAGTGGCAGGT	5	+	478	2409
ENSDARG00000006341	ENSDART00000021369	11	7	7	GACAACCCATGCCCAAGATGCAGCT	7	+	991	2409
ENSDARG00000006341	ENSDART00000021369	11	7	7	TTCACCAAAATAGAGGGGATGGC	5	+	931	2409
ENSDARG00000006341	ENSDART00000021369	11	7	7	CTATGCTGCCGTCTACTGTGCCGCA	7	+	1080	2409
ENSDARG00000006341	ENSDART00000021369	11	7	7	AGCCAAGCCAACGTGAGCATGGTAG	7	+	1021	2409
ENSDARG00000006341	ENSDART00000021369	11	7	7	TCCCACAACAGCTAGATGCAGAC	5	+	956	2409
ENSDARG00000006341	ENSDART00000021369	11	8	8	GACACCACCGTGACCTTTGATGTA	6	+	1297	2409
ENSDARG00000006341	ENSDART00000021369	11	9	9	CTCCTCAGACTGTGGGATAGGAC	5	+	1407	2409
ENSDARG00000006341	ENSDART00000021369	11	9	9	ACCTGCTCCTCAGACTGTGGGATAG	7	+	1402	2409
ENSDARG00000006341	ENSDART00000021369	11	10	10	TGCATCACATGTATGGGTGGGGGC	6	+	1650	2409
ENSDARG00000006341	ENSDART00000021369	11	10	10	TGCATCACATGTATGGGTGGGGG	5	+	1650	2409
ENSDARG00000006341	ENSDART00000021369	11	10	10	TGCATCACATGTATGGGTGGGGGCT	7	+	1650	2409
ENSDARG00000006341	ENSDART00000021369	11	10	10	ACCGTCTGCCGCCTGCAGGAGCC	5	+	1801	2409
ENSDARG00000006341	ENSDART00000021369	11	11	11	AAAACCTACGCGGACGAGGAAGCT	6	+	1928	2409
ENSDARG00000006341	ENSDART00000021369	11	11	11	CAATACGTCGCCAGTTTGGATGT	5	+	2029	2409
ENSDARG00000006341	ENSDART00000021369	11	11	11	TACTGCGTCATGTGGGTGATGTT	5	+	2224	2409
ENSDARG00000006341	ENSDART00000021369	11	11	11	AACCTACGCGGACGAGGAAGCTGGT	7	+	1930	2409
ENSDARG00000006341	ENSDART00000102769	11	6	6	GTCGCCAGCGATCAGTGGCAGGT	5	+	550	2499
ENSDARG00000006341	ENSDART00000102769	11	6	6	TACAGCTGCTGAAACAGTTTGGGTG	7	+	584	2499
ENSDARG00000006341	ENSDART00000102769	11	7	7	TTCACCAAAATAGAGGGGATGGC	5	+	1003	2499
ENSDARG00000006341	ENSDART00000102769	11	7	7	TCCCACAACAGCTAGATGCAGAC	5	+	1028	2499
ENSDARG00000006341	ENSDART00000102769	11	7	7	AGCCAAGCCAACGTGAGCATGGTAG	7	+	1093	2499
ENSDARG00000006341	ENSDART00000102769	11	7	7	CTATGCTGCCGTCTACTGTGCCGCA	7	+	1152	2499
ENSDARG00000006341	ENSDART00000102769	11	7	7	GACAACCCATGCCCAAGATGCAGCT	7	+	1063	2499
ENSDARG00000006341	ENSDART00000102769	11	8	8	GACACCACCGTGACCTTTGATGTA	6	+	1369	2499
ENSDARG00000006341	ENSDART00000102769	11	9	9	CTCCTCAGACTGTGGGATAGGAC	5	+	1479	2499
ENSDARG00000006341	ENSDART00000102769	11	9	9	ACCTGCTCCTCAGACTGTGGGATAG	7	+	1474	2499
ENSDARG00000006341	ENSDART00000102769	11	10	10	TGCATCACATGTATGGGTGGGGGCT	7	+	1722	2499
ENSDARG00000006341	ENSDART00000102769	11	10	10	ACCGTCTGCCGCCTGCAGGAGCC	5	+	1873	2499
ENSDARG00000006341	ENSDART00000102769	11	10	10	TGCATCACATGTATGGGTGGGGGC	6	+	1722	2499
ENSDARG00000006341	ENSDART00000102769	11	10	10	TGCATCACATGTATGGGTGGGGG	5	+	1722	2499
ENSDARG00000006341	ENSDART00000102769	11	11	11	TACTGCGTCATGTGGGTGATGTT	5	+	2296	2499
ENSDARG00000006341	ENSDART00000102769	11	11	11	AAAACCTACGCGGACGAGGAAGCT	6	+	2000	2499
ENSDARG00000006341	ENSDART00000102769	11	11	11	CAATACGTCGCCAGTTTGGATGT	5	+	2101	2499
ENSDARG00000006341	ENSDART00000102769	11	11	11	AACCTACGCGGACGAGGAAGCTGGT	7	+	2002	2499
ENSDARG00000006341	ENSDART00000102772	11	4	4	TACAGCTGCTGAAACAGTTTGGGTG	7	+	581	2505
ENSDARG00000006341	ENSDART00000102772	11	4	4	GTCGCCAGCGATCAGTGGCAGGT	5	+	547	2505
ENSDARG00000006341	ENSDART00000102772	11	5	5	GACAACCCATGCCCAAGATGCAGCT	7	+	1060	2505
ENSDARG00000006341	ENSDART00000102772	11	5	5	AGCCAAGCCAACGTGAGCATGGTAG	7	+	1090	2505
ENSDARG00000006341	ENSDART00000102772	11	5	5	CTATGCTGCCGTCTACTGTGCCGCA	7	+	1149	2505
ENSDARG00000006341	ENSDART00000102772	11	5	5	TTCACCAAAATAGAGGGGATGGC	5	+	1000	2505
ENSDARG00000006341	ENSDART00000102772	11	5	5	TCCCACAACAGCTAGATGCAGAC	5	+	1025	2505
ENSDARG00000006341	ENSDART00000102772	11	6	6	GACACCACCGTGACCTTTGATGTA	6	+	1366	2505
ENSDARG00000006341	ENSDART00000102772	11	7	7	ACCTGCTCCTCAGACTGTGGGATAG	7	+	1471	2505
ENSDARG00000006341	ENSDART00000102772	11	7	7	CTCCTCAGACTGTGGGATAGGAC	5	+	1476	2505
ENSDARG00000006341	ENSDART00000102772	11	8	8	TGCATCACATGTATGGGTGGGGGC	6	+	1722	2505
ENSDARG00000006341	ENSDART00000102772	11	8	8	TGCATCACATGTATGGGTGGGGG	5	+	1722	2505
ENSDARG00000006341	ENSDART00000102772	11	8	8	TGCATCACATGTATGGGTGGGGGCT	7	+	1722	2505
ENSDARG00000006341	ENSDART00000102772	11	8	8	ACCGTCTGCCGCCTGCAGGAGCC	5	+	1873	2505
ENSDARG00000006341	ENSDART00000102772	11	9	9	TACTGCGTCATGTGGGTGATGTT	5	+	2296	2505
ENSDARG00000006341	ENSDART00000102772	11	9	9	AACCTACGCGGACGAGGAAGCTGGT	7	+	2002	2505
ENSDARG00000006341	ENSDART00000102772	11	9	9	CAATACGTCGCCAGTTTGGATGT	5	+	2101	2505
ENSDARG00000006341	ENSDART00000102772	11	9	9	AAAACCTACGCGGACGAGGAAGCT	6	+	2000	2505
ENSDARG00000006341	ENSDART00000102773	11	4	4	TACAGCTGCTGAAACAGTTTGGGTG	7	+	626	2553
ENSDARG00000006341	ENSDART00000102773	11	4	4	GTCGCCAGCGATCAGTGGCAGGT	5	+	592	2553
ENSDARG00000006341	ENSDART00000102773	11	5	5	CTATGCTGCCGTCTACTGTGCCGCA	7	+	1194	2553
ENSDARG00000006341	ENSDART00000102773	11	5	5	AGCCAAGCCAACGTGAGCATGGTAG	7	+	1135	2553
ENSDARG00000006341	ENSDART00000102773	11	5	5	TCCCACAACAGCTAGATGCAGAC	5	+	1070	2553
ENSDARG00000006341	ENSDART00000102773	11	5	5	TTCACCAAAATAGAGGGGATGGC	5	+	1045	2553
ENSDARG00000006341	ENSDART00000102773	11	5	5	GACAACCCATGCCCAAGATGCAGCT	7	+	1105	2553
ENSDARG00000006341	ENSDART00000102773	11	6	6	GACACCACCGTGACCTTTGATGTA	6	+	1411	2553
ENSDARG00000006341	ENSDART00000102773	11	7	7	CTCCTCAGACTGTGGGATAGGAC	5	+	1521	2553
ENSDARG00000006341	ENSDART00000102773	11	7	7	ACCTGCTCCTCAGACTGTGGGATAG	7	+	1516	2553
ENSDARG00000006341	ENSDART00000102773	11	8	8	ACCGTCTGCCGCCTGCAGGAGCC	5	+	1918	2553
ENSDARG00000006341	ENSDART00000102773	11	8	8	TGCATCACATGTATGGGTGGGGGCT	7	+	1767	2553
ENSDARG00000006341	ENSDART00000102773	11	8	8	TGCATCACATGTATGGGTGGGGGC	6	+	1767	2553
ENSDARG00000006341	ENSDART00000102773	11	8	8	TGCATCACATGTATGGGTGGGGG	5	+	1767	2553
ENSDARG00000006341	ENSDART00000102773	11	9	9	AAAACCTACGCGGACGAGGAAGCT	6	+	2045	2553
ENSDARG00000006341	ENSDART00000102773	11	9	9	AACCTACGCGGACGAGGAAGCTGGT	7	+	2047	2553
ENSDARG00000006341	ENSDART00000102773	11	9	9	TACTGCGTCATGTGGGTGATGTT	5	+	2341	2553
ENSDARG00000006341	ENSDART00000102773	11	9	9	CAATACGTCGCCAGTTTGGATGT	5	+	2146	2553
ENSDARG00000006601	ENSDART00000003151	11	1	1	TCCTTCATCTGCCGCAGGAGATGCA	7	-	50	1074
ENSDARG00000006601	ENSDART00000003151	11	3	3	CTCGGCCTCCAGCTCTTTGACTCT	6	-	478	1074
ENSDARG00000006601	ENSDART00000003151	11	7	7	CACCCACTCCTGACTGCCGTTGAC	6	-	673	1074
ENSDARG00000006601	ENSDART00000003151	11	7	7	ACCCACTCCTGACTGCCGTTGAC	5	-	673	1074
ENSDARG00000006601	ENSDART00000018839	11	1	1	TCCTTCATCTGCCGCAGGAGATGCA	7	-	62	1050
ENSDARG00000006601	ENSDART00000018839	11	3	3	CTCGGCCTCCAGCTCTTTGACTCT	6	-	490	1050
ENSDARG00000006601	ENSDART00000018839	11	4	4	CACCCACTCCTGACTGCCGTTGAC	6	-	598	1050
ENSDARG00000006601	ENSDART00000018839	11	4	4	ACCCACTCCTGACTGCCGTTGAC	5	-	598	1050
ENSDARG00000006601	ENSDART00000088888	11	1	1	CAACTCGGCCAATCTGCGGCTGGT	6	-	106	1290
ENSDARG00000006601	ENSDART00000088888	11	1	1	CCCCAACTCGGCCAATCTGCGGCT	6	-	109	1290
ENSDARG00000006601	ENSDART00000088888	11	2	2	AGAAACCACTGTCTTCTGCCGGT	5	-	221	1290
ENSDARG00000006601	ENSDART00000088888	11	3	3	TCCTTCATCTGCCGCAGGAGATGCA	7	-	353	1290
ENSDARG00000006601	ENSDART00000088888	11	5	5	CTCGGCCTCCAGCTCTTTGACTCT	6	-	781	1290
ENSDARG00000006601	ENSDART00000088888	11	6	6	CACCCACTCCTGACTGCCGTTGAC	6	-	889	1290
ENSDARG00000006601	ENSDART00000088888	11	6	6	ACCCACTCCTGACTGCCGTTGAC	5	-	889	1290
ENSDARG00000006775	ENSDART00000023823	11	1	1	CTCATCTTCGGTTTCAGCCGTGTTG	7	-	42	2262
ENSDARG00000006775	ENSDART00000023823	11	1	1	GCACACTTCCACCAGCCGGTGCT	5	-	121	2262
ENSDARG00000006775	ENSDART00000023823	11	3	3	ATCTGCACCAGTTTTGGGATGAGCA	7	-	423	2262
ENSDARG00000006775	ENSDART00000023823	11	3	3	ATCTGCACCAGTTTTGGGATGAG	5	-	425	2262
ENSDARG00000006775	ENSDART00000023823	11	5	5	TGCTCCTCCACTGGCTGCTGACGAA	7	-	1129	2262
ENSDARG00000006775	ENSDART00000023823	11	5	5	GTTCACATCCCTGTTTTTGTGGAA	6	-	500	2262
ENSDARG00000006775	ENSDART00000023823	11	5	5	ACCTTCTAAAGGCTGTCTGAAGGG	6	-	880	2262
ENSDARG00000006775	ENSDART00000023823	11	5	5	CTCCTCCACTGGCTGCTGACGAA	5	-	1129	2262
ENSDARG00000006775	ENSDART00000023823	11	5	5	CTCTGCTCCTCCACTGGCTGCTGAC	7	-	1132	2262
ENSDARG00000006775	ENSDART00000023823	11	5	5	GTTTACCCCTGTACTCGAGTGGTTC	7	-	805	2262
ENSDARG00000006775	ENSDART00000023823	11	11	11	TGCTCAATCTCTGCTGTTGTCTGT	6	-	1761	2262
ENSDARG00000006775	ENSDART00000023823	11	12	12	CTCACCGGCTTCTCGACTTTTAG	5	-	2069	2262
ENSDARG00000006775	ENSDART00000023823	11	12	12	GACTGCTTATGAACACGCTGATGGC	7	-	1951	2262
ENSDARG00000006775	ENSDART00000023823	11	12	12	CACTGCAGAGAGTGTTGACGAGTCT	7	-	2041	2262
ENSDARG00000006775	ENSDART00000023823	11	12	12	CACCAAGGCTAGTTGCTTGAGCT	5	-	2126	2262
ENSDARG00000006916	ENSDART00000016475	11	1	1	TCCAGCTCCGACACCCGGCGGTGCA	7	-	65	543
ENSDARG00000006916	ENSDART00000016475	11	1	1	GTCCTCTCCGCCTCTCGCAGCCGCT	7	-	92	543
ENSDARG00000006916	ENSDART00000016475	11	1	1	CTCTCCGCCTCTCGCAGCCGCTGCT	7	-	89	543
ENSDARG00000006916	ENSDART00000016475	11	1	1	CTCCGCCTCTCGCAGCCGCTGCT	5	-	89	543
ENSDARG00000006916	ENSDART00000016475	11	1	1	AGCTCCGACACCCGGCGGTGCAGCG	7	-	62	543
ENSDARG00000006916	ENSDART00000016475	11	2	2	AGAGTCGTCCTCGCTGAGTGAGAA	6	-	487	543
ENSDARG00000006916	ENSDART00000016475	11	2	2	AGAGGCGGCTGGGGCTGCAGTTGGA	7	-	448	543
ENSDARG00000006916	ENSDART00000064361	11	1	1	TCCAGCTCCGACACCCGGCGGTGCA	7	-	65	501
ENSDARG00000006916	ENSDART00000064361	11	1	1	GTCCTCTCCGCCTCTCGCAGCCGCT	7	-	92	501
ENSDARG00000006916	ENSDART00000064361	11	1	1	CTCTCCGCCTCTCGCAGCCGCTGCT	7	-	89	501
ENSDARG00000006916	ENSDART00000064361	11	1	1	CTCCGCCTCTCGCAGCCGCTGCT	5	-	89	501
ENSDARG00000006916	ENSDART00000064361	11	1	1	AGCTCCGACACCCGGCGGTGCAGCG	7	-	62	501
ENSDARG00000006923	ENSDART00000008139	11	1	1	AGCCCCCGCCGCCGCCGCCGCCGTA	7	-	43	5631
ENSDARG00000006923	ENSDART00000008139	11	1	1	GCCCCCGCCGCCGCCGCCGCCGTA	6	-	43	5631
ENSDARG00000006923	ENSDART00000008139	11	3	3	ATCTCCAACTGGTAAGTGTTGTTC	6	-	361	5631
ENSDARG00000006923	ENSDART00000008139	11	6	6	AAAAGCACACCAATTTGCAGCAGTG	7	-	683	5631
ENSDARG00000006923	ENSDART00000008139	11	6	6	AGCTCACCAGTGATGGTGTTGAA	5	-	778	5631
ENSDARG00000006923	ENSDART00000008139	11	9	9	TGCTGCTGCCGTTTGAGCTTGAGGA	7	-	1121	5631
ENSDARG00000006923	ENSDART00000008139	11	11	11	GTCCACTCCCTCTTGTGGATTTAAC	7	-	1299	5631
ENSDARG00000006923	ENSDART00000008139	11	12	12	AGCTCAGGCTGATCGTAGTGTAC	5	-	1495	5631
ENSDARG00000006923	ENSDART00000008139	11	12	12	TACAGCCACACACAGTGTGTTGAG	6	-	1471	5631
ENSDARG00000006923	ENSDART00000008139	11	12	12	AGCCACACACAGTGTGTTGAGTGC	6	-	1468	5631
ENSDARG00000006923	ENSDART00000008139	11	12	12	AGCCACACACAGTGTGTTGAGTG	5	-	1469	5631
ENSDARG00000006923	ENSDART00000008139	11	12	12	ACAGCCACACACAGTGTGTTGAGTG	7	-	1469	5631
ENSDARG00000006923	ENSDART00000008139	11	12	12	ACAGCCACACACAGTGTGTTGAG	5	-	1471	5631
ENSDARG00000006923	ENSDART00000008139	11	17	17	TTCCAATCCTCTCCTGTTAGAATCT	7	-	1964	5631
ENSDARG00000006923	ENSDART00000008139	11	19	19	AGAGCCATCTTTTGTGTTGTGGCC	6	-	2172	5631
ENSDARG00000006923	ENSDART00000008139	11	21	21	CCCTCCGCCTGTGCTGGTGGTGTC	6	-	2687	5631
ENSDARG00000006923	ENSDART00000008139	11	21	21	TCCCTCCGCCTGTGCTGGTGGTGTC	7	-	2687	5631
ENSDARG00000006923	ENSDART00000008139	11	21	21	CTCTGCATCTCCTCCAGCCGTCTCT	7	-	2763	5631
ENSDARG00000006923	ENSDART00000008139	11	21	21	GTCTCCATCCCCATGGTTAGCATGT	7	-	2820	5631
ENSDARG00000006923	ENSDART00000008139	11	21	21	GACTTCTTATTGCGATGCAGTCGAC	7	-	2861	5631
ENSDARG00000006923	ENSDART00000008139	11	23	23	TTCTTCTCCCCTTCTTTAGCTGGC	6	-	3195	5631
ENSDARG00000006923	ENSDART00000008139	11	24	24	GACAGCATCTCCGGAAGCTGAAAAC	7	-	3301	5631
ENSDARG00000006923	ENSDART00000008139	11	24	24	TTCTGCTGCTAACGCGATGCTGCT	6	-	3382	5631
ENSDARG00000006923	ENSDART00000008139	11	25	25	GAACACTCCAGTAAAGACGTAGTC	6	-	3454	5631
ENSDARG00000006923	ENSDART00000008139	11	28	28	CACGGCCACCACAGCGAAGATGAA	6	-	3778	5631
ENSDARG00000006923	ENSDART00000008139	11	29	29	GCCCAAAGCACATTGTCGTAGTG	5	-	3940	5631
ENSDARG00000006923	ENSDART00000008139	11	29	29	CCCAAAGCACATTGTCGTAGTGGAA	7	-	3937	5631
ENSDARG00000006923	ENSDART00000008139	11	29	29	CAAAGCACATTGTCGTAGTGGAA	5	-	3937	5631
ENSDARG00000006923	ENSDART00000008139	11	31	31	ACCTTCATCATAAGGATGATGGT	5	-	4354	5631
ENSDARG00000006923	ENSDART00000008139	11	34	34	TCCAAAGCAGAATGCGAATGGTCT	6	-	4643	5631
ENSDARG00000006923	ENSDART00000008139	11	34	34	GTCCAAAGCAGAATGCGAATGGTCT	7	-	4643	5631
ENSDARG00000006923	ENSDART00000008139	11	34	34	CCCTGCCGCAAGAGCTTAATGAGAC	7	-	4616	5631
ENSDARG00000006923	ENSDART00000008139	11	41	41	CTCCGCGTCCATCTGGTGTTTGTC	6	-	5329	5631
ENSDARG00000006923	ENSDART00000008139	11	41	41	CTCCGCGTCCATCTGGTGTTTGT	5	-	5330	5631
ENSDARG00000006923	ENSDART00000008139	11	43	43	TCCCCCTTCCTGGTTTGGGGACGGC	7	-	5565	5631
ENSDARG00000006963	ENSDART00000013203	11	9	8	TGCTCAAAAATATGATGAAGAGTTC	7	+	843	2913
ENSDARG00000006963	ENSDART00000013203	11	12	11	ACACAAGACGCAGAGCAGCCTGT	5	+	1148	2913
ENSDARG00000006963	ENSDART00000013203	11	12	11	AGACGCAGAGCAGCCTGTGATTTG	6	+	1153	2913
ENSDARG00000006963	ENSDART00000013203	11	12	11	TACGCCAAAAACCCTGGTGTGAAC	6	+	1255	2913
ENSDARG00000006963	ENSDART00000013203	11	12	11	AAAGACATCGACACAAGACGCAGAG	7	+	1138	2913
ENSDARG00000006963	ENSDART00000013203	11	15	14	TCCAGCTTCCTAAAGAGCAGCTGTT	7	+	1487	2913
ENSDARG00000006963	ENSDART00000013203	11	15	14	GGCAACAACACCACCCTGTGAGTTC	7	+	1612	2913
ENSDARG00000006963	ENSDART00000013203	11	15	14	CAACAACACCACCCTGTGAGTTC	5	+	1614	2913
ENSDARG00000006963	ENSDART00000013203	11	15	14	CTCTTCACCATGAGAGGAGGCAAC	6	+	1594	2913
ENSDARG00000006963	ENSDART00000013203	11	15	14	AGACTCTTCACCATGAGAGGAGGCA	7	+	1591	2913
ENSDARG00000006963	ENSDART00000013203	11	17	16	CTCCGCAGCCATCATGAGGAGTTT	6	+	1725	2913
ENSDARG00000006963	ENSDART00000013203	11	19	18	CTCATCTCCTGCAGCCTGTGCTGTG	7	+	2069	2913
ENSDARG00000006963	ENSDART00000013203	11	19	18	ATCTCCTGCAGCCTGTGCTGTGGGA	7	+	2072	2913
ENSDARG00000006963	ENSDART00000013203	11	19	18	TCCTGCAGCCTGTGCTGTGGGAGCG	7	+	2075	2913
ENSDARG00000006963	ENSDART00000013203	11	19	18	ACATCCCTCCGCTTGTGCGTCTGC	6	+	2108	2913
ENSDARG00000006963	ENSDART00000013203	11	19	18	TCCCTCCGCTTGTGCGTCTGCTGCA	7	+	2111	2913
ENSDARG00000006963	ENSDART00000013203	11	24	23	CACGACCCCATCGGCGACGCCGTC	6	+	2749	2913
ENSDARG00000006963	ENSDART00000013203	11	25	24	GGCGGCCACTGTACAGCTGGTGTA	6	+	2901	2913
ENSDARG00000007024	ENSDART00000024046	11	4	4	TTCATCCACTGCCCTGAGGCTTTG	6	+	385	894
ENSDARG00000007024	ENSDART00000024046	11	4	4	ATCCACTGCCCTGAGGCTTTGCG	5	+	388	894
ENSDARG00000007024	ENSDART00000024046	11	5	5	GACTACACAAACTGGATTTGAGGGC	7	+	486	894
ENSDARG00000007024	ENSDART00000024046	11	5	5	GAAGACTACACAAACTGGATTTGAG	7	+	483	894
ENSDARG00000007024	ENSDART00000024046	11	5	5	CTACACAAACTGGATTTGAGGGC	5	+	488	894
ENSDARG00000007024	ENSDART00000024046	11	5	5	CTACAACACGATAAATGTGGCATTT	7	+	588	894
ENSDARG00000007024	ENSDART00000024046	11	5	5	AGACTACACAAACTGGATTTGAG	5	+	485	894
ENSDARG00000007024	ENSDART00000024046	11	8	8	AACATCACAGGCACTGTGTGCAGAA	7	+	862	894
ENSDARG00000007130	ENSDART00000002556	11	2	2	AACCCCTTCTTGGTTGTTTTGGT	5	-	46	726
ENSDARG00000007130	ENSDART00000002556	11	2	2	AACCCCTTCTTGGTTGTTTTGGTT	6	-	45	726
ENSDARG00000007130	ENSDART00000002556	11	2	2	AACCTCTTCAATCAAGTTTTGTTT	6	-	76	726
ENSDARG00000007130	ENSDART00000002556	11	2	2	TTCCAACCCCTTCTTGGTTGTTTTG	7	-	48	726
ENSDARG00000007130	ENSDART00000002556	11	2	2	TCCAACCCCTTCTTGGTTGTTTTG	6	-	48	726
ENSDARG00000007130	ENSDART00000002556	11	3	3	GTCTGCACATTTCCGCAGCTGAG	5	-	92	726
ENSDARG00000007130	ENSDART00000002556	11	3	3	GAACACAAACACGTATCTGTAGAT	6	-	115	726
ENSDARG00000007130	ENSDART00000002556	11	3	3	CACAAACACGTATCTGTAGATGTC	6	-	112	726
ENSDARG00000007130	ENSDART00000002556	11	5	5	CACTTCATCTTTAGTTTTGTTTGT	6	-	322	726
ENSDARG00000007130	ENSDART00000002556	11	6	6	GTCACCGCCATGCTTGCTGTGTTT	6	-	393	726
ENSDARG00000007130	ENSDART00000002556	11	6	6	TGCGGCTCCATTGAGTGTGGAAAC	6	-	441	726
ENSDARG00000007195	ENSDART00000012940	11	3	3	TACTCCATCAGGGAGTTTGAGGA	5	+	1021	2511
ENSDARG00000007195	ENSDART00000012940	11	3	3	TACTCCATCAGGGAGTTTGAGGAC	6	+	1021	2511
ENSDARG00000007195	ENSDART00000012940	11	3	3	TGCTGCCGCAGCCAGGATGAATGT	6	+	894	2511
ENSDARG00000007195	ENSDART00000012940	11	3	3	TTCTCAAGACTAAGTTTGATGGT	5	+	1325	2511
ENSDARG00000007195	ENSDART00000012940	11	3	3	CAATACCACAAAAGTGTGTGACGCT	7	+	1260	2511
ENSDARG00000007195	ENSDART00000012940	11	3	3	CAAGACTAAGTTTGATGGTGAGTAA	7	+	1329	2511
ENSDARG00000007195	ENSDART00000012940	11	3	3	CAAGACTAAGTTTGATGGTGAGTA	6	+	1329	2511
ENSDARG00000007195	ENSDART00000012940	11	3	3	AAAGCCTAAGAAACGACTTGTTT	5	+	1151	2511
ENSDARG00000007195	ENSDART00000012940	11	3	3	AGAATCAAAGATCATGTTTGTGGTG	7	+	1179	2511
ENSDARG00000007195	ENSDART00000012940	11	4	4	CTCTGCCCAGCTCTTGGTGGCTCT	6	+	2100	2511
ENSDARG00000007195	ENSDART00000012940	11	4	4	CCCTGCGTCGCCTGGGCCTTGGCA	6	+	1937	2511
ENSDARG00000007195	ENSDART00000012940	11	4	4	CTACTCTGCTTTGCTGACGAAGAC	6	+	1977	2511
ENSDARG00000007195	ENSDART00000012940	11	4	4	AGCCAAACCCTCAGCATTTGTGTGC	7	+	1911	2511
ENSDARG00000007195	ENSDART00000012940	11	4	4	GTTTGCTACTCTGCTTTGCTGAC	5	+	1972	2511
ENSDARG00000007195	ENSDART00000012940	11	4	4	GCCAAACCCTCAGCATTTGTGTGC	6	+	1912	2511
ENSDARG00000007195	ENSDART00000012940	11	4	4	GCATGCAGCCTGGGGATGTATGC	5	+	1571	2511
ENSDARG00000007195	ENSDART00000012940	11	5	5	ACATCATCCTTTTCCAGCCGCAGAA	7	+	2483	2511
ENSDARG00000007195	ENSDART00000012940	11	5	5	GCAGACCACCACCATGTGCATCT	5	+	2406	2511
ENSDARG00000007195	ENSDART00000061529	11	1	1	TACTCCATCAGGGAGTTTGAGGA	5	+	535	1890
ENSDARG00000007195	ENSDART00000061529	11	1	1	TACTCCATCAGGGAGTTTGAGGAC	6	+	535	1890
ENSDARG00000007195	ENSDART00000061529	11	1	1	TGCTGCCGCAGCCAGGATGAATGT	6	+	408	1890
ENSDARG00000007195	ENSDART00000061529	11	1	1	CAATACCACAAAAGTGTGTGACGCT	7	+	774	1890
ENSDARG00000007195	ENSDART00000061529	11	1	1	CAAGACTAAGTTTGATGGTGAGTAA	7	+	843	1890
ENSDARG00000007195	ENSDART00000061529	11	1	1	CAAGACTAAGTTTGATGGTGAGTA	6	+	843	1890
ENSDARG00000007195	ENSDART00000061529	11	1	1	TTCTCAAGACTAAGTTTGATGGT	5	+	839	1890
ENSDARG00000007195	ENSDART00000061529	11	1	1	AGAATCAAAGATCATGTTTGTGGTG	7	+	693	1890
ENSDARG00000007195	ENSDART00000061529	11	1	1	AAAGCCTAAGAAACGACTTGTTT	5	+	665	1890
ENSDARG00000007195	ENSDART00000061529	11	2	2	GTCTCAGTCAGAGCTTAGATGGT	5	+	879	1890
ENSDARG00000007195	ENSDART00000061529	11	4	4	GTTTGCTACTCTGCTTTGCTGAC	5	+	1432	1890
ENSDARG00000007195	ENSDART00000061529	11	4	4	GCCAAACCCTCAGCATTTGTGTGC	6	+	1372	1890
ENSDARG00000007195	ENSDART00000061529	11	4	4	GCATGCAGCCTGGGGATGTATGC	5	+	1031	1890
ENSDARG00000007195	ENSDART00000061529	11	4	4	CTCTGCCCAGCTCTTGGTGGCTCT	6	+	1560	1890
ENSDARG00000007195	ENSDART00000061529	11	4	4	CTACTCTGCTTTGCTGACGAAGAC	6	+	1437	1890
ENSDARG00000007195	ENSDART00000061529	11	4	4	CCCTGCGTCGCCTGGGCCTTGGCA	6	+	1397	1890
ENSDARG00000007195	ENSDART00000061529	11	4	4	AGCCAAACCCTCAGCATTTGTGTGC	7	+	1371	1890
ENSDARG00000007207	ENSDART00000056065	11	2	1	CAAGACGTCAAATGTGGAGGTATTT	7	+	91	555
ENSDARG00000007207	ENSDART00000056065	11	4	3	AGCTCCAGCTTAAAGTTTGCTGTA	6	+	406	555
ENSDARG00000007278	ENSDART00000011087	11	4	3	TACCTCTCCCTTGTTGGCGCAGTG	6	-	385	2634
ENSDARG00000007278	ENSDART00000011087	11	6	5	GTCAAAGTCTTTTCTGATGGTGCC	6	-	529	2634
ENSDARG00000007278	ENSDART00000011087	11	8	7	GTCCTCTCCTCCATGTTGTTTTT	5	-	778	2634
ENSDARG00000007278	ENSDART00000011087	11	8	7	CTCTCCTCCATGTTGTTTTTTTC	5	-	775	2634
ENSDARG00000007278	ENSDART00000011087	11	9	8	TCCTCAACAACCAAGTGGGTGCA	5	-	844	2634
ENSDARG00000007278	ENSDART00000011087	11	9	8	CTCCTCAACAACCAAGTGGGTGCA	6	-	844	2634
ENSDARG00000007278	ENSDART00000011087	11	11	10	TTCTACCTCCACTGGATTTGGTGTC	7	-	1192	2634
ENSDARG00000007278	ENSDART00000011087	11	11	10	TTCTACCTCCACTGGATTTGGTG	5	-	1194	2634
ENSDARG00000007278	ENSDART00000011087	11	11	10	ATCTCCGTCTCTTTGGTAAGCTGAG	7	-	1085	2634
ENSDARG00000007278	ENSDART00000011087	11	11	10	TTCTGCCACTGTTGGGCGTCGTG	5	-	1035	2634
ENSDARG00000007278	ENSDART00000011087	11	13	12	TTCTCCAGCGGATATTTGAAGAG	5	-	1336	2634
ENSDARG00000007278	ENSDART00000011087	11	15	14	TTCACCAGCTCTCCAGACTGAGAG	6	-	1518	2634
ENSDARG00000007278	ENSDART00000011087	11	16	15	TTACCATTCAGCAGGAGGGCGAC	5	-	1714	2634
ENSDARG00000007278	ENSDART00000011087	11	17	16	GTTGTCATCTGATGTGTGTTTCT	5	-	1739	2634
ENSDARG00000007278	ENSDART00000011087	11	18	17	AACAACATCAAAGATCTGCTTCT	5	-	1850	2634
ENSDARG00000007278	ENSDART00000011087	11	19	18	GAACCAGACTTCGGTGTGACGAT	5	-	1905	2634
ENSDARG00000007278	ENSDART00000011087	11	21	20	GTCTTCAGCCGTCAGCTGGAAAC	5	-	2216	2634
ENSDARG00000007278	ENSDART00000081827	11	4	4	TACCTCTCCCTTGTTGGCGCAGTG	6	-	481	2928
ENSDARG00000007278	ENSDART00000081827	11	6	6	GTCAAAGTCTTTTCTGATGGTGCC	6	-	625	2928
ENSDARG00000007278	ENSDART00000081827	11	8	8	GTCCTCTCCTCCATGTTGTTTTT	5	-	874	2928
ENSDARG00000007278	ENSDART00000081827	11	8	8	CTCTCCTCCATGTTGTTTTTTTC	5	-	871	2928
ENSDARG00000007278	ENSDART00000081827	11	9	9	CTCCTCAACAACCAAGTGGGTGCA	6	-	940	2928
ENSDARG00000007278	ENSDART00000081827	11	9	9	TCCTCAACAACCAAGTGGGTGCA	5	-	940	2928
ENSDARG00000007278	ENSDART00000081827	11	11	11	TTCTACCTCCACTGGATTTGGTG	5	-	1290	2928
ENSDARG00000007278	ENSDART00000081827	11	11	11	TTCTGCCACTGTTGGGCGTCGTG	5	-	1131	2928
ENSDARG00000007278	ENSDART00000081827	11	11	11	TTCTACCTCCACTGGATTTGGTGTC	7	-	1288	2928
ENSDARG00000007278	ENSDART00000081827	11	11	11	ATCTCCGTCTCTTTGGTAAGCTGAG	7	-	1181	2928
ENSDARG00000007278	ENSDART00000081827	11	13	13	TTCTCCAGCGGATATTTGAAGAG	5	-	1432	2928
ENSDARG00000007278	ENSDART00000081827	11	15	15	TTCACCAGCTCTCCAGACTGAGAG	6	-	1614	2928
ENSDARG00000007278	ENSDART00000081827	11	16	16	TTACCATTCAGCAGGAGGGCGAC	5	-	1810	2928
ENSDARG00000007278	ENSDART00000081827	11	17	17	GTTGTCATCTGATGTGTGTTTCT	5	-	1835	2928
ENSDARG00000007278	ENSDART00000081827	11	18	18	AACAACATCAAAGATCTGCTTCT	5	-	1946	2928
ENSDARG00000007278	ENSDART00000081827	11	19	19	GAACCAGACTTCGGTGTGACGAT	5	-	2001	2928
ENSDARG00000007278	ENSDART00000081827	11	21	21	GTCTTCAGCCGTCAGCTGGAAAC	5	-	2312	2928
ENSDARG00000007278	ENSDART00000081827	11	24	24	ACCTGCGCCCCGGCTCTGGAGGT	5	-	2883	2928
ENSDARG00000007278	ENSDART00000081827	11	24	24	ACACACACCGGGACTCGGGGCCGTG	7	-	2738	2928
ENSDARG00000007407	ENSDART00000023889	11	1	1	TGCAACATCCTTTGGAGATTGGGGC	7	+	11	744
ENSDARG00000007407	ENSDART00000023889	11	2	2	AACTACAGCTGATGGGTTTGGAA	5	+	440	744
ENSDARG00000007407	ENSDART00000023889	11	2	2	CAAGACAAAGAAAGGAAGAAGGA	5	+	399	744
ENSDARG00000007407	ENSDART00000023889	11	4	4	TCCCCACCAGTGAGCAGCTGTCGGA	7	+	653	744
ENSDARG00000007407	ENSDART00000023889	11	4	4	GACCGCTTATCCGACGGTGGAGCT	6	+	700	744
ENSDARG00000007407	ENSDART00000023889	11	4	4	ATCCCCACCAGTGAGCAGCTGTC	5	+	652	744
ENSDARG00000007407	ENSDART00000023889	11	4	4	AGCTTCTTCACTTTCTGATGCAAAC	7	+	720	744
ENSDARG00000007494	ENSDART00000002846	11	2	1	GTCATCATCTCTGCCGGTGAGGTA	6	-	280	1023
ENSDARG00000007494	ENSDART00000002846	11	2	1	AACACCAGCCTTCTGAATGGTGT	5	-	80	1023
ENSDARG00000007494	ENSDART00000002846	11	2	1	TACGTCATCATCTCTGCCGGTGAG	6	-	283	1023
ENSDARG00000007494	ENSDART00000002846	11	3	2	AAACGCACCTAATAACTGTTGAGTG	7	-	505	1023
ENSDARG00000007494	ENSDART00000002846	11	3	2	CAAGGCTCCATATTTGGACTTTAAC	7	-	471	1023
ENSDARG00000007494	ENSDART00000002846	11	3	2	GTTTCATCCTCATGTGGAGGGGAA	6	-	393	1023
ENSDARG00000007494	ENSDART00000002846	11	3	2	AACATCTTCTGAGTGACGTCTTT	5	-	361	1023
ENSDARG00000007494	ENSDART00000002846	11	6	5	AACCTCGTCACAGAGATGCAGAG	5	-	848	1023
ENSDARG00000007494	ENSDART00000002846	11	7	6	GAAATCAGCATTGTGGACGCCTGT	6	-	955	1023
ENSDARG00000007494	ENSDART00000002846	11	7	6	AAAGGCACCTGCGTATCTGTTGTA	6	-	925	1023
ENSDARG00000007601	ENSDART00000040235	11	2	2	CTCACCACAGACCCTGTTGATGTT	6	+	238	3498
ENSDARG00000007601	ENSDART00000040235	11	2	2	CACCACAGACCCTGTTGATGTTGTA	7	+	240	3498
ENSDARG00000007601	ENSDART00000040235	11	3	3	TGCTCACACTGGACCAGCTGTCGTT	7	+	464	3498
ENSDARG00000007601	ENSDART00000040235	11	5	5	TACGGCTCCACTGAGGCTTTTCT	5	+	640	3498
ENSDARG00000007601	ENSDART00000040235	11	6	6	AAAATCTGCGAACATGAAGTATGT	6	+	748	3498
ENSDARG00000007601	ENSDART00000040235	11	8	8	GTAACCCTCATCCTCTGGTTTGGG	6	+	845	3498
ENSDARG00000007601	ENSDART00000040235	11	8	8	GACAAAGACGGACAAGTGGACGCA	6	+	913	3498
ENSDARG00000007601	ENSDART00000040235	11	8	8	ACCCTCATCCTCTGGTTTGGGCC	5	+	848	3498
ENSDARG00000007601	ENSDART00000040235	11	8	8	GTAACCCTCATCCTCTGGTTTGGGC	7	+	845	3498
ENSDARG00000007601	ENSDART00000040235	11	9	9	GCCCCATTACAGCACTGGGGAAGAG	7	+	1413	3498
ENSDARG00000007601	ENSDART00000040235	11	9	9	AACTGCATCTCCGAAGCTGCTTGT	6	+	1236	3498
ENSDARG00000007601	ENSDART00000040235	11	9	9	TTCAGCGCATACTGGATCTGATGGA	7	+	1347	3498
ENSDARG00000007601	ENSDART00000040235	11	9	9	ACATTCGCAAAAAATTTGGAGTC	5	+	1082	3498
ENSDARG00000007601	ENSDART00000040235	11	10	10	AAAACCCCAACCACCGGCAGCATAC	7	+	1543	3498
ENSDARG00000007601	ENSDART00000040235	11	10	10	AACCCCAACCACCGGCAGCATAC	5	+	1545	3498
ENSDARG00000007601	ENSDART00000040235	11	11	11	TGCAAAGCACAGCTCGGTGAGTTC	6	+	1723	3498
ENSDARG00000007601	ENSDART00000040235	11	12	12	GAAAAAGGCAAGAGCTCTGAAGAG	6	+	2119	3498
ENSDARG00000007601	ENSDART00000040235	11	12	12	GTCAAAACCATCAGCAGCTGCTGGT	7	+	1920	3498
ENSDARG00000007601	ENSDART00000040235	11	12	12	AAAGTCAAAACCATCAGCAGCTGCT	7	+	1917	3498
ENSDARG00000007601	ENSDART00000040235	11	12	12	GACACCAGCAAAGAGTCTAGTGC	5	+	1954	3498
ENSDARG00000007601	ENSDART00000040235	11	12	12	GACTCAGACTCTGAGAGGGAGCT	5	+	2176	3498
ENSDARG00000007601	ENSDART00000040235	11	12	12	AAAACCATCAGCAGCTGCTGGTGAG	7	+	1923	3498
ENSDARG00000007601	ENSDART00000040235	11	12	12	ACCATCAGCAGCTGCTGGTGAGGAC	7	+	1926	3498
ENSDARG00000007601	ENSDART00000040235	11	12	12	ACCAACAGCCTCCAAATCTGAAGGT	7	+	2283	3498
ENSDARG00000007601	ENSDART00000040235	11	12	12	ACCATCAGCAGCTGCTGGTGAGGA	6	+	1926	3498
ENSDARG00000007601	ENSDART00000040235	11	13	13	GGCCACACAGGCCCAGGTGTTGAC	6	+	2673	3498
ENSDARG00000007601	ENSDART00000040235	11	13	13	TTCCTCATCTGGACAGCAGGCTTC	6	+	2745	3498
ENSDARG00000007601	ENSDART00000040235	11	16	16	TTCAACATCAGCCACAGCTGGAGAC	7	+	2850	3498
ENSDARG00000007601	ENSDART00000040235	11	16	16	TTCCCACCACCTCTGCAGACGTA	5	+	2882	3498
ENSDARG00000007601	ENSDART00000040235	11	16	16	TCCCACCACCTCTGCAGACGTAGCG	7	+	2883	3498
ENSDARG00000007601	ENSDART00000040235	11	16	16	ACATCAGCCACAGCTGGAGACTTC	6	+	2854	3498
ENSDARG00000007601	ENSDART00000040235	11	16	16	AACATCAGCCACAGCTGGAGACTTC	7	+	2853	3498
ENSDARG00000007601	ENSDART00000040235	11	16	16	CCCACCACCTCTGCAGACGTAGCG	6	+	2884	3498
ENSDARG00000007601	ENSDART00000040235	11	16	16	CACCTCTGCAGACGTAGCGGCTGAC	7	+	2889	3498
ENSDARG00000007601	ENSDART00000040235	11	16	16	CACCACCTCTGCAGACGTAGCGGCT	7	+	2886	3498
ENSDARG00000007601	ENSDART00000040235	11	16	16	AGATTCCCACCACCTCTGCAGAC	5	+	2879	3498
ENSDARG00000007601	ENSDART00000040235	11	19	19	AAAAACAGCAGGCTGTGGATGAA	5	+	3179	3498
ENSDARG00000007601	ENSDART00000040235	11	19	19	AAAAACAGCAGGCTGTGGATGAAAC	7	+	3179	3498
ENSDARG00000007601	ENSDART00000040235	11	20	20	GCAGACAAAGACAGTGAAGTGGAT	6	+	3451	3498
ENSDARG00000007630	ENSDART00000019997	11	2	2	ACACGCTCCTCTCTGGTAGTATTT	6	-	121	1242
ENSDARG00000007630	ENSDART00000019997	11	3	3	GGCTCCTGCACTGCTGCTGCTTCT	6	-	223	1242
ENSDARG00000007630	ENSDART00000019997	11	3	3	CACTGCCACGACCAGGAGGTTTAA	6	-	176	1242
ENSDARG00000007630	ENSDART00000019997	11	8	8	AACGTCCCAGCGGTGGCAGCGGCG	6	-	462	1242
ENSDARG00000007630	ENSDART00000019997	11	8	8	GACGTCTGCTGGAGCTCTGGAAAC	6	-	483	1242
ENSDARG00000007630	ENSDART00000019997	11	9	9	CACACCTTATCCTGACTCTGCTGCA	7	-	695	1242
ENSDARG00000007630	ENSDART00000019997	11	9	9	CGCAGCGCCACTGGCGGATGCAGTT	7	-	811	1242
ENSDARG00000007630	ENSDART00000019997	11	9	9	CTACGCAGCGCCACTGGCGGATGC	6	-	815	1242
ENSDARG00000007630	ENSDART00000019997	11	9	9	CTACGCAGCGCCACTGGCGGATGCA	7	-	814	1242
ENSDARG00000007630	ENSDART00000019997	11	9	9	AACGCCACCATACACTTCTGCAAAC	7	-	641	1242
ENSDARG00000007630	ENSDART00000019997	11	10	10	TCCTCCACCCAGTAGATGCTGGGAA	7	-	902	1242
ENSDARG00000007630	ENSDART00000019997	11	10	10	TCCTCCACCCAGTAGATGCTGGG	5	-	904	1242
ENSDARG00000007630	ENSDART00000019997	11	10	10	GAACTCCTCGATGAGCAGGTTTT	5	-	938	1242
ENSDARG00000007630	ENSDART00000019997	11	10	10	CTCCACCCAGTAGATGCTGGGAA	5	-	902	1242
ENSDARG00000007630	ENSDART00000019997	11	11	11	TCCCTCAGCGCTGAGCTGTTTTC	5	-	1088	1242
ENSDARG00000007630	ENSDART00000019997	11	12	12	GACCTCGTCCTCCAGCTGCGGGA	5	-	1175	1242
ENSDARG00000007630	ENSDART00000104506	11	2	2	ACACGCTCCTCTCTGGTAGTATTT	6	-	115	1125
ENSDARG00000007630	ENSDART00000104506	11	3	3	GGCTCCTGCACTGCTGCTGCTTCT	6	-	217	1125
ENSDARG00000007630	ENSDART00000104506	11	3	3	CACTGCCACGACCAGGAGGTTTAA	6	-	170	1125
ENSDARG00000007630	ENSDART00000104506	11	5	5	GACGTCTGCTGGAGCTCTGGAAAC	6	-	420	1125
ENSDARG00000007630	ENSDART00000104506	11	6	6	CTACGCAGCGCCACTGGCGGATGCA	7	-	751	1125
ENSDARG00000007630	ENSDART00000104506	11	6	6	CTACGCAGCGCCACTGGCGGATGC	6	-	752	1125
ENSDARG00000007630	ENSDART00000104506	11	6	6	CGCAGCGCCACTGGCGGATGCAGTT	7	-	748	1125
ENSDARG00000007630	ENSDART00000104506	11	6	6	CACACCTTATCCTGACTCTGCTGCA	7	-	632	1125
ENSDARG00000007630	ENSDART00000104506	11	6	6	AACGCCACCATACACTTCTGCAAAC	7	-	578	1125
ENSDARG00000007630	ENSDART00000104506	11	7	7	CTCCACCCAGTAGATGCTGGGAA	5	-	839	1125
ENSDARG00000007630	ENSDART00000104506	11	7	7	GAACTCCTCGATGAGCAGGTTTT	5	-	875	1125
ENSDARG00000007630	ENSDART00000104506	11	7	7	TCCTCCACCCAGTAGATGCTGGGAA	7	-	839	1125
ENSDARG00000007630	ENSDART00000104506	11	7	7	TCCTCCACCCAGTAGATGCTGGG	5	-	841	1125
ENSDARG00000007630	ENSDART00000104506	11	8	8	TCCCTCAGCGCTGAGCTGTTTTC	5	-	1025	1125
ENSDARG00000007630	ENSDART00000104506	11	10	10	GACCTCGTCCTCCAGCTGCGGGA	5	-	1115	1125
ENSDARG00000007630	ENSDART00000104511	11	2	2	ACACGCTCCTCTCTGGTAGTATTT	6	-	121	1248
ENSDARG00000007630	ENSDART00000104511	11	3	3	GGCTCCTGCACTGCTGCTGCTTCT	6	-	223	1248
ENSDARG00000007630	ENSDART00000104511	11	3	3	CACTGCCACGACCAGGAGGTTTAA	6	-	176	1248
ENSDARG00000007630	ENSDART00000104511	11	5	5	GCCAGCGTCTATATAATAAGCAGGA	7	-	408	1248
ENSDARG00000007630	ENSDART00000104511	11	6	6	AACGTCCCAGCGGTGGCAGCGGCG	6	-	459	1248
ENSDARG00000007630	ENSDART00000104511	11	6	6	GACGTCTGCTGGAGCTCTGGAAAC	6	-	480	1248
ENSDARG00000007630	ENSDART00000104511	11	7	7	CTACGCAGCGCCACTGGCGGATGCA	7	-	811	1248
ENSDARG00000007630	ENSDART00000104511	11	7	7	CTACGCAGCGCCACTGGCGGATGC	6	-	812	1248
ENSDARG00000007630	ENSDART00000104511	11	7	7	AACGCCACCATACACTTCTGCAAAC	7	-	638	1248
ENSDARG00000007630	ENSDART00000104511	11	7	7	CGCAGCGCCACTGGCGGATGCAGTT	7	-	808	1248
ENSDARG00000007630	ENSDART00000104511	11	7	7	CACACCTTATCCTGACTCTGCTGCA	7	-	692	1248
ENSDARG00000007630	ENSDART00000104511	11	8	8	TCCTCCACCCAGTAGATGCTGGGAA	7	-	899	1248
ENSDARG00000007630	ENSDART00000104511	11	8	8	TCCTCCACCCAGTAGATGCTGGG	5	-	901	1248
ENSDARG00000007630	ENSDART00000104511	11	8	8	GAACTCCTCGATGAGCAGGTTTT	5	-	935	1248
ENSDARG00000007630	ENSDART00000104511	11	8	8	CTCCACCCAGTAGATGCTGGGAA	5	-	899	1248
ENSDARG00000007630	ENSDART00000104511	11	9	9	TCCCTCAGCGCTGAGCTGTTTTC	5	-	1085	1248
ENSDARG00000007630	ENSDART00000104511	11	11	11	GACCTCGTCCTCCAGCTGCGGGA	5	-	1181	1248
ENSDARG00000007630	ENSDART00000104515	11	1	1	GACGTCTGCTGGAGCTCTGGAAAC	6	-	45	474
ENSDARG00000007630	ENSDART00000104515	11	1	1	AACGTCCCAGCGGTGGCAGCGGCG	6	-	24	474
ENSDARG00000007630	ENSDART00000104515	11	2	2	CACACCTTATCCTGACTCTGCTGCA	7	-	257	474
ENSDARG00000007630	ENSDART00000104515	11	2	2	AACGCCACCATACACTTCTGCAAAC	7	-	203	474
ENSDARG00000007630	ENSDART00000104515	11	4	4	GACAGCTGCATGAAGAGTCTGAGTG	7	-	425	474
ENSDARG00000007715	ENSDART00000020256	11	2	2	TTCTCCATCCATGCCTGTTGATGTA	7	-	286	2004
ENSDARG00000007715	ENSDART00000020256	11	2	2	TCCTCCATCCACCTGGTCTGGAAC	6	-	46	2004
ENSDARG00000007715	ENSDART00000020256	11	2	2	GCCACCCTCAGTATTTGACGGGTAA	7	-	327	2004
ENSDARG00000007715	ENSDART00000020256	11	2	2	GAACGCCACCCTCAGTATTTGAC	5	-	333	2004
ENSDARG00000007715	ENSDART00000020256	11	2	2	AACGCCACCCTCAGTATTTGACGGG	7	-	330	2004
ENSDARG00000007715	ENSDART00000020256	11	3	3	CTCGACATCAGAAATGAAGCTTTG	6	-	700	2004
ENSDARG00000007715	ENSDART00000020256	11	3	3	GACATCAGAAATGAAGCTTTGGGA	6	-	697	2004
ENSDARG00000007715	ENSDART00000020256	11	4	4	ATCTTCACATTAAAGTCGCAGCT	5	-	1663	2004
ENSDARG00000007715	ENSDART00000020256	11	4	4	TGCCAACACAATGTAAGGGTTTGCC	7	-	1734	2004
ENSDARG00000007715	ENSDART00000020256	11	4	4	TCCTGCTGCTATAGTGGCTGCCAAC	7	-	1752	2004
ENSDARG00000007715	ENSDART00000020256	11	4	4	AGAATCCCATGCTCTGGAGCTGTC	6	-	1079	2004
ENSDARG00000007715	ENSDART00000020256	11	4	4	GTCAACTTCATTGATTTGGGGGC	5	-	887	2004
ENSDARG00000007715	ENSDART00000020256	11	4	4	AGAGGCAGCTCAAAGCGGCAGAA	5	-	1548	2004
ENSDARG00000007715	ENSDART00000020256	11	4	4	GCCAACACAATGTAAGGGTTTGCC	6	-	1734	2004
ENSDARG00000007715	ENSDART00000020256	11	4	4	AGCGGCAGAATGATGGAGAAGAC	5	-	1535	2004
ENSDARG00000007715	ENSDART00000020256	11	4	4	CAAAGCGGCAGAATGATGGAGAA	5	-	1538	2004
ENSDARG00000007824	ENSDART00000046663	11	2	2	CGCTCCTCCTTGTTGTGGGAGGCA	6	-	201	714
ENSDARG00000007824	ENSDART00000046663	11	2	2	CGCTCCTCCTTGTTGTGGGAGGC	5	-	202	714
ENSDARG00000007824	ENSDART00000046663	11	3	3	TCCTGCTGCTCCCGAAGTGGCCGAC	7	-	317	714
ENSDARG00000007824	ENSDART00000046663	11	4	4	CACGGCTGCCTTGCGACTTTGCT	5	-	470	714
ENSDARG00000007824	ENSDART00000046663	11	4	4	AACTTCTTCTGTTCGTGGTAGCT	5	-	445	714
ENSDARG00000007824	ENSDART00000046663	11	4	4	TGCTGCACCAGTGCAGCTGCAGTG	6	-	555	714
ENSDARG00000007824	ENSDART00000046663	11	5	5	CACCGCAGCAGAAAGCGCATGATTT	7	-	629	714
ENSDARG00000007894	ENSDART00000013092	11	2	2	GAAGACTTCATTCGTGCCTTTGAA	6	+	199	3828
ENSDARG00000007894	ENSDART00000013092	11	3	3	GAAAAACACGACTGGGAGCAGAG	5	+	301	3828
ENSDARG00000007894	ENSDART00000013092	11	4	4	TGCGGCAGCTGGACGCAGCTTTC	5	+	398	3828
ENSDARG00000007894	ENSDART00000013092	11	5	5	AGCCACTGCTGACAGATGCTGAC	5	+	521	3828
ENSDARG00000007894	ENSDART00000013092	11	7	7	CACTCATTATCCTCGTCTGATTC	5	+	600	3828
ENSDARG00000007894	ENSDART00000013092	11	8	8	GCAAACTACTGCTTTGGAGAGGTG	6	+	708	3828
ENSDARG00000007894	ENSDART00000013092	11	8	8	AACCACAGACGCTGCTTTGAGTTT	6	+	661	3828
ENSDARG00000007894	ENSDART00000013092	11	11	11	ACACCCGCCGCCAGCAGCCTGAGCA	7	+	994	3828
ENSDARG00000007894	ENSDART00000013092	11	11	11	GCCGCCAGCAGCCTGAGCAGGGGTA	7	+	1000	3828
ENSDARG00000007894	ENSDART00000013092	11	11	11	CTCCACAGCCGCCCGACGACTGC	5	+	967	3828
ENSDARG00000007894	ENSDART00000013092	11	11	11	ACCCGCCGCCAGCAGCCTGAGCA	5	+	996	3828
ENSDARG00000007894	ENSDART00000013092	11	12	12	GTTCTCGCAGTGATGTGGATGTG	5	+	1070	3828
ENSDARG00000007894	ENSDART00000013092	11	13	13	GACGCCAGAGTTCAGAGACGCCGAC	7	+	1208	3828
ENSDARG00000007894	ENSDART00000013092	11	13	13	GACGCCGACTGGAGGCGGAGCGTCT	7	+	1224	3828
ENSDARG00000007894	ENSDART00000013092	11	13	13	CTCCCAATCACAGCGTGAGTTTGGG	7	+	1287	3828
ENSDARG00000007894	ENSDART00000013092	11	13	13	AGAGACGCCGACTGGAGGCGGAG	5	+	1221	3828
ENSDARG00000007894	ENSDART00000013092	11	13	13	TGCCTCCCAATCACAGCGTGAGTT	6	+	1284	3828
ENSDARG00000007894	ENSDART00000013092	11	13	13	AGAGACGCCGACTGGAGGCGGAGCG	7	+	1221	3828
ENSDARG00000007894	ENSDART00000013092	11	14	14	TCCCTCGCAGTCAAGGCTGCAGTC	6	+	1418	3828
ENSDARG00000007894	ENSDART00000013092	11	16	16	AACACCGGCACAGAGGTGGAGGCG	6	+	1645	3828
ENSDARG00000007894	ENSDART00000013092	11	16	16	ACCGGCACAGAGGTGGAGGCGGC	5	+	1648	3828
ENSDARG00000007894	ENSDART00000013092	11	16	16	ACCGGCACAGAGGTGGAGGCGGCG	6	+	1648	3828
ENSDARG00000007894	ENSDART00000013092	11	16	16	AACACCGGCACAGAGGTGGAGGC	5	+	1645	3828
ENSDARG00000007894	ENSDART00000013092	11	17	17	TGCGCCAGACAGAGGACGTGGCG	5	+	1817	3828
ENSDARG00000007894	ENSDART00000013092	11	17	17	ACCTGCGCCAGACAGAGGACGTG	5	+	1814	3828
ENSDARG00000007894	ENSDART00000013092	11	18	18	GAAATCTTCACCAGGATGTTTGC	5	+	1960	3828
ENSDARG00000007894	ENSDART00000013092	11	19	19	ACATACACAAATGTTCTGTAGTT	5	+	2263	3828
ENSDARG00000007894	ENSDART00000013092	11	19	19	ATCCTCCTCACACAGCTGCTGAA	5	+	2077	3828
ENSDARG00000007894	ENSDART00000013092	11	19	19	TCCTCACACAGCTGCTGAAGAAGAC	7	+	2081	3828
ENSDARG00000007894	ENSDART00000013092	11	19	19	CTCCTCACACAGCTGCTGAAGAA	5	+	2080	3828
ENSDARG00000007894	ENSDART00000013092	11	19	19	CTCTGCACAGAGAGGATCTGCAGGA	7	+	2042	3828
ENSDARG00000007894	ENSDART00000013092	11	19	19	CACAGCTGCTGAAGAAGACGGGGGT	7	+	2087	3828
ENSDARG00000007894	ENSDART00000013092	11	20	20	AGCTCCTCCCACAGTGATGCTGAT	6	+	2389	3828
ENSDARG00000007894	ENSDART00000013092	11	21	21	CTCTTCCTCTCCCCTTTGTCTGC	5	+	2443	3828
ENSDARG00000007894	ENSDART00000013092	11	22	22	TGCTCAGTCGTTTGTGGGGCTGGA	6	+	2672	3828
ENSDARG00000007894	ENSDART00000013092	11	22	22	CTCCGCTACACCCCCTCTGCGGGC	6	+	2736	3828
ENSDARG00000007894	ENSDART00000013092	11	24	24	GTTGTCATCTGCTATGATGGAGGG	6	+	2925	3828
ENSDARG00000007894	ENSDART00000013092	11	24	24	GTCATCTGCTATGATGGAGGGCGGC	7	+	2928	3828
ENSDARG00000007894	ENSDART00000013092	11	24	24	GCCGTCTCCTCGACCGTGGATGAG	6	+	2991	3828
ENSDARG00000007894	ENSDART00000013092	11	24	24	GACTCCATCAGCGCGTATGAGAA	5	+	3040	3828
ENSDARG00000007894	ENSDART00000013092	11	25	25	GGCAGCAGCTGGAGCTGGTTGGTG	6	+	3113	3828
ENSDARG00000007894	ENSDART00000013092	11	25	25	TACTGCTGCTCCTGGAGACGCTGGG	7	+	3263	3828
ENSDARG00000007894	ENSDART00000013092	11	25	25	GGCCACGGCAGCAGCTGGAGCTGGT	7	+	3107	3828
ENSDARG00000007894	ENSDART00000013092	11	26	26	CACACCGTCCGAGCGCTGGCTCT	5	+	3298	3828
ENSDARG00000007894	ENSDART00000085978	11	2	2	GAAGACTTCATTCGTGCCTTTGAA	6	+	199	3696
ENSDARG00000007894	ENSDART00000085978	11	3	3	GAAAAACACGACTGGGAGCAGAG	5	+	301	3696
ENSDARG00000007894	ENSDART00000085978	11	4	4	TGCGGCAGCTGGACGCAGCTTTC	5	+	398	3696
ENSDARG00000007894	ENSDART00000085978	11	5	5	AGCCACTGCTGACAGATGCTGAC	5	+	521	3696
ENSDARG00000007894	ENSDART00000085978	11	7	7	CACTCATTATCCTCGTCTGATTC	5	+	600	3696
ENSDARG00000007894	ENSDART00000085978	11	8	8	GCAAACTACTGCTTTGGAGAGGTG	6	+	708	3696
ENSDARG00000007894	ENSDART00000085978	11	8	8	AACCACAGACGCTGCTTTGAGTTT	6	+	661	3696
ENSDARG00000007894	ENSDART00000085978	11	11	11	ACCCGCCGCCAGCAGCCTGAGCA	5	+	996	3696
ENSDARG00000007894	ENSDART00000085978	11	11	11	CTCCACAGCCGCCCGACGACTGC	5	+	967	3696
ENSDARG00000007894	ENSDART00000085978	11	11	11	GCCGCCAGCAGCCTGAGCAGGGGTA	7	+	1000	3696
ENSDARG00000007894	ENSDART00000085978	11	11	11	ACACCCGCCGCCAGCAGCCTGAGCA	7	+	994	3696
ENSDARG00000007894	ENSDART00000085978	11	12	12	GTTCTCGCAGTGATGTGGATGTG	5	+	1070	3696
ENSDARG00000007894	ENSDART00000085978	11	13	13	AGAGACGCCGACTGGAGGCGGAGCG	7	+	1221	3696
ENSDARG00000007894	ENSDART00000085978	11	13	13	CTCCCAATCACAGCGTGAGTTTGGG	7	+	1287	3696
ENSDARG00000007894	ENSDART00000085978	11	13	13	GACGCCAGAGTTCAGAGACGCCGAC	7	+	1208	3696
ENSDARG00000007894	ENSDART00000085978	11	13	13	GACGCCGACTGGAGGCGGAGCGTCT	7	+	1224	3696
ENSDARG00000007894	ENSDART00000085978	11	13	13	TGCCTCCCAATCACAGCGTGAGTT	6	+	1284	3696
ENSDARG00000007894	ENSDART00000085978	11	13	13	AGAGACGCCGACTGGAGGCGGAG	5	+	1221	3696
ENSDARG00000007894	ENSDART00000085978	11	14	14	TCCCTCGCAGTCAAGGCTGCAGTC	6	+	1418	3696
ENSDARG00000007894	ENSDART00000085978	11	15	15	AACACCGGCACAGAGGTGGAGGC	5	+	1534	3696
ENSDARG00000007894	ENSDART00000085978	11	15	15	ACCGGCACAGAGGTGGAGGCGGC	5	+	1537	3696
ENSDARG00000007894	ENSDART00000085978	11	15	15	ACCGGCACAGAGGTGGAGGCGGCG	6	+	1537	3696
ENSDARG00000007894	ENSDART00000085978	11	15	15	AACACCGGCACAGAGGTGGAGGCG	6	+	1534	3696
ENSDARG00000007894	ENSDART00000085978	11	17	17	ACCTGCGCCAGACAGAGGACGTG	5	+	1727	3696
ENSDARG00000007894	ENSDART00000085978	11	17	17	TGCGCCAGACAGAGGACGTGGCG	5	+	1730	3696
ENSDARG00000007894	ENSDART00000085978	11	18	18	GAAATCTTCACCAGGATGTTTGC	5	+	1873	3696
ENSDARG00000007894	ENSDART00000085978	11	20	20	TCCTCACACAGCTGCTGAAGAAGAC	7	+	2063	3696
ENSDARG00000007894	ENSDART00000085978	11	20	20	ATCCTCCTCACACAGCTGCTGAA	5	+	2059	3696
ENSDARG00000007894	ENSDART00000085978	11	20	20	ACATACACAAATGTTCTGTAGTT	5	+	2245	3696
ENSDARG00000007894	ENSDART00000085978	11	20	20	CTCTGCACAGAGAGGATCTGCAGGA	7	+	2024	3696
ENSDARG00000007894	ENSDART00000085978	11	20	20	CACAGCTGCTGAAGAAGACGGGGGT	7	+	2069	3696
ENSDARG00000007894	ENSDART00000085978	11	20	20	CTCCTCACACAGCTGCTGAAGAA	5	+	2062	3696
ENSDARG00000007894	ENSDART00000085978	11	21	21	AGCTCCTCCCACAGTGATGCTGAT	6	+	2371	3696
ENSDARG00000007894	ENSDART00000085978	11	22	22	CTCTTCCTCTCCCCTTTGTCTGC	5	+	2425	3696
ENSDARG00000007894	ENSDART00000085978	11	23	23	CTCCGCTACACCCCCTCTGCGGGC	6	+	2604	3696
ENSDARG00000007894	ENSDART00000085978	11	25	25	GTTGTCATCTGCTATGATGGAGGG	6	+	2793	3696
ENSDARG00000007894	ENSDART00000085978	11	25	25	GTCATCTGCTATGATGGAGGGCGGC	7	+	2796	3696
ENSDARG00000007894	ENSDART00000085978	11	25	25	GCCGTCTCCTCGACCGTGGATGAG	6	+	2859	3696
ENSDARG00000007894	ENSDART00000085978	11	25	25	GACTCCATCAGCGCGTATGAGAA	5	+	2908	3696
ENSDARG00000007894	ENSDART00000085978	11	26	26	TACTGCTGCTCCTGGAGACGCTGGG	7	+	3131	3696
ENSDARG00000007894	ENSDART00000085978	11	26	26	GGCCACGGCAGCAGCTGGAGCTGGT	7	+	2975	3696
ENSDARG00000007894	ENSDART00000085978	11	26	26	GGCAGCAGCTGGAGCTGGTTGGTG	6	+	2981	3696
ENSDARG00000007894	ENSDART00000085978	11	27	27	CACACCGTCCGAGCGCTGGCTCT	5	+	3166	3696
ENSDARG00000007894	ENSDART00000102445	11	2	2	GAAGACTTCATTCGTGCCTTTGAA	6	+	208	3789
ENSDARG00000007894	ENSDART00000102445	11	3	3	GAAAAACACGACTGGGAGCAGAG	5	+	310	3789
ENSDARG00000007894	ENSDART00000102445	11	4	4	TGCGGCAGCTGGACGCAGCTTTC	5	+	407	3789
ENSDARG00000007894	ENSDART00000102445	11	9	9	CACTCATTATCCTCGTCTGATTC	5	+	621	3789
ENSDARG00000007894	ENSDART00000102445	11	10	10	AACCACAGACGCTGCTTTGAGTTT	6	+	682	3789
ENSDARG00000007894	ENSDART00000102445	11	10	10	GCAAACTACTGCTTTGGAGAGGTG	6	+	729	3789
ENSDARG00000007894	ENSDART00000102445	11	13	13	ACACCCGCCGCCAGCAGCCTGAGCA	7	+	1015	3789
ENSDARG00000007894	ENSDART00000102445	11	13	13	CTCCACAGCCGCCCGACGACTGC	5	+	988	3789
ENSDARG00000007894	ENSDART00000102445	11	13	13	GCCGCCAGCAGCCTGAGCAGGGGTA	7	+	1021	3789
ENSDARG00000007894	ENSDART00000102445	11	13	13	ACCCGCCGCCAGCAGCCTGAGCA	5	+	1017	3789
ENSDARG00000007894	ENSDART00000102445	11	14	14	GTTCTCGCAGTGATGTGGATGTG	5	+	1091	3789
ENSDARG00000007894	ENSDART00000102445	11	15	15	AGACGCTGCCGGTAATGTGGAGGG	6	+	1215	3789
ENSDARG00000007894	ENSDART00000102445	11	15	15	AGACGCTGCCGGTAATGTGGAGGGT	7	+	1215	3789
ENSDARG00000007894	ENSDART00000102445	11	16	16	TGCCTCCCAATCACAGCGTGAGTT	6	+	1344	3789
ENSDARG00000007894	ENSDART00000102445	11	16	16	AGAGACGCCGACTGGAGGCGGAGCG	7	+	1281	3789
ENSDARG00000007894	ENSDART00000102445	11	16	16	AGAGACGCCGACTGGAGGCGGAG	5	+	1281	3789
ENSDARG00000007894	ENSDART00000102445	11	16	16	GACGCCAGAGTTCAGAGACGCCGAC	7	+	1268	3789
ENSDARG00000007894	ENSDART00000102445	11	16	16	GACGCCGACTGGAGGCGGAGCGTCT	7	+	1284	3789
ENSDARG00000007894	ENSDART00000102445	11	17	17	TCCCTCGCAGTCAAGGCTGCAGTC	6	+	1451	3789
ENSDARG00000007894	ENSDART00000102445	11	20	20	AACACCGGCACAGAGGTGGAGGCG	6	+	1738	3789
ENSDARG00000007894	ENSDART00000102445	11	20	20	AACACCGGCACAGAGGTGGAGGC	5	+	1738	3789
ENSDARG00000007894	ENSDART00000102445	11	20	20	ACCGGCACAGAGGTGGAGGCGGCG	6	+	1741	3789
ENSDARG00000007894	ENSDART00000102445	11	20	20	ACCGGCACAGAGGTGGAGGCGGC	5	+	1741	3789
ENSDARG00000007894	ENSDART00000102445	11	21	21	TGCGCCAGACAGAGGACGTGGCG	5	+	1910	3789
ENSDARG00000007894	ENSDART00000102445	11	21	21	ACCTGCGCCAGACAGAGGACGTG	5	+	1907	3789
ENSDARG00000007894	ENSDART00000102445	11	22	22	GAAATCTTCACCAGGATGTTTGC	5	+	2053	3789
ENSDARG00000007894	ENSDART00000102445	11	23	23	TCCTCACACAGCTGCTGAAGAAGAC	7	+	2174	3789
ENSDARG00000007894	ENSDART00000102445	11	23	23	ATCCTCCTCACACAGCTGCTGAA	5	+	2170	3789
ENSDARG00000007894	ENSDART00000102445	11	23	23	CTCTGCACAGAGAGGATCTGCAGGA	7	+	2135	3789
ENSDARG00000007894	ENSDART00000102445	11	23	23	CTCCTCACACAGCTGCTGAAGAA	5	+	2173	3789
ENSDARG00000007894	ENSDART00000102445	11	23	23	CACAGCTGCTGAAGAAGACGGGGGT	7	+	2180	3789
ENSDARG00000007894	ENSDART00000102445	11	24	24	ACATACACAAATGTTCTGTAGTT	5	+	2263	3789
ENSDARG00000007894	ENSDART00000102445	11	27	27	AGCTCCTCCCACAGTGATGCTGAT	6	+	2455	3789
ENSDARG00000007894	ENSDART00000102445	11	28	28	TTCTTCCTCTCCTCTTTGTCTGC	5	+	2501	3789
ENSDARG00000007894	ENSDART00000102445	11	28	28	CTCCGCTACACCCCCTCTGCGGGC	6	+	2694	3789
ENSDARG00000007894	ENSDART00000102445	11	28	28	TGCTCAGTCGTTTGTGGGGCTGGA	6	+	2630	3789
ENSDARG00000007894	ENSDART00000102445	11	30	30	GTTGTCATCTGCTATGATGGAGGG	6	+	2883	3789
ENSDARG00000007894	ENSDART00000102445	11	30	30	GTCATCTGCTATGATGGAGGGCGGC	7	+	2886	3789
ENSDARG00000007894	ENSDART00000102445	11	30	30	GCCGTCTCCTCGACCGTGGATGAG	6	+	2949	3789
ENSDARG00000007894	ENSDART00000102445	11	30	30	GACTCCATCAGCGCGTATGAGAA	5	+	2998	3789
ENSDARG00000007894	ENSDART00000102445	11	32	32	GGCAGCAGCTGGAGCTGGTTGGTG	6	+	3074	3789
ENSDARG00000007894	ENSDART00000102445	11	32	32	TACTGCTGCTCCTGGAGACGCTGGG	7	+	3224	3789
ENSDARG00000007894	ENSDART00000102445	11	32	32	GGCCACGGCAGCAGCTGGAGCTGGT	7	+	3068	3789
ENSDARG00000007894	ENSDART00000102445	11	33	33	CACACCGTCCGAGCGCTGGCTCT	5	+	3259	3789
ENSDARG00000007894	ENSDART00000102449	11	3	3	GAAGACTTCATTCGTGCCTTTGAA	6	+	229	3840
ENSDARG00000007894	ENSDART00000102449	11	4	4	GAAAAACACGACTGGGAGCAGAG	5	+	331	3840
ENSDARG00000007894	ENSDART00000102449	11	5	5	TGCGGCAGCTGGACGCAGCTTTC	5	+	428	3840
ENSDARG00000007894	ENSDART00000102449	11	10	10	CACTCATTATCCTCGTCTGATTC	5	+	642	3840
ENSDARG00000007894	ENSDART00000102449	11	11	11	AACCACAGACGCTGCTTTGAGTTT	6	+	703	3840
ENSDARG00000007894	ENSDART00000102449	11	11	11	GCAAACTACTGCTTTGGAGAGGTG	6	+	750	3840
ENSDARG00000007894	ENSDART00000102449	11	14	14	CTCCACAGCCGCCCGACGACTGC	5	+	1009	3840
ENSDARG00000007894	ENSDART00000102449	11	14	14	GCCGCCAGCAGCCTGAGCAGGGGTA	7	+	1042	3840
ENSDARG00000007894	ENSDART00000102449	11	14	14	ACCCGCCGCCAGCAGCCTGAGCA	5	+	1038	3840
ENSDARG00000007894	ENSDART00000102449	11	14	14	ACACCCGCCGCCAGCAGCCTGAGCA	7	+	1036	3840
ENSDARG00000007894	ENSDART00000102449	11	15	15	GTTCTCGCAGTGATGTGGATGTG	5	+	1112	3840
ENSDARG00000007894	ENSDART00000102449	11	18	18	AGAGACGCCGACTGGAGGCGGAGCG	7	+	1305	3840
ENSDARG00000007894	ENSDART00000102449	11	18	18	GACGCCGACTGGAGGCGGAGCGTCT	7	+	1308	3840
ENSDARG00000007894	ENSDART00000102449	11	18	18	GACGCCAGAGTTCAGAGACGCCGAC	7	+	1292	3840
ENSDARG00000007894	ENSDART00000102449	11	18	18	TGCCTCCCAATCACAGCGTGAGTT	6	+	1368	3840
ENSDARG00000007894	ENSDART00000102449	11	18	18	AGAGACGCCGACTGGAGGCGGAG	5	+	1305	3840
ENSDARG00000007894	ENSDART00000102449	11	20	20	TCCCTCGCAGTCAAGGCTGCAGTC	6	+	1529	3840
ENSDARG00000007894	ENSDART00000102449	11	22	22	AACACCGGCACAGAGGTGGAGGC	5	+	1768	3840
ENSDARG00000007894	ENSDART00000102449	11	22	22	ACCGGCACAGAGGTGGAGGCGGCG	6	+	1771	3840
ENSDARG00000007894	ENSDART00000102449	11	22	22	ACCGGCACAGAGGTGGAGGCGGC	5	+	1771	3840
ENSDARG00000007894	ENSDART00000102449	11	22	22	AACACCGGCACAGAGGTGGAGGCG	6	+	1768	3840
ENSDARG00000007894	ENSDART00000102449	11	24	24	ACCTGCGCCAGACAGAGGACGTG	5	+	1961	3840
ENSDARG00000007894	ENSDART00000102449	11	24	24	TGCGCCAGACAGAGGACGTGGCG	5	+	1964	3840
ENSDARG00000007894	ENSDART00000102449	11	25	25	GAAATCTTCACCAGGATGTTTGC	5	+	2107	3840
ENSDARG00000007894	ENSDART00000102449	11	26	26	ATCCTCCTCACACAGCTGCTGAA	5	+	2221	3840
ENSDARG00000007894	ENSDART00000102449	11	26	26	CACAGCTGCTGAAGAAGACGGGGGT	7	+	2231	3840
ENSDARG00000007894	ENSDART00000102449	11	26	26	CTCTGCACAGAGAGGATCTGCAGGA	7	+	2186	3840
ENSDARG00000007894	ENSDART00000102449	11	26	26	CTCCTCACACAGCTGCTGAAGAA	5	+	2224	3840
ENSDARG00000007894	ENSDART00000102449	11	26	26	TCCTCACACAGCTGCTGAAGAAGAC	7	+	2225	3840
ENSDARG00000007894	ENSDART00000102449	11	27	27	ACATACACAAATGTTCTGTAGTT	5	+	2314	3840
ENSDARG00000007894	ENSDART00000102449	11	30	30	AGCTCCTCCCACAGTGATGCTGAT	6	+	2506	3840
ENSDARG00000007894	ENSDART00000102449	11	31	31	CTCCGCTACACCCCCTCTGCGGGC	6	+	2745	3840
ENSDARG00000007894	ENSDART00000102449	11	31	31	TTCTTCCTCTCCTCTTTGTCTGC	5	+	2552	3840
ENSDARG00000007894	ENSDART00000102449	11	31	31	TGCTCAGTCGTTTGTGGGGCTGGA	6	+	2681	3840
ENSDARG00000007894	ENSDART00000102449	11	33	33	GTTGTCATCTGCTATGATGGAGGG	6	+	2934	3840
ENSDARG00000007894	ENSDART00000102449	11	33	33	GTCATCTGCTATGATGGAGGGCGGC	7	+	2937	3840
ENSDARG00000007894	ENSDART00000102449	11	33	33	GCCGTCTCCTCGACCGTGGATGAG	6	+	3000	3840
ENSDARG00000007894	ENSDART00000102449	11	33	33	GACTCCATCAGCGCGTATGAGAA	5	+	3049	3840
ENSDARG00000007894	ENSDART00000102449	11	35	35	TACTGCTGCTCCTGGAGACGCTGGG	7	+	3275	3840
ENSDARG00000007894	ENSDART00000102449	11	35	35	GGCCACGGCAGCAGCTGGAGCTGGT	7	+	3119	3840
ENSDARG00000007894	ENSDART00000102449	11	35	35	GGCAGCAGCTGGAGCTGGTTGGTG	6	+	3125	3840
ENSDARG00000007894	ENSDART00000102449	11	36	36	CACACCGTCCGAGCGCTGGCTCT	5	+	3310	3840
ENSDARG00000007955	ENSDART00000004423	11	2	2	CTCGCCTACCTTCAGCCGCCGGC	5	-	209	1797
ENSDARG00000007955	ENSDART00000004423	11	4	4	TCCTTCTCCTCCACTGCTGCCGGG	6	-	360	1797
ENSDARG00000007955	ENSDART00000004423	11	5	5	AGAGTCTTCCTGTCTCTGATTAC	5	-	493	1797
ENSDARG00000007955	ENSDART00000004423	11	5	5	AAACTCACCTTGATGGGCAGAGTCT	7	-	509	1797
ENSDARG00000007955	ENSDART00000004423	11	7	7	AAAGGCTCCTTTCAGCCGTTTGC	5	-	698	1797
ENSDARG00000007955	ENSDART00000004423	11	9	9	ACCTTCTTACGCAGTTTCTGGATGC	7	-	971	1797
ENSDARG00000007955	ENSDART00000004423	11	10	10	TTCTCCTGCACGATGACGCTGGC	5	-	1141	1797
ENSDARG00000007955	ENSDART00000004423	11	11	11	CCCTGCAGACGGAGGAAGAGGAG	5	-	1212	1797
ENSDARG00000007955	ENSDART00000004423	11	13	13	CACAGCAGAGACTCGGAGCTGCT	5	-	1513	1797
ENSDARG00000007955	ENSDART00000004423	11	13	13	CGCACCTGCAGGACTGGCGTTGAC	6	-	1558	1797
ENSDARG00000007955	ENSDART00000004423	11	15	15	AGAGTCTTCATAGAGGACGCCTTC	6	-	1734	1797
ENSDARG00000007955	ENSDART00000104646	11	1	1	TCCTTCTCCTCCACTGCTGCCGGG	6	-	33	1473
ENSDARG00000007955	ENSDART00000104646	11	2	2	AAACTCACCTTGATGGGCAGAGTCT	7	-	182	1473
ENSDARG00000007955	ENSDART00000104646	11	2	2	AGAGTCTTCCTGTCTCTGATTAC	5	-	166	1473
ENSDARG00000007955	ENSDART00000104646	11	4	4	AAAGGCTCCTTTCAGCCGTTTGC	5	-	371	1473
ENSDARG00000007955	ENSDART00000104646	11	6	6	ACCTTCTTACGCAGTTTCTGGATGC	7	-	644	1473
ENSDARG00000007955	ENSDART00000104646	11	7	7	TTCTCCTGCACGATGACGCTGGC	5	-	814	1473
ENSDARG00000007955	ENSDART00000104646	11	9	9	CCCTGCAGACGGAGGAAGAGGAG	5	-	891	1473
ENSDARG00000007955	ENSDART00000104646	11	11	11	CACAGCAGAGACTCGGAGCTGCT	5	-	1192	1473
ENSDARG00000007955	ENSDART00000104646	11	11	11	CGCACCTGCAGGACTGGCGTTGAC	6	-	1237	1473
ENSDARG00000007955	ENSDART00000104646	11	13	13	AGAGTCTTCATAGAGGACGCCTTC	6	-	1410	1473
ENSDARG00000008034	ENSDART00000027575	11	1	1	GAAGGCTGCCGGTCCGCCGAGGGA	6	-	94	2139
ENSDARG00000008034	ENSDART00000027575	11	1	1	CTCGGCGTCTGTTTGTGTGATGAG	6	-	478	2139
ENSDARG00000008034	ENSDART00000027575	11	1	1	GCACGCCGCGTTGGGGCTGGTGTA	6	-	655	2139
ENSDARG00000008034	ENSDART00000027575	11	1	1	GCACGCCGCGTTGGGGCTGGTGT	5	-	656	2139
ENSDARG00000008034	ENSDART00000027575	11	1	1	GCACACAGAGTTGATCTGCTGGA	5	-	359	2139
ENSDARG00000008034	ENSDART00000027575	11	1	1	CGCTCCAGCTCAATGGAGCAGGA	5	-	562	2139
ENSDARG00000008034	ENSDART00000027575	11	2	2	GAAACCAACCTTGTTAGCAGAAGCC	7	-	1014	2139
ENSDARG00000008034	ENSDART00000027575	11	2	2	AAACCAACCTTGTTAGCAGAAGCC	6	-	1014	2139
ENSDARG00000008034	ENSDART00000027575	11	3	3	CTCTCATACTTGTGATTGGGAGTCT	7	-	1109	2139
ENSDARG00000008034	ENSDART00000027575	11	4	4	TTCTCCTGCAGCCGCTGTTTGATTG	7	-	1343	2139
ENSDARG00000008034	ENSDART00000027575	11	4	4	CTCTCCGTCTTGCCTGTGTTGTG	5	-	1246	2139
ENSDARG00000008034	ENSDART00000027575	11	6	6	CACCTCTGCAGAGCTGTGAGGGC	5	-	1526	2139
ENSDARG00000008034	ENSDART00000027575	11	6	6	CACCCCGACACCATTGGTGAAGGG	6	-	1492	2139
ENSDARG00000008034	ENSDART00000027575	11	6	6	CACACCTGCTGCAGGCTGCGTTT	5	-	1717	2139
ENSDARG00000008034	ENSDART00000027575	11	6	6	ACCTGCTGCAGGCTGCGTTTGGC	5	-	1714	2139
ENSDARG00000008034	ENSDART00000027575	11	7	7	TTCTCACACTCCACACGGAGGCGCT	7	-	1817	2139
ENSDARG00000008034	ENSDART00000027575	11	7	7	TCCCTCTTCAGCCTGTCGCAGGA	5	-	1864	2139
ENSDARG00000008034	ENSDART00000027575	11	8	8	TTAGCCTCCGTTTCTGCTTTGTG	5	-	2098	2139
ENSDARG00000008034	ENSDART00000027575	11	8	8	GTTAGCCTCCGTTTCTGCTTTGTG	6	-	2098	2139
ENSDARG00000008034	ENSDART00000027575	11	8	8	GTCCACTTCTGCCTGCTGGAGCT	5	-	1985	2139
ENSDARG00000008034	ENSDART00000103549	11	1	1	GAAGGCTGCCGGTCCGCCGAGGGA	6	-	88	2085
ENSDARG00000008034	ENSDART00000103549	11	1	1	CTCGGCGTCTGTTTGTGTGATGAG	6	-	472	2085
ENSDARG00000008034	ENSDART00000103549	11	1	1	GCACGCCGCGTTGGGGCTGGTGTA	6	-	649	2085
ENSDARG00000008034	ENSDART00000103549	11	1	1	GCACGCCGCGTTGGGGCTGGTGT	5	-	650	2085
ENSDARG00000008034	ENSDART00000103549	11	1	1	GCACACAGAGTTGATCTGCTGGA	5	-	353	2085
ENSDARG00000008034	ENSDART00000103549	11	1	1	CGCTCCAGCTCAATGGAGCAGGA	5	-	556	2085
ENSDARG00000008034	ENSDART00000103549	11	2	2	AAACCAACCTTGTTAGCAGAAGCC	6	-	1005	2085
ENSDARG00000008034	ENSDART00000103549	11	2	2	GAAACCAACCTTGTTAGCAGAAGCC	7	-	1005	2085
ENSDARG00000008034	ENSDART00000103549	11	3	3	CTCTCATACTTGTGATTGGGAGTCT	7	-	1100	2085
ENSDARG00000008034	ENSDART00000103549	11	4	4	TTCTCCTGCAGCCGCTGTTTGATTG	7	-	1334	2085
ENSDARG00000008034	ENSDART00000103549	11	4	4	CTCTCCGTCTTGCCTGTGTTGTG	5	-	1237	2085
ENSDARG00000008034	ENSDART00000103549	11	5	5	CACCTCTGCAGAGCTGTGAGGGC	5	-	1466	2085
ENSDARG00000008034	ENSDART00000103549	11	5	5	CACCCCGACACCATTGGTGAAGGG	6	-	1432	2085
ENSDARG00000008034	ENSDART00000103549	11	5	5	CACACCTGCTGCAGGCTGCGTTT	5	-	1657	2085
ENSDARG00000008034	ENSDART00000103549	11	5	5	ACCTGCTGCAGGCTGCGTTTGGC	5	-	1654	2085
ENSDARG00000008034	ENSDART00000103549	11	6	6	TTCTCACACTCCACACGGAGGCGCT	7	-	1757	2085
ENSDARG00000008034	ENSDART00000103549	11	6	6	TCCCTCTTCAGCCTGTCGCAGGA	5	-	1804	2085
ENSDARG00000008034	ENSDART00000103549	11	7	7	TTAGCCTCCGTTTCTGCTTTGTG	5	-	2038	2085
ENSDARG00000008034	ENSDART00000103549	11	7	7	GTTAGCCTCCGTTTCTGCTTTGTG	6	-	2038	2085
ENSDARG00000008034	ENSDART00000103549	11	7	7	GTCCACTTCTGCCTGCTGGAGCT	5	-	1925	2085
ENSDARG00000008473	ENSDART00000019008	11	1	1	TTCCTCAGAGAAACAGCGTTGGTG	6	-	43	1593
ENSDARG00000008473	ENSDART00000019008	11	2	2	TACTGCTAAGAAGAGCGCCGTTTTC	7	-	183	1593
ENSDARG00000008473	ENSDART00000019008	11	2	2	CGCGTCTTCAGGAGACGCTGTTGAA	7	-	135	1593
ENSDARG00000008473	ENSDART00000019008	11	3	3	AAAGCCAGCGGTGTGAGGCCGAA	5	-	475	1593
ENSDARG00000008473	ENSDART00000019008	11	4	4	GCAAGCCTCAAACAAGATGGTTGC	6	-	580	1593
ENSDARG00000008473	ENSDART00000019008	11	5	5	GGCGGCGGCTGAATGAAGAGGAC	5	-	779	1593
ENSDARG00000008473	ENSDART00000019008	11	5	5	CACTGCATCCCACGATGTGACGGG	6	-	739	1593
ENSDARG00000008473	ENSDART00000019008	11	5	5	GTATCCGGCATTGAGGAGCATCT	5	-	824	1593
ENSDARG00000008473	ENSDART00000019008	11	5	5	AGCTGCGCCGGACCCATGGGTGGAG	7	-	862	1593
ENSDARG00000008473	ENSDART00000019008	11	5	5	AGCATCTCCAGACAGTGTGTGTGT	6	-	807	1593
ENSDARG00000008473	ENSDART00000019008	11	6	6	ATCACCAGAGTGTCTTTGATGAC	5	-	1246	1593
ENSDARG00000008473	ENSDART00000019008	11	6	6	TGCAGCGCCGAGGGGAAGTGTGT	5	-	1093	1593
ENSDARG00000008473	ENSDART00000019008	11	6	6	TACTGCAGCGCCGAGGGGAAGTG	5	-	1096	1593
ENSDARG00000008473	ENSDART00000019008	11	6	6	AAAATCACCAGAGTGTCTTTGAT	5	-	1249	1593
ENSDARG00000008473	ENSDART00000019008	11	8	8	ACAGCCTTCAATTTGGAGCAGAA	5	-	1369	1593
ENSDARG00000008473	ENSDART00000019008	11	9	9	GTTTCAGTCTCTCCGGCAGTGGAA	6	-	1529	1593
ENSDARG00000008473	ENSDART00000019008	11	9	9	GACATCGCACATTCTCTGTGGAG	5	-	1428	1593
ENSDARG00000008542	ENSDART00000023388	11	3	2	GTATTCAGAAGCCGTTTTGGGCA	5	+	456	903
ENSDARG00000008542	ENSDART00000023388	11	3	2	GGCCACACCAATTTTGGAGAGGTG	6	+	889	903
ENSDARG00000008542	ENSDART00000023388	11	3	2	GCCGACAACTCCTGTTTGTTTAC	5	+	334	903
ENSDARG00000008542	ENSDART00000023388	11	3	2	CCCCACCGCGTATTCAGAAGCCGTT	7	+	447	903
ENSDARG00000008542	ENSDART00000023388	11	3	2	ACCCCAGTCGTCGAGCGCCGCGTAG	7	+	304	903
ENSDARG00000008727	ENSDART00000027600	11	4	3	CTCCTCTGCTGACCTCTGGGGAC	5	-	74	1533
ENSDARG00000008727	ENSDART00000027600	11	5	4	TTCGGCCTCTTTTGGCAGCAGGG	5	-	147	1533
ENSDARG00000008727	ENSDART00000027600	11	14	13	AGCAAACACTTCTGTGGCTTGTGT	6	-	984	1533
ENSDARG00000008727	ENSDART00000027600	11	15	14	TACCCAATCTGGACTGTAGAGTGC	6	-	1160	1533
ENSDARG00000008727	ENSDART00000027600	11	17	16	CTCCTCAGCGCAAGGATGCGATGAT	7	-	1364	1533
ENSDARG00000008727	ENSDART00000027600	11	17	16	CTCAGCGCAAGGATGCGATGATGCA	7	-	1361	1533
ENSDARG00000008727	ENSDART00000104409	11	3	3	CTCCTCTGCTGACCTCTGGGGAC	5	-	74	1515
ENSDARG00000008727	ENSDART00000104409	11	4	4	TTCGGCCTCTTTTGGCAGCAGGG	5	-	147	1515
ENSDARG00000008727	ENSDART00000104409	11	14	14	AGCAAACACTTCTGTGGCTTGTGT	6	-	966	1515
ENSDARG00000008727	ENSDART00000104409	11	15	15	TACCCAATCTGGACTGTAGAGTGC	6	-	1142	1515
ENSDARG00000008727	ENSDART00000104409	11	17	17	CTCAGCGCAAGGATGCGATGATGCA	7	-	1343	1515
ENSDARG00000008727	ENSDART00000104409	11	17	17	CTCCTCAGCGCAAGGATGCGATGAT	7	-	1346	1515
ENSDARG00000008727	ENSDART00000104411	11	2	2	CTCCTCTGCTGACCTCTGGGGAC	5	-	71	1569
ENSDARG00000008727	ENSDART00000104411	11	3	3	TTCGGCCTCTTTTGGCAGCAGGG	5	-	144	1569
ENSDARG00000008727	ENSDART00000104411	11	13	13	AGCAAACACTTCTGTGGCTTGTGT	6	-	993	1569
ENSDARG00000008727	ENSDART00000104411	11	14	14	TACCCAATCTGGACTGTAGAGTGC	6	-	1169	1569
ENSDARG00000008727	ENSDART00000104411	11	16	16	CTCCTCAGCGCAAGGATGCGATGAT	7	-	1373	1569
ENSDARG00000008727	ENSDART00000104411	11	16	16	CTCAGCGCAAGGATGCGATGATGCA	7	-	1370	1569
ENSDARG00000008890	ENSDART00000002459	11	1	1	ACCACCAAATGCTGTGTGTTTAC	5	-	56	1152
ENSDARG00000008890	ENSDART00000002459	11	2	2	GACGGCCACTTCTGCATCTGTAGAT	7	-	69	1152
ENSDARG00000008890	ENSDART00000002459	11	3	3	ACATACCTCATTGGGTAGTTGAA	5	-	227	1152
ENSDARG00000008890	ENSDART00000002459	11	4	4	CACTGCAAAAGATACAGATGTGTTT	7	-	261	1152
ENSDARG00000008890	ENSDART00000002459	11	4	4	CAACGCACCTTTTTATGCGAGTGT	6	-	332	1152
ENSDARG00000008890	ENSDART00000002459	11	9	9	TCCAGCAGCACATTGCCGATGCT	5	-	916	1152
ENSDARG00000008890	ENSDART00000002459	11	10	10	CGCCCAGTCCGAACTTAGTAGGG	5	-	1020	1152
ENSDARG00000009438	ENSDART00000014062	11	1	1	AACCCCAACCAGAGGCTGCCGAA	5	+	403	768
ENSDARG00000009438	ENSDART00000014062	11	1	1	ACCCCAACCAGAGGCTGCCGAAGGT	7	+	404	768
ENSDARG00000009438	ENSDART00000014062	11	1	1	CCCCAACCAGAGGCTGCCGAAGGT	6	+	405	768
ENSDARG00000009438	ENSDART00000014062	11	1	1	CGCTGCTCCACATACTGGGGTGAG	6	+	537	768
ENSDARG00000009438	ENSDART00000014062	11	1	1	TGCTCCACATACTGGGGTGAGTG	5	+	540	768
ENSDARG00000009438	ENSDART00000014062	11	1	1	TGCTCCACATACTGGGGTGAGTGC	6	+	540	768
ENSDARG00000009519	ENSDART00000040305	11	1	1	TTAACCGCAAGAAAGGATTTGGAG	6	+	68	801
ENSDARG00000009519	ENSDART00000040305	11	1	1	TTAACCGCAAGAAAGGATTTGGA	5	+	68	801
ENSDARG00000009519	ENSDART00000040305	11	2	2	GTCCAAGCACTCCTCTTCTGGTGAC	7	+	216	801
ENSDARG00000009519	ENSDART00000040305	11	2	2	GTCATCTTCCTCTGAATTTGAGGAG	7	+	243	801
ENSDARG00000009519	ENSDART00000040305	11	6	6	AACGTCACCGAGCTGCAGGGTCT	5	+	711	801
ENSDARG00000009519	ENSDART00000103298	11	3	3	GCAATCTGCATTGTGGGAGAAGAA	6	+	265	2379
ENSDARG00000009519	ENSDART00000103298	11	4	4	GGCAACAGAAGGAAGAGGGGTGGCC	7	+	324	2379
ENSDARG00000009519	ENSDART00000103298	11	4	4	CACGGCAACAGAAGGAAGAGGGG	5	+	321	2379
ENSDARG00000009519	ENSDART00000103298	11	8	8	GACTTCAGCCATCTATTAGGTGTG	6	+	847	2379
ENSDARG00000009519	ENSDART00000103298	11	8	8	CAAATCGTCCTTCATCGAAGCGGCA	7	+	784	2379
ENSDARG00000009519	ENSDART00000103298	11	8	8	AGCGGCACAGATCCTGACTTTGGC	6	+	802	2379
ENSDARG00000009519	ENSDART00000103298	11	8	8	GCAAACGTCTGGATGTGGACTTC	5	+	830	2379
ENSDARG00000009519	ENSDART00000103298	11	11	11	ACATCCTGCCTTTCGGCCTGAAAC	6	+	1244	2379
ENSDARG00000009519	ENSDART00000103298	11	11	11	TCCACCTCCTCTAGGACTGGGTG	5	+	1200	2379
ENSDARG00000009519	ENSDART00000103298	11	11	11	CTCCACCTCCTCTAGGACTGGGTG	6	+	1199	2379
ENSDARG00000009519	ENSDART00000103298	11	12	12	CGCCAAAGAGGATCGTTATGAGAA	6	+	1362	2379
ENSDARG00000009519	ENSDART00000103298	11	15	15	AGCATCTGCCTGAACAGGAGCAGCT	7	+	1637	2379
ENSDARG00000009519	ENSDART00000103298	11	15	15	AGAACCAGAGCAGTTTGGAGTCGTG	7	+	1704	2379
ENSDARG00000009519	ENSDART00000103298	11	16	16	GCAGCCTGCGATGAGGTGAGGAA	5	+	1834	2379
ENSDARG00000009519	ENSDART00000103298	11	17	17	AAATTCCCAGAAGTGCTGAAGTT	5	+	2038	2379
ENSDARG00000009519	ENSDART00000103298	11	18	18	AGAAACACCTGCTGCAGTTGGAGAA	7	+	2138	2379
ENSDARG00000009519	ENSDART00000103298	11	19	19	TACCTCAACATGCTGGAGTATTT	5	+	2293	2379
ENSDARG00000009519	ENSDART00000103298	11	19	19	GACCCCAAAAAGACTTCTGTGGAG	6	+	2323	2379
ENSDARG00000009519	ENSDART00000103298	11	19	19	CCCCAAAAAGACTTCTGTGGAGGAA	7	+	2325	2379
ENSDARG00000009519	ENSDART00000103298	11	19	19	CCCCAAAAAGACTTCTGTGGAGGA	6	+	2325	2379
ENSDARG00000009519	ENSDART00000103298	11	19	19	ACCCCAAAAAGACTTCTGTGGAGGA	7	+	2324	2379
ENSDARG00000009519	ENSDART00000103298	11	19	19	ACCCCAAAAAGACTTCTGTGGAG	5	+	2324	2379
ENSDARG00000009612	ENSDART00000018409	11	4	3	AGCTCATTCCTTTGGTTGATGAT	5	-	187	1416
ENSDARG00000009612	ENSDART00000018409	11	6	5	CACAGCAGAGTGAATCTTTGTTTGT	7	-	464	1416
ENSDARG00000009612	ENSDART00000018409	11	7	6	TCCATCATCAATAGTGCCTTTGCC	6	-	571	1416
ENSDARG00000009612	ENSDART00000018409	11	8	7	TCCCTCATCCTTTGAGCCTTGGTA	6	-	697	1416
ENSDARG00000009612	ENSDART00000018409	11	8	7	CCCTCATCCTTTGAGCCTTGGTA	5	-	697	1416
ENSDARG00000009612	ENSDART00000018409	11	9	8	TGCTGCAAAGCCCATTCTGAGTTT	6	-	787	1416
ENSDARG00000009612	ENSDART00000018409	11	9	8	GAATCCAGCCTCGCGAGTGTAGGTT	7	-	885	1416
ENSDARG00000009612	ENSDART00000018409	11	9	8	CTCCAACGCTGGTATCTGAAGAT	5	-	834	1416
ENSDARG00000009612	ENSDART00000018409	11	9	8	AGCTCCAACGCTGGTATCTGAAGAT	7	-	834	1416
ENSDARG00000009612	ENSDART00000018409	11	10	9	AACCCACTCGCTGTTCTTTGTGGCA	7	-	984	1416
ENSDARG00000009612	ENSDART00000018409	11	12	11	GCCAAACACAGCACTTGCAGCTGTC	7	-	1393	1416
ENSDARG00000009612	ENSDART00000067816	11	2	2	AGCTCATTCCTTTGGTTGATGAT	5	-	190	1413
ENSDARG00000009612	ENSDART00000067816	11	4	4	CACAGCAGAGTGAATCTTTGTTTGT	7	-	467	1413
ENSDARG00000009612	ENSDART00000067816	11	5	5	TCCATCATCAATAGTGCCTTTGCC	6	-	574	1413
ENSDARG00000009612	ENSDART00000067816	11	6	6	TCCCTCATCCTTTGAGCCTTGGTA	6	-	700	1413
ENSDARG00000009612	ENSDART00000067816	11	6	6	CCCTCATCCTTTGAGCCTTGGTA	5	-	700	1413
ENSDARG00000009612	ENSDART00000067816	11	7	7	TGCTGCAAAGCCCATTCTGAGTTT	6	-	790	1413
ENSDARG00000009612	ENSDART00000067816	11	7	7	GAATCCAGCCTCGCGAGTGTAGGTT	7	-	888	1413
ENSDARG00000009612	ENSDART00000067816	11	7	7	CTCCAACGCTGGTATCTGAAGAT	5	-	837	1413
ENSDARG00000009612	ENSDART00000067816	11	7	7	AGCTCCAACGCTGGTATCTGAAGAT	7	-	837	1413
ENSDARG00000009612	ENSDART00000067816	11	8	8	AACCCACTCGCTGTTCTTTGTGGCA	7	-	987	1413
ENSDARG00000009612	ENSDART00000067816	11	10	10	GCCAAACACAGCACTTGCAGCTGTC	7	-	1396	1413
ENSDARG00000009612	ENSDART00000103770	11	3	3	AGCTCATTCCTTTGGTTGATGAT	5	-	190	1371
ENSDARG00000009612	ENSDART00000103770	11	5	5	CACAGCAGAGTGAATCTTTGTTTGT	7	-	467	1371
ENSDARG00000009612	ENSDART00000103770	11	6	6	TCCATCATCAATAGTGCCTTTGCC	6	-	574	1371
ENSDARG00000009612	ENSDART00000103770	11	7	7	TCCCTCATCCTTTGAGCCTTGGTA	6	-	700	1371
ENSDARG00000009612	ENSDART00000103770	11	7	7	CCCTCATCCTTTGAGCCTTGGTA	5	-	700	1371
ENSDARG00000009612	ENSDART00000103770	11	8	8	TGCTGCAAAGCCCATTCTGAGTTT	6	-	790	1371
ENSDARG00000009612	ENSDART00000103770	11	8	8	GAATCCAGCCTCGCGAGTGTAGGTT	7	-	888	1371
ENSDARG00000009612	ENSDART00000103770	11	8	8	CTCCAACGCTGGTATCTGAAGAT	5	-	837	1371
ENSDARG00000009612	ENSDART00000103770	11	8	8	AGCTCCAACGCTGGTATCTGAAGAT	7	-	837	1371
ENSDARG00000009612	ENSDART00000103770	11	9	9	AACCCACTCGCTGTTCTTTGTGGCA	7	-	987	1371
ENSDARG00000009612	ENSDART00000103770	11	12	12	GCCAAACACAGCACTTGCAGCTGTC	7	-	1354	1371
ENSDARG00000009612	ENSDART00000103771	11	4	4	AGCTCATTCCTTTGGTTGATGAT	5	-	244	1479
ENSDARG00000009612	ENSDART00000103771	11	6	6	CACAGCAGAGTGAATCTTTGTTTGT	7	-	521	1479
ENSDARG00000009612	ENSDART00000103771	11	7	7	TCCATCATCAATAGTGCCTTTGCC	6	-	628	1479
ENSDARG00000009612	ENSDART00000103771	11	8	8	TCCCTCATCCTTTGAGCCTTGGTA	6	-	754	1479
ENSDARG00000009612	ENSDART00000103771	11	8	8	CCCTCATCCTTTGAGCCTTGGTA	5	-	754	1479
ENSDARG00000009612	ENSDART00000103771	11	9	9	GAATCCAGCCTCGCGAGTGTAGGTT	7	-	942	1479
ENSDARG00000009612	ENSDART00000103771	11	9	9	CTCCAACGCTGGTATCTGAAGAT	5	-	891	1479
ENSDARG00000009612	ENSDART00000103771	11	9	9	AGCTCCAACGCTGGTATCTGAAGAT	7	-	891	1479
ENSDARG00000009612	ENSDART00000103771	11	9	9	TGCTGCAAAGCCCATTCTGAGTTT	6	-	844	1479
ENSDARG00000009612	ENSDART00000103771	11	10	10	AACCCACTCGCTGTTCTTTGTGGCA	7	-	1041	1479
ENSDARG00000009612	ENSDART00000103771	11	12	12	GCCAAACACAGCACTTGCAGCTGTC	7	-	1459	1479
ENSDARG00000009727	ENSDART00000005999	11	2	2	CTCCTCTTCTGGCCTTTATGAGGA	6	-	56	1092
ENSDARG00000009727	ENSDART00000005999	11	4	4	CACTTCATCATTTATGTGGCTTC	5	-	350	1092
ENSDARG00000009727	ENSDART00000005999	11	7	7	AGCCTCCTCCTGCAATGGGAATGC	6	-	589	1092
ENSDARG00000009727	ENSDART00000005999	11	7	7	GCCTCCTCCTGCAATGGGAATGC	5	-	589	1092
ENSDARG00000009727	ENSDART00000005999	11	7	7	AAACCCTGCAAAGTCGGGTTTTTAC	7	-	563	1092
ENSDARG00000009727	ENSDART00000005999	11	8	8	ACCTACAGCTTCCAGAGGCTGTC	5	-	794	1092
ENSDARG00000009727	ENSDART00000005999	11	9	9	TTCGACCTCATCCAGCAGTCGAT	5	-	884	1092
ENSDARG00000009727	ENSDART00000005999	11	9	9	GACCTCATCCAGCAGTCGATTCT	5	-	881	1092
ENSDARG00000009727	ENSDART00000104046	11	1	1	CTCCTCTTCTGGCCTTTATGAGGA	6	-	50	1041
ENSDARG00000009727	ENSDART00000104046	11	3	3	CACTTCATCATTTATGTGGCTTC	5	-	344	1041
ENSDARG00000009727	ENSDART00000104046	11	5	5	AAACCCTGCAAAGTCGGGTTTTTAC	7	-	512	1041
ENSDARG00000009727	ENSDART00000104046	11	5	5	GCCTCCTCCTGCAATGGGAATGC	5	-	538	1041
ENSDARG00000009727	ENSDART00000104046	11	5	5	AGCCTCCTCCTGCAATGGGAATGC	6	-	538	1041
ENSDARG00000009727	ENSDART00000104046	11	6	6	ACCTACAGCTTCCAGAGGCTGTC	5	-	743	1041
ENSDARG00000009727	ENSDART00000104046	11	7	7	TTCGACCTCATCCAGCAGTCGAT	5	-	833	1041
ENSDARG00000009727	ENSDART00000104046	11	7	7	GACCTCATCCAGCAGTCGATTCT	5	-	830	1041
ENSDARG00000009754	ENSDART00000034027	11	4	4	AGAGGCCCCGCTTGAGGAGAAGGT	6	+	333	1074
ENSDARG00000009754	ENSDART00000034027	11	5	5	GTTTTCAGAGGAAGGAGACGAATCT	7	+	501	1074
ENSDARG00000009754	ENSDART00000034027	11	8	8	AGATTCATCTGGTAAAGAAGTTGGA	7	+	744	1074
ENSDARG00000009754	ENSDART00000103766	11	6	4	AGAGGCCCCGCTTGAGGAGAAGGT	6	+	333	1074
ENSDARG00000009754	ENSDART00000103766	11	7	5	GTTTTCAGAGGAAGGAGACGAATCT	7	+	501	1074
ENSDARG00000009754	ENSDART00000103766	11	10	8	AGATTCATCTGGTAAAGAAGTTGGA	7	+	744	1074
ENSDARG00000009942	ENSDART00000011657	11	4	4	TTCTGCCACTACGTGATTTTGCA	5	-	695	1764
ENSDARG00000009942	ENSDART00000011657	11	4	4	TGCCACTACGTGATTTTGCAGGA	5	-	692	1764
ENSDARG00000009942	ENSDART00000011657	11	4	4	AGAGCCTGCTTTACACTCTGAAAAC	7	-	605	1764
ENSDARG00000009942	ENSDART00000011657	11	5	5	CGCAAATTCATACAGTTGATGAC	5	-	826	1764
ENSDARG00000009942	ENSDART00000011657	11	6	6	CACTCAAAAATGGTGTAGAGAAC	5	-	1003	1764
ENSDARG00000009942	ENSDART00000011657	11	7	7	TTCGCCTGCAGTCTTGGCAGGATAC	7	-	1091	1764
ENSDARG00000009942	ENSDART00000011657	11	8	8	ACCTGCAGATGTCCAGTGCTTTGCG	7	-	1279	1764
ENSDARG00000009942	ENSDART00000011657	11	8	8	GCACAAAACTGAACTGCCGCTGCA	6	-	1224	1764
ENSDARG00000009942	ENSDART00000011657	11	10	10	GCAGGCAGCAGACCAGAAGTTTCT	6	-	1475	1764
ENSDARG00000009942	ENSDART00000011657	11	11	11	TCCACCAACCTGCCTCTGCTTAC	5	-	1571	1764
ENSDARG00000009942	ENSDART00000011657	11	11	11	GTACACTTCACACAGCTGGAGGA	5	-	1538	1764
ENSDARG00000010096	ENSDART00000012789	11	1	1	GCCTTCGTCAGCGCGCTGCGGCTTC	7	-	54	1671
ENSDARG00000010096	ENSDART00000012789	11	1	1	CTCGGCACAGGCGGTGGAGGCCTTC	7	-	73	1671
ENSDARG00000010096	ENSDART00000012789	11	1	1	TCCTGCTTCCAGACATCTGTTTCT	6	-	104	1671
ENSDARG00000010096	ENSDART00000012789	11	1	1	TTCGTCAGCGCGCTGCGGCTTCT	5	-	53	1671
ENSDARG00000010096	ENSDART00000012789	11	1	1	AGAAACAGACTAGTGCTGTTTGGAG	7	-	14	1671
ENSDARG00000010096	ENSDART00000012789	11	1	1	ACACTCGGCACAGGCGGTGGAGGCC	7	-	76	1671
ENSDARG00000010096	ENSDART00000012789	11	1	1	ACACTCGGCACAGGCGGTGGAGGC	6	-	77	1671
ENSDARG00000010096	ENSDART00000012789	11	1	1	GCCTTCGTCAGCGCGCTGCGGCT	5	-	56	1671
ENSDARG00000010096	ENSDART00000012789	11	3	3	ACCATCACAATGCCGATGAAAAC	5	-	439	1671
ENSDARG00000010096	ENSDART00000012789	11	4	4	GGCTTCAACTAAATTTGGTGGAAAC	7	-	570	1671
ENSDARG00000010096	ENSDART00000012789	11	4	4	GCAGGCTTCAACTAAATTTGGTGGA	7	-	573	1671
ENSDARG00000010096	ENSDART00000012789	11	5	5	TCCTCCACCGTCTCCTGGATGGTCT	7	-	725	1671
ENSDARG00000010096	ENSDART00000012789	11	6	6	AGAACCAACAGGCCGTGGATGAGCA	7	-	1034	1671
ENSDARG00000010096	ENSDART00000012789	11	6	6	AGAACCAACAGGCCGTGGATGAG	5	-	1036	1671
ENSDARG00000010096	ENSDART00000012789	11	7	7	GCACAAAACGTGTCACTCTTTTGTC	7	-	1207	1671
ENSDARG00000010096	ENSDART00000012789	11	8	8	GTAACCAGCCCAGCCTGAGGGATGC	7	-	1385	1671
ENSDARG00000010096	ENSDART00000012789	11	8	8	AGCCCAGCCTGAGGGATGCCTGC	5	-	1381	1671
ENSDARG00000010096	ENSDART00000012789	11	8	8	TGCTGCTCCGATGCTAGCGGCGGTT	7	-	1359	1671
ENSDARG00000010096	ENSDART00000012789	11	9	9	TTCTACGTCTTGGTTCTGAAGTT	5	-	1562	1671
ENSDARG00000010096	ENSDART00000012789	11	9	9	CTCCCAGCACGTTGGTGGTGGTC	5	-	1497	1671
ENSDARG00000010096	ENSDART00000017743	11	3	3	ACCATCACAATGCCGATGAAAAC	5	-	304	1446
ENSDARG00000010096	ENSDART00000017743	11	4	4	GGCTTCAACTAAATTTGGTGGAAAC	7	-	435	1446
ENSDARG00000010096	ENSDART00000017743	11	4	4	GCAGGCTTCAACTAAATTTGGTGGA	7	-	438	1446
ENSDARG00000010096	ENSDART00000017743	11	6	6	TCCTCCACCGTCTCCTGGATGGTCT	7	-	521	1446
ENSDARG00000010096	ENSDART00000017743	11	7	7	AGAACCAACAGGCCGTGGATGAG	5	-	832	1446
ENSDARG00000010096	ENSDART00000017743	11	7	7	AGAACCAACAGGCCGTGGATGAGCA	7	-	830	1446
ENSDARG00000010096	ENSDART00000017743	11	8	8	GCACAAAACGTGTCACTCTTTTGTC	7	-	1003	1446
ENSDARG00000010096	ENSDART00000017743	11	9	9	GTAACCAGCCCAGCCTGAGGGATGC	7	-	1181	1446
ENSDARG00000010096	ENSDART00000017743	11	9	9	AGCCCAGCCTGAGGGATGCCTGC	5	-	1177	1446
ENSDARG00000010096	ENSDART00000017743	11	9	9	TGCTGCTCCGATGCTAGCGGCGGTT	7	-	1155	1446
ENSDARG00000010096	ENSDART00000017743	11	10	10	TTCTACGTCTTGGTTCTGAAGTT	5	-	1358	1446
ENSDARG00000010096	ENSDART00000017743	11	10	10	CTCCCAGCACGTTGGTGGTGGTC	5	-	1293	1446
ENSDARG00000010096	ENSDART00000082246	11	3	3	ACCATCACAATGCCGATGAAAAC	5	-	310	1539
ENSDARG00000010096	ENSDART00000082246	11	4	4	GGCTTCAACTAAATTTGGTGGAAAC	7	-	441	1539
ENSDARG00000010096	ENSDART00000082246	11	4	4	GCAGGCTTCAACTAAATTTGGTGGA	7	-	444	1539
ENSDARG00000010096	ENSDART00000082246	11	6	6	TCCTCCACCGTCTCCTGGATGGTCT	7	-	605	1539
ENSDARG00000010096	ENSDART00000082246	11	7	7	AGAACCAACAGGCCGTGGATGAGCA	7	-	914	1539
ENSDARG00000010096	ENSDART00000082246	11	7	7	AGAACCAACAGGCCGTGGATGAG	5	-	916	1539
ENSDARG00000010096	ENSDART00000082246	11	8	8	GCACAAAACGTGTCACTCTTTTGTC	7	-	1087	1539
ENSDARG00000010096	ENSDART00000082246	11	9	9	AGCCCAGCCTGAGGGATGCCTGC	5	-	1261	1539
ENSDARG00000010096	ENSDART00000082246	11	9	9	GTAACCAGCCCAGCCTGAGGGATGC	7	-	1265	1539
ENSDARG00000010096	ENSDART00000082246	11	9	9	TGCTGCTCCGATGCTAGCGGCGGTT	7	-	1239	1539
ENSDARG00000010096	ENSDART00000082246	11	10	10	TTCTACGTCTTGGTTCTGAAGTT	5	-	1442	1539
ENSDARG00000010096	ENSDART00000082246	11	10	10	CTCCCAGCACGTTGGTGGTGGTC	5	-	1377	1539
ENSDARG00000010378	ENSDART00000006922	11	1	1	TTCTGCCCCATCCAGTGGTGAAGCA	7	-	157	480
ENSDARG00000010378	ENSDART00000006922	11	1	1	TGCCCCATCCAGTGGTGAAGCAGCG	7	-	154	480
ENSDARG00000010378	ENSDART00000006922	11	1	1	GTTCCAGACTGGATGTTGATGGC	5	-	130	480
ENSDARG00000010378	ENSDART00000006922	11	1	1	GCCCCATCCAGTGGTGAAGCAGCG	6	-	154	480
ENSDARG00000010378	ENSDART00000006922	11	3	3	TCCTGCACAGATCATGGCGTCTGT	6	-	283	480
ENSDARG00000010378	ENSDART00000006922	11	3	3	TTCGACCCCAGATCTGTCTGCAGTC	7	-	250	480
ENSDARG00000010519	ENSDART00000024304	11	2	1	CACCCACACCTCCAGCAGTGGAA	5	+	240	3843
ENSDARG00000010519	ENSDART00000024304	11	2	1	GCACCCACACCTCCAGCAGTGGAA	6	+	239	3843
ENSDARG00000010519	ENSDART00000024304	11	2	1	TTCCGCATCTGGAGAGGAGGAAGAG	7	+	132	3843
ENSDARG00000010519	ENSDART00000024304	11	2	1	AGCACCCACACCTCCAGCAGTGGAA	7	+	238	3843
ENSDARG00000010519	ENSDART00000024304	11	3	2	CTCATCACACTGAATGCGGGTAA	5	+	422	3843
ENSDARG00000010519	ENSDART00000024304	11	4	3	ACACACAGAGAGATGATGCATAC	5	+	469	3843
ENSDARG00000010519	ENSDART00000024304	11	4	3	AGCGTCTGCCGTCTGAGAAGAGGAG	7	+	509	3843
ENSDARG00000010519	ENSDART00000024304	11	4	3	ACACACACAGAGAGATGATGCATAC	7	+	467	3843
ENSDARG00000010519	ENSDART00000024304	11	4	3	AAAGCCAGCACTGTGGAGGCTCT	5	+	541	3843
ENSDARG00000010519	ENSDART00000024304	11	4	3	GCACACACACAGAGAGATGATGCA	6	+	465	3843
ENSDARG00000010519	ENSDART00000024304	11	9	8	GACTCATTCACCAGGATGTGTCT	5	+	1149	3843
ENSDARG00000010519	ENSDART00000024304	11	9	8	GACTCATTCACCAGGATGTGTCTTT	7	+	1149	3843
ENSDARG00000010519	ENSDART00000024304	11	11	10	AGCTTCATCAACCCATGGAGCCGAA	7	+	1393	3843
ENSDARG00000010519	ENSDART00000024304	11	12	11	GCCCTCTAAATGAGGATGTTTTC	5	+	1457	3843
ENSDARG00000010519	ENSDART00000024304	11	14	13	CTCTGCAGCAGTTTTGTGCTGAT	5	+	1697	3843
ENSDARG00000010519	ENSDART00000024304	11	16	15	GAAGACAAACCTACAGCGGCTGCA	6	+	2029	3843
ENSDARG00000010519	ENSDART00000024304	11	16	15	CTCGTCCTCCACCTCAGAAGAAGAC	7	+	2010	3843
ENSDARG00000010519	ENSDART00000024304	11	17	16	GTCCACGTCCCACAGCCTGAGTC	5	+	2230	3843
ENSDARG00000010519	ENSDART00000024304	11	17	16	TTCAGCCACGACAGCAGCGGTGGTC	7	+	2118	3843
ENSDARG00000010519	ENSDART00000024304	11	17	16	CACGACAGCAGCGGTGGTCGGAGCT	7	+	2124	3843
ENSDARG00000010519	ENSDART00000024304	11	17	16	AGCCACGACAGCAGCGGTGGTCGGA	7	+	2121	3843
ENSDARG00000010519	ENSDART00000024304	11	18	17	CTCCACGTCTCAAGAGGAGCTGCT	6	+	2346	3843
ENSDARG00000010519	ENSDART00000024304	11	18	17	ACACACAGAAGGAGGAGCAGCAGTT	7	+	2405	3843
ENSDARG00000010519	ENSDART00000024304	11	18	17	ACATTCACATCACAGAGGTGTGT	5	+	2505	3843
ENSDARG00000010519	ENSDART00000024304	11	18	17	GTCTCAAGAGGAGCTGCTGGTGCT	6	+	2352	3843
ENSDARG00000010519	ENSDART00000024304	11	18	17	ACATTCACATCACAGAGGTGTGTTT	7	+	2505	3843
ENSDARG00000010519	ENSDART00000024304	11	18	17	GGCTCACACACAGAAGGAGGAGCA	6	+	2400	3843
ENSDARG00000010519	ENSDART00000024304	11	19	18	AGCTCAATCTGCTGCAGGAGGAGCT	7	+	3101	3843
ENSDARG00000010519	ENSDART00000024304	11	19	18	CCCCCATCCAGCTCAATCTGCTGCA	7	+	3092	3843
ENSDARG00000010519	ENSDART00000024304	11	19	18	TCCGCCATCCAACATCGGCTTTGTG	7	+	2676	3843
ENSDARG00000010519	ENSDART00000024304	11	20	19	CTACCAGCCACACTGGTGCGGTT	5	+	3371	3843
ENSDARG00000010519	ENSDART00000024304	11	20	19	CTCCAATGCCTCAGGAAGTGGCT	5	+	3291	3843
ENSDARG00000010519	ENSDART00000024304	11	22	21	GTTCACTTCGGACCAGAAGAAGGA	6	+	3639	3843
ENSDARG00000010519	ENSDART00000102716	11	1	1	AGCGTCTGCCGTCTGAGAAGAGGAG	7	+	50	3366
ENSDARG00000010519	ENSDART00000102716	11	1	1	GCACACACACAGAGAGATGATGCA	6	+	6	3366
ENSDARG00000010519	ENSDART00000102716	11	1	1	ACACACAGAGAGATGATGCATAC	5	+	10	3366
ENSDARG00000010519	ENSDART00000102716	11	1	1	ACACACACAGAGAGATGATGCATAC	7	+	8	3366
ENSDARG00000010519	ENSDART00000102716	11	1	1	AAAGCCAGCACTGTGGAGGCTCT	5	+	82	3366
ENSDARG00000010519	ENSDART00000102716	11	6	6	GACTCATTCACCAGGATGTGTCTTT	7	+	690	3366
ENSDARG00000010519	ENSDART00000102716	11	6	6	GACTCATTCACCAGGATGTGTCT	5	+	690	3366
ENSDARG00000010519	ENSDART00000102716	11	8	8	AGCTTCATCAACCCATGGAGCCGAA	7	+	934	3366
ENSDARG00000010519	ENSDART00000102716	11	9	9	GCCCTCTAAATGAGGATGTTTTC	5	+	998	3366
ENSDARG00000010519	ENSDART00000102716	11	11	11	CTCTGCAGCAGTTTTGTGCTGAT	5	+	1226	3366
ENSDARG00000010519	ENSDART00000102716	11	12	12	CCCGTCTAAAACTCCGTCGGGTCT	6	+	1335	3366
ENSDARG00000010519	ENSDART00000102716	11	14	14	GAAGACAAACCTACAGCGGCTGCA	6	+	1582	3366
ENSDARG00000010519	ENSDART00000102716	11	14	14	CTCGTCCTCCACCTCAGAAGAAGAC	7	+	1563	3366
ENSDARG00000010519	ENSDART00000102716	11	15	15	GTCCACGTCCCACAGCCTGAGTC	5	+	1783	3366
ENSDARG00000010519	ENSDART00000102716	11	15	15	TTCAGCCACGACAGCAGCGGTGGTC	7	+	1671	3366
ENSDARG00000010519	ENSDART00000102716	11	15	15	CACGACAGCAGCGGTGGTCGGAGCT	7	+	1677	3366
ENSDARG00000010519	ENSDART00000102716	11	15	15	AGCCACGACAGCAGCGGTGGTCGGA	7	+	1674	3366
ENSDARG00000010519	ENSDART00000102716	11	16	16	CTCCACGTCTCAAGAGGAGCTGCT	6	+	1899	3366
ENSDARG00000010519	ENSDART00000102716	11	16	16	ACACACAGAAGGAGGAGCAGCAGTT	7	+	1958	3366
ENSDARG00000010519	ENSDART00000102716	11	16	16	GTCTCAAGAGGAGCTGCTGGTGCT	6	+	1905	3366
ENSDARG00000010519	ENSDART00000102716	11	16	16	ACATTCACATCACAGAGGTGTGT	5	+	2058	3366
ENSDARG00000010519	ENSDART00000102716	11	16	16	GGCTCACACACAGAAGGAGGAGCA	6	+	1953	3366
ENSDARG00000010519	ENSDART00000102716	11	16	16	ACATTCACATCACAGAGGTGTGTTT	7	+	2058	3366
ENSDARG00000010519	ENSDART00000102716	11	20	20	AGCTCAATCTGCTGCAGGAGGAGCT	7	+	2699	3366
ENSDARG00000010519	ENSDART00000102716	11	20	20	CCCCCATCCAGCTCAATCTGCTGCA	7	+	2690	3366
ENSDARG00000010519	ENSDART00000102716	11	20	20	TCCGCCATCCAACATCGGCTTTGTG	7	+	2274	3366
ENSDARG00000010519	ENSDART00000102716	11	23	23	CTACCAGCCACACTGGTGCGGTT	5	+	3029	3366
ENSDARG00000010519	ENSDART00000102716	11	23	23	CTCCAATGCCTCAGGAAGTGGCT	5	+	2949	3366
ENSDARG00000010519	ENSDART00000102716	11	25	25	GTTCACTTCGGACCAGAAGAAGGA	6	+	3297	3366
ENSDARG00000010519	ENSDART00000102722	11	1	1	GCACCCACACCTCCAGCAGTGGAA	6	+	239	3792
ENSDARG00000010519	ENSDART00000102722	11	1	1	CACCCACACCTCCAGCAGTGGAA	5	+	240	3792
ENSDARG00000010519	ENSDART00000102722	11	1	1	AGCACCCACACCTCCAGCAGTGGAA	7	+	238	3792
ENSDARG00000010519	ENSDART00000102722	11	1	1	TTCCGCATCTGGAGAGGAGGAAGAG	7	+	132	3792
ENSDARG00000010519	ENSDART00000102722	11	3	3	CTCATCACACTGAATGCGGGTAA	5	+	371	3792
ENSDARG00000010519	ENSDART00000102722	11	5	5	ACACACAGAGAGATGATGCATAC	5	+	418	3792
ENSDARG00000010519	ENSDART00000102722	11	5	5	GCACACACACAGAGAGATGATGCA	6	+	414	3792
ENSDARG00000010519	ENSDART00000102722	11	5	5	AAAGCCAGCACTGTGGAGGCTCT	5	+	490	3792
ENSDARG00000010519	ENSDART00000102722	11	5	5	ACACACACAGAGAGATGATGCATAC	7	+	416	3792
ENSDARG00000010519	ENSDART00000102722	11	5	5	AGCGTCTGCCGTCTGAGAAGAGGAG	7	+	458	3792
ENSDARG00000010519	ENSDART00000102722	11	10	10	GACTCATTCACCAGGATGTGTCTTT	7	+	1098	3792
ENSDARG00000010519	ENSDART00000102722	11	10	10	GACTCATTCACCAGGATGTGTCT	5	+	1098	3792
ENSDARG00000010519	ENSDART00000102722	11	12	12	AGCTTCATCAACCCATGGAGCCGAA	7	+	1342	3792
ENSDARG00000010519	ENSDART00000102722	11	13	13	GCCCTCTAAATGAGGATGTTTTC	5	+	1406	3792
ENSDARG00000010519	ENSDART00000102722	11	15	15	CTCTGCAGCAGTTTTGTGCTGAT	5	+	1646	3792
ENSDARG00000010519	ENSDART00000102722	11	17	17	GAAGACAAACCTACAGCGGCTGCA	6	+	1978	3792
ENSDARG00000010519	ENSDART00000102722	11	17	17	CTCGTCCTCCACCTCAGAAGAAGAC	7	+	1959	3792
ENSDARG00000010519	ENSDART00000102722	11	18	18	GTCCACGTCCCACAGCCTGAGTC	5	+	2179	3792
ENSDARG00000010519	ENSDART00000102722	11	18	18	TTCAGCCACGACAGCAGCGGTGGTC	7	+	2067	3792
ENSDARG00000010519	ENSDART00000102722	11	18	18	AGCCACGACAGCAGCGGTGGTCGGA	7	+	2070	3792
ENSDARG00000010519	ENSDART00000102722	11	18	18	CACGACAGCAGCGGTGGTCGGAGCT	7	+	2073	3792
ENSDARG00000010519	ENSDART00000102722	11	19	19	CTCCACGTCTCAAGAGGAGCTGCT	6	+	2295	3792
ENSDARG00000010519	ENSDART00000102722	11	19	19	ACACACAGAAGGAGGAGCAGCAGTT	7	+	2354	3792
ENSDARG00000010519	ENSDART00000102722	11	19	19	ACATTCACATCACAGAGGTGTGT	5	+	2454	3792
ENSDARG00000010519	ENSDART00000102722	11	19	19	GTCTCAAGAGGAGCTGCTGGTGCT	6	+	2301	3792
ENSDARG00000010519	ENSDART00000102722	11	19	19	GGCTCACACACAGAAGGAGGAGCA	6	+	2349	3792
ENSDARG00000010519	ENSDART00000102722	11	19	19	ACATTCACATCACAGAGGTGTGTTT	7	+	2454	3792
ENSDARG00000010519	ENSDART00000102722	11	20	20	TCCGCCATCCAACATCGGCTTTGTG	7	+	2625	3792
ENSDARG00000010519	ENSDART00000102722	11	20	20	AGCTCAATCTGCTGCAGGAGGAGCT	7	+	3050	3792
ENSDARG00000010519	ENSDART00000102722	11	20	20	CCCCCATCCAGCTCAATCTGCTGCA	7	+	3041	3792
ENSDARG00000010519	ENSDART00000102722	11	21	21	CTACCAGCCACACTGGTGCGGTT	5	+	3320	3792
ENSDARG00000010519	ENSDART00000102722	11	21	21	CTCCAATGCCTCAGGAAGTGGCT	5	+	3240	3792
ENSDARG00000010519	ENSDART00000102722	11	23	23	GTTCACTTCGGACCAGAAGAAGGA	6	+	3588	3792
ENSDARG00000010789	ENSDART00000009160	11	1	1	GTCTCCTTCTTCTTTGATGCCGGC	6	+	103	1074
ENSDARG00000010789	ENSDART00000009160	11	1	1	ACCGTCTCCTTCTTCTTTGATGCC	6	+	100	1074
ENSDARG00000010789	ENSDART00000009160	11	3	3	CAAATCACAGGAGAAGTTTGAGCT	6	+	348	1074
ENSDARG00000010789	ENSDART00000009160	11	6	6	AAACTCAGAGGCCGAGCTGTTTTC	6	+	567	1074
ENSDARG00000010789	ENSDART00000009160	11	8	8	AACAACAAACCAGACTTTAGTGAAC	7	+	838	1074
ENSDARG00000010789	ENSDART00000009160	11	8	8	CAACAAACCAGACTTTAGTGAAC	5	+	840	1074
ENSDARG00000010789	ENSDART00000102553	11	2	2	GTCTCCTTCTTCTTTGATGCCGGC	6	+	109	1083
ENSDARG00000010789	ENSDART00000102553	11	2	2	ACCGTCTCCTTCTTCTTTGATGCC	6	+	106	1083
ENSDARG00000010789	ENSDART00000102553	11	4	4	CAAATCACAGGAGAAGTTTGAGCT	6	+	354	1083
ENSDARG00000010789	ENSDART00000102553	11	7	7	AAACTCAGAGGCCGAGCTGTTTTC	6	+	576	1083
ENSDARG00000010789	ENSDART00000102553	11	9	9	AACAACAAACCAGACTTTAGTGAAC	7	+	847	1083
ENSDARG00000010789	ENSDART00000102553	11	9	9	CAACAAACCAGACTTTAGTGAAC	5	+	849	1083
ENSDARG00000010794	ENSDART00000006580	11	1	1	AAATGCAGCAGGAGGAGCAGCGGGA	7	+	65	1083
ENSDARG00000010794	ENSDART00000006580	11	1	1	ACCAAATGCAGCAGGAGGAGCAGCG	7	+	62	1083
ENSDARG00000010794	ENSDART00000006580	11	2	2	ACATCCGACAGTCCCAGCGGCAGCA	7	+	257	1083
ENSDARG00000010794	ENSDART00000006580	11	5	5	AGCAACTCCTGCCCTGCGAATCT	5	+	634	1083
ENSDARG00000010794	ENSDART00000006580	11	6	6	AACAAATAAGAAACATTGTTTTGTT	7	+	717	1083
ENSDARG00000010794	ENSDART00000006580	11	8	8	GACAACCACAACCTGAGTGAGTA	5	+	820	1083
ENSDARG00000010794	ENSDART00000006580	11	10	10	AACAACTTCAGGAGGATGGAGAT	5	+	1006	1083
ENSDARG00000010978	ENSDART00000011171	11	1	1	GTAAAAAACCTCATTAGCATTTGGG	7	-	48	1719
ENSDARG00000010978	ENSDART00000011171	11	1	1	ACCTCATTAGCATTTGGGAATAA	5	-	43	1719
ENSDARG00000010978	ENSDART00000011171	11	3	3	AGCAGCTTCTTCTTCCTTTGGATGC	7	-	228	1719
ENSDARG00000010978	ENSDART00000011171	11	4	4	GCACACGCAGACCTTGCTGAAGAC	6	-	287	1719
ENSDARG00000010978	ENSDART00000011171	11	7	7	GACGACAACCTGGCCTGTTTTGAC	6	-	823	1719
ENSDARG00000010978	ENSDART00000011171	11	8	8	CTCTTCCCCATCCTCTGCAGATGAA	7	-	902	1719
ENSDARG00000010978	ENSDART00000011171	11	8	8	ATCCTCTTCCCCATCCTCTGCAGAT	7	-	905	1719
ENSDARG00000010978	ENSDART00000011171	11	12	12	ATCCCATAACACCCCCGCGGGAGCG	7	-	1305	1719
ENSDARG00000011020	ENSDART00000018131	11	2	2	GACGACAGATGAGAGTCTGAGGG	5	+	84	669
ENSDARG00000011020	ENSDART00000018131	11	2	2	GACGACAGATGAGAGTCTGAGGGC	6	+	84	669
ENSDARG00000011020	ENSDART00000018131	11	2	2	ACCCTCACAGACTGTGTGGTGAGTC	7	+	127	669
ENSDARG00000011020	ENSDART00000018131	11	2	2	ACCCTCACAGACTGTGTGGTGAG	5	+	127	669
ENSDARG00000011020	ENSDART00000018131	11	3	3	GTCACCTACAGTTCAGTGGGTGAA	6	+	190	669
ENSDARG00000011020	ENSDART00000018131	11	3	3	CACGTCCCCACAAAGTCGACGGA	5	+	233	669
ENSDARG00000011020	ENSDART00000018131	11	3	3	AAAGTCGACGGACGGGCTGTTGAA	6	+	244	669
ENSDARG00000011020	ENSDART00000018131	11	3	3	GACCCCAACACAAAGAGGTCGAG	5	+	154	669
ENSDARG00000011020	ENSDART00000018131	11	3	3	CCCCAACACAAAGAGGTCGAGGGG	6	+	156	669
ENSDARG00000011020	ENSDART00000018131	11	3	3	CCCAACACAAAGAGGTCGAGGGG	5	+	157	669
ENSDARG00000011020	ENSDART00000018131	11	3	3	ACCCCAACACAAAGAGGTCGAGGGG	7	+	155	669
ENSDARG00000011135	ENSDART00000003878	11	3	3	GTTCCAGACCTGTGTGTGAAGAA	5	+	146	699
ENSDARG00000011135	ENSDART00000003878	11	3	3	GTCAACACAACGAAGGTGGAGCT	5	+	430	699
ENSDARG00000011135	ENSDART00000003878	11	3	3	CTAGTCAACACAACGAAGGTGGA	5	+	427	699
ENSDARG00000011135	ENSDART00000003878	11	3	3	CACAACGACATGCATGCTGACAAC	6	+	400	699
ENSDARG00000011135	ENSDART00000003878	11	4	4	TACAGCACCAGTGGATGAAGAAGCA	7	+	692	699
ENSDARG00000011135	ENSDART00000081605	11	2	2	GTTCCAGACCTGTGTGTGAAGAA	5	+	107	660
ENSDARG00000011135	ENSDART00000081605	11	2	2	GTCAACACAACGAAGGTGGAGCT	5	+	391	660
ENSDARG00000011135	ENSDART00000081605	11	2	2	CTAGTCAACACAACGAAGGTGGA	5	+	388	660
ENSDARG00000011135	ENSDART00000081605	11	2	2	CACAACGACATGCATGCTGACAAC	6	+	361	660
ENSDARG00000011135	ENSDART00000081605	11	3	3	TACAGCACCAGTGGATGAAGAAGCA	7	+	653	660
ENSDARG00000011262	ENSDART00000017393	11	4	3	CCCATCATCCTCTGGGGCGATGTC	6	-	202	1359
ENSDARG00000011262	ENSDART00000017393	11	4	3	CGCCCCATCATCCTCTGGGGCGAT	6	-	205	1359
ENSDARG00000011262	ENSDART00000017393	11	4	3	GGCGCCCCATCATCCTCTGGGGCG	6	-	207	1359
ENSDARG00000011262	ENSDART00000017393	11	6	5	TTCTGCTTCTCAATTGTGTCTTT	5	-	334	1359
ENSDARG00000011262	ENSDART00000017393	11	9	8	TTCTCACACATCTCATTTGATGAT	6	-	660	1359
ENSDARG00000011262	ENSDART00000017393	11	9	8	AGAAAAACCTTGCTGTTAGAAGAG	6	-	702	1359
ENSDARG00000011262	ENSDART00000017393	11	12	11	GGCTTCAGCTCCAGAGGTGCAGGG	6	-	897	1359
ENSDARG00000011613	ENSDART00000017973	11	2	1	AACAACAACATGGCCGATGATTTG	6	+	1	1569
ENSDARG00000011613	ENSDART00000017973	11	4	3	AGCCGCAGCAAGGAGAGACGTCGCA	7	+	223	1569
ENSDARG00000011613	ENSDART00000017973	11	4	3	GCAAAAGTCGCAGCCGGAGTCGGG	6	+	122	1569
ENSDARG00000011613	ENSDART00000017973	11	11	10	AACAGCTTAATGGCTTTGAGTTG	5	+	923	1569
ENSDARG00000011613	ENSDART00000017973	11	16	15	AGCTTCTAATCCCCAGTCGTCGGT	6	+	1556	1569
ENSDARG00000011613	ENSDART00000079888	11	3	1	AACAACAACATGGCCGATGATTTG	6	+	1	1572
ENSDARG00000011613	ENSDART00000079888	11	5	3	AGCCGCAGCAAGGAGAGACGTCGCA	7	+	226	1572
ENSDARG00000011613	ENSDART00000079888	11	5	3	GCAAAAGTCGCAGCCGGAGTCGGG	6	+	125	1572
ENSDARG00000011613	ENSDART00000079888	11	12	10	AACAGCTTAATGGCTTTGAGTTG	5	+	926	1572
ENSDARG00000011613	ENSDART00000079888	11	17	15	AGCTTCTAATCCCCAGTCGTCGGT	6	+	1559	1572
ENSDARG00000011945	ENSDART00000027850	11	1	1	CGCTGCTACGAGCCTGGGGCGTC	5	+	191	1125
ENSDARG00000011945	ENSDART00000027850	11	3	3	TTATTCCCATCATCGGCGGAGTC	5	+	425	1125
ENSDARG00000011945	ENSDART00000027850	11	4	4	TTATGCTGCCCACATGGATTTTAG	6	+	617	1125
ENSDARG00000011945	ENSDART00000027850	11	5	5	TGCTGCTCCTCATCAGTGGTTTCT	6	+	707	1125
ENSDARG00000011945	ENSDART00000027850	11	5	5	AGCCCACTCAGTTACGCTGTAGCC	6	+	778	1125
ENSDARG00000011945	ENSDART00000027850	11	6	6	GGCCAAAAAGGGACTGCTGCCTGT	6	+	945	1125
ENSDARG00000012204	ENSDART00000005864	11	1	1	AACAAAGTCCAGCACCGCCGATTCT	7	+	43	1224
ENSDARG00000012204	ENSDART00000005864	11	2	2	GTCTCCCGCCAGAGTTTCTGAAGAA	7	+	113	1224
ENSDARG00000012204	ENSDART00000005864	11	2	2	CCCGCCAGAGTTTCTGAAGAAGTT	6	+	117	1224
ENSDARG00000012204	ENSDART00000005864	11	3	3	GCAGTCAGACATTGGCTTTGGGA	5	+	198	1224
ENSDARG00000012204	ENSDART00000005864	11	5	5	GCCTCACTCTTGTATTTGAGTAC	5	+	443	1224
ENSDARG00000012204	ENSDART00000005864	11	7	7	AACTCAAGCTGGCAGACTTTGGT	5	+	635	1224
ENSDARG00000012204	ENSDART00000005864	11	8	8	ATCGACCCCCTGATGTTCTGCTGGG	7	+	719	1224
ENSDARG00000012204	ENSDART00000005864	11	8	8	AACCTATTCGAACGAGGTGGTGAC	6	+	687	1224
ENSDARG00000012496	ENSDART00000023251	11	1	1	TTCTGCACAGTTTGTTTTTGTGTGC	7	+	664	1314
ENSDARG00000012496	ENSDART00000023251	11	1	1	TTATTCTGCACAGTTTGTTTTTGTG	7	+	661	1314
ENSDARG00000012496	ENSDART00000023251	11	1	1	GTTGTCAGCGGCTGTAATGGGAC	5	+	501	1314
ENSDARG00000012496	ENSDART00000023251	11	1	1	ATCGGCAGATTAGGGAAGAGTTG	5	+	1088	1314
ENSDARG00000012496	ENSDART00000023251	11	1	1	AGCCACAGCGGACATAGGAGAGTGT	7	+	628	1314
ENSDARG00000012506	ENSDART00000005616	11	1	1	TACTCAGACAAAGCCGAAGACGTC	6	+	37	1881
ENSDARG00000012506	ENSDART00000005616	11	1	1	GTACTCAGACAAAGCCGAAGACGTC	7	+	36	1881
ENSDARG00000012506	ENSDART00000005616	11	2	2	CTCAGCAGCAGTTCAGGTGAGGCC	6	+	519	1881
ENSDARG00000012506	ENSDART00000005616	11	2	2	CGCTCCTGCTTCCCGTGCTTTGAT	6	+	472	1881
ENSDARG00000012506	ENSDART00000005616	11	4	4	GAAGACTTCCTGTCTGTTGGAGAG	6	+	751	1881
ENSDARG00000012506	ENSDART00000005616	11	5	5	GTCACCAACGCCACGTGGGGGGA	5	+	955	1881
ENSDARG00000012506	ENSDART00000005616	11	5	5	CACCAACGCCACGTGGGGGGATTT	6	+	957	1881
ENSDARG00000012506	ENSDART00000005616	11	5	5	ACCAACGCCACGTGGGGGGATTT	5	+	958	1881
ENSDARG00000012506	ENSDART00000005616	11	5	5	ACCAACGCCACGTGGGGGGATTTC	6	+	958	1881
ENSDARG00000012506	ENSDART00000005616	11	5	5	CACCAACGCCACGTGGGGGGATTTC	7	+	957	1881
ENSDARG00000012506	ENSDART00000005616	11	5	5	GTCACCAACGCCACGTGGGGGGAT	6	+	955	1881
ENSDARG00000012506	ENSDART00000005616	11	8	8	AACGTCCACAAAATTGAGGGTGAC	6	+	1357	1881
ENSDARG00000012506	ENSDART00000005616	11	9	9	TCCGCCGGCCAGACTCTGATGAA	5	+	1438	1881
ENSDARG00000012506	ENSDART00000005616	11	9	9	AAACCAGCCGAGCTGTTAGCAGAG	6	+	1459	1881
ENSDARG00000012506	ENSDART00000005616	11	9	9	GAAGTCACCTCTTCCTGATGGTGCA	7	+	1584	1881
ENSDARG00000012506	ENSDART00000005616	11	9	9	GAAACCAGCCGAGCTGTTAGCAGAG	7	+	1458	1881
ENSDARG00000012514	ENSDART00000041144	11	1	1	TTCTGCTGCAGAGCGTCGGGGAT	5	+	104	1599
ENSDARG00000012514	ENSDART00000041144	11	1	1	TGCTGCAGAGCGTCGGGGATGAC	5	+	107	1599
ENSDARG00000012514	ENSDART00000041144	11	10	10	ATCTCAACCCTAATGGTGTTAAC	5	+	947	1599
ENSDARG00000012514	ENSDART00000041144	11	11	11	TTCCCAGCCTTTGGATTTGGTGCC	6	+	1033	1599
ENSDARG00000012514	ENSDART00000041144	11	13	13	CTCAACAACCAAATGCAGCAGTG	5	+	1244	1599
ENSDARG00000012514	ENSDART00000041144	11	13	13	CGCTCAACAACCAAATGCAGCAGTG	7	+	1242	1599
ENSDARG00000012514	ENSDART00000079290	11	4	1	TTCTGCTGCAGAGCGTCGGGGAT	5	+	104	1599
ENSDARG00000012514	ENSDART00000079290	11	4	1	TGCTGCAGAGCGTCGGGGATGAC	5	+	107	1599
ENSDARG00000012514	ENSDART00000079290	11	10	7	CACCGCTAAGCTAATGGAGGCTAA	6	+	705	1599
ENSDARG00000012514	ENSDART00000079290	11	13	10	ATCTCAACCCTAATGGTGTTAAC	5	+	944	1599
ENSDARG00000012514	ENSDART00000079290	11	14	11	TTCCCAGCCTTTGGATTTGGTGCC	6	+	1030	1599
ENSDARG00000012514	ENSDART00000079290	11	16	13	CTCAACAACCAAATGCAGCAGTG	5	+	1241	1599
ENSDARG00000012514	ENSDART00000079290	11	16	13	CGCTCAACAACCAAATGCAGCAGTG	7	+	1239	1599
ENSDARG00000012514	ENSDART00000087652	11	2	1	TTCTGCTGCAGAGCGTCGGGGAT	5	+	104	1599
ENSDARG00000012514	ENSDART00000087652	11	2	1	TGCTGCAGAGCGTCGGGGATGAC	5	+	107	1599
ENSDARG00000012514	ENSDART00000087652	11	8	7	CACCGCTAAGCTAATGGAGGCTAA	6	+	705	1599
ENSDARG00000012514	ENSDART00000087652	11	11	10	ATCTCAACCCTAATGGTGTTAAC	5	+	944	1599
ENSDARG00000012514	ENSDART00000087652	11	12	11	TTCCCAGCCTTTGGATTTGGTGCC	6	+	1030	1599
ENSDARG00000012514	ENSDART00000087652	11	14	13	CTCAACAACCAAATGCAGCAGTG	5	+	1241	1599
ENSDARG00000012514	ENSDART00000087652	11	14	13	CGCTCAACAACCAAATGCAGCAGTG	7	+	1239	1599
ENSDARG00000012514	ENSDART00000103513	11	2	2	TGCTGCAGAGCGTCGGGGATGAC	5	+	158	684
ENSDARG00000012514	ENSDART00000103513	11	2	2	TTCTGCTGCAGAGCGTCGGGGAT	5	+	155	684
ENSDARG00000012674	ENSDART00000020283	11	1	1	CAAAACAGCACCGAAAGCAGCAGAC	7	+	96	1074
ENSDARG00000012674	ENSDART00000020283	11	4	4	GACCTCAGCCGCACTTTAAGGTGAT	7	+	620	1074
ENSDARG00000012674	ENSDART00000020283	11	4	4	CTCAGCCGCACTTTAAGGTGATGTA	7	+	623	1074
ENSDARG00000012674	ENSDART00000020283	11	4	4	ACCTCAGCCGCACTTTAAGGTGAT	6	+	621	1074
ENSDARG00000012674	ENSDART00000020283	11	5	5	GACAACACCAGCGGCTGCAGTTTAG	7	+	745	1074
ENSDARG00000012674	ENSDART00000020283	11	5	5	ACCAGCGGCTGCAGTTTAGTGGAA	6	+	751	1074
ENSDARG00000012674	ENSDART00000020283	11	7	7	ATCAACGCATTGAAGAGGCTGGA	5	+	1039	1074
ENSDARG00000012674	ENSDART00000020283	11	7	7	TTCATCAACGCATTGAAGAGGCT	5	+	1036	1074
ENSDARG00000012949	ENSDART00000006669	11	2	2	GACAGCACCAATGACTTCTGGAGGC	7	+	226	669
ENSDARG00000012949	ENSDART00000006669	11	2	2	TTCAGCCCATCGGCACGTGTGAGAA	7	+	269	669
ENSDARG00000012949	ENSDART00000006669	11	2	2	GAATGCCTCTTCCTGGTGTATTG	5	+	150	669
ENSDARG00000012949	ENSDART00000006669	11	3	3	TTCCTATTAAAAACATTAAGTGGAG	7	+	355	669
ENSDARG00000012949	ENSDART00000006669	11	4	4	GACATCTTCCCCGTGGGCTGGTGTC	7	+	592	669
ENSDARG00000012949	ENSDART00000006669	11	4	4	GACATCTTCCCCGTGGGCTGGTGT	6	+	592	669
ENSDARG00000012949	ENSDART00000006669	11	4	4	ATCTTCCCCGTGGGCTGGTGTCAAC	7	+	595	669
ENSDARG00000012949	ENSDART00000006669	11	4	4	AAAATCTTCATCATGTTTGACGGT	6	+	526	669
ENSDARG00000013016	ENSDART00000019440	11	1	1	AGCTCCCGCGGAATCGGAGTTGGA	6	+	30	537
ENSDARG00000013016	ENSDART00000019440	11	1	1	AGCTCCCGCGGAATCGGAGTTGGAC	7	+	30	537
ENSDARG00000013016	ENSDART00000019440	11	1	1	GACCGCAGCGGGGCTGAAGAAGAG	6	+	52	537
ENSDARG00000013016	ENSDART00000019440	11	2	2	CCCTTCAACGCAAGGACTTGGGT	5	+	317	537
ENSDARG00000013016	ENSDART00000104403	11	1	1	GACCGCAGCGGGGCTGAAGAAGAG	6	+	52	381
ENSDARG00000013016	ENSDART00000104403	11	1	1	AGCTCCCGCGGAATCGGAGTTGGAC	7	+	30	381
ENSDARG00000013016	ENSDART00000104403	11	1	1	AGCTCCCGCGGAATCGGAGTTGGA	6	+	30	381
ENSDARG00000013016	ENSDART00000104403	11	2	2	CCCTTCAACGCAAGGACTTGGGT	5	+	317	381
ENSDARG00000013087	ENSDART00000016181	11	8	7	GACCCCTGCGCTGAGGGCTGGATAG	7	+	496	1093
ENSDARG00000013087	ENSDART00000016181	11	12	11	TTCCCCTGCGGTGGAGGCTGTGGTA	7	+	795	1093
ENSDARG00000013087	ENSDART00000016181	11	12	11	CACTTCCCCTGCGGTGGAGGCTGTG	7	+	792	1093
ENSDARG00000013087	ENSDART00000016181	11	12	11	CACTTCCCCTGCGGTGGAGGCTGT	6	+	792	1093
ENSDARG00000013087	ENSDART00000016181	11	12	11	AGACACTTCCCCTGCGGTGGAGGCT	7	+	789	1093
ENSDARG00000013087	ENSDART00000016181	11	12	11	AGACACTTCCCCTGCGGTGGAGGC	6	+	789	1093
ENSDARG00000013087	ENSDART00000103665	11	6	6	GACCCCTGCGCTGAGGGCTGGATAG	7	+	451	957
ENSDARG00000013087	ENSDART00000103665	11	10	10	TTCCCCTGCGGTGGAGGCTGTGGTA	7	+	750	957
ENSDARG00000013087	ENSDART00000103665	11	10	10	CACTTCCCCTGCGGTGGAGGCTGTG	7	+	747	957
ENSDARG00000013087	ENSDART00000103665	11	10	10	CACTTCCCCTGCGGTGGAGGCTGT	6	+	747	957
ENSDARG00000013087	ENSDART00000103665	11	10	10	AGACACTTCCCCTGCGGTGGAGGCT	7	+	744	957
ENSDARG00000013087	ENSDART00000103665	11	10	10	AGACACTTCCCCTGCGGTGGAGGC	6	+	744	957
ENSDARG00000013122	ENSDART00000006703	11	2	2	ACAAGCAGATGTTCAAGCAGTTTTG	7	+	128	741
ENSDARG00000013122	ENSDART00000006703	11	2	2	GCAACCGCATGTGTTGGAGGCTTT	6	+	162	741
ENSDARG00000013122	ENSDART00000006703	11	2	2	GCAACCGCATGTGTTGGAGGCTTTG	7	+	162	741
ENSDARG00000013122	ENSDART00000006703	11	2	2	GGCAACCGCATGTGTTGGAGGCTTT	7	+	161	741
ENSDARG00000013122	ENSDART00000006703	11	4	4	TACAGCCTCAGTTATGGGAAGCC	5	+	443	741
ENSDARG00000013122	ENSDART00000006703	11	4	4	GTCTGCTGCTGCTGGTGAAGCGTAC	7	+	411	741
ENSDARG00000013122	ENSDART00000006703	11	4	4	GTAAACAGCAGTTTGTCTGCTGCT	6	+	397	741
ENSDARG00000013122	ENSDART00000006703	11	4	4	ATCTACAGCCTCAGTTATGGGAA	5	+	440	741
ENSDARG00000013422	ENSDART00000042332	11	1	1	GAAGACACCCATGGAGTCTTGGAG	6	+	1783	2832
ENSDARG00000013422	ENSDART00000042332	11	1	1	GAAGGCACAGCCAAAGGTGGAGGA	6	+	1750	2832
ENSDARG00000013422	ENSDART00000042332	11	1	1	GAAGGCACAGCCAAAGGTGGAGGAG	7	+	1750	2832
ENSDARG00000013422	ENSDART00000042332	11	1	1	GCCCAAACACCATTGTGGGAAGTG	6	+	521	2832
ENSDARG00000013422	ENSDART00000042332	11	1	1	GGCCCAAACACCATTGTGGGAAGTG	7	+	520	2832
ENSDARG00000013422	ENSDART00000042332	11	1	1	GTCATCATCGGTCTCTGTGTCTCT	6	+	562	2832
ENSDARG00000013422	ENSDART00000042332	11	1	1	TTCAGCCCCAGAGATTCTGCTGTC	6	+	453	2832
ENSDARG00000013422	ENSDART00000042332	11	1	1	TTCTCAAGAGACATGTGGTGGTA	5	+	153	2832
ENSDARG00000013422	ENSDART00000042332	11	1	1	CTCCAAATCGAGCTTAGATGTAGAT	7	+	111	2832
ENSDARG00000013422	ENSDART00000042332	11	1	1	CTCAGCATCTTCCTCTTAGTTTTC	6	+	55	2832
ENSDARG00000013422	ENSDART00000042332	11	1	1	AACTACTACAGTTCGTATTTGGA	5	+	390	2832
ENSDARG00000013422	ENSDART00000042332	11	1	1	CTAGACTTATGACTGGTGCAGGA	5	+	1124	2832
ENSDARG00000013422	ENSDART00000042332	11	1	1	CCCAAACACCATTGTGGGAAGTG	5	+	522	2832
ENSDARG00000013422	ENSDART00000042332	11	1	1	AGCTCCAAATCGAGCTTAGATGTA	6	+	109	2832
ENSDARG00000013422	ENSDART00000042332	11	1	1	AGATTCTGCTGTCCGTGGTTGAA	5	+	464	2832
ENSDARG00000013422	ENSDART00000042332	11	1	1	AGAAGCATCCGGAAAAGGAGATGGA	7	+	1022	2832
ENSDARG00000013422	ENSDART00000042332	11	1	1	ACAGCCAAAGGTGGAGGAGAGGAC	6	+	1756	2832
ENSDARG00000013422	ENSDART00000042332	11	2	2	AACTTCTTCATAGAGCTGCAGGA	5	+	1879	2832
ENSDARG00000013422	ENSDART00000042332	11	6	6	CTCATCCCAAGGGGACGATGATGAT	7	+	2184	2832
ENSDARG00000013422	ENSDART00000042332	11	6	6	TTCTCATCCCAAGGGGACGATGAT	6	+	2182	2832
ENSDARG00000013422	ENSDART00000042332	11	7	7	ACACTCTTCACCATCTTTGCCTTC	6	+	2656	2832
ENSDARG00000013422	ENSDART00000042332	11	7	7	GCCGTCCTCATGTACCGCCGCAGGC	7	+	2689	2832
ENSDARG00000013422	ENSDART00000046410	11	1	1	GAAGGCACAGCCAAAGGTGGAGGA	6	+	1750	2088
ENSDARG00000013422	ENSDART00000046410	11	1	1	GAAGGCACAGCCAAAGGTGGAGGAG	7	+	1750	2088
ENSDARG00000013422	ENSDART00000046410	11	1	1	GCCCAAACACCATTGTGGGAAGTG	6	+	521	2088
ENSDARG00000013422	ENSDART00000046410	11	1	1	GGCCCAAACACCATTGTGGGAAGTG	7	+	520	2088
ENSDARG00000013422	ENSDART00000046410	11	1	1	GTCATCATCGGTCTCTGTGTCTCT	6	+	562	2088
ENSDARG00000013422	ENSDART00000046410	11	1	1	TTCAGCCCCAGAGATTCTGCTGTC	6	+	453	2088
ENSDARG00000013422	ENSDART00000046410	11	1	1	TTCTCAAGAGACATGTGGTGGTA	5	+	153	2088
ENSDARG00000013422	ENSDART00000046410	11	1	1	GAAGACACCCATGGAGTCTTGGAG	6	+	1783	2088
ENSDARG00000013422	ENSDART00000046410	11	1	1	CTCCAAATCGAGCTTAGATGTAGAT	7	+	111	2088
ENSDARG00000013422	ENSDART00000046410	11	1	1	CTCAGCATCTTCCTCTTAGTTTTC	6	+	55	2088
ENSDARG00000013422	ENSDART00000046410	11	1	1	AACTACTACAGTTCGTATTTGGA	5	+	390	2088
ENSDARG00000013422	ENSDART00000046410	11	1	1	ACAGCCAAAGGTGGAGGAGAGGAC	6	+	1756	2088
ENSDARG00000013422	ENSDART00000046410	11	1	1	AGAAGCATCCGGAAAAGGAGATGGA	7	+	1022	2088
ENSDARG00000013422	ENSDART00000046410	11	1	1	AGATTCTGCTGTCCGTGGTTGAA	5	+	464	2088
ENSDARG00000013422	ENSDART00000046410	11	1	1	AGCTCCAAATCGAGCTTAGATGTA	6	+	109	2088
ENSDARG00000013422	ENSDART00000046410	11	1	1	CCCAAACACCATTGTGGGAAGTG	5	+	522	2088
ENSDARG00000013422	ENSDART00000046410	11	1	1	CTAGACTTATGACTGGTGCAGGA	5	+	1124	2088
ENSDARG00000013422	ENSDART00000046800	11	2	1	GAAGACACCCATGGAGTCTTGGAG	6	+	1783	2913
ENSDARG00000013422	ENSDART00000046800	11	2	1	GAAGGCACAGCCAAAGGTGGAGGA	6	+	1750	2913
ENSDARG00000013422	ENSDART00000046800	11	2	1	GAAGGCACAGCCAAAGGTGGAGGAG	7	+	1750	2913
ENSDARG00000013422	ENSDART00000046800	11	2	1	GCCCAAACACCATTGTGGGAAGTG	6	+	521	2913
ENSDARG00000013422	ENSDART00000046800	11	2	1	GGCCCAAACACCATTGTGGGAAGTG	7	+	520	2913
ENSDARG00000013422	ENSDART00000046800	11	2	1	GTCATCATCGGTCTCTGTGTCTCT	6	+	562	2913
ENSDARG00000013422	ENSDART00000046800	11	2	1	TTCAGCCCCAGAGATTCTGCTGTC	6	+	453	2913
ENSDARG00000013422	ENSDART00000046800	11	2	1	CTCCAAATCGAGCTTAGATGTAGAT	7	+	111	2913
ENSDARG00000013422	ENSDART00000046800	11	2	1	CTCAGCATCTTCCTCTTAGTTTTC	6	+	55	2913
ENSDARG00000013422	ENSDART00000046800	11	2	1	AACTACTACAGTTCGTATTTGGA	5	+	390	2913
ENSDARG00000013422	ENSDART00000046800	11	2	1	TTCTCAAGAGACATGTGGTGGTA	5	+	153	2913
ENSDARG00000013422	ENSDART00000046800	11	2	1	ACAGCCAAAGGTGGAGGAGAGGAC	6	+	1756	2913
ENSDARG00000013422	ENSDART00000046800	11	2	1	AGAAGCATCCGGAAAAGGAGATGGA	7	+	1022	2913
ENSDARG00000013422	ENSDART00000046800	11	2	1	AGATTCTGCTGTCCGTGGTTGAA	5	+	464	2913
ENSDARG00000013422	ENSDART00000046800	11	2	1	AGCTCCAAATCGAGCTTAGATGTA	6	+	109	2913
ENSDARG00000013422	ENSDART00000046800	11	2	1	CCCAAACACCATTGTGGGAAGTG	5	+	522	2913
ENSDARG00000013422	ENSDART00000046800	11	2	1	CTAGACTTATGACTGGTGCAGGA	5	+	1124	2913
ENSDARG00000013422	ENSDART00000046800	11	9	8	TTCTCATCCCAAGGGGACGATGAT	6	+	2263	2913
ENSDARG00000013422	ENSDART00000046800	11	9	8	CTCATCCCAAGGGGACGATGATGAT	7	+	2265	2913
ENSDARG00000013422	ENSDART00000046800	11	10	9	ACACTCTTCACCATCTTTGCCTTC	6	+	2737	2913
ENSDARG00000013422	ENSDART00000046800	11	10	9	GCCGTCCTCATGTACCGCCGCAGGC	7	+	2770	2913
ENSDARG00000013422	ENSDART00000049899	11	1	1	GAAGACACCCATGGAGTCTTGGAG	6	+	1783	2907
ENSDARG00000013422	ENSDART00000049899	11	1	1	GAAGGCACAGCCAAAGGTGGAGGA	6	+	1750	2907
ENSDARG00000013422	ENSDART00000049899	11	1	1	GAAGGCACAGCCAAAGGTGGAGGAG	7	+	1750	2907
ENSDARG00000013422	ENSDART00000049899	11	1	1	GCCCAAACACCATTGTGGGAAGTG	6	+	521	2907
ENSDARG00000013422	ENSDART00000049899	11	1	1	GGCCCAAACACCATTGTGGGAAGTG	7	+	520	2907
ENSDARG00000013422	ENSDART00000049899	11	1	1	GTCATCATCGGTCTCTGTGTCTCT	6	+	562	2907
ENSDARG00000013422	ENSDART00000049899	11	1	1	TTCAGCCCCAGAGATTCTGCTGTC	6	+	453	2907
ENSDARG00000013422	ENSDART00000049899	11	1	1	TTCTCAAGAGACATGTGGTGGTA	5	+	153	2907
ENSDARG00000013422	ENSDART00000049899	11	1	1	CTCCAAATCGAGCTTAGATGTAGAT	7	+	111	2907
ENSDARG00000013422	ENSDART00000049899	11	1	1	CTCAGCATCTTCCTCTTAGTTTTC	6	+	55	2907
ENSDARG00000013422	ENSDART00000049899	11	1	1	AACTACTACAGTTCGTATTTGGA	5	+	390	2907
ENSDARG00000013422	ENSDART00000049899	11	1	1	ACAGCCAAAGGTGGAGGAGAGGAC	6	+	1756	2907
ENSDARG00000013422	ENSDART00000049899	11	1	1	AGAAGCATCCGGAAAAGGAGATGGA	7	+	1022	2907
ENSDARG00000013422	ENSDART00000049899	11	1	1	AGATTCTGCTGTCCGTGGTTGAA	5	+	464	2907
ENSDARG00000013422	ENSDART00000049899	11	1	1	AGCTCCAAATCGAGCTTAGATGTA	6	+	109	2907
ENSDARG00000013422	ENSDART00000049899	11	1	1	CCCAAACACCATTGTGGGAAGTG	5	+	522	2907
ENSDARG00000013422	ENSDART00000049899	11	1	1	CTAGACTTATGACTGGTGCAGGA	5	+	1124	2907
ENSDARG00000013422	ENSDART00000049899	11	9	9	GCCGTCCTCATGTACCGCCGCAGGC	7	+	2764	2907
ENSDARG00000013422	ENSDART00000049899	11	9	9	ACACTCTTCACCATCTTTGCCTTC	6	+	2731	2907
ENSDARG00000013422	ENSDART00000089803	11	2	1	GAAGACACCCATGGAGTCTTGGAG	6	+	1783	2928
ENSDARG00000013422	ENSDART00000089803	11	2	1	GAAGGCACAGCCAAAGGTGGAGGA	6	+	1750	2928
ENSDARG00000013422	ENSDART00000089803	11	2	1	GAAGGCACAGCCAAAGGTGGAGGAG	7	+	1750	2928
ENSDARG00000013422	ENSDART00000089803	11	2	1	GCCCAAACACCATTGTGGGAAGTG	6	+	521	2928
ENSDARG00000013422	ENSDART00000089803	11	2	1	GGCCCAAACACCATTGTGGGAAGTG	7	+	520	2928
ENSDARG00000013422	ENSDART00000089803	11	2	1	GTCATCATCGGTCTCTGTGTCTCT	6	+	562	2928
ENSDARG00000013422	ENSDART00000089803	11	2	1	TTCAGCCCCAGAGATTCTGCTGTC	6	+	453	2928
ENSDARG00000013422	ENSDART00000089803	11	2	1	TTCTCAAGAGACATGTGGTGGTA	5	+	153	2928
ENSDARG00000013422	ENSDART00000089803	11	2	1	CTCCAAATCGAGCTTAGATGTAGAT	7	+	111	2928
ENSDARG00000013422	ENSDART00000089803	11	2	1	AACTACTACAGTTCGTATTTGGA	5	+	390	2928
ENSDARG00000013422	ENSDART00000089803	11	2	1	ACAGCCAAAGGTGGAGGAGAGGAC	6	+	1756	2928
ENSDARG00000013422	ENSDART00000089803	11	2	1	AGAAGCATCCGGAAAAGGAGATGGA	7	+	1022	2928
ENSDARG00000013422	ENSDART00000089803	11	2	1	AGATTCTGCTGTCCGTGGTTGAA	5	+	464	2928
ENSDARG00000013422	ENSDART00000089803	11	2	1	AGCTCCAAATCGAGCTTAGATGTA	6	+	109	2928
ENSDARG00000013422	ENSDART00000089803	11	2	1	CCCAAACACCATTGTGGGAAGTG	5	+	522	2928
ENSDARG00000013422	ENSDART00000089803	11	2	1	CTAGACTTATGACTGGTGCAGGA	5	+	1124	2928
ENSDARG00000013422	ENSDART00000089803	11	2	1	CTCAGCATCTTCCTCTTAGTTTTC	6	+	55	2928
ENSDARG00000013422	ENSDART00000089803	11	10	9	TTCTCATCCCAAGGGGACGATGAT	6	+	2278	2928
ENSDARG00000013422	ENSDART00000089803	11	10	9	CTCATCCCAAGGGGACGATGATGAT	7	+	2280	2928
ENSDARG00000013422	ENSDART00000089803	11	11	10	ACACTCTTCACCATCTTTGCCTTC	6	+	2752	2928
ENSDARG00000013422	ENSDART00000089803	11	11	10	GCCGTCCTCATGTACCGCCGCAGGC	7	+	2785	2928
ENSDARG00000013422	ENSDART00000103247	11	1	1	GAAGGCACAGCCAAAGGTGGAGGA	6	+	1750	2079
ENSDARG00000013422	ENSDART00000103247	11	1	1	GAAGGCACAGCCAAAGGTGGAGGAG	7	+	1750	2079
ENSDARG00000013422	ENSDART00000103247	11	1	1	GCCCAAACACCATTGTGGGAAGTG	6	+	521	2079
ENSDARG00000013422	ENSDART00000103247	11	1	1	GGCCCAAACACCATTGTGGGAAGTG	7	+	520	2079
ENSDARG00000013422	ENSDART00000103247	11	1	1	GTCATCATCGGTCTCTGTGTCTCT	6	+	562	2079
ENSDARG00000013422	ENSDART00000103247	11	1	1	TTCAGCCCCAGAGATTCTGCTGTC	6	+	453	2079
ENSDARG00000013422	ENSDART00000103247	11	1	1	TTCTCAAGAGACATGTGGTGGTA	5	+	153	2079
ENSDARG00000013422	ENSDART00000103247	11	1	1	GAAGACACCCATGGAGTCTTGGAG	6	+	1783	2079
ENSDARG00000013422	ENSDART00000103247	11	1	1	CTCCAAATCGAGCTTAGATGTAGAT	7	+	111	2079
ENSDARG00000013422	ENSDART00000103247	11	1	1	CTCAGCATCTTCCTCTTAGTTTTC	6	+	55	2079
ENSDARG00000013422	ENSDART00000103247	11	1	1	AACTACTACAGTTCGTATTTGGA	5	+	390	2079
ENSDARG00000013422	ENSDART00000103247	11	1	1	ACAGCCAAAGGTGGAGGAGAGGAC	6	+	1756	2079
ENSDARG00000013422	ENSDART00000103247	11	1	1	AGAAGCATCCGGAAAAGGAGATGGA	7	+	1022	2079
ENSDARG00000013422	ENSDART00000103247	11	1	1	AGATTCTGCTGTCCGTGGTTGAA	5	+	464	2079
ENSDARG00000013422	ENSDART00000103247	11	1	1	AGCTCCAAATCGAGCTTAGATGTA	6	+	109	2079
ENSDARG00000013422	ENSDART00000103247	11	1	1	CCCAAACACCATTGTGGGAAGTG	5	+	522	2079
ENSDARG00000013422	ENSDART00000103247	11	1	1	CTAGACTTATGACTGGTGCAGGA	5	+	1124	2079
ENSDARG00000013422	ENSDART00000103251	11	1	1	GAAGACACCCATGGAGTCTTGGAG	6	+	1783	2928
ENSDARG00000013422	ENSDART00000103251	11	1	1	GAAGGCACAGCCAAAGGTGGAGGA	6	+	1750	2928
ENSDARG00000013422	ENSDART00000103251	11	1	1	GAAGGCACAGCCAAAGGTGGAGGAG	7	+	1750	2928
ENSDARG00000013422	ENSDART00000103251	11	1	1	GCCCAAACACCATTGTGGGAAGTG	6	+	521	2928
ENSDARG00000013422	ENSDART00000103251	11	1	1	GGCCCAAACACCATTGTGGGAAGTG	7	+	520	2928
ENSDARG00000013422	ENSDART00000103251	11	1	1	GTCATCATCGGTCTCTGTGTCTCT	6	+	562	2928
ENSDARG00000013422	ENSDART00000103251	11	1	1	TTCAGCCCCAGAGATTCTGCTGTC	6	+	453	2928
ENSDARG00000013422	ENSDART00000103251	11	1	1	TTCTCAAGAGACATGTGGTGGTA	5	+	153	2928
ENSDARG00000013422	ENSDART00000103251	11	1	1	CTCCAAATCGAGCTTAGATGTAGAT	7	+	111	2928
ENSDARG00000013422	ENSDART00000103251	11	1	1	AACTACTACAGTTCGTATTTGGA	5	+	390	2928
ENSDARG00000013422	ENSDART00000103251	11	1	1	ACAGCCAAAGGTGGAGGAGAGGAC	6	+	1756	2928
ENSDARG00000013422	ENSDART00000103251	11	1	1	AGAAGCATCCGGAAAAGGAGATGGA	7	+	1022	2928
ENSDARG00000013422	ENSDART00000103251	11	1	1	AGATTCTGCTGTCCGTGGTTGAA	5	+	464	2928
ENSDARG00000013422	ENSDART00000103251	11	1	1	AGCTCCAAATCGAGCTTAGATGTA	6	+	109	2928
ENSDARG00000013422	ENSDART00000103251	11	1	1	CCCAAACACCATTGTGGGAAGTG	5	+	522	2928
ENSDARG00000013422	ENSDART00000103251	11	1	1	CTAGACTTATGACTGGTGCAGGA	5	+	1124	2928
ENSDARG00000013422	ENSDART00000103251	11	1	1	CTCAGCATCTTCCTCTTAGTTTTC	6	+	55	2928
ENSDARG00000013422	ENSDART00000103251	11	9	9	TTCTCATCCCAAGGGGACGATGAT	6	+	2278	2928
ENSDARG00000013422	ENSDART00000103251	11	9	9	CTCATCCCAAGGGGACGATGATGAT	7	+	2280	2928
ENSDARG00000013422	ENSDART00000103251	11	10	10	ACACTCTTCACCATCTTTGCCTTC	6	+	2752	2928
ENSDARG00000013422	ENSDART00000103251	11	10	10	GCCGTCCTCATGTACCGCCGCAGGC	7	+	2785	2928
ENSDARG00000013477	ENSDART00000013714	11	2	1	ATCTACATCAACGGGTGGCAGTA	5	-	98	1254
ENSDARG00000013477	ENSDART00000013714	11	2	1	TACATCAACGGGTGGCAGTAAAC	5	-	95	1254
ENSDARG00000013477	ENSDART00000013714	11	3	2	GACTCAGCATGTGTGGAGAAGGG	5	-	558	1254
ENSDARG00000013477	ENSDART00000013714	11	3	2	GAAGCCCTCTTTGGGGGAGGTGAA	6	-	403	1254
ENSDARG00000013477	ENSDART00000013714	11	4	3	GACGCCACAGAGGGGTGGCGGTGGC	7	-	736	1254
ENSDARG00000013477	ENSDART00000013714	11	4	3	GACGCCACAGAGGGGTGGCGGTG	5	-	738	1254
ENSDARG00000013477	ENSDART00000013714	11	4	3	CTCGACGCCACAGAGGGGTGGCGGT	7	-	739	1254
ENSDARG00000013477	ENSDART00000013714	11	4	3	CTCGACGCCACAGAGGGGTGGCG	5	-	741	1254
ENSDARG00000013477	ENSDART00000013714	11	4	3	CGCCACAGAGGGGTGGCGGTGGCA	6	-	735	1254
ENSDARG00000013477	ENSDART00000013714	11	4	3	CGCCACAGAGGGGTGGCGGTGGC	5	-	736	1254
ENSDARG00000013477	ENSDART00000013714	11	5	4	TGCGTCTCCATAGTGTTGTAGTA	5	-	903	1254
ENSDARG00000013477	ENSDART00000013714	11	6	5	CGCTCCTACATGCTCATCTGGAGGT	7	-	1107	1254
ENSDARG00000013653	ENSDART00000009859	11	1	1	AACTCCTGCTTTTCGCTGGTAGGTA	7	+	14	2181
ENSDARG00000013653	ENSDART00000009859	11	3	3	AACTGCACCAACTATGTTGGCGGT	6	+	211	2181
ENSDARG00000013653	ENSDART00000009859	11	3	3	TGCACCAACTATGTTGGCGGTTAC	6	+	214	2181
ENSDARG00000013653	ENSDART00000009859	11	5	5	AACAGCACACTGGAAAGAGTGAGTT	7	+	514	2181
ENSDARG00000013653	ENSDART00000009859	11	7	7	TCCTTCACACAGCAGAGAAGGAAAC	7	+	797	2181
ENSDARG00000013653	ENSDART00000009859	11	7	7	ACATGCTACTCAGATGCAGGTGCA	6	+	846	2181
ENSDARG00000013653	ENSDART00000009859	11	11	11	CTCATCTGCCTGTCCATGTGTATTT	7	+	1435	2181
ENSDARG00000013653	ENSDART00000009859	11	12	12	TTCTACGCATTTGGTTATGGGAG	5	+	1717	2181
ENSDARG00000013653	ENSDART00000009859	11	12	12	CACTACTTCTTCTTGGCTGCATTT	6	+	1612	2181
ENSDARG00000013653	ENSDART00000009859	11	12	12	TACTTCTTCTTGGCTGCATTTGCT	6	+	1615	2181
ENSDARG00000013653	ENSDART00000009859	11	14	14	TTAATCTGCTGGCATTTGCTGTG	5	+	1871	2181
ENSDARG00000013676	ENSDART00000005231	11	2	2	AGAGTCAACAAATGAGGGTGAGCT	6	+	155	609
ENSDARG00000013676	ENSDART00000005231	11	4	4	TGCAAAAGCAGTTGGATGTTGTA	5	+	275	609
ENSDARG00000013694	ENSDART00000019248	11	5	5	TCCTCATCCCACAGTGGAAGAAGGT	7	+	539	894
ENSDARG00000013694	ENSDART00000019248	11	5	5	CTCCTCATCCCACAGTGGAAGAA	5	+	538	894
ENSDARG00000013694	ENSDART00000019248	11	5	5	CTCATCCCACAGTGGAAGAAGGT	5	+	541	894
ENSDARG00000013694	ENSDART00000019248	11	7	7	ACAAAAGCCAAACTGGAGGAGAG	5	+	688	894
ENSDARG00000013694	ENSDART00000019248	11	7	7	AACAAAAGCCAAACTGGAGGAGAG	6	+	687	894
ENSDARG00000013776	ENSDART00000046670	11	7	7	AAAGTCAGAATGCGTGCTGAAGCC	6	-	784	2031
ENSDARG00000013776	ENSDART00000046670	11	7	7	AGCTCCTTCAGGATAGCAGAGTTC	6	-	726	2031
ENSDARG00000013776	ENSDART00000046670	11	9	9	TTCCACTTCATCATGCTGCAGCA	5	-	1358	2031
ENSDARG00000013776	ENSDART00000046670	11	9	9	TGCTGCAGCAGGGATGGTGCATCT	6	-	1344	2031
ENSDARG00000013776	ENSDART00000046670	11	9	9	GGCAGCCACGGCCATCTGCCGGG	5	-	1292	2031
ENSDARG00000013776	ENSDART00000046670	11	9	9	CACTTCATCATGCTGCAGCAGGG	5	-	1355	2031
ENSDARG00000013776	ENSDART00000046670	11	10	10	TTCTCCAACATCTGAGATGGAGCT	6	-	1479	2031
ENSDARG00000013776	ENSDART00000046670	11	12	12	TACGCCTTCTTGTTTGAAGCGGGC	6	-	1846	2031
ENSDARG00000013776	ENSDART00000103394	11	9	9	AAAGTCAGAATGCGTGCTGAAGCC	6	-	811	2058
ENSDARG00000013776	ENSDART00000103394	11	9	9	AGCTCCTTCAGGATAGCAGAGTTC	6	-	753	2058
ENSDARG00000013776	ENSDART00000103394	11	11	11	TTCCACTTCATCATGCTGCAGCA	5	-	1385	2058
ENSDARG00000013776	ENSDART00000103394	11	11	11	TGCTGCAGCAGGGATGGTGCATCT	6	-	1371	2058
ENSDARG00000013776	ENSDART00000103394	11	11	11	GGCAGCCACGGCCATCTGCCGGG	5	-	1319	2058
ENSDARG00000013776	ENSDART00000103394	11	11	11	CACTTCATCATGCTGCAGCAGGG	5	-	1382	2058
ENSDARG00000013776	ENSDART00000103394	11	12	12	TTCTCCAACATCTGAGATGGAGCT	6	-	1506	2058
ENSDARG00000013776	ENSDART00000103394	11	14	14	TACGCCTTCTTGTTTGAAGCGGGC	6	-	1873	2058
ENSDARG00000014138	ENSDART00000027386	11	2	2	AGCTGCAGCCAATTCAGTTGCTGAA	7	+	213	963
ENSDARG00000014138	ENSDART00000027386	11	3	3	TGCAGCAGCCCAGTCCTCTGGAGCA	7	+	407	963
ENSDARG00000014138	ENSDART00000027386	11	3	3	TCCCTCCGCCAGACACTCTGCTGAC	7	+	452	963
ENSDARG00000014138	ENSDART00000027386	11	3	3	CGCGACGGCCGCAGTTTTTGTGTGC	7	+	322	963
ENSDARG00000014138	ENSDART00000027386	11	3	3	CCCTCCGCCAGACACTCTGCTGAC	6	+	453	963
ENSDARG00000014138	ENSDART00000027386	11	3	3	ACACTCTGCTGACCGTGGAGGAGCT	7	+	464	963
ENSDARG00000014138	ENSDART00000027386	11	3	3	ACACTCTGCTGACCGTGGAGGAG	5	+	464	963
ENSDARG00000014138	ENSDART00000027386	11	4	4	GCAGACAACACTCGGCAGGGTCT	5	+	520	963
ENSDARG00000014138	ENSDART00000027386	11	4	4	GGCAAAAACACTGATCTGGGTGC	5	+	624	963
ENSDARG00000014138	ENSDART00000027386	11	5	5	TACCCAAACTACAGGTCGCAGTT	5	+	748	963
ENSDARG00000014138	ENSDART00000027386	11	5	5	GTACCCAAACTACAGGTCGCAGTT	6	+	747	963
ENSDARG00000014138	ENSDART00000027386	11	5	5	AACTGCACCGCTGTGTGGCAGCG	5	+	683	963
ENSDARG00000014138	ENSDART00000027386	11	6	6	TCCTGCGCACAAGAGGGAGTGATAC	7	+	919	963
ENSDARG00000014138	ENSDART00000027386	11	6	6	AGAGGCTTCGTCCAGGGCCGCTTGT	7	+	868	963
ENSDARG00000014324	ENSDART00000003211	11	3	2	AGAGACTTCAGCTGAGTGTGCAGCT	7	-	149	1224
ENSDARG00000014324	ENSDART00000003211	11	3	2	GACTTCAGCTGAGTGTGCAGCTGTT	7	-	146	1224
ENSDARG00000014324	ENSDART00000003211	11	5	4	GGCATCAGAGGGACGGGCGGTGGA	6	-	292	1224
ENSDARG00000014324	ENSDART00000003211	11	5	4	GGCATCAGAGGGACGGGCGGTGGAC	7	-	291	1224
ENSDARG00000014324	ENSDART00000003211	11	5	4	AGACTCGACACATCGCATGAGCC	5	-	264	1224
[truncated: 8,671 more rows]
