# Supplementary material for: Rapid Mutation of Endogenous Zebrafish Genes Using Zinc Finger Nucleases Made by Oligomerized Pool ENgineering (OPEN)
Source: PLoS One. 2009 Feb 9;4(2):e4348. doi: 10.1371/journal.pone.0004348 (PMC2634973; doi:10.1371/journal.pone.0004348)
Supplement: Table S17 — Potential OPEN ZFN target sites in gene transcripts encoded on zebrafish chromosome 17. Data presented as described in the legend to Table S1. (2.02 MB XLS) [file pone.0004348.s017.xls]

## Sheet: Chromosome17
Gene ID	Transcript ID	Chromosome Number	Exon Number	Coding Exon Number	TargetSite	ZFN Spacer Length	Strand	ZFN Cleavage Site	Coding Sequence Length
ENSDARG00000000779	ENSDART00000000853	17	6	6	AACTTCATCACACTTGAGGATGAT	6	+	433	1896
ENSDARG00000000779	ENSDART00000000853	17	8	8	GAATGCTGCCGAAATGGTAGCAGTG	7	+	624	1896
ENSDARG00000000779	ENSDART00000000853	17	11	11	GACTTCCACCTGAACCGAGTGAGTG	7	+	835	1896
ENSDARG00000000779	ENSDART00000000853	17	11	11	CACTGCTGCTGACAAGTTTTGGCA	6	+	936	1896
ENSDARG00000000779	ENSDART00000000853	17	12	12	TTCAGCCCATTCCCAGAGGTTGCA	6	+	970	1896
ENSDARG00000000779	ENSDART00000000853	17	12	12	AGCCCATTCCCAGAGGTTGCAGAA	6	+	973	1896
ENSDARG00000000779	ENSDART00000000853	17	16	16	AACGGCAGAGGATAAGATGAGGCT	6	+	1323	1896
ENSDARG00000000779	ENSDART00000000853	17	18	18	AGCCAATTACGGGAGCAGTGGAG	5	+	1497	1896
ENSDARG00000000779	ENSDART00000000853	17	19	19	ACCGGCTCCCAGTTTGTGATGGA	5	+	1555	1896
ENSDARG00000000779	ENSDART00000104166	17	6	6	AACTTCATCACACTTGAGGATGAT	6	+	433	1896
ENSDARG00000000779	ENSDART00000104166	17	8	8	GAATGCTGCCGAAATGGTAGCAGTG	7	+	624	1896
ENSDARG00000000779	ENSDART00000104166	17	11	11	GACTTCCACCTGAACCGAGTGAGTG	7	+	835	1896
ENSDARG00000000779	ENSDART00000104166	17	11	11	CACTGCTGCTGACAAGTTTTGGCA	6	+	936	1896
ENSDARG00000000779	ENSDART00000104166	17	12	12	TTCAGCCCATTCCCAGAGGTTGCA	6	+	970	1896
ENSDARG00000000779	ENSDART00000104166	17	12	12	AGCCCATTCCCAGAGGTTGCAGAA	6	+	973	1896
ENSDARG00000000779	ENSDART00000104166	17	16	16	AACGGCAGAGGATAAGATGAGGCT	6	+	1323	1896
ENSDARG00000000779	ENSDART00000104166	17	18	18	AGCCAATTACGGGAGCAGTGGAG	5	+	1497	1896
ENSDARG00000000779	ENSDART00000104166	17	19	19	ACCGGCTCCCAGTTTGTGATGGA	5	+	1555	1896
ENSDARG00000000837	ENSDART00000000924	17	5	5	CACTACACAATCTAACTGTGTTTGT	7	-	399	1422
ENSDARG00000000837	ENSDART00000000924	17	5	5	ACAATCTAACTGTGTTTGTGGAT	5	-	395	1422
ENSDARG00000000837	ENSDART00000000924	17	7	7	TGCACCTTCTCGTCTCTGTAGTT	5	-	724	1422
ENSDARG00000000837	ENSDART00000000924	17	10	10	TACTCCTTCTGCAATGCTGTTGGT	6	-	942	1422
ENSDARG00000000837	ENSDART00000055396	17	13	13	ACAATCTAACTGTGTTTGTGGAT	5	-	716	1758
ENSDARG00000000837	ENSDART00000055396	17	13	13	CACTACACAATCTAACTGTGTTTGT	7	-	720	1758
ENSDARG00000000837	ENSDART00000055396	17	15	15	TGCACCTTCTCGTCTCTGTAGTT	5	-	1045	1758
ENSDARG00000000837	ENSDART00000055396	17	18	18	TACTCCTTCTGCAATGCTGTTGGT	6	-	1263	1758
ENSDARG00000000837	ENSDART00000077488	17	7	7	ACAATCTAACTGTGTTTGTGGAT	5	-	632	1686
ENSDARG00000000837	ENSDART00000077488	17	7	7	CACTACACAATCTAACTGTGTTTGT	7	-	636	1686
ENSDARG00000000837	ENSDART00000077488	17	9	9	TGCACCTTCTCGTCTCTGTAGTT	5	-	961	1686
ENSDARG00000000837	ENSDART00000077488	17	12	12	TACTCCTTCTGCAATGCTGTTGGT	6	-	1179	1686
ENSDARG00000000837	ENSDART00000104474	17	11	11	CACTACACAATCTAACTGTGTTTGT	7	-	723	1761
ENSDARG00000000837	ENSDART00000104474	17	11	11	ACAATCTAACTGTGTTTGTGGAT	5	-	719	1761
ENSDARG00000000837	ENSDART00000104474	17	13	13	TGCACCTTCTCGTCTCTGTAGTT	5	-	1048	1761
ENSDARG00000000837	ENSDART00000104474	17	16	16	TACTCCTTCTGCAATGCTGTTGGT	6	-	1266	1761
ENSDARG00000000837	ENSDART00000104476	17	17	17	CACTACACAATCTAACTGTGTTTGT	7	-	810	1848
ENSDARG00000000837	ENSDART00000104476	17	17	17	ACAATCTAACTGTGTTTGTGGAT	5	-	806	1848
ENSDARG00000000837	ENSDART00000104476	17	19	19	TGCACCTTCTCGTCTCTGTAGTT	5	-	1135	1848
ENSDARG00000000837	ENSDART00000104476	17	22	22	TACTCCTTCTGCAATGCTGTTGGT	6	-	1353	1848
ENSDARG00000001129	ENSDART00000045881	17	2	2	TTCCCATTCTCGCCACGAATTTGGT	7	-	227	5595
ENSDARG00000001129	ENSDART00000045881	17	5	5	AGAATCTTCTCCAGGTTCTGAATTT	7	-	632	5595
ENSDARG00000001129	ENSDART00000045881	17	5	5	AGCACCACAAGATCAGTGGCAGTT	6	-	672	5595
ENSDARG00000001129	ENSDART00000045881	17	6	6	TCCTCACGCGGCTGCGACGCATAC	6	-	702	5595
ENSDARG00000001129	ENSDART00000045881	17	6	6	TCCAGCACCTCCTCACGCGGCTGCG	7	-	710	5595
ENSDARG00000001129	ENSDART00000045881	17	6	6	CACCTCCTCACGCGGCTGCGACGCA	7	-	705	5595
ENSDARG00000001129	ENSDART00000045881	17	7	7	AGAATCTCCAAAAGTCTGATGAC	5	-	1096	5595
ENSDARG00000001129	ENSDART00000045881	17	7	7	TTCCACAGAGGATATTTGTGAAC	5	-	1278	5595
ENSDARG00000001129	ENSDART00000045881	17	8	8	ACCTCCATCTGCTTGTTGCGAGGCT	7	-	1430	5595
ENSDARG00000001129	ENSDART00000045881	17	8	8	TCCATCTGCTTGTTGCGAGGCTGGT	7	-	1427	5595
ENSDARG00000001129	ENSDART00000045881	17	8	8	GAACTCCACCTCCATCTGCTTGT	5	-	1439	5595
ENSDARG00000001129	ENSDART00000045881	17	9	9	GCCTTCCTCCACAATGCTGGTTGC	6	-	1519	5595
ENSDARG00000001129	ENSDART00000045881	17	12	12	TGCTCACCAATTTTGTGGAGTTT	5	-	2068	5595
ENSDARG00000001129	ENSDART00000045881	17	12	12	TGCTCACCAATTTTGTGGAGTTTTT	7	-	2066	5595
ENSDARG00000001129	ENSDART00000045881	17	14	14	TTCCTCCGCCGGAAGTTGAGTTC	5	-	2317	5595
ENSDARG00000001129	ENSDART00000045881	17	14	14	AGCTTCCTCCGCCGGAAGTTGAG	5	-	2320	5595
ENSDARG00000001129	ENSDART00000045881	17	15	15	TTCTGCAGCTCAATGGAGATGGT	5	-	2443	5595
ENSDARG00000001129	ENSDART00000045881	17	15	15	TCCAGCTGCTCCGCACTTAGACTAA	7	-	2474	5595
ENSDARG00000001129	ENSDART00000045881	17	16	16	GTAGTCCTCCAATTTGAAGATGAA	6	-	2725	5595
ENSDARG00000001129	ENSDART00000045881	17	17	17	GTCCACATCCAGTAGGGGCTGAT	5	-	2918	5595
ENSDARG00000001129	ENSDART00000045881	17	17	17	GCAAAAGTCTCGTACTCTGGAGAG	6	-	2850	5595
ENSDARG00000001129	ENSDART00000045881	17	18	18	TTCTCCGCACTGCTGAGAGGAAGGG	7	-	2999	5595
ENSDARG00000001129	ENSDART00000045881	17	19	19	TCCTCCACAAAGAGGCTGGGATGGG	7	-	3091	5595
ENSDARG00000001129	ENSDART00000045881	17	19	19	GCCAGCATCGATGGCTGTCTGAGAC	7	-	3180	5595
ENSDARG00000001129	ENSDART00000045881	17	19	19	TTCCTCCACAAAGAGGCTGGGAT	5	-	3094	5595
ENSDARG00000001129	ENSDART00000045881	17	19	19	CTCCACAAAGAGGCTGGGATGGG	5	-	3091	5595
ENSDARG00000001129	ENSDART00000045881	17	19	19	CCCTACGCCAGCATCGATGGCTGT	6	-	3187	5595
ENSDARG00000001129	ENSDART00000045881	17	19	19	CCCCTACGCCAGCATCGATGGCTGT	7	-	3187	5595
ENSDARG00000001129	ENSDART00000045881	17	19	19	CTCCACAAAGAGGCTGGGATGGGGT	7	-	3089	5595
ENSDARG00000001129	ENSDART00000045881	17	20	20	TTCTTCACATGTGGGTCGCAGAG	5	-	3679	5595
ENSDARG00000001129	ENSDART00000045881	17	20	20	TACTGCAGCTCTCGGGGGCAGTG	5	-	3363	5595
ENSDARG00000001129	ENSDART00000045881	17	20	20	GCAAACGTCACTTCTGTGAGGGA	5	-	3524	5595
ENSDARG00000001129	ENSDART00000045881	17	20	20	GAAGCCGTCACTGGCGTTGGAGAG	6	-	3862	5595
ENSDARG00000001129	ENSDART00000045881	17	22	22	ACCCCCGTCTGGCGAGAAGTGGGA	6	-	4405	5595
ENSDARG00000001129	ENSDART00000045881	17	22	22	AGAGCCTCCCGAACTCTGCTTCT	5	-	4718	5595
ENSDARG00000001129	ENSDART00000045881	17	22	22	CTCGTCAGCACCCCCGTCTGGCGAG	7	-	4413	5595
ENSDARG00000001129	ENSDART00000045881	17	22	22	CTCGTCTTCGTCATCGCTGGCTTT	6	-	4180	5595
ENSDARG00000001129	ENSDART00000045881	17	22	22	GAACTCTGCTTCTCCGGTGGTAGCA	7	-	4706	5595
ENSDARG00000001129	ENSDART00000045881	17	22	22	GAAGCCAGAGATGAGGTGGTTGAG	6	-	4813	5595
ENSDARG00000001129	ENSDART00000045881	17	22	22	GCCTGCAGCAGGTACGCCTTGTTC	6	-	4872	5595
ENSDARG00000001129	ENSDART00000045881	17	23	23	AAAATCGTCGATCACGTGGAAGAG	6	-	5131	5595
ENSDARG00000001129	ENSDART00000045881	17	24	24	ATCTTCCTCCGATCGGCGAAGCT	5	-	5201	5595
ENSDARG00000001129	ENSDART00000045881	17	26	26	GACTGCGCAGGGCTCGGCGGGCGGC	7	-	5548	5595
ENSDARG00000001214	ENSDART00000001380	17	1	1	AGCTTCATCCTTTCTGTCGGAGAA	6	-	124	1590
ENSDARG00000001214	ENSDART00000001380	17	1	1	AACATCTTCAACATTAGCAGTCTTG	7	-	33	1590
ENSDARG00000001214	ENSDART00000001380	17	3	3	AGCTCACCAGCCTTTCTGTTTGC	5	-	420	1590
ENSDARG00000001214	ENSDART00000001380	17	3	3	CTCACCAGCCTTTCTGTTTGCTTGT	7	-	416	1590
ENSDARG00000001214	ENSDART00000001380	17	4	4	GAAATCTGCTTCCCTGTCTGAAGCG	7	-	550	1590
ENSDARG00000001214	ENSDART00000001380	17	4	4	ATCTGCTTCCCTGTCTGAAGCGGGC	7	-	547	1590
ENSDARG00000001214	ENSDART00000001380	17	6	6	CTCTGCCACCAGACCCGCAGTGGAC	7	-	954	1590
ENSDARG00000001214	ENSDART00000001380	17	7	7	CTCACCAGCAGTGTGTTGTCTGT	5	-	1030	1590
ENSDARG00000001214	ENSDART00000001380	17	7	7	CTCTCCAACAGGCAGAGGAAGCC	5	-	1099	1590
ENSDARG00000001214	ENSDART00000001380	17	7	7	AGCTCACCAGCAGTGTGTTGTCTGT	7	-	1030	1590
ENSDARG00000001214	ENSDART00000001380	17	7	7	AGCTCACCAGCAGTGTGTTGTCT	5	-	1032	1590
ENSDARG00000001214	ENSDART00000001380	17	8	8	GAACACAGCGCTGCTGGAATGGGTG	7	-	1141	1590
ENSDARG00000001214	ENSDART00000001380	17	8	8	TCCTGCTTCAGACGGGCATGAGAG	6	-	1176	1590
ENSDARG00000001214	ENSDART00000001380	17	8	8	TGCCACACACAGTCAAGCAGCAGCA	7	-	1214	1590
ENSDARG00000001214	ENSDART00000001380	17	9	9	GTCCACAGCTGTAAGGACTGAGGA	6	-	1488	1590
ENSDARG00000001214	ENSDART00000082305	17	1	1	AGCTTCATCCTTTCTGTCGGAGAA	6	-	124	1713
ENSDARG00000001214	ENSDART00000082305	17	1	1	AACATCTTCAACATTAGCAGTCTTG	7	-	33	1713
ENSDARG00000001214	ENSDART00000082305	17	4	4	AGCTCACCAGCCTTTCTGTTTGC	5	-	447	1713
ENSDARG00000001214	ENSDART00000082305	17	4	4	CTCACCAGCCTTTCTGTTTGCTTGT	7	-	443	1713
ENSDARG00000001214	ENSDART00000082305	17	5	5	GAAATCTGCTTCCCTGTCTGAAGCG	7	-	577	1713
ENSDARG00000001214	ENSDART00000082305	17	5	5	ATCTGCTTCCCTGTCTGAAGCGGGC	7	-	574	1713
ENSDARG00000001214	ENSDART00000082305	17	7	7	CTCTGCCACCAGACCCGCAGTGGAC	7	-	981	1713
ENSDARG00000001214	ENSDART00000082305	17	8	8	AGCTCACCAGCAGTGTGTTGTCT	5	-	1059	1713
ENSDARG00000001214	ENSDART00000082305	17	8	8	CTCTCCAACAGGCAGAGGAAGCC	5	-	1126	1713
ENSDARG00000001214	ENSDART00000082305	17	8	8	CTCACCAGCAGTGTGTTGTCTGT	5	-	1057	1713
ENSDARG00000001214	ENSDART00000082305	17	8	8	AGCTCACCAGCAGTGTGTTGTCTGT	7	-	1057	1713
ENSDARG00000001214	ENSDART00000082305	17	9	9	GAACACAGCGCTGCTGGAATGGGTG	7	-	1168	1713
ENSDARG00000001214	ENSDART00000082305	17	9	9	TCCTGCTTCAGACGGGCATGAGAG	6	-	1203	1713
ENSDARG00000001214	ENSDART00000082305	17	9	9	TGCCACACACAGTCAAGCAGCAGCA	7	-	1241	1713
ENSDARG00000001214	ENSDART00000082305	17	10	10	GTCCACAGCTGTAAGGACTGAGGA	6	-	1515	1713
ENSDARG00000001214	ENSDART00000082311	17	1	1	AGCTTCATCCTTTCTGTCGGAGAA	6	-	112	1356
ENSDARG00000001214	ENSDART00000082311	17	1	1	AACATCTTCAACATTAGCAGTCTTG	7	-	21	1356
ENSDARG00000001214	ENSDART00000082311	17	7	7	ATCTGCTTCCCTGTCTGAAGCGGGC	7	-	535	1356
ENSDARG00000001214	ENSDART00000082311	17	7	7	GAAATCTGCTTCCCTGTCTGAAGCG	7	-	538	1356
ENSDARG00000001214	ENSDART00000082311	17	9	9	CTCTGCCACCAGACCCGCAGTGGAC	7	-	942	1356
ENSDARG00000001214	ENSDART00000082311	17	10	10	AGCTCACCAGCAGTGTGTTGTCTGT	7	-	1015	1356
ENSDARG00000001214	ENSDART00000082311	17	10	10	CTCACCAGCAGTGTGTTGTCTGT	5	-	1015	1356
ENSDARG00000001214	ENSDART00000082311	17	10	10	CTCTCCAACAGGCAGAGGAAGCC	5	-	1084	1356
ENSDARG00000001214	ENSDART00000082311	17	10	10	AGCTCACCAGCAGTGTGTTGTCT	5	-	1017	1356
ENSDARG00000001214	ENSDART00000082311	17	11	11	TGCCACACACAGTCAAGCAGCAGCA	7	-	1199	1356
ENSDARG00000001214	ENSDART00000082311	17	11	11	TCCTGCTTCAGACGGGCATGAGAG	6	-	1161	1356
ENSDARG00000001214	ENSDART00000082311	17	11	11	GAACACAGCGCTGCTGGAATGGGTG	7	-	1126	1356
ENSDARG00000001244	ENSDART00000001415	17	4	4	TGCATCATCTTTCCATCTGGATTC	6	-	243	2688
ENSDARG00000001244	ENSDART00000001415	17	5	5	AAAACCAACCGTTTAGGGCTTTTTG	7	-	494	2688
ENSDARG00000001244	ENSDART00000001415	17	5	5	AAACCAACCGTTTAGGGCTTTTTG	6	-	494	2688
ENSDARG00000001244	ENSDART00000001415	17	7	7	TCCTTCTCCCTGTCCCTGGGTTTAG	7	-	794	2688
ENSDARG00000001244	ENSDART00000001415	17	8	8	AGATTCGCCTCCTGGGACTTGTTC	6	-	917	2688
ENSDARG00000001244	ENSDART00000001415	17	9	9	GGCCTCGTCTTCTTGGGGGGCTGGA	7	-	1132	2688
ENSDARG00000001244	ENSDART00000001415	17	9	9	CTCGTCTTCTTGGGGGGCTGGAGAG	7	-	1129	2688
ENSDARG00000001244	ENSDART00000001415	17	9	9	TGCGGCCTCGTCTTCTTGGGGGGCT	7	-	1135	2688
ENSDARG00000001244	ENSDART00000001415	17	9	9	GACTGCGGCCTCGTCTTCTTGGGGG	7	-	1138	2688
ENSDARG00000001244	ENSDART00000001415	17	12	12	TTCATCTTCAGATGAAGAGGATGAA	7	-	1365	2688
ENSDARG00000001244	ENSDART00000001415	17	12	12	GCCGCCTCCGTGGTGAGGCAGGT	5	-	1458	2688
ENSDARG00000001244	ENSDART00000001415	17	12	12	TGCCGCCTCCGTGGTGAGGCAGGT	6	-	1458	2688
ENSDARG00000001244	ENSDART00000001415	17	12	12	ACCTTCATCTTCAGATGAAGAGGAT	7	-	1368	2688
ENSDARG00000001244	ENSDART00000001415	17	13	13	ACCTGCGTCTTGGGGGAGGAGAG	5	-	1572	2688
ENSDARG00000001244	ENSDART00000001415	17	13	13	GTCTACGTCCAGGAGGTGACGGA	5	-	1512	2688
ENSDARG00000001244	ENSDART00000001415	17	13	13	TGCGGCGGCGAACAGGAGATTGT	5	-	1542	2688
ENSDARG00000001244	ENSDART00000001415	17	14	14	GTATTCTACGCTTGGGCATGGGTG	6	-	1718	2688
ENSDARG00000001244	ENSDART00000001415	17	14	14	ACATTCTGCGTTTGGGGGGAGGT	5	-	1749	2688
ENSDARG00000001244	ENSDART00000001415	17	14	14	ACATACCTCTGCGATTTGCGCGGTT	7	-	2318	2688
ENSDARG00000001244	ENSDART00000001415	17	14	14	AACTTCTACGTTGCGGGGCAGGT	5	-	1956	2688
ENSDARG00000001244	ENSDART00000001415	17	14	14	ACCTTCTTCGTTTGGGGGGAGAC	5	-	1689	2688
ENSDARG00000001244	ENSDART00000001415	17	14	14	AAACCCTGCGAATGGGTCTGGTGCT	7	-	2281	2688
ENSDARG00000001244	ENSDART00000001415	17	14	14	TTAGCCACAGGGGAAGGCGATGTT	6	-	1854	2688
ENSDARG00000001244	ENSDART00000001415	17	14	14	AAACCCTGCGAATGGGTCTGGTGC	6	-	2282	2688
ENSDARG00000001244	ENSDART00000001415	17	14	14	CTCTGCCCCGTTGGGCTGCAGGG	5	-	2142	2688
ENSDARG00000001244	ENSDART00000001415	17	14	14	ACATTCTGCGTTTGGGGGGAGGTG	6	-	1748	2688
ENSDARG00000001244	ENSDART00000001415	17	15	15	AGACACTGCTGTTCTTTTTGGCT	5	-	2466	2688
ENSDARG00000001244	ENSDART00000001415	17	15	15	GAAACCTGCCTCCTTTCTGGCGGA	6	-	2352	2688
ENSDARG00000001244	ENSDART00000001415	17	15	15	ACCTGCCTCCTTTCTGGCGGAGGA	6	-	2349	2688
ENSDARG00000001244	ENSDART00000001415	17	15	15	ACCTGCCTCCTTTCTGGCGGAGGAC	7	-	2348	2688
ENSDARG00000001244	ENSDART00000001415	17	15	15	GGCCGCTTCTGAGCCGGAGGAGGAG	7	-	2393	2688
ENSDARG00000001244	ENSDART00000001415	17	15	15	GGCCGCTTCTGAGCCGGAGGAGGA	6	-	2394	2688
ENSDARG00000001244	ENSDART00000001415	17	15	15	GCAGGCCGCTTCTGAGCCGGAGGA	6	-	2397	2688
ENSDARG00000001313	ENSDART00000001444	17	4	4	GGCTGCTCCATCAAAAGCTGTCGGC	7	+	301	2118
ENSDARG00000001313	ENSDART00000001444	17	5	5	CCCCACTCCTGCTCCATCTGTCTAG	7	+	445	2118
ENSDARG00000001313	ENSDART00000001444	17	7	7	GTCTACCACCGCTGTGATGCAGTG	6	+	709	2118
ENSDARG00000001313	ENSDART00000001444	17	10	10	GTTCACAGAGGTGCTGGTGGGAG	5	+	1077	2118
ENSDARG00000001313	ENSDART00000001444	17	10	10	GTTCACAGAGGTGCTGGTGGGAGAT	7	+	1077	2118
ENSDARG00000001313	ENSDART00000001444	17	12	12	AGCTTCCTCTGCAAAGGTTTGTAA	6	+	1655	2118
ENSDARG00000001313	ENSDART00000001444	17	12	12	AGCATCACAATATTTGGAAGCTGCA	7	+	1545	2118
ENSDARG00000001313	ENSDART00000001444	17	12	12	AGCAAAGTCAATGAAGGAGCTGAG	6	+	1506	2118
ENSDARG00000001313	ENSDART00000001444	17	12	12	AGAAGCAAAGTCAATGAAGGAGCT	6	+	1503	2118
ENSDARG00000001313	ENSDART00000001444	17	13	13	TTCCTCAGATTCCGTGAAGGTTTG	6	+	1663	2118
ENSDARG00000001313	ENSDART00000001444	17	13	13	AAAGACCACGATAAGCTTTTGGA	5	+	1836	2118
ENSDARG00000001313	ENSDART00000001444	17	13	13	AGAAAAGACCACGATAAGCTTTT	5	+	1833	2118
ENSDARG00000001313	ENSDART00000001444	17	14	14	TTCCTCAGAGCAACTGTGATGCC	5	+	2012	2118
ENSDARG00000001313	ENSDART00000001444	17	14	14	CTCACCAGACAACTTGTGTGCTTTT	7	+	1989	2118
ENSDARG00000001463	ENSDART00000001691	17	4	4	AGCTCCCTCAGGTTTTTGTAGTC	5	-	247	1032
ENSDARG00000001463	ENSDART00000001691	17	4	4	ACCAGCTCCCTCAGGTTTTTGTA	5	-	250	1032
ENSDARG00000001463	ENSDART00000001691	17	5	5	CCCATCAGCTCTGCGTGGACTTT	5	-	517	1032
ENSDARG00000001463	ENSDART00000001691	17	5	5	TCCCCCATCAGCTCTGCGTGGAC	5	-	520	1032
ENSDARG00000001463	ENSDART00000001691	17	7	7	AGCCACTTCTTCAGGTGTGAAGCT	6	-	811	1032
ENSDARG00000001463	ENSDART00000001691	17	7	7	AAAGACAGCTTTCAGGAGCCTGC	5	-	759	1032
ENSDARG00000001463	ENSDART00000001691	17	8	8	CAAACCGCACTGGCCAGCTGTCTGC	7	-	904	1032
ENSDARG00000001729	ENSDART00000030131	17	1	1	GGCCCATTCGTGCTGGATGTAGTG	6	-	97	2034
ENSDARG00000001729	ENSDART00000030131	17	5	5	TTCGCCTCCATTTAGAATTTGTT	5	-	551	2034
ENSDARG00000001729	ENSDART00000030131	17	5	5	AGATTCGCCTCCATTTAGAATTT	5	-	554	2034
ENSDARG00000001729	ENSDART00000030131	17	7	7	AGCACCTTCTCCATCCTCTGCATTC	7	-	828	2034
ENSDARG00000001729	ENSDART00000030131	17	7	7	CAAAAAGTCAAACTCTTTGAGTGC	6	-	802	2034
ENSDARG00000001729	ENSDART00000030131	17	13	13	AGCATCTCCAGTGTTGTAAGACGCC	7	-	1596	2034
ENSDARG00000001729	ENSDART00000030131	17	13	13	AACAACAGCATCTCCAGTGTTGTAA	7	-	1602	2034
ENSDARG00000001729	ENSDART00000030131	17	13	13	GTACCACTCTCTCCCTGTGCAGAG	6	-	1662	2034
ENSDARG00000001729	ENSDART00000030131	17	15	15	GCCACCATCGCATGGATGGCTTT	5	-	1792	2034
ENSDARG00000001898	ENSDART00000040605	17	2	1	ATCATCAGCACGGGTTTGGGGGA	5	-	178	1314
ENSDARG00000001898	ENSDART00000040605	17	3	2	TACAACACCTTCAACTGATTTTTGT	7	-	596	1314
ENSDARG00000001898	ENSDART00000040605	17	5	4	CACCAAGTCATTATAGTCGCAGAA	6	-	988	1314
ENSDARG00000001898	ENSDART00000040605	17	5	4	TTCTTCCACAAGAAGGGCGATGAA	6	-	853	1314
ENSDARG00000002021	ENSDART00000022830	17	2	2	TTCATCACAGGTATTCTGTAGCC	5	-	320	2529
ENSDARG00000002021	ENSDART00000022830	17	8	8	GCAGCCAAACTTTGAGGATTTGAA	6	-	943	2529
ENSDARG00000002021	ENSDART00000022830	17	8	8	CCCTGCAGCCAAACTTTGAGGAT	5	-	948	2529
ENSDARG00000002021	ENSDART00000022830	17	10	10	GTATGCACATGTTTTGGTGGTGAT	6	-	1111	2529
ENSDARG00000002021	ENSDART00000022830	17	10	10	GCCTCAGGCAGCACAGTGTGGTTT	6	-	1137	2529
ENSDARG00000002021	ENSDART00000022830	17	10	10	GCCTCAGGCAGCACAGTGTGGTTTG	7	-	1136	2529
ENSDARG00000002021	ENSDART00000022830	17	11	11	TGCCACACCATTGACAGCGTGAGAA	7	-	1356	2529
ENSDARG00000002021	ENSDART00000022830	17	12	12	GCAGCCATCGGCGAGGTGTGATAC	6	-	1466	2529
ENSDARG00000002021	ENSDART00000022830	17	16	16	CTCCAACCACCGGATCGTGGTTGAC	7	-	1900	2529
ENSDARG00000002021	ENSDART00000022830	17	16	16	TCCAACCACCGGATCGTGGTTGAC	6	-	1900	2529
ENSDARG00000002021	ENSDART00000022830	17	16	16	CTCTGCTAAAGAGACTCTGTAGTT	6	-	1951	2529
ENSDARG00000002021	ENSDART00000022830	17	17	17	TGCTCAGACAGGTCAGCGGCGGGA	6	-	1983	2529
ENSDARG00000002021	ENSDART00000022830	17	17	17	AGCGCCGTCCATCGTGCCGATGGT	6	-	2074	2529
ENSDARG00000002021	ENSDART00000104692	17	2	2	TTCATCACAGGTATTCTGTAGCC	5	-	320	1143
ENSDARG00000002021	ENSDART00000104692	17	8	8	GCAGCCAAACTTTGAGGATTTGAA	6	-	943	1143
ENSDARG00000002021	ENSDART00000104692	17	8	8	CCCTGCAGCCAAACTTTGAGGAT	5	-	948	1143
ENSDARG00000002026	ENSDART00000018737	17	2	2	TCCACCAGACCGTTGACTGAGTC	5	-	187	1149
ENSDARG00000002026	ENSDART00000018737	17	4	4	ACATGCAAATCTTCATTTAGGTGCT	7	-	446	1149
ENSDARG00000002026	ENSDART00000018737	17	6	6	TGCCAAGGCATAAGGGTAGTCGTA	6	-	877	1149
ENSDARG00000002353	ENSDART00000025689	17	6	5	GAACACCCCCTCAGTGTGCAAAC	5	-	356	1863
ENSDARG00000002353	ENSDART00000025689	17	6	5	TGCAAACCCTTTCTCTGCAGCAGAA	7	-	338	1863
ENSDARG00000002353	ENSDART00000025689	17	8	7	TCCATCTTCTCTATGTTGCTGTC	5	-	745	1863
ENSDARG00000002353	ENSDART00000025689	17	9	8	CACCAAAAATCCGACTGCAGTTGTC	7	-	799	1863
ENSDARG00000002353	ENSDART00000025689	17	10	9	GTCCACTTCCGTCTGGCTGCTGGA	6	-	1093	1863
ENSDARG00000002353	ENSDART00000025689	17	10	9	GTACGCAGAGTCGTGATGGTGCG	5	-	893	1863
ENSDARG00000002353	ENSDART00000025689	17	10	9	GCCTCAGCATTGTCTCTGTTGTG	5	-	1756	1863
ENSDARG00000002353	ENSDART00000025689	17	10	9	TGCCTCAGCATTGTCTCTGTTGTG	6	-	1756	1863
ENSDARG00000002353	ENSDART00000025689	17	10	9	AGCCGCTGCACGTTTGCTTTGAC	5	-	1680	1863
ENSDARG00000002353	ENSDART00000025689	17	10	9	AGATGCTGCTGAACCGTCTGGGTG	6	-	1068	1863
ENSDARG00000002353	ENSDART00000025689	17	10	9	ACAGTCATCGGAGATCTGCTTTT	5	-	1136	1863
ENSDARG00000002353	ENSDART00000025689	17	10	9	AACGTCTGCGGATCAGGAGTTGGGT	7	-	1024	1863
ENSDARG00000002353	ENSDART00000025689	17	10	9	AACGTCTGCGGATCAGGAGTTGGG	6	-	1025	1863
ENSDARG00000002353	ENSDART00000025689	17	10	9	AACAACTGCCCTTGTAGGTGTCTGC	7	-	934	1863
ENSDARG00000002353	ENSDART00000025689	17	10	9	AAAGTCCACTTCCGTCTGGCTGC	5	-	1097	1863
ENSDARG00000002353	ENSDART00000058809	17	2	2	TGCAAACCCTTTCTCTGCAGCAGAA	7	-	95	1539
ENSDARG00000002353	ENSDART00000058809	17	2	2	GAACACCCCCTCAGTGTGCAAAC	5	-	113	1539
ENSDARG00000002353	ENSDART00000058809	17	4	4	TCCATCTTCTCTATGTTGCTGTC	5	-	502	1539
ENSDARG00000002353	ENSDART00000058809	17	5	5	CACCAAAAATCCGACTGCAGTTGTC	7	-	556	1539
ENSDARG00000002353	ENSDART00000058809	17	7	7	AACGTCTGCGGATCAGGAGTTGGGT	7	-	811	1539
ENSDARG00000002353	ENSDART00000058809	17	7	7	AAAGTCCACTTCCGTCTGGCTGC	5	-	884	1539
ENSDARG00000002353	ENSDART00000058809	17	7	7	AACGTCTGCGGATCAGGAGTTGGG	6	-	812	1539
ENSDARG00000002353	ENSDART00000058809	17	7	7	GTCCACTTCCGTCTGGCTGCTGGA	6	-	880	1539
ENSDARG00000002353	ENSDART00000058809	17	7	7	GTACGCAGAGTCGTGATGGTGCG	5	-	680	1539
ENSDARG00000002353	ENSDART00000058809	17	7	7	AACAACTGCCCTTGTAGGTGTCTGC	7	-	721	1539
ENSDARG00000002353	ENSDART00000058809	17	7	7	AGCCGCTGCACGTTTGCTTTGAC	5	-	1467	1539
ENSDARG00000002353	ENSDART00000058809	17	7	7	AGATGCTGCTGAACCGTCTGGGTG	6	-	855	1539
ENSDARG00000002353	ENSDART00000058809	17	7	7	ACAGTCATCGGAGATCTGCTTTT	5	-	923	1539
ENSDARG00000002353	ENSDART00000058809	17	8	8	GCCTCAGCATTGTCTCTGTTGTG	5	-	1516	1539
ENSDARG00000002353	ENSDART00000058809	17	8	8	TGCCTCAGCATTGTCTCTGTTGTG	6	-	1516	1539
ENSDARG00000002401	ENSDART00000005727	17	2	1	GGCAGCCACTGTGTTGTGGAGCT	5	+	52	1050
ENSDARG00000002401	ENSDART00000005727	17	2	1	TACATCGGCAGCCACTGTGTTGTG	6	+	46	1050
ENSDARG00000002401	ENSDART00000005727	17	2	1	ATCGGCAGCCACTGTGTTGTGGAG	6	+	49	1050
ENSDARG00000002401	ENSDART00000005727	17	5	4	AGCAGCATCCAGTAGGCGGCTGCA	6	+	446	1050
ENSDARG00000002401	ENSDART00000005727	17	5	4	AGCAGCATCCAGTAGGCGGCTGC	5	+	446	1050
ENSDARG00000002401	ENSDART00000005727	17	7	6	GAAAACATCTGAATGTGTTTGGA	5	+	668	1050
ENSDARG00000002401	ENSDART00000005727	17	7	6	GAAAACATCTGAATGTGTTTGGAA	6	+	668	1050
ENSDARG00000002401	ENSDART00000005727	17	8	7	GCAAAAGGCCACATTGCTGCAGTC	6	+	751	1050
ENSDARG00000002401	ENSDART00000005727	17	10	9	GAATTCGACCTGGAGAGGATGTG	5	+	976	1050
ENSDARG00000002401	ENSDART00000005727	17	10	9	GCCCCACGCCGGAGCGGTGATGTG	6	+	898	1050
ENSDARG00000002401	ENSDART00000005727	17	10	9	CTATGCAGATGCTAGTCTGGCGGA	6	+	930	1050
ENSDARG00000002401	ENSDART00000005727	17	10	9	CCCCACGCCGGAGCGGTGATGTG	5	+	899	1050
ENSDARG00000002502	ENSDART00000013761	17	1	1	AGATTCAAAAGAAATGCGGGCTGT	6	+	9	1035
ENSDARG00000002502	ENSDART00000013761	17	1	1	TTCAAAAGAAATGCGGGCTGTGGTT	7	+	12	1035
ENSDARG00000002502	ENSDART00000013761	17	2	2	AACACCAAAGGCTTCGAGGTATGT	6	+	244	1035
ENSDARG00000002502	ENSDART00000013761	17	3	3	GTAAACTACAATGCCTGGGCAGAG	6	+	286	1035
ENSDARG00000002502	ENSDART00000013761	17	3	3	GCACTCAGCAGGAGGTGGGGTGGTA	7	+	456	1035
ENSDARG00000002502	ENSDART00000013761	17	3	3	GCACTCAGCAGGAGGTGGGGTGGT	6	+	456	1035
ENSDARG00000002502	ENSDART00000013761	17	3	3	CTACAATGCCTGGGCAGAGGTCGTA	7	+	291	1035
ENSDARG00000002502	ENSDART00000013761	17	3	3	CACTCAGCAGGAGGTGGGGTGGTAA	7	+	457	1035
ENSDARG00000002502	ENSDART00000013761	17	3	3	CACTCAGCAGGAGGTGGGGTGGTA	6	+	457	1035
ENSDARG00000002502	ENSDART00000013761	17	3	3	CACTCAGCAGGAGGTGGGGTGGT	5	+	457	1035
ENSDARG00000002502	ENSDART00000013761	17	3	3	ACATTCCCAGAGGCGGCTGCCTTC	6	+	358	1035
ENSDARG00000002502	ENSDART00000013761	17	5	5	ACATACATCCTGTATGGTTAGTAG	6	+	709	1035
ENSDARG00000002559	ENSDART00000002997	17	2	2	TCCAGCAGCCGGTGGTGGTGGTG	5	+	113	1671
ENSDARG00000002559	ENSDART00000002997	17	2	2	TCCAGCAGCCGGTGGTGGTGGTGGC	7	+	113	1671
ENSDARG00000002559	ENSDART00000002997	17	2	2	AGACACCGCCAGCGATGGGAAGCT	6	+	51	1671
ENSDARG00000002559	ENSDART00000002997	17	2	2	ACCGCCAGCGATGGGAAGCTGTG	5	+	55	1671
ENSDARG00000002559	ENSDART00000002997	17	2	2	TCCTCCAGCAGATCCAGCAGCCGGT	7	+	101	1671
ENSDARG00000002559	ENSDART00000002997	17	2	2	GACACCGCCAGCGATGGGAAGCT	5	+	52	1671
ENSDARG00000002559	ENSDART00000002997	17	3	3	AGAGACCACCCTGCTGCTGCTGGA	6	+	279	1671
ENSDARG00000002559	ENSDART00000002997	17	4	4	AACATCTTCAGTCTGGCGGTTCT	5	+	352	1671
ENSDARG00000002559	ENSDART00000002997	17	4	4	AGCAACATCTTCAGTCTGGCGGT	5	+	349	1671
ENSDARG00000002559	ENSDART00000002997	17	5	5	GTCAAATCCCCAAACGAAGATGTG	6	+	472	1671
ENSDARG00000002559	ENSDART00000002997	17	5	5	CAAATCCCCAAACGAAGATGTGGAT	7	+	474	1671
ENSDARG00000002559	ENSDART00000002997	17	5	5	ATCCCCAAACGAAGATGTGGATAAC	7	+	477	1671
ENSDARG00000002559	ENSDART00000002997	17	5	5	ATCCCCAAACGAAGATGTGGATAA	6	+	477	1671
ENSDARG00000002559	ENSDART00000002997	17	5	5	AGCTTCATCTGGGCGGTGCGGGA	5	+	529	1671
ENSDARG00000002559	ENSDART00000002997	17	5	5	AAATCCCCAAACGAAGATGTGGAT	6	+	475	1671
ENSDARG00000002559	ENSDART00000002997	17	5	5	TCCCCAAACGAAGATGTGGATAA	5	+	478	1671
ENSDARG00000002559	ENSDART00000002997	17	5	5	TCCCCAAACGAAGATGTGGATAAC	6	+	478	1671
ENSDARG00000002559	ENSDART00000002997	17	6	6	TCCAACCACGCTGGAGAAGATGTC	6	+	720	1671
ENSDARG00000002559	ENSDART00000002997	17	6	6	TTCCAACCACGCTGGAGAAGATGTC	7	+	719	1671
ENSDARG00000002559	ENSDART00000002997	17	6	6	CACTTCAAAAAAAGTGATGGAGTT	6	+	633	1671
ENSDARG00000002559	ENSDART00000002997	17	7	7	ATCTCCAGCGGGGCGGTGCCGTG	5	+	910	1671
ENSDARG00000002559	ENSDART00000002997	17	7	7	AGAGCCTTCCCTCTGGAGCTGGA	5	+	1030	1671
ENSDARG00000002559	ENSDART00000002997	17	7	7	AACACCATCTCCAGCGGGGCGGTG	6	+	904	1671
ENSDARG00000002559	ENSDART00000002997	17	7	7	ACCATCTCCAGCGGGGCGGTGCC	5	+	907	1671
ENSDARG00000002559	ENSDART00000002997	17	8	8	TTCTACGCCAAACCTGGAGGCTAC	6	+	1276	1671
ENSDARG00000002559	ENSDART00000002997	17	10	10	AGACGCAGAGACAGCTGAAGGAGAG	7	+	1532	1671
ENSDARG00000002559	ENSDART00000002997	17	10	10	TGCAGCAGATGAAGCTGAAGATGGA	7	+	1592	1671
ENSDARG00000002559	ENSDART00000002997	17	10	10	AGAGACAGCTGAAGGAGAGGATGGA	7	+	1538	1671
ENSDARG00000002559	ENSDART00000002997	17	10	10	AGCAGCAGCGGGTGGAGGCGCAGCG	7	+	1628	1671
ENSDARG00000002635	ENSDART00000005313	17	1	1	ACACCCACCTTAGTGAGTTGTGC	5	-	55	2874
ENSDARG00000002635	ENSDART00000005313	17	1	1	GACACCCACCTTAGTGAGTTGTGC	6	-	55	2874
ENSDARG00000002635	ENSDART00000005313	17	2	2	GTCCTCTTCCAGGCCAGCAGGTTTT	7	-	734	2874
ENSDARG00000002635	ENSDART00000005313	17	2	2	CTCATCCCCGATCTTGCTTTTGTA	6	-	190	2874
ENSDARG00000002635	ENSDART00000005313	17	2	2	CTCTTCAAATTCGTGTCGCATTT	5	-	389	2874
ENSDARG00000002635	ENSDART00000005313	17	2	2	GGCGTCTTCGTGCTCGTCGTTTTT	6	-	91	2874
ENSDARG00000002635	ENSDART00000005313	17	2	2	GCCTGCAGCCGGTTGGTCTTGTCT	6	-	870	2874
ENSDARG00000002635	ENSDART00000005313	17	2	2	GACTCCAGCTCTGTGCGGTGAAGTT	7	-	572	2874
ENSDARG00000002635	ENSDART00000005313	17	2	2	GTTTACACAGAGTCCTCTGCAGTG	6	-	800	2874
ENSDARG00000002635	ENSDART00000005313	17	2	2	TGCTGCACCTCCTCGTCGTGGGC	5	-	133	2874
ENSDARG00000002635	ENSDART00000005313	17	2	2	TTCTCCTGCTCCAGGCTGGAGGA	5	-	541	2874
ENSDARG00000002635	ENSDART00000005313	17	2	2	AGACCACGCGTTGGGTGTGCTGGG	6	-	344	2874
ENSDARG00000002635	ENSDART00000005313	17	2	2	TTCAACTTCTTGCCGATGGGCTGAT	7	-	483	2874
ENSDARG00000002635	ENSDART00000005313	17	2	2	GCCTCCTCCTGAGCTCTGTGCAGTT	7	-	833	2874
ENSDARG00000002635	ENSDART00000005313	17	2	2	AGAGACTCCAGCTCTGTGCGGTG	5	-	577	2874
ENSDARG00000002635	ENSDART00000005313	17	2	2	AGAGACTCCAGCTCTGTGCGGTGAA	7	-	575	2874
ENSDARG00000002635	ENSDART00000005313	17	4	4	AGCGTCTGCATCTGTTTCTGCAGCC	7	-	1178	2874
ENSDARG00000002635	ENSDART00000005313	17	4	4	GTCTGCATCTGTTTCTGCAGCCTCT	7	-	1175	2874
ENSDARG00000002635	ENSDART00000005313	17	6	6	CCCTCACTCTGGCCCTGGTGACGTC	7	-	1501	2874
ENSDARG00000002635	ENSDART00000005313	17	6	6	AGAAGCTTCTCTTGGCTGTCTTT	5	-	1468	2874
ENSDARG00000002635	ENSDART00000005313	17	8	8	ATCATCTCCAGATCTCTCTGCTGGG	7	-	1754	2874
ENSDARG00000002635	ENSDART00000005313	17	9	9	TGCCACCTCCTGCAGCTGCTGTG	5	-	1928	2874
ENSDARG00000002635	ENSDART00000005313	17	9	9	AACTGCGCCTGTAGCTGCTGCAGCG	7	-	1880	2874
ENSDARG00000002635	ENSDART00000005313	17	9	9	CTCTTCGACTGCGACATCTGCAGCT	7	-	1853	2874
ENSDARG00000002635	ENSDART00000005313	17	10	10	GACTCACCCAGCATGGCTTTGCC	5	-	2179	2874
ENSDARG00000002635	ENSDART00000005313	17	11	11	AGACTCACATGTTCTTTGCAGCG	5	-	2308	2874
ENSDARG00000002635	ENSDART00000005313	17	11	11	TTCTCCTTCAAGTGGACTTGTCT	5	-	2248	2874
ENSDARG00000002635	ENSDART00000005313	17	12	12	AGCTCCAGCTCCTTGGTTAGTGTGC	7	-	2432	2874
ENSDARG00000002635	ENSDART00000005313	17	12	12	AGCTCCAGCTCCTTGGTTAGTGT	5	-	2434	2874
ENSDARG00000002635	ENSDART00000005313	17	15	15	GACCCCGACATTGGGATTGGTGT	5	-	2837	2874
ENSDARG00000002635	ENSDART00000039279	17	1	1	GACACCCACCTTAGTGAGTTGTGC	6	-	55	3030
ENSDARG00000002635	ENSDART00000039279	17	1	1	ACACCCACCTTAGTGAGTTGTGC	5	-	55	3030
ENSDARG00000002635	ENSDART00000039279	17	2	2	TTCAACTTCTTGCCGATGGGCTGAT	7	-	483	3030
ENSDARG00000002635	ENSDART00000039279	17	2	2	TTCTCCTGCTCCAGGCTGGAGGA	5	-	541	3030
ENSDARG00000002635	ENSDART00000039279	17	2	2	GACTCCAGCTCTGTGCGGTGAAGTT	7	-	572	3030
ENSDARG00000002635	ENSDART00000039279	17	2	2	GCCTCCTCCTGAGCTCTGTGCAGTT	7	-	833	3030
ENSDARG00000002635	ENSDART00000039279	17	2	2	GCCTGCAGCCGGTTGGTCTTGTCT	6	-	870	3030
ENSDARG00000002635	ENSDART00000039279	17	2	2	GGCGTCTTCGTGCTCGTCGTTTTT	6	-	91	3030
ENSDARG00000002635	ENSDART00000039279	17	2	2	GTCCTCTTCCAGGCCAGCAGGTTTT	7	-	734	3030
ENSDARG00000002635	ENSDART00000039279	17	2	2	GTTTACACAGAGTCCTCTGCAGTG	6	-	800	3030
ENSDARG00000002635	ENSDART00000039279	17	2	2	TGCTGCACCTCCTCGTCGTGGGC	5	-	133	3030
ENSDARG00000002635	ENSDART00000039279	17	2	2	CTCTTCAAATTCGTGTCGCATTT	5	-	389	3030
ENSDARG00000002635	ENSDART00000039279	17	2	2	CTCATCCCCGATCTTGCTTTTGTA	6	-	190	3030
ENSDARG00000002635	ENSDART00000039279	17	2	2	AGACCACGCGTTGGGTGTGCTGGG	6	-	344	3030
ENSDARG00000002635	ENSDART00000039279	17	2	2	AGAGACTCCAGCTCTGTGCGGTG	5	-	577	3030
ENSDARG00000002635	ENSDART00000039279	17	2	2	AGAGACTCCAGCTCTGTGCGGTGAA	7	-	575	3030
ENSDARG00000002635	ENSDART00000039279	17	4	4	GTCTGCATCTGTTTCTGCAGCCTCT	7	-	1175	3030
ENSDARG00000002635	ENSDART00000039279	17	4	4	AGCGTCTGCATCTGTTTCTGCAGCC	7	-	1178	3030
ENSDARG00000002635	ENSDART00000039279	17	10	10	AGAAGCTTCTCTTGGCTGTCTTT	5	-	1624	3030
ENSDARG00000002635	ENSDART00000039279	17	10	10	CCCTCACTCTGGCCCTGGTGACGTC	7	-	1657	3030
ENSDARG00000002635	ENSDART00000039279	17	12	12	ATCATCTCCAGATCTCTCTGCTGGG	7	-	1910	3030
ENSDARG00000002635	ENSDART00000039279	17	13	13	CTCTTCGACTGCGACATCTGCAGCT	7	-	2009	3030
ENSDARG00000002635	ENSDART00000039279	17	13	13	AACTGCGCCTGTAGCTGCTGCAGCG	7	-	2036	3030
ENSDARG00000002635	ENSDART00000039279	17	13	13	TGCCACCTCCTGCAGCTGCTGTG	5	-	2084	3030
ENSDARG00000002635	ENSDART00000039279	17	14	14	GACTCACCCAGCATGGCTTTGCC	5	-	2335	3030
ENSDARG00000002635	ENSDART00000039279	17	15	15	TTCTCCTTCAAGTGGACTTGTCT	5	-	2404	3030
ENSDARG00000002635	ENSDART00000039279	17	15	15	AGACTCACATGTTCTTTGCAGCG	5	-	2464	3030
ENSDARG00000002635	ENSDART00000039279	17	16	16	AGCTCCAGCTCCTTGGTTAGTGT	5	-	2590	3030
ENSDARG00000002635	ENSDART00000039279	17	16	16	AGCTCCAGCTCCTTGGTTAGTGTGC	7	-	2588	3030
ENSDARG00000002635	ENSDART00000039279	17	19	19	GACCCCGACATTGGGATTGGTGT	5	-	2993	3030
ENSDARG00000002635	ENSDART00000105092	17	1	1	CTCTTCAAATTCGTGTCGCATTT	5	-	329	3102
ENSDARG00000002635	ENSDART00000105092	17	1	1	GACTCCAGCTCTGTGCGGTGAAGTT	7	-	512	3102
ENSDARG00000002635	ENSDART00000105092	17	1	1	GCCTCCTCCTGAGCTCTGTGCAGTT	7	-	773	3102
ENSDARG00000002635	ENSDART00000105092	17	1	1	GCCTGCAGCCGGTTGGTCTTGTCT	6	-	810	3102
ENSDARG00000002635	ENSDART00000105092	17	1	1	GGCGTCTTCGTGCTCGTCGTTTTT	6	-	31	3102
ENSDARG00000002635	ENSDART00000105092	17	1	1	GTCCTCTTCCAGGCCAGCAGGTTTT	7	-	674	3102
ENSDARG00000002635	ENSDART00000105092	17	1	1	GTTTACACAGAGTCCTCTGCAGTG	6	-	740	3102
ENSDARG00000002635	ENSDART00000105092	17	1	1	TGCTGCACCTCCTCGTCGTGGGC	5	-	73	3102
ENSDARG00000002635	ENSDART00000105092	17	1	1	TTCAACTTCTTGCCGATGGGCTGAT	7	-	423	3102
ENSDARG00000002635	ENSDART00000105092	17	1	1	TTCTCCTGCTCCAGGCTGGAGGA	5	-	481	3102
ENSDARG00000002635	ENSDART00000105092	17	1	1	CTCATCCCCGATCTTGCTTTTGTA	6	-	130	3102
ENSDARG00000002635	ENSDART00000105092	17	1	1	AGACCACGCGTTGGGTGTGCTGGG	6	-	284	3102
ENSDARG00000002635	ENSDART00000105092	17	1	1	AGAGACTCCAGCTCTGTGCGGTG	5	-	517	3102
ENSDARG00000002635	ENSDART00000105092	17	1	1	AGAGACTCCAGCTCTGTGCGGTGAA	7	-	515	3102
ENSDARG00000002635	ENSDART00000105092	17	3	3	GTCTGCATCTGTTTCTGCAGCCTCT	7	-	1115	3102
ENSDARG00000002635	ENSDART00000105092	17	3	3	AGCGTCTGCATCTGTTTCTGCAGCC	7	-	1118	3102
ENSDARG00000002635	ENSDART00000105092	17	10	10	AGAAGCTTCTCTTGGCTGTCTTT	5	-	1570	3102
ENSDARG00000002635	ENSDART00000105092	17	10	10	CCCTCACTCTGGCCCTGGTGACGTC	7	-	1603	3102
ENSDARG00000002635	ENSDART00000105092	17	12	12	ATCATCTCCAGATCTCTCTGCTGGG	7	-	1856	3102
ENSDARG00000002635	ENSDART00000105092	17	13	13	AACTGCGCCTGTAGCTGCTGCAGCG	7	-	1982	3102
ENSDARG00000002635	ENSDART00000105092	17	13	13	CTCTTCGACTGCGACATCTGCAGCT	7	-	1955	3102
ENSDARG00000002635	ENSDART00000105092	17	13	13	TGCCACCTCCTGCAGCTGCTGTG	5	-	2030	3102
ENSDARG00000002635	ENSDART00000105092	17	14	14	GACTCACCCAGCATGGCTTTGCC	5	-	2281	3102
ENSDARG00000002635	ENSDART00000105092	17	15	15	AGACTCACATGTTCTTTGCAGCG	5	-	2410	3102
ENSDARG00000002635	ENSDART00000105092	17	15	15	TTCTCCTTCAAGTGGACTTGTCT	5	-	2350	3102
ENSDARG00000002635	ENSDART00000105092	17	16	16	AGCTCCAGCTCCTTGGTTAGTGT	5	-	2536	3102
ENSDARG00000002635	ENSDART00000105092	17	16	16	AGCTCCAGCTCCTTGGTTAGTGTGC	7	-	2534	3102
ENSDARG00000002635	ENSDART00000105092	17	18	18	GACCCCGACATTGGGATTGGTGT	5	-	2792	3102
ENSDARG00000002635	ENSDART00000105092	17	19	19	CTCACCTCCGGGTGGAGTTGGCC	5	-	3015	3102
ENSDARG00000002635	ENSDART00000105092	17	19	19	TTCAGCCGCAACAATGCTTAGGCT	6	-	2875	3102
ENSDARG00000002635	ENSDART00000105093	17	1	1	GTTTACACAGAGTCCTCTGCAGTG	6	-	740	3249
ENSDARG00000002635	ENSDART00000105093	17	1	1	GTCCTCTTCCAGGCCAGCAGGTTTT	7	-	674	3249
ENSDARG00000002635	ENSDART00000105093	17	1	1	GGCGTCTTCGTGCTCGTCGTTTTT	6	-	31	3249
ENSDARG00000002635	ENSDART00000105093	17	1	1	CTCATCCCCGATCTTGCTTTTGTA	6	-	130	3249
ENSDARG00000002635	ENSDART00000105093	17	1	1	GCCTGCAGCCGGTTGGTCTTGTCT	6	-	810	3249
ENSDARG00000002635	ENSDART00000105093	17	1	1	GCCTCCTCCTGAGCTCTGTGCAGTT	7	-	773	3249
ENSDARG00000002635	ENSDART00000105093	17	1	1	TGCTGCACCTCCTCGTCGTGGGC	5	-	73	3249
ENSDARG00000002635	ENSDART00000105093	17	1	1	AGAGACTCCAGCTCTGTGCGGTGAA	7	-	515	3249
ENSDARG00000002635	ENSDART00000105093	17	1	1	AGAGACTCCAGCTCTGTGCGGTG	5	-	517	3249
ENSDARG00000002635	ENSDART00000105093	17	1	1	TTCAACTTCTTGCCGATGGGCTGAT	7	-	423	3249
ENSDARG00000002635	ENSDART00000105093	17	1	1	AGACCACGCGTTGGGTGTGCTGGG	6	-	284	3249
ENSDARG00000002635	ENSDART00000105093	17	1	1	CTCTTCAAATTCGTGTCGCATTT	5	-	329	3249
ENSDARG00000002635	ENSDART00000105093	17	1	1	TTCTCCTGCTCCAGGCTGGAGGA	5	-	481	3249
ENSDARG00000002635	ENSDART00000105093	17	1	1	GACTCCAGCTCTGTGCGGTGAAGTT	7	-	512	3249
ENSDARG00000002635	ENSDART00000105093	17	3	3	AGCGTCTGCATCTGTTTCTGCAGCC	7	-	1118	3249
ENSDARG00000002635	ENSDART00000105093	17	3	3	GTCTGCATCTGTTTCTGCAGCCTCT	7	-	1115	3249
ENSDARG00000002635	ENSDART00000105093	17	10	10	AGAAGCTTCTCTTGGCTGTCTTT	5	-	1570	3249
ENSDARG00000002635	ENSDART00000105093	17	10	10	CCCTCACTCTGGCCCTGGTGACGTC	7	-	1603	3249
ENSDARG00000002635	ENSDART00000105093	17	12	12	ATCATCTCCAGATCTCTCTGCTGGG	7	-	1856	3249
ENSDARG00000002635	ENSDART00000105093	17	13	13	AACTGCGCCTGTAGCTGCTGCAGCG	7	-	1982	3249
ENSDARG00000002635	ENSDART00000105093	17	13	13	CTCTTCGACTGCGACATCTGCAGCT	7	-	1955	3249
ENSDARG00000002635	ENSDART00000105093	17	13	13	TGCCACCTCCTGCAGCTGCTGTG	5	-	2030	3249
ENSDARG00000002635	ENSDART00000105093	17	14	14	GACTCACCCAGCATGGCTTTGCC	5	-	2281	3249
ENSDARG00000002635	ENSDART00000105093	17	15	15	TTCTCCTTCAAGTGGACTTGTCT	5	-	2350	3249
ENSDARG00000002635	ENSDART00000105093	17	15	15	AGACTCACATGTTCTTTGCAGCG	5	-	2410	3249
ENSDARG00000002635	ENSDART00000105093	17	16	16	AGCTCCAGCTCCTTGGTTAGTGTGC	7	-	2534	3249
ENSDARG00000002635	ENSDART00000105093	17	16	16	AGCTCCAGCTCCTTGGTTAGTGT	5	-	2536	3249
ENSDARG00000002635	ENSDART00000105093	17	19	19	GACCCCGACATTGGGATTGGTGT	5	-	2939	3249
ENSDARG00000002635	ENSDART00000105093	17	20	20	TTCAGCCGCAACAATGCTTAGGCT	6	-	3022	3249
ENSDARG00000002635	ENSDART00000105093	17	20	20	CTCACCTCCGGGTGGAGTTGGCC	5	-	3162	3249
ENSDARG00000002701	ENSDART00000018801	17	4	3	TTACTCTTCTGAAGAAGTCGTGGAC	7	+	186	765
ENSDARG00000002701	ENSDART00000018801	17	4	3	AGACACTTACTCTTCTGAAGAAGTC	7	+	180	765
ENSDARG00000002701	ENSDART00000018801	17	6	5	TTCGGCTGCCTTTTCTTTGAAGTC	6	+	484	765
ENSDARG00000002701	ENSDART00000018801	17	6	5	GGCGACTGCAAAGCTGGTGACTGT	6	+	681	765
ENSDARG00000002701	ENSDART00000018801	17	6	5	GCAAACGCAGAGCTCCGACGCTGAC	7	+	725	765
ENSDARG00000002701	ENSDART00000018801	17	6	5	CAAGTCTGCCATCAGCCTGAGCT	5	+	615	765
ENSDARG00000002701	ENSDART00000018801	17	6	5	ACCGGCGACTGCAAAGCTGGTGAC	6	+	678	765
ENSDARG00000002701	ENSDART00000018801	17	6	5	AAACGCAGAGCTCCGACGCTGAC	5	+	727	765
ENSDARG00000002776	ENSDART00000026904	17	3	3	TTCAGCTTCATCAAGCTGCAGAA	5	+	101	879
ENSDARG00000002776	ENSDART00000026904	17	3	3	AGCTTCATCAAGCTGCAGAAGTG	5	+	104	879
ENSDARG00000002776	ENSDART00000026904	17	4	4	TCCATCAGAAAAAAATAAGGCGAC	6	+	185	879
ENSDARG00000002776	ENSDART00000026904	17	5	5	GACAAATACAGCAGCAGCAGCAGCA	7	+	286	879
ENSDARG00000002776	ENSDART00000026904	17	5	5	CAATGCAAACAAGAGGCAGCGTCT	6	+	309	879
ENSDARG00000002776	ENSDART00000026904	17	5	5	GTTTCAGACAAATACAGCAGCAGCA	7	+	280	879
ENSDARG00000002776	ENSDART00000026904	17	9	9	TGCAGCTCCTCGGCTGAGGTGAAC	6	+	712	879
ENSDARG00000002776	ENSDART00000026904	17	9	9	TACTGCAGCTCCTCGGCTGAGGTG	6	+	709	879
ENSDARG00000002776	ENSDART00000026904	17	9	9	TACTGCAGCTCCTCGGCTGAGGT	5	+	709	879
ENSDARG00000002776	ENSDART00000026904	17	10	10	AGCCAAACAGAGGAAGAGGAAGAA	6	+	864	879
ENSDARG00000002776	ENSDART00000026904	17	10	10	CCCTCCATCCACTCCGTCTGGCGCG	7	+	771	879
ENSDARG00000002776	ENSDART00000026904	17	10	10	TCCATCCACTCCGTCTGGCGCGGGA	7	+	774	879
ENSDARG00000002776	ENSDART00000026904	17	10	10	AGCAGCAAAAAGGATTTGGATTC	5	+	736	879
ENSDARG00000002776	ENSDART00000026904	17	10	10	AAAGCCAAACAGAGGAAGAGGAA	5	+	862	879
ENSDARG00000002871	ENSDART00000026264	17	1	1	GACTCCAACGTCAAGGTGGCGGT	5	+	16	4533
ENSDARG00000002871	ENSDART00000026264	17	1	1	GACTCCAACGTCAAGGTGGCGGTT	6	+	16	4533
ENSDARG00000002871	ENSDART00000026264	17	1	1	TTCGGCCCATGAACCGGAGAGGTG	6	+	44	4533
ENSDARG00000002871	ENSDART00000026264	17	5	5	GTACTACACCAGCGAGAGGAAGAA	6	+	412	4533
ENSDARG00000002871	ENSDART00000026264	17	5	5	GAAAGCTTCACAGTGGAAGTCTCT	6	+	433	4533
ENSDARG00000002871	ENSDART00000026264	17	5	5	TACTACACCAGCGAGAGGAAGAA	5	+	413	4533
ENSDARG00000002871	ENSDART00000026264	17	7	7	GGCGGCCACCAATATGAATGAGGA	6	+	639	4533
ENSDARG00000002871	ENSDART00000026264	17	7	7	ATCCTCACACACACTCTGAAGGA	5	+	694	4533
ENSDARG00000002871	ENSDART00000026264	17	8	8	TGCAAAGACGGGCGCTGCAGGCGAG	7	+	789	4533
ENSDARG00000002871	ENSDART00000026264	17	8	8	AGCTGCAAAGACGGGCGCTGCAGGC	7	+	786	4533
ENSDARG00000002871	ENSDART00000026264	17	10	10	ATCGTCAACCACGCTGTGGTCAAC	6	+	1066	4533
ENSDARG00000002871	ENSDART00000026264	17	10	10	AGCATCGTCAACCACGCTGTGGTC	6	+	1063	4533
ENSDARG00000002871	ENSDART00000026264	17	12	12	AGAAGCAGCTGGAGAGCCTTGGAA	6	+	1286	4533
ENSDARG00000002871	ENSDART00000026264	17	13	13	ACATCCAGCTATGCGGAATGGGCA	6	+	1448	4533
ENSDARG00000002871	ENSDART00000026264	17	13	13	AACATCACACCTGAGGGAGCCGTC	6	+	1495	4533
ENSDARG00000002871	ENSDART00000026264	17	13	13	ACATCACACCTGAGGGAGCCGTC	5	+	1496	4533
ENSDARG00000002871	ENSDART00000026264	17	15	15	GGCGCCTGCGGGGTGAGGAAGAG	5	+	1649	4533
ENSDARG00000002871	ENSDART00000026264	17	15	15	GTCAGCTTCAGCTACGAGTTTGCT	6	+	1759	4533
ENSDARG00000002871	ENSDART00000026264	17	15	15	TTCCAAAGAGGCGCCTGCGGGGTG	6	+	1640	4533
ENSDARG00000002871	ENSDART00000026264	17	15	15	AGAGGCGCCTGCGGGGTGAGGAA	5	+	1646	4533
ENSDARG00000002871	ENSDART00000026264	17	16	16	ACCCCATGCAAGCTGTTTTGCAGTC	7	+	1820	4533
ENSDARG00000002871	ENSDART00000026264	17	16	16	CTAGACCCCATGCAAGCTGTTTTG	6	+	1816	4533
ENSDARG00000002871	ENSDART00000026264	17	16	16	AGCGCCAGCATGAGGAGGAGAAGCG	7	+	1850	4533
ENSDARG00000002871	ENSDART00000026264	17	16	16	AGCTGCAGCAGCTGCGCAGACAAC	6	+	1913	4533
ENSDARG00000002871	ENSDART00000026264	17	16	16	AGCGTCAGCGGCTGATGTATGAGCA	7	+	1886	4533
ENSDARG00000002871	ENSDART00000026264	17	17	17	TACCGCAGCATGGAGAGACTGAGTC	7	+	1957	4533
ENSDARG00000002871	ENSDART00000026264	17	19	19	GCAAGCAAATCTGGGCTCTTGAGAA	7	+	2258	4533
ENSDARG00000002871	ENSDART00000026264	17	21	21	GTCGACTGCATGTGGAGGTGATGAG	7	+	2510	4533
ENSDARG00000002871	ENSDART00000026264	17	22	22	TACCTCTCCAATTTTGTCTTTTGTC	7	+	2662	4533
ENSDARG00000002871	ENSDART00000026264	17	22	22	AGACCCCCACTGTATGGTGGTGTTC	7	+	2766	4533
ENSDARG00000002871	ENSDART00000026264	17	22	22	AGACCCCCACTGTATGGTGGTGTT	6	+	2766	4533
ENSDARG00000002871	ENSDART00000026264	17	22	22	GACCCCCACTGTATGGTGGTGTT	5	+	2767	4533
ENSDARG00000002871	ENSDART00000026264	17	22	22	GACCCCCACTGTATGGTGGTGTTC	6	+	2767	4533
ENSDARG00000002871	ENSDART00000026264	17	22	22	TACCTCTCCAATTTTGTCTTTTGT	6	+	2662	4533
ENSDARG00000002871	ENSDART00000026264	17	28	28	GCCCTCTGCTGGCAGTGGAATAC	5	+	3456	4533
ENSDARG00000002871	ENSDART00000026264	17	30	30	GACTTCAGCTCTCAGGAGAATCT	5	+	3559	4533
ENSDARG00000002871	ENSDART00000026264	17	30	30	GTCAAACACTATGATGGAGAGGTG	6	+	3658	4533
ENSDARG00000002871	ENSDART00000026264	17	31	31	AAATGCAGCTCGTCCTGCGCAAAC	6	+	3803	4533
ENSDARG00000002871	ENSDART00000026264	17	32	32	GCACTATTCCAGGCTGTGGTGTG	5	+	3896	4533
ENSDARG00000002871	ENSDART00000026264	17	33	33	TCCTCACACTGGACCGCCTGAGAC	6	+	4076	4533
ENSDARG00000002871	ENSDART00000026264	17	33	33	CAAATCCTCAGATAATGAAGCTGCC	7	+	4011	4533
ENSDARG00000002871	ENSDART00000026264	17	33	33	ATCCTCACACTGGACCGCCTGAGAC	7	+	4075	4533
ENSDARG00000002871	ENSDART00000026264	17	37	37	TGCCCAAGCTGCTCAAGTCGCTGTT	7	+	4403	4533
ENSDARG00000002871	ENSDART00000026264	17	38	38	ACAGCCAACAACCCTGATGAAGGA	6	+	4504	4533
ENSDARG00000002871	ENSDART00000046222	17	3	3	GTCGACTGCATGTGGAGGTGATGAG	7	+	209	2109
ENSDARG00000002871	ENSDART00000046222	17	4	4	TACCTCTCCAATTTTGTCTTTTGTC	7	+	361	2109
ENSDARG00000002871	ENSDART00000046222	17	4	4	TACCTCTCCAATTTTGTCTTTTGT	6	+	361	2109
ENSDARG00000002871	ENSDART00000046222	17	4	4	GACCCCCACTGTATGGTGGTGTTC	6	+	466	2109
ENSDARG00000002871	ENSDART00000046222	17	4	4	GACCCCCACTGTATGGTGGTGTT	5	+	466	2109
ENSDARG00000002871	ENSDART00000046222	17	4	4	AGACCCCCACTGTATGGTGGTGTT	6	+	465	2109
ENSDARG00000002871	ENSDART00000046222	17	4	4	AGACCCCCACTGTATGGTGGTGTTC	7	+	465	2109
ENSDARG00000002871	ENSDART00000046222	17	9	9	GCCCTCTGCTGGCAGTGGAATAC	5	+	1125	2109
ENSDARG00000002871	ENSDART00000046222	17	11	11	GTCAAACACTATGATGGAGAGGTG	6	+	1327	2109
ENSDARG00000002871	ENSDART00000046222	17	11	11	GACTTCAGCTCTCAGGAGAATCT	5	+	1228	2109
ENSDARG00000002871	ENSDART00000046222	17	12	12	AAATGCAGCTCGTCCTGCGCAAAC	6	+	1472	2109
ENSDARG00000002871	ENSDART00000046222	17	13	13	GCACTATTCCAGGCTGTGGTGTG	5	+	1565	2109
ENSDARG00000002871	ENSDART00000046222	17	14	14	CAAATCCTCAGATAATGAAGCTGCC	7	+	1683	2109
ENSDARG00000002871	ENSDART00000046222	17	14	14	ATCCTCACACTGGACCGCCTGAGAC	7	+	1747	2109
ENSDARG00000002871	ENSDART00000046222	17	14	14	TCCTCACACTGGACCGCCTGAGAC	6	+	1748	2109
ENSDARG00000002871	ENSDART00000046222	17	18	18	TGCCCAAGCTGCTCAAGTCGCTGTT	7	+	2072	2109
ENSDARG00000002871	ENSDART00000058858	17	1	1	TACCGCAGCATGGAGAGACTGAGTC	7	+	148	2682
ENSDARG00000002871	ENSDART00000058858	17	1	1	AGCGCCAGCATGAGGAGGAGAAGCG	7	+	5	2682
ENSDARG00000002871	ENSDART00000058858	17	1	1	AGCGTCAGCGGCTGATGTATGAGCA	7	+	41	2682
ENSDARG00000002871	ENSDART00000058858	17	1	1	AGCTGCAGCAGCTGCGCAGACAAC	6	+	68	2682
ENSDARG00000002871	ENSDART00000058858	17	3	3	GCAAGCAAATCTGGGCTCTTGAGAA	7	+	449	2682
ENSDARG00000002871	ENSDART00000058858	17	5	5	GTCGACTGCATGTGGAGGTGATGAG	7	+	701	2682
ENSDARG00000002871	ENSDART00000058858	17	6	6	TACCTCTCCAATTTTGTCTTTTGTC	7	+	853	2682
ENSDARG00000002871	ENSDART00000058858	17	6	6	TACCTCTCCAATTTTGTCTTTTGT	6	+	853	2682
ENSDARG00000002871	ENSDART00000058858	17	6	6	GACCCCCACTGTATGGTGGTGTTC	6	+	958	2682
ENSDARG00000002871	ENSDART00000058858	17	6	6	GACCCCCACTGTATGGTGGTGTT	5	+	958	2682
ENSDARG00000002871	ENSDART00000058858	17	6	6	AGACCCCCACTGTATGGTGGTGTT	6	+	957	2682
ENSDARG00000002871	ENSDART00000058858	17	6	6	AGACCCCCACTGTATGGTGGTGTTC	7	+	957	2682
ENSDARG00000002871	ENSDART00000058858	17	12	12	GCCCTCTGCTGGCAGTGGAATAC	5	+	1647	2682
ENSDARG00000002871	ENSDART00000058858	17	14	14	GTCAAACACTATGATGGAGAGGTG	6	+	1849	2682
ENSDARG00000002871	ENSDART00000058858	17	14	14	GACTTCAGCTCTCAGGAGAATCT	5	+	1750	2682
ENSDARG00000002871	ENSDART00000058858	17	15	15	AAATGCAGCTCGTCCTGCGCAAAC	6	+	1994	2682
ENSDARG00000002871	ENSDART00000058858	17	16	16	GCACTATTCCAGGCTGTGGTGTG	5	+	2087	2682
ENSDARG00000002871	ENSDART00000058858	17	17	17	ATCCTCACACTGGACCGCCTGAGAC	7	+	2269	2682
ENSDARG00000002871	ENSDART00000058858	17	17	17	CAAATCCTCAGATAATGAAGCTGCC	7	+	2205	2682
ENSDARG00000002871	ENSDART00000058858	17	17	17	TCCTCACACTGGACCGCCTGAGAC	6	+	2270	2682
ENSDARG00000002871	ENSDART00000058858	17	21	21	TGCCCAAGCTGCTCAAGTCGCTGTT	7	+	2594	2682
ENSDARG00000002916	ENSDART00000014190	17	2	2	AACTGCTGCGCTGCGGTGCCTGC	5	-	85	2877
ENSDARG00000002916	ENSDART00000014190	17	2	2	GGCGTCTAACTGCTGCGCTGCGGTG	7	-	90	2877
ENSDARG00000002916	ENSDART00000014190	17	5	5	CACCACTGCTTTCCCGCTGGGGTT	6	-	568	2877
ENSDARG00000002916	ENSDART00000014190	17	7	7	TCCAGCACAGGATGCGGTTGTCTTT	7	-	847	2877
ENSDARG00000002916	ENSDART00000014190	17	8	8	AAACACCACTGATTGGCTGTCGGC	6	-	903	2877
ENSDARG00000002916	ENSDART00000014190	17	9	9	GCCTCCGCACCCACTTTGGAGGC	5	-	1161	2877
ENSDARG00000002916	ENSDART00000014190	17	9	9	GGCCTCCGCACCCACTTTGGAGGC	6	-	1161	2877
ENSDARG00000002916	ENSDART00000014190	17	9	9	CTCCGCACCCACTTTGGAGGCTTT	6	-	1158	2877
ENSDARG00000002916	ENSDART00000014190	17	9	9	CGCACCCACTTTGGAGGCTTTTTT	6	-	1155	2877
ENSDARG00000002916	ENSDART00000014190	17	9	9	CTCCGCACCCACTTTGGAGGCTTTT	7	-	1157	2877
ENSDARG00000002916	ENSDART00000014190	17	10	10	ACATGCACCTGTCGAGGGAGTGGAT	7	-	1271	2877
ENSDARG00000002916	ENSDART00000014190	17	13	13	ACATACTGCTGCTCTCTGATGAT	5	-	1659	2877
ENSDARG00000002916	ENSDART00000014190	17	15	15	TGCTCACCATGGAGATGCTGTTGGT	7	-	1894	2877
ENSDARG00000002916	ENSDART00000014190	17	16	16	AGCAAACTCCTCGGGGTTAGCGTAG	7	-	2004	2877
ENSDARG00000002916	ENSDART00000014190	17	16	16	GCAAACTCCTCGGGGTTAGCGTAG	6	-	2004	2877
ENSDARG00000002916	ENSDART00000014190	17	16	16	AAACTCCTCGGGGTTAGCGTAGGTT	7	-	2001	2877
ENSDARG00000002916	ENSDART00000014190	17	19	19	ATCCTCACCGTTGTGTGTGCTGCA	6	-	2469	2877
ENSDARG00000002916	ENSDART00000014190	17	19	19	GCCTCCTGCTGGAGCTGAGGGTTTC	7	-	2415	2877
ENSDARG00000002916	ENSDART00000014190	17	19	19	AGCGCCTCCTGCTGGAGCTGAGGGT	7	-	2418	2877
ENSDARG00000002916	ENSDART00000014190	17	20	20	ATCTCACCACTGTGTGTGCTGCA	5	-	2480	2877
ENSDARG00000002916	ENSDART00000014190	17	22	22	CCCGGCGGCCCCCAGAGACGGATAC	7	-	2784	2877
ENSDARG00000003049	ENSDART00000019285	17	1	1	TTCTCCCACCATCGGAGGCATAA	5	-	916	921
ENSDARG00000003049	ENSDART00000019285	17	1	1	TTATGCGTCTCGTTGCTGGAGTT	5	-	31	921
ENSDARG00000003049	ENSDART00000019285	17	1	1	GTTCTCCCACCATCGGAGGCATAA	6	-	916	921
ENSDARG00000003049	ENSDART00000019285	17	1	1	GAACCAAACGGCCAGTGGTGAAGTA	7	-	260	921
ENSDARG00000003049	ENSDART00000019285	17	1	1	CTAGACACACCACGGAGTAGATGAA	7	-	91	921
ENSDARG00000003049	ENSDART00000019285	17	1	1	CGCTACAGACCCATCAGAGTTGGGC	7	-	501	921
ENSDARG00000003049	ENSDART00000019285	17	1	1	CCCATCAGAGTTGGGCGCAGTGGTG	7	-	492	921
ENSDARG00000003049	ENSDART00000019285	17	1	1	CCCAAAATCACAGCCAGCTGACTAA	7	-	815	921
ENSDARG00000003049	ENSDART00000019285	17	1	1	CAACTAGACACACCACGGAGTAGAT	7	-	94	921
ENSDARG00000003049	ENSDART00000019285	17	1	1	AGACCCATCAGAGTTGGGCGCAGTG	7	-	495	921
ENSDARG00000003049	ENSDART00000019285	17	1	1	AGACACACCACGGAGTAGATGAA	5	-	91	921
ENSDARG00000003049	ENSDART00000019285	17	1	1	ACCATCATCACCATCAGCGTGATTT	7	-	707	921
ENSDARG00000003049	ENSDART00000019285	17	1	1	ACACACCACGGAGTAGATGAAGGA	6	-	88	921
ENSDARG00000003049	ENSDART00000019285	17	1	1	AAACCAAGCGACACAGGAGAGAAC	6	-	281	921
ENSDARG00000003049	ENSDART00000019285	17	1	1	AAAATCCTCTGGAAGGAGCGTCT	5	-	895	921
ENSDARG00000003234	ENSDART00000012271	17	2	2	CACATCTTCACAACTGGATGAGCT	6	+	120	1629
ENSDARG00000003234	ENSDART00000012271	17	3	3	AACCACAACGGAAAGACGATGTT	5	+	211	1629
ENSDARG00000003234	ENSDART00000012271	17	3	3	AACATCAACCAGCTTTTGCAGCA	5	+	235	1629
ENSDARG00000003234	ENSDART00000012271	17	5	5	ATCTCAAGCGGAACTTTGTCTCT	5	+	506	1629
ENSDARG00000003234	ENSDART00000012271	17	8	8	AACTCCAAAGCAAAGAGGCAGAC	5	+	899	1629
ENSDARG00000003234	ENSDART00000012271	17	8	8	CTCCAAAGCAAAGAGGCAGACTTC	6	+	901	1629
ENSDARG00000003234	ENSDART00000012271	17	8	8	TCCAAAGCAAAGAGGCAGACTTC	5	+	902	1629
ENSDARG00000003234	ENSDART00000012271	17	13	13	GGCTCAGCAGGCCGTGGCCTTTGGC	7	+	1491	1629
ENSDARG00000003381	ENSDART00000014375	17	2	2	GCAGACAGACGTCACAGCGGTGGTG	7	+	216	1650
ENSDARG00000003381	ENSDART00000014375	17	2	2	GACGTCACAGCGGTGGTGAGGAC	5	+	223	1650
ENSDARG00000003381	ENSDART00000014375	17	2	2	ACCTTCAACAGCTGAAGAATTTGAC	7	+	149	1650
ENSDARG00000003381	ENSDART00000014375	17	2	2	ACAGACGTCACAGCGGTGGTGAGGA	7	+	220	1650
ENSDARG00000003381	ENSDART00000014375	17	2	2	ACAGACGTCACAGCGGTGGTGAG	5	+	220	1650
ENSDARG00000003381	ENSDART00000014375	17	9	9	CCCGTCAGCGCACTGGGAGTTTGC	6	+	683	1650
ENSDARG00000003381	ENSDART00000014375	17	9	9	CCCGTCAGCGCACTGGGAGTTTGCT	7	+	683	1650
ENSDARG00000003381	ENSDART00000014375	17	9	9	GTCAGCGCACTGGGAGTTTGCTGAG	7	+	686	1650
ENSDARG00000003381	ENSDART00000014375	17	9	9	TCCCCCGTCAGCGCACTGGGAGTTT	7	+	680	1650
ENSDARG00000003381	ENSDART00000014375	17	10	10	TACCCAGACAAGTCTCGCCGCAGCA	7	+	883	1650
ENSDARG00000003381	ENSDART00000014375	17	14	14	GACGGCTTCAAAACTGGAGAAGTC	6	+	1402	1650
ENSDARG00000003381	ENSDART00000052439	17	2	2	GTCAGCGCACTGGGAGTTTGCTGAG	7	+	107	1071
ENSDARG00000003381	ENSDART00000052439	17	2	2	CCCGTCAGCGCACTGGGAGTTTGCT	7	+	104	1071
ENSDARG00000003381	ENSDART00000052439	17	2	2	CCCGTCAGCGCACTGGGAGTTTGC	6	+	104	1071
ENSDARG00000003381	ENSDART00000052439	17	3	3	TACCCAGACAAGTCTCGCCGCAGCA	7	+	304	1071
ENSDARG00000003381	ENSDART00000052439	17	7	7	GACGGCTTCAAAACTGGAGAAGTC	6	+	823	1071
ENSDARG00000003411	ENSDART00000014296	17	2	2	TTAAAAGACAGCGAGTGGCGGATAG	7	-	602	1227
ENSDARG00000003411	ENSDART00000014296	17	2	2	TTAAAAGACAGCGAGTGGCGGAT	5	-	604	1227
ENSDARG00000003411	ENSDART00000014296	17	2	2	TGCTGCTCCGAGGACATTAGGTTGT	7	-	1043	1227
ENSDARG00000003411	ENSDART00000014296	17	2	2	GTTAGCTGCTGTCATGTTTGCAGTC	7	-	165	1227
ENSDARG00000003411	ENSDART00000014296	17	2	2	GTCAGCATCTTACTGGGTGATTGC	6	-	504	1227
ENSDARG00000003411	ENSDART00000014296	17	2	2	GTCAGCATCTTACTGGGTGATTG	5	-	505	1227
ENSDARG00000003411	ENSDART00000014296	17	2	2	AGATGCTGCGCCTGGGAGGTCGGG	6	-	933	1227
ENSDARG00000003642	ENSDART00000013093	17	4	4	GACAACGCCGTGAGTCTGATTTC	5	+	307	1212
ENSDARG00000003642	ENSDART00000013093	17	4	4	GAACGCCTCAACAAGCTGAAGGA	5	+	367	1212
ENSDARG00000003642	ENSDART00000013093	17	4	4	GAAACCGTCATCCAGAGCGGCAGGA	7	+	276	1212
ENSDARG00000003642	ENSDART00000013093	17	4	4	CGCCTCAACAAGCTGAAGGAGGA	5	+	370	1212
ENSDARG00000003642	ENSDART00000013093	17	4	4	GCCTCAACAAGCTGAAGGAGGAGAC	7	+	371	1212
ENSDARG00000003642	ENSDART00000013093	17	4	4	AGACAACGCCGTGAGTCTGATTTC	6	+	306	1212
ENSDARG00000003642	ENSDART00000013093	17	4	4	AGACAACGCCGTGAGTCTGATTT	5	+	306	1212
ENSDARG00000003642	ENSDART00000013093	17	4	4	ACCGTCATCCAGAGCGGCAGGAGCA	7	+	279	1212
ENSDARG00000003642	ENSDART00000013093	17	4	4	AAAGACAACGCCGTGAGTCTGATTT	7	+	304	1212
ENSDARG00000003642	ENSDART00000013093	17	5	5	ACCTTCAGAGAAGGAGCTGGAGTC	6	+	411	1212
ENSDARG00000003642	ENSDART00000013093	17	5	5	GACTGCAGAAATGGAGGAGCGTCT	6	+	477	1212
ENSDARG00000003642	ENSDART00000013093	17	5	5	ATCGACTGCAGAAATGGAGGAGCG	6	+	474	1212
ENSDARG00000003642	ENSDART00000013093	17	6	6	CTAATCACACAGATGACGGAGGA	5	+	595	1212
ENSDARG00000003642	ENSDART00000013093	17	7	7	ACAAACACAGCCAGCAGATGACGCT	7	+	794	1212
ENSDARG00000003642	ENSDART00000013093	17	7	7	GACAAACACAGCCAGCAGATGAC	5	+	793	1212
ENSDARG00000003642	ENSDART00000013093	17	7	7	AAACACAGCCAGCAGATGACGCT	5	+	796	1212
ENSDARG00000003642	ENSDART00000013093	17	7	7	ACAGCCAGCAGATGACGCTGGAGAT	7	+	800	1212
ENSDARG00000003642	ENSDART00000013093	17	7	7	GCCAGCAGATGACGCTGGAGATGGC	7	+	803	1212
ENSDARG00000003642	ENSDART00000013093	17	10	10	TGCAGCTCCGATCCGGCGGCTGGA	6	+	1077	1212
ENSDARG00000003642	ENSDART00000013093	17	10	10	TCCGGCGGCTGGATGATGATGAC	5	+	1088	1212
ENSDARG00000003642	ENSDART00000013093	17	10	10	GAAGCCCTCGATGCAGAAGTCTAA	6	+	1035	1212
ENSDARG00000003642	ENSDART00000093255	17	2	2	GACAACGCCGTGAGTCTGATTTC	5	+	133	1038
ENSDARG00000003642	ENSDART00000093255	17	2	2	GAACGCCTCAACAAGCTGAAGGA	5	+	193	1038
ENSDARG00000003642	ENSDART00000093255	17	2	2	GAAACCGTCATCCAGAGCGGCAGGA	7	+	102	1038
ENSDARG00000003642	ENSDART00000093255	17	2	2	CGCCTCAACAAGCTGAAGGAGGA	5	+	196	1038
ENSDARG00000003642	ENSDART00000093255	17	2	2	GCCTCAACAAGCTGAAGGAGGAGAC	7	+	197	1038
ENSDARG00000003642	ENSDART00000093255	17	2	2	AGACAACGCCGTGAGTCTGATTTC	6	+	132	1038
ENSDARG00000003642	ENSDART00000093255	17	2	2	AGACAACGCCGTGAGTCTGATTT	5	+	132	1038
ENSDARG00000003642	ENSDART00000093255	17	2	2	AAAGACAACGCCGTGAGTCTGATTT	7	+	130	1038
ENSDARG00000003642	ENSDART00000093255	17	2	2	ACCGTCATCCAGAGCGGCAGGAGCA	7	+	105	1038
ENSDARG00000003642	ENSDART00000093255	17	3	3	GACTGCAGAAATGGAGGAGCGTCT	6	+	303	1038
ENSDARG00000003642	ENSDART00000093255	17	3	3	ACCTTCAGAGAAGGAGCTGGAGTC	6	+	237	1038
ENSDARG00000003642	ENSDART00000093255	17	3	3	ATCGACTGCAGAAATGGAGGAGCG	6	+	300	1038
ENSDARG00000003642	ENSDART00000093255	17	4	4	CTAATCACACAGATGACGGAGGA	5	+	421	1038
ENSDARG00000003642	ENSDART00000093255	17	5	5	ACAAACACAGCCAGCAGATGACGCT	7	+	620	1038
ENSDARG00000003642	ENSDART00000093255	17	5	5	ACAGCCAGCAGATGACGCTGGAGAT	7	+	626	1038
ENSDARG00000003642	ENSDART00000093255	17	5	5	GACAAACACAGCCAGCAGATGAC	5	+	619	1038
ENSDARG00000003642	ENSDART00000093255	17	5	5	AAACACAGCCAGCAGATGACGCT	5	+	622	1038
ENSDARG00000003642	ENSDART00000093255	17	5	5	GCCAGCAGATGACGCTGGAGATGGC	7	+	629	1038
ENSDARG00000003642	ENSDART00000093255	17	7	7	AGAGGCCGCTATTAGACGAGTTT	5	+	780	1038
ENSDARG00000003642	ENSDART00000093255	17	9	9	TGCAGCTCCGATCCGGCGGCTGGA	6	+	903	1038
ENSDARG00000003642	ENSDART00000093255	17	9	9	TCCGGCGGCTGGATGATGATGAC	5	+	914	1038
ENSDARG00000003642	ENSDART00000093255	17	9	9	GAAGCCCTCGATGCAGAAGTCTAA	6	+	861	1038
ENSDARG00000003706	ENSDART00000026272	17	1	1	TTCTCCCACTGTGTGCGGCTGGA	5	-	37	2415
ENSDARG00000003706	ENSDART00000026272	17	2	2	AAAAGCAGAACGTTGTAGAATAA	5	-	379	2415
ENSDARG00000003706	ENSDART00000026272	17	2	2	TTCTCCTAATGTGTTTTCTGATGTT	7	-	319	2415
ENSDARG00000003706	ENSDART00000026272	17	2	2	TCCATCCACTCAAGAAGATGTGGTA	7	-	451	2415
ENSDARG00000003706	ENSDART00000026272	17	2	2	GCAAGCCCAAAAAGGCATGAGTG	5	-	405	2415
ENSDARG00000003706	ENSDART00000026272	17	3	3	TGCCTCTTCAGACATAAGCCGAA	5	-	664	2415
ENSDARG00000003706	ENSDART00000026272	17	7	7	GCCAACAACCTCATGTTGTAGAA	5	-	1012	2415
ENSDARG00000003706	ENSDART00000026272	17	9	9	CTCCACATCATCAGTGGTTGATGAA	7	-	1128	2415
ENSDARG00000003706	ENSDART00000026272	17	9	9	GTAACCTTCAGACAGTAGTAGCC	5	-	1288	2415
ENSDARG00000003706	ENSDART00000026272	17	9	9	ACCTTCAGACAGTAGTAGCCGAT	5	-	1285	2415
ENSDARG00000003706	ENSDART00000026272	17	12	12	AACCCAGCAGCTCACTGACGCGTGC	7	-	1513	2415
ENSDARG00000003706	ENSDART00000026272	17	12	12	CCCAGCAGCTCACTGACGCGTGC	5	-	1513	2415
ENSDARG00000003706	ENSDART00000026272	17	13	13	TACTTCACATCAGTGGTGTTTAA	5	-	1615	2415
ENSDARG00000003706	ENSDART00000026272	17	15	15	TTCACCGTCTTCACTTTTGTTGTA	6	-	1900	2415
ENSDARG00000003706	ENSDART00000026272	17	16	16	AAACTCGTCTCCTGCTGGGTCTTC	6	-	2017	2415
ENSDARG00000003706	ENSDART00000026272	17	16	16	CTCAAACTCGTCTCCTGCTGGGTCT	7	-	2019	2415
ENSDARG00000003706	ENSDART00000026272	17	16	16	CTCAAACTCGTCTCCTGCTGGGTC	6	-	2020	2415
ENSDARG00000003706	ENSDART00000026272	17	20	20	AACATCTTCCACACGTATGATTC	5	-	2332	2415
ENSDARG00000003813	ENSDART00000018678	17	1	1	GCCACCATCATCAATGAGGAGGTA	6	+	67	1512
ENSDARG00000003813	ENSDART00000018678	17	4	4	AACGTCATCATGTTTGTGGGTCTGC	7	+	313	1512
ENSDARG00000003813	ENSDART00000018678	17	4	4	AACGTCATCATGTTTGTGGGTCT	5	+	313	1512
ENSDARG00000003813	ENSDART00000018678	17	4	4	AACCACAACATGTTCTAAGGTGAG	6	+	351	1512
ENSDARG00000003813	ENSDART00000018678	17	4	4	AACAACGTCATCATGTTTGTGGGT	6	+	310	1512
ENSDARG00000003813	ENSDART00000018678	17	9	9	AACTCAGCCCTTCATAAGCAAAC	5	+	867	1512
ENSDARG00000003813	ENSDART00000018678	17	9	9	AAACTCAGCCCTTCATAAGCAAAC	6	+	866	1512
ENSDARG00000003813	ENSDART00000018678	17	14	14	GTCAACCCATCACAGATGGCGAA	5	+	1357	1512
ENSDARG00000003902	ENSDART00000017756	17	2	1	TGCTGCTGCTTTTCTGGCTGTTGCC	7	+	27	1002
ENSDARG00000003902	ENSDART00000017756	17	4	3	AAAGGCTGCTGTGGTGCCTGATAC	6	+	348	1002
ENSDARG00000003902	ENSDART00000017756	17	6	5	GTTGACATCGCCAGTGGGGATGAA	6	+	697	1002
ENSDARG00000003902	ENSDART00000017756	17	6	5	TTCAACCCAAGCACTGTAGGTGCC	6	+	658	1002
ENSDARG00000003925	ENSDART00000012889	17	1	1	CTCTCCCTCATGGACGTCTGTGTAC	7	-	315	795
ENSDARG00000003925	ENSDART00000012889	17	1	1	CACCAAAGACCACCACGCTTTTTTC	7	-	359	795
ENSDARG00000003925	ENSDART00000012889	17	1	1	ACCAAAGACCACCACGCTTTTTTC	6	-	359	795
ENSDARG00000003940	ENSDART00000007271	17	5	4	TGCATCACCAGCAGTGGCGTAGGCC	7	-	275	927
ENSDARG00000003940	ENSDART00000007271	17	5	4	CGCGTCGGCCTTCTCTTCTGAAGTT	7	-	319	927
ENSDARG00000003940	ENSDART00000007271	17	5	4	CACTCATGCCTCAGTGGACGAGTGT	7	-	248	927
ENSDARG00000003940	ENSDART00000007271	17	5	4	AGCTCATCCTGTAACGCTGTGGTG	6	-	384	927
ENSDARG00000003940	ENSDART00000007271	17	5	4	TGCATCACCAGCAGTGGCGTAGGC	6	-	276	927
ENSDARG00000003940	ENSDART00000007271	17	6	5	ATCAGCAAAGCTTGTTGATTTGGAC	7	-	753	927
ENSDARG00000003940	ENSDART00000007271	17	6	5	GACAAAAGAGGCTGTGGGAGGGG	5	-	545	927
ENSDARG00000003940	ENSDART00000007271	17	6	5	GACAAAAGAGGCTGTGGGAGGGGGC	7	-	543	927
ENSDARG00000003940	ENSDART00000007271	17	6	5	GACATCAGCAAAGCTTGTTGATTTG	7	-	756	927
ENSDARG00000003940	ENSDART00000007271	17	7	6	CGCTTCAGATATTAGAGAGGCAGAA	7	-	864	927
ENSDARG00000003998	ENSDART00000006676	17	2	2	CCCAGCAGATTTTAAAGGAGTCGCA	7	-	190	1125
ENSDARG00000003998	ENSDART00000006676	17	3	3	ACCGCCTTAGCAACAAGCTTTGTAG	7	-	314	1125
ENSDARG00000003998	ENSDART00000006676	17	4	4	ATCACCTGCAGTGTTGGAAGTATTC	7	-	580	1125
ENSDARG00000003998	ENSDART00000006676	17	5	5	ACAGTCGCATCAGAAAGCGGTTGTT	7	-	922	1125
ENSDARG00000003998	ENSDART00000006676	17	5	5	GTTCCCAGAGCTAGCGGCAGCGGCT	7	-	1013	1125
ENSDARG00000003998	ENSDART00000006676	17	5	5	GTCCCCAAAGTAAAGGCGTGTGT	5	-	791	1125
ENSDARG00000003998	ENSDART00000006676	17	5	5	CGCATCAGAAAGCGGTTGTTGGT	5	-	919	1125
ENSDARG00000004026	ENSDART00000012932	17	1	1	TTCCTCCTCGGAGGAGGCGTAGCT	6	-	844	1470
ENSDARG00000004026	ENSDART00000012932	17	1	1	TTCCTCCACTGGCACAGCAGCAGCA	7	-	1391	1470
ENSDARG00000004026	ENSDART00000012932	17	1	1	TACGGCGTCCAGGTGAGGATGAA	5	-	1219	1470
ENSDARG00000004026	ENSDART00000012932	17	1	1	GTTTGCTGCCCACGGCCGGGTTC	5	-	1452	1470
ENSDARG00000004026	ENSDART00000012932	17	1	1	GCCAGCACAAAATCGGAGGAGCC	5	-	480	1470
ENSDARG00000004026	ENSDART00000012932	17	1	1	CACAGCAGCAGCATGCGGAAGGT	5	-	1381	1470
ENSDARG00000004026	ENSDART00000012932	17	1	1	AGCGTCTCCGCTGGAATTTGTTGAC	7	-	699	1470
ENSDARG00000004026	ENSDART00000012932	17	1	1	ACCGTCTTCAGCTGGCTGTTGAC	5	-	163	1470
ENSDARG00000004026	ENSDART00000012932	17	1	1	AAACAAGACCGTATCTTTTGAGGCT	7	-	725	1470
ENSDARG00000004026	ENSDART00000012932	17	1	1	AAACAAGACCGTATCTTTTGAGGC	6	-	726	1470
ENSDARG00000004158	ENSDART00000048930	17	1	1	ATCAGCAGAATTATGTGGCGCTGGA	7	-	53	1743
ENSDARG00000004158	ENSDART00000048930	17	1	1	ATCATCAGCAGAATTATGTGGCGCT	7	-	56	1743
ENSDARG00000004158	ENSDART00000048930	17	9	9	ACCAAACGCGCTTTTTGCTTGAGAG	7	-	741	1743
ENSDARG00000004158	ENSDART00000048930	17	12	12	GTACTCAAAGAAAGACGAATAGTAC	7	-	1125	1743
ENSDARG00000004158	ENSDART00000048930	17	16	16	CTCACCAAAAGGTACGATGACGGG	6	-	1564	1743
ENSDARG00000004158	ENSDART00000048930	17	17	17	CACAACAACTTGACTGATGGCGGC	6	-	1675	1743
ENSDARG00000004158	ENSDART00000074802	17	1	1	AGACCCTGCAGGACGCTGCTGCG	5	-	124	2388
ENSDARG00000004158	ENSDART00000074802	17	1	1	AGCCACAGCACAACGTTGATGGC	5	-	175	2388
ENSDARG00000004158	ENSDART00000074802	17	1	1	CACAGCACAACGTTGATGGCGAG	5	-	172	2388
ENSDARG00000004158	ENSDART00000074802	17	3	3	GTTTTCTCCTTCTCGCTTTGTTC	5	-	301	2388
ENSDARG00000004158	ENSDART00000074802	17	5	5	ATCATCAGCAGAATTATGTGGCGCT	7	-	461	2388
ENSDARG00000004158	ENSDART00000074802	17	5	5	ATCAGCAGAATTATGTGGCGCTGGA	7	-	458	2388
ENSDARG00000004158	ENSDART00000074802	17	14	14	GTACTCAAAGAAAGACGAATAGTAC	7	-	1455	2388
ENSDARG00000004158	ENSDART00000074802	17	18	18	CTCACCAAAAGGTACGATGACGGG	6	-	1894	2388
ENSDARG00000004158	ENSDART00000074802	17	19	19	CACAACAACTTGACTGATGGCGGC	6	-	2005	2388
ENSDARG00000004158	ENSDART00000074802	17	21	21	GCATCCCGCACTGAACTCTGGCTGT	7	-	2285	2388
ENSDARG00000004265	ENSDART00000025410	17	3	3	ACACTCACCCAACGGTGCGGTTCT	6	-	352	918
ENSDARG00000004265	ENSDART00000025410	17	3	3	CACTCACCCAACGGTGCGGTTCT	5	-	352	918
ENSDARG00000004265	ENSDART00000025410	17	3	3	GCATCCACATGCACAGTGGGGTGAG	7	-	242	918
ENSDARG00000004265	ENSDART00000025410	17	5	5	AACTCCGACTAGTTGAGACGCAGCA	7	-	504	918
ENSDARG00000004265	ENSDART00000025410	17	7	7	CACAGCAGCATCCTGAAGTAAAC	5	-	788	918
ENSDARG00000004265	ENSDART00000105272	17	3	3	GCATCCACATGCACAGTGGGGTGAG	7	-	242	615
ENSDARG00000004265	ENSDART00000105272	17	3	3	CACTCACCCAACGGTGCGGTTCT	5	-	352	615
ENSDARG00000004265	ENSDART00000105272	17	3	3	ACACTCACCCAACGGTGCGGTTCT	6	-	352	615
ENSDARG00000004297	ENSDART00000015418	17	1	1	TCCGTCGTCTGATTTGGGGAAGCC	6	-	463	2007
ENSDARG00000004297	ENSDART00000015418	17	1	1	GTCTTCTAAACGTTCGTGGCAGAT	6	-	1777	2007
ENSDARG00000004297	ENSDART00000015418	17	1	1	GTCCAAGCCGGACTGTTGTTGTT	5	-	353	2007
ENSDARG00000004297	ENSDART00000015418	17	1	1	GTCACCAGAGCTATGCTTTTTCT	5	-	1100	2007
ENSDARG00000004297	ENSDART00000015418	17	1	1	GCCATCCACTGCTGTCTCTGCTGCT	7	-	1337	2007
ENSDARG00000004297	ENSDART00000015418	17	1	1	GCCACCAGCCCGTGATTGCGACGCG	7	-	518	2007
ENSDARG00000004297	ENSDART00000015418	17	1	1	CTCGCCGACGACGGTGGGCCGTT	5	-	595	2007
ENSDARG00000004297	ENSDART00000015418	17	1	1	CCCGACGCCACAGCCCGAGGCATGT	7	-	1247	2007
ENSDARG00000004297	ENSDART00000015418	17	1	1	ATCGCCCACGGCATGCGCGGCAGGT	7	-	86	2007
ENSDARG00000004297	ENSDART00000015418	17	1	1	ATCATCGCCCACGGCATGCGCGGCA	7	-	89	2007
ENSDARG00000004297	ENSDART00000015418	17	1	1	AGCTTCAGCGTTACGCTGTTTCT	5	-	749	2007
ENSDARG00000004297	ENSDART00000015418	17	1	1	AGAGGCTGCGAAAGAGCCTGATGC	6	-	1393	2007
ENSDARG00000004297	ENSDART00000015418	17	1	1	AGAAACGCACAGACTCTGGGAGTAA	7	-	1141	2007
ENSDARG00000004297	ENSDART00000015418	17	1	1	ACCTGCGCCGAAGACATGTTGAGCT	7	-	26	2007
ENSDARG00000004297	ENSDART00000015418	17	1	1	ACCAGCGCCGAGGGCAGCAGAGGGC	7	-	1220	2007
ENSDARG00000004297	ENSDART00000015418	17	1	1	AAACGCACAGACTCTGGGAGTAA	5	-	1141	2007
ENSDARG00000004297	ENSDART00000015418	17	1	1	AAACAAAACTTGTGGTTGGGAAC	5	-	1825	2007
ENSDARG00000004377	ENSDART00000037371	17	1	1	AGCGGCTGCCACCTCGCTGAAGTC	6	+	130	3126
ENSDARG00000004377	ENSDART00000037371	17	3	3	CAAGCCCTCCGAAAATGGGGTATGT	7	+	336	3126
ENSDARG00000004377	ENSDART00000037371	17	6	6	GCAGTCGGCCATGCTGAAGGTGGA	6	+	684	3126
ENSDARG00000004377	ENSDART00000037371	17	6	6	CGCAGCAGCTAGACGATCTGCGGCA	7	+	716	3126
ENSDARG00000004377	ENSDART00000037371	17	9	9	CCCTCCTTCAGCAGTAATAGGGT	5	+	1186	3126
ENSDARG00000004377	ENSDART00000037371	17	9	9	ACCTCCAGATTGGAAAGACGCAAAC	7	+	1218	3126
ENSDARG00000004377	ENSDART00000037371	17	10	10	CAACAAATCCAACAGCGGATTAC	5	+	1477	3126
ENSDARG00000004377	ENSDART00000037371	17	10	10	AACCTCCTCTTGCTGTTGCGGTG	5	+	1556	3126
ENSDARG00000004377	ENSDART00000037371	17	10	10	AAACTACTCCGGTAGCAGCAGAA	5	+	1689	3126
ENSDARG00000004377	ENSDART00000037371	17	10	10	GCCAAAAACTACTCCGGTAGCAGCA	7	+	1684	3126
ENSDARG00000004377	ENSDART00000037371	17	10	10	CACAACAAATCCAACAGCGGATTAC	7	+	1475	3126
ENSDARG00000004377	ENSDART00000037371	17	10	10	AACCTCCTCTTGCTGTTGCGGTGCG	7	+	1556	3126
ENSDARG00000004377	ENSDART00000037371	17	10	10	AAAAACTACTCCGGTAGCAGCAGAA	7	+	1687	3126
ENSDARG00000004377	ENSDART00000037371	17	10	10	AGAACCTCCTCTTGCTGTTGCGGTG	7	+	1554	3126
ENSDARG00000004377	ENSDART00000037371	17	11	11	TTCAACACCCTTGCAGGGGGTATTG	7	+	2053	3126
ENSDARG00000004377	ENSDART00000037371	17	11	11	CTCCTCCCACCGCTTCTGTGTCT	5	+	2225	3126
ENSDARG00000004377	ENSDART00000037371	17	11	11	TCCTCCTCCCACCGCTTCTGTGTCT	7	+	2223	3126
ENSDARG00000004377	ENSDART00000037371	17	12	12	GAACCCCACTCCCCTGCAGAGGAA	6	+	2392	3126
ENSDARG00000004377	ENSDART00000037371	17	12	12	CCCCACTCCCCTGCAGAGGAAGAC	6	+	2395	3126
ENSDARG00000004377	ENSDART00000037371	17	12	12	ACCCCACTCCCCTGCAGAGGAAGAC	7	+	2394	3126
ENSDARG00000004377	ENSDART00000037371	17	12	12	AGAACCCCACTCCCCTGCAGAGGAA	7	+	2391	3126
ENSDARG00000004377	ENSDART00000037371	17	14	14	GTAAAATTCCTGCTGGATTTTGGG	6	+	2674	3126
ENSDARG00000004377	ENSDART00000037371	17	15	15	GACGGCAGCAGACAAGTGTGAAGAG	7	+	2832	3126
ENSDARG00000004377	ENSDART00000037371	17	15	15	TGCCACTACTATCAGTGACGTGGAG	7	+	2808	3126
ENSDARG00000004377	ENSDART00000037371	17	16	16	TACCACGCAACTTGTTAGGGGTA	5	+	3077	3126
ENSDARG00000004377	ENSDART00000037371	17	16	16	GTACCACGCAACTTGTTAGGGGTA	6	+	3076	3126
ENSDARG00000004377	ENSDART00000091044	17	1	1	AGCGGCTGCCACCTCGCTGAAGTC	6	+	130	3102
ENSDARG00000004377	ENSDART00000091044	17	3	3	CAAGCCCTCCGAAAATGGGGTATGT	7	+	336	3102
ENSDARG00000004377	ENSDART00000091044	17	6	6	GCAGTCGGCCATGCTGAAGGTGGA	6	+	684	3102
ENSDARG00000004377	ENSDART00000091044	17	6	6	CGCAGCAGCTAGACGATCTGCGGCA	7	+	716	3102
ENSDARG00000004377	ENSDART00000091044	17	9	9	GTCCTATACATAATGCCTTGGCT	5	+	1181	3102
ENSDARG00000004377	ENSDART00000091044	17	10	10	CACTCAAACACCTGATTAGAAGTG	6	+	1262	3102
ENSDARG00000004377	ENSDART00000091044	17	11	11	ACCTCCAGATTGGAAAGACGCAAAC	7	+	1303	3102
ENSDARG00000004377	ENSDART00000091044	17	13	13	AGAACCTCCTCTTGCTGTTGCGGTG	7	+	1545	3102
ENSDARG00000004377	ENSDART00000091044	17	13	13	AAAAACTACTCCGGTAGCAGCAGAA	7	+	1678	3102
ENSDARG00000004377	ENSDART00000091044	17	13	13	GCCAAAAACTACTCCGGTAGCAGCA	7	+	1675	3102
ENSDARG00000004377	ENSDART00000091044	17	13	13	AAACTACTCCGGTAGCAGCAGAA	5	+	1680	3102
ENSDARG00000004377	ENSDART00000091044	17	13	13	AACCTCCTCTTGCTGTTGCGGTG	5	+	1547	3102
ENSDARG00000004377	ENSDART00000091044	17	13	13	AACCTCCTCTTGCTGTTGCGGTGCG	7	+	1547	3102
ENSDARG00000004377	ENSDART00000091044	17	14	14	CTCCTCCCACCGCTTCTGTGTCT	5	+	2252	3102
ENSDARG00000004377	ENSDART00000091044	17	14	14	TTCAACACCCTTGCAGGGGGTATTG	7	+	2080	3102
ENSDARG00000004377	ENSDART00000091044	17	14	14	TCCTCCTCCCACCGCTTCTGTGTCT	7	+	2250	3102
ENSDARG00000004377	ENSDART00000091044	17	16	16	GTAAAATTCCTGCTGGATTTTGGG	6	+	2650	3102
ENSDARG00000004377	ENSDART00000091044	17	17	17	GACGGCAGCAGACAAGTGTGAAGAG	7	+	2808	3102
ENSDARG00000004377	ENSDART00000091044	17	17	17	TGCCACTACTATCAGTGACGTGGAG	7	+	2784	3102
ENSDARG00000004377	ENSDART00000091044	17	18	18	TACCACGCAACTTGTTAGGGGTA	5	+	3053	3102
ENSDARG00000004377	ENSDART00000091044	17	18	18	GTACCACGCAACTTGTTAGGGGTA	6	+	3052	3102
ENSDARG00000004377	ENSDART00000105045	17	1	1	AGCGGCTGCCACCTCGCTGAAGTC	6	+	121	3087
ENSDARG00000004377	ENSDART00000105045	17	3	3	CAAGCCCTCCGAAAATGGGGTATGT	7	+	327	3087
ENSDARG00000004377	ENSDART00000105045	17	6	6	CGCAGCAGCTAGACGATCTGCGGCA	7	+	707	3087
ENSDARG00000004377	ENSDART00000105045	17	6	6	GCAGTCGGCCATGCTGAAGGTGGA	6	+	675	3087
ENSDARG00000004377	ENSDART00000105045	17	10	10	GTCCTATACATAATGCCTTGGCT	5	+	1175	3087
ENSDARG00000004377	ENSDART00000105045	17	12	12	CCCTCCTTCAGCAGTAATAGGGT	5	+	1315	3087
ENSDARG00000004377	ENSDART00000105045	17	13	13	CACAACAAATCCAACAGCGGATTAC	7	+	1427	3087
ENSDARG00000004377	ENSDART00000105045	17	13	13	GCCAAAAACTACTCCGGTAGCAGCA	7	+	1636	3087
ENSDARG00000004377	ENSDART00000105045	17	13	13	CAACAAATCCAACAGCGGATTAC	5	+	1429	3087
ENSDARG00000004377	ENSDART00000105045	17	13	13	AGAACCTCCTCTTGCTGTTGCGGTG	7	+	1506	3087
ENSDARG00000004377	ENSDART00000105045	17	13	13	AAAAACTACTCCGGTAGCAGCAGAA	7	+	1639	3087
ENSDARG00000004377	ENSDART00000105045	17	13	13	AAACTACTCCGGTAGCAGCAGAA	5	+	1641	3087
ENSDARG00000004377	ENSDART00000105045	17	13	13	AACCTCCTCTTGCTGTTGCGGTG	5	+	1508	3087
ENSDARG00000004377	ENSDART00000105045	17	13	13	AACCTCCTCTTGCTGTTGCGGTGCG	7	+	1508	3087
ENSDARG00000004377	ENSDART00000105045	17	14	14	CTCCTCCCACCGCTTCTGTGTCT	5	+	2177	3087
ENSDARG00000004377	ENSDART00000105045	17	14	14	TTCAACACCCTTGCAGGGGGTATTG	7	+	2005	3087
ENSDARG00000004377	ENSDART00000105045	17	14	14	TCCTCCTCCCACCGCTTCTGTGTCT	7	+	2175	3087
ENSDARG00000004377	ENSDART00000105045	17	15	15	AGAACCCCACTCCCCTGCAGAGGAA	7	+	2325	3087
ENSDARG00000004377	ENSDART00000105045	17	15	15	CCCCACTCCCCTGCAGAGGAAGAC	6	+	2329	3087
ENSDARG00000004377	ENSDART00000105045	17	15	15	ACCCCACTCCCCTGCAGAGGAAGAC	7	+	2328	3087
ENSDARG00000004377	ENSDART00000105045	17	15	15	GAACCCCACTCCCCTGCAGAGGAA	6	+	2326	3087
ENSDARG00000004377	ENSDART00000105045	17	18	18	GTAAAATTCCTGCTGGATTTTGGG	6	+	2635	3087
ENSDARG00000004377	ENSDART00000105045	17	19	19	GACGGCAGCAGACAAGTGTGAAGAG	7	+	2793	3087
ENSDARG00000004377	ENSDART00000105045	17	19	19	TGCCACTACTATCAGTGACGTGGAG	7	+	2769	3087
ENSDARG00000004377	ENSDART00000105045	17	20	20	GTACCACGCAACTTGTTAGGGGTA	6	+	3037	3087
ENSDARG00000004377	ENSDART00000105045	17	20	20	TACCACGCAACTTGTTAGGGGTA	5	+	3038	3087
ENSDARG00000004377	ENSDART00000105050	17	1	1	TCCAAAGGCAGGCCGTGGCTGCA	5	+	37	252
ENSDARG00000004377	ENSDART00000105050	17	1	1	GGCTGCAGAAGAGAGTGCGGGCGCA	7	+	53	252
ENSDARG00000004377	ENSDART00000105050	17	1	1	ACCTCCAAAGGCAGGCCGTGGCT	5	+	34	252
ENSDARG00000004377	ENSDART00000105050	17	2	2	AGCGGCTGCCACCTCGCTGAAGTC	6	+	217	252
ENSDARG00000004421	ENSDART00000002945	17	3	3	TCCCTATTCCAATTGACGATGGG	5	+	263	447
ENSDARG00000004576	ENSDART00000043866	17	5	1	AACAACAGCAGCAGCAGTCGGTTAC	7	+	217	2136
ENSDARG00000004576	ENSDART00000043866	17	5	1	ACCAACAACAGCAGCAGCAGTCGGT	7	+	214	2136
ENSDARG00000004576	ENSDART00000043866	17	5	1	GACTCCGGCAGCAGCGACGGAGGC	6	+	145	2136
ENSDARG00000004576	ENSDART00000043866	17	5	1	GCAACCAACAACAGCAGCAGCAGTC	7	+	211	2136
ENSDARG00000004576	ENSDART00000043866	17	5	1	GCAAGCAAAGACTCCGGCAGCAGCG	7	+	136	2136
ENSDARG00000004576	ENSDART00000043866	17	7	3	CAAAGCAAACACAGAGAAGAAGGA	6	+	981	2136
ENSDARG00000004576	ENSDART00000043866	17	9	5	ATCCTCATCTGCAGCTTTGATGAT	6	+	1264	2136
ENSDARG00000004576	ENSDART00000043866	17	9	5	GAAGACATCCTCATCTGCAGCTTTG	7	+	1258	2136
ENSDARG00000004576	ENSDART00000043866	17	10	6	GTACGCCACAAAGTTTGTGCAGCT	6	+	1317	2136
ENSDARG00000004576	ENSDART00000043866	17	10	6	TACGCCACAAAGTTTGTGCAGCT	5	+	1318	2136
ENSDARG00000004576	ENSDART00000043866	17	10	6	CTCCTAATCCAGACCTGGAGGTGTG	7	+	1409	2136
ENSDARG00000004576	ENSDART00000043866	17	10	6	CGCCACAAAGTTTGTGCAGCTGGT	6	+	1320	2136
ENSDARG00000004576	ENSDART00000043866	17	11	7	GGCTCAATCCTGAATGCAGACTCT	6	+	1535	2136
ENSDARG00000004576	ENSDART00000043866	17	12	8	CCCATCACCATCGGCAGGTGAGGCC	7	+	1657	2136
ENSDARG00000004576	ENSDART00000043866	17	13	9	TCCAGCGGCTGCAGCAGAGGTGGCT	7	+	1731	2136
ENSDARG00000004576	ENSDART00000043866	17	14	10	TGCCCAACATTGGATGGGCCTCT	5	+	1916	2136
ENSDARG00000004576	ENSDART00000043866	17	16	12	TCCCGCCGCCCGATGCTGAGGAG	5	+	2130	2136
ENSDARG00000004576	ENSDART00000043866	17	16	12	CAATCCCGCCGCCCGATGCTGAGGA	7	+	2127	2136
ENSDARG00000004576	ENSDART00000043866	17	16	12	CAATCCCGCCGCCCGATGCTGAG	5	+	2127	2136
ENSDARG00000004576	ENSDART00000103804	17	2	2	GTCTACAGAGCTAAATCTGTAAAC	6	+	73	837
ENSDARG00000004576	ENSDART00000103804	17	2	2	AAAGGCTCCTTTGCGTGTGTCTAC	6	+	55	837
ENSDARG00000004576	ENSDART00000103804	17	2	2	GTAAACACAGGATTGGAAGTGGCG	6	+	91	837
ENSDARG00000004576	ENSDART00000103804	17	3	3	GCACAAAGCTGGAATGGTGCAGAG	6	+	141	837
ENSDARG00000004576	ENSDART00000103804	17	4	4	GAAAAATCCTTTTACAGAGGAAGAG	7	+	309	837
ENSDARG00000004576	ENSDART00000103804	17	4	4	AGCCGCTACCTAAAGGAGAGGAA	5	+	289	837
ENSDARG00000004576	ENSDART00000103804	17	5	5	CGCACCCTCAATAAGGTGGTGCT	5	+	649	837
ENSDARG00000004576	ENSDART00000103804	17	5	5	AAACGCACCCTCAATAAGGTGGT	5	+	646	837
ENSDARG00000004736	ENSDART00000011676	17	3	3	TCCATCAAAGAACAGGGGGAGGTA	6	-	256	696
ENSDARG00000004736	ENSDART00000011676	17	3	3	TCCATCAAAGAACAGGGGGAGGT	5	-	257	696
ENSDARG00000004736	ENSDART00000011676	17	4	4	TGCTTCACCCACCATCTCTGCTGAA	7	-	465	696
ENSDARG00000004736	ENSDART00000011676	17	4	4	TGCTGCAAAACCTTCAGCGTGGTGC	7	-	431	696
ENSDARG00000004736	ENSDART00000011676	17	4	4	ACCTTCAGCGTGGTGCAGATGAC	5	-	424	696
ENSDARG00000004736	ENSDART00000011676	17	4	4	AAAACCTTCAGCGTGGTGCAGAT	5	-	427	696
ENSDARG00000004736	ENSDART00000011676	17	5	5	GGCGTCTTCACCCCCGTAGCGTTC	6	-	631	696
ENSDARG00000004861	ENSDART00000009104	17	1	1	CTCCTCAGACGCCAGCGGTAGCT	5	+	120	1305
ENSDARG00000004861	ENSDART00000009104	17	1	1	GACCGCCACATTGAGTCGAGTTG	5	+	22	1305
ENSDARG00000004861	ENSDART00000009104	17	2	2	GCCTGCCGCTTCATGAAGTGTCT	5	+	484	1305
ENSDARG00000004861	ENSDART00000009104	17	3	3	ACAAACGCCGGATAGATGCAGAA	5	+	569	1305
ENSDARG00000004861	ENSDART00000009104	17	3	3	TACAAACGCCGGATAGATGCAGAA	6	+	568	1305
ENSDARG00000004861	ENSDART00000009104	17	5	5	GTCTACCGCTCACTGTCTTTTGAG	6	+	880	1305
ENSDARG00000004861	ENSDART00000009104	17	5	5	GTCTTCTGCAGAGTGCGTGGATGGA	7	+	836	1305
ENSDARG00000004870	ENSDART00000033514	17	3	2	GCATACAGCTAAATGATGGGATGGA	7	+	38	1368
ENSDARG00000004870	ENSDART00000033514	17	3	2	CGCCCAGCCGTAATGAGGTGGAGCT	7	+	95	1368
ENSDARG00000004870	ENSDART00000033514	17	3	2	CGCCCAGCCGTAATGAGGTGGAG	5	+	95	1368
ENSDARG00000004870	ENSDART00000033514	17	3	2	CACCGCTCCGCCCCCGCAGGTGGT	6	+	135	1368
ENSDARG00000004870	ENSDART00000033514	17	3	2	GGCGCCGCCCAGCCGTAATGAGGT	6	+	90	1368
ENSDARG00000004870	ENSDART00000033514	17	3	2	AGCTCACTCTCAAATATGGGGCGAA	7	+	188	1368
ENSDARG00000004870	ENSDART00000033514	17	3	2	ACAAGCAGCACCGCGGCGCCGCC	5	+	76	1368
ENSDARG00000004870	ENSDART00000033514	17	5	4	TTCTCCTTAATTTATTTGGGGTG	5	+	505	1368
ENSDARG00000004870	ENSDART00000033514	17	5	4	TTCTCCTTAATTTATTTGGGGTGAG	7	+	505	1368
ENSDARG00000004870	ENSDART00000033514	17	6	5	TGCATCCACTGGAAGGGGCCGCT	5	+	610	1368
ENSDARG00000004870	ENSDART00000033514	17	7	6	GCCCTCTGCGAATCCTTGTGGAAAC	7	+	773	1368
ENSDARG00000004870	ENSDART00000033514	17	8	7	GTCAGCTACGATGGTGTGGCTCT	5	+	840	1368
ENSDARG00000004870	ENSDART00000033514	17	9	8	GGCGGCTTCACTCCGGCGTGGGT	5	+	970	1368
ENSDARG00000004870	ENSDART00000033514	17	9	8	GGCGGCTTCACTCCGGCGTGGGTG	6	+	970	1368
ENSDARG00000004870	ENSDART00000033514	17	9	8	GGCTCCCACAGCTCAGCCGGAGGA	6	+	942	1368
ENSDARG00000004870	ENSDART00000033514	17	9	8	TCCCACAGCTCAGCCGGAGGACGAT	7	+	945	1368
ENSDARG00000004870	ENSDART00000033514	17	9	8	GGCCACCACCACCAGCAGATGAT	5	+	1073	1368
ENSDARG00000004870	ENSDART00000033514	17	9	8	ACCACCACCAGCAGATGATGACGAA	7	+	1077	1368
ENSDARG00000004870	ENSDART00000033514	17	9	8	ACCACCAGCAGATGATGACGAAGAG	7	+	1080	1368
ENSDARG00000004870	ENSDART00000033514	17	9	8	AGCTCAGCCGGAGGACGATGGCGGC	7	+	951	1368
ENSDARG00000004870	ENSDART00000033514	17	9	8	CACCACCACCAGCAGATGATGAC	5	+	1076	1368
ENSDARG00000004870	ENSDART00000033514	17	9	8	GACCCATGCAGTCCACGGAGGAGAG	7	+	1016	1368
ENSDARG00000004870	ENSDART00000033514	17	9	8	GCAGACGACAGATCCAGGAGATGCC	7	+	1040	1368
ENSDARG00000004870	ENSDART00000033514	17	9	8	GCCACCACCACCAGCAGATGATGAC	7	+	1074	1368
ENSDARG00000004870	ENSDART00000033514	17	10	9	AGCTACAGCCAGCGGTGACTGGAAC	7	+	1167	1368
ENSDARG00000004870	ENSDART00000103641	17	1	1	AGCTCACTCTCAAATATGGGGCGAA	7	+	35	1110
ENSDARG00000004870	ENSDART00000103641	17	3	3	TTCTCCTTAATTTATTTGGGGTGAG	7	+	352	1110
ENSDARG00000004870	ENSDART00000103641	17	3	3	TTCTCCTTAATTTATTTGGGGTG	5	+	352	1110
ENSDARG00000004870	ENSDART00000103641	17	4	4	TGCATCCACTGGAAGGGGCCGCT	5	+	457	1110
ENSDARG00000004870	ENSDART00000103641	17	5	5	GCCCTCTGCGAATCCTTGTGGAAAC	7	+	620	1110
ENSDARG00000004870	ENSDART00000103641	17	6	6	GTCAGCTACGATGGTGTGGCTCT	5	+	687	1110
ENSDARG00000004870	ENSDART00000103641	17	7	7	CAATCCAACAACACAGTTGGGTTT	6	+	828	1110
ENSDARG00000004870	ENSDART00000103641	17	9	9	AGCTACAGCCAGCGGTGACTGGAAC	7	+	909	1110
ENSDARG00000004952	ENSDART00000019617	17	1	1	ACATCAAACCAACTTGGCTTTGCT	6	+	16	1077
ENSDARG00000004952	ENSDART00000019617	17	1	1	GACATCAAACCAACTTGGCTTTGCT	7	+	15	1077
ENSDARG00000004952	ENSDART00000019617	17	1	1	GTTCACAACTCCAAGCAGTGTAA	5	+	207	1077
ENSDARG00000004952	ENSDART00000019617	17	3	3	ATCAACACATACAATGTGGAAGAA	6	+	673	1077
ENSDARG00000004952	ENSDART00000019617	17	4	4	GTTTGCTAATTGAAGGTGAAAAC	5	+	752	1077
ENSDARG00000004952	ENSDART00000019617	17	6	6	TCCATCAAAGTCCATTCTGGATGT	6	+	960	1077
ENSDARG00000004952	ENSDART00000019617	17	6	6	ATCAAAGTCCATTCTGGATGTTGGT	7	+	963	1077
ENSDARG00000004952	ENSDART00000019617	17	6	6	GAAGCCATCAAGTTCAGCGGTTTTG	7	+	994	1077
ENSDARG00000004975	ENSDART00000067575	17	2	2	TTCCCACACTTACTTTAAGCTTAA	6	-	59	2523
ENSDARG00000004975	ENSDART00000067575	17	2	2	TTAAGCTTAAAAAAAAGCAGAAGCG	7	-	44	2523
ENSDARG00000004975	ENSDART00000067575	17	2	2	GAACTCAAATGAAGGTGCTGTCTCT	7	-	177	2523
ENSDARG00000004975	ENSDART00000067575	17	3	3	GAAGTCTGCCCGTTGCATTTGTC	5	-	418	2523
ENSDARG00000004975	ENSDART00000067575	17	4	4	CACAAATTCCCTCTTTATGGGCT	5	-	717	2523
ENSDARG00000004975	ENSDART00000067575	17	4	4	AAATGCAACAATAACTTTTGCAGTG	7	-	813	2523
ENSDARG00000004975	ENSDART00000067575	17	4	4	AGCCACAGCATAAACTGCGTTGTA	6	-	1180	2523
ENSDARG00000004975	ENSDART00000067575	17	4	4	TACTCAGACATTCACAGGAGGCTGC	7	-	532	2523
ENSDARG00000004975	ENSDART00000067575	17	4	4	GTCTACCACCTTTTTTAGTTTCT	5	-	776	2523
ENSDARG00000004975	ENSDART00000067575	17	4	4	GTAATCAAACTCTTTGAAGTTGTC	6	-	924	2523
ENSDARG00000004975	ENSDART00000067575	17	4	4	AGCCACAGCATAAACTGCGTTGTAG	7	-	1179	2523
ENSDARG00000004975	ENSDART00000067575	17	4	4	CTCCACACCAACTATTTGGAGGC	5	-	896	2523
ENSDARG00000004975	ENSDART00000067575	17	4	4	CACACCAACTATTTGGAGGCCTGT	6	-	892	2523
ENSDARG00000004975	ENSDART00000067575	17	4	4	CCCTCCACACCAACTATTTGGAGGC	7	-	896	2523
ENSDARG00000004975	ENSDART00000067575	17	4	4	CTCAGCACATTTAATGTTTTTGGA	6	-	948	2523
ENSDARG00000004975	ENSDART00000067575	17	4	4	CTCAGCACATTTAATGTTTTTGGAG	7	-	947	2523
ENSDARG00000004975	ENSDART00000067575	17	5	5	CACAACCTCATATTGGGCTAGTGT	6	-	1354	2523
ENSDARG00000004975	ENSDART00000067575	17	7	7	TACAGCACAAAATATAAGCATAC	5	-	2327	2523
ENSDARG00000004975	ENSDART00000067575	17	7	7	TTCCCAACATGTATTGCTTTGTA	5	-	2499	2523
ENSDARG00000005179	ENSDART00000003368	17	1	1	TACTCCGCAGAGCAGACGGAGAT	5	-	42	1863
ENSDARG00000005179	ENSDART00000003368	17	1	1	ACCTGCTGCGATACCGGAGGTGTTC	7	-	93	1863
ENSDARG00000005179	ENSDART00000003368	17	1	1	ACCTGCTGCGATACCGGAGGTGTT	6	-	94	1863
ENSDARG00000005179	ENSDART00000003368	17	3	3	AAAGCCAAAACTACAGCCGAGGTA	6	-	373	1863
ENSDARG00000005179	ENSDART00000003368	17	3	3	AGCCAAAACTACAGCCGAGGTAGAA	7	-	370	1863
ENSDARG00000005179	ENSDART00000003368	17	7	7	CTCCACAGCATCCTGCATGATGT	5	-	1181	1863
ENSDARG00000005179	ENSDART00000003368	17	7	7	TTCTCCACAGCATCCTGCATGATGT	7	-	1181	1863
ENSDARG00000005179	ENSDART00000003368	17	9	9	GCCATCTGCTGCCCGGCCGCTGCG	6	-	1333	1863
ENSDARG00000005179	ENSDART00000003368	17	9	9	GTTCACTCCTCTCATGTTGTAGTA	6	-	1360	1863
ENSDARG00000005179	ENSDART00000003368	17	11	11	TTCAGCCCACTTGCTCTGTTGTT	5	-	1688	1863
ENSDARG00000005179	ENSDART00000003368	17	11	11	ACAGACCCAAACCCCTCTGGAGGT	6	-	1652	1863
ENSDARG00000005179	ENSDART00000062067	17	1	1	TACTCCGCAGAGCAGACGGAGAT	5	-	42	1866
ENSDARG00000005179	ENSDART00000062067	17	1	1	ACCTGCTGCGATACCGGAGGTGTT	6	-	94	1866
ENSDARG00000005179	ENSDART00000062067	17	1	1	ACCTGCTGCGATACCGGAGGTGTTC	7	-	93	1866
ENSDARG00000005179	ENSDART00000062067	17	3	3	AGCCAAAACTACAGCCGAGGTAGAA	7	-	370	1866
ENSDARG00000005179	ENSDART00000062067	17	3	3	AAAGCCAAAACTACAGCCGAGGTA	6	-	373	1866
ENSDARG00000005179	ENSDART00000062067	17	7	7	TTCTCCACAGCATCCTGCATGATGT	7	-	1181	1866
ENSDARG00000005179	ENSDART00000062067	17	7	7	CTCCACAGCATCCTGCATGATGT	5	-	1181	1866
ENSDARG00000005179	ENSDART00000062067	17	12	12	GCCATCTGCTGCCCGGCCGCTGCG	6	-	1336	1866
ENSDARG00000005179	ENSDART00000062067	17	12	12	GTTCACTCCTCTCATGTTGTAGTA	6	-	1363	1866
ENSDARG00000005179	ENSDART00000062067	17	14	14	ACAGACCCAAACCCCTCTGGAGGT	6	-	1655	1866
ENSDARG00000005179	ENSDART00000062067	17	14	14	TTCAGCCCACTTGCTCTGTTGTT	5	-	1691	1866
ENSDARG00000005232	ENSDART00000018773	17	1	1	ACAGACGTCTCGAGGGATGATTT	5	+	25	1173
ENSDARG00000005232	ENSDART00000018773	17	1	1	AGCAAAAACTGAAAGAGCTGGAGAG	7	+	374	1173
ENSDARG00000005232	ENSDART00000018773	17	1	1	TTCTGCCACTGTCAGGGATGTTGGG	7	+	531	1173
ENSDARG00000005232	ENSDART00000018773	17	1	1	TGCATCTGCACGAAATAAGGAGCT	6	+	188	1173
ENSDARG00000005232	ENSDART00000018773	17	3	3	CTCCGCAGCAGGGCAGTGTAGGAG	6	+	788	1173
ENSDARG00000005232	ENSDART00000018773	17	4	4	TGCAGCACAGAAACCTGAGGCTGTT	7	+	957	1173
ENSDARG00000005232	ENSDART00000018773	17	6	6	TCCGCCAACATCTTTCTGGAAAC	5	+	1142	1173
ENSDARG00000005232	ENSDART00000104998	17	1	1	TTCTGCCACTGTCAGGGATGTTGGG	7	+	501	1182
ENSDARG00000005232	ENSDART00000104998	17	1	1	TGCATCTGCACGAAATAAGGAGCT	6	+	158	1182
ENSDARG00000005232	ENSDART00000104998	17	1	1	AGCAAAAACTGAAAGAGCTGGAGAG	7	+	344	1182
ENSDARG00000005232	ENSDART00000104998	17	4	4	CTCCGCAGCAGGGCAGTGTAGGAG	6	+	797	1182
ENSDARG00000005232	ENSDART00000104998	17	4	4	TTCTCCGCAGCAGGGCAGTGTAG	5	+	795	1182
ENSDARG00000005232	ENSDART00000104998	17	5	5	TGCAGCACAGAAACCTGAGGCTGTT	7	+	966	1182
ENSDARG00000005232	ENSDART00000104998	17	7	7	TCCGCCAACATCTTTCTGGAAAC	5	+	1151	1182
ENSDARG00000005232	ENSDART00000104999	17	1	1	ACAGACGTCTCGAGGGATGATTT	5	+	25	1209
ENSDARG00000005232	ENSDART00000104999	17	1	1	AGCAAAAACTGAAAGAGCTGGAGAG	7	+	374	1209
ENSDARG00000005232	ENSDART00000104999	17	1	1	TTCTGCCACTGTCAGGGATGTTGGG	7	+	531	1209
ENSDARG00000005232	ENSDART00000104999	17	1	1	TGCATCTGCACGAAATAAGGAGCT	6	+	188	1209
ENSDARG00000005232	ENSDART00000104999	17	5	5	CTCCGCAGCAGGGCAGTGTAGGAG	6	+	824	1209
ENSDARG00000005232	ENSDART00000104999	17	6	6	TGCAGCACAGAAACCTGAGGCTGTT	7	+	993	1209
ENSDARG00000005232	ENSDART00000104999	17	8	8	TCCGCCAACATCTTTCTGGAAAC	5	+	1178	1209
ENSDARG00000005271	ENSDART00000020336	17	1	1	TCCTCAACCTGCAGATGAAGGTGGA	7	+	8	1680
ENSDARG00000005271	ENSDART00000020336	17	1	1	CTCCTCAACCTGCAGATGAAGGT	5	+	7	1680
ENSDARG00000005271	ENSDART00000020336	17	1	1	GACCTCCTCAACCTGCAGATGAA	5	+	4	1680
ENSDARG00000005271	ENSDART00000020336	17	1	1	ACCTGCAGATGAAGGTGGACTTC	5	+	14	1680
ENSDARG00000005271	ENSDART00000020336	17	3	3	TACACCTTCACGACGCGTCGGAGGA	7	+	495	1680
ENSDARG00000005271	ENSDART00000020336	17	4	4	AGCGTCAACTCTGTCCGTATGGTAA	7	+	770	1680
ENSDARG00000005271	ENSDART00000020336	17	5	5	GCAATCCCAGAGTTTTGATGAGTTG	7	+	1215	1680
ENSDARG00000005271	ENSDART00000020336	17	5	5	CACAGCAGCTGGCTGCAGAAGTT	5	+	1637	1680
ENSDARG00000005271	ENSDART00000020336	17	5	5	AGATGCACAGCAGCTGGCTGCAGAA	7	+	1632	1680
ENSDARG00000005271	ENSDART00000020336	17	5	5	ACAGTCTTCCTGCTTGTGGTGGCT	6	+	1391	1680
ENSDARG00000005271	ENSDART00000020336	17	5	5	ACAGTCTTCCTGCTTGTGGTGGC	5	+	1391	1680
ENSDARG00000005271	ENSDART00000020336	17	5	5	AAACTCAAATCCAGCGGAGAGTTC	6	+	1663	1680
ENSDARG00000005271	ENSDART00000038774	17	1	1	TCCTCAACCTGCAGATGAAGGTGGA	7	+	8	954
ENSDARG00000005271	ENSDART00000038774	17	1	1	GACCTCCTCAACCTGCAGATGAA	5	+	4	954
ENSDARG00000005271	ENSDART00000038774	17	1	1	CTCCTCAACCTGCAGATGAAGGT	5	+	7	954
ENSDARG00000005271	ENSDART00000038774	17	1	1	ACCTGCAGATGAAGGTGGACTTC	5	+	14	954
ENSDARG00000005271	ENSDART00000038774	17	3	3	TACACCTTCACGACGCGTCGGAGGA	7	+	495	954
ENSDARG00000005271	ENSDART00000038774	17	4	4	AGCGTCAACTCTGTCCGTATGGTAA	7	+	770	954
ENSDARG00000005271	ENSDART00000061720	17	1	1	TCCTCAACCTGCAGATGAAGGTGGA	7	+	2	1674
ENSDARG00000005271	ENSDART00000061720	17	1	1	CTCCTCAACCTGCAGATGAAGGT	5	+	1	1674
ENSDARG00000005271	ENSDART00000061720	17	1	1	ACCTGCAGATGAAGGTGGACTTC	5	+	8	1674
ENSDARG00000005271	ENSDART00000061720	17	3	3	TACACCTTCACGACGCGTCGGAGGA	7	+	489	1674
ENSDARG00000005271	ENSDART00000061720	17	4	4	AGCGTCAACTCTGTCCGTATGGTAA	7	+	764	1674
ENSDARG00000005271	ENSDART00000061720	17	5	5	AGATGCACAGCAGCTGGCTGCAGAA	7	+	1626	1674
ENSDARG00000005271	ENSDART00000061720	17	5	5	CACAGCAGCTGGCTGCAGAAGTT	5	+	1631	1674
ENSDARG00000005271	ENSDART00000061720	17	5	5	ACAGTCTTCCTGCTTGTGGTGGCT	6	+	1385	1674
ENSDARG00000005271	ENSDART00000061720	17	5	5	GCAATCCCAGAGTTTTGATGAGTTG	7	+	1209	1674
ENSDARG00000005271	ENSDART00000061720	17	5	5	ACAGTCTTCCTGCTTGTGGTGGC	5	+	1385	1674
ENSDARG00000005271	ENSDART00000061720	17	5	5	AAACTCAAATCCAGCGGAGAGTTC	6	+	1657	1674
ENSDARG00000005356	ENSDART00000040431	17	4	4	CCCTCCAGAGCCTGTGGAGGTGCT	6	+	435	2610
ENSDARG00000005356	ENSDART00000040431	17	7	7	TCCCCCTTCTCTCCCTGGGTGGAC	6	+	865	2610
ENSDARG00000005356	ENSDART00000040431	17	8	8	AGCTCACTCTGTCCTGGGCGACGCT	7	+	962	2610
ENSDARG00000005356	ENSDART00000040431	17	9	9	GCCACCTTCCAGGTTGCAGCGTGC	6	+	1117	2610
ENSDARG00000005356	ENSDART00000040431	17	9	9	AACGCCACCTTCCAGGTTGCAGCG	6	+	1114	2610
ENSDARG00000005356	ENSDART00000040431	17	11	11	GCATTCGCAGCTCAAGGAGCGGAA	6	+	1327	2610
ENSDARG00000005356	ENSDART00000040431	17	13	13	GAACAACTCTGGGCAGAAGGTTGC	6	+	1554	2610
ENSDARG00000005356	ENSDART00000040431	17	16	16	ACATCATCCATCGGGATTTGGCTGC	7	+	1883	2610
ENSDARG00000005356	ENSDART00000040431	17	16	16	AACATCATCCATCGGGATTTGGC	5	+	1882	2610
ENSDARG00000005356	ENSDART00000040431	17	16	16	AACATCATCCATCGGGATTTGGCT	6	+	1882	2610
ENSDARG00000005356	ENSDART00000040431	17	16	16	ACATCATCCATCGGGATTTGGCT	5	+	1883	2610
ENSDARG00000005356	ENSDART00000040431	17	17	17	ACACAACACAGAGTGATGTGGTA	5	+	2060	2610
ENSDARG00000005356	ENSDART00000040431	17	17	17	CTACACAACACAGAGTGATGTGGTA	7	+	2058	2610
ENSDARG00000005356	ENSDART00000040431	17	17	17	GTCTACACAACACAGAGTGATGT	5	+	2056	2610
ENSDARG00000005356	ENSDART00000040431	17	18	18	AACACCTTACCCAGGAGTGGAGAAC	7	+	2124	2610
ENSDARG00000005574	ENSDART00000019844	17	1	1	TCCAGCCGCTCAGCAGGACGGTGGG	7	+	374	1272
ENSDARG00000005574	ENSDART00000019844	17	1	1	GAACAAATCAAAATCGCTGTGTGC	6	+	48	1272
ENSDARG00000005574	ENSDART00000019844	17	1	1	CGCTCAGCAGGACGGTGGGGCCGCT	7	+	380	1272
ENSDARG00000005574	ENSDART00000019844	17	1	1	ACAGTCAGCCCGCGTTTCTGGAGGT	7	+	323	1272
ENSDARG00000005574	ENSDART00000019844	17	4	4	CTCCTCCCCGTCAGCTCTGCTGGC	6	+	645	1272
ENSDARG00000005574	ENSDART00000019844	17	6	6	TCCCAAACCGGACGAGGCCGAGGCT	7	+	1053	1272
ENSDARG00000005574	ENSDART00000019844	17	6	6	CACAGCGCCAAAGTGCTTGGAAC	5	+	1162	1272
ENSDARG00000005574	ENSDART00000019844	17	6	6	GTCCAAAGAGGAACTGAGGGAGAA	6	+	1104	1272
ENSDARG00000005574	ENSDART00000019844	17	6	6	GACCAATCCCAAACCGGACGAGGCC	7	+	1047	1272
ENSDARG00000005574	ENSDART00000019844	17	6	6	ATCCCAAACCGGACGAGGCCGAG	5	+	1052	1272
ENSDARG00000005574	ENSDART00000030448	17	1	1	TCCAGCCGCTCAGCAGGACGGTGGG	7	+	374	1116
ENSDARG00000005574	ENSDART00000030448	17	1	1	GAACAAATCAAAATCGCTGTGTGC	6	+	48	1116
ENSDARG00000005574	ENSDART00000030448	17	1	1	CGCTCAGCAGGACGGTGGGGCCGCT	7	+	380	1116
ENSDARG00000005574	ENSDART00000030448	17	1	1	ACAGTCAGCCCGCGTTTCTGGAGGT	7	+	323	1116
ENSDARG00000005574	ENSDART00000030448	17	5	5	CACAGCGCCAAAGTGCTTGGAAC	5	+	1006	1116
ENSDARG00000005574	ENSDART00000030448	17	5	5	ATCCCAAACCGGACGAGGCCGAG	5	+	896	1116
ENSDARG00000005574	ENSDART00000030448	17	5	5	GACCAATCCCAAACCGGACGAGGCC	7	+	891	1116
ENSDARG00000005574	ENSDART00000030448	17	5	5	GTCCAAAGAGGAACTGAGGGAGAA	6	+	948	1116
ENSDARG00000005574	ENSDART00000030448	17	5	5	TCCCAAACCGGACGAGGCCGAGGCT	7	+	897	1116
ENSDARG00000005574	ENSDART00000104327	17	1	1	GAACAAATCAAAATCGCTGTGTGC	6	+	48	1110
ENSDARG00000005574	ENSDART00000104327	17	3	3	CGCTCAGCAGGACGGTGGGGCCGCT	7	+	371	1110
ENSDARG00000005574	ENSDART00000104327	17	3	3	TCCAGCCGCTCAGCAGGACGGTGGG	7	+	365	1110
ENSDARG00000005574	ENSDART00000104327	17	3	3	ACAGTCAGCCCGCGTTTCTGGAGGT	7	+	314	1110
ENSDARG00000005574	ENSDART00000104327	17	7	7	TCCCAAACCGGACGAGGCCGAGGCT	7	+	891	1110
ENSDARG00000005574	ENSDART00000104327	17	7	7	GTCCAAAGAGGAACTGAGGGAGAA	6	+	942	1110
ENSDARG00000005574	ENSDART00000104327	17	7	7	GACCAATCCCAAACCGGACGAGGCC	7	+	885	1110
ENSDARG00000005574	ENSDART00000104327	17	7	7	GAATACCCACCATTCTTTGCAGGG	6	+	793	1110
ENSDARG00000005574	ENSDART00000104327	17	7	7	CACAGCGCCAAAGTGCTTGGAAC	5	+	1000	1110
ENSDARG00000005574	ENSDART00000104327	17	7	7	ATCCCAAACCGGACGAGGCCGAG	5	+	890	1110
ENSDARG00000005627	ENSDART00000002562	17	1	1	CACAGCTTCCCATCGCTGGCGGT	5	-	55	1740
ENSDARG00000005627	ENSDART00000002562	17	1	1	AGCTTCCCATCGCTGGCGGTGTCT	6	-	51	1740
ENSDARG00000005627	ENSDART00000002562	17	1	1	AGCTTCCCATCGCTGGCGGTGTC	5	-	52	1740
ENSDARG00000005627	ENSDART00000002562	17	1	1	ACCACCGGCTGCTGGATCTGCTGGA	7	-	104	1740
ENSDARG00000005627	ENSDART00000002562	17	2	2	TCCAGCAGCAGCAGGGTGGTCTCT	6	-	288	1740
ENSDARG00000005627	ENSDART00000002562	17	3	3	AGAACCGCCAGACTGAAGATGAT	5	-	361	1740
ENSDARG00000005627	ENSDART00000002562	17	3	3	ACCGCCAGACTGAAGATGATGGT	5	-	358	1740
ENSDARG00000005627	ENSDART00000002562	17	4	4	TCCCGCACCGCCCAGATGAAGCT	5	-	535	1740
ENSDARG00000005627	ENSDART00000002562	17	4	4	ATCTACAGCTTCATCAGGGGATTTG	7	-	483	1740
ENSDARG00000005627	ENSDART00000002562	17	4	4	TACAGCTTCATCAGGGGATTTGAC	6	-	481	1740
ENSDARG00000005627	ENSDART00000002562	17	6	6	GGCACCGCCCCGCTGGAGATGGT	5	-	913	1740
ENSDARG00000005627	ENSDART00000002562	17	6	6	TCCAGCTCCAGAGGGAAGGCTCT	5	-	1036	1740
ENSDARG00000005627	ENSDART00000002562	17	6	6	CACGGCACCGCCCCGCTGGAGAT	5	-	916	1740
ENSDARG00000005627	ENSDART00000002562	17	6	6	CACCGCCCCGCTGGAGATGGTGTT	6	-	910	1740
ENSDARG00000005627	ENSDART00000002562	17	7	7	GTAGCCTCCGCTCCTGGCGTAGAA	6	-	1282	1740
ENSDARG00000005627	ENSDART00000002562	17	7	7	GTAGCCTCCGCTCCTGGCGTAGAAC	7	-	1281	1740
ENSDARG00000005627	ENSDART00000002562	17	7	7	AGCCTCCGCTCCTGGCGTAGAAC	5	-	1281	1740
ENSDARG00000005627	ENSDART00000002562	17	10	10	TCCATCTGCTGCTCCAGCTGCAGCC	7	-	1538	1740
ENSDARG00000005627	ENSDART00000002562	17	10	10	TGCTGCTCCAGCTGCAGCCGCGTCT	7	-	1532	1740
ENSDARG00000005627	ENSDART00000002562	17	10	10	CGCTCACGCTCCTCTGCCGATGCA	6	-	1470	1740
ENSDARG00000005627	ENSDART00000002562	17	10	10	CCCTGCTCCAGCAGATGCGCCTGC	6	-	1677	1740
ENSDARG00000005627	ENSDART00000002562	17	10	10	ATCTGCTGCTCCAGCTGCAGCCGCG	7	-	1535	1740
ENSDARG00000005650	ENSDART00000025728	17	1	1	CGCTGCTCCAGTCTGTGAAGACGTA	7	-	18	1335
ENSDARG00000005650	ENSDART00000025728	17	1	1	CGCTGCTCCAGTCTGTGAAGCATGC	7	-	78	1335
ENSDARG00000005650	ENSDART00000025728	17	2	2	CGCTCCTCCAGTCTGTGAAGACGGA	7	-	594	1335
ENSDARG00000005650	ENSDART00000025728	17	2	2	CGCTGCTCCAGTCTGTGAAGACGGA	7	-	684	1335
ENSDARG00000005650	ENSDART00000025728	17	2	2	GTTCCAGTCTGTGAAGCGTGATTG	6	-	621	1335
ENSDARG00000005650	ENSDART00000025728	17	3	3	GGCCGCAGCTTCAGTCTGTGAAGCG	7	-	960	1335
ENSDARG00000005827	ENSDART00000006058	17	2	1	AAAATCATCCCCTCGATGTTGTT	5	-	127	945
ENSDARG00000005827	ENSDART00000006058	17	2	1	AAATCATCCCCTCGATGTTGTTGTA	7	-	124	945
ENSDARG00000005827	ENSDART00000006058	17	2	1	ATCATCCCCTCGATGTTGTTGTA	5	-	124	945
ENSDARG00000005827	ENSDART00000006058	17	2	1	CACTACATCCTCCACCTCTGGAAAC	7	-	45	945
ENSDARG00000005827	ENSDART00000006058	17	4	3	TCCAGCTGCTCATCTTTGGTGTA	5	-	370	945
ENSDARG00000005827	ENSDART00000006058	17	4	3	CTCTCCAGCTGCTCATCTTTGGTG	6	-	372	945
ENSDARG00000005827	ENSDART00000006058	17	6	5	ACCTCCATCTGAATGTTGAAGAC	5	-	811	945
ENSDARG00000005827	ENSDART00000006058	17	7	6	ATCTCCATCCACCTCAGCATTTTCT	7	-	894	945
ENSDARG00000005861	ENSDART00000084745	17	1	1	AGCTCCAGCTTTCTTGAAGATGAA	6	+	93	3096
ENSDARG00000005861	ENSDART00000084745	17	2	2	GACTCAAGACGTGAGCATGAGCA	5	+	231	3096
ENSDARG00000005861	ENSDART00000084745	17	3	3	GACATCAGCATTATCGCCGGTGGC	6	+	334	3096
ENSDARG00000005861	ENSDART00000084745	17	6	6	GGCTTCACCATGCTAGTGGGAGAC	6	+	826	3096
ENSDARG00000005861	ENSDART00000084745	17	6	6	CAACACAGACTCCTTTGAGGTAGTG	7	+	876	3096
ENSDARG00000005861	ENSDART00000084745	17	6	6	CTCAACACAGACTCCTTTGAGGTA	6	+	874	3096
ENSDARG00000005861	ENSDART00000084745	17	12	12	CTCGACTACATTTACAGGGTGAGTA	7	+	1492	3096
ENSDARG00000005861	ENSDART00000084745	17	13	13	CACAACGCCATGGGAGATTTTGGA	6	+	1648	3096
ENSDARG00000005861	ENSDART00000084745	17	13	13	GAAATCTCCTCACTGTGGCTGAA	5	+	1670	3096
ENSDARG00000005861	ENSDART00000084745	17	13	13	ACACAACGCCATGGGAGATTTTGGA	7	+	1647	3096
ENSDARG00000005861	ENSDART00000084745	17	14	14	GTCTTCAGAGCTCTCATCTGAGGTC	7	+	1845	3096
ENSDARG00000005861	ENSDART00000084745	17	14	14	TTCAAAAGCCCCAATCTGCAGCT	5	+	1870	3096
ENSDARG00000005861	ENSDART00000084745	17	14	14	GTTCTCTTCCGCACTTTAGATGGC	6	+	2047	3096
ENSDARG00000005861	ENSDART00000084745	17	14	14	GCCACCATCCTCTGAGTGGCGGCC	6	+	1769	3096
ENSDARG00000005861	ENSDART00000084745	17	14	14	CACGACAACCCCTATGTAGAGTCT	6	+	1825	3096
ENSDARG00000005861	ENSDART00000084745	17	14	14	TACCCCTAACTGCTCGCATGGTAA	6	+	1721	3096
ENSDARG00000005861	ENSDART00000084745	17	15	15	GTCAAAACAGGAGGAAGAGGAGTTG	7	+	2304	3096
ENSDARG00000005861	ENSDART00000084745	17	15	15	TTCATCAGAGCTGGACGTGGAAGAT	7	+	2124	3096
ENSDARG00000005861	ENSDART00000084745	17	15	15	ACAGTCAAAACAGGAGGAAGAGGAG	7	+	2301	3096
ENSDARG00000005861	ENSDART00000084745	17	17	17	AGACACACAAGATAGCAGTCTTC	5	+	2540	3096
ENSDARG00000005861	ENSDART00000084745	17	17	17	AGAGACACACAAGATAGCAGTCTTC	7	+	2538	3096
ENSDARG00000005861	ENSDART00000084745	17	17	17	GCAGTCTTCTATATTGGAGAAGGA	6	+	2554	3096
ENSDARG00000005861	ENSDART00000084745	17	18	18	TTACGCTACCTCCAATGTGGAGGTC	7	+	2733	3096
ENSDARG00000005861	ENSDART00000084745	17	18	18	TTACGCTACCTCCAATGTGGAGGT	6	+	2733	3096
ENSDARG00000005861	ENSDART00000084745	17	19	19	GAATCATCCCCACCGACTTTGGA	5	+	2882	3096
ENSDARG00000005861	ENSDART00000084745	17	19	19	ATCATCCCCACCGACTTTGGAGAT	6	+	2884	3096
ENSDARG00000005861	ENSDART00000084745	17	19	19	ATCCCCACCGACTTTGGAGATGTC	6	+	2887	3096
ENSDARG00000005861	ENSDART00000084745	17	20	20	GTCTGCCACTCTACCAGAGTTTGTA	7	+	3080	3096
ENSDARG00000006212	ENSDART00000047089	17	1	1	ACCCACAAAATAGAGGAGATGCA	5	+	151	1497
ENSDARG00000006212	ENSDART00000047089	17	4	4	GACAAAGCCCGTCCATGGAGAAGGA	7	+	476	1497
ENSDARG00000006212	ENSDART00000047089	17	4	4	CAACTCTTCGAACAGCGCAGAAGAG	7	+	621	1497
ENSDARG00000006212	ENSDART00000047089	17	4	4	AACAGCGCAGAAGAGGACGAGGAG	6	+	631	1497
ENSDARG00000006212	ENSDART00000047089	17	5	5	GTCTTCGCAACCAGTGCTTTGAC	5	+	923	1497
ENSDARG00000006212	ENSDART00000047089	17	7	7	CACCTCAGACCGCTCGGAGGATGTT	7	+	1242	1497
ENSDARG00000006212	ENSDART00000047089	17	7	7	CACCTCAGACCGCTCGGAGGATGT	6	+	1242	1497
ENSDARG00000006212	ENSDART00000047089	17	7	7	ATCAGCATCAGAGTTCTGAGGAG	5	+	1076	1497
ENSDARG00000006212	ENSDART00000047089	17	7	7	AGCATCAGAGTTCTGAGGAGTGT	5	+	1079	1497
ENSDARG00000006212	ENSDART00000047089	17	7	7	AGAGACCCAACAGCAGCAGCAGCA	6	+	1053	1497
ENSDARG00000006212	ENSDART00000047089	17	7	7	ACCTCAGACCGCTCGGAGGATGTT	6	+	1243	1497
ENSDARG00000006212	ENSDART00000047089	17	7	7	ACCTCAGACCGCTCGGAGGATGT	5	+	1243	1497
ENSDARG00000006235	ENSDART00000003418	17	9	9	TCCGTCCTCTGAGCGGGCGTTGTGT	7	-	768	975
ENSDARG00000006235	ENSDART00000003418	17	9	9	TCCGTCCTCTGAGCGGGCGTTGTG	6	-	769	975
ENSDARG00000006272	ENSDART00000014306	17	2	1	ACACCCACCTAGTAAAGCTGGTGGT	7	-	441	2109
ENSDARG00000006272	ENSDART00000014306	17	2	1	CTCCTCCTCTCGTCTTCTGCGGTC	6	-	271	2109
ENSDARG00000006272	ENSDART00000014306	17	2	1	CGCTGCGTCTGACGGGCAGGGTGC	6	-	215	2109
ENSDARG00000006272	ENSDART00000014306	17	2	1	TCCACCGCCATCTCCCTGTGCCTCT	7	-	167	2109
ENSDARG00000006272	ENSDART00000014306	17	2	1	GCACCCAGCTCACTTGGGCAGTC	5	-	190	2109
ENSDARG00000006272	ENSDART00000014306	17	3	2	CTCCACGTCCTCTTGACTTTGAG	5	-	512	2109
ENSDARG00000006272	ENSDART00000014306	17	4	3	CACACCTGCATGTGGGACGTTGAG	6	-	726	2109
ENSDARG00000006272	ENSDART00000014306	17	4	3	AGACACACCTGCATGTGGGACGTT	6	-	729	2109
ENSDARG00000006272	ENSDART00000014306	17	5	4	CTCTCCTCCCCACTGGGTGAGAG	5	-	827	2109
ENSDARG00000006272	ENSDART00000014306	17	6	5	GCAGGCCGCTGCGTTCTGCCGCC	5	-	954	2109
ENSDARG00000006272	ENSDART00000014306	17	6	5	CTCGTCTCCTTCGTGTAGCAGGC	5	-	971	2109
ENSDARG00000006272	ENSDART00000014306	17	7	6	CTCACCACAGTCTCTTTAATAGGAG	7	-	1115	2109
ENSDARG00000006272	ENSDART00000014306	17	8	7	GCCTGCCACCAGTTGGGGTCGTC	5	-	1246	2109
ENSDARG00000006272	ENSDART00000014306	17	8	7	GTCTTCATCCCCATCTCTGTAGGC	6	-	1267	2109
ENSDARG00000006272	ENSDART00000014306	17	10	9	CTCACCATCATTTTTGTTAGCATTG	7	-	1443	2109
ENSDARG00000006272	ENSDART00000014306	17	11	10	TCCTCATTATCAAAGTCTGTAGAT	6	-	1455	2109
ENSDARG00000006272	ENSDART00000014306	17	11	10	GGCCGCTTACGATTGGCTGGTTG	5	-	1513	2109
ENSDARG00000006272	ENSDART00000014306	17	12	11	GTACGCACAGGAGGCAGATTTTGCC	7	-	1801	2109
ENSDARG00000006272	ENSDART00000014306	17	12	11	CACGTCGACTCCGTGTGGTGTCT	5	-	1629	2109
ENSDARG00000006272	ENSDART00000014306	17	13	12	CTCTCAATCGCTCTTGGGATGGA	5	-	1890	2109
ENSDARG00000006272	ENSDART00000014306	17	14	13	AGACGCAGCAGCTCCTGGTAGGAT	6	-	2043	2109
ENSDARG00000006272	ENSDART00000014306	17	14	13	AGCATCAAACAGGTGGCCGTAGTT	6	-	1993	2109
ENSDARG00000006272	ENSDART00000014306	17	14	13	CGCAGCAGCTCCTGGTAGGATTT	5	-	2041	2109
ENSDARG00000006272	ENSDART00000014306	17	14	13	GGCAGCATCAAACAGGTGGCCGTA	6	-	1996	2109
ENSDARG00000006272	ENSDART00000014306	17	14	13	CTCAGCGCAGCCAGGATGAAGGG	5	-	2100	2109
ENSDARG00000006272	ENSDART00000014306	17	14	13	GCATCAAACAGGTGGCCGTAGTT	5	-	1993	2109
ENSDARG00000006279	ENSDART00000027667	17	1	1	GTCAGCTTCCAGATCTGGGACTTT	6	+	175	978
ENSDARG00000006279	ENSDART00000027667	17	2	2	CCCAGCAGACACACATGTAGACGTA	7	+	273	978
ENSDARG00000006279	ENSDART00000027667	17	5	5	ACATGCAGACCTATGAGTTGTGC	5	+	692	978
ENSDARG00000006288	ENSDART00000022218	17	2	2	CCCACCTCCCACATCAGCCGCGGGT	7	-	167	1548
ENSDARG00000006288	ENSDART00000022218	17	2	2	CACCTCCCACATCAGCCGCGGGT	5	-	167	1548
ENSDARG00000006288	ENSDART00000022218	17	3	3	TTCTTCTGCTCCTGTGAAGGGGCC	6	-	270	1548
ENSDARG00000006288	ENSDART00000022218	17	4	4	GTTCTCGTCTTCATCTTTGATGTC	6	-	427	1548
ENSDARG00000006288	ENSDART00000022218	17	5	5	GTCTTCAGCACTTCCTCTGTTGTG	6	-	577	1548
ENSDARG00000006288	ENSDART00000022218	17	5	5	CACGTCTTCACTGGGGAAGCTGCT	6	-	529	1548
ENSDARG00000006288	ENSDART00000022218	17	5	5	CACTTCCTCTGTTGTGGAGGCTCT	6	-	569	1548
ENSDARG00000006288	ENSDART00000022218	17	7	7	CTCTCCGCCTTACAGATGAAGCG	5	-	796	1548
ENSDARG00000006288	ENSDART00000022218	17	7	7	TTACACGCCTCTTTATGCTGCAGGA	7	-	761	1548
ENSDARG00000006288	ENSDART00000022218	17	7	7	ACACGCCTCTTTATGCTGCAGGA	5	-	761	1548
ENSDARG00000006288	ENSDART00000022218	17	7	7	TCCGCCTTACAGATGAAGCGTTC	5	-	793	1548
ENSDARG00000006288	ENSDART00000022218	17	8	8	TGCTCCTGCAGGTTGAGTGAGGA	5	-	931	1548
ENSDARG00000006288	ENSDART00000022218	17	8	8	CACTTCTTATTACAGATGGTGCA	5	-	904	1548
ENSDARG00000006288	ENSDART00000022218	17	9	9	CTCTTCAGCTGATTGGTGGAGAT	5	-	1003	1548
ENSDARG00000006288	ENSDART00000022218	17	10	10	AGACGCTTAAAGCTGCGGCTGCA	5	-	1072	1548
ENSDARG00000006288	ENSDART00000022218	17	11	11	AAAGGCCTCTCCTCTGAATGAGTC	6	-	1203	1548
ENSDARG00000006288	ENSDART00000022218	17	13	13	TTCTCCTTCTCTCCTGTGTGGGTCT	7	-	1457	1548
ENSDARG00000006288	ENSDART00000022218	17	13	13	TTCTCCTTCTCTCCTGTGTGGGTC	6	-	1458	1548
ENSDARG00000006288	ENSDART00000022218	17	13	13	TTCTCCTTCTCTCCTGTGTGGGT	5	-	1459	1548
ENSDARG00000006602	ENSDART00000033947	17	3	3	GACGACAAACGTTTGGCTGAAAC	5	+	258	1560
ENSDARG00000006602	ENSDART00000033947	17	4	4	CCCGTCAGAGATGATTTGGGTGC	5	+	348	1560
ENSDARG00000006602	ENSDART00000033947	17	5	5	TCCATCCGCAACCTCTCTGCATTT	6	+	1227	1560
ENSDARG00000006602	ENSDART00000033947	17	5	5	GTCAGCATCCTGCTAAGCTTGGTAA	7	+	1316	1560
ENSDARG00000006602	ENSDART00000033947	17	5	5	TTCCTCTAATCGGCGAGTATTTGCT	7	+	917	1560
ENSDARG00000006602	ENSDART00000033947	17	5	5	CTAATCGGCGAGTATTTGCTGTT	5	+	922	1560
ENSDARG00000006602	ENSDART00000033947	17	5	5	ATCCGCAACCTCTCTGCATTTGTC	6	+	1230	1560
ENSDARG00000006602	ENSDART00000033947	17	5	5	ACCAGCAAAACTGCAAGATGAAGTT	7	+	521	1560
ENSDARG00000006602	ENSDART00000033947	17	6	6	GGCCTCTTCTTACCGCCGTGGCT	5	+	1534	1560
ENSDARG00000006602	ENSDART00000033947	17	6	6	GACCGCATCTTTCTGTGGATGTT	5	+	1483	1560
ENSDARG00000006602	ENSDART00000080590	17	3	3	GACGACAAACGTTTGGCTGAAAC	5	+	228	1530
ENSDARG00000006602	ENSDART00000080590	17	4	4	CCCGTCAGAGATGATTTGGGTGC	5	+	318	1530
ENSDARG00000006602	ENSDART00000080590	17	5	5	TCCATCCGCAACCTCTCTGCATTT	6	+	1197	1530
ENSDARG00000006602	ENSDART00000080590	17	5	5	GTCAGCATCCTGCTAAGCTTGGTAA	7	+	1286	1530
ENSDARG00000006602	ENSDART00000080590	17	5	5	TTCCTCTAATCGGCGAGTATTTGCT	7	+	887	1530
ENSDARG00000006602	ENSDART00000080590	17	5	5	CTAATCGGCGAGTATTTGCTGTT	5	+	892	1530
ENSDARG00000006602	ENSDART00000080590	17	5	5	ATCCGCAACCTCTCTGCATTTGTC	6	+	1200	1530
ENSDARG00000006602	ENSDART00000080590	17	5	5	ACCAGCAAAACTGCAAGATGAAGTT	7	+	491	1530
ENSDARG00000006602	ENSDART00000080590	17	6	6	GACCGCATCTTTCTGTGGATGTT	5	+	1453	1530
ENSDARG00000006602	ENSDART00000080590	17	6	6	GGCCTCTTCTTACCGCCGTGGCT	5	+	1504	1530
ENSDARG00000007169	ENSDART00000005784	17	2	1	AGAAGCGCCACAGCAGCAGCAGCT	6	+	26	594
ENSDARG00000007169	ENSDART00000005784	17	4	3	AGCAAAACCCTGCAGGAGCCGCT	5	+	238	594
ENSDARG00000007169	ENSDART00000005784	17	4	3	GCAAAACCCTGCAGGAGCCGCTGGA	7	+	239	594
ENSDARG00000007198	ENSDART00000045583	17	1	1	ACCCACTGCTGATCAGGCGAATAG	6	+	56	1524
ENSDARG00000007198	ENSDART00000045583	17	5	5	AGCAAAAGACTCTGCTGGCTGATAA	7	+	413	1524
ENSDARG00000007198	ENSDART00000045583	17	5	5	ACCCACAGCAAAAGACTCTGCTGGC	7	+	407	1524
ENSDARG00000007198	ENSDART00000045583	17	5	5	GCAAAAGACTCTGCTGGCTGATAA	6	+	414	1524
ENSDARG00000007198	ENSDART00000045583	17	7	7	GTCTGCACATGAGCGCTGCAGCA	5	+	656	1524
ENSDARG00000007198	ENSDART00000045583	17	8	8	AACGGCTACGATATGACGCGGGC	5	+	727	1524
ENSDARG00000007198	ENSDART00000045583	17	11	11	AGCCCAATCCTAACCAGCTGAGTGT	7	+	1028	1524
ENSDARG00000007198	ENSDART00000045583	17	11	11	GCCCAATCCTAACCAGCTGAGTGT	6	+	1029	1524
ENSDARG00000007198	ENSDART00000045583	17	12	12	TGCCAACCAGACTAGATGGAGAG	5	+	1253	1524
ENSDARG00000007198	ENSDART00000045583	17	12	12	CTCCCAACATGCAGTGCCGACTCT	6	+	1184	1524
ENSDARG00000007198	ENSDART00000045583	17	12	12	CCCAACCGCAACAACATGGTGGGTG	7	+	1285	1524
ENSDARG00000007198	ENSDART00000045583	17	13	13	ACCTGCACACGTCTCAGATGACGAA	7	+	1391	1524
ENSDARG00000007377	ENSDART00000017510	17	1	1	TTCGCCTTCCTGGAGGAGGGATTC	6	+	40	1380
ENSDARG00000007377	ENSDART00000017510	17	1	1	GACTTCGCCTTCCTGGAGGAGGGA	6	+	37	1380
ENSDARG00000007377	ENSDART00000017510	17	1	1	GACTTCGCCTTCCTGGAGGAGGG	5	+	37	1380
ENSDARG00000007377	ENSDART00000017510	17	2	2	CACCTCCGCTGGCTGCGTGTTTTGC	7	+	163	1380
ENSDARG00000007377	ENSDART00000017510	17	2	2	AGCACCTCCGCTGGCTGCGTGTTT	6	+	161	1380
ENSDARG00000007377	ENSDART00000017510	17	2	2	AGAAGCACCTCCGCTGGCTGCGTGT	7	+	158	1380
ENSDARG00000007377	ENSDART00000017510	17	3	3	CGCCAACCCGTGCAAGCAGGTTTC	6	+	339	1380
ENSDARG00000007377	ENSDART00000017510	17	4	4	ACAGACGACTCGAAGGCTGTTTGC	6	+	478	1380
ENSDARG00000007377	ENSDART00000017510	17	4	4	CGCCACAGACGACTCGAAGGCTGT	6	+	474	1380
ENSDARG00000007377	ENSDART00000017510	17	5	5	ACACCAAACTCAAGTTTGAAGAG	5	+	737	1380
ENSDARG00000007377	ENSDART00000017510	17	5	5	ACCAAACTCAAGTTTGAAGAGGTA	6	+	739	1380
ENSDARG00000007377	ENSDART00000017510	17	5	5	GACACCAAACTCAAGTTTGAAGAG	6	+	736	1380
ENSDARG00000007377	ENSDART00000017510	17	6	6	ATCTGCTTACACACTGGCGGTCAAC	7	+	852	1380
ENSDARG00000007377	ENSDART00000017510	17	10	10	CTAATCGTCATTCAAAGTTTGAGTT	7	+	1124	1380
ENSDARG00000007377	ENSDART00000017510	17	10	10	ACCACCCGCGACCTGGATGAATTT	6	+	1087	1380
ENSDARG00000007377	ENSDART00000103358	17	1	1	TTCGCCTTCCTGGAGGAGGGATTC	6	+	40	1383
ENSDARG00000007377	ENSDART00000103358	17	1	1	GACTTCGCCTTCCTGGAGGAGGGA	6	+	37	1383
ENSDARG00000007377	ENSDART00000103358	17	1	1	GACTTCGCCTTCCTGGAGGAGGG	5	+	37	1383
ENSDARG00000007377	ENSDART00000103358	17	2	2	AGAAGCACCTCCGCTGGCTGCGTGT	7	+	158	1383
ENSDARG00000007377	ENSDART00000103358	17	2	2	AGCACCTCCGCTGGCTGCGTGTTT	6	+	161	1383
ENSDARG00000007377	ENSDART00000103358	17	2	2	CACCTCCGCTGGCTGCGTGTTTTGC	7	+	163	1383
ENSDARG00000007377	ENSDART00000103358	17	3	3	CGCCAACCCGTGCAAGCAGGTTTC	6	+	339	1383
ENSDARG00000007377	ENSDART00000103358	17	4	4	CGCCACAGACGACTCGAAGGCTGT	6	+	474	1383
ENSDARG00000007377	ENSDART00000103358	17	4	4	ACAGACGACTCGAAGGCTGTTTGC	6	+	478	1383
ENSDARG00000007377	ENSDART00000103358	17	5	5	ACACCAAACTCAAGTTTGAAGAG	5	+	737	1383
ENSDARG00000007377	ENSDART00000103358	17	5	5	ACCAAACTCAAGTTTGAAGAGGTA	6	+	739	1383
ENSDARG00000007377	ENSDART00000103358	17	5	5	GACACCAAACTCAAGTTTGAAGAG	6	+	736	1383
ENSDARG00000007377	ENSDART00000103358	17	6	6	ATCTGCTTACACACTGGCGGTCAAC	7	+	852	1383
ENSDARG00000007693	ENSDART00000016597	17	1	1	GAATGCAGAATCACGGACTTTGTC	6	+	160	936
ENSDARG00000007693	ENSDART00000016597	17	1	1	CTCAAACACCGACGAGCGTTTGGA	6	+	90	936
ENSDARG00000007693	ENSDART00000016597	17	3	3	GCCGGCTGCGATGCATCTTTGGTG	6	+	400	936
ENSDARG00000007693	ENSDART00000016597	17	3	3	CTAAAAGCCGGCTGCGATGCATCT	6	+	394	936
ENSDARG00000007693	ENSDART00000016597	17	4	4	GCCTCATCCAGCTCGGCGCAGAT	5	+	602	936
ENSDARG00000007693	ENSDART00000016597	17	4	4	AGCCTCATCCAGCTCGGCGCAGAT	6	+	601	936
ENSDARG00000007693	ENSDART00000016597	17	5	5	CACGTCGCCACACCTAAGGGAAC	5	+	816	936
ENSDARG00000007693	ENSDART00000016597	17	5	5	ATCCAAAAAGTCCTGTATGAGCT	5	+	793	936
ENSDARG00000007693	ENSDART00000016597	17	5	5	ACATCCAAAAAGTCCTGTATGAGCT	7	+	791	936
ENSDARG00000007918	ENSDART00000027247	17	2	2	CTCACCTGCGGTGCTGAAGCTGCT	6	-	73	2487
ENSDARG00000007918	ENSDART00000027247	17	3	3	TGCACCGCAGAGCTGAAGAGGAC	5	-	139	2487
ENSDARG00000007918	ENSDART00000027247	17	3	3	CCCTGCACCGCAGAGCTGAAGAG	5	-	142	2487
ENSDARG00000007918	ENSDART00000027247	17	3	3	CACCGCAGAGCTGAAGAGGACGGC	6	-	136	2487
ENSDARG00000007918	ENSDART00000027247	17	8	8	AGACTCTCCATCCAGCTGAAGAC	5	-	419	2487
ENSDARG00000007918	ENSDART00000027247	17	8	8	GGCGGCGCAGTTGACGAAGATGAC	6	-	487	2487
ENSDARG00000007918	ENSDART00000027247	17	8	8	AGCAGCAGCAGGAGAGGGTTGGAG	6	-	456	2487
ENSDARG00000007918	ENSDART00000027247	17	9	9	AGCGTCCACCAGGGCAGCAGCTGTT	7	-	524	2487
ENSDARG00000007918	ENSDART00000027247	17	10	10	GCCGTCTGCAGATGTTCTTTGGCC	6	-	738	2487
ENSDARG00000007918	ENSDART00000027247	17	14	14	CACAGCCCAGAACTTAGGCTGAGAC	7	-	1125	2487
ENSDARG00000007918	ENSDART00000027247	17	15	15	GAAATCCACCAGAGTCTGAAGGC	5	-	1223	2487
ENSDARG00000007918	ENSDART00000027247	17	17	17	CTCAAAATCTCCTCCGCCTGAGAG	6	-	1443	2487
ENSDARG00000007918	ENSDART00000027247	17	20	20	CACCTCCACGTCCTTGTATTTGTC	6	-	1975	2487
ENSDARG00000007918	ENSDART00000027247	17	21	21	TGCCCAAAAGCTCCTGGAGTTTGGG	7	-	2071	2487
ENSDARG00000007918	ENSDART00000027247	17	21	21	CCCAAAAGCTCCTGGAGTTTGGGTC	7	-	2069	2487
ENSDARG00000007918	ENSDART00000027247	17	21	21	CCCAAAAGCTCCTGGAGTTTGGG	5	-	2071	2487
ENSDARG00000007918	ENSDART00000027247	17	22	22	CACCACAGATTTGAAGCTGCCTGT	6	-	2257	2487
ENSDARG00000007918	ENSDART00000027247	17	22	22	TTCACCACAGATTTGAAGCTGCC	5	-	2260	2487
ENSDARG00000007918	ENSDART00000027247	17	23	23	AGCTGCAGAGCCTCTTGAGGACTGC	7	-	2333	2487
ENSDARG00000007918	ENSDART00000027247	17	23	23	AGCAGCTGCAGAGCCTCTTGAGGA	6	-	2337	2487
ENSDARG00000007918	ENSDART00000063772	17	1	1	CCCTGCACCGCAGAGCTGAAGAG	5	-	70	2136
ENSDARG00000007918	ENSDART00000063772	17	1	1	TGCACCGCAGAGCTGAAGAGGAC	5	-	67	2136
ENSDARG00000007918	ENSDART00000063772	17	1	1	CACCGCAGAGCTGAAGAGGACGGC	6	-	64	2136
ENSDARG00000007918	ENSDART00000063772	17	3	3	GGCGGCGCAGTTGACGAAGATGAC	6	-	427	2136
ENSDARG00000007918	ENSDART00000063772	17	3	3	AGCAGCAGCAGGAGAGGGTTGGAG	6	-	396	2136
ENSDARG00000007918	ENSDART00000063772	17	3	3	AGACTCTCCATCCAGCTGAAGAC	5	-	359	2136
ENSDARG00000007918	ENSDART00000063772	17	4	4	AGCGTCCACCAGGGCAGCAGCTGTT	7	-	464	2136
ENSDARG00000007918	ENSDART00000063772	17	5	5	GCCGTCTGCAGATGTTCTTTGGCC	6	-	678	2136
ENSDARG00000007918	ENSDART00000063772	17	9	9	CACAGCCCAGAACTTAGGCTGAGAC	7	-	1065	2136
ENSDARG00000007918	ENSDART00000063772	17	10	10	GAAATCCACCAGAGTCTGAAGGC	5	-	1163	2136
ENSDARG00000007918	ENSDART00000063772	17	12	12	CTCAAAATCTCCTCCGCCTGAGAG	6	-	1383	2136
ENSDARG00000007918	ENSDART00000063772	17	15	15	CACCTCCACGTCCTTGTATTTGTC	6	-	1915	2136
ENSDARG00000007918	ENSDART00000063772	17	16	16	TGCCCAAAAGCTCCTGGAGTTTGGG	7	-	2011	2136
ENSDARG00000007918	ENSDART00000063772	17	16	16	CCCAAAAGCTCCTGGAGTTTGGGTC	7	-	2009	2136
ENSDARG00000007918	ENSDART00000063772	17	16	16	CCCAAAAGCTCCTGGAGTTTGGG	5	-	2011	2136
ENSDARG00000008192	ENSDART00000024467	17	2	2	CTCCTCCTCTGCAGTGATGTCTTT	6	-	100	1119
ENSDARG00000008192	ENSDART00000024467	17	2	2	TCCTCCTGCTCCTCCTCTGCAGTG	6	-	108	1119
ENSDARG00000008192	ENSDART00000024467	17	3	3	GTTCACAGCCAGAATGCTGACGCC	6	-	586	1119
ENSDARG00000008192	ENSDART00000024467	17	5	5	GACTGCACACATGCGTGCGATGGA	6	-	916	1119
ENSDARG00000008192	ENSDART00000104724	17	2	2	CTCCTCCTCTGCAGTGATGTCTTT	6	-	100	1119
ENSDARG00000008192	ENSDART00000104724	17	2	2	TCCTCCTGCTCCTCCTCTGCAGTG	6	-	108	1119
ENSDARG00000008192	ENSDART00000104724	17	3	3	GTTCACAGCCAGAATGCTGACGCC	6	-	586	1119
ENSDARG00000008192	ENSDART00000104724	17	5	5	GACTGCACACATGCGTGCGATGGA	6	-	916	1119
ENSDARG00000008200	ENSDART00000014546	17	2	2	ACCTGCACCTTTGGCTGTGCTTAA	6	-	121	1518
ENSDARG00000008200	ENSDART00000014546	17	2	2	CTCAGCACCTGCACCTTTGGCTGT	6	-	127	1518
ENSDARG00000008200	ENSDART00000014546	17	7	7	GCAATCTCCAGTAACCGAAGCTTAC	7	-	902	1518
ENSDARG00000008200	ENSDART00000014546	17	7	7	GAATTCATCTACATGAGCCTTGGGA	7	-	933	1518
ENSDARG00000008200	ENSDART00000014546	17	8	8	GAAAACGGCTGCGTGGGACGTTGAT	7	-	1156	1518
ENSDARG00000008200	ENSDART00000014546	17	8	8	CAATCCCCCGTCTATTGTCTGAGAA	7	-	1068	1518
ENSDARG00000008200	ENSDART00000014546	17	8	8	ACAGGCAGAAAACGGCTGCGTGGGA	7	-	1163	1518
ENSDARG00000008200	ENSDART00000014546	17	8	8	AACGGCTGCGTGGGACGTTGATGCC	7	-	1153	1518
ENSDARG00000008200	ENSDART00000040788	17	1	1	TTACTCTGCAAGCTGGAGGAGGAT	6	-	48	1569
ENSDARG00000008200	ENSDART00000040788	17	1	1	TTACTCTGCAAGCTGGAGGAGGA	5	-	49	1569
ENSDARG00000008200	ENSDART00000040788	17	2	2	CTCAGCACCTGCACCTTTGGCTGT	6	-	178	1569
ENSDARG00000008200	ENSDART00000040788	17	2	2	ACCTGCACCTTTGGCTGTGCTTAA	6	-	172	1569
ENSDARG00000008200	ENSDART00000040788	17	7	7	GAATTCATCTACATGAGCCTTGGGA	7	-	984	1569
ENSDARG00000008200	ENSDART00000040788	17	7	7	GCAATCTCCAGTAACCGAAGCTTAC	7	-	953	1569
ENSDARG00000008200	ENSDART00000040788	17	8	8	CAATCCCCCGTCTATTGTCTGAGAA	7	-	1119	1569
ENSDARG00000008200	ENSDART00000040788	17	8	8	AACGGCTGCGTGGGACGTTGATGCC	7	-	1204	1569
ENSDARG00000008200	ENSDART00000040788	17	8	8	ACAGGCAGAAAACGGCTGCGTGGGA	7	-	1214	1569
ENSDARG00000008200	ENSDART00000040788	17	8	8	GAAAACGGCTGCGTGGGACGTTGAT	7	-	1207	1569
ENSDARG00000008203	ENSDART00000020156	17	1	1	ACCGTCTCCTCGCGGACGGAGTA	5	+	335	1077
ENSDARG00000008203	ENSDART00000020156	17	2	2	AGACAAATCATCCATTGATGCAGAC	7	+	747	1077
ENSDARG00000008203	ENSDART00000020156	17	3	3	TTACCCACCCTGGCGGTGGCGTAG	6	+	917	1077
ENSDARG00000008203	ENSDART00000020156	17	3	3	TTACCCACCCTGGCGGTGGCGTA	5	+	917	1077
ENSDARG00000008203	ENSDART00000020156	17	3	3	CCCTCCAACCAATACGGCGTGTAC	6	+	832	1077
ENSDARG00000008203	ENSDART00000020156	17	4	4	GCAAGCAGCAGCACGAAGCCTTG	5	+	1025	1077
ENSDARG00000008203	ENSDART00000020156	17	4	4	AGCAGCAGCACGAAGCCTTGTCT	5	+	1028	1077
ENSDARG00000008212	ENSDART00000017930	17	1	1	AAAATCCCAACGCGGTCTGAGAG	5	-	281	1227
ENSDARG00000008212	ENSDART00000017930	17	1	1	CTCCGCACAGAAGGTAGAGGATGAT	7	-	91	1227
ENSDARG00000008212	ENSDART00000017930	17	1	1	GTAAAATCCCAACGCGGTCTGAGAG	7	-	281	1227
ENSDARG00000008212	ENSDART00000017930	17	1	1	GGCTCCGCACAGAAGGTAGAGGAT	6	-	94	1227
ENSDARG00000008212	ENSDART00000017930	17	2	2	TCCCCAAAACCAATGGTGCTGAA	5	-	715	1227
ENSDARG00000008212	ENSDART00000017930	17	2	2	GTAAAACTCCCTTGCGTCGACGTT	6	-	503	1227
ENSDARG00000008212	ENSDART00000017930	17	2	2	GCCACCGACCGTGGCGGGGGTGGTC	7	-	357	1227
ENSDARG00000008212	ENSDART00000017930	17	2	2	GCCACCGACCGTGGCGGGGGTGGT	6	-	358	1227
ENSDARG00000008212	ENSDART00000017930	17	2	2	ATCCCCAAAACCAATGGTGCTGAA	6	-	715	1227
ENSDARG00000008218	ENSDART00000021000	17	2	2	TCCAGCGGCACACAGGAGGGCTTG	6	-	108	1104
ENSDARG00000008218	ENSDART00000021000	17	2	2	CTCTCACCCAGCGGGATGCAGGC	5	-	67	1104
ENSDARG00000008218	ENSDART00000021000	17	2	2	AGCGGCACACAGGAGGGCTTGAGCT	7	-	104	1104
ENSDARG00000008218	ENSDART00000021000	17	3	3	ACACAAGTCTGACAGCGGCGGGGAC	7	-	162	1104
ENSDARG00000008218	ENSDART00000021000	17	3	3	AGCTCCTGCAGGATTGTGGGTGT	5	-	238	1104
ENSDARG00000008218	ENSDART00000021000	17	3	3	AGCTCCTGCAGGATTGTGGGTGTC	6	-	237	1104
ENSDARG00000008218	ENSDART00000021000	17	3	3	AGCTCCTGCAGGATTGTGGGTGTCT	7	-	236	1104
ENSDARG00000008218	ENSDART00000021000	17	3	3	ACACAAGTCTGACAGCGGCGGGG	5	-	164	1104
ENSDARG00000008218	ENSDART00000021000	17	4	4	ACCAGCGGCTCGGCAGACGCAGCA	6	-	312	1104
ENSDARG00000008218	ENSDART00000021000	17	4	4	AACACCAGCGGCTCGGCAGACGCA	6	-	315	1104
ENSDARG00000008218	ENSDART00000021000	17	4	4	GAACCCGCAGGTACCATGGGGTGCT	7	-	394	1104
ENSDARG00000008218	ENSDART00000021000	17	5	5	TCCTGCAGCAGCTCTCGTATGGGCA	7	-	580	1104
ENSDARG00000008218	ENSDART00000021000	17	5	5	TGCAGCAGCTCTCGTATGGGCAGCG	7	-	577	1104
ENSDARG00000008218	ENSDART00000021000	17	7	7	TGCACCAGCATGTGTTTGCGCAGAC	7	-	893	1104
ENSDARG00000008218	ENSDART00000021000	17	8	8	CTCTTCTTCATGTGGACGTTTCT	5	-	979	1104
ENSDARG00000008218	ENSDART00000075368	17	2	2	TCCAGCGGCACACAGGAGGGCTTG	6	-	108	1041
ENSDARG00000008218	ENSDART00000075368	17	2	2	CTCTCACCCAGCGGGATGCAGGC	5	-	67	1041
ENSDARG00000008218	ENSDART00000075368	17	2	2	AGCGGCACACAGGAGGGCTTGAGCT	7	-	104	1041
ENSDARG00000008218	ENSDART00000075368	17	3	3	AGCTCCTGCAGGATTGTGGGTGTCT	7	-	236	1041
ENSDARG00000008218	ENSDART00000075368	17	3	3	AGCTCCTGCAGGATTGTGGGTGTC	6	-	237	1041
ENSDARG00000008218	ENSDART00000075368	17	3	3	AGCTCCTGCAGGATTGTGGGTGT	5	-	238	1041
ENSDARG00000008218	ENSDART00000075368	17	3	3	ACACAAGTCTGACAGCGGCGGGGAC	7	-	162	1041
ENSDARG00000008218	ENSDART00000075368	17	3	3	ACACAAGTCTGACAGCGGCGGGG	5	-	164	1041
ENSDARG00000008218	ENSDART00000075368	17	5	5	ACCAGCGGCTCGGCAGACGCAGCA	6	-	312	1041
ENSDARG00000008218	ENSDART00000075368	17	5	5	GAACCCGCAGGTACCATGGGGTGCT	7	-	394	1041
ENSDARG00000008218	ENSDART00000075368	17	5	5	AACACCAGCGGCTCGGCAGACGCA	6	-	315	1041
ENSDARG00000008218	ENSDART00000075368	17	6	6	TGCAGCAGCTCTCGTATGGGCAGCG	7	-	577	1041
ENSDARG00000008218	ENSDART00000075368	17	6	6	TCCTGCAGCAGCTCTCGTATGGGCA	7	-	580	1041
ENSDARG00000008218	ENSDART00000075368	17	8	8	TGCACCAGCATGTGTTTGCGCAGAC	7	-	908	1041
ENSDARG00000008218	ENSDART00000075368	17	9	9	CTCTTCTTCATGTGGACGTTTCT	5	-	994	1041
ENSDARG00000008239	ENSDART00000009528	17	9	9	CACCACACACTCTTTCTGCCGGG	5	-	896	1389
ENSDARG00000008239	ENSDART00000009528	17	9	9	CACACCACACACTCTTTCTGCCGGG	7	-	896	1389
ENSDARG00000008239	ENSDART00000009528	17	9	9	ACCATCAAACATCAGCAGCTGCT	5	-	839	1389
ENSDARG00000008239	ENSDART00000009528	17	9	9	ACACCACACACTCTTTCTGCCGGG	6	-	896	1389
ENSDARG00000008239	ENSDART00000009528	17	10	10	CTCTGCTTAGGAGATGTAGCCTTC	6	-	995	1389
ENSDARG00000008239	ENSDART00000009528	17	10	10	GTTCTCTGCTTAGGAGATGTAGCC	6	-	998	1389
ENSDARG00000008239	ENSDART00000009528	17	11	11	GTCCACCTCTACTTTGGGTCTAA	5	-	1088	1389
ENSDARG00000008757	ENSDART00000035432	17	2	1	GGCTCCATCTGAAATTTGAAGAT	5	-	235	1332
ENSDARG00000008757	ENSDART00000035432	17	2	1	GACAGCCCACAAACATGAAGATGAA	7	-	31	1332
ENSDARG00000008757	ENSDART00000035432	17	2	1	ACAGCCCACAAACATGAAGATGAA	6	-	31	1332
ENSDARG00000008803	ENSDART00000002932	17	1	1	AGCAAAAGACGAGACTGCTGCCGAA	7	+	51	696
ENSDARG00000008803	ENSDART00000002932	17	1	1	GCAAAAGACGAGACTGCTGCCGAA	6	+	52	696
ENSDARG00000008803	ENSDART00000002932	17	2	2	TGCCTCTCCGAATGCTGAAGCGGCA	7	+	141	696
ENSDARG00000008803	ENSDART00000002932	17	2	2	GGCCGCTCCGGAGGGTGAAGGAGAG	7	+	255	696
ENSDARG00000008803	ENSDART00000002932	17	2	2	GCCAAAAAAGAAGCTGAAGGTGGA	6	+	418	696
ENSDARG00000008803	ENSDART00000002932	17	2	2	GAATGCCTCTCCGAATGCTGAAGCG	7	+	138	696
ENSDARG00000008803	ENSDART00000002932	17	2	2	GAAGGCCGCTCCGGAGGGTGAAGGA	7	+	252	696
ENSDARG00000008803	ENSDART00000002932	17	2	2	GAAACCAGCCAGCGAGGTAGCTGAG	7	+	594	696
ENSDARG00000008803	ENSDART00000002932	17	2	2	CGCCAAAAAAGAAGCTGAAGGTGGA	7	+	417	696
ENSDARG00000008803	ENSDART00000002932	17	2	2	AGCGCCAAAAAAGAAGCTGAAGGT	6	+	415	696
ENSDARG00000008803	ENSDART00000002932	17	2	2	AAAGGCAGAGGAAGCAGACGCAGAG	7	+	228	696
ENSDARG00000008803	ENSDART00000002932	17	2	2	AAACCAGCCAGCGAGGTAGCTGAG	6	+	595	696
ENSDARG00000009046	ENSDART00000063716	17	1	1	GCCCTCTTCTCTTTGGAGGCATGT	6	-	8	2001
ENSDARG00000009046	ENSDART00000063716	17	5	5	TGCAGCAGCAGCCATATCTGTATCT	7	-	459	2001
ENSDARG00000009046	ENSDART00000063716	17	9	9	ATCGCCGACAGCACATCTGTAGCA	6	-	780	2001
ENSDARG00000009046	ENSDART00000063716	17	9	9	ACCTTCCTCCAGAAGTCTGGATAA	6	-	838	2001
ENSDARG00000009046	ENSDART00000063716	17	12	12	AAAAGCTCCAAGTCTTTGGGTTC	5	-	1128	2001
ENSDARG00000009046	ENSDART00000063716	17	16	16	TACTTCAGACGCGATCTGCTGCT	5	-	1513	2001
ENSDARG00000009046	ENSDART00000063716	17	17	17	AGCATCAGCGAGAATTTGCCTGT	5	-	1589	2001
ENSDARG00000009046	ENSDART00000063716	17	20	20	CTCATCAGCCCAGCAGGGAGTGGGC	7	-	1845	2001
ENSDARG00000009046	ENSDART00000063716	17	20	20	ATCAGCCCAGCAGGGAGTGGGCA	5	-	1844	2001
ENSDARG00000009046	ENSDART00000063716	17	20	20	AGCCCAGCAGGGAGTGGGCATTT	5	-	1841	2001
ENSDARG00000009090	ENSDART00000010568	17	1	1	ATCGTCGACAACTTCGATGCTTTC	6	+	100	1806
ENSDARG00000009090	ENSDART00000010568	17	1	1	AGACACGTCTTTATCGTCGACAAC	6	+	88	1806
ENSDARG00000009090	ENSDART00000010568	17	3	3	ACAGACTCCATAAGGACGCCTTC	5	+	314	1806
ENSDARG00000009090	ENSDART00000010568	17	4	4	GACACCGGCAAGGATGCGTTTGAT	6	+	418	1806
ENSDARG00000009090	ENSDART00000010568	17	5	5	AACGACCACGTGAAGAAGATTTT	5	+	565	1806
ENSDARG00000009090	ENSDART00000010568	17	6	6	AACATCGACTGCCAAGAGGTGGCT	6	+	643	1806
ENSDARG00000009090	ENSDART00000010568	17	6	6	AACAACGTCTCCACAGATGGCTAC	6	+	688	1806
ENSDARG00000009090	ENSDART00000010568	17	6	6	ATCGACTGCCAAGAGGTGGCTGAG	6	+	646	1806
ENSDARG00000009090	ENSDART00000010568	17	16	16	AAAGTCTAAAGAAGGGAAGGAGGG	6	+	1328	1806
ENSDARG00000009253	ENSDART00000005355	17	4	4	GTCTCCGTCACAGGTTTGCAGTT	5	-	310	726
ENSDARG00000009253	ENSDART00000005355	17	5	5	GACACCAGCCTTAAAATCTGGATTG	7	-	381	726
ENSDARG00000009253	ENSDART00000005355	17	5	5	ACACCAGCCTTAAAATCTGGATTG	6	-	381	726
ENSDARG00000009253	ENSDART00000005355	17	8	8	GGCTGCTTCATTCAGAGTAGCGTCT	7	-	582	726
ENSDARG00000009363	ENSDART00000006848	17	5	5	CTCAGCAGCCTTCAGGTCTTTTGGG	7	+	407	2697
ENSDARG00000009363	ENSDART00000006848	17	5	5	GCAGCCTTCAGGTCTTTTGGGCT	5	+	411	2697
ENSDARG00000009363	ENSDART00000006848	17	5	5	CACAAAGGCCAAACTGCGGCGCT	5	+	519	2697
ENSDARG00000009363	ENSDART00000006848	17	7	7	GAACACACAGTTGCTGGCAGAGGCA	7	+	636	2697
ENSDARG00000009363	ENSDART00000006848	17	9	9	AGAAACGTCTGGAAGAGCTGCTGGA	7	+	959	2697
ENSDARG00000009363	ENSDART00000006848	17	11	11	GTCAGCTGCATTCACTGGAGCTGGA	7	+	1223	2697
ENSDARG00000009363	ENSDART00000006848	17	11	11	GCCTCCATCAACATGGAGGAAGGT	6	+	1201	2697
ENSDARG00000009363	ENSDART00000006848	17	11	11	GCATCCAGCCGACTGTTGAAGCT	5	+	1129	2697
ENSDARG00000009363	ENSDART00000006848	17	13	13	AGACCCTCCGTCCAGCAGCTGCA	5	+	1889	2697
ENSDARG00000009363	ENSDART00000006848	17	13	13	AGCAGCTACAACGGGAAGCAGCA	5	+	1682	2697
ENSDARG00000009363	ENSDART00000006848	17	13	13	AGAAAAAGCAGCTGGAGAAGGAGGC	7	+	2246	2697
ENSDARG00000009363	ENSDART00000006848	17	13	13	AGCTACAACGGGAAGCAGCAGCC	5	+	1685	2697
ENSDARG00000009363	ENSDART00000006848	17	13	13	GCAAACAGCGAGGCCCGAGTGAGGG	7	+	1483	2697
ENSDARG00000009363	ENSDART00000006848	17	13	13	GAATGCCACCCTGCGTCTGGCTGT	6	+	1806	2697
ENSDARG00000009363	ENSDART00000006848	17	13	13	AAAAGCAGCTGGAGAAGGAGGCGCG	7	+	2249	2697
ENSDARG00000009363	ENSDART00000006848	17	13	13	AACGGCTGCAACAGACTCTGGAGAA	7	+	2054	2697
ENSDARG00000009363	ENSDART00000006848	17	13	13	ACAATCGCAGACTCAAGAAGTTGGC	7	+	1769	2697
ENSDARG00000009363	ENSDART00000006848	17	13	13	ACAGGCCACCATGGATAAGAAGAC	6	+	2442	2697
ENSDARG00000009363	ENSDART00000006848	17	13	13	ACCAGCAACTTGAGGAGGAGAAC	5	+	1844	2697
ENSDARG00000009363	ENSDART00000062005	17	5	5	CTCAGCAGCCTTCAGGTCTTTTGGG	7	+	416	4017
ENSDARG00000009363	ENSDART00000062005	17	5	5	CACAAAGGCCAAACTGCGGCGCT	5	+	528	4017
ENSDARG00000009363	ENSDART00000062005	17	5	5	GCAGCCTTCAGGTCTTTTGGGCT	5	+	420	4017
ENSDARG00000009363	ENSDART00000062005	17	7	7	GAACACACAGTTGCTGGCAGAGGCA	7	+	645	4017
ENSDARG00000009363	ENSDART00000062005	17	9	9	AGAAACGTCTGGAAGAGCTGCTGGA	7	+	968	4017
ENSDARG00000009363	ENSDART00000062005	17	11	11	GCATCCAGCCGACTGTTGAAGCT	5	+	1135	4017
ENSDARG00000009363	ENSDART00000062005	17	11	11	GTCAGCTGCATTCACTGGAGCTGGA	7	+	1229	4017
ENSDARG00000009363	ENSDART00000062005	17	11	11	GCCTCCATCAACATGGAGGAAGGT	6	+	1207	4017
ENSDARG00000009363	ENSDART00000062005	17	13	13	GAATGCCACCCTGCGTCTGGCTGT	6	+	1812	4017
ENSDARG00000009363	ENSDART00000062005	17	13	13	ACAATCGCAGACTCAAGAAGTTGGC	7	+	1775	4017
ENSDARG00000009363	ENSDART00000062005	17	13	13	AGCTACAACGGGAAGCAGCAGCC	5	+	1691	4017
ENSDARG00000009363	ENSDART00000062005	17	13	13	GCAAACAGCGAGGCCCGAGTGAGGG	7	+	1489	4017
ENSDARG00000009363	ENSDART00000062005	17	13	13	AGCAGCTACAACGGGAAGCAGCA	5	+	1688	4017
ENSDARG00000009363	ENSDART00000062005	17	13	13	AAAAGCAGCTGGAGAAGGAGGCGCG	7	+	2255	4017
ENSDARG00000009363	ENSDART00000062005	17	13	13	AACGGCTGCAACAGACTCTGGAGAA	7	+	2060	4017
ENSDARG00000009363	ENSDART00000062005	17	13	13	ACAGGCCACCATGGATAAGAAGAC	6	+	2448	4017
ENSDARG00000009363	ENSDART00000062005	17	13	13	ACCAGCAACTTGAGGAGGAGAAC	5	+	1850	4017
ENSDARG00000009363	ENSDART00000062005	17	13	13	AGAAAAAGCAGCTGGAGAAGGAGGC	7	+	2252	4017
ENSDARG00000009363	ENSDART00000062005	17	13	13	AGACCCTCCGTCCAGCAGCTGCA	5	+	1895	4017
ENSDARG00000009363	ENSDART00000062005	17	16	16	AGCAAAGGCATGAAGAAGAAGCA	5	+	2786	4017
ENSDARG00000009363	ENSDART00000062005	17	16	16	AAAGACAGACTGATCGATGTTGAG	6	+	2917	4017
ENSDARG00000009363	ENSDART00000062005	17	18	18	AGCTGCAGACTCTGGAGTCGGAGGC	7	+	3176	4017
ENSDARG00000009363	ENSDART00000062005	17	18	18	AGAAACAGCGAGAGGAGGCGAGTGC	7	+	3212	4017
ENSDARG00000009363	ENSDART00000062005	17	18	18	CTCAGCTGCAGACTCTGGAGTCGGA	7	+	3173	4017
ENSDARG00000009363	ENSDART00000062005	17	20	20	AACTGCAGACCAAAGAGCTGAAGAC	7	+	3578	4017
ENSDARG00000009363	ENSDART00000062005	17	21	21	AAAACCAGACCCTGCTGGAGAGAAC	7	+	3794	4017
ENSDARG00000009363	ENSDART00000062005	17	21	21	AGCAAAACCAGACCCTGCTGGAGAG	7	+	3791	4017
ENSDARG00000009363	ENSDART00000062005	17	21	21	AAACCAGACCCTGCTGGAGAGAAC	6	+	3795	4017
ENSDARG00000009363	ENSDART00000062010	17	3	3	AAACAAGTCAACAATGATGTTAAC	6	+	202	3864
ENSDARG00000009363	ENSDART00000062010	17	8	8	CACAAAGGCCAAACTGCGGCGCT	5	+	786	3864
ENSDARG00000009363	ENSDART00000062010	17	8	8	CTCAGCAGCCTTCAGGTCTTTTGGG	7	+	674	3864
ENSDARG00000009363	ENSDART00000062010	17	8	8	GCAGCCTTCAGGTCTTTTGGGCT	5	+	678	3864
ENSDARG00000009363	ENSDART00000062010	17	10	10	GAACACACAGTTGCTGGCAGAGGCA	7	+	903	3864
ENSDARG00000009363	ENSDART00000062010	17	12	12	AGAAACGTCTGGAAGAGCTGCTGGA	7	+	1226	3864
ENSDARG00000009363	ENSDART00000062010	17	13	13	GCATCCAGCCGACTGTTGAAGCT	5	+	1405	3864
ENSDARG00000009363	ENSDART00000062010	17	13	13	GCCTCCATCAACATGGAGGAAGGT	6	+	1477	3864
ENSDARG00000009363	ENSDART00000062010	17	13	13	GTCAGCTGCATTCACTGGAGCTGGA	7	+	1499	3864
ENSDARG00000009363	ENSDART00000062010	17	15	15	AGCAGCTACAACGGGAAGCAGCA	5	+	1958	3864
ENSDARG00000009363	ENSDART00000062010	17	15	15	GCAAACAGCGAGGCCCGAGTGAGGG	7	+	1759	3864
ENSDARG00000009363	ENSDART00000062010	17	15	15	AGCTACAACGGGAAGCAGCAGCC	5	+	1961	3864
ENSDARG00000009363	ENSDART00000062010	17	15	15	ACAATCGCAGACTCAAGAAGTTGGC	7	+	2045	3864
ENSDARG00000009363	ENSDART00000062010	17	16	16	AAAAGCAGCTGGAGAAGGAGGCGCG	7	+	2102	3864
ENSDARG00000009363	ENSDART00000062010	17	16	16	ACAGGCCACCATGGATAAGAAGAC	6	+	2295	3864
ENSDARG00000009363	ENSDART00000062010	17	16	16	AGAAAAAGCAGCTGGAGAAGGAGGC	7	+	2099	3864
ENSDARG00000009363	ENSDART00000062010	17	19	19	AAAGACAGACTGATCGATGTTGAG	6	+	2764	3864
ENSDARG00000009363	ENSDART00000062010	17	19	19	AGCAAAGGCATGAAGAAGAAGCA	5	+	2633	3864
ENSDARG00000009363	ENSDART00000062010	17	21	21	AGCTGCAGACTCTGGAGTCGGAGGC	7	+	3023	3864
ENSDARG00000009363	ENSDART00000062010	17	21	21	CTCAGCTGCAGACTCTGGAGTCGGA	7	+	3020	3864
ENSDARG00000009363	ENSDART00000062010	17	21	21	AGAAACAGCGAGAGGAGGCGAGTGC	7	+	3059	3864
ENSDARG00000009363	ENSDART00000062010	17	23	23	AACTGCAGACCAAAGAGCTGAAGAC	7	+	3425	3864
ENSDARG00000009363	ENSDART00000062010	17	24	24	AAAACCAGACCCTGCTGGAGAGAAC	7	+	3641	3864
ENSDARG00000009363	ENSDART00000062010	17	24	24	AGCAAAACCAGACCCTGCTGGAGAG	7	+	3638	3864
ENSDARG00000009363	ENSDART00000062010	17	24	24	AAACCAGACCCTGCTGGAGAGAAC	6	+	3642	3864
ENSDARG00000009363	ENSDART00000075809	17	3	3	AAACAAGTCAACAATGATGTTAAC	6	+	202	516
ENSDARG00000009866	ENSDART00000080490	17	6	6	CAAGCCGCCGCCACATGTGACTAC	6	+	457	1746
ENSDARG00000009866	ENSDART00000080490	17	7	7	TACTTCACATGCCGAGCGGAGGGA	6	+	601	1746
ENSDARG00000009866	ENSDART00000080490	17	8	8	GGCCAAAAACGTGGCCGGAGAAGTG	7	+	765	1746
ENSDARG00000009866	ENSDART00000080490	17	8	8	GCCAAAAACGTGGCCGGAGAAGTG	6	+	766	1746
ENSDARG00000009866	ENSDART00000080490	17	8	8	GGCTCAATCTTCTGGAAGACGGG	5	+	689	1746
ENSDARG00000009866	ENSDART00000080490	17	9	9	CAAAACATCCACCAGGCAGACGGA	6	+	1009	1746
ENSDARG00000009866	ENSDART00000080490	17	9	9	ACATCACACCTTCAGGAGGACTCT	6	+	980	1746
ENSDARG00000009866	ENSDART00000080490	17	9	9	AACATCACACCTTCAGGAGGACTCT	7	+	979	1746
ENSDARG00000009866	ENSDART00000080490	17	9	9	AACATCCACCAGGCAGACGGAGGA	6	+	1012	1746
ENSDARG00000009866	ENSDART00000080490	17	11	11	ACAGACGGCATGTGGTGCTGTCGAC	7	+	1238	1746
ENSDARG00000009866	ENSDART00000080490	17	13	13	TTCCTCATCTAGCATGGTGCTAAC	6	+	1617	1746
ENSDARG00000009866	ENSDART00000080490	17	14	14	GACTCCACCCGGAGGCAGCTTTT	5	+	1729	1746
ENSDARG00000009866	ENSDART00000080490	17	14	14	AGACTCCACCCGGAGGCAGCTTTT	6	+	1728	1746
ENSDARG00000009867	ENSDART00000046077	17	2	2	CTCCACCACCACAGTGTGGCCGGC	6	-	211	1374
ENSDARG00000009867	ENSDART00000046077	17	2	2	CACCACCACAGTGTGGCCGGCGTT	6	-	208	1374
ENSDARG00000009867	ENSDART00000046077	17	2	2	TCCACCACCACAGTGTGGCCGGC	5	-	211	1374
ENSDARG00000009867	ENSDART00000046077	17	2	2	ACCACCACAGTGTGGCCGGCGTT	5	-	208	1374
ENSDARG00000009867	ENSDART00000046077	17	2	2	TTATTCCACTTGGCAGAAGATGGA	6	-	251	1374
ENSDARG00000009867	ENSDART00000046077	17	3	3	CTCAAATAATCCTGGAAGGTGAA	5	-	317	1374
ENSDARG00000009867	ENSDART00000046077	17	7	7	CACGTCCACTTTCAGAGTAGGGT	5	-	632	1374
ENSDARG00000009867	ENSDART00000046077	17	7	7	CACGTCCACTTTCAGAGTAGGGTAC	7	-	630	1374
ENSDARG00000009867	ENSDART00000046077	17	8	8	TCCACCAGAATTTTCTTCTGCGGCC	7	-	746	1374
ENSDARG00000009867	ENSDART00000046077	17	8	8	GGCTCCCTCCACCAGAATTTTCT	5	-	755	1374
ENSDARG00000009867	ENSDART00000046077	17	9	9	CACATCGCCGATGTTTGCAGGAGGG	7	-	870	1374
ENSDARG00000009867	ENSDART00000046077	17	9	9	ACCGCCAACAGTGCAGTTAGACGAC	7	-	825	1374
ENSDARG00000009867	ENSDART00000046077	17	9	9	TCCCAACTCTAGTAGTGTAGGCC	5	-	909	1374
ENSDARG00000009867	ENSDART00000046077	17	10	10	AACCACAGCGTCTCTTTCTGCCTGT	7	-	1009	1374
ENSDARG00000009867	ENSDART00000046077	17	12	12	TACTCCACCTCCACCTTCTGCAGCA	7	-	1196	1374
ENSDARG00000009867	ENSDART00000046077	17	12	12	CTCCACCTCCACCTTCTGCAGCA	5	-	1196	1374
ENSDARG00000009949	ENSDART00000019905	17	2	2	TGCAGCGTCAGGATGGGTTGATGCA	7	+	122	552
ENSDARG00000009949	ENSDART00000019905	17	2	2	TGCAGCGTCAGGATGGGTTGATGC	6	+	122	552
ENSDARG00000009949	ENSDART00000019905	17	2	2	AAAAAATTCACTTCAGGACGCTTAA	7	+	269	552
ENSDARG00000010113	ENSDART00000014736	17	4	4	CCCCCAGCCATCATCAGGATAGGGC	7	-	192	552
ENSDARG00000010113	ENSDART00000014736	17	4	4	GCCATCATCAGGATAGGGCTGATAA	7	-	186	552
ENSDARG00000010113	ENSDART00000014736	17	6	6	ATCCCAAACATGAACATGGTGAGAC	7	-	416	552
ENSDARG00000010113	ENSDART00000014736	17	6	6	TCCCAAACATGAACATGGTGAGAC	6	-	416	552
ENSDARG00000010113	ENSDART00000014736	17	6	6	GTACTCACCACGGGTTGGTAGGAG	6	-	456	552
ENSDARG00000010113	ENSDART00000014736	17	6	6	TACTCACCACGGGTTGGTAGGAG	5	-	456	552
ENSDARG00000010113	ENSDART00000014736	17	6	6	TACTCACCACGGGTTGGTAGGAGGG	7	-	454	552
ENSDARG00000010113	ENSDART00000014736	17	7	7	CTCTCCAGATACAGGTTGTTGTA	5	-	490	552
ENSDARG00000010113	ENSDART00000105176	17	4	4	CCCCCAGCCATCATCAGGATAGGGC	7	-	192	552
ENSDARG00000010113	ENSDART00000105176	17	4	4	GCCATCATCAGGATAGGGCTGATAA	7	-	186	552
ENSDARG00000010113	ENSDART00000105176	17	6	6	TCCCAAACATGAACATGGTGAGAC	6	-	416	552
ENSDARG00000010113	ENSDART00000105176	17	6	6	TACTCACCACGGGTTGGTAGGAGGG	7	-	454	552
ENSDARG00000010113	ENSDART00000105176	17	6	6	TACTCACCACGGGTTGGTAGGAG	5	-	456	552
ENSDARG00000010113	ENSDART00000105176	17	6	6	GTACTCACCACGGGTTGGTAGGAG	6	-	456	552
ENSDARG00000010113	ENSDART00000105176	17	6	6	ATCCCAAACATGAACATGGTGAGAC	7	-	416	552
ENSDARG00000010113	ENSDART00000105176	17	7	7	CTCTCCAGATACAGGTTGTTGTA	5	-	490	552
ENSDARG00000010181	ENSDART00000026152	17	1	1	CTCACCTCCTCCAGTGCGGATAC	5	-	118	2973
ENSDARG00000010181	ENSDART00000026152	17	6	6	GACCTCACACATCTGAAGCTGGA	5	-	590	2973
ENSDARG00000010181	ENSDART00000026152	17	11	11	TTCTGCCACACTTTCCGCAGCCTGT	7	-	959	2973
ENSDARG00000010181	ENSDART00000026152	17	14	14	CACCTCTCCCAGGATGGCCTTGGTG	7	-	1266	2973
ENSDARG00000010181	ENSDART00000026152	17	15	15	CACAAACCAAGAGCTCGGAGGTGCT	7	-	1453	2973
ENSDARG00000010181	ENSDART00000026152	17	17	17	CACTTCTTACGAGCGAAGCGTTT	5	-	1606	2973
ENSDARG00000010181	ENSDART00000026152	17	17	17	AGCATCACAGAGCGTGTGCAGCT	5	-	1646	2973
ENSDARG00000010181	ENSDART00000026152	17	20	20	TCCTCACACTGCAGATGTTTGAGTC	7	-	1997	2973
ENSDARG00000010181	ENSDART00000026152	17	22	22	GCACAAAGCGTTGCTTGTCTTTAAC	7	-	2239	2973
ENSDARG00000010181	ENSDART00000026152	17	26	26	ACCAAATACGTTTTCCTGGGCATGT	7	-	2774	2973
ENSDARG00000010181	ENSDART00000077151	17	4	4	GACCTCACACATCTGAAGCTGGA	5	-	389	2856
ENSDARG00000010181	ENSDART00000077151	17	9	9	TTCTGCCACACTTTCCGCAGCCTGT	7	-	758	2856
ENSDARG00000010181	ENSDART00000077151	17	12	12	CACCTCTCCCAGGATGGCCTTGGTG	7	-	1065	2856
ENSDARG00000010181	ENSDART00000077151	17	13	13	CACAAACCAAGAGCTCGGAGGTGCT	7	-	1252	2856
ENSDARG00000010181	ENSDART00000077151	17	15	15	CACTTCTTACGAGCGAAGCGTTT	5	-	1405	2856
ENSDARG00000010181	ENSDART00000077151	17	15	15	AGCATCACAGAGCGTGTGCAGCT	5	-	1445	2856
ENSDARG00000010181	ENSDART00000077151	17	18	18	TCCTCACACTGCAGATGTTTGAGTC	7	-	1796	2856
ENSDARG00000010181	ENSDART00000077151	17	20	20	GCACAAAGCGTTGCTTGTCTTTAAC	7	-	2038	2856
ENSDARG00000010181	ENSDART00000077151	17	23	23	TTCACCAGCGGCTATTTGGAGAT	5	-	2441	2856
ENSDARG00000010732	ENSDART00000024644	17	2	2	CCCATCACACAGAAAGATGACGAA	6	-	112	1071
ENSDARG00000010732	ENSDART00000024644	17	2	2	AGCCCATTCCAACTTGAGGAAGAA	6	-	70	1071
ENSDARG00000010732	ENSDART00000024644	17	3	3	TTCTCATAAGACAGCTGCAGTTGGG	7	-	320	1071
ENSDARG00000010732	ENSDART00000024644	17	4	4	CTACTCTTCAGTGATGTGCTGCT	5	-	512	1071
ENSDARG00000010732	ENSDART00000024644	17	4	4	GTTCTCCTCCAACAGGTGCTGGT	5	-	470	1071
ENSDARG00000010732	ENSDART00000024644	17	4	4	GTTCTCTCCTCAGCTTCTGGTTCT	6	-	488	1071
ENSDARG00000010732	ENSDART00000024644	17	4	4	TTCTCCTCCAACAGGTGCTGGTTTG	7	-	467	1071
ENSDARG00000010732	ENSDART00000024644	17	4	4	TCCTCCAACAGGTGCTGGTTTGAG	6	-	465	1071
ENSDARG00000010732	ENSDART00000024644	17	6	6	AGATTCACCTTCTGTAGGAGGTTTT	7	-	810	1071
ENSDARG00000010732	ENSDART00000024644	17	6	6	TTCACCTTCTGTAGGAGGTTTTGGG	7	-	807	1071
ENSDARG00000010732	ENSDART00000024644	17	6	6	TTCACCTTCTGTAGGAGGTTTTG	5	-	809	1071
ENSDARG00000010732	ENSDART00000024644	17	7	7	TGCTGCTCCAGCGTTTTGCGTTT	5	-	934	1071
ENSDARG00000010732	ENSDART00000024644	17	7	7	TGCTCCAGCGTTTTGCGTTTGGC	5	-	931	1071
ENSDARG00000010732	ENSDART00000024644	17	8	8	GTTTGCAGCAGTGTTTGCAGGCTTC	7	-	1026	1071
ENSDARG00000010948	ENSDART00000024194	17	4	3	GTTTGCCCCATATTAGATGAAGTT	6	+	262	3186
ENSDARG00000010948	ENSDART00000024194	17	4	3	AACTGCACAATCTTTGCGTGAGTA	6	+	298	3186
ENSDARG00000010948	ENSDART00000024194	17	5	4	AAAACCTTCACAATGGAAGGTGAC	6	+	337	3186
ENSDARG00000010948	ENSDART00000024194	17	8	7	GAAATCACACTGGATGGGGAAGAG	6	+	745	3186
ENSDARG00000010948	ENSDART00000024194	17	8	7	AAATCACACTGGATGGGGAAGAG	5	+	746	3186
ENSDARG00000010948	ENSDART00000024194	17	9	8	CTCTGCTAACTCTGGGTCGTGTAA	6	+	878	3186
ENSDARG00000010948	ENSDART00000024194	17	9	8	TCCTGCCTCCATCAATCTGGAGGT	6	+	1017	3186
ENSDARG00000010948	ENSDART00000024194	17	9	8	AACATCAACCAGTCTCTGCTAAC	5	+	865	3186
ENSDARG00000010948	ENSDART00000024194	17	13	12	ACAAAAACCAGAGACTGGAGGAGGC	7	+	1373	3186
ENSDARG00000010948	ENSDART00000024194	17	13	12	AAAACCAGAGACTGGAGGAGGCT	5	+	1376	3186
ENSDARG00000010948	ENSDART00000024194	17	13	12	CACCGCCTCAATCAGGAGGAATTC	6	+	1423	3186
ENSDARG00000010948	ENSDART00000024194	17	14	13	CTAAGCTACAAAGGAAGAAGGATGT	7	+	1550	3186
ENSDARG00000010948	ENSDART00000024194	17	14	13	GCAGACCTCACTGAAGGAGCAGAG	6	+	1641	3186
ENSDARG00000010948	ENSDART00000024194	17	14	13	GCATGCAGACCTCACTGAAGGAGCA	7	+	1637	3186
ENSDARG00000010948	ENSDART00000024194	17	14	13	GCCAGCACACAGGATGTCGGTGGT	6	+	1519	3186
ENSDARG00000010948	ENSDART00000024194	17	16	15	GAACACAAACAGCATCTTGAGGA	5	+	1885	3186
ENSDARG00000010948	ENSDART00000024194	17	16	15	AAATACCACAATCTGGCTGAGCA	5	+	1984	3186
ENSDARG00000010948	ENSDART00000024194	17	16	15	ACAAACAGCATCTTGAGGAGGTTCT	7	+	1889	3186
ENSDARG00000010948	ENSDART00000024194	17	16	15	ACAAACAGCATCTTGAGGAGGTT	5	+	1889	3186
ENSDARG00000010948	ENSDART00000024194	17	17	16	GAAAGCAGATATGATGACGTTTTT	6	+	2019	3186
ENSDARG00000010948	ENSDART00000024194	17	17	16	CAACAAATCAGCCAAGCTGGAAAC	6	+	2131	3186
ENSDARG00000010948	ENSDART00000024194	17	18	17	ACACTCAGAATGACTTTGAGGGT	5	+	2222	3186
ENSDARG00000010948	ENSDART00000024194	17	18	17	AGAACCAAATGAATCTGCTGGCGGT	7	+	2195	3186
ENSDARG00000011127	ENSDART00000029771	17	1	1	GTCAACAACTGGCACTGGTGAGAT	6	+	73	1014
ENSDARG00000011127	ENSDART00000029771	17	2	2	GTCATCAGAGAAGCTGAAGGAGCT	6	+	114	1014
ENSDARG00000011141	ENSDART00000010274	17	2	1	AGCACCAGCTTTCCTGTGGCATCT	6	-	165	1695
ENSDARG00000011141	ENSDART00000010274	17	2	1	CACATCCGCTTCTTGTGTGAAGTC	6	-	73	1695
ENSDARG00000011141	ENSDART00000010274	17	2	1	CCCCCATACCTTTGTGCCGCTGTA	6	-	259	1695
ENSDARG00000011141	ENSDART00000010274	17	3	2	GGCATCAGCGTGAGAGCGGGCTTT	6	-	355	1695
ENSDARG00000011141	ENSDART00000010274	17	6	5	TACTCACTCTGTTAGCGATGGTGAT	7	-	709	1695
ENSDARG00000011141	ENSDART00000010274	17	7	6	GTCTCCTGCTGACATGCTGGAAAC	6	-	754	1695
ENSDARG00000011141	ENSDART00000010274	17	9	8	CCCATCGCCTTCTGTTTAGTGGTG	6	-	999	1695
ENSDARG00000011141	ENSDART00000010274	17	11	10	GCCCTCAGCACAAGTGAAGATGCC	6	-	1360	1695
ENSDARG00000011141	ENSDART00000010274	17	11	10	CTCAGCACAAGTGAAGATGCCGTT	6	-	1357	1695
ENSDARG00000011141	ENSDART00000010274	17	11	10	CCCTCAGCACAAGTGAAGATGCC	5	-	1360	1695
ENSDARG00000011141	ENSDART00000010274	17	11	10	AGACCACGCGACCGCGGCTGATAG	6	-	1328	1695
ENSDARG00000011141	ENSDART00000010274	17	12	11	CTCTCACTCCTCCGTGGCGTGTGC	6	-	1568	1695
ENSDARG00000011141	ENSDART00000010274	17	12	11	GCAGCCACATCTCCAGTATAGGGT	6	-	1482	1695
ENSDARG00000011141	ENSDART00000010274	17	12	11	CGCAGCCACATCTCCAGTATAGGGT	7	-	1482	1695
ENSDARG00000011141	ENSDART00000010274	17	12	11	CACTCCTCCGTGGCGTGTGCAGGG	6	-	1564	1695
ENSDARG00000011141	ENSDART00000010274	17	13	12	GGCGCCAGAATCCTTGCAGAAGCT	6	-	1653	1695
ENSDARG00000011235	ENSDART00000008816	17	2	1	TTCTGCACCCCTCCGTTGGATAC	5	+	80	876
ENSDARG00000011235	ENSDART00000008816	17	4	3	CAACTCCACCGCGGATTGCTTGGAT	7	+	768	876
ENSDARG00000011235	ENSDART00000008816	17	4	3	CCCAGCCTCTATCTCGCCGCTGTC	6	+	477	876
ENSDARG00000011235	ENSDART00000008816	17	4	3	GGCTTCAACTCCACCGCGGATTGC	6	+	763	876
ENSDARG00000011235	ENSDART00000008816	17	4	3	AACTCCACCGCGGATTGCTTGGAT	6	+	769	876
ENSDARG00000011235	ENSDART00000103760	17	1	1	TTCTGCACCCCTCCGTTGGATAC	5	+	80	876
ENSDARG00000011235	ENSDART00000103760	17	3	3	GGCTTCAACTCCACCGCGGATTGC	6	+	763	876
ENSDARG00000011235	ENSDART00000103760	17	3	3	CCCAGCCTCTATCTCGCCGCTGTC	6	+	477	876
ENSDARG00000011235	ENSDART00000103760	17	3	3	CAACTCCACCGCGGATTGCTTGGAT	7	+	768	876
ENSDARG00000011235	ENSDART00000103760	17	3	3	AACTCCACCGCGGATTGCTTGGAT	6	+	769	876
ENSDARG00000011370	ENSDART00000023320	17	3	1	TACAACAACTTCCATGCGCCTGT	5	+	157	1611
ENSDARG00000011370	ENSDART00000023320	17	3	1	GAACGCTACGATCCCGGGGAGGAA	6	+	230	1611
ENSDARG00000011370	ENSDART00000023320	17	5	3	GTCGACTCCATACAGGCAGAAGAG	6	+	430	1611
ENSDARG00000011370	ENSDART00000023320	17	6	4	AAACTAGGCCGTAAAGATGCAGAA	6	+	466	1611
ENSDARG00000011370	ENSDART00000023320	17	8	6	GTCAAAACCAAAGATGTATGGGAA	6	+	781	1611
ENSDARG00000011370	ENSDART00000023320	17	9	7	AACGGCAACACTAAAGTGGCAGTG	6	+	880	1611
ENSDARG00000011370	ENSDART00000023320	17	11	9	ATCCACAGAGATCTGCGGTCTGC	5	+	1168	1611
ENSDARG00000011370	ENSDART00000023320	17	11	9	ACATCCACAGAGATCTGCGGTCTGC	7	+	1166	1611
ENSDARG00000011370	ENSDART00000023320	17	11	9	TACATCCACAGAGATCTGCGGTC	5	+	1165	1611
ENSDARG00000011370	ENSDART00000046414	17	1	1	GAACGCTACGATCCCGGGGAGGAA	6	+	230	879
ENSDARG00000011370	ENSDART00000046414	17	1	1	TACAACAACTTCCATGCGCCTGT	5	+	157	879
ENSDARG00000011370	ENSDART00000046414	17	3	3	GTCGACTCCATACAGGCAGAAGAG	6	+	430	879
ENSDARG00000011370	ENSDART00000046414	17	4	4	AAACTAGGCCGTAAAGATGCAGAA	6	+	466	879
ENSDARG00000011370	ENSDART00000046414	17	6	6	GTCAAAACCAAAGATGTATGGGAA	6	+	781	879
ENSDARG00000011434	ENSDART00000010507	17	1	1	TGCTCATCCCAACCAATGTGGTGTT	7	-	265	1104
ENSDARG00000011434	ENSDART00000010507	17	1	1	TCCCAACCAATGTGGTGTTGGTC	5	-	261	1104
ENSDARG00000011434	ENSDART00000010507	17	1	1	GTATCCGCAGCGTTTGGTGATGTG	6	-	418	1104
ENSDARG00000011434	ENSDART00000010507	17	1	1	CTCATCCCAACCAATGTGGTGTTG	6	-	264	1104
ENSDARG00000011434	ENSDART00000010507	17	1	1	CTCATCCCAACCAATGTGGTGTT	5	-	265	1104
ENSDARG00000011434	ENSDART00000010507	17	1	1	ATCCCAACCAATGTGGTGTTGGTC	6	-	261	1104
ENSDARG00000011434	ENSDART00000010507	17	1	1	ATCCCAACCAATGTGGTGTTGGT	5	-	262	1104
ENSDARG00000011434	ENSDART00000010507	17	1	1	AACAGCATCACCGTGGCGTAAAC	5	-	589	1104
ENSDARG00000011466	ENSDART00000007622	17	1	1	GACTTCTCCCAGCAGTAGCTGTT	5	+	12	1374
ENSDARG00000011466	ENSDART00000007622	17	1	1	GACAGCTACGAGAAGATCTGCAGCA	7	+	77	1374
ENSDARG00000011466	ENSDART00000007622	17	1	1	CTCGACTTCTCCCAGCAGTAGCT	5	+	9	1374
ENSDARG00000011466	ENSDART00000007622	17	1	1	CTCCCAGCAGTAGCTGTTTTGGTG	6	+	17	1374
ENSDARG00000011466	ENSDART00000007622	17	1	1	CTCCCAGCAGTAGCTGTTTTGGT	5	+	17	1374
ENSDARG00000011466	ENSDART00000007622	17	1	1	TGCAGCAAAGAGCCGTTGTGGAA	5	+	95	1374
ENSDARG00000011466	ENSDART00000007622	17	3	3	TTCAAATTATATTATCTTTTGGG	5	+	233	1374
ENSDARG00000011466	ENSDART00000007622	17	3	3	TTCAAATTATATTATCTTTTGGGAA	7	+	233	1374
ENSDARG00000011466	ENSDART00000007622	17	3	3	GAAAACAGACTAGCATAAGTGTAG	6	+	203	1374
ENSDARG00000011466	ENSDART00000007622	17	4	4	AAATTCTAACTTCTCTTTGCATCT	6	+	270	1374
ENSDARG00000011466	ENSDART00000007622	17	6	6	TGCCCAAGAGAAAAGTGGGAAGAA	6	+	479	1374
ENSDARG00000011466	ENSDART00000007622	17	7	7	AACCTCTTCCTGAATGGGGTTGT	5	+	631	1374
ENSDARG00000011466	ENSDART00000007622	17	7	7	TCCTCAAGCAGCTCTTTGAGAAC	5	+	611	1374
ENSDARG00000011466	ENSDART00000007622	17	7	7	AACCTCTTCCTGAATGGGGTTGTA	6	+	631	1374
ENSDARG00000011466	ENSDART00000007622	17	7	7	AACCTCTTCCTGAATGGGGTTGTAG	7	+	631	1374
ENSDARG00000011466	ENSDART00000007622	17	9	9	TGCCAAACATTACGTCTGGATTC	5	+	751	1374
ENSDARG00000011466	ENSDART00000007622	17	13	13	ACCCCATTAGATGATCTGTTTGT	5	+	1165	1374
ENSDARG00000011466	ENSDART00000007622	17	14	14	GCCATCTTCACGGGTGAGGAGGAG	6	+	1276	1374
ENSDARG00000011466	ENSDART00000007622	17	14	14	CGCCTCACCGAGATGCAGACGGA	5	+	1327	1374
ENSDARG00000011604	ENSDART00000064146	17	1	1	TACAAAGCAGTGTATGCTGTGGCT	6	+	595	1941
ENSDARG00000011604	ENSDART00000064146	17	1	1	CTACAAAGCAGTGTATGCTGTGGCT	7	+	594	1941
ENSDARG00000011604	ENSDART00000064146	17	1	1	CACAGCAAAAGTTATTGTTGCTTTT	7	+	228	1941
ENSDARG00000011604	ENSDART00000064146	17	1	1	AGAAAAATCATTATTGAAGGATTT	6	+	409	1941
ENSDARG00000011604	ENSDART00000064146	17	1	1	AAAAACTTAAAAAAGTTGTAGAG	5	+	191	1941
ENSDARG00000011604	ENSDART00000064146	17	2	2	GTAGCCCACTATGAAGTTGTCAAC	6	+	772	1941
ENSDARG00000011604	ENSDART00000064146	17	4	4	TACAAAACAACATATGATGGGGAA	6	+	1887	1941
ENSDARG00000011604	ENSDART00000064151	17	2	2	CACCTATACATGCTATTATAGGAG	6	+	347	2418
ENSDARG00000011604	ENSDART00000064151	17	3	3	TACAAAGCAGTGTATGCTGTGGCT	6	+	1090	2418
ENSDARG00000011604	ENSDART00000064151	17	3	3	CTACAAAGCAGTGTATGCTGTGGCT	7	+	1089	2418
ENSDARG00000011604	ENSDART00000064151	17	3	3	CACAGCAAAAGTTATTGTTGCTTTT	7	+	723	2418
ENSDARG00000011604	ENSDART00000064151	17	3	3	AGAAAAATCATTATTGAAGGATTT	6	+	904	2418
ENSDARG00000011604	ENSDART00000064151	17	3	3	AAAAACTTAAAAAAGTTGTAGAG	5	+	686	2418
ENSDARG00000011604	ENSDART00000064151	17	4	4	GTAGCCCACTATGAAGTTGTCAAC	6	+	1267	2418
ENSDARG00000011604	ENSDART00000064151	17	6	6	TACAAAACAACATATGATGGGGAA	6	+	2382	2418
ENSDARG00000011604	ENSDART00000067574	17	2	2	CACCTATACATGCTATTATAGGAG	6	+	422	2508
ENSDARG00000011604	ENSDART00000067574	17	3	3	TACAAAGCAGTGTATGCTGTGGCT	6	+	1165	2508
ENSDARG00000011604	ENSDART00000067574	17	3	3	CTACAAAGCAGTGTATGCTGTGGCT	7	+	1164	2508
ENSDARG00000011604	ENSDART00000067574	17	3	3	CACAGCAAAAGTTATTGTTGCTTTT	7	+	798	2508
ENSDARG00000011604	ENSDART00000067574	17	3	3	AGAAAAATCATTATTGAAGGATTT	6	+	979	2508
ENSDARG00000011604	ENSDART00000067574	17	3	3	AAAAACTTAAAAAAGTTGTAGAG	5	+	761	2508
ENSDARG00000011604	ENSDART00000067574	17	4	4	GTAGCCCACTATGAAGTTGTCAAC	6	+	1342	2508
ENSDARG00000011604	ENSDART00000067574	17	7	7	TACAAAACAACATATGATGGGGAA	6	+	2472	2508
ENSDARG00000012187	ENSDART00000015230	17	3	3	GTCAAACGCTGGTCTGGTGTCTGC	6	+	230	267
ENSDARG00000012271	ENSDART00000010975	17	1	1	GTTTCATACAAAGAGGTTGAAGAG	6	+	160	900
ENSDARG00000012271	ENSDART00000010975	17	1	1	CAACAAAGCTTGCCTGAAGAATGT	6	+	24	900
ENSDARG00000012271	ENSDART00000010975	17	2	2	TTCCACCTCTTGTTGCATTGGAA	5	+	260	900
ENSDARG00000012271	ENSDART00000010975	17	2	2	GTCATCTACCATGGGCCGTATTC	5	+	316	900
ENSDARG00000012271	ENSDART00000010975	17	2	2	GTATTCAAACCAGACAGAAGTATGT	7	+	333	900
ENSDARG00000012271	ENSDART00000010975	17	2	2	AAAGGCACATTTATTAAGCTGCA	5	+	216	900
ENSDARG00000012271	ENSDART00000010975	17	2	2	GAAGTCATCTACCATGGGCCGTA	5	+	313	900
ENSDARG00000012271	ENSDART00000010975	17	2	2	ACATTCCACCTCTTGTTGCATTG	5	+	257	900
ENSDARG00000012271	ENSDART00000010975	17	3	3	GCAATCAGCTATATGATTTTTGC	5	+	454	900
ENSDARG00000012271	ENSDART00000010975	17	3	3	GGCAACAGAAGCGAGCTTTGGTG	5	+	350	900
ENSDARG00000012271	ENSDART00000010975	17	3	3	GGCAACAGAAGCGAGCTTTGGTGTT	7	+	350	900
ENSDARG00000012271	ENSDART00000010975	17	5	5	ACAAAAGGCCTCCACTGGAGCAAAC	7	+	665	900
ENSDARG00000012271	ENSDART00000010975	17	6	6	GCCAAACTCAGCATTAAGTGGAT	5	+	829	900
ENSDARG00000012581	ENSDART00000025315	17	2	2	GCATGCAGAATTCTGGCTGGGAA	5	+	237	693
ENSDARG00000012665	ENSDART00000027882	17	1	1	CTCCAAAAAGCCTCATGGAGATGTC	7	+	24	2286
ENSDARG00000012665	ENSDART00000027882	17	1	1	ACCCCAAGAAGGACGTGCTGACGAG	7	+	74	2286
ENSDARG00000012665	ENSDART00000027882	17	6	6	CTCCTCTTAACCTTCAGGAGCGTAA	7	+	548	2286
ENSDARG00000012665	ENSDART00000027882	17	7	7	GGCTACTTCCTGGAGGCTTTGCT	5	+	643	2286
ENSDARG00000012665	ENSDART00000027882	17	8	8	GTACAACCCTATTTTGGGTATGC	5	+	807	2286
ENSDARG00000012665	ENSDART00000027882	17	9	9	GTCTCCTTCTGGCTGGAGCCGCG	5	+	949	2286
ENSDARG00000012665	ENSDART00000027882	17	10	10	AACACCAGCACCCTGACGGAGAG	5	+	1132	2286
ENSDARG00000012665	ENSDART00000027882	17	10	10	CTCACCGACATCGAGGTGGTGCG	5	+	1198	2286
ENSDARG00000012665	ENSDART00000027882	17	10	10	CCCAGCTCCTCCAGCCTCTGCAGCA	7	+	1159	2286
ENSDARG00000012665	ENSDART00000027882	17	10	10	CACCTCACCGACATCGAGGTGGTG	6	+	1195	2286
ENSDARG00000012665	ENSDART00000027882	17	10	10	AGCCTCTGCAGCATGGATGAAGAG	6	+	1171	2286
ENSDARG00000012665	ENSDART00000027882	17	10	10	ACCGACATCGAGGTGGTGCGCCGGG	7	+	1201	2286
ENSDARG00000012665	ENSDART00000027882	17	10	10	GGCCTAGCAGCTCGAGGAGAAGAT	6	+	1045	2286
ENSDARG00000012665	ENSDART00000027882	17	11	11	GGCTGCAGCCATGCGTAAGGTGGT	6	+	1302	2286
ENSDARG00000012665	ENSDART00000027882	17	11	11	TCCTGCTGCCGATGTGTGAGGCT	5	+	1283	2286
ENSDARG00000012665	ENSDART00000027882	17	13	13	AAACCCTAATTGGAGTAGGAGTA	5	+	1515	2286
ENSDARG00000012665	ENSDART00000027882	17	15	15	TTATGCCTCATGGAAAGAAGAGTAG	7	+	1802	2286
ENSDARG00000012665	ENSDART00000027882	17	15	15	TTATCAGGCCGTTTGGCTGGAGCC	6	+	1831	2286
ENSDARG00000012665	ENSDART00000027882	17	16	16	ACAAACTTAGTGAGCAGAAGCAGAA	7	+	2060	2286
ENSDARG00000012665	ENSDART00000027882	17	17	17	GTTTCAGACCCCAATGTGTCTTC	5	+	2275	2286
ENSDARG00000012665	ENSDART00000027882	17	17	17	GTTCTCTAAAGGCTGGAGTCGAG	5	+	2142	2286
ENSDARG00000012665	ENSDART00000080999	17	1	1	CTCCAAAAAGCCTCATGGAGATGTC	7	+	15	3453
ENSDARG00000012665	ENSDART00000080999	17	1	1	ACCCCAAGAAGGACGTGCTGACGAG	7	+	65	3453
ENSDARG00000012665	ENSDART00000080999	17	6	6	CTCCTCTTAACCTTCAGGAGCGTAA	7	+	536	3453
ENSDARG00000012665	ENSDART00000080999	17	7	7	GGCTACTTCCTGGAGGCTTTGCT	5	+	631	3453
ENSDARG00000012665	ENSDART00000080999	17	8	8	GTACAACCCTATTTTGGGTATGC	5	+	795	3453
ENSDARG00000012665	ENSDART00000080999	17	9	9	GTCTCCTTCTGGCTGGAGCCGCG	5	+	937	3453
ENSDARG00000012665	ENSDART00000080999	17	10	10	CTCACCGACATCGAGGTGGTGCG	5	+	1186	3453
ENSDARG00000012665	ENSDART00000080999	17	10	10	CCCAGCTCCTCCAGCCTCTGCAGCA	7	+	1147	3453
ENSDARG00000012665	ENSDART00000080999	17	10	10	CACCTCACCGACATCGAGGTGGTG	6	+	1183	3453
ENSDARG00000012665	ENSDART00000080999	17	10	10	AGCCTCTGCAGCATGGATGAAGAG	6	+	1159	3453
ENSDARG00000012665	ENSDART00000080999	17	10	10	GGCCTAGCAGCTCGAGGAGAAGAT	6	+	1033	3453
ENSDARG00000012665	ENSDART00000080999	17	10	10	AACACCAGCACCCTGACGGAGAG	5	+	1120	3453
ENSDARG00000012665	ENSDART00000080999	17	10	10	ACCGACATCGAGGTGGTGCGCCGGG	7	+	1189	3453
ENSDARG00000012665	ENSDART00000080999	17	11	11	TCCTGCTGCCGATGTGTGAGGCT	5	+	1271	3453
ENSDARG00000012665	ENSDART00000080999	17	11	11	GGCTGCAGCCATGCGTAAGGTGGT	6	+	1290	3453
ENSDARG00000012665	ENSDART00000080999	17	12	12	AAACCCTAATTGGAGTAGGAGTA	5	+	1467	3453
ENSDARG00000012665	ENSDART00000080999	17	14	14	TTATCAGGCCGTTTGGCTGGAGCC	6	+	1783	3453
ENSDARG00000012665	ENSDART00000080999	17	14	14	TTATGCCTCATGGAAAGAAGAGTAG	7	+	1754	3453
ENSDARG00000012665	ENSDART00000080999	17	15	15	ACAAACTTAGTGAGCAGAAGCAGAA	7	+	2012	3453
ENSDARG00000012665	ENSDART00000080999	17	16	16	GTTCTCTAAAGGCTGGAGTCGAG	5	+	2094	3453
ENSDARG00000012665	ENSDART00000080999	17	17	17	TTAGTCCGCAGCCAGCAGAGGAC	5	+	2837	3453
ENSDARG00000012665	ENSDART00000080999	17	17	17	CAATCAACCCGAGGGCGAAGCGGAG	7	+	2631	3453
ENSDARG00000012665	ENSDART00000080999	17	17	17	TTCAGCAGCCACTCGGTTGGGGC	5	+	3088	3453
ENSDARG00000012665	ENSDART00000080999	17	17	17	TCCATCAGCGGGGCTAGACGTGGAC	7	+	3166	3453
ENSDARG00000012665	ENSDART00000080999	17	17	17	TTCAGCAGCCACTCGGTTGGGGCG	6	+	3088	3453
ENSDARG00000012665	ENSDART00000080999	17	17	17	GTCCGCAGCCAGCAGAGGACGGT	5	+	2840	3453
ENSDARG00000012665	ENSDART00000080999	17	17	17	CCCTCCACAGAGTCTGTGCTGTT	5	+	3004	3453
ENSDARG00000012665	ENSDART00000080999	17	17	17	AGCCTCCGCTTCCCCGCAGTAGCA	6	+	2327	3453
ENSDARG00000012665	ENSDART00000080999	17	17	17	AGCAGCCACTCGGTTGGGGCGAA	5	+	3091	3453
ENSDARG00000012665	ENSDART00000080999	17	17	17	CTCCGCTTCCCCGCAGTAGCAGTG	6	+	2330	3453
ENSDARG00000012665	ENSDART00000080999	17	17	17	GACAGCAGCAGGTGGCTCTGTTGGG	7	+	3263	3453
ENSDARG00000012665	ENSDART00000080999	17	17	17	GCCCTCCACAGAGTCTGTGCTGTT	6	+	3003	3453
ENSDARG00000012693	ENSDART00000012545	17	2	2	GTCAACAACAGCAGTCGCCGAGGAG	7	+	710	1035
ENSDARG00000012693	ENSDART00000012545	17	2	2	GCAGTCGCCGAGGAGAGTGGCTGTC	7	+	720	1035
ENSDARG00000012693	ENSDART00000012545	17	2	2	CTACACGCAGCGCCAAGGAGGAAAC	7	+	472	1035
ENSDARG00000012693	ENSDART00000012545	17	2	2	CAAACCAACAGCAAATGCAGCAGCA	7	+	800	1035
ENSDARG00000012693	ENSDART00000012545	17	2	2	AGCAGCTTCAACAGGAGGGCAAC	5	+	683	1035
ENSDARG00000012693	ENSDART00000012545	17	2	2	AGCAGCAGCAGAACGGAGGAGGGG	6	+	818	1035
ENSDARG00000012693	ENSDART00000012545	17	2	2	AGCAGCAGCAGAACGGAGGAGGG	5	+	818	1035
ENSDARG00000012693	ENSDART00000012545	17	2	2	AACAGCAAATGCAGCAGCAGCAGAA	7	+	806	1035
ENSDARG00000012693	ENSDART00000012545	17	2	2	ACACGCAGCGCCAAGGAGGAAAC	5	+	474	1035
ENSDARG00000012693	ENSDART00000012545	17	2	2	ACCAACAGCAAATGCAGCAGCAGCA	7	+	803	1035
ENSDARG00000012693	ENSDART00000012545	17	2	2	AGAATCATCGCTACAAGATGAAGCG	7	+	635	1035
ENSDARG00000012693	ENSDART00000012545	17	2	2	AGCAGCAGAACGGAGGAGGGGTC	5	+	821	1035
ENSDARG00000012833	ENSDART00000015729	17	1	1	TTCCCACCATCAAACTGGAGAAGGG	7	+	143	951
ENSDARG00000012833	ENSDART00000015729	17	1	1	TTATGCCTCCCAGTAAGAAGCCGGA	7	+	20	951
ENSDARG00000012833	ENSDART00000015729	17	1	1	TGCCAATGCCCCCACGGGGTGGAA	6	+	462	951
ENSDARG00000012833	ENSDART00000015729	17	1	1	CTCTCCCTCAATAAGTGTTTTAA	5	+	505	951
ENSDARG00000012833	ENSDART00000015729	17	1	1	CCCACCATCAAACTGGAGAAGGG	5	+	145	951
ENSDARG00000012833	ENSDART00000015729	17	1	1	CAATGCCCCCACGGGGTGGAAGAA	6	+	465	951
ENSDARG00000012833	ENSDART00000015729	17	1	1	ATCACCAGAGCCCTGCAGGAGGC	5	+	100	951
ENSDARG00000012833	ENSDART00000015729	17	1	1	ACCATCAAACTGGAGAAGGGGAG	5	+	148	951
ENSDARG00000012874	ENSDART00000025501	17	2	1	TACCTCATCTGTAACTTGGTTGGCT	7	-	45	642
ENSDARG00000012874	ENSDART00000025501	17	3	2	GCCATCTGCAACATCCGCCTAGTGC	7	-	77	642
ENSDARG00000012874	ENSDART00000025501	17	5	4	ACACACACAGACCACAGCATTTGGA	7	-	238	642
ENSDARG00000012874	ENSDART00000025501	17	5	4	ACACACAGACCACAGCATTTGGA	5	-	238	642
ENSDARG00000012874	ENSDART00000025501	17	6	5	TTCCTCACCTCTTGATGTAGGGGCC	7	-	433	642
ENSDARG00000012874	ENSDART00000025501	17	7	6	GTCCAAAGCCAGATTTTTGAGAT	5	-	518	642
ENSDARG00000012874	ENSDART00000025501	17	8	7	GGCTTCATCAATGCGAGCTTTGTTC	7	-	603	642
ENSDARG00000013020	ENSDART00000040588	17	1	1	CTCATCTCCATGAAGAGCTGTCTCT	7	-	53	1704
ENSDARG00000013020	ENSDART00000040588	17	3	3	CAACACACCTGTCATAAGTGGCC	5	-	357	1704
ENSDARG00000013020	ENSDART00000040588	17	3	3	GACTGCTCCACGTTTATCTGGTGCG	7	-	305	1704
ENSDARG00000013020	ENSDART00000040588	17	5	5	CTCACCTGCTGAGGGAAGCATGT	5	-	595	1704
ENSDARG00000013020	ENSDART00000040588	17	7	7	ACATTCCACTGGATGGAAGACTGC	6	-	715	1704
ENSDARG00000013020	ENSDART00000040588	17	7	7	TGCTCCTTCATCTGGTGCTGGTTGC	7	-	851	1704
ENSDARG00000013020	ENSDART00000040588	17	9	9	CTCTTCATCCAGTCGGCTGGGAC	5	-	1022	1704
ENSDARG00000013020	ENSDART00000040588	17	12	12	TCCTGCAGAGCTGACATGCGCCTCT	7	-	1322	1704
ENSDARG00000013020	ENSDART00000040588	17	13	13	TCCTGCGGCGTGTGTGTGGGGGTTG	7	-	1487	1704
ENSDARG00000013020	ENSDART00000040588	17	13	13	TCCTGCGGCGTGTGTGTGGGGGTT	6	-	1488	1704
ENSDARG00000013020	ENSDART00000040588	17	13	13	TCCTGCGGCGTGTGTGTGGGGGT	5	-	1489	1704
ENSDARG00000013020	ENSDART00000076026	17	1	1	CTCATCTCCATGAAGAGCTGTCTCT	7	-	53	1890
ENSDARG00000013020	ENSDART00000076026	17	3	3	CAACACACCTGTCATAAGTGGCC	5	-	357	1890
ENSDARG00000013020	ENSDART00000076026	17	3	3	GACTGCTCCACGTTTATCTGGTGCG	7	-	305	1890
ENSDARG00000013020	ENSDART00000076026	17	5	5	CTCACCTGCTGAGGGAAGCATGT	5	-	595	1890
ENSDARG00000013020	ENSDART00000076026	17	7	7	ACATTCCACTGGATGGAAGACTGC	6	-	715	1890
ENSDARG00000013020	ENSDART00000076026	17	7	7	TGCTCCTTCATCTGGTGCTGGTTGC	7	-	851	1890
ENSDARG00000013020	ENSDART00000076026	17	14	14	CTCTTCATCCAGTCGGCTGGGAC	5	-	1196	1890
ENSDARG00000013020	ENSDART00000076026	17	17	17	TCCTGCAGAGCTGACATGCGCCTCT	7	-	1496	1890
ENSDARG00000013020	ENSDART00000076026	17	19	19	TCCTGCGGCGTGTGTGTGGGGGTTG	7	-	1682	1890
ENSDARG00000013020	ENSDART00000076026	17	19	19	TCCTGCGGCGTGTGTGTGGGGGTT	6	-	1683	1890
ENSDARG00000013020	ENSDART00000076026	17	19	19	TCCTGCGGCGTGTGTGTGGGGGT	5	-	1684	1890
ENSDARG00000013020	ENSDART00000104010	17	1	1	CTCATCTCCATGAAGAGCTGTCTCT	7	-	53	1746
ENSDARG00000013020	ENSDART00000104010	17	3	3	GACTGCTCCACGTTTATCTGGTGCG	7	-	305	1746
ENSDARG00000013020	ENSDART00000104010	17	3	3	CAACACACCTGTCATAAGTGGCC	5	-	357	1746
ENSDARG00000013020	ENSDART00000104010	17	5	5	CTCACCTGCTGAGGGAAGCATGT	5	-	595	1746
ENSDARG00000013020	ENSDART00000104010	17	7	7	TGCTCCTTCATCTGGTGCTGGTTGC	7	-	851	1746
ENSDARG00000013020	ENSDART00000104010	17	7	7	ACATTCCACTGGATGGAAGACTGC	6	-	715	1746
ENSDARG00000013020	ENSDART00000104010	17	10	10	CTACACATCTAATAGGTTTTTCT	5	-	1023	1746
ENSDARG00000013020	ENSDART00000104010	17	12	12	CTCTTCATCCAGTCGGCTGGGAC	5	-	1124	1746
ENSDARG00000013020	ENSDART00000104010	17	15	15	TCCTGCAGAGCTGACATGCGCCTCT	7	-	1424	1746
ENSDARG00000013020	ENSDART00000104010	17	16	16	TCCTGCGGCGTGTGTGTGGGGGT	5	-	1591	1746
ENSDARG00000013020	ENSDART00000104010	17	16	16	TCCTGCGGCGTGTGTGTGGGGGTT	6	-	1590	1746
ENSDARG00000013020	ENSDART00000104010	17	16	16	TCCTGCGGCGTGTGTGTGGGGGTTG	7	-	1589	1746
ENSDARG00000013020	ENSDART00000104011	17	1	1	CTCATCTCCATGAAGAGCTGTCTCT	7	-	53	1905
ENSDARG00000013020	ENSDART00000104011	17	3	3	CAACACACCTGTCATAAGTGGCC	5	-	357	1905
ENSDARG00000013020	ENSDART00000104011	17	3	3	GACTGCTCCACGTTTATCTGGTGCG	7	-	305	1905
ENSDARG00000013020	ENSDART00000104011	17	5	5	CTCACCTGCTGAGGGAAGCATGT	5	-	595	1905
ENSDARG00000013020	ENSDART00000104011	17	7	7	ACATTCCACTGGATGGAAGACTGC	6	-	715	1905
ENSDARG00000013020	ENSDART00000104011	17	7	7	TGCTCCTTCATCTGGTGCTGGTTGC	7	-	851	1905
ENSDARG00000013020	ENSDART00000104011	17	14	14	CTCTTCATCCAGTCGGCTGGGAC	5	-	1262	1905
ENSDARG00000013020	ENSDART00000104011	17	17	17	TCCTGCAGAGCTGACATGCGCCTCT	7	-	1562	1905
ENSDARG00000013020	ENSDART00000104011	17	19	19	TCCTGCGGCGTGTGTGTGGGGGT	5	-	1750	1905
ENSDARG00000013020	ENSDART00000104011	17	19	19	TCCTGCGGCGTGTGTGTGGGGGTT	6	-	1749	1905
ENSDARG00000013020	ENSDART00000104011	17	19	19	TCCTGCGGCGTGTGTGTGGGGGTTG	7	-	1748	1905
ENSDARG00000013020	ENSDART00000104012	17	1	1	CTCATCTCCATGAAGAGCTGTCTCT	7	-	53	1830
ENSDARG00000013020	ENSDART00000104012	17	3	3	GACTGCTCCACGTTTATCTGGTGCG	7	-	305	1830
ENSDARG00000013020	ENSDART00000104012	17	3	3	CAACACACCTGTCATAAGTGGCC	5	-	357	1830
ENSDARG00000013020	ENSDART00000104012	17	5	5	CTCACCTGCTGAGGGAAGCATGT	5	-	595	1830
ENSDARG00000013020	ENSDART00000104012	17	7	7	ACATTCCACTGGATGGAAGACTGC	6	-	715	1830
ENSDARG00000013020	ENSDART00000104012	17	7	7	TGCTCCTTCATCTGGTGCTGGTTGC	7	-	851	1830
ENSDARG00000013020	ENSDART00000104012	17	14	14	CTCTTCATCCAGTCGGCTGGGAC	5	-	1193	1830
ENSDARG00000013020	ENSDART00000104012	17	17	17	TCCTGCAGAGCTGACATGCGCCTCT	7	-	1493	1830
ENSDARG00000013020	ENSDART00000104012	17	18	18	TCCTGCGGCGTGTGTGTGGGGGTTG	7	-	1658	1830
ENSDARG00000013020	ENSDART00000104012	17	18	18	TCCTGCGGCGTGTGTGTGGGGGTT	6	-	1659	1830
ENSDARG00000013020	ENSDART00000104012	17	18	18	TCCTGCGGCGTGTGTGTGGGGGT	5	-	1660	1830
ENSDARG00000013020	ENSDART00000104014	17	1	1	CTCATCTCCATGAAGAGCTGTCTCT	7	-	53	1776
ENSDARG00000013020	ENSDART00000104014	17	3	3	GACTGCTCCACGTTTATCTGGTGCG	7	-	305	1776
ENSDARG00000013020	ENSDART00000104014	17	3	3	CAACACACCTGTCATAAGTGGCC	5	-	357	1776
ENSDARG00000013020	ENSDART00000104014	17	5	5	CTCACCTGCTGAGGGAAGCATGT	5	-	595	1776
ENSDARG00000013020	ENSDART00000104014	17	7	7	ACATTCCACTGGATGGAAGACTGC	6	-	715	1776
ENSDARG00000013020	ENSDART00000104014	17	7	7	TGCTCCTTCATCTGGTGCTGGTTGC	7	-	851	1776
ENSDARG00000013020	ENSDART00000104014	17	11	11	CTCTTCATCCAGTCGGCTGGGAC	5	-	1130	1776
ENSDARG00000013020	ENSDART00000104014	17	14	14	TCCTGCAGAGCTGACATGCGCCTCT	7	-	1430	1776
ENSDARG00000013020	ENSDART00000104014	17	15	15	TCCTGCGGCGTGTGTGTGGGGGTTG	7	-	1595	1776
ENSDARG00000013020	ENSDART00000104014	17	15	15	TCCTGCGGCGTGTGTGTGGGGGTT	6	-	1596	1776
ENSDARG00000013020	ENSDART00000104014	17	15	15	TCCTGCGGCGTGTGTGTGGGGGT	5	-	1597	1776
ENSDARG00000013020	ENSDART00000104015	17	1	1	CTCATCTCCATGAAGAGCTGTCTCT	7	-	53	1920
ENSDARG00000013020	ENSDART00000104015	17	3	3	GACTGCTCCACGTTTATCTGGTGCG	7	-	305	1920
ENSDARG00000013020	ENSDART00000104015	17	3	3	CAACACACCTGTCATAAGTGGCC	5	-	357	1920
ENSDARG00000013020	ENSDART00000104015	17	5	5	CTCACCTGCTGAGGGAAGCATGT	5	-	595	1920
ENSDARG00000013020	ENSDART00000104015	17	7	7	ACATTCCACTGGATGGAAGACTGC	6	-	715	1920
ENSDARG00000013020	ENSDART00000104015	17	7	7	TGCTCCTTCATCTGGTGCTGGTTGC	7	-	851	1920
ENSDARG00000013020	ENSDART00000104015	17	14	14	AACTCCAGAAAAGCTGTTGTTAAC	6	-	1137	1920
ENSDARG00000013020	ENSDART00000104015	17	14	14	TTAAACTCCAGAAAAGCTGTTGTT	6	-	1140	1920
ENSDARG00000013020	ENSDART00000104015	17	15	15	AAAACCTTCATTGAGGGAGAATGC	6	-	1171	1920
ENSDARG00000013020	ENSDART00000104015	17	18	18	CTCTTCATCCAGTCGGCTGGGAC	5	-	1274	1920
ENSDARG00000013020	ENSDART00000104015	17	21	21	TCCTGCAGAGCTGACATGCGCCTCT	7	-	1574	1920
ENSDARG00000013020	ENSDART00000104015	17	22	22	TCCTGCGGCGTGTGTGTGGGGGTTG	7	-	1739	1920
ENSDARG00000013020	ENSDART00000104015	17	22	22	TCCTGCGGCGTGTGTGTGGGGGTT	6	-	1740	1920
ENSDARG00000013020	ENSDART00000104015	17	22	22	TCCTGCGGCGTGTGTGTGGGGGT	5	-	1741	1920
ENSDARG00000013020	ENSDART00000104018	17	1	1	CTCATCTCCATGAAGAGCTGTCTCT	7	-	53	1929
ENSDARG00000013020	ENSDART00000104018	17	3	3	GACTGCTCCACGTTTATCTGGTGCG	7	-	305	1929
ENSDARG00000013020	ENSDART00000104018	17	3	3	CAACACACCTGTCATAAGTGGCC	5	-	357	1929
ENSDARG00000013020	ENSDART00000104018	17	5	5	CTCACCTGCTGAGGGAAGCATGT	5	-	595	1929
ENSDARG00000013020	ENSDART00000104018	17	7	7	ACATTCCACTGGATGGAAGACTGC	6	-	715	1929
ENSDARG00000013020	ENSDART00000104018	17	7	7	TGCTCCTTCATCTGGTGCTGGTTGC	7	-	851	1929
ENSDARG00000013020	ENSDART00000104018	17	13	13	CTCTTCATCCAGTCGGCTGGGAC	5	-	1262	1929
ENSDARG00000013020	ENSDART00000104018	17	16	16	TCCTGCAGAGCTGACATGCGCCTCT	7	-	1562	1929
ENSDARG00000013020	ENSDART00000104018	17	18	18	TCCTGCGGCGTGTGTGTGGGGGTTG	7	-	1748	1929
ENSDARG00000013020	ENSDART00000104018	17	18	18	TCCTGCGGCGTGTGTGTGGGGGTT	6	-	1749	1929
ENSDARG00000013020	ENSDART00000104018	17	18	18	TCCTGCGGCGTGTGTGTGGGGGT	5	-	1750	1929
ENSDARG00000013020	ENSDART00000104019	17	2	2	CTCATCTCCATGAAGAGCTGTCTCT	7	-	86	1776
ENSDARG00000013020	ENSDART00000104019	17	4	4	GACTGCTCCACGTTTATCTGGTGCG	7	-	338	1776
ENSDARG00000013020	ENSDART00000104019	17	4	4	CAACACACCTGTCATAAGTGGCC	5	-	390	1776
ENSDARG00000013020	ENSDART00000104019	17	6	6	CTCACCTGCTGAGGGAAGCATGT	5	-	628	1776
ENSDARG00000013020	ENSDART00000104019	17	8	8	ACATTCCACTGGATGGAAGACTGC	6	-	748	1776
ENSDARG00000013020	ENSDART00000104019	17	8	8	TGCTCCTTCATCTGGTGCTGGTTGC	7	-	884	1776
ENSDARG00000013020	ENSDART00000104019	17	11	11	CTCTTCATCCAGTCGGCTGGGAC	5	-	1130	1776
ENSDARG00000013020	ENSDART00000104019	17	14	14	TCCTGCAGAGCTGACATGCGCCTCT	7	-	1430	1776
ENSDARG00000013020	ENSDART00000104019	17	15	15	TCCTGCGGCGTGTGTGTGGGGGTTG	7	-	1595	1776
ENSDARG00000013020	ENSDART00000104019	17	15	15	TCCTGCGGCGTGTGTGTGGGGGTT	6	-	1596	1776
ENSDARG00000013020	ENSDART00000104019	17	15	15	TCCTGCGGCGTGTGTGTGGGGGT	5	-	1597	1776
ENSDARG00000013020	ENSDART00000104020	17	2	2	CTCATCTCCATGAAGAGCTGTCTCT	7	-	71	1914
ENSDARG00000013020	ENSDART00000104020	17	4	4	GACTGCTCCACGTTTATCTGGTGCG	7	-	323	1914
ENSDARG00000013020	ENSDART00000104020	17	4	4	CAACACACCTGTCATAAGTGGCC	5	-	375	1914
ENSDARG00000013020	ENSDART00000104020	17	6	6	CTCACCTGCTGAGGGAAGCATGT	5	-	613	1914
ENSDARG00000013020	ENSDART00000104020	17	8	8	ACATTCCACTGGATGGAAGACTGC	6	-	733	1914
ENSDARG00000013020	ENSDART00000104020	17	8	8	TGCTCCTTCATCTGGTGCTGGTTGC	7	-	869	1914
ENSDARG00000013020	ENSDART00000104020	17	11	11	CTAAGCACAGGAAACTAAGGCTAC	6	-	1100	1914
ENSDARG00000013020	ENSDART00000104020	17	14	14	CTCTTCATCCAGTCGGCTGGGAC	5	-	1211	1914
ENSDARG00000013020	ENSDART00000104020	17	17	17	TCCTGCAGAGCTGACATGCGCCTCT	7	-	1511	1914
ENSDARG00000013020	ENSDART00000104020	17	19	19	TCCTGCGGCGTGTGTGTGGGGGTTG	7	-	1697	1914
ENSDARG00000013020	ENSDART00000104020	17	19	19	TCCTGCGGCGTGTGTGTGGGGGTT	6	-	1698	1914
ENSDARG00000013020	ENSDART00000104020	17	19	19	TCCTGCGGCGTGTGTGTGGGGGT	5	-	1699	1914
ENSDARG00000013266	ENSDART00000025019	17	6	5	GCACTCGCAGGGGACGCCTAGGGA	6	-	331	813
ENSDARG00000013266	ENSDART00000025019	17	7	6	GTCCTCGTCGTCGTACGCGTTGTTG	7	-	708	813
ENSDARG00000013266	ENSDART00000025019	17	7	6	GCCCGCGTCAGTCACGTAGCCGGC	6	-	577	813
ENSDARG00000013266	ENSDART00000025019	17	7	6	CTCGTCGTCGTACGCGTTGTTGGG	6	-	706	813
ENSDARG00000013266	ENSDART00000025019	17	7	6	CTCCACACAGTCCTCGTCGTCGTA	6	-	718	813
ENSDARG00000013266	ENSDART00000025019	17	7	6	AGCTGCCGCATCTTTGGGCATAG	5	-	542	813
ENSDARG00000013266	ENSDART00000104086	17	5	5	GTCCTCGTCGTCGTACGCGTTGTTG	7	-	507	606
ENSDARG00000013266	ENSDART00000104086	17	5	5	GCCCGCGTCAGTCACGTAGCCGGC	6	-	376	606
ENSDARG00000013266	ENSDART00000104086	17	5	5	CTCGTCGTCGTACGCGTTGTTGGG	6	-	505	606
ENSDARG00000013266	ENSDART00000104086	17	5	5	CTCCACACAGTCCTCGTCGTCGTA	6	-	517	606
ENSDARG00000013266	ENSDART00000104086	17	5	5	AGCTGCCGCATCTTTGGGCATAG	5	-	341	606
ENSDARG00000013343	ENSDART00000013170	17	1	1	CCCTGCCTCTTACGAGCAGTCAAC	6	+	136	4728
ENSDARG00000013343	ENSDART00000013170	17	1	1	GTCAAAGACACCCCTGGCATGGGCA	7	+	163	4728
ENSDARG00000013343	ENSDART00000013170	17	2	2	CTCCAAAGATGTTCGCGTTTGAT	5	+	353	4728
ENSDARG00000013343	ENSDART00000013170	17	2	2	CTCCAAAGATGTTCGCGTTTGATGC	7	+	353	4728
ENSDARG00000013343	ENSDART00000013170	17	2	2	AGCTCCTTCCTGAAGGTCGATTCT	6	+	244	4728
ENSDARG00000013343	ENSDART00000013170	17	2	2	TCCTCCAAAGATGTTCGCGTTTGAT	7	+	351	4728
ENSDARG00000013343	ENSDART00000013170	17	3	3	GCAGACGGCTGTGTGTTTTGCTTTG	7	+	457	4728
ENSDARG00000013343	ENSDART00000013170	17	4	4	AAAGACGACTCAATGCAGAGTTT	5	+	520	4728
ENSDARG00000013343	ENSDART00000013170	17	5	5	TCCTACAGCAGAGAAGGCCGCTTTC	7	+	786	4728
ENSDARG00000013343	ENSDART00000013170	17	5	5	GAAAAAACCGGCAAGGGTGGAAGTA	7	+	922	4728
ENSDARG00000013343	ENSDART00000013170	17	6	6	GGCAGCTGCGTGAAGGTTTTGAGCA	7	+	982	4728
ENSDARG00000013343	ENSDART00000013170	17	6	6	CACCTCATCGACCTGGGCAGCTGCG	7	+	967	4728
ENSDARG00000013343	ENSDART00000013170	17	6	6	GGCAGCTGCGTGAAGGTTTTGAG	5	+	982	4728
ENSDARG00000013343	ENSDART00000013170	17	8	8	TGCGTCGCCCAACCCAGCTGAGAAC	7	+	1319	4728
ENSDARG00000013343	ENSDART00000013170	17	10	10	GAATCCATCAGTGGTGGGAGCAGCA	7	+	1720	4728
ENSDARG00000013343	ENSDART00000013170	17	10	10	CTCTCAGCAGGATAGAAGGAGAT	5	+	2369	4728
ENSDARG00000013343	ENSDART00000013170	17	10	10	AACCTCTCCAGTGGGAATGAGCC	5	+	1959	4728
ENSDARG00000013343	ENSDART00000013170	17	10	10	ACAGCCACAGTTATGCTGGAGCA	5	+	2092	4728
ENSDARG00000013343	ENSDART00000013170	17	10	10	CACAGCCACAGTTATGCTGGAGCA	6	+	2091	4728
ENSDARG00000013343	ENSDART00000013170	17	11	11	GGCCTCACCGTTGCAGCAGCGGGC	6	+	4007	4728
ENSDARG00000013343	ENSDART00000013170	17	11	11	TACCGCTACCTGAGTGGGGAGTA	5	+	3076	4728
ENSDARG00000013343	ENSDART00000013170	17	11	11	TTCTACCACAGTGGTGGCAGCAGTG	7	+	4096	4728
ENSDARG00000013343	ENSDART00000013170	17	11	11	GAAGGCCTCACCGTTGCAGCAGCG	6	+	4004	4728
ENSDARG00000013343	ENSDART00000013170	17	11	11	AACCCAGTCTCTGAGTCGTAGCA	5	+	3780	4728
ENSDARG00000013343	ENSDART00000013170	17	11	11	AGCATCAACCGTAGTTTGCTGTC	5	+	3526	4728
ENSDARG00000013343	ENSDART00000013170	17	11	11	CACAAACCAGACAAGCTGTCTTC	5	+	2593	4728
ENSDARG00000013343	ENSDART00000013170	17	11	11	AGAGCCACACTTGAAAGAAGAAGTT	7	+	3139	4728
ENSDARG00000013343	ENSDART00000013170	17	11	11	ACACAAACCAGACAAGCTGTCTTC	6	+	2592	4728
ENSDARG00000013343	ENSDART00000013170	17	11	11	ACATACCGCTACCTGAGTGGGGA	5	+	3073	4728
ENSDARG00000013343	ENSDART00000013170	17	12	12	GACACCTCCTCTCCCATAAGAAAAC	7	+	4291	4728
ENSDARG00000013343	ENSDART00000013170	17	12	12	TCCGGCCCACACAGAGGGGATTAG	6	+	4355	4728
ENSDARG00000013343	ENSDART00000013170	17	12	12	GCCCACACAGAGGGGATTAGCTGAA	7	+	4359	4728
ENSDARG00000013343	ENSDART00000013170	17	12	12	CACCTCCTCTCCCATAAGAAAAC	5	+	4293	4728
ENSDARG00000013343	ENSDART00000013170	17	14	14	TTCTGCAAAGCTCATCTGATGAT	5	+	4696	4728
ENSDARG00000013343	ENSDART00000013170	17	14	14	TTCAGCAGACGTTTGAAGTGGAC	5	+	4613	4728
ENSDARG00000013343	ENSDART00000013170	17	14	14	ACCTTCAGCAGACGTTTGAAGTG	5	+	4610	4728
ENSDARG00000013343	ENSDART00000050607	17	1	1	CTCCAAAGATGTTCGCGTTTGAT	5	+	173	4230
ENSDARG00000013343	ENSDART00000050607	17	1	1	CTCCAAAGATGTTCGCGTTTGATGC	7	+	173	4230
ENSDARG00000013343	ENSDART00000050607	17	1	1	AGCTCCTTCCTGAAGGTCGATTCT	6	+	64	4230
ENSDARG00000013343	ENSDART00000050607	17	1	1	TCCTCCAAAGATGTTCGCGTTTGAT	7	+	171	4230
ENSDARG00000013343	ENSDART00000050607	17	2	2	GCAGACGGCTGTGTGTTTTGCTTTG	7	+	277	4230
ENSDARG00000013343	ENSDART00000050607	17	3	3	AAAGACGACTCAATGCAGAGTTT	5	+	340	4230
ENSDARG00000013343	ENSDART00000050607	17	4	4	TCCTACAGCAGAGAAGGCCGCTTTC	7	+	600	4230
ENSDARG00000013343	ENSDART00000050607	17	4	4	GAAAAAACCGGCAAGGGTGGAAGTA	7	+	736	4230
ENSDARG00000013343	ENSDART00000050607	17	5	5	GGCAGCTGCGTGAAGGTTTTGAGCA	7	+	796	4230
ENSDARG00000013343	ENSDART00000050607	17	5	5	GGCAGCTGCGTGAAGGTTTTGAG	5	+	796	4230
ENSDARG00000013343	ENSDART00000050607	17	5	5	CACCTCATCGACCTGGGCAGCTGCG	7	+	781	4230
ENSDARG00000013343	ENSDART00000050607	17	7	7	AGAACCCCCTCAAATGGTGGTAGCC	7	+	1392	4230
ENSDARG00000013343	ENSDART00000050607	17	7	7	TGCGTCGCCCAACCCAGCTGAGAAC	7	+	1133	4230
ENSDARG00000013343	ENSDART00000050607	17	7	7	AACCCCCTCAAATGGTGGTAGCC	5	+	1394	4230
ENSDARG00000013343	ENSDART00000050607	17	7	7	ACAGTCTTCGATAGGCAGTTGTG	5	+	1773	4230
ENSDARG00000013343	ENSDART00000050607	17	8	8	CTCTCAGCAGGATAGAAGGAGAT	5	+	2372	4230
ENSDARG00000013343	ENSDART00000050607	17	8	8	CACAGCCACAGTTATGCTGGAGCA	6	+	2094	4230
ENSDARG00000013343	ENSDART00000050607	17	8	8	ACAGCCACAGTTATGCTGGAGCA	5	+	2095	4230
ENSDARG00000013343	ENSDART00000050607	17	8	8	AACCTCTCCAGTGGGAATGAGCC	5	+	1962	4230
ENSDARG00000013343	ENSDART00000050607	17	10	10	TACCGCTACCTGAGTGGGGAGTA	5	+	2644	4230
ENSDARG00000013343	ENSDART00000050607	17	10	10	AGAGCCACACTTGAAAGAAGAAGTT	7	+	2707	4230
ENSDARG00000013343	ENSDART00000050607	17	10	10	AGCATCAACCGTAGTTTGCTGTC	5	+	3094	4230
ENSDARG00000013343	ENSDART00000050607	17	10	10	ACATACCGCTACCTGAGTGGGGA	5	+	2641	4230
ENSDARG00000013343	ENSDART00000050607	17	11	11	AACCCAGTCTCTGAGTCGTAGCA	5	+	3309	4230
ENSDARG00000013343	ENSDART00000050607	17	11	11	TTCTACCACAGTGGTGGCAGCAGTG	7	+	3625	4230
ENSDARG00000013343	ENSDART00000050607	17	11	11	GGCCTCACCGTTGCAGCAGCGGGC	6	+	3536	4230
ENSDARG00000013343	ENSDART00000050607	17	11	11	GAAGGCCTCACCGTTGCAGCAGCG	6	+	3533	4230
ENSDARG00000013343	ENSDART00000050607	17	15	15	TTCAGCAGACGTTTGAAGTGGAC	5	+	4112	4230
ENSDARG00000013343	ENSDART00000050607	17	15	15	ACCTTCAGCAGACGTTTGAAGTG	5	+	4109	4230
ENSDARG00000013343	ENSDART00000050607	17	15	15	TTCTGCAAAGCTCATCTGATGAT	5	+	4195	4230
ENSDARG00000013409	ENSDART00000019364	17	1	1	GAACGCAGAGCAGGTTAGCAGAC	5	+	237	1158
ENSDARG00000013409	ENSDART00000019364	17	1	1	CTCCCAGCAGCTCCGCAGTGGTT	5	+	176	1158
ENSDARG00000013409	ENSDART00000019364	17	1	1	TTCGGCTTCTGAGCATGTTTGGGC	6	+	137	1158
ENSDARG00000013409	ENSDART00000019364	17	1	1	TTCGGCTTCTGAGCATGTTTGGGCT	7	+	137	1158
ENSDARG00000013409	ENSDART00000019364	17	2	2	TCCATCCCAGACGAGGAGTTGGTG	6	+	400	1158
ENSDARG00000013409	ENSDART00000019364	17	2	2	TCCATCCCAGACGAGGAGTTGGT	5	+	400	1158
ENSDARG00000013409	ENSDART00000019364	17	2	2	GCATTCTACTGCCAGGGCGAGTGC	6	+	943	1158
ENSDARG00000013409	ENSDART00000019364	17	2	2	GACTCCAGAAAACATGTGCGCGTAA	7	+	691	1158
ENSDARG00000013409	ENSDART00000019364	17	2	2	GACGTCAGCAGAGCTGCGCGTTT	5	+	423	1158
ENSDARG00000013409	ENSDART00000019364	17	2	2	CTAAACAACGCAAGTGCGGGATTT	6	+	469	1158
ENSDARG00000013409	ENSDART00000019364	17	2	2	ATCCCAGACGAGGAGTTGGTGAC	5	+	403	1158
ENSDARG00000013409	ENSDART00000019364	17	2	2	ACCTCCATCCCAGACGAGGAGTTG	6	+	397	1158
ENSDARG00000013409	ENSDART00000019364	17	2	2	ACATTCCCCGAGCCTGCTGCGTGC	6	+	1043	1158
ENSDARG00000013443	ENSDART00000007021	17	1	1	CTCCCAGCCCAGACTGAGTGAGTT	6	+	102	1518
ENSDARG00000013443	ENSDART00000007021	17	1	1	TACATCTCCCAGCCCAGACTGAGTG	7	+	97	1518
ENSDARG00000013443	ENSDART00000007021	17	2	2	AGCCTACACTACTGTGTCTGGTGTG	7	+	117	1518
ENSDARG00000013443	ENSDART00000007021	17	2	2	AGCCTACACTACTGTGTCTGGTGT	6	+	117	1518
ENSDARG00000013443	ENSDART00000007021	17	3	3	GTCATCGGCACCAAAGCTGTCGTT	6	+	247	1518
ENSDARG00000013443	ENSDART00000007021	17	6	6	CCCATCAACCCACAGTGTCGTATCT	7	+	451	1518
ENSDARG00000013443	ENSDART00000007021	17	6	6	GACTGCCGCATAATGAGGTGTGC	5	+	569	1518
ENSDARG00000013443	ENSDART00000007021	17	12	12	ACCCGCAAAGATCACGCTGATGTC	6	+	1213	1518
ENSDARG00000013443	ENSDART00000007021	17	13	13	TCCTGCAGAAGTTTGAGAAGAATTT	7	+	1343	1518
ENSDARG00000013443	ENSDART00000007021	17	14	14	GACAACAGAACGGTGTTTGAGAC	5	+	1387	1518
ENSDARG00000013443	ENSDART00000007021	17	14	14	CTCAAAGCACATTGGCCGAATTC	5	+	1469	1518
ENSDARG00000013461	ENSDART00000010362	17	2	1	TTCAGCTTCATCAGGCCGCAGTT	5	+	42	1242
ENSDARG00000013461	ENSDART00000010362	17	2	1	CCCTGCCCACGTTATTAGAGGGC	5	+	269	1242
ENSDARG00000013461	ENSDART00000010362	17	3	2	CTCTACTGCCTTCCCTGATGTATTG	7	+	645	1242
ENSDARG00000013461	ENSDART00000010362	17	3	2	CACAGCTACATGCTGCAGGTGAG	5	+	748	1242
ENSDARG00000013461	ENSDART00000010362	17	3	2	ATCTGCGGCTCACCAAGTTGCTGCG	7	+	590	1242
ENSDARG00000013461	ENSDART00000010362	17	4	3	GAACCCAGAAAAGGCTCTGGAGGA	6	+	804	1242
ENSDARG00000013461	ENSDART00000010362	17	5	4	ACAGCCCTCCCTTGTGGCATTTGGC	7	+	1004	1242
ENSDARG00000013461	ENSDART00000103871	17	1	1	TTCAGCTTCATCAGGCCGCAGTT	5	+	42	831
ENSDARG00000013461	ENSDART00000103871	17	1	1	CCCTGCCCACGTTATTAGAGGGC	5	+	269	831
ENSDARG00000013461	ENSDART00000103871	17	2	2	CACAGCTACATGCTGCAGGTGAG	5	+	748	831
ENSDARG00000013461	ENSDART00000103871	17	2	2	CTCTACTGCCTTCCCTGATGTATTG	7	+	645	831
ENSDARG00000013461	ENSDART00000103871	17	2	2	ATCTGCGGCTCACCAAGTTGCTGCG	7	+	590	831
ENSDARG00000013461	ENSDART00000103871	17	4	4	GAACCCAGAAAAGGCTCTGGAGGA	6	+	799	831
ENSDARG00000013794	ENSDART00000012210	17	3	3	CAACTCAACAGTGCCAGCAGACTGT	7	+	881	1374
ENSDARG00000013794	ENSDART00000012210	17	3	3	AGCAGCGCCACACAGGTCGACTTT	6	+	973	1374
ENSDARG00000013794	ENSDART00000012210	17	3	3	AGAAGCCCAGCCCTGGGGTGAAGTC	7	+	773	1374
ENSDARG00000013794	ENSDART00000012210	17	3	3	CCCAGCCCCCAGAGATCTGCATGC	6	+	382	1374
ENSDARG00000013794	ENSDART00000012210	17	3	3	AACTCAACAGTGCCAGCAGACTGT	6	+	882	1374
ENSDARG00000013794	ENSDART00000012210	17	4	4	CACCGCAGCCAAGACTTTGCCTAC	6	+	1317	1374
ENSDARG00000013794	ENSDART00000012210	17	4	4	ACACACACAGGTGAGAAGAAGTT	5	+	1171	1374
ENSDARG00000013794	ENSDART00000012210	17	4	4	GAACACACACAGGTGAGAAGAAGTT	7	+	1169	1374
ENSDARG00000013794	ENSDART00000012210	17	4	4	TTCAGCTGCAATTGGGAAGGCTGC	6	+	1102	1374
ENSDARG00000013794	ENSDART00000074879	17	3	3	CCCAGCCCCCAGAGATCTGCATGC	6	+	379	1371
ENSDARG00000013794	ENSDART00000074879	17	3	3	CAACTCAACAGTGCCAGCAGACTGT	7	+	878	1371
ENSDARG00000013794	ENSDART00000074879	17	3	3	AGCAGCGCCACACAGGTCGACTTT	6	+	970	1371
ENSDARG00000013794	ENSDART00000074879	17	3	3	AGAAGCCCAGCCCTGGGGTGAAGTC	7	+	770	1371
ENSDARG00000013794	ENSDART00000074879	17	3	3	AACTCAACAGTGCCAGCAGACTGT	6	+	879	1371
ENSDARG00000013794	ENSDART00000074879	17	4	4	ACACACACAGGTGAGAAGAAGTT	5	+	1168	1371
ENSDARG00000013794	ENSDART00000074879	17	4	4	CACCGCAGCCAAGACTTTGCCTAC	6	+	1314	1371
ENSDARG00000013794	ENSDART00000074879	17	4	4	GAACACACACAGGTGAGAAGAAGTT	7	+	1166	1371
ENSDARG00000013794	ENSDART00000074879	17	4	4	TTCAGCTGCAATTGGGAAGGCTGC	6	+	1099	1371
ENSDARG00000013926	ENSDART00000020167	17	2	1	TACAACACCCCAACAGATTGAGGG	6	-	105	1536
ENSDARG00000013926	ENSDART00000020167	17	3	2	CAACAATGCCATAGGAGAAGATGAG	7	-	331	1536
ENSDARG00000013926	ENSDART00000020167	17	3	2	ACCATCACACCACTGAAGATGGT	5	-	262	1536
ENSDARG00000013926	ENSDART00000020167	17	4	3	CAAGTCCACAGCCCATGCCTTGAAC	7	-	352	1536
ENSDARG00000013926	ENSDART00000020167	17	5	4	GTTTTCGGCTAAGCCGGGTTTGGT	6	-	706	1536
ENSDARG00000013926	ENSDART00000020167	17	5	4	TTCGGCTAAGCCGGGTTTGGTTT	5	-	704	1536
ENSDARG00000013926	ENSDART00000020167	17	5	4	TTCGGCTAAGCCGGGTTTGGTTTT	6	-	703	1536
ENSDARG00000013926	ENSDART00000020167	17	5	4	GCCAGCGCCCCAATGATAAGCAGAC	7	-	527	1536
ENSDARG00000013926	ENSDART00000020167	17	5	4	AGAAAAACCCAACAGAGGCTGAA	5	-	1191	1536
ENSDARG00000013926	ENSDART00000020167	17	5	4	AGCTCATTCTGGAGTGTGGCGTAA	6	-	477	1536
ENSDARG00000013926	ENSDART00000020167	17	5	4	AGCTCATTCTGGAGTGTGGCGTA	5	-	478	1536
ENSDARG00000013926	ENSDART00000020167	17	5	4	AGAATCAGCTTACCGATGCCTGT	5	-	1045	1536
ENSDARG00000013926	ENSDART00000020167	17	5	4	GTTTTCGGCTAAGCCGGGTTTGGTT	7	-	705	1536
ENSDARG00000013926	ENSDART00000020167	17	6	5	ACAGTCAAAAGAGTGGTGCTGTT	5	-	1502	1536
ENSDARG00000013926	ENSDART00000020167	17	6	5	GTTTACATCCTCTTCTGCTTGAGAA	7	-	1470	1536
ENSDARG00000013926	ENSDART00000020167	17	6	5	GTCAAAAGAGTGGTGCTGTTGTG	5	-	1499	1536
ENSDARG00000014106	ENSDART00000008355	17	2	2	GCAGGCAGATTTTAGTGGGAGAT	5	+	164	498
[truncated: 10,118 more rows]
