# Supplementary material for: Rapid Mutation of Endogenous Zebrafish Genes Using Zinc Finger Nucleases Made by Oligomerized Pool ENgineering (OPEN)
Source: PLoS One. 2009 Feb 9;4(2):e4348. doi: 10.1371/journal.pone.0004348 (PMC2634973; doi:10.1371/journal.pone.0004348)
Supplement: Table S19 — Potential OPEN ZFN target sites in gene transcripts encoded on zebrafish chromosome 19. Data presented as described in the legend to Table S1. (2.06 MB XLS) [file pone.0004348.s019.xls]

## Sheet: Chromosome19
Gene ID	Transcript ID	Chromosome Number	Exon Number	Coding Exon Number	TargetSite	ZFN Spacer Length	Strand	ZFN Cleavage Site	Coding Sequence Length
ENSDARG00000000503	ENSDART00000000522	19	2	2	GTCATCGTCACTGTCCTTAGCCTGT	7	-	33	861
ENSDARG00000000503	ENSDART00000000522	19	4	4	AACTCCTGCTTAGTCTCTGCAGAA	6	-	204	861
ENSDARG00000000503	ENSDART00000000522	19	4	4	TCCTCCAACTCCTGCTTAGTCTCT	6	-	210	861
ENSDARG00000000503	ENSDART00000000522	19	7	7	TCCAGCTCCTCATTGGTAGTTGTT	6	-	477	861
ENSDARG00000000503	ENSDART00000000522	19	10	10	CTCCCAAAATTACACAGCAGATGAT	7	-	808	861
ENSDARG00000000503	ENSDART00000081951	19	2	2	GTCATCGTCACTGTCCTTAGCCTGT	7	-	36	864
ENSDARG00000000503	ENSDART00000081951	19	4	4	AACTCCTGCTTAGTCTCTGCAGAA	6	-	207	864
ENSDARG00000000503	ENSDART00000081951	19	4	4	TCCTCCAACTCCTGCTTAGTCTCT	6	-	213	864
ENSDARG00000000503	ENSDART00000081951	19	7	7	TCCAGCTCCTCATTGGTAGTTGTT	6	-	480	864
ENSDARG00000000503	ENSDART00000081951	19	10	10	CTCCCAAAATTACACAGCAGATGAT	7	-	811	864
ENSDARG00000000503	ENSDART00000082137	19	2	2	GTCATCGTCACTGTCCTTAGCCTGT	7	-	33	675
ENSDARG00000000503	ENSDART00000082137	19	4	4	TCCTCCAACTCCTGCTTAGTCTCT	6	-	210	675
ENSDARG00000000503	ENSDART00000082137	19	4	4	AACTCCTGCTTAGTCTCTGCAGAA	6	-	204	675
ENSDARG00000000503	ENSDART00000082137	19	7	7	TCCAGCTCCTCATTGGTAGTTGTT	6	-	477	675
ENSDARG00000000503	ENSDART00000082137	19	9	9	CTCCCAAAATTACACAGCAGATGAT	7	-	622	675
ENSDARG00000000656	ENSDART00000000698	19	1	1	GAAGTCAAAACCGGGGTGAGTTT	5	+	52	654
ENSDARG00000000656	ENSDART00000000698	19	4	4	GTCAGCACATCTCATTGTTGCAGGC	7	+	348	654
ENSDARG00000000656	ENSDART00000000698	19	4	4	CTCTGCTGCTACTCTGGTGAAGAA	6	+	297	654
ENSDARG00000000656	ENSDART00000000698	19	4	4	GACCCCCTCGTATGCTCTGCTGCT	6	+	283	654
ENSDARG00000000656	ENSDART00000000698	19	5	5	GTCTACGCAACATTGAGTGGTTTGC	7	+	397	654
ENSDARG00000000656	ENSDART00000000698	19	5	5	GTCTACGCAACATTGAGTGGTTT	5	+	397	654
ENSDARG00000000656	ENSDART00000000698	19	5	5	CTACGCAACATTGAGTGGTTTGCT	6	+	399	654
ENSDARG00000000656	ENSDART00000000698	19	5	5	CTACGCAACATTGAGTGGTTTGC	5	+	399	654
ENSDARG00000000656	ENSDART00000000698	19	6	6	CTCTCACTCTGGCGATGGGCCGGG	6	+	539	654
ENSDARG00000000656	ENSDART00000000698	19	6	6	TTCACCAGCTCTCACTCTGGCGAT	6	+	531	654
ENSDARG00000000656	ENSDART00000104829	19	3	3	GTCAGCACATCTCATTGTTGCAGGC	7	+	291	630
ENSDARG00000000656	ENSDART00000104829	19	3	3	CTCTGCTGCTACTCTGGTGAAGAA	6	+	240	630
ENSDARG00000000656	ENSDART00000104829	19	3	3	GACCCCCTCGTATGCTCTGCTGCT	6	+	226	630
ENSDARG00000000656	ENSDART00000104829	19	4	4	GTCTACGCAACATTGAGTGGTTTGC	7	+	340	630
ENSDARG00000000656	ENSDART00000104829	19	4	4	GTCTACGCAACATTGAGTGGTTT	5	+	340	630
ENSDARG00000000656	ENSDART00000104829	19	4	4	CTACGCAACATTGAGTGGTTTGCT	6	+	342	630
ENSDARG00000000656	ENSDART00000104829	19	4	4	CTACGCAACATTGAGTGGTTTGC	5	+	342	630
ENSDARG00000000656	ENSDART00000104829	19	5	5	CTCTCACTCTGGCGATGGGCCGGG	6	+	482	630
ENSDARG00000000656	ENSDART00000104829	19	5	5	TTCACCAGCTCTCACTCTGGCGAT	6	+	474	630
ENSDARG00000000729	ENSDART00000046620	19	2	2	TGCTTCAGAACAGTGCAGAGTTC	5	-	409	1257
ENSDARG00000000729	ENSDART00000046620	19	2	2	GTCGGCAAAGCCTTGGAGTATCT	5	-	295	1257
ENSDARG00000000729	ENSDART00000046620	19	2	2	GAAAGCGACTGTATGGAGCTTCT	5	-	448	1257
ENSDARG00000000729	ENSDART00000046620	19	3	3	CTCAAATCCCCCTCCTGAAGCCGGC	7	-	653	1257
ENSDARG00000000729	ENSDART00000046620	19	3	3	CAAATCCCCCTCCTGAAGCCGGC	5	-	653	1257
ENSDARG00000000729	ENSDART00000046620	19	6	6	GACCTCCTCCAGGCTGCTGATGGC	6	-	1150	1257
ENSDARG00000000729	ENSDART00000093181	19	4	2	TGCTTCAGAACAGTGCAGAGTTC	5	-	409	2148
ENSDARG00000000729	ENSDART00000093181	19	4	2	GTCGGCAAAGCCTTGGAGTATCT	5	-	295	2148
ENSDARG00000000729	ENSDART00000093181	19	4	2	GAAAGCGACTGTATGGAGCTTCT	5	-	448	2148
ENSDARG00000000729	ENSDART00000093181	19	5	3	CTCAAATCCCCCTCCTGAAGCCGGC	7	-	653	2148
ENSDARG00000000729	ENSDART00000093181	19	5	3	CAAATCCCCCTCCTGAAGCCGGC	5	-	653	2148
ENSDARG00000000729	ENSDART00000093181	19	8	6	GACCTCCTCCAGGCTGCTGATGGC	6	-	1150	2148
ENSDARG00000000729	ENSDART00000093181	19	10	8	CTCTCCGGCTTGATCTCTGTGGAC	6	-	1626	2148
ENSDARG00000000729	ENSDART00000093181	19	10	8	AGCTTCAACGTGATTGGAGGAAAC	6	-	1759	2148
ENSDARG00000000729	ENSDART00000093181	19	10	8	GACTTCAGCTAGAGAGTCTGTGTTC	7	-	1722	2148
ENSDARG00000000729	ENSDART00000093181	19	11	9	GTTACCTTATTTTTCTTGGGTGGTG	7	-	2081	2148
ENSDARG00000000729	ENSDART00000093181	19	12	10	CACTTCCTCCGGATCGCATTGTGT	6	-	2113	2148
ENSDARG00000001015	ENSDART00000001148	19	2	2	GGCACCGTCAGCACCGCTGTAGGG	6	-	189	1773
ENSDARG00000001015	ENSDART00000001148	19	2	2	CACCTCCACTCTCCTGCTTTGGCA	6	-	251	1773
ENSDARG00000001015	ENSDART00000001148	19	2	2	CACCTCCACTCTCCTGCTTTGGC	5	-	252	1773
ENSDARG00000001015	ENSDART00000001148	19	2	2	GTCAGCACCGCTGTAGGGTAGTGC	6	-	183	1773
ENSDARG00000001015	ENSDART00000001148	19	2	2	ACCGTCAGCACCGCTGTAGGGTAG	6	-	186	1773
ENSDARG00000001015	ENSDART00000001148	19	2	2	ACCACCTCCACTCTCCTGCTTTGGC	7	-	252	1773
ENSDARG00000001015	ENSDART00000001148	19	3	3	AGAAACAAAAGACTGAGAGGAGGCA	7	-	447	1773
ENSDARG00000001015	ENSDART00000001148	19	3	3	AACAAAAGACTGAGAGGAGGCAGGA	7	-	444	1773
ENSDARG00000001015	ENSDART00000001148	19	3	3	ACAAAAGACTGAGAGGAGGCAGGA	6	-	444	1773
ENSDARG00000001015	ENSDART00000001148	19	4	4	GCCGTCCTCTTTCTTGTCTGTTTAC	7	-	516	1773
ENSDARG00000001015	ENSDART00000001148	19	5	5	CTCATCCTCATCATTGGAGAGGTC	6	-	643	1773
ENSDARG00000001015	ENSDART00000001148	19	7	7	TTATGCTGCTGTAAGTGACTGAGCT	7	-	1051	1773
ENSDARG00000001015	ENSDART00000001148	19	9	9	AAAAGCAGATTTTCAGCAGTTTTT	6	-	1172	1773
ENSDARG00000001015	ENSDART00000001148	19	10	10	AGAGGCCACAGGAATAGAGTTTGGC	7	-	1351	1773
ENSDARG00000001015	ENSDART00000001148	19	11	11	TTCTCCTGCCGACACGGTCTTGTAC	7	-	1659	1773
ENSDARG00000001015	ENSDART00000001148	19	11	11	TGCTGCTGCGGCGGCTGCTGCTGCT	7	-	1548	1773
ENSDARG00000001015	ENSDART00000001148	19	11	11	TGCTGCGGCGGCTGCTGCTGCTGCG	7	-	1545	1773
ENSDARG00000001015	ENSDART00000001148	19	11	11	TGCGGCGGCTGCTGCTGCTGCGGCT	7	-	1542	1773
ENSDARG00000001015	ENSDART00000001148	19	11	11	TCCGTCAGAAACGGAGTAGCTGGT	6	-	1609	1773
ENSDARG00000001015	ENSDART00000001148	19	11	11	GGCTGCTGCTGCTGCGGCTGCTGCT	7	-	1536	1773
ENSDARG00000001015	ENSDART00000001148	19	11	11	GGCGGCTGCTGCTGCTGCGGCTGCT	7	-	1539	1773
ENSDARG00000001015	ENSDART00000001148	19	11	11	GGCGGCTGCTGCTGCTGCGGCTGC	6	-	1540	1773
ENSDARG00000001015	ENSDART00000001148	19	11	11	CGCTGCTGCTGCGGCGGCTGCTGCT	7	-	1551	1773
ENSDARG00000001015	ENSDART00000001148	19	11	11	ATCGGCAACTGTGACCGGCTTGTAC	7	-	1689	1773
ENSDARG00000001015	ENSDART00000086256	19	2	2	GGCACCGTCAGCACCGCTGTAGGG	6	-	162	1593
ENSDARG00000001015	ENSDART00000086256	19	2	2	GTCAGCACCGCTGTAGGGTAGTGC	6	-	156	1593
ENSDARG00000001015	ENSDART00000086256	19	2	2	ACCGTCAGCACCGCTGTAGGGTAG	6	-	159	1593
ENSDARG00000001015	ENSDART00000086256	19	4	4	ACAAAAGACTGAGAGGAGGCAGGA	6	-	351	1593
ENSDARG00000001015	ENSDART00000086256	19	4	4	AGAAACAAAAGACTGAGAGGAGGCA	7	-	354	1593
ENSDARG00000001015	ENSDART00000086256	19	4	4	AACAAAAGACTGAGAGGAGGCAGGA	7	-	351	1593
ENSDARG00000001015	ENSDART00000086256	19	5	5	GCCGTCCTCTTTCTTGTCTGTTTAC	7	-	402	1593
ENSDARG00000001015	ENSDART00000086256	19	6	6	CTCATCCTCATCATTGGAGAGGTC	6	-	598	1593
ENSDARG00000001015	ENSDART00000086256	19	8	8	TTATGCTGCTGTAAGTGACTGAGCT	7	-	1019	1593
ENSDARG00000001015	ENSDART00000086256	19	10	10	AGAGGCCACAGGAATAGAGTTTGGC	7	-	1240	1593
ENSDARG00000001015	ENSDART00000086256	19	11	11	TGCTGCGGCGGCTGCTGCTGCTGCG	7	-	1434	1593
ENSDARG00000001015	ENSDART00000086256	19	11	11	TGCGGCGGCTGCTGCTGCTGCGGCT	7	-	1431	1593
ENSDARG00000001015	ENSDART00000086256	19	11	11	GGCTGCTGCTGCTGCGGCTGCTGCT	7	-	1425	1593
ENSDARG00000001015	ENSDART00000086256	19	11	11	GGCGGCTGCTGCTGCTGCGGCTGCT	7	-	1428	1593
ENSDARG00000001015	ENSDART00000086256	19	11	11	GGCGGCTGCTGCTGCTGCGGCTGC	6	-	1429	1593
ENSDARG00000001015	ENSDART00000086256	19	12	12	ATCGGCAACTGTGACCGGCTTGTAC	7	-	1509	1593
ENSDARG00000001015	ENSDART00000086256	19	12	12	TTCTCCTGCCGACACGGTCTTGTAC	7	-	1479	1593
ENSDARG00000001015	ENSDART00000104891	19	2	2	GGCACCGTCAGCACCGCTGTAGGG	6	-	162	1749
ENSDARG00000001015	ENSDART00000104891	19	2	2	CACCTCCACTCTCCTGCTTTGGCA	6	-	224	1749
ENSDARG00000001015	ENSDART00000104891	19	2	2	CACCTCCACTCTCCTGCTTTGGC	5	-	225	1749
ENSDARG00000001015	ENSDART00000104891	19	2	2	GTCAGCACCGCTGTAGGGTAGTGC	6	-	156	1749
ENSDARG00000001015	ENSDART00000104891	19	2	2	ACCGTCAGCACCGCTGTAGGGTAG	6	-	159	1749
ENSDARG00000001015	ENSDART00000104891	19	2	2	ACCACCTCCACTCTCCTGCTTTGGC	7	-	225	1749
ENSDARG00000001015	ENSDART00000104891	19	3	3	AGAAACAAAAGACTGAGAGGAGGCA	7	-	420	1749
ENSDARG00000001015	ENSDART00000104891	19	3	3	AACAAAAGACTGAGAGGAGGCAGGA	7	-	417	1749
ENSDARG00000001015	ENSDART00000104891	19	3	3	ACAAAAGACTGAGAGGAGGCAGGA	6	-	417	1749
ENSDARG00000001015	ENSDART00000104891	19	4	4	GCCGTCCTCTTTCTTGTCTGTTTAC	7	-	489	1749
ENSDARG00000001015	ENSDART00000104891	19	5	5	CTCATCCTCATCATTGGAGAGGTC	6	-	685	1749
ENSDARG00000001015	ENSDART00000104891	19	7	7	TTATGCTGCTGTAAGTGACTGAGCT	7	-	1106	1749
ENSDARG00000001015	ENSDART00000104891	19	9	9	AGAGGCCACAGGAATAGAGTTTGGC	7	-	1327	1749
ENSDARG00000001015	ENSDART00000104891	19	10	10	TGCTGCTGCGGCGGCTGCTGCTGCT	7	-	1524	1749
ENSDARG00000001015	ENSDART00000104891	19	10	10	TGCTGCGGCGGCTGCTGCTGCTGCG	7	-	1521	1749
ENSDARG00000001015	ENSDART00000104891	19	10	10	TGCGGCGGCTGCTGCTGCTGCGGCT	7	-	1518	1749
ENSDARG00000001015	ENSDART00000104891	19	10	10	TTCTCCTGCCGACACGGTCTTGTAC	7	-	1635	1749
ENSDARG00000001015	ENSDART00000104891	19	10	10	TCCGTCAGAAACGGAGTAGCTGGT	6	-	1585	1749
ENSDARG00000001015	ENSDART00000104891	19	10	10	GGCTGCTGCTGCTGCGGCTGCTGCT	7	-	1512	1749
ENSDARG00000001015	ENSDART00000104891	19	10	10	GGCGGCTGCTGCTGCTGCGGCTGCT	7	-	1515	1749
ENSDARG00000001015	ENSDART00000104891	19	10	10	GGCGGCTGCTGCTGCTGCGGCTGC	6	-	1516	1749
ENSDARG00000001015	ENSDART00000104891	19	10	10	CGCTGCTGCTGCGGCGGCTGCTGCT	7	-	1527	1749
ENSDARG00000001015	ENSDART00000104891	19	10	10	ATCGGCAACTGTGACCGGCTTGTAC	7	-	1665	1749
ENSDARG00000001015	ENSDART00000104892	19	2	2	CACCTCCACTCTCCTGCTTTGGCA	6	-	251	1788
ENSDARG00000001015	ENSDART00000104892	19	2	2	CACCTCCACTCTCCTGCTTTGGC	5	-	252	1788
ENSDARG00000001015	ENSDART00000104892	19	2	2	GTCAGCACCGCTGTAGGGTAGTGC	6	-	183	1788
ENSDARG00000001015	ENSDART00000104892	19	2	2	GGCACCGTCAGCACCGCTGTAGGG	6	-	189	1788
ENSDARG00000001015	ENSDART00000104892	19	2	2	ACCGTCAGCACCGCTGTAGGGTAG	6	-	186	1788
ENSDARG00000001015	ENSDART00000104892	19	2	2	ACCACCTCCACTCTCCTGCTTTGGC	7	-	252	1788
ENSDARG00000001015	ENSDART00000104892	19	3	3	AGAAACAAAAGACTGAGAGGAGGCA	7	-	447	1788
ENSDARG00000001015	ENSDART00000104892	19	3	3	ACAAAAGACTGAGAGGAGGCAGGA	6	-	444	1788
ENSDARG00000001015	ENSDART00000104892	19	3	3	AACAAAAGACTGAGAGGAGGCAGGA	7	-	444	1788
ENSDARG00000001015	ENSDART00000104892	19	4	4	GCCGTCCTCTTTCTTGTCTGTTTAC	7	-	516	1788
ENSDARG00000001015	ENSDART00000104892	19	5	5	CTCATCCTCATCATTGGAGAGGTC	6	-	643	1788
ENSDARG00000001015	ENSDART00000104892	19	8	8	TTATGCTGCTGTAAGTGACTGAGCT	7	-	1066	1788
ENSDARG00000001015	ENSDART00000104892	19	10	10	AAAAGCAGATTTTCAGCAGTTTTT	6	-	1187	1788
ENSDARG00000001015	ENSDART00000104892	19	11	11	AGAGGCCACAGGAATAGAGTTTGGC	7	-	1366	1788
ENSDARG00000001015	ENSDART00000104892	19	12	12	TGCTGCTGCGGCGGCTGCTGCTGCT	7	-	1563	1788
ENSDARG00000001015	ENSDART00000104892	19	12	12	TGCTGCGGCGGCTGCTGCTGCTGCG	7	-	1560	1788
ENSDARG00000001015	ENSDART00000104892	19	12	12	TGCGGCGGCTGCTGCTGCTGCGGCT	7	-	1557	1788
ENSDARG00000001015	ENSDART00000104892	19	12	12	TTCTCCTGCCGACACGGTCTTGTAC	7	-	1674	1788
ENSDARG00000001015	ENSDART00000104892	19	12	12	TCCGTCAGAAACGGAGTAGCTGGT	6	-	1624	1788
ENSDARG00000001015	ENSDART00000104892	19	12	12	GGCTGCTGCTGCTGCGGCTGCTGCT	7	-	1551	1788
ENSDARG00000001015	ENSDART00000104892	19	12	12	GGCGGCTGCTGCTGCTGCGGCTGCT	7	-	1554	1788
ENSDARG00000001015	ENSDART00000104892	19	12	12	GGCGGCTGCTGCTGCTGCGGCTGC	6	-	1555	1788
ENSDARG00000001015	ENSDART00000104892	19	12	12	CGCTGCTGCTGCGGCGGCTGCTGCT	7	-	1566	1788
ENSDARG00000001015	ENSDART00000104892	19	12	12	ATCGGCAACTGTGACCGGCTTGTAC	7	-	1704	1788
ENSDARG00000001169	ENSDART00000001331	19	2	2	GAATCAGCCAATCAGACGCTGGA	5	+	142	771
ENSDARG00000001169	ENSDART00000001331	19	2	2	GTCTTCAAAGGACAGTGTGGAGAA	6	+	219	771
ENSDARG00000001169	ENSDART00000001331	19	2	2	AGATTCGCCACTGAAGGTGCTTCT	6	+	94	771
ENSDARG00000001169	ENSDART00000001331	19	3	3	GAATTCATCCTCAAGATGGAGGA	5	+	319	771
ENSDARG00000001169	ENSDART00000001331	19	3	3	TCCTCAAGATGGAGGAAGACGAC	5	+	326	771
ENSDARG00000001169	ENSDART00000001331	19	3	3	GCCGGCATCACTCAGGATGAATTC	6	+	301	771
ENSDARG00000001169	ENSDART00000001331	19	3	3	GCCTCCATCAGTGTGTGTGAATGC	6	+	276	771
ENSDARG00000001169	ENSDART00000001331	19	3	3	TTCATCCTCAAGATGGAGGAAGAC	6	+	322	771
ENSDARG00000001169	ENSDART00000001331	19	4	4	GACTCAGGCAGTCTCGAAGGCTTT	6	+	393	771
ENSDARG00000001169	ENSDART00000001331	19	5	5	TTACGCCTCTTCTAAAGCAGGAGTA	7	+	498	771
ENSDARG00000001169	ENSDART00000001331	19	7	7	TTATTCCACTGGGAAGAATGGGAG	6	+	656	771
ENSDARG00000001169	ENSDART00000001331	19	8	8	CTATGCAGAAGTAGCTGACGCCTGT	7	+	681	771
ENSDARG00000001303	ENSDART00000001486	19	6	6	GTTGACGACACCACCAGAATAGGCG	7	-	561	663
ENSDARG00000001303	ENSDART00000001486	19	6	6	GACACCACCAGAATAGGCGTCTCT	6	-	556	663
ENSDARG00000001303	ENSDART00000001486	19	6	6	ACATCCGACCAGACAGACGAGTGC	6	-	413	663
ENSDARG00000001303	ENSDART00000001486	19	7	7	AACATCCCCTTCTTGTAGCGGTG	5	-	649	663
ENSDARG00000001303	ENSDART00000104838	19	5	5	GTTGACGACACCACCAGAATAGGCG	7	-	711	813
ENSDARG00000001303	ENSDART00000104838	19	5	5	GACACCACCAGAATAGGCGTCTCT	6	-	706	813
ENSDARG00000001303	ENSDART00000104838	19	5	5	ACATCCGACCAGACAGACGAGTGC	6	-	563	813
ENSDARG00000001303	ENSDART00000104838	19	6	6	AACATCCCCTTCTTGTAGCGGTG	5	-	799	813
ENSDARG00000001558	ENSDART00000001804	19	3	2	AACAACAACAGCCTGCGCAGGTTTG	7	+	83	1854
ENSDARG00000001558	ENSDART00000001804	19	3	2	AACAACAGCCTGCGCAGGTTTGTTT	7	+	86	1854
ENSDARG00000001558	ENSDART00000001804	19	3	2	CACACCAACAGCACTGATGGGGAA	6	+	61	1854
ENSDARG00000001558	ENSDART00000001804	19	4	3	CCCCCAAGACGTCCTGTAGCAGTC	6	+	166	1854
ENSDARG00000001558	ENSDART00000001804	19	4	3	CCCCAAGACGTCCTGTAGCAGTC	5	+	167	1854
ENSDARG00000001558	ENSDART00000001804	19	4	3	AGATGCGCAAGGTGGAGGTAGAG	5	+	107	1854
ENSDARG00000001558	ENSDART00000001804	19	5	4	CTCTACGTCCAACTGGAGCTGCA	5	+	206	1854
ENSDARG00000001558	ENSDART00000001804	19	5	4	TGCTGCTCCTGCAAGAGGTATTG	5	+	237	1854
ENSDARG00000001558	ENSDART00000001804	19	9	8	GACCTCTGCGTTGGGCCGGTGTC	5	+	672	1854
ENSDARG00000001558	ENSDART00000001804	19	11	10	TTCAGCTTCGACCGTGTGTTTGGTC	7	+	985	1854
ENSDARG00000001558	ENSDART00000001804	19	11	10	TTCAGCTTCGACCGTGTGTTTGGT	6	+	985	1854
ENSDARG00000001558	ENSDART00000001804	19	12	11	CAAAAAGTCAACAATGAGGATGAG	6	+	1369	1854
ENSDARG00000001558	ENSDART00000001804	19	12	11	AAAGTCAACAATGAGGATGAGGTA	6	+	1372	1854
ENSDARG00000001558	ENSDART00000001804	19	12	11	AAAGTCAACAATGAGGATGAGGT	5	+	1372	1854
ENSDARG00000001558	ENSDART00000001804	19	14	13	TCCTCCCTCACCAACCTGGGAATTG	7	+	1624	1854
ENSDARG00000001558	ENSDART00000001804	19	14	13	TCCCTCACCAACCTGGGAATTGTAA	7	+	1627	1854
ENSDARG00000001558	ENSDART00000001804	19	14	13	CCCTCACCAACCTGGGAATTGTAA	6	+	1628	1854
ENSDARG00000001559	ENSDART00000001805	19	1	1	GTCTCAGCCAGTTCTTGCTGCTGAT	7	-	40	9852
ENSDARG00000001559	ENSDART00000001805	19	1	1	GTTTCCATCTGATGTGAAGTGGAG	6	-	64	9852
ENSDARG00000001559	ENSDART00000001805	19	3	3	GAAATCAGAGCCTTTTCTTTTGCC	6	-	262	9852
ENSDARG00000001559	ENSDART00000001805	19	5	5	GACCACCACACATGGGAGCTGAA	5	-	408	9852
ENSDARG00000001559	ENSDART00000001805	19	6	6	GCCGTCTCCAACAGTTAGCGTGT	5	-	581	9852
ENSDARG00000001559	ENSDART00000001805	19	6	6	ACCGTCCGCTGATCGCCGATTAC	5	-	607	9852
ENSDARG00000001559	ENSDART00000001805	19	7	7	TTAAGCCACATCTGATGACTAGTGC	7	-	674	9852
ENSDARG00000001559	ENSDART00000001805	19	10	10	GTTTCCATCTTTGAGGATGCAGGA	6	-	1399	9852
ENSDARG00000001559	ENSDART00000001805	19	13	13	GGCGACTCCACTGGAAGTTTGGTTC	7	-	1930	9852
ENSDARG00000001559	ENSDART00000001805	19	13	13	ACCATCGCAGCTGGGCAGGGGGC	5	-	1952	9852
ENSDARG00000001559	ENSDART00000001805	19	14	14	GTCTCAATCATCCAGGTGCAGTT	5	-	2053	9852
ENSDARG00000001559	ENSDART00000001805	19	16	16	ACCAACACACCTTGGCAGAGGGG	5	-	2474	9852
ENSDARG00000001559	ENSDART00000001805	19	16	16	TACCAACACACCTTGGCAGAGGGG	6	-	2474	9852
ENSDARG00000001559	ENSDART00000001805	19	16	16	CAACACACCTTGGCAGAGGGGAAC	6	-	2471	9852
ENSDARG00000001559	ENSDART00000001805	19	16	16	AGACCCTTACGAGTGCTGAAGGG	5	-	2344	9852
ENSDARG00000001559	ENSDART00000001805	19	17	17	AACACCTTAAGCATGTCGTCTTC	5	-	2647	9852
ENSDARG00000001559	ENSDART00000001805	19	18	18	AGCTCAAACCCTTTGCTGGTGTT	5	-	2788	9852
ENSDARG00000001559	ENSDART00000001805	19	18	18	AACTCAAGCCACATGGAGCTGGA	5	-	2749	9852
ENSDARG00000001559	ENSDART00000001805	19	19	19	ACCCACACACTGTGGGAGAGGAC	5	-	2993	9852
ENSDARG00000001559	ENSDART00000001805	19	19	19	TTACCCACACACTGTGGGAGAGGAC	7	-	2993	9852
ENSDARG00000001559	ENSDART00000001805	19	19	19	TACCCACACACTGTGGGAGAGGAC	6	-	2993	9852
ENSDARG00000001559	ENSDART00000001805	19	20	20	TCCCTCCACACTCGGCTGGGTAA	5	-	3006	9852
ENSDARG00000001559	ENSDART00000001805	19	21	21	AGCAAATCCCTGCTTGCTGGTGAA	6	-	3307	9852
ENSDARG00000001559	ENSDART00000001805	19	24	24	GACAAATCCATTGCTGCTGAGTG	5	-	3818	9852
ENSDARG00000001559	ENSDART00000001805	19	24	24	AGCTGCCCAGCAGTGGACTGAGAG	6	-	3719	9852
ENSDARG00000001559	ENSDART00000001805	19	25	25	CTATGCAAACAGGTTTTGGTTTG	5	-	4026	9852
ENSDARG00000001559	ENSDART00000001805	19	25	25	CTATGCAAACAGGTTTTGGTTTGTT	7	-	4024	9852
ENSDARG00000001559	ENSDART00000001805	19	25	25	TACCTATGCAAACAGGTTTTGGT	5	-	4029	9852
ENSDARG00000001559	ENSDART00000001805	19	25	25	TACCTATGCAAACAGGTTTTGGTT	6	-	4028	9852
ENSDARG00000001559	ENSDART00000001805	19	26	26	CAAGTCCTCCCACTGCTGTAGTT	5	-	4111	9852
ENSDARG00000001559	ENSDART00000001805	19	32	32	ACCGGCTGCAGAGACGCTGATGTC	6	-	4828	9852
ENSDARG00000001559	ENSDART00000001805	19	32	32	GAAACCGGCTGCAGAGACGCTGAT	6	-	4831	9852
ENSDARG00000001559	ENSDART00000001805	19	35	35	GCAGTCGCCGTTGCTAGGGTAGTTT	7	-	5121	9852
ENSDARG00000001559	ENSDART00000001805	19	35	35	TCCCTCCACACTGAGCTGGAGGA	5	-	5052	9852
ENSDARG00000001559	ENSDART00000001805	19	37	37	CACCACACCATTATGGAAGGGTTC	6	-	5416	9852
ENSDARG00000001559	ENSDART00000001805	19	38	38	GCCAGCTGCAATCCGCAGATGTG	5	-	5646	9852
ENSDARG00000001559	ENSDART00000001805	19	42	42	ACCTTCACCAACCAGGAGCAGGA	5	-	6181	9852
ENSDARG00000001559	ENSDART00000001805	19	48	48	AAACAACACTGCCTCTGTAGTTGTA	7	-	7234	9852
ENSDARG00000001559	ENSDART00000001805	19	48	48	GTAAACAACACTGCCTCTGTAGTT	6	-	7237	9852
ENSDARG00000001559	ENSDART00000001805	19	48	48	CAACACTGCCTCTGTAGTTGTAGTT	7	-	7231	9852
ENSDARG00000001559	ENSDART00000001805	19	48	48	CACTGCCTCTGTAGTTGTAGTTTTC	7	-	7228	9852
ENSDARG00000001559	ENSDART00000001805	19	49	49	TGCGTCACACCATTAGCAGGAGTG	6	-	7374	9852
ENSDARG00000001559	ENSDART00000001805	19	49	49	AAACGCACAATATCATTTAGGTTAA	7	-	7409	9852
ENSDARG00000001559	ENSDART00000001805	19	51	51	CAATGCTGCGCTGGCCGATGCAGCT	7	-	7798	9852
ENSDARG00000001559	ENSDART00000001805	19	55	55	TTCCACTGCCCTGGCAGGTGAGGAT	7	-	8548	9852
ENSDARG00000001559	ENSDART00000001805	19	56	56	GACCTATGCAAGAAGGCTGGGTTC	6	-	8756	9852
ENSDARG00000001559	ENSDART00000001805	19	56	56	GACCTATGCAAGAAGGCTGGGTT	5	-	8757	9852
ENSDARG00000001559	ENSDART00000001805	19	56	56	TCCTCCCTCTTCCCCTGGGCTGGA	6	-	8628	9852
ENSDARG00000001559	ENSDART00000001805	19	56	56	GCCAACTAAAATCAAAGGCGGGTAA	7	-	8691	9852
ENSDARG00000001559	ENSDART00000001805	19	56	56	CTCCACAAAATACAGCTGCAGAG	5	-	8595	9852
ENSDARG00000001559	ENSDART00000001805	19	58	58	AACCTATGCACTCAGGCTGCATGC	6	-	8942	9852
ENSDARG00000001559	ENSDART00000001805	19	61	61	ACACTCACCAGCCAGATTGAGCT	5	-	9356	9852
ENSDARG00000001559	ENSDART00000001805	19	61	61	TTATGCTAAGCATTGCTGGCTGC	5	-	9273	9852
ENSDARG00000001559	ENSDART00000001805	19	62	62	ACCTGCAGCAGCAACTGGGCTTCT	6	-	9387	9852
ENSDARG00000001572	ENSDART00000001821	19	1	1	GTCTTCATCTGCACGATGTTGAA	5	-	127	1608
ENSDARG00000001572	ENSDART00000001821	19	1	1	GAAGGCAAAGGGAAGGGAGAAGAG	6	-	28	1608
ENSDARG00000001572	ENSDART00000001821	19	1	1	GTTGTCACAGGCAGTGCAGTTGCC	6	-	202	1608
ENSDARG00000001572	ENSDART00000001821	19	1	1	CACCACAAACGCTCCGGTGGTCTTC	7	-	144	1608
ENSDARG00000001572	ENSDART00000001821	19	1	1	TTCATCTGCACGATGTTGAAGCC	5	-	124	1608
ENSDARG00000001572	ENSDART00000001821	19	1	1	TTCTGCTTCTGGTTGAGCAGCTTGT	7	-	224	1608
ENSDARG00000001572	ENSDART00000001821	19	1	1	GGCAACTTCTGCTTCTGGTTGAGCA	7	-	230	1608
ENSDARG00000001572	ENSDART00000001821	19	2	2	TGCTTCTTCTAGCGGAGTCGTTTCT	7	-	1015	1608
ENSDARG00000001572	ENSDART00000001821	19	2	2	GTCTGCGCCGTGTGGCTGCCGTA	5	-	1282	1608
ENSDARG00000001572	ENSDART00000001821	19	2	2	GCCTCCGCCGATAAGCAGTTGCT	5	-	736	1608
ENSDARG00000001572	ENSDART00000001821	19	2	2	GACTGCTTCTTCTAGCGGAGTCGTT	7	-	1018	1608
ENSDARG00000001572	ENSDART00000001821	19	2	2	TGCCTCCGCCGATAAGCAGTTGCT	6	-	736	1608
ENSDARG00000001572	ENSDART00000001821	19	3	3	AACACCATCACCACCTGGGGTAGGA	7	-	1572	1608
ENSDARG00000001572	ENSDART00000001821	19	3	3	TTCGGCACATTGACGCCTTTTTC	5	-	1459	1608
ENSDARG00000001572	ENSDART00000001821	19	3	3	ACCATCACCACCTGGGGTAGGAG	5	-	1571	1608
ENSDARG00000001572	ENSDART00000001821	19	3	3	ACCATCACCACCTGGGGTAGGAGCG	7	-	1569	1608
ENSDARG00000001572	ENSDART00000001821	19	3	3	CGCTTCGGCACATTGACGCCTTT	5	-	1462	1608
ENSDARG00000001656	ENSDART00000001930	19	2	2	CACTCCAGCAATGGTTGTGCCTGT	6	-	136	843
ENSDARG00000001656	ENSDART00000001930	19	3	3	AGCAACTACTTCATCAGAGGTGGCT	7	-	198	843
ENSDARG00000001656	ENSDART00000001930	19	3	3	AACTACTTCATCAGAGGTGGCTCT	6	-	196	843
ENSDARG00000001656	ENSDART00000001930	19	4	4	GTCTTCTCCGTGTCCGCAGCTGTT	6	-	282	843
ENSDARG00000001656	ENSDART00000001930	19	5	5	CAACGCCTCCTAAAATTAGATTAG	6	-	428	843
ENSDARG00000001656	ENSDART00000001930	19	5	5	AACGCCTCCTAAAATTAGATTAG	5	-	428	843
ENSDARG00000001710	ENSDART00000001995	19	4	4	GGCTGCAGCGTGTCAGATGTTTTT	6	+	252	1314
ENSDARG00000001710	ENSDART00000001995	19	6	6	TACTGCACAAGTGCAGAAGGATGC	6	+	513	1314
ENSDARG00000001710	ENSDART00000001995	19	7	7	GTCTTCACCAAAAAAGCGGAATCT	6	+	688	1314
ENSDARG00000001710	ENSDART00000001995	19	7	7	AGAGACTACGAGCTGAAGAAGGC	5	+	649	1314
ENSDARG00000001710	ENSDART00000001995	19	7	7	GGCTCATGCTATGCAGGAGAAGGT	6	+	582	1314
ENSDARG00000001710	ENSDART00000001995	19	7	7	GCCATCTACGACATTGAGGTCTTC	6	+	670	1314
ENSDARG00000001710	ENSDART00000001995	19	8	8	GACAAAGCAGCGGATCGAGGAGGAG	7	+	741	1314
ENSDARG00000001710	ENSDART00000001995	19	8	8	CGCAACAAATCACGCTGCAGGAGCA	7	+	794	1314
ENSDARG00000001710	ENSDART00000001995	19	8	8	CAACAAATCACGCTGCAGGAGCA	5	+	796	1314
ENSDARG00000001710	ENSDART00000001995	19	8	8	CAAAGCAGCGGATCGAGGAGGAGAA	7	+	743	1314
ENSDARG00000001710	ENSDART00000001995	19	8	8	CAAAGCAGCGGATCGAGGAGGAG	5	+	743	1314
ENSDARG00000001710	ENSDART00000001995	19	10	10	AGAGGCAGAAGCGTACGCTGTGGAG	7	+	969	1314
ENSDARG00000001710	ENSDART00000001995	19	11	11	TGCTGCTAAACTGACAGGCGAAGTC	7	+	1176	1314
ENSDARG00000001710	ENSDART00000104894	19	3	3	GGCTGCAGCGTGTCAGATGTTTTT	6	+	222	873
ENSDARG00000001710	ENSDART00000104894	19	5	5	TACTGCACAAGTGCAGAAGGATGC	6	+	483	873
ENSDARG00000001710	ENSDART00000104894	19	6	6	GGCTCATGCTATGCAGGAGAAGGT	6	+	552	873
ENSDARG00000001710	ENSDART00000104894	19	6	6	GTCTTCACCAAAAAAGCGGAATCT	6	+	658	873
ENSDARG00000001710	ENSDART00000104894	19	6	6	AGAGACTACGAGCTGAAGAAGGC	5	+	619	873
ENSDARG00000001710	ENSDART00000104894	19	6	6	GCCATCTACGACATTGAGGTCTTC	6	+	640	873
ENSDARG00000001710	ENSDART00000104894	19	7	7	GACAAAGCAGCGGATCGAGGAGGAG	7	+	711	873
ENSDARG00000001710	ENSDART00000104894	19	7	7	CGCAACAAATCACGCTGCAGGAGCA	7	+	764	873
ENSDARG00000001710	ENSDART00000104894	19	7	7	CAACAAATCACGCTGCAGGAGCA	5	+	766	873
ENSDARG00000001710	ENSDART00000104894	19	7	7	CAAAGCAGCGGATCGAGGAGGAGAA	7	+	713	873
ENSDARG00000001710	ENSDART00000104894	19	7	7	CAAAGCAGCGGATCGAGGAGGAG	5	+	713	873
ENSDARG00000001784	ENSDART00000003506	19	1	1	GACAGCTTCACAGAATGTGTCGGA	6	+	486	795
ENSDARG00000001784	ENSDART00000003506	19	1	1	CTCTGCGTCCAAAAGCTTTGGAA	5	+	390	795
ENSDARG00000001784	ENSDART00000003506	19	1	1	CTCCCCTGCTCATCCTTAGCCAAC	6	+	307	795
ENSDARG00000001784	ENSDART00000003506	19	1	1	AGCTTCACAGAATGTGTCGGAGGC	6	+	489	795
ENSDARG00000001784	ENSDART00000003506	19	1	1	AGAAAAGCCACCGGGTAGTGGAC	5	+	462	795
ENSDARG00000002013	ENSDART00000042172	19	4	4	CAACTCTTCTTCTTGAAGTCGCC	5	-	398	1806
ENSDARG00000002013	ENSDART00000042172	19	4	4	CTCTTCTTCTTGAAGTCGCCTAC	5	-	395	1806
ENSDARG00000002013	ENSDART00000042172	19	5	5	TTCCCACACCATCCTCGCTGAAAAC	7	-	544	1806
ENSDARG00000002013	ENSDART00000042172	19	5	5	TCCCACACCATCCTCGCTGAAAAC	6	-	544	1806
ENSDARG00000002013	ENSDART00000042172	19	5	5	ACCCAAACCAAGCAAGGAATGATGC	7	-	669	1806
ENSDARG00000002013	ENSDART00000042172	19	5	5	CCCAAACCAAGCAAGGAATGATGC	6	-	669	1806
ENSDARG00000002013	ENSDART00000042172	19	9	9	CTCACCTTAATGCAGAATTGGTA	5	-	1114	1806
ENSDARG00000002013	ENSDART00000042172	19	10	10	GCAGTCATCCAGCATGTGCGGCTCT	7	-	1190	1806
ENSDARG00000002013	ENSDART00000042172	19	10	10	GCAGTCATCCAGCATGTGCGGCT	5	-	1192	1806
ENSDARG00000002013	ENSDART00000042172	19	11	11	GTCTTCCTCTGGTGGGGGGTCTTG	6	-	1257	1806
ENSDARG00000002013	ENSDART00000042172	19	16	16	GGCCACCACGGTGCAGGGGTGTTT	6	-	1789	1806
ENSDARG00000002046	ENSDART00000043161	19	2	2	AGCTCCAGCGGTCTCTGGTGTGTCT	7	-	437	1530
ENSDARG00000002046	ENSDART00000043161	19	2	2	CCCGTCACCTTTAAATGAGGCTGCA	7	-	356	1530
ENSDARG00000002046	ENSDART00000043161	19	3	3	CTCTTCTGCAGATCTCTCTGTGTCT	7	-	578	1530
ENSDARG00000002046	ENSDART00000043161	19	7	7	TCCATCATCAGACAGGATGAGTTC	6	-	1030	1530
ENSDARG00000002046	ENSDART00000043161	19	7	7	TCCATCATCAGACAGGATGAGTT	5	-	1031	1530
ENSDARG00000002046	ENSDART00000043161	19	7	7	ACAAACACACCGACCCGCTGCGGAC	7	-	1343	1530
ENSDARG00000002046	ENSDART00000043161	19	7	7	AAACACACCGACCCGCTGCGGAC	5	-	1343	1530
ENSDARG00000002046	ENSDART00000103166	19	2	2	CCCGTCACCTTTAAATGAGGCTGCA	7	-	356	1509
ENSDARG00000002046	ENSDART00000103166	19	2	2	AGCTCCAGCGGTCTCTGGTGTGTCT	7	-	437	1509
ENSDARG00000002046	ENSDART00000103166	19	3	3	CTCTTCTGCAGATCTCTCTGTGTCT	7	-	578	1509
ENSDARG00000002046	ENSDART00000103166	19	7	7	AAACACATCGATTTTTAAGTCTGT	6	-	1016	1509
ENSDARG00000002046	ENSDART00000103166	19	8	8	ACAAACACACCGACCCGCTGCGGAC	7	-	1322	1509
ENSDARG00000002046	ENSDART00000103166	19	8	8	AAACACACCGACCCGCTGCGGAC	5	-	1322	1509
ENSDARG00000002457	ENSDART00000052327	19	1	1	ACCCAAACAAGTCCTGTCTGCTTGC	7	-	326	927
ENSDARG00000002457	ENSDART00000052327	19	1	1	ATCCTCTGCAGCAGAGGTGACTCT	6	-	117	927
ENSDARG00000002457	ENSDART00000052327	19	1	1	CACAAAGACACGGTGGTTGGAAC	5	-	413	927
ENSDARG00000002457	ENSDART00000052327	19	1	1	TGCCGCTGCAAGATGCTGTGGTTGC	7	-	581	927
ENSDARG00000002457	ENSDART00000052327	19	1	1	TGCCGCTGCAAGATGCTGTGGTT	5	-	583	927
ENSDARG00000002457	ENSDART00000052327	19	2	2	TTACACAGCCTGGAGGTGTGTTT	5	-	670	927
ENSDARG00000002457	ENSDART00000052327	19	2	2	CCCCAAACCATCTCGATTGGGTT	5	-	742	927
ENSDARG00000002457	ENSDART00000052327	19	2	2	CACCCCAAACCATCTCGATTGGGTT	7	-	742	927
ENSDARG00000002457	ENSDART00000052327	19	2	2	ACCCCAAACCATCTCGATTGGGTT	6	-	742	927
ENSDARG00000002549	ENSDART00000023926	19	3	3	GGCCACCACTGTGGTTCTTTTGTC	6	-	226	1341
ENSDARG00000002549	ENSDART00000023926	19	9	9	TGCTTCCCAATTCTGCATGAGGA	5	-	545	1341
ENSDARG00000002549	ENSDART00000023926	19	9	9	TCCCAATTCTGCATGAGGATTTC	5	-	541	1341
ENSDARG00000002549	ENSDART00000023926	19	10	10	CTCTGCTGCAGTGACTGAAGAGGCG	7	-	623	1341
ENSDARG00000002549	ENSDART00000023926	19	12	12	CACTCCACAAACTCGGTGATGGG	5	-	886	1341
ENSDARG00000002549	ENSDART00000023926	19	12	12	ACACTCCACAAACTCGGTGATGGG	6	-	886	1341
ENSDARG00000002549	ENSDART00000023926	19	14	14	CACTCACCAGTTTGGAGTCGATTTT	7	-	1162	1341
ENSDARG00000002549	ENSDART00000023926	19	15	15	TACGGCGACACTGCGTTGTTGCC	5	-	1195	1341
ENSDARG00000002549	ENSDART00000064209	19	3	3	GGCCACCACTGTGGTTCTTTTGTC	6	-	226	1203
ENSDARG00000002549	ENSDART00000064209	19	6	6	TCCCAATTCTGCATGAGGATTTC	5	-	538	1203
ENSDARG00000002549	ENSDART00000064209	19	6	6	TGCTTCCCAATTCTGCATGAGGA	5	-	542	1203
ENSDARG00000002549	ENSDART00000064209	19	9	9	CACTCCACAAACTCGGTGATGGG	5	-	862	1203
ENSDARG00000002549	ENSDART00000064209	19	9	9	ACACTCCACAAACTCGGTGATGGG	6	-	862	1203
ENSDARG00000002549	ENSDART00000064209	19	11	11	CACTCACCAGTTTGGAGTCGATTTT	7	-	1138	1203
ENSDARG00000002549	ENSDART00000064209	19	12	12	TTCTGCGGCTGTACCGTGGGAGCT	6	-	1178	1203
ENSDARG00000002549	ENSDART00000080311	19	3	3	GGCCACCACTGTGGTTCTTTTGTC	6	-	226	1338
ENSDARG00000002549	ENSDART00000080311	19	6	6	TGCTTCCCAATTCTGCATGAGGA	5	-	542	1338
ENSDARG00000002549	ENSDART00000080311	19	6	6	TCCCAATTCTGCATGAGGATTTC	5	-	538	1338
ENSDARG00000002549	ENSDART00000080311	19	7	7	CTCTGCTGCAGTGACTGAAGAGGCG	7	-	620	1338
ENSDARG00000002549	ENSDART00000080311	19	9	9	CACTCCACAAACTCGGTGATGGG	5	-	883	1338
ENSDARG00000002549	ENSDART00000080311	19	9	9	ACACTCCACAAACTCGGTGATGGG	6	-	883	1338
ENSDARG00000002549	ENSDART00000080311	19	11	11	CACTCACCAGTTTGGAGTCGATTTT	7	-	1159	1338
ENSDARG00000002549	ENSDART00000080311	19	12	12	TACGGCGACACTGCGTTGTTGCC	5	-	1192	1338
ENSDARG00000002610	ENSDART00000009689	19	3	2	AACTTCTGCCCAATGCAGATGGA	5	+	314	609
ENSDARG00000002610	ENSDART00000009689	19	4	3	GTAGTCGCAGCTGTTCTGCTGGT	5	+	493	609
ENSDARG00000002610	ENSDART00000018525	19	3	3	AACTTCTGCCCAATGCAGATGGA	5	+	338	408
ENSDARG00000002610	ENSDART00000081890	19	1	1	TACTGCTGCTGGTTGTCTGTCTAC	6	+	20	1038
ENSDARG00000002610	ENSDART00000081890	19	1	1	ACATACTGCTGCTGGTTGTCTGT	5	+	17	1038
ENSDARG00000002610	ENSDART00000081890	19	2	2	CACTGCAACAACTGGATTGAGTC	5	+	84	1038
ENSDARG00000002610	ENSDART00000081890	19	4	4	AACTTCTGCCCAATGCAGATGGA	5	+	737	1038
ENSDARG00000002610	ENSDART00000104852	19	1	1	AAAAAATGCAGTCGCTAATAGGTC	6	+	5	1044
ENSDARG00000002610	ENSDART00000104852	19	1	1	GTCTGCTGCTAGTCGTCTGTCTAC	6	+	26	1044
ENSDARG00000002610	ENSDART00000104852	19	4	4	ATCTTCTTCTTCTCCAGTCGTGTGT	7	+	630	1044
ENSDARG00000002610	ENSDART00000104852	19	5	5	GTAGTCGCAGCTGTTCTGCTGGT	5	+	928	1044
ENSDARG00000002610	ENSDART00000104855	19	3	3	AACTTCTGCCCAATGCAGATGGA	5	+	449	684
ENSDARG00000002610	ENSDART00000104855	19	4	4	GTAGTCGCAGCTGTTCTGCTGGT	5	+	628	684
ENSDARG00000002610	ENSDART00000104861	19	1	1	ACATACTGCTGCTGGTTGTCTGT	5	+	17	1059
ENSDARG00000002610	ENSDART00000104861	19	1	1	TACTGCTGCTGGTTGTCTGTCTAC	6	+	20	1059
ENSDARG00000002610	ENSDART00000104861	19	2	2	CACTGCAACAACTGGATTGAGTC	5	+	84	1059
ENSDARG00000002610	ENSDART00000104861	19	4	4	AACTTCTGCCCAATGCAGATGGA	5	+	737	1059
ENSDARG00000002610	ENSDART00000104863	19	1	1	TACTGCTGCTGGTTGTCTGTCTAC	6	+	50	1248
ENSDARG00000002610	ENSDART00000104863	19	1	1	ACATACTGCTGCTGGTTGTCTGT	5	+	47	1248
ENSDARG00000002610	ENSDART00000104863	19	2	2	CACTGCAACAACTGGATTGAGTC	5	+	114	1248
ENSDARG00000002610	ENSDART00000104863	19	4	4	AACTTCTGCCCAATGCAGATGGA	5	+	767	1248
ENSDARG00000002610	ENSDART00000104863	19	7	7	TGCAGCTTCTGACTCAGTTGCTGAA	7	+	1032	1248
ENSDARG00000002610	ENSDART00000104863	19	8	8	ACATCAGACATCAGCTCTGTTTGC	6	+	1143	1248
ENSDARG00000002610	ENSDART00000104863	19	8	8	TACATCAGACATCAGCTCTGTTTGC	7	+	1142	1248
ENSDARG00000002613	ENSDART00000018553	19	2	2	ACATCCATCAGGAAAGGTTTTTAC	6	+	111	363
ENSDARG00000002613	ENSDART00000018553	19	4	4	TCCTCAGCATTACCCATTTGAAGTG	7	+	336	363
ENSDARG00000002614	ENSDART00000020859	19	2	2	GAATCACACACAGTGTGGGAAGCT	6	+	119	1203
ENSDARG00000002614	ENSDART00000020859	19	4	4	TACAACACAAAGAAGCAGAATTC	5	+	431	1203
ENSDARG00000002614	ENSDART00000020859	19	4	4	GTACAACACAAAGAAGCAGAATTC	6	+	430	1203
ENSDARG00000002614	ENSDART00000020859	19	5	5	CTCTACTGCGTTCAGGCTGATGGG	6	+	529	1203
ENSDARG00000002614	ENSDART00000020859	19	6	6	GGCATCTACGGCAGTGCCTGATAC	6	+	861	1203
ENSDARG00000002614	ENSDART00000020859	19	9	9	CTCTGCTGCATGATGGGGTATGT	5	+	1118	1203
ENSDARG00000002614	ENSDART00000020859	19	10	10	GTTTCCAGAAATTTATGTGTAGCA	6	+	1175	1203
ENSDARG00000002614	ENSDART00000078358	19	5	4	GAATCACACACAGTGTGGGAAGCT	6	+	215	1680
ENSDARG00000002614	ENSDART00000078358	19	7	6	TACAACACAAAGAAGCAGAATTC	5	+	527	1680
ENSDARG00000002614	ENSDART00000078358	19	7	6	GTACAACACAAAGAAGCAGAATTC	6	+	526	1680
ENSDARG00000002614	ENSDART00000078358	19	8	7	CTCTACTGCGTTCAGGCTGATGGG	6	+	625	1680
ENSDARG00000002614	ENSDART00000078358	19	9	8	GGCATCTACGGCAGTGCCTGATAC	6	+	957	1680
ENSDARG00000002614	ENSDART00000078358	19	11	10	CTCTGCTGCATGATGGGGTATGT	5	+	1196	1680
ENSDARG00000002614	ENSDART00000078358	19	12	11	GTTTCCAGAAATTTATGTGTAGCA	6	+	1253	1680
ENSDARG00000002614	ENSDART00000078358	19	13	12	TTCTCCCTCAAAGAGAAGCCGCT	5	+	1305	1680
ENSDARG00000002614	ENSDART00000078358	19	13	12	GAACTAACCCAGTCGCAGCTGTG	5	+	1408	1680
ENSDARG00000002614	ENSDART00000078358	19	13	12	TCCCTCAAAGAGAAGCCGCTTAG	5	+	1308	1680
ENSDARG00000002614	ENSDART00000078358	19	13	12	CAACAATCCCTTCCTGTAGCAGCA	6	+	1384	1680
ENSDARG00000002614	ENSDART00000078358	19	13	12	AACCCAGTCGCAGCTGTGGAGCA	5	+	1413	1680
ENSDARG00000002614	ENSDART00000078358	19	14	13	TCCTCAACAGGTTGCTGAAGATGAT	7	+	1488	1680
ENSDARG00000002614	ENSDART00000078358	19	14	13	TGCTTCCTCAACAGGTTGCTGAA	5	+	1484	1680
ENSDARG00000002614	ENSDART00000078358	19	14	13	TTCCTCAACAGGTTGCTGAAGAT	5	+	1487	1680
ENSDARG00000002614	ENSDART00000078358	19	15	14	CTCAGCCGCAGCAGTGTAGCTGGT	6	+	1591	1680
ENSDARG00000002696	ENSDART00000005547	19	3	2	CACCAATGCATGGCGTAGATTTT	5	-	178	1017
ENSDARG00000002696	ENSDART00000005547	19	3	2	AGCCACTCCAGCAGCGGCTGCCGCC	7	-	99	1017
ENSDARG00000002696	ENSDART00000005547	19	4	3	AGCATCCCAGATGAGAAGTTTGC	5	-	239	1017
ENSDARG00000002696	ENSDART00000005547	19	4	3	ATCACCTTATTTCCAGAGTGAGCA	6	-	258	1017
ENSDARG00000002696	ENSDART00000005547	19	7	6	AGAGACAGACACATGCAGTCGCC	5	-	559	1017
ENSDARG00000002880	ENSDART00000017917	19	1	1	GTCCTCGACTGTTCGATGCAGAA	5	+	25	2913
ENSDARG00000002880	ENSDART00000017917	19	2	2	AAAGTCCTCAGGAAAGTGTGGTTG	6	+	80	2913
ENSDARG00000002880	ENSDART00000017917	19	5	5	AGAAACAGCCCTCCTATGTGAAGGT	7	+	368	2913
ENSDARG00000002880	ENSDART00000017917	19	6	6	TGCAAACCAATCTGCAGCTGGCTGC	7	+	413	2913
ENSDARG00000002880	ENSDART00000017917	19	6	6	CACTGCAAACCAATCTGCAGCTGGC	7	+	410	2913
ENSDARG00000002880	ENSDART00000017917	19	9	9	AAACACTACAACTGTATAAGGTGAG	7	+	679	2913
ENSDARG00000002880	ENSDART00000017917	19	11	11	TACACCAAAGTTCAGCTGGCGTA	5	+	796	2913
ENSDARG00000002880	ENSDART00000017917	19	12	12	ACCGTCTTCCAGGTGGTGCTGGGAT	7	+	889	2913
ENSDARG00000002880	ENSDART00000017917	19	12	12	ACCGTCTTCCAGGTGGTGCTGGG	5	+	889	2913
ENSDARG00000002880	ENSDART00000017917	19	12	12	AACACCGTCTTCCAGGTGGTGCT	5	+	886	2913
ENSDARG00000002880	ENSDART00000017917	19	14	14	GTAGGCTAATGGATGTCTGCCGTG	6	+	1004	2913
ENSDARG00000002880	ENSDART00000017917	19	16	16	CGCAGCTACGTGAAGAAGAAGCT	5	+	1147	2913
ENSDARG00000002880	ENSDART00000017917	19	16	16	GGCCGCAGCTACGTGAAGAAGAA	5	+	1144	2913
ENSDARG00000002880	ENSDART00000017917	19	17	17	TACGACGACTTCATTGTGGTTCT	5	+	1255	2913
ENSDARG00000002880	ENSDART00000017917	19	17	17	TCCAACTTCAAGTACGACGACTTC	6	+	1243	2913
ENSDARG00000002880	ENSDART00000017917	19	18	18	TTCTGCGGCAGTAAGTCTGAGGTG	6	+	1315	2913
ENSDARG00000002880	ENSDART00000017917	19	18	18	TTCTGCGGCAGTAAGTCTGAGGT	5	+	1315	2913
ENSDARG00000002880	ENSDART00000017917	19	20	20	GAATCCACAGATCTGCTGGAGCT	5	+	1540	2913
ENSDARG00000002880	ENSDART00000017917	19	20	20	AGAATCCACAGATCTGCTGGAGCT	6	+	1539	2913
ENSDARG00000002880	ENSDART00000017917	19	22	22	ACCCTCAACGTGATCCGCCTAGTTG	7	+	1861	2913
ENSDARG00000002880	ENSDART00000017917	19	24	24	AGAGCCTAATAGACATGGTGAGTA	6	+	2072	2913
ENSDARG00000002880	ENSDART00000017917	19	24	24	AGAGCCTAATAGACATGGTGAGTAA	7	+	2072	2913
ENSDARG00000002880	ENSDART00000017917	19	27	27	AGCCAAAGCCATAGATTATGAGCA	6	+	2385	2913
ENSDARG00000002880	ENSDART00000017917	19	27	27	TGCTGCTGCTGATGGCTGGAGTG	5	+	2411	2913
ENSDARG00000002880	ENSDART00000017917	19	27	27	GCCAAAGCCATAGATTATGAGCA	5	+	2386	2913
ENSDARG00000002880	ENSDART00000017917	19	29	29	GACCCATTCCTGACAAGGAGTTTGT	7	+	2714	2913
ENSDARG00000003205	ENSDART00000019206	19	1	1	TCCAAAAACACTTCCGTGGTATTT	6	-	45	1932
ENSDARG00000003205	ENSDART00000019206	19	1	1	GTTGTCCGCGTATGTAATGAGCA	5	-	80	1932
ENSDARG00000003205	ENSDART00000019206	19	1	1	GTCCAAAAACACTTCCGTGGTATTT	7	-	45	1932
ENSDARG00000003205	ENSDART00000019206	19	2	2	ACAGGCAGAAGCTTGGTGGAGAA	5	-	160	1932
ENSDARG00000003205	ENSDART00000019206	19	3	3	AGCAGCAGCAGGGCCTGCAGAAGCA	7	-	399	1932
ENSDARG00000003205	ENSDART00000019206	19	3	3	GCCTGCAGAAGCAGTGGAGGATAG	6	-	388	1932
ENSDARG00000003205	ENSDART00000019206	19	3	3	CTCAGCTTCTCCACAGATGCTGAC	6	-	252	1932
ENSDARG00000003205	ENSDART00000019206	19	4	4	TGCATCTGCATCATTGGCTTGTTT	6	-	601	1932
ENSDARG00000003205	ENSDART00000019206	19	7	7	GCCAACTTCATACAGGAGGGGTT	5	-	1046	1932
ENSDARG00000003205	ENSDART00000019206	19	7	7	GCCAACTTCATACAGGAGGGGTTT	6	-	1045	1932
ENSDARG00000003205	ENSDART00000019206	19	7	7	ACATACCTCAGCGTTGAGTTTGTT	6	-	1207	1932
ENSDARG00000003205	ENSDART00000019206	19	7	7	AGCCACGTCTCCTGGACTTGTGT	5	-	1171	1932
ENSDARG00000003205	ENSDART00000019206	19	7	7	TCCAGCGGCGCTGAGACTGAGAG	5	-	990	1932
ENSDARG00000003205	ENSDART00000019206	19	8	8	TCCACCAGCTCCACCAGCAGCCTTT	7	-	1268	1932
ENSDARG00000003205	ENSDART00000019206	19	8	8	ACCAGCTCCACCAGCAGCCTTTGCA	7	-	1265	1932
ENSDARG00000003205	ENSDART00000019206	19	10	10	TTCATCTTCATTCCTGCTGGAGCG	6	-	1650	1932
ENSDARG00000003207	ENSDART00000006338	19	2	1	CACAACACAACATACTGCAGCAGAG	7	+	101	1206
ENSDARG00000003207	ENSDART00000006338	19	2	1	CAACACAACATACTGCAGCAGAG	5	+	103	1206
ENSDARG00000003207	ENSDART00000006338	19	2	1	ATCTGCAGCTCTCCAGCAGTCGAC	6	+	57	1206
ENSDARG00000003207	ENSDART00000006338	19	2	1	ATCTACAGCAGACCAGGAGGACTTC	7	+	142	1206
ENSDARG00000003207	ENSDART00000006338	19	3	2	ACACTCAGACCGTATGTGGAGAA	5	+	397	1206
ENSDARG00000003207	ENSDART00000006338	19	4	3	CTCGACTTCCAGGCAGACGTTGCA	6	+	508	1206
ENSDARG00000003207	ENSDART00000006338	19	4	3	CTCTTCCTCAGAGATCTGGGAGTTG	7	+	541	1206
ENSDARG00000003207	ENSDART00000006338	19	4	3	TTCCTCAGAGATCTGGGAGTTGAG	6	+	544	1206
ENSDARG00000003207	ENSDART00000006338	19	5	4	CTCGACAACCGACTGGGCTTTTTT	6	+	736	1206
ENSDARG00000003207	ENSDART00000006338	19	5	4	CTCGACAACCGACTGGGCTTTTTTC	7	+	736	1206
ENSDARG00000003207	ENSDART00000006338	19	7	6	AACTCACGCAGATCTTTGACTTT	5	+	950	1206
ENSDARG00000003207	ENSDART00000006338	19	8	7	TACATCTCCTTGAGTCGTTTGGTGT	7	+	1114	1206
ENSDARG00000003251	ENSDART00000018336	19	1	1	GTTCAAGGCACACCGATGTGTGC	5	+	168	2013
ENSDARG00000003251	ENSDART00000018336	19	1	1	AGCCACAGCGGACCAGACTTTTGT	6	+	18	2013
ENSDARG00000003251	ENSDART00000018336	19	1	1	CAAGGCACACCGATGTGTGCTGGC	6	+	171	2013
ENSDARG00000003251	ENSDART00000018336	19	2	2	TTATGCCCAGAAAACAGTGGGTGGT	7	+	896	2013
ENSDARG00000003251	ENSDART00000018336	19	2	2	GCATACACCGGCCAGCTGCGAATGC	7	+	301	2013
ENSDARG00000003251	ENSDART00000018336	19	2	2	AACTACCTCACTGTTGGCAGTGTGC	7	+	343	2013
ENSDARG00000003251	ENSDART00000018336	19	2	2	AGAGACGCAAACTTTGGCGGAGCC	6	+	595	2013
ENSDARG00000003251	ENSDART00000018336	19	3	3	CAATCAAGCTGCCCTGGAGTCTAC	6	+	1299	2013
ENSDARG00000003251	ENSDART00000018336	19	3	3	TGCCTAGCCAAGGGGCTTTGGGTAG	7	+	1397	2013
ENSDARG00000003251	ENSDART00000018336	19	3	3	TGCCTAGCCAAGGGGCTTTGGGT	5	+	1397	2013
ENSDARG00000003251	ENSDART00000018336	19	3	3	TACCTCAAATTTGAGAGGGGTATAA	7	+	1126	2013
ENSDARG00000003251	ENSDART00000018336	19	3	3	AGCCCAATCAAGGTGGTGCCGGC	5	+	1787	2013
ENSDARG00000003251	ENSDART00000018336	19	3	3	GAAGACCCACACCGGTCTGAAGCC	6	+	1611	2013
ENSDARG00000003320	ENSDART00000019459	19	3	3	TACATCAGCATCATGGAGGTTTG	5	+	301	2496
ENSDARG00000003320	ENSDART00000019459	19	3	3	TACATCAGCATCATGGAGGTTTGT	6	+	301	2496
ENSDARG00000003320	ENSDART00000019459	19	3	3	ATCAGCATCATGGAGGTTTGTGC	5	+	304	2496
ENSDARG00000003320	ENSDART00000019459	19	8	8	GAAGGCAGCCATTGATAAGATGAT	6	+	579	2496
ENSDARG00000003320	ENSDART00000019459	19	10	10	TGCCGCCGCTTGAGGGGTTTGTC	5	+	716	2496
ENSDARG00000003320	ENSDART00000019459	19	12	12	AGCTGCACCCCTCATGGAAGAGTGC	7	+	929	2496
ENSDARG00000003320	ENSDART00000019459	19	13	13	ACCCTCAGAAGATGTTGCTGTCGTG	7	+	986	2496
ENSDARG00000003320	ENSDART00000019459	19	14	14	ACAGCCAGCGTGAGCAGTTTGAGTA	7	+	1087	2496
ENSDARG00000003320	ENSDART00000019459	19	14	14	GCCCTAGACACAGCCAGCGTGAGCA	7	+	1078	2496
ENSDARG00000003320	ENSDART00000019459	19	17	17	GCCACCTGCAGCCGCGTGTTGAAC	6	+	1462	2496
ENSDARG00000003320	ENSDART00000019459	19	17	17	TCCCGCCACCTGCAGCCGCGTGT	5	+	1458	2496
ENSDARG00000003320	ENSDART00000019459	19	20	20	CCCTTCCCATTTGACGAGGAAGAC	6	+	1849	2496
ENSDARG00000003320	ENSDART00000019459	19	20	20	GTCCCCTTCCCATTTGACGAGGAA	6	+	1846	2496
ENSDARG00000003320	ENSDART00000019459	19	21	21	CACAACAACAGACATCGCAGACGAG	7	+	1981	2496
ENSDARG00000003320	ENSDART00000019459	19	23	23	CTCTGCAGCAAAGACAGGTGACAAC	7	+	2236	2496
ENSDARG00000003320	ENSDART00000019459	19	23	23	CTCAGCATCGTCCAGTGAGGATGAG	7	+	2124	2496
ENSDARG00000003320	ENSDART00000019459	19	23	23	AGCATCGTCCAGTGAGGATGAGTG	6	+	2127	2496
ENSDARG00000003320	ENSDART00000103321	19	3	3	TACATCAGCATCATGGAGGTTTGT	6	+	301	2493
ENSDARG00000003320	ENSDART00000103321	19	3	3	TACATCAGCATCATGGAGGTTTG	5	+	301	2493
ENSDARG00000003320	ENSDART00000103321	19	3	3	ATCAGCATCATGGAGGTTTGTGC	5	+	304	2493
ENSDARG00000003320	ENSDART00000103321	19	4	4	CCCAACTTCACTGCTGCTGACTGT	6	+	355	2493
ENSDARG00000003320	ENSDART00000103321	19	7	7	GAAGGCAGCCATTGATAAGATGAT	6	+	576	2493
ENSDARG00000003320	ENSDART00000103321	19	9	9	TGCCGCCGCTTGAGGGGTTTGTC	5	+	713	2493
ENSDARG00000003320	ENSDART00000103321	19	11	11	AGCTGCACCCCTCATGGAAGAGTGC	7	+	926	2493
ENSDARG00000003320	ENSDART00000103321	19	12	12	ACCCTCAGAAGATGTTGCTGTCGTG	7	+	983	2493
ENSDARG00000003320	ENSDART00000103321	19	13	13	ACAGCCAGCGTGAGCAGTTTGAGTA	7	+	1084	2493
ENSDARG00000003320	ENSDART00000103321	19	13	13	GCCCTAGACACAGCCAGCGTGAGCA	7	+	1075	2493
ENSDARG00000003320	ENSDART00000103321	19	16	16	TCCCGCCACCTGCAGCCGCGTGT	5	+	1455	2493
ENSDARG00000003320	ENSDART00000103321	19	16	16	GCCACCTGCAGCCGCGTGTTGAAC	6	+	1459	2493
ENSDARG00000003320	ENSDART00000103321	19	19	19	GTCCCCTTCCCATTTGACGAGGAA	6	+	1843	2493
ENSDARG00000003320	ENSDART00000103321	19	19	19	CCCTTCCCATTTGACGAGGAAGAC	6	+	1846	2493
ENSDARG00000003320	ENSDART00000103321	19	20	20	CACAACAACAGACATCGCAGACGAG	7	+	1978	2493
ENSDARG00000003320	ENSDART00000103321	19	22	22	AGCATCGTCCAGTGAGGATGAGTG	6	+	2124	2493
ENSDARG00000003320	ENSDART00000103321	19	22	22	CTCTGCAGCAAAGACAGGTGACAAC	7	+	2233	2493
ENSDARG00000003320	ENSDART00000103321	19	22	22	CTCAGCATCGTCCAGTGAGGATGAG	7	+	2121	2493
ENSDARG00000003511	ENSDART00000020928	19	2	2	GGCCCAGACATGAGTGGGTGGAA	5	+	263	1035
ENSDARG00000003511	ENSDART00000020928	19	2	2	CTCAACCCCCTTAAGGATGAGCC	5	+	238	1035
ENSDARG00000003511	ENSDART00000020928	19	2	2	GACTCAACCCCCTTAAGGATGAGCC	7	+	236	1035
ENSDARG00000003511	ENSDART00000020928	19	4	4	GCACACATCAGCTCTGGTCGTTGGT	7	+	429	1035
ENSDARG00000003511	ENSDART00000020928	19	4	4	CACATCAGCTCTGGTCGTTGGTGGA	7	+	432	1035
ENSDARG00000003511	ENSDART00000020928	19	8	8	GTTTACAACACCAATTTTGGCTTG	6	+	802	1035
ENSDARG00000003511	ENSDART00000020928	19	10	10	GTTCCCCACATTCTTCGCTGATGGA	7	+	957	1035
ENSDARG00000003511	ENSDART00000020928	19	10	10	TTCCCCACATTCTTCGCTGATGGA	6	+	958	1035
ENSDARG00000003511	ENSDART00000104399	19	3	3	GGCCCAGACATGAGTGGGTGGAA	5	+	185	957
ENSDARG00000003511	ENSDART00000104399	19	5	5	CACATCAGCTCTGGTCGTTGGTGGA	7	+	354	957
ENSDARG00000003511	ENSDART00000104399	19	5	5	GCACACATCAGCTCTGGTCGTTGGT	7	+	351	957
ENSDARG00000003511	ENSDART00000104399	19	9	9	GTTTACAACACCAATTTTGGCTTG	6	+	724	957
ENSDARG00000003511	ENSDART00000104399	19	11	11	TTCCCCACATTCTTCGCTGATGGA	6	+	880	957
ENSDARG00000003511	ENSDART00000104399	19	11	11	GTTCCCCACATTCTTCGCTGATGGA	7	+	879	957
ENSDARG00000003513	ENSDART00000023747	19	1	1	GTCCAAGCCTCCAAATTCTGCTTCT	7	+	12	2268
ENSDARG00000003513	ENSDART00000023747	19	2	2	GTCTGCCTCCATCTCGACGGCTTT	6	+	858	2268
ENSDARG00000003513	ENSDART00000023747	19	2	2	GTCCCAAACGCACTGCTGCATCT	5	+	674	2268
ENSDARG00000003513	ENSDART00000023747	19	2	2	GTCAACCTCAACTGGCTTTGGCTTC	7	+	801	2268
ENSDARG00000003513	ENSDART00000023747	19	2	2	GTCAACCTCAACTGGCTTTGGCT	5	+	801	2268
ENSDARG00000003513	ENSDART00000023747	19	2	2	GACGTCAACCTCAACTGGCTTTGGC	7	+	798	2268
ENSDARG00000003513	ENSDART00000023747	19	2	2	CTCGACGGCTTTCAAGAAGTATGT	6	+	870	2268
ENSDARG00000003513	ENSDART00000023747	19	2	2	AAAGTCCACCAGCAAAGACGTCAAC	7	+	782	2268
ENSDARG00000003513	ENSDART00000023747	19	3	3	ATCTTCTCCGCCGTCATCTGGAGGC	7	+	1344	2268
ENSDARG00000003513	ENSDART00000023747	19	3	3	AGAATCATCAAGGAGGGATGAAGAT	7	+	1206	2268
ENSDARG00000003513	ENSDART00000023747	19	3	3	AAAAAACCCTTGTCACGATGCGGGA	7	+	1127	2268
ENSDARG00000003513	ENSDART00000023747	19	3	3	TCCGCCGTCATCTGGAGGCAGGC	5	+	1350	2268
ENSDARG00000003513	ENSDART00000023747	19	5	5	TACCAAAGAAAAGCGGCAGAGGTC	6	+	1705	2268
ENSDARG00000003680	ENSDART00000010294	19	3	3	AGCTGCCACCGGCCTGTGGAGCA	5	+	287	1764
ENSDARG00000003680	ENSDART00000010294	19	6	6	AGAACCAAAGAGAACGGCTTTGAG	6	+	688	1764
ENSDARG00000003680	ENSDART00000010294	19	7	7	AGCAGCACACGCCAGGAGGAAGTC	6	+	952	1764
ENSDARG00000003680	ENSDART00000010294	19	7	7	AGACTCACAGACAGAGAATGGGCA	6	+	985	1764
ENSDARG00000003680	ENSDART00000010294	19	7	7	ACAGACAGAGAATGGGCAGAAGAG	6	+	991	1764
ENSDARG00000003680	ENSDART00000010294	19	11	11	AGACACTGCAGGCCCAGCAGCAGGG	7	+	1613	1764
ENSDARG00000003680	ENSDART00000010294	19	11	11	TTCAGCCACTCCCAGCAGCGGAG	5	+	1662	1764
ENSDARG00000003680	ENSDART00000010294	19	11	11	TCCAGCAGACACACCGTCTGCCGCC	7	+	1692	1764
ENSDARG00000003680	ENSDART00000010294	19	11	11	GCAGGCCCAGCAGCAGGGTGAGAC	6	+	1620	1764
ENSDARG00000003680	ENSDART00000010294	19	11	11	GCAGACACACCGTCTGCCGCCGCC	6	+	1696	1764
ENSDARG00000003680	ENSDART00000010294	19	11	11	AAAAGCACCACCACGTGTGTGGCC	6	+	1589	1764
ENSDARG00000003680	ENSDART00000010294	19	11	11	AGCCACTCCCAGCAGCGGAGCTGGA	7	+	1665	1764
ENSDARG00000003680	ENSDART00000021009	19	3	3	AGCTGCCACCGGCCTGTGGAGCA	5	+	287	1764
ENSDARG00000003680	ENSDART00000021009	19	6	6	AGAACCAAAGAGAACGGCTTTGAG	6	+	688	1764
ENSDARG00000003680	ENSDART00000021009	19	7	7	AGCAGCACACGCCAGGAGGAAGTC	6	+	952	1764
ENSDARG00000003680	ENSDART00000021009	19	7	7	AGACTCACAGACAGAGAATGGGCA	6	+	985	1764
ENSDARG00000003680	ENSDART00000021009	19	7	7	ACAGACAGAGAATGGGCAGAAGAG	6	+	991	1764
ENSDARG00000003680	ENSDART00000021009	19	11	11	AGACACTGCAGGCCCAGCAGCAGGG	7	+	1613	1764
ENSDARG00000003680	ENSDART00000021009	19	11	11	AGCCACTCCCAGCAGCGGAGCTGGA	7	+	1665	1764
ENSDARG00000003680	ENSDART00000021009	19	11	11	AAAAGCACCACCACGTGTGTGGCC	6	+	1589	1764
ENSDARG00000003680	ENSDART00000021009	19	11	11	GCAGACACACCGTCTGCCGCCGCC	6	+	1696	1764
ENSDARG00000003680	ENSDART00000021009	19	11	11	GCAGGCCCAGCAGCAGGGTGAGAC	6	+	1620	1764
ENSDARG00000003680	ENSDART00000021009	19	11	11	TCCAGCAGACACACCGTCTGCCGCC	7	+	1692	1764
ENSDARG00000003680	ENSDART00000021009	19	11	11	TTCAGCCACTCCCAGCAGCGGAG	5	+	1662	1764
ENSDARG00000003680	ENSDART00000052058	19	3	2	AGCTGCCACCGGCCTGTGGAGCA	5	+	236	933
ENSDARG00000003680	ENSDART00000052058	19	6	5	AGAACCAAAGAGAACGGCTTTGAG	6	+	637	933
ENSDARG00000003810	ENSDART00000054274	19	1	1	GACGACTGCCCTCTCGGCGGGGTC	6	-	199	4758
ENSDARG00000003810	ENSDART00000054274	19	1	1	GTTTGCGCCTCTCGTGTTTGGAT	5	-	153	4758
ENSDARG00000003810	ENSDART00000054274	19	1	1	GTTTGCGCCTCTCGTGTTTGGATAG	7	-	151	4758
ENSDARG00000003810	ENSDART00000054274	19	3	3	TCCTCATACAGGTCTGTGATGTG	5	-	304	4758
ENSDARG00000003810	ENSDART00000054274	19	5	5	TTAATCCCAGTGTCAGCTTTGGGT	6	-	506	4758
ENSDARG00000003810	ENSDART00000054274	19	6	6	GTTGACTCCATATTAGCAGCTTCT	6	-	605	4758
ENSDARG00000003810	ENSDART00000054274	19	7	7	ACCTTCAGCATCCAGGAGTCGAG	5	-	815	4758
ENSDARG00000003810	ENSDART00000054274	19	8	8	GAAAGCGTCGTAGATGGAGGAGAC	6	-	880	4758
ENSDARG00000003810	ENSDART00000054274	19	8	8	TCCACCCTCTGGGATCTTGGGGA	5	-	902	4758
ENSDARG00000003810	ENSDART00000054274	19	11	11	TTCCTCCTCCAGGTCATTAGGGTGT	7	-	1200	4758
ENSDARG00000003810	ENSDART00000054274	19	12	12	CTCTTCACAATCTAAAGCCGTGTTC	7	-	1323	4758
ENSDARG00000003810	ENSDART00000054274	19	14	14	AGCTCATAAATAAAGCGCAGACTGC	7	-	1778	4758
ENSDARG00000003810	ENSDART00000054274	19	14	14	CGCTCCAGCAGATCTTGCGTTTCT	6	-	1818	4758
ENSDARG00000003810	ENSDART00000054274	19	15	15	AACTGCTACGTAAATTGGGTGAGAC	7	-	1963	4758
ENSDARG00000003810	ENSDART00000054274	19	18	18	TTAATCCACTGCCACTGCGTCTGC	6	-	2319	4758
ENSDARG00000003810	ENSDART00000054274	19	18	18	ATCCACTGCCACTGCGTCTGCAGGG	7	-	2315	4758
ENSDARG00000003810	ENSDART00000054274	19	19	19	CTAATCTGCCAAGTCTGCTGTTTTT	7	-	2476	4758
ENSDARG00000003810	ENSDART00000054274	19	20	20	CTACAAGACTGGCCACTGTGCTGCG	7	-	2551	4758
ENSDARG00000003810	ENSDART00000054274	19	21	21	ACACACTCCTCGCCTTTGCTGAT	5	-	2683	4758
ENSDARG00000003810	ENSDART00000054274	19	21	21	ACACTCCTCGCCTTTGCTGATGGT	6	-	2680	4758
ENSDARG00000003810	ENSDART00000054274	19	23	23	AGAGACACCAGCAGTGTTTGGCA	5	-	3112	4758
ENSDARG00000003810	ENSDART00000054274	19	23	23	GTTGTCTAAAGCCTGCTGTCTCT	5	-	2981	4758
ENSDARG00000003810	ENSDART00000054274	19	23	23	GTCTCCAGAGACACCAGCAGTGTTT	7	-	3116	4758
ENSDARG00000003810	ENSDART00000054274	19	25	25	ACAGGCACACTGGAAGATGTAGGT	6	-	3390	4758
ENSDARG00000003810	ENSDART00000054274	19	26	26	GTCCTCTTCACTCAGTCGACTCT	5	-	3554	4758
ENSDARG00000003810	ENSDART00000054274	19	27	27	CACTCCACCTGTCTGTAAGCTGGT	6	-	3773	4758
ENSDARG00000003810	ENSDART00000054274	19	32	32	GACCCACCCGAGCAGGTCTGAGAC	6	-	4312	4758
ENSDARG00000003810	ENSDART00000054274	19	33	33	AGCAACTTCCTCTTTTTTAGCCGCT	7	-	4410	4758
ENSDARG00000003810	ENSDART00000054274	19	34	34	ACATACACACTGCTGTAGCATTT	5	-	4751	4758
ENSDARG00000003810	ENSDART00000054274	19	34	34	GTTTCAAGCCGTTGAAGCTGGCGTT	7	-	4676	4758
ENSDARG00000003810	ENSDART00000054274	19	34	34	CTATCACACAGTTGTGTGTATGT	5	-	4540	4758
ENSDARG00000003931	ENSDART00000038202	19	1	1	CACCAAAACGAATATGTTGAGGTA	6	+	49	1422
ENSDARG00000003931	ENSDART00000038202	19	1	1	CACCAAAACGAATATGTTGAGGT	5	+	49	1422
ENSDARG00000003931	ENSDART00000038202	19	1	1	AGCACCAAAACGAATATGTTGAGGT	7	+	47	1422
ENSDARG00000003931	ENSDART00000038202	19	2	2	GGCAAAGACATCGAGAGACTGGGTG	7	+	154	1422
ENSDARG00000003931	ENSDART00000038202	19	2	2	AAAGACATCGAGAGACTGGGTGGAA	7	+	157	1422
ENSDARG00000003931	ENSDART00000038202	19	3	3	GCAGCCGGCCAGCATTGAAGATGGC	7	+	315	1422
ENSDARG00000003931	ENSDART00000038202	19	5	5	ACCTACGGCTTGAGAGGAATTTGCT	7	+	628	1422
ENSDARG00000003931	ENSDART00000038202	19	5	5	GACTACGTCTGCATTTCTGATAAC	6	+	574	1422
ENSDARG00000003931	ENSDART00000038202	19	5	5	TGCTACTTCTTTATTGAGGTAGGA	6	+	649	1422
ENSDARG00000003931	ENSDART00000038202	19	9	9	ATCATCCTCACTACATGGCTGGGAG	7	+	1178	1422
ENSDARG00000004017	ENSDART00000007578	19	1	1	GAAGGCTGCCATTCGCTGCCGGG	5	-	144	1170
ENSDARG00000004017	ENSDART00000007578	19	2	2	GAACACAGAGATCCTCTGGGCTGTC	7	-	367	1170
ENSDARG00000004017	ENSDART00000007578	19	3	3	GGCTTCAGCGAGAAGGGGTGGAG	5	-	472	1170
ENSDARG00000004017	ENSDART00000007578	19	3	3	GGCTTCAGCGAGAAGGGGTGGAGCT	7	-	470	1170
ENSDARG00000004017	ENSDART00000007578	19	6	6	AGCCTCTGCTTTTCTGGCTGTGGAG	7	-	774	1170
ENSDARG00000004017	ENSDART00000007578	19	7	7	CAAACCTTCAAGCCTTTGTGTGC	5	-	1033	1170
ENSDARG00000004017	ENSDART00000007578	19	7	7	AGAATCACAGTCCTGTTTGGCTTC	6	-	958	1170
ENSDARG00000004169	ENSDART00000007906	19	3	2	AACTCATTCTTGACATCTGAAGCA	6	-	93	444
ENSDARG00000004169	ENSDART00000007906	19	3	2	TTCTGCTGCTTCAAGTTTTTTCT	5	-	164	444
ENSDARG00000004169	ENSDART00000007906	19	4	3	TGCTCACGCTTTTCTGCTAGGTG	5	-	223	444
ENSDARG00000004169	ENSDART00000007906	19	4	3	CTCTTCTGCCATCTTGCTGAAGTT	6	-	286	444
ENSDARG00000004169	ENSDART00000007906	19	5	4	TTCTTCACCATTGTGCTCTTTGGTT	7	-	426	444
ENSDARG00000004280	ENSDART00000013865	19	1	1	TCCTACGACTTCCATGGACGGAGGA	7	+	64	1092
ENSDARG00000004280	ENSDART00000013865	19	3	3	CACTGCAGCTGTGTGGGAGGAGAT	6	+	252	1092
ENSDARG00000004280	ENSDART00000013865	19	4	4	GTTGACCACCTGCTCTGCAGACGGT	7	+	396	1092
ENSDARG00000004280	ENSDART00000013865	19	4	4	ACCACCTGCTCTGCAGACGGTGTG	6	+	400	1092
ENSDARG00000004280	ENSDART00000013865	19	6	6	AACTCCTACCACTGAGGTTAGTAG	6	+	755	1092
ENSDARG00000004280	ENSDART00000013865	19	7	7	GGCCTCCTCTGGAGATGACGGCTGT	7	+	888	1092
ENSDARG00000004280	ENSDART00000013865	19	7	7	TCCCACTAAGTTCGAGGTGCAGGT	6	+	795	1092
ENSDARG00000004280	ENSDART00000013865	19	8	8	CGCAGCTACTGCTGGCAGGTGGG	5	+	1059	1092
ENSDARG00000004280	ENSDART00000013865	19	8	8	CTCTGCTGCTCTGAGTGCTGTCGGC	7	+	1005	1092
ENSDARG00000004280	ENSDART00000013865	19	8	8	AGCTACTGCTGGCAGGTGGGTAG	5	+	1062	1092
ENSDARG00000004280	ENSDART00000052238	19	1	1	TCCTACGACTTCCATGGACGGAGGA	7	+	64	558
ENSDARG00000004280	ENSDART00000052238	19	3	3	CACTGCAGCTGTGTGGGAGGAGAT	6	+	252	558
ENSDARG00000004280	ENSDART00000052238	19	4	4	GTTGACCACCTGCTCTGCAGACGGT	7	+	396	558
ENSDARG00000004280	ENSDART00000052238	19	4	4	ACCACCTGCTCTGCAGACGGTGTG	6	+	400	558
ENSDARG00000004311	ENSDART00000021396	19	1	1	AAACTCGCCATGGATGTGCTGAA	5	+	1	861
ENSDARG00000004311	ENSDART00000021396	19	2	2	TTAACCTTCGACATCTGGGGATGAC	7	+	149	861
ENSDARG00000004311	ENSDART00000021396	19	2	2	AGCTGCTGCTGTCAAGAGGATTGT	6	+	207	861
ENSDARG00000004311	ENSDART00000021396	19	4	4	CAAGACGCATGACAAAGTGTTTGCT	7	+	372	861
ENSDARG00000004311	ENSDART00000021396	19	4	4	ACCAACAGAATGAAACTCTGGAGTG	7	+	410	861
ENSDARG00000004311	ENSDART00000021396	19	5	5	GGCTCAGGCCTTCAGAGTGGCCTTC	7	+	489	861
ENSDARG00000004343	ENSDART00000047649	19	4	3	AAATGCTAATCAAATCTGGGGCA	5	+	206	1038
ENSDARG00000004343	ENSDART00000047649	19	8	7	GTATCCAGAGCGCAGAGGTGTGC	5	+	684	1038
ENSDARG00000004343	ENSDART00000047649	19	8	7	TACGGCACCGGTTTAGTGGAGGAC	6	+	730	1038
ENSDARG00000004343	ENSDART00000047649	19	9	8	ATCAGCAGACCAGGCTGTGGCGGA	6	+	849	1038
ENSDARG00000004343	ENSDART00000047649	19	9	8	ATCAGCAGACCAGGCTGTGGCGGAG	7	+	849	1038
ENSDARG00000004343	ENSDART00000047649	19	10	9	AGCAGCCCATGCTGGATGCCGCC	5	+	926	1038
ENSDARG00000004355	ENSDART00000011128	19	1	1	GAACCCATCGTTTCTGAAGAAGAC	6	-	221	708
ENSDARG00000004355	ENSDART00000011128	19	1	1	ACAGTCGTCTGGTTTCTGCTGAC	5	-	338	708
ENSDARG00000004378	ENSDART00000016415	19	1	1	TGCGTCCCATTGAATGCGTCGCA	5	-	70	1608
ENSDARG00000004378	ENSDART00000016415	19	1	1	GAATGCGTCGCAGGAGTTTTGGTT	6	-	58	1608
ENSDARG00000004378	ENSDART00000016415	19	7	7	CGCATCGTCCCAGTCTCTGATGGA	6	-	568	1608
ENSDARG00000004378	ENSDART00000016415	19	9	9	GTTTTCACAGCCACTTTAGTGGTG	6	-	882	1608
ENSDARG00000004378	ENSDART00000016415	19	9	9	CACAGCCACTTTAGTGGTGCCGTT	6	-	877	1608
ENSDARG00000004378	ENSDART00000016415	19	12	12	AGCTCCGTCAACAGGATGCCGAA	5	-	1360	1608
ENSDARG00000004378	ENSDART00000016415	19	12	12	AGACCATACGTCTGATTTGATGGT	6	-	1336	1608
ENSDARG00000004378	ENSDART00000016415	19	13	13	TCCTCCAGCACTGAAGCATGAGCT	6	-	1496	1608
ENSDARG00000004378	ENSDART00000023798	19	1	1	TGCGTCCCATTGAATGCGTCGCA	5	-	70	1608
ENSDARG00000004378	ENSDART00000023798	19	1	1	GAATGCGTCGCAGGAGTTTTGGTT	6	-	58	1608
ENSDARG00000004378	ENSDART00000023798	19	7	7	CGCATCGTCCCAGTCTCTGATGGA	6	-	568	1608
ENSDARG00000004378	ENSDART00000023798	19	9	9	CACAGCCACTTTAGTGGTGCCGTT	6	-	877	1608
ENSDARG00000004378	ENSDART00000023798	19	9	9	GTTTTCACAGCCACTTTAGTGGTG	6	-	882	1608
ENSDARG00000004378	ENSDART00000023798	19	12	12	AGCTCCGTCAACAGGATGCCGAA	5	-	1360	1608
ENSDARG00000004378	ENSDART00000023798	19	12	12	AGACCATACGTCTGATTTGATGGT	6	-	1336	1608
ENSDARG00000004378	ENSDART00000023798	19	13	13	TCCTCCAGCACTGAAGCATGAGCT	6	-	1496	1608
ENSDARG00000004378	ENSDART00000102394	19	1	1	TGCGTCCCATTGAATGCGTCGCA	5	-	70	1575
ENSDARG00000004378	ENSDART00000102394	19	1	1	GAATGCGTCGCAGGAGTTTTGGTT	6	-	58	1575
ENSDARG00000004378	ENSDART00000102394	19	5	5	CGCATCGTCCCAGTCTCTGATGGA	6	-	544	1575
ENSDARG00000004378	ENSDART00000102394	19	6	6	CTAAGCCCATTGTTTGTGGTGTG	5	-	729	1575
ENSDARG00000004378	ENSDART00000102394	19	6	6	CCCAACTTCCGGTTGAGCTTGAGCG	7	-	782	1575
ENSDARG00000004378	ENSDART00000102394	19	6	6	GGCCTAAGCCCATTGTTTGTGGTG	6	-	731	1575
ENSDARG00000004378	ENSDART00000102394	19	7	7	CACAGCCACTTTAGTGGTGCCGTT	6	-	844	1575
ENSDARG00000004378	ENSDART00000102394	19	7	7	GTTTTCACAGCCACTTTAGTGGTG	6	-	849	1575
ENSDARG00000004378	ENSDART00000102394	19	10	10	AGCTCCGTCAACAGGATGCCGAA	5	-	1327	1575
ENSDARG00000004378	ENSDART00000102394	19	10	10	AGACCATACGTCTGATTTGATGGT	6	-	1303	1575
ENSDARG00000004378	ENSDART00000102394	19	11	11	TCCTCCAGCACTGAAGCATGAGCT	6	-	1463	1575
ENSDARG00000004378	ENSDART00000102395	19	1	1	TGCGTCCCATTGAATGCGTCGCA	5	-	70	1584
ENSDARG00000004378	ENSDART00000102395	19	1	1	GAATGCGTCGCAGGAGTTTTGGTT	6	-	58	1584
ENSDARG00000004378	ENSDART00000102395	19	5	5	CGCATCGTCCCAGTCTCTGATGGA	6	-	544	1584
ENSDARG00000004378	ENSDART00000102395	19	7	7	GTTTTCACAGCCACTTTAGTGGTG	6	-	858	1584
ENSDARG00000004378	ENSDART00000102395	19	7	7	CACAGCCACTTTAGTGGTGCCGTT	6	-	853	1584
ENSDARG00000004378	ENSDART00000102395	19	10	10	AGCTCCGTCAACAGGATGCCGAA	5	-	1336	1584
ENSDARG00000004378	ENSDART00000102395	19	10	10	AGACCATACGTCTGATTTGATGGT	6	-	1312	1584
ENSDARG00000004378	ENSDART00000102395	19	11	11	TCCTCCAGCACTGAAGCATGAGCT	6	-	1472	1584
ENSDARG00000004405	ENSDART00000022803	19	1	1	TTCCTCACCTTTCTGTCTTGTTT	5	-	88	630
ENSDARG00000004405	ENSDART00000022803	19	4	4	CCCTGCATCCGTTGTGTGATGTG	5	-	346	630
ENSDARG00000004405	ENSDART00000022803	19	4	4	AGCCCCTGCATCCGTTGTGTGATGT	7	-	347	630
ENSDARG00000004405	ENSDART00000022803	19	5	5	GTACACACCTGTCACAGTCTGAGTC	7	-	586	630
ENSDARG00000004405	ENSDART00000022803	19	5	5	TTCGCCGCCACATCGCTGGATTG	5	-	512	630
ENSDARG00000004436	ENSDART00000020301	19	2	2	GTTGGCAAAGATCTCCGAAGTGTTT	7	-	88	885
ENSDARG00000004436	ENSDART00000020301	19	2	2	CACCTCTGCTTGCCGGTAGTCTTG	6	-	256	885
ENSDARG00000004436	ENSDART00000020301	19	4	4	GCCTCATTCTTTCCAGCTGCTGCA	6	-	395	885
ENSDARG00000004436	ENSDART00000020301	19	4	4	TCCAGCTGCTGCATCTGCTTGGCC	6	-	384	885
ENSDARG00000004436	ENSDART00000020301	19	6	6	TTCCTCATCTACATTCTGAATGT	5	-	638	885
ENSDARG00000004472	ENSDART00000049368	19	3	3	TTCTCAGGCCCAGCAGCTGCCTGC	6	+	156	915
ENSDARG00000004472	ENSDART00000049368	19	3	3	CTCTACCTCCTGAAAGATGGAGAA	6	+	223	915
ENSDARG00000004472	ENSDART00000049368	19	6	6	GCCTGCGCAGATGGCGTATGATAG	6	+	441	915
ENSDARG00000004472	ENSDART00000049368	19	6	6	AACAGCACAAACAGGTGGAGCCTGC	7	+	422	915
ENSDARG00000004472	ENSDART00000049368	19	9	9	CCCCCAAGAAAGCCAGAGGGAGAG	6	+	641	915
ENSDARG00000004472	ENSDART00000049368	19	10	10	CCCCGCTTCGCCCCGCCGCGGCC	5	+	825	915
ENSDARG00000004472	ENSDART00000050209	19	3	3	TTCTCAGGCCCAGCAGCTGCCTGC	6	+	156	915
ENSDARG00000004472	ENSDART00000050209	19	3	3	CTCTACCTCCTGAAAGATGGAGAA	6	+	223	915
ENSDARG00000004472	ENSDART00000050209	19	6	6	AACAGCACAAACAGGTGGAGCCTGC	7	+	422	915
ENSDARG00000004472	ENSDART00000050209	19	6	6	GCCTGCGCAGATGGCGTATGATAG	6	+	441	915
ENSDARG00000004472	ENSDART00000050209	19	9	9	CCCCCAAGAAAGCCAGAGGGAGAG	6	+	641	915
ENSDARG00000004472	ENSDART00000050209	19	10	10	CCCCGCTTCGCCCCGCCGCGGCC	5	+	825	915
ENSDARG00000004472	ENSDART00000103922	19	3	3	CTCTACCTCCTGAAAGATGGAGAA	6	+	223	891
ENSDARG00000004472	ENSDART00000103922	19	3	3	TTCTCAGGCCCAGCAGCTGCCTGC	6	+	156	891
ENSDARG00000004472	ENSDART00000103922	19	6	6	GCCTGCGCAGATGGCGTATGATAG	6	+	441	891
ENSDARG00000004472	ENSDART00000103922	19	6	6	AACAGCACAAACAGGTGGAGCCTGC	7	+	422	891
ENSDARG00000004472	ENSDART00000103922	19	8	8	CCCCCAAGAAAGCCAGAGGGAGAG	6	+	595	891
ENSDARG00000004472	ENSDART00000103922	19	9	9	CCCCGCTTCGCCCCGCCGCGGCC	5	+	779	891
ENSDARG00000004481	ENSDART00000015137	19	4	3	TGCTTCAGCTCCTCGCTCTGAGGAC	7	-	548	771
ENSDARG00000004481	ENSDART00000015137	19	4	3	TTCTTCAACATAAGGCTTGAGCT	5	-	374	771
ENSDARG00000004498	ENSDART00000032374	19	4	4	CCCTTCTCCAACTTAGGGGAATGC	6	-	489	918
ENSDARG00000004498	ENSDART00000032374	19	4	4	AGACCCTTCTCCAACTTAGGGGAA	6	-	492	918
ENSDARG00000004498	ENSDART00000032374	19	6	6	CACAGCAAATAGACAGCAGTGGCG	6	-	612	918
ENSDARG00000004498	ENSDART00000104033	19	4	4	CACAGCAAATAGACAGCAGTGGCG	6	-	600	1032
ENSDARG00000004498	ENSDART00000104033	19	4	4	CAAAACAAATCCGAATGCCGTTGTG	7	-	559	1032
ENSDARG00000004498	ENSDART00000104033	19	4	4	AACAAATCCGAATGCCGTTGTGGTA	7	-	556	1032
ENSDARG00000004498	ENSDART00000104033	19	4	4	AAACAAATCCGAATGCCGTTGTG	5	-	559	1032
ENSDARG00000004588	ENSDART00000026992	19	1	1	TGCTGCTGCTGGTGTGCGTCTGC	5	-	36	1089
ENSDARG00000004588	ENSDART00000026992	19	1	1	TGCTGCTGCTGCTGGTGTGCGTCT	6	-	38	1089
ENSDARG00000004588	ENSDART00000026992	19	1	1	TCCTCATCCGAGGAGGATGACTGC	6	-	864	1089
ENSDARG00000004588	ENSDART00000026992	19	1	1	GCCGGCACCGCGACAGAGGGCGGG	6	-	684	1089
ENSDARG00000004588	ENSDART00000026992	19	1	1	GACTTCACCTTCTTCCGAGGTCGAT	7	-	407	1089
ENSDARG00000004588	ENSDART00000026992	19	1	1	GACTGCTCCATAATCTTGCGCCTCT	7	-	242	1089
ENSDARG00000004588	ENSDART00000026992	19	1	1	GAACTCCTCATCCGAGGAGGATGAC	7	-	867	1089
ENSDARG00000004588	ENSDART00000026992	19	1	1	GAACTCAAAGTGCGAGCCGGAGCC	6	-	988	1089
ENSDARG00000004588	ENSDART00000026992	19	1	1	CTCCTCATCCGAGGAGGATGACTGC	7	-	864	1089
ENSDARG00000004588	ENSDART00000026992	19	1	1	CTCCCCAGAATCAATGGAGTCGCC	6	-	79	1089
ENSDARG00000004588	ENSDART00000026992	19	1	1	CGCTACTGCTGCTGCTGCTGGTGTG	7	-	43	1089
ENSDARG00000004588	ENSDART00000026992	19	1	1	CGCGACAGAGGGCGGGCTGCTGTC	6	-	676	1089
ENSDARG00000004588	ENSDART00000026992	19	1	1	CACCGCGACAGAGGGCGGGCTGC	5	-	680	1089
ENSDARG00000004644	ENSDART00000006575	19	4	3	ATCTCACCACGGAAGTTAGTCTGC	6	-	270	696
ENSDARG00000004644	ENSDART00000006575	19	5	4	CCCTCACGCTGCCCACTCTGTCGCA	7	-	493	696
ENSDARG00000004644	ENSDART00000006575	19	6	5	GAAGGCACAAAACTCGTTGTAGTG	6	-	598	696
ENSDARG00000004644	ENSDART00000006575	19	6	5	GCACAAAACTCGTTGTAGTGTCT	5	-	595	696
ENSDARG00000004644	ENSDART00000103735	19	3	3	ATCTCACCACGGAAGTTAGTCTGC	6	-	189	567
ENSDARG00000004644	ENSDART00000103735	19	4	4	CCCTCACGCTGCCCACTCTGTCGCA	7	-	412	567
ENSDARG00000004644	ENSDART00000103735	19	5	5	GCACAAAACTCGTTGTAGTGTCT	5	-	514	567
ENSDARG00000004644	ENSDART00000103735	19	5	5	GAAGGCACAAAACTCGTTGTAGTG	6	-	517	567
ENSDARG00000004686	ENSDART00000008522	19	3	3	ACCTTCCCATCAACGCCGAAGAG	5	-	166	522
ENSDARG00000004686	ENSDART00000008522	19	3	3	CCCATCAACGCCGAAGAGGCCGTT	6	-	160	522
ENSDARG00000004686	ENSDART00000008522	19	3	3	TTCCCATGCAGCTCTGGAATGAGGC	7	-	308	522
ENSDARG00000004856	ENSDART00000080227	19	7	7	TTCAGCATCTCAGCTCTGAATAA	5	+	562	2157
ENSDARG00000004856	ENSDART00000080227	19	14	14	ACATTCAACTCTAAAAGAGGTGAAC	7	+	1591	2157
ENSDARG00000004856	ENSDART00000080227	19	14	14	TGCTTCAGCAATGGATTTGCAGAA	6	+	1482	2157
ENSDARG00000004856	ENSDART00000080227	19	15	15	TTACGCTGCTGTGGGCAGAAGTT	5	+	1703	2157
ENSDARG00000004856	ENSDART00000080227	19	15	15	GTTCCATCCCTCCCTCTGCCTTT	5	+	1723	2157
ENSDARG00000004856	ENSDART00000080227	19	15	15	AACATCACAGTGACTGAAGCTGTG	6	+	1654	2157
ENSDARG00000004856	ENSDART00000080227	19	18	18	GCCTACAAAGGAAGTTTGGTGAA	5	+	2053	2157
ENSDARG00000004856	ENSDART00000089846	19	10	10	TTCAGCATCTCAGCTCTGAATAA	5	+	847	12573
ENSDARG00000004856	ENSDART00000089846	19	17	17	ACATTCAACTCTAAAAGAGGTGAAC	7	+	1876	12573
ENSDARG00000004856	ENSDART00000089846	19	17	17	TGCTTCAGCAATGGATTTGCAGAA	6	+	1767	12573
ENSDARG00000004856	ENSDART00000089846	19	18	18	TTACGCTGCTGTGGGCAGAAGTT	5	+	1988	12573
ENSDARG00000004856	ENSDART00000089846	19	18	18	AACATCACAGTGACTGAAGCTGTG	6	+	1939	12573
ENSDARG00000004856	ENSDART00000089846	19	18	18	GTTCCATCCCTCCCTCTGCCTTT	5	+	2008	12573
ENSDARG00000004856	ENSDART00000089846	19	21	21	GCCTACAAAGGAAGTTTGGTGAA	5	+	2335	12573
ENSDARG00000004856	ENSDART00000089846	19	26	26	TACAAATAAACCACAGGTGTATTT	6	+	3174	12573
ENSDARG00000004856	ENSDART00000089846	19	26	26	CTCTTCAAACAGAAAATTATGGGAG	7	+	3133	12573
ENSDARG00000004856	ENSDART00000089846	19	27	27	AAAGACTCCGACAGTGACTGGGAT	6	+	3258	12573
ENSDARG00000004856	ENSDART00000089846	19	27	27	GACTCCGACAGTGACTGGGATTTC	6	+	3261	12573
ENSDARG00000004856	ENSDART00000089846	19	29	29	CACTCAACCATGTAGCATTGTAG	5	+	3468	12573
ENSDARG00000004856	ENSDART00000089846	19	29	29	GCACTCAACCATGTAGCATTGTAG	6	+	3467	12573
ENSDARG00000004856	ENSDART00000089846	19	30	30	CACAAACCACAACAGTATTTGGT	5	+	3641	12573
ENSDARG00000004856	ENSDART00000089846	19	36	36	CACGTCTGCTCATATCTGGTTCT	5	+	4802	12573
ENSDARG00000004856	ENSDART00000089846	19	36	36	GAAATCGACCGCAGATTTGTGGTT	6	+	4726	12573
ENSDARG00000004856	ENSDART00000089846	19	36	36	GACAGCAGAGCACCAGTAGGCGTA	6	+	4642	12573
ENSDARG00000004856	ENSDART00000089846	19	36	36	ATCAACCCAACATCAGGCAGCATTG	7	+	5275	12573
ENSDARG00000004856	ENSDART00000089846	19	36	36	GCACACACACTCTAAAGGTGGTGGT	7	+	5192	12573
ENSDARG00000004856	ENSDART00000089846	19	36	36	GCAGACACAGTGAGGTGTTTGAC	5	+	5398	12573
ENSDARG00000004856	ENSDART00000089846	19	36	36	TCCCTCTGCAAGATTTTAGATGTG	6	+	5371	12573
ENSDARG00000004856	ENSDART00000089846	19	36	36	GACTGCAGACACAGTGAGGTGTTT	6	+	5394	12573
ENSDARG00000004856	ENSDART00000089846	19	36	36	CAACCCAACATCAGGCAGCATTG	5	+	5277	12573
ENSDARG00000004856	ENSDART00000089846	19	36	36	ATCGACCGCAGATTTGTGGTTCT	5	+	4729	12573
ENSDARG00000004856	ENSDART00000089846	19	36	36	ACATCAGGCAGCATTGCTGGAGGA	6	+	5284	12573
ENSDARG00000004856	ENSDART00000089846	19	36	36	AAACACAACTGTGAAGCTTGGTAA	6	+	5346	12573
ENSDARG00000004856	ENSDART00000089846	19	36	36	ATCTTCTTCATGCAGTTCTGATTGC	7	+	4959	12573
ENSDARG00000004856	ENSDART00000089846	19	38	38	CTACTCAACTCAACTGTGAAGTC	5	+	5909	12573
ENSDARG00000004856	ENSDART00000089846	19	39	39	GTCTGCGCAGTCATTGTGATGAA	5	+	5962	12573
ENSDARG00000004856	ENSDART00000089846	19	41	41	GTCATCTCCCTACACATGGGGTGGT	7	+	6309	12573
ENSDARG00000004856	ENSDART00000089846	19	41	41	TCCCTACACATGGGGTGGTCTCT	5	+	6315	12573
ENSDARG00000004856	ENSDART00000089846	19	46	46	ACCTGCACATTCCGCTGTGGAGGCT	7	+	8053	12573
ENSDARG00000004856	ENSDART00000089846	19	46	46	ACCTGCACATTCCGCTGTGGAGGC	6	+	8053	12573
ENSDARG00000004856	ENSDART00000089846	19	46	46	GCATTCGCAGGGTTGGTTTGGCT	5	+	7617	12573
ENSDARG00000004856	ENSDART00000089846	19	46	46	TACTGCACCTATCGCGGTGTTGTC	6	+	7933	12573
ENSDARG00000004856	ENSDART00000089846	19	46	46	GCATTCGCAGGGTTGGTTTGGCTTG	7	+	7617	12573
ENSDARG00000004856	ENSDART00000089846	19	46	46	ACATTCCGCTGTGGAGGCTGGAGCG	7	+	8059	12573
ENSDARG00000004856	ENSDART00000089846	19	46	46	TCCCCATGCGCACCGGCAGCTGCA	6	+	7661	12573
ENSDARG00000004856	ENSDART00000089846	19	46	46	AACTACTGCACCTATCGCGGTGTTG	7	+	7930	12573
ENSDARG00000004856	ENSDART00000089846	19	46	46	TTAGACACAATGCCGCAGCTGGA	5	+	7481	12573
ENSDARG00000004856	ENSDART00000089846	19	48	48	GACCCACACAATGGGCTGGTTGGTA	7	+	8409	12573
ENSDARG00000004856	ENSDART00000089846	19	48	48	ACCCACACAATGGGCTGGTTGGTA	6	+	8410	12573
ENSDARG00000004856	ENSDART00000089846	19	48	48	ACCCACACAATGGGCTGGTTGGTAA	7	+	8410	12573
ENSDARG00000004856	ENSDART00000089846	19	50	50	AGCCCCGACAAACGGCCGCAGAC	5	+	8829	12573
ENSDARG00000004856	ENSDART00000089846	19	51	51	TGCCACAACAAGGTTCTGATGTG	5	+	8918	12573
ENSDARG00000004856	ENSDART00000089846	19	51	51	GTCAAATACATCATTTTGGAGGT	5	+	8871	12573
ENSDARG00000004856	ENSDART00000089846	19	52	52	TTCAAAGGCATTTGGGTGGTTGT	5	+	8947	12573
ENSDARG00000004856	ENSDART00000089846	19	52	52	TTCAAAGGCATTTGGGTGGTTGTG	6	+	8947	12573
ENSDARG00000004856	ENSDART00000089846	19	52	52	GTCCCCTCCCTGAATAAGCTGAA	5	+	8980	12573
ENSDARG00000004856	ENSDART00000089846	19	53	53	ACCAAATTAAGCATTTGAGTTTGTC	7	+	9245	12573
ENSDARG00000004856	ENSDART00000089846	19	53	53	GAATTCAACCAAATTAAGCATTT	5	+	9238	12573
ENSDARG00000004856	ENSDART00000089846	19	54	54	GCAAGCACATCCCAGGCAGGAAAC	6	+	9322	12573
ENSDARG00000004856	ENSDART00000089846	19	58	58	TTCATCACACCGTTGGAGAAGGT	5	+	9893	12573
ENSDARG00000004856	ENSDART00000089846	19	64	64	AGCCTCACCCTGGATTAATGAGCT	6	+	10571	12573
ENSDARG00000004856	ENSDART00000089846	19	65	65	GTCTGCAGACACAACGTTTGTTGGG	7	+	10620	12573
ENSDARG00000004856	ENSDART00000089846	19	65	65	GCAGACACAACGTTTGTTGGGTT	5	+	10624	12573
ENSDARG00000004856	ENSDART00000089846	19	65	65	GCAGACACAACGTTTGTTGGGTTC	6	+	10624	12573
ENSDARG00000004856	ENSDART00000089846	19	66	66	CCCCCAGCACGGACTGGGCGACTAC	7	+	10929	12573
ENSDARG00000004856	ENSDART00000089846	19	66	66	AGACCCCCAGCACGGACTGGGCG	5	+	10926	12573
ENSDARG00000004856	ENSDART00000089846	19	69	69	CAAACCCTCAGCGGTTAGATGTA	5	+	11375	12573
ENSDARG00000004856	ENSDART00000089846	19	69	69	TCCAACAAATGCTCAGTGGAATGC	6	+	11421	12573
ENSDARG00000004856	ENSDART00000089846	19	69	69	CTCAAACCCTCAGCGGTTAGATGTA	7	+	11373	12573
ENSDARG00000004856	ENSDART00000089846	19	70	70	CGCACCTCCCCAGTTCTGTTTGT	5	+	11590	12573
ENSDARG00000004856	ENSDART00000089846	19	70	70	CACCTCCCCAGTTCTGTTTGTGGCC	7	+	11592	12573
ENSDARG00000004856	ENSDART00000089846	19	70	70	TTAATCAACAATCTTGCTGCATTC	6	+	11662	12573
ENSDARG00000004856	ENSDART00000089846	19	70	70	ACCTCCCCAGTTCTGTTTGTGGCC	6	+	11593	12573
ENSDARG00000004856	ENSDART00000089846	19	70	70	ACCAACAGCACCACAGGTGACAAC	6	+	11812	12573
ENSDARG00000004856	ENSDART00000089846	19	73	73	CTACAACACCATCTAGTGTTGTTG	6	+	12443	12573
ENSDARG00000004856	ENSDART00000089846	19	73	73	TTAGCCATCTATACAAGCGGTGGGT	7	+	12265	12573
ENSDARG00000004856	ENSDART00000089846	19	73	73	TACAACACCATCTAGTGTTGTTGTC	7	+	12444	12573
ENSDARG00000004856	ENSDART00000089846	19	73	73	TACAACACCATCTAGTGTTGTTG	5	+	12444	12573
ENSDARG00000004856	ENSDART00000089846	19	73	73	CAACCATTCCATTCAGTGGCTGTT	6	+	12224	12573
ENSDARG00000004856	ENSDART00000090399	19	10	10	TTCAGCATCTCAGCTCTGAATAA	5	+	754	12675
ENSDARG00000004856	ENSDART00000090399	19	17	17	ACATTCAACTCTAAAAGAGGTGAAC	7	+	1783	12675
ENSDARG00000004856	ENSDART00000090399	19	17	17	TGCTTCAGCAATGGATTTGCAGAA	6	+	1674	12675
ENSDARG00000004856	ENSDART00000090399	19	18	18	AACATCACAGTGACTGAAGCTGTG	6	+	1846	12675
ENSDARG00000004856	ENSDART00000090399	19	18	18	GTTCCATCCCTCCCTCTGCCTTT	5	+	1915	12675
ENSDARG00000004856	ENSDART00000090399	19	18	18	TTACGCTGCTGTGGGCAGAAGTT	5	+	1895	12675
ENSDARG00000004856	ENSDART00000090399	19	21	21	GCCTACAAAGGAAGTTTGGTGAA	5	+	2242	12675
ENSDARG00000004856	ENSDART00000090399	19	26	26	TACAAATAAACCACAGGTGTATTT	6	+	3084	12675
ENSDARG00000004856	ENSDART00000090399	19	26	26	CTCTTCAAACAGAAAATTATGGGAG	7	+	3043	12675
ENSDARG00000004856	ENSDART00000090399	19	27	27	GACTCCGACAGTGACTGGGATTTC	6	+	3171	12675
ENSDARG00000004856	ENSDART00000090399	19	27	27	AAAGACTCCGACAGTGACTGGGAT	6	+	3168	12675
ENSDARG00000004856	ENSDART00000090399	19	29	29	CCCAACATCAGGAAGTGTGGCAGGT	7	+	3456	12675
ENSDARG00000004856	ENSDART00000090399	19	30	30	CACTCAACCATGTAGCATTGTAG	5	+	3540	12675
ENSDARG00000004856	ENSDART00000090399	19	30	30	GCACTCAACCATGTAGCATTGTAG	6	+	3539	12675
ENSDARG00000004856	ENSDART00000090399	19	31	31	CACAAACCACAACAGTATTTGGT	5	+	3713	12675
ENSDARG00000004856	ENSDART00000090399	19	38	38	ACATCAGGCAGCATTGCTGGAGGA	6	+	5404	12675
ENSDARG00000004856	ENSDART00000090399	19	38	38	GACAGCAGAGCACCAGTAGGCGTA	6	+	4762	12675
ENSDARG00000004856	ENSDART00000090399	19	38	38	CACGTCTGCTCATATCTGGTTCT	5	+	4922	12675
ENSDARG00000004856	ENSDART00000090399	19	38	38	GACTGCAGACACAGTGAGGTGTTT	6	+	5514	12675
ENSDARG00000004856	ENSDART00000090399	19	38	38	GAAATCGACCGCAGATTTGTGGTT	6	+	4846	12675
ENSDARG00000004856	ENSDART00000090399	19	38	38	CAACCCAACATCAGGCAGCATTG	5	+	5397	12675
ENSDARG00000004856	ENSDART00000090399	19	38	38	GCACACACACTCTAAAGGTGGTGGT	7	+	5312	12675
ENSDARG00000004856	ENSDART00000090399	19	38	38	TCCCTCTGCAAGATTTTAGATGTG	6	+	5491	12675
ENSDARG00000004856	ENSDART00000090399	19	38	38	ATCTTCTTCATGCAGTTCTGATTGC	7	+	5079	12675
ENSDARG00000004856	ENSDART00000090399	19	38	38	ATCGACCGCAGATTTGTGGTTCT	5	+	4849	12675
ENSDARG00000004856	ENSDART00000090399	19	38	38	ATCAACCCAACATCAGGCAGCATTG	7	+	5395	12675
ENSDARG00000004856	ENSDART00000090399	19	38	38	AAACACAACTGTGAAGCTTGGTAA	6	+	5466	12675
ENSDARG00000004856	ENSDART00000090399	19	38	38	GCAGACACAGTGAGGTGTTTGAC	5	+	5518	12675
ENSDARG00000004856	ENSDART00000090399	19	40	40	CTACTCAACTCAACTGTGAAGTC	5	+	6029	12675
ENSDARG00000004856	ENSDART00000090399	19	41	41	GTCTGCGCAGTCATTGTGATGAA	5	+	6100	12675
ENSDARG00000004856	ENSDART00000090399	19	43	43	GTCATCTCCCTACACATGGGGTGGT	7	+	6447	12675
ENSDARG00000004856	ENSDART00000090399	19	43	43	TCCCTACACATGGGGTGGTCTCT	5	+	6453	12675
ENSDARG00000004856	ENSDART00000090399	19	48	48	GCATTCGCAGGGTTGGTTTGGCTTG	7	+	7755	12675
ENSDARG00000004856	ENSDART00000090399	19	48	48	TTAGACACAATGCCGCAGCTGGA	5	+	7619	12675
ENSDARG00000004856	ENSDART00000090399	19	48	48	AACTACTGCACCTATCGCGGTGTTG	7	+	8068	12675
ENSDARG00000004856	ENSDART00000090399	19	48	48	ACCTGCACATTCCGCTGTGGAGGC	6	+	8191	12675
ENSDARG00000004856	ENSDART00000090399	19	48	48	TACTGCACCTATCGCGGTGTTGTC	6	+	8071	12675
ENSDARG00000004856	ENSDART00000090399	19	48	48	ACATTCCGCTGTGGAGGCTGGAGCG	7	+	8197	12675
ENSDARG00000004856	ENSDART00000090399	19	48	48	ACCTGCACATTCCGCTGTGGAGGCT	7	+	8191	12675
ENSDARG00000004856	ENSDART00000090399	19	48	48	TCCCCATGCGCACCGGCAGCTGCA	6	+	7799	12675
ENSDARG00000004856	ENSDART00000090399	19	48	48	GCATTCGCAGGGTTGGTTTGGCT	5	+	7755	12675
ENSDARG00000004856	ENSDART00000090399	19	50	50	ACCCACACAATGGGCTGGTTGGTA	6	+	8548	12675
ENSDARG00000004856	ENSDART00000090399	19	50	50	ACCCACACAATGGGCTGGTTGGTAA	7	+	8548	12675
ENSDARG00000004856	ENSDART00000090399	19	50	50	GACCCACACAATGGGCTGGTTGGTA	7	+	8547	12675
ENSDARG00000004856	ENSDART00000090399	19	52	52	AGCCCCGACAAACGGCCGCAGAC	5	+	8967	12675
ENSDARG00000004856	ENSDART00000090399	19	53	53	GTCAAATACATCATTTTGGAGGT	5	+	9009	12675
ENSDARG00000004856	ENSDART00000090399	19	53	53	TGCCACAACAAGGTTCTGATGTG	5	+	9056	12675
ENSDARG00000004856	ENSDART00000090399	19	54	54	TTCAAAGGCATTTGGGTGGTTGT	5	+	9085	12675
ENSDARG00000004856	ENSDART00000090399	19	54	54	GTCCCCTCCCTGAATAAGCTGAA	5	+	9118	12675
ENSDARG00000004856	ENSDART00000090399	19	54	54	TTCAAAGGCATTTGGGTGGTTGTG	6	+	9085	12675
ENSDARG00000004856	ENSDART00000090399	19	56	56	GCAAGCACATCCCAGGCAGGAAAC	6	+	9424	12675
ENSDARG00000004856	ENSDART00000090399	19	60	60	TTCATCACACCGTTGGAGAAGGT	5	+	9995	12675
ENSDARG00000004856	ENSDART00000090399	19	66	66	AGCCTCACCCTGGATTAATGAGCT	6	+	10673	12675
ENSDARG00000004856	ENSDART00000090399	19	67	67	GTCTGCAGACACAACGTTTGTTGGG	7	+	10722	12675
ENSDARG00000004856	ENSDART00000090399	19	67	67	GCAGACACAACGTTTGTTGGGTT	5	+	10726	12675
ENSDARG00000004856	ENSDART00000090399	19	67	67	GCAGACACAACGTTTGTTGGGTTC	6	+	10726	12675
ENSDARG00000004856	ENSDART00000090399	19	68	68	CCCCCAGCACGGACTGGGCGACTAC	7	+	11031	12675
ENSDARG00000004856	ENSDART00000090399	19	68	68	AGACCCCCAGCACGGACTGGGCG	5	+	11028	12675
ENSDARG00000004856	ENSDART00000090399	19	71	71	CTCAAACCCTCAGCGGTTAGATGTA	7	+	11475	12675
ENSDARG00000004856	ENSDART00000090399	19	71	71	CAAACCCTCAGCGGTTAGATGTA	5	+	11477	12675
ENSDARG00000004856	ENSDART00000090399	19	71	71	TCCAACAAATGCTCAGTGGAATGC	6	+	11523	12675
ENSDARG00000004856	ENSDART00000090399	19	72	72	CACCTCCCCAGTTCTGTTTGTGGCC	7	+	11694	12675
ENSDARG00000004856	ENSDART00000090399	19	72	72	TTAATCAACAATCTTGCTGCATTC	6	+	11764	12675
ENSDARG00000004856	ENSDART00000090399	19	72	72	ACCTCCCCAGTTCTGTTTGTGGCC	6	+	11695	12675
ENSDARG00000004856	ENSDART00000090399	19	72	72	ACCAACAGCACCACAGGTGACAAC	6	+	11914	12675
ENSDARG00000004856	ENSDART00000090399	19	72	72	CGCACCTCCCCAGTTCTGTTTGT	5	+	11692	12675
ENSDARG00000004856	ENSDART00000090399	19	75	75	CAACCATTCCATTCAGTGGCTGTT	6	+	12326	12675
ENSDARG00000004856	ENSDART00000090399	19	75	75	CTACAACACCATCTAGTGTTGTTG	6	+	12545	12675
ENSDARG00000004856	ENSDART00000090399	19	75	75	TACAACACCATCTAGTGTTGTTG	5	+	12546	12675
ENSDARG00000004856	ENSDART00000090399	19	75	75	TTAGCCATCTATACAAGCGGTGGGT	7	+	12367	12675
ENSDARG00000004856	ENSDART00000090399	19	75	75	TACAACACCATCTAGTGTTGTTGTC	7	+	12546	12675
ENSDARG00000004866	ENSDART00000026282	19	1	1	CACCACAGCTTCTCTTGAAGACGAC	7	+	207	1560
ENSDARG00000004866	ENSDART00000026282	19	1	1	CACAGCTTCTCTTGAAGACGACGCT	7	+	210	1560
ENSDARG00000004866	ENSDART00000026282	19	1	1	GCAGACACCGTTGATGGTGAGAT	5	+	25	1560
ENSDARG00000004866	ENSDART00000026282	19	2	2	GTTCCCGGCTCAGACAGAAGTGGTC	7	+	624	1560
ENSDARG00000004866	ENSDART00000026282	19	2	2	GTCACCACAGAAGAGCTGATGGC	5	+	646	1560
ENSDARG00000004866	ENSDART00000026282	19	4	4	GTTGTCGACGGGTCTGGATGTGAAC	7	+	774	1560
ENSDARG00000004866	ENSDART00000026282	19	5	5	CTCAGCTACAACCAGCTGGTGGA	5	+	931	1560
ENSDARG00000004866	ENSDART00000026282	19	5	5	AGCTACAACCAGCTGGTGGAGAA	5	+	934	1560
ENSDARG00000004866	ENSDART00000026282	19	6	6	AACACCACAGCCAAGGAGGGAGAG	6	+	1072	1560
ENSDARG00000004866	ENSDART00000026282	19	6	6	CAACACCACAGCCAAGGAGGGAGAG	7	+	1071	1560
ENSDARG00000004866	ENSDART00000026282	19	7	7	GCCCTCCACACAGCAGCAGCAGCA	6	+	1302	1560
ENSDARG00000004866	ENSDART00000026282	19	7	7	CCCTCCACACAGCAGCAGCAGCA	5	+	1303	1560
ENSDARG00000004866	ENSDART00000026282	19	7	7	CCCTTCCCAGAAGCCTTCTGCAGCA	7	+	1269	1560
ENSDARG00000004866	ENSDART00000026282	19	7	7	CTCCACACAGCAGCAGCAGCAGAT	6	+	1305	1560
ENSDARG00000004866	ENSDART00000026282	19	7	7	AGAGTCTCCATAATGTGGAGGGA	5	+	1208	1560
ENSDARG00000004866	ENSDART00000026282	19	8	8	CACAAACACAACAGCAGCAGCAGCA	7	+	1448	1560
ENSDARG00000004866	ENSDART00000026282	19	8	8	AGCCACAAACACAACAGCAGCAGCA	7	+	1445	1560
ENSDARG00000004866	ENSDART00000026282	19	8	8	ACAAACACAACAGCAGCAGCAGCA	6	+	1449	1560
ENSDARG00000004866	ENSDART00000026282	19	8	8	AAACACAACAGCAGCAGCAGCAGCA	7	+	1451	1560
ENSDARG00000005023	ENSDART00000004392	19	1	1	GTCATCTAACGGTACCGGCGGCGCG	7	-	69	1704
ENSDARG00000005023	ENSDART00000004392	19	2	2	TCCATCCCAGCGATCAGCTGCTTCT	7	-	248	1704
ENSDARG00000005023	ENSDART00000004392	19	2	2	GTAACCATCCTTTCCGTAGGCGAG	6	-	331	1704
ENSDARG00000005023	ENSDART00000004392	19	3	3	CACATCAAAGTGAAGGATGGAGTC	6	-	373	1704
ENSDARG00000005023	ENSDART00000004392	19	5	5	GTATTCTACCTTTACTGCGATTTC	6	-	763	1704
ENSDARG00000005023	ENSDART00000004392	19	7	7	GACAAAGTCTCCACGTTTTGCGTTG	7	-	1140	1704
ENSDARG00000005023	ENSDART00000004392	19	7	7	AAAGTCTCCACGTTTTGCGTTGTA	6	-	1138	1704
ENSDARG00000005023	ENSDART00000004392	19	7	7	AAAGTCTCCACGTTTTGCGTTGTAA	7	-	1137	1704
ENSDARG00000005023	ENSDART00000004392	19	8	8	TACGTCTTACCATACATGTGCCTGC	7	-	1211	1704
ENSDARG00000005023	ENSDART00000004392	19	9	9	TTCCACACAAACATGTAGCCTTC	5	-	1444	1704
ENSDARG00000005023	ENSDART00000004392	19	10	10	CTCTTCTACCTGCTGGAGGATGTA	6	-	1546	1704
ENSDARG00000005023	ENSDART00000004392	19	10	10	TGCTGCTTCGTCTGCTTTGAGTTT	6	-	1675	1704
ENSDARG00000005023	ENSDART00000004392	19	10	10	AGCTGCTGCTTCGTCTGCTTTGAG	6	-	1678	1704
ENSDARG00000005023	ENSDART00000004392	19	10	10	CTCTTCTACCTGCTGGAGGATGT	5	-	1547	1704
ENSDARG00000005023	ENSDART00000004392	19	10	10	GCCCTCTTCTACCTGCTGGAGGA	5	-	1550	1704
ENSDARG00000005026	ENSDART00000024639	19	1	1	GACAAAGTCCAAAAGTGGCATTG	5	+	1695	2556
ENSDARG00000005026	ENSDART00000024639	19	1	1	GCACACTCCAGTTCGAGAAGGAGAA	7	+	1341	2556
ENSDARG00000005026	ENSDART00000024639	19	1	1	GCCATCCACTGTTCCTGTGTAGTG	6	+	2222	2556
ENSDARG00000005026	ENSDART00000024639	19	1	1	GTCCTAGCCATGGAGGAGTTGGT	5	+	1138	2556
ENSDARG00000005026	ENSDART00000024639	19	1	1	GTCCTAGCCATGGAGGAGTTGGTG	6	+	1138	2556
ENSDARG00000005026	ENSDART00000024639	19	1	1	GTTGACAGCCCACATGATGGTGAC	6	+	516	2556
ENSDARG00000005026	ENSDART00000024639	19	1	1	CTCATCTCCTCTTCGGGAGAATGC	6	+	1809	2556
ENSDARG00000005026	ENSDART00000024639	19	1	1	CTCACCAGAGCAGCCTTTAGTTAAC	7	+	1467	2556
ENSDARG00000005026	ENSDART00000024639	19	1	1	ATCCCAGCATTCATGCTGCCTAC	5	+	956	2556
ENSDARG00000005026	ENSDART00000024639	19	1	1	AGATGCAGATGGATGTGCTTTTGAG	7	+	1920	2556
ENSDARG00000005026	ENSDART00000024639	19	1	1	AGAGTCTCCTAAAGGTGGCCTAG	5	+	855	2556
ENSDARG00000005026	ENSDART00000024639	19	1	1	AGAAAAGTCAGATGCAGATGGATGT	7	+	1911	2556
ENSDARG00000005026	ENSDART00000024639	19	1	1	ACCATCTCCCACTGGTTGGCGAA	5	+	2140	2556
ENSDARG00000005026	ENSDART00000024639	19	1	1	ACCACCATCTCCCACTGGTTGGCG	6	+	2137	2556
ENSDARG00000005162	ENSDART00000010997	19	1	1	TACAACAGCAAGCAGATGAGGCA	5	+	59	750
ENSDARG00000005162	ENSDART00000010997	19	2	2	TGCAAAAGCTGGAGGAAGCCGAG	5	+	230	750
ENSDARG00000005162	ENSDART00000010997	19	2	2	GTATCCAGCTGGTTGAGGAGGAG	5	+	173	750
ENSDARG00000005162	ENSDART00000010997	19	2	2	GTATCCAGCTGGTTGAGGAGGAGTT	7	+	173	750
ENSDARG00000005162	ENSDART00000010997	19	2	2	CCCTGCAAAAGCTGGAGGAAGCC	5	+	227	750
ENSDARG00000005162	ENSDART00000010997	19	3	3	GACCGCAAATATGAAGAGGTATTT	6	+	382	750
ENSDARG00000005162	ENSDART00000010997	19	3	3	GGCCAAGCACATTGCTGAGGAGGCT	7	+	357	750
ENSDARG00000005162	ENSDART00000027598	19	1	1	TGCAAAAGCTGGAGGAAGCCGAG	5	+	98	612
ENSDARG00000005162	ENSDART00000027598	19	1	1	CCCTGCAAAAGCTGGAGGAAGCC	5	+	95	612
ENSDARG00000005162	ENSDART00000027598	19	1	1	GTATCCAGCTGGTTGAGGAGGAGTT	7	+	41	612
ENSDARG00000005162	ENSDART00000027598	19	1	1	GTATCCAGCTGGTTGAGGAGGAG	5	+	41	612
ENSDARG00000005162	ENSDART00000027598	19	2	2	GGCCAAGCACATTGCTGAGGAGGCT	7	+	219	612
ENSDARG00000005162	ENSDART00000027598	19	2	2	GACCGCAAATATGAAGAGGTATTT	6	+	244	612
ENSDARG00000005162	ENSDART00000027598	19	4	4	GTCACCAACAATCTTAAGAGTTT	5	+	367	612
ENSDARG00000005162	ENSDART00000027598	19	4	4	AGCAAATGCGCTGAGCTGGAGGA	5	+	331	612
ENSDARG00000005230	ENSDART00000027785	19	4	3	GGCCGCAGAACCACTGTGTGAGAA	6	-	282	555
ENSDARG00000005510	ENSDART00000022193	19	1	1	AACACCATCACGAGCTTTGTGGAC	6	+	325	1236
ENSDARG00000005510	ENSDART00000022193	19	1	1	AAATACGGCAAGAATGTGCTGTC	5	+	151	1236
ENSDARG00000005510	ENSDART00000022193	19	2	2	AAAGTCAAAATCTAGATGCAGCA	5	+	924	1236
ENSDARG00000005510	ENSDART00000022193	19	2	2	GTTTTCGACGTCTGGGAGATTTT	5	+	592	1236
ENSDARG00000005510	ENSDART00000022193	19	2	2	TCCAAACTCAGTCCCATTAGCATCT	7	+	1147	1236
ENSDARG00000005510	ENSDART00000022193	19	2	2	TTCGACGTCTGGGAGATTTTTAA	5	+	595	1236
ENSDARG00000005522	ENSDART00000044943	19	1	1	GTTGCCCACATGGATCTTGGGCG	5	+	237	981
ENSDARG00000005522	ENSDART00000044943	19	1	1	GACAACAGCACGTTTTGCTGGGAA	6	+	487	981
ENSDARG00000005522	ENSDART00000044943	19	3	3	AGCTCAGACTGTTCTGGTGGTGGTG	7	+	678	981
ENSDARG00000005522	ENSDART00000044943	19	3	3	AGCTCAGACTGTTCTGGTGGTGGT	6	+	678	981
ENSDARG00000005625	ENSDART00000009149	19	1	1	CTCTGCCTCCAGAACAGCAGATGCT	7	+	134	1518
ENSDARG00000005625	ENSDART00000009149	19	1	1	GAAAGCAAAAGGAAGTGCAGAAGGA	7	+	77	1518
ENSDARG00000005625	ENSDART00000009149	19	2	2	CACCTCAAAAGGCATGTCTGAAGCA	7	+	189	1518
ENSDARG00000005625	ENSDART00000009149	19	2	2	CGCCACATCGAGATTTGATGGAGAA	7	+	620	1518
ENSDARG00000005625	ENSDART00000009149	19	2	2	AGCAACAGCAGCACAGCATAGGAA	6	+	323	1518
ENSDARG00000005625	ENSDART00000009149	19	2	2	CTCAACAACGAGCTCGGCGGCAGTG	7	+	427	1518
ENSDARG00000005625	ENSDART00000009149	19	2	2	ACCTCAAAAGGCATGTCTGAAGCA	6	+	190	1518
ENSDARG00000005625	ENSDART00000009149	19	2	2	ACATCCTACAGACTGTAGATGCT	5	+	356	1518
ENSDARG00000005625	ENSDART00000009149	19	2	2	CAACTCAACCAATGGCAGCGTAC	5	+	540	1518
ENSDARG00000005625	ENSDART00000009149	19	2	2	TGCGCCACATCGAGATTTGATGGA	6	+	618	1518
ENSDARG00000005625	ENSDART00000009149	19	4	4	GGCCACAGCCGCACGTGCTGTCGCT	7	+	990	1518
ENSDARG00000005625	ENSDART00000009149	19	4	4	ACAAGCAAACCATTGTGCAGCTGGA	7	+	881	1518
ENSDARG00000005625	ENSDART00000009149	19	4	4	AGCAAACCATTGTGCAGCTGGAGAA	7	+	884	1518
ENSDARG00000005625	ENSDART00000009149	19	5	5	AGCTCACACACGACATGAAGCTGAA	7	+	1091	1518
ENSDARG00000005625	ENSDART00000009149	19	5	5	ACACACGACATGAAGCTGAAGGA	5	+	1096	1518
ENSDARG00000005625	ENSDART00000009149	19	5	5	AGAGTCGCATACGTGAGCTGGAGTC	7	+	1055	1518
ENSDARG00000005625	ENSDART00000009149	19	7	7	AGATTCTGCAGAAGGAGCAGGAGAT	7	+	1331	1518
ENSDARG00000005625	ENSDART00000009149	19	7	7	AGCATCACCTACTCGGCGGAGAC	5	+	1402	1518
ENSDARG00000005628	ENSDART00000052636	19	1	1	TCCGTCAAATTAGAGCCGGTTTT	5	-	73	1131
ENSDARG00000005628	ENSDART00000052636	19	1	1	GTCATCCACTGAGCTTTGCGAATAA	7	-	165	1131
ENSDARG00000005628	ENSDART00000052636	19	1	1	GTCAAATTAGAGCCGGTTTTGGCA	6	-	69	1131
ENSDARG00000005628	ENSDART00000052636	19	1	1	GTCAAATTAGAGCCGGTTTTGGC	5	-	70	1131
ENSDARG00000005628	ENSDART00000052636	19	3	3	GCAGACTGCCCGTTGCTGCAGCA	5	-	708	1131
ENSDARG00000005628	ENSDART00000052636	19	3	3	AAACTATCCAGCGAGCGCAGGGGAT	7	-	827	1131
ENSDARG00000005628	ENSDART00000052636	19	3	3	TCCAAAGACACCGAAGATGATTTG	6	-	1089	1131
ENSDARG00000005628	ENSDART00000052636	19	3	3	GTCCAAAGACACCGAAGATGATTTG	7	-	1089	1131
ENSDARG00000005628	ENSDART00000052636	19	3	3	CACTGCTTAGTGGAGAATAGTAA	5	-	762	1131
ENSDARG00000005628	ENSDART00000052636	19	3	3	CTATCCAGCGAGCGCAGGGGATTTG	7	-	824	1131
ENSDARG00000005628	ENSDART00000052636	19	3	3	GAAGGCCTCAGTCCTGGTCGTGGGC	7	-	1038	1131
ENSDARG00000005628	ENSDART00000052636	19	3	3	GTAAAAGGCGGGGTCGGCAGGATGC	7	-	666	1131
ENSDARG00000005628	ENSDART00000052636	19	3	3	GCCTCAGTCCTGGTCGTGGGCGAAC	7	-	1034	1131
ENSDARG00000005628	ENSDART00000052636	19	3	3	GCCTCAGTCCTGGTCGTGGGCGAA	6	-	1035	1131
ENSDARG00000005834	ENSDART00000033362	19	3	3	AAAACCGGCGAGGAGCGGCAGCA	5	+	496	1935
ENSDARG00000005834	ENSDART00000033362	19	4	4	TGCCCCATCGTCAGTGCAGCCGTC	6	+	642	1935
ENSDARG00000005834	ENSDART00000033362	19	5	5	CTCCTCCACAGGTGGTCTGGGTA	5	+	882	1935
ENSDARG00000005834	ENSDART00000033362	19	5	5	CGCTCCTCCACAGGTGGTCTGGGTA	7	+	880	1935
ENSDARG00000005834	ENSDART00000033362	19	5	5	TCCTCCACAGGTGGTCTGGGTAA	5	+	883	1935
ENSDARG00000005834	ENSDART00000033362	19	5	5	CTCCTCCACAGGTGGTCTGGGTAA	6	+	882	1935
ENSDARG00000005834	ENSDART00000033362	19	6	6	GGCGTCAGCGGGGTTGGTGCCGTT	6	+	1030	1935
ENSDARG00000005834	ENSDART00000033362	19	6	6	GCAGGCGGCAGGAGCAGCTGGCGTC	7	+	999	1935
ENSDARG00000005834	ENSDART00000033362	19	6	6	TCCAGCGCCTCCAGCGTGGCTTCT	6	+	1069	1935
ENSDARG00000005834	ENSDART00000033362	19	6	6	CCCTGCGCAAACAGCTGGAGAAGAC	7	+	1133	1935
ENSDARG00000005834	ENSDART00000033362	19	6	6	ACAGGCTGCCAGCCAGCAGGTGGG	6	+	921	1935
ENSDARG00000005834	ENSDART00000033362	19	7	7	GAAAAACGCTTTCGTTAAGGCTCT	6	+	1452	1935
ENSDARG00000005834	ENSDART00000033362	19	9	9	ACAGGCAGCTCTACAGCGGGGTCT	6	+	1611	1935
ENSDARG00000005834	ENSDART00000033362	19	9	9	TCCAGCTCCGCACGGGGGGTTCT	5	+	1636	1935
ENSDARG00000005834	ENSDART00000033362	19	9	9	ACCCCAGCACGACAGCCGCAGGC	5	+	1770	1935
ENSDARG00000005834	ENSDART00000033362	19	9	9	AGCGGCGGCGGCACCAGCAGCAGTC	7	+	1744	1935
ENSDARG00000005834	ENSDART00000033362	19	9	9	GGCGGCGGCACCAGCAGCAGTCGAC	7	+	1747	1935
ENSDARG00000005834	ENSDART00000033362	19	9	9	GGCAGCAGCAGTTCCAGCGGCGGCG	7	+	1729	1935
ENSDARG00000005834	ENSDART00000033362	19	9	9	GACCCCAGCACGACAGCCGCAGGC	6	+	1769	1935
ENSDARG00000005901	ENSDART00000013972	19	1	1	TCCATCATCATCAATGCTGGATTG	6	+	112	1794
ENSDARG00000005901	ENSDART00000013972	19	1	1	ATCATCATCAATGCTGGATTGTAG	6	+	115	1794
ENSDARG00000005901	ENSDART00000013972	19	1	1	AGCCTCTTCCCTGAGGAGAATGC	5	+	16	1794
ENSDARG00000005901	ENSDART00000013972	19	4	4	CTCAAAGTCACTGGAGGATGGTGAG	7	+	418	1794
ENSDARG00000005901	ENSDART00000013972	19	4	4	TCCCTCAAAGTCACTGGAGGATGGT	7	+	415	1794
ENSDARG00000005901	ENSDART00000013972	19	6	6	AGAGCCGCAGCTGGTGCTGTTTGC	6	+	573	1794
ENSDARG00000005901	ENSDART00000013972	19	7	7	ACACACCTCAACACTAGCTGCGTTT	7	+	853	1794
ENSDARG00000005901	ENSDART00000013972	19	9	9	TTCCTCGGCTCGTGTCGGGTTTGCC	7	+	910	1794
ENSDARG00000005901	ENSDART00000013972	19	10	10	ATCCTAACCTGAGCAGCATGGGTT	6	+	1061	1794
ENSDARG00000005901	ENSDART00000013972	19	15	15	AGCCTCACCTTCCCTGGGATGGT	5	+	1681	1794
ENSDARG00000005901	ENSDART00000013972	19	15	15	AGCCTCACCTTCCCTGGGATGGTGC	7	+	1681	1794
ENSDARG00000005901	ENSDART00000013972	19	15	15	CTCACCTTCCCTGGGATGGTGCT	5	+	1684	1794
ENSDARG00000005901	ENSDART00000013972	19	16	16	AGCCCAGCCAACAGTGGGAGCTGGA	7	+	1772	1794
ENSDARG00000005901	ENSDART00000013972	19	16	16	AGCAGCCCAGCCAACAGTGGGAGCT	7	+	1769	1794
ENSDARG00000005901	ENSDART00000051914	19	2	2	TCCCTCAAAGTCACTGGAGGATGGT	7	+	142	573
ENSDARG00000005901	ENSDART00000051914	19	2	2	CTCAAAGTCACTGGAGGATGGTGAG	7	+	145	573
ENSDARG00000005901	ENSDART00000051914	19	4	4	AGAGCCGCAGCTGGTGCTGTTTGC	6	+	300	573
ENSDARG00000005901	ENSDART00000051914	19	5	5	AGCTACAGATGTCAGCATAGTGT	5	+	397	573
ENSDARG00000005901	ENSDART00000063023	19	1	1	CTCAAAGTCACTGGAGGATGGTGAG	7	+	133	540
ENSDARG00000005901	ENSDART00000063023	19	1	1	TCCCTCAAAGTCACTGGAGGATGGT	7	+	130	540
ENSDARG00000005901	ENSDART00000063023	19	3	3	AGCTACAGATGTCAGCATAGTGT	5	+	348	540
ENSDARG00000005926	ENSDART00000003167	19	1	1	ATCGTCCTCTTGTGTGCTAGGGG	5	-	14	723
ENSDARG00000005926	ENSDART00000003167	19	4	4	ACCTTCCACAGATCCTGCGGACTAG	7	-	418	723
ENSDARG00000005926	ENSDART00000003167	19	6	6	GACGTCTGCCTGTGGTAAGACTCT	6	-	576	723
ENSDARG00000006290	ENSDART00000012167	19	2	1	GAAGGCCGCCCGCTTGCGAGGCT	5	-	83	318
ENSDARG00000006290	ENSDART00000012167	19	3	2	GACAGCGGCTCCCCTTTGCCTGT	5	-	304	318
ENSDARG00000006290	ENSDART00000012167	19	3	2	TTAATCATCTTTTCTTTCTGCGTGC	7	-	248	318
ENSDARG00000006640	ENSDART00000007206	19	1	1	CACCAATAATAGCCCGGGGTCAAC	6	+	90	1980
ENSDARG00000006640	ENSDART00000007206	19	1	1	GAAAGCATCCTCCCTGGCGCATCT	6	+	19	1980
ENSDARG00000006640	ENSDART00000007206	19	1	1	CTCTCAACCGAGTTCTGACGTGGCC	7	+	351	1980
ENSDARG00000006640	ENSDART00000007206	19	2	2	GACTGCGCATTATAATGTGTTTGTG	7	+	765	1980
ENSDARG00000006640	ENSDART00000007206	19	2	2	GACTGCGCATTATAATGTGTTTGT	6	+	765	1980
ENSDARG00000006640	ENSDART00000007206	19	4	4	CTCGGCTTCACATTGTGGAGGTGAC	7	+	1031	1980
ENSDARG00000006640	ENSDART00000007206	19	4	4	CTCGGCTTCACATTGTGGAGGTG	5	+	1031	1980
ENSDARG00000006640	ENSDART00000007206	19	4	4	AGCCTCGGCTTCACATTGTGGAGGT	7	+	1028	1980
ENSDARG00000006640	ENSDART00000007206	19	14	14	TTCACCCACTATAAAGTGTGAGGA	6	+	1896	1980
ENSDARG00000006640	ENSDART00000007206	19	14	14	TTCACCCACTATAAAGTGTGAGGAC	7	+	1896	1980
ENSDARG00000006926	ENSDART00000023255	19	1	1	CCCTCCGTCTTATGTGGCGGCGGTG	7	+	96	1560
ENSDARG00000006926	ENSDART00000023255	19	1	1	CCCTCCGTCTTATGTGGCGGCGGT	6	+	96	1560
ENSDARG00000006926	ENSDART00000023255	19	1	1	AGCTCCTCCTCCAGGCCGCGGAC	5	+	74	1560
ENSDARG00000006926	ENSDART00000023255	19	1	1	TCCGTCTTATGTGGCGGCGGTGTA	6	+	99	1560
ENSDARG00000006926	ENSDART00000023255	19	1	1	TCCGTCTTATGTGGCGGCGGTGTAC	7	+	99	1560
ENSDARG00000006926	ENSDART00000023255	19	1	1	CTAATCTCCGGGTGCTGGAGGAGCA	7	+	197	1560
ENSDARG00000006926	ENSDART00000023255	19	3	3	TCCCCCTGCTGGCAGCGGTGCAGAT	7	+	764	1560
ENSDARG00000006926	ENSDART00000023255	19	3	3	TGCAGCGGCTCCGTTTGCTGCCAAC	7	+	1186	1560
ENSDARG00000006926	ENSDART00000023255	19	3	3	CAATCATTCGCACATGCAGCGGGC	6	+	793	1560
ENSDARG00000006926	ENSDART00000023255	19	3	3	AGCTCCCCCTGCTGGCAGCGGTG	5	+	761	1560
ENSDARG00000006926	ENSDART00000023255	19	3	3	AGCAGCTAACATCAAAGCTGCGGAG	7	+	828	1560
ENSDARG00000006926	ENSDART00000023255	19	3	3	AAAGACGCACGTTTGGTCTTTGAG	6	+	1044	1560
ENSDARG00000007065	ENSDART00000023074	19	1	1	CAACAAACCTGTGCTTGAAGATGTC	7	-	74	732
ENSDARG00000007065	ENSDART00000023074	19	1	1	TCCCAATGCGTTGTAAGGAGGCTGC	7	-	13	732
ENSDARG00000007065	ENSDART00000023074	19	2	2	GTTATCAGCAGATGAAGATGATGCA	7	-	150	732
ENSDARG00000007065	ENSDART00000023074	19	3	3	GTACTCACAATACAGGTTTTTCT	5	-	322	732
ENSDARG00000007065	ENSDART00000023074	19	8	8	TACAGCACCATGAGTGTTTGAATAG	7	-	585	732
ENSDARG00000007065	ENSDART00000073709	19	1	1	CAACAAACCTGTGCTTGAAGATGTC	7	-	74	726
ENSDARG00000007065	ENSDART00000073709	19	1	1	TCCCAATGCGTTGTAAGGAGGCTGC	7	-	13	726
ENSDARG00000007065	ENSDART00000073709	19	2	2	GTTATCAGCAGATGAAGATGATGCA	7	-	150	726
ENSDARG00000007065	ENSDART00000073709	19	3	3	GTACTCACAATACAGGTTTTTCT	5	-	322	726
ENSDARG00000007065	ENSDART00000073709	19	7	7	TACAGCACCATGAGTGTTTGAATAG	7	-	579	726
ENSDARG00000007136	ENSDART00000037169	19	1	1	TCCTCCATCCCCGCTTCTGTTTTT	6	-	121	1317
ENSDARG00000007136	ENSDART00000037169	19	1	1	CTCCACCGCTTCCGTGTTGTCGGT	6	-	166	1317
ENSDARG00000007136	ENSDART00000037169	19	1	1	CACCGCTTCCGTGTTGTCGGTTTT	6	-	163	1317
ENSDARG00000007136	ENSDART00000037169	19	5	5	GCATACCTCTAAGATGTGGTTGAA	6	-	766	1317
ENSDARG00000007136	ENSDART00000037169	19	6	6	CCCCACCCCGCCTCCCTGTGTTTCT	7	-	1067	1317
ENSDARG00000007136	ENSDART00000037169	19	6	6	CGCCTATTATACTGCCGACGTCGCT	7	-	1204	1317
ENSDARG00000007136	ENSDART00000037169	19	6	6	CAAATCAGAGGCTATGGTTTGCA	5	-	1145	1317
ENSDARG00000007136	ENSDART00000037169	19	7	7	ACAAACTAACACTTCTGTGGTGCT	6	-	1304	1317
ENSDARG00000007186	ENSDART00000003164	19	1	1	CACAAACACAACAGGCTTTGACTGC	7	+	27	1053
ENSDARG00000007186	ENSDART00000003164	19	1	1	ACAAACACAACAGGCTTTGACTGC	6	+	28	1053
ENSDARG00000007186	ENSDART00000003164	19	3	3	AGACACCTCAAGAGGGTGTTTCT	5	+	235	1053
ENSDARG00000007186	ENSDART00000003164	19	3	3	ACAGACACCTCAAGAGGGTGTTTCT	7	+	233	1053
ENSDARG00000007186	ENSDART00000003164	19	5	5	ACACTCACCATTGAAGAGGGAAAC	6	+	535	1053
ENSDARG00000007186	ENSDART00000003164	19	5	5	CACTCACCATTGAAGAGGGAAAC	5	+	536	1053
ENSDARG00000007186	ENSDART00000003164	19	6	6	CGCTTCAGAAACATGGTGCAGAC	5	+	661	1053
ENSDARG00000007186	ENSDART00000003164	19	7	7	GTCTCACCCACCACTGTGCAGCC	5	+	913	1053
ENSDARG00000007186	ENSDART00000003164	19	7	7	GCCGCCCACCAGCCATGAAGCAGGA	7	+	801	1053
ENSDARG00000007186	ENSDART00000003164	19	7	7	CGCCCACCAGCCATGAAGCAGGA	5	+	803	1053
ENSDARG00000007186	ENSDART00000003164	19	7	7	CCCCAACCCTGCTCCAGAGGTGGAC	7	+	888	1053
ENSDARG00000007186	ENSDART00000003164	19	7	7	CCCACCAGCCATGAAGCAGGAGGG	6	+	805	1053
ENSDARG00000007186	ENSDART00000003164	19	7	7	AACTTCCCCCTCAGCGGAGGGCTTT	7	+	766	1053
ENSDARG00000007186	ENSDART00000003164	19	7	7	CAACCCTGCTCCAGAGGTGGACGTC	7	+	891	1053
ENSDARG00000007597	ENSDART00000002547	19	1	1	CGCTCACCATAGACAGGCTGCTGGC	7	-	106	708
ENSDARG00000007597	ENSDART00000002547	19	1	1	TTCTTCAGCATTGGCTCTGATGTA	6	-	289	708
ENSDARG00000007597	ENSDART00000002547	19	2	2	CTCGTCAACTCTTGTTAGCATTT	5	-	344	708
ENSDARG00000007597	ENSDART00000002547	19	3	3	CTCTTCAGATTTTCTTTGTATCT	5	-	431	708
ENSDARG00000007597	ENSDART00000002547	19	4	4	GGCTCCAACCATTTTGACGAAGGC	6	-	490	708
ENSDARG00000007609	ENSDART00000026989	19	1	1	GGCTGCTGCTGCAGCGGGTGATTC	6	+	207	942
ENSDARG00000007609	ENSDART00000026989	19	1	1	GGCTGCTGCTGCAGCGGGTGATTCT	7	+	207	942
ENSDARG00000007609	ENSDART00000026989	19	1	1	GTCCCACCACCATGGGAGTGGTG	5	+	330	942
ENSDARG00000007609	ENSDART00000026989	19	1	1	TACTTCTCCGCCCGCGCTGGATTG	6	+	23	942
ENSDARG00000007609	ENSDART00000026989	19	1	1	TCCCACCACCATGGGAGTGGTGGAG	7	+	331	942
ENSDARG00000007609	ENSDART00000026989	19	1	1	TTATCCGTCCAGCGAAGTGGCTGCT	7	+	189	942
ENSDARG00000007609	ENSDART00000026989	19	1	1	GCAATCACAACCAGTGGATGGAAC	6	+	607	942
ENSDARG00000007609	ENSDART00000026989	19	1	1	AGCTCACGCGCCAAGGAGTTTGC	5	+	448	942
ENSDARG00000007609	ENSDART00000026989	19	1	1	ACCAGCAAAAATATGGAAGGGTTC	6	+	91	942
ENSDARG00000007609	ENSDART00000026989	19	1	1	CGCCAAGCCCGTGCAGGAATTTGAT	7	+	131	942
ENSDARG00000007609	ENSDART00000026989	19	1	1	CCCACCACCATGGGAGTGGTGGAG	6	+	332	942
ENSDARG00000007609	ENSDART00000026989	19	1	1	CACATCAGCTTCTACAGGCGAAGAT	7	+	417	942
ENSDARG00000007609	ENSDART00000026989	19	1	1	AGCTCACGCGCCAAGGAGTTTGCC	6	+	448	942
ENSDARG00000007609	ENSDART00000026989	19	2	2	GACGGCAGCTCCTTCCGCCGCGGAA	7	+	718	942
ENSDARG00000007609	ENSDART00000026989	19	2	2	GGCAGCTCCTTCCGCCGCGGAAGGA	7	+	721	942
ENSDARG00000007730	ENSDART00000014699	19	1	1	CGCTGCATCTGCGCCATCTGTGTTC	7	+	523	1743
ENSDARG00000007730	ENSDART00000014699	19	1	1	CTCAGCATCAACCGAGTGTTTGCC	6	+	193	1743
ENSDARG00000007730	ENSDART00000014699	19	1	1	GCACACACCGCCTGCTGCCGCCGCA	7	+	428	1743
ENSDARG00000007730	ENSDART00000014699	19	1	1	GCACTCAAATACCAGCAGATGCG	5	+	223	1743
ENSDARG00000007730	ENSDART00000014699	19	1	1	GGCTGCGCAGGCCCGGCAGGAGAA	6	+	255	1743
ENSDARG00000007730	ENSDART00000014699	19	1	1	GTCTGCAGCGGCGTGAAGAAGCC	5	+	325	1743
ENSDARG00000007730	ENSDART00000014699	19	1	1	TGCAGCGGCGTGAAGAAGCCTGC	5	+	328	1743
ENSDARG00000007730	ENSDART00000014699	19	1	1	TGCGACACACACCTGCAGCCGCA	5	+	385	1743
ENSDARG00000007730	ENSDART00000014699	19	1	1	TGCGCCATCTGTGTTCTGGAGGA	5	+	532	1743
ENSDARG00000007730	ENSDART00000014699	19	1	1	CACGGCCGCCTGCTGGAGGTGTTC	6	+	484	1743
ENSDARG00000007730	ENSDART00000014699	19	1	1	CACGGCCGCCTGCTGGAGGTGTT	5	+	484	1743
ENSDARG00000007730	ENSDART00000014699	19	1	1	ACCTGCCGCGAGCACGGCCGCCTGC	7	+	472	1743
ENSDARG00000007730	ENSDART00000014699	19	1	1	ACACACCACTGTCTCTGTGCAGAC	6	+	564	1743
ENSDARG00000007730	ENSDART00000014699	19	1	1	ACACACCGCCTGCTGCCGCCGCA	5	+	430	1743
ENSDARG00000007730	ENSDART00000014699	19	2	2	AGAGGCTGCTGGGTAAGATGGAGTT	7	+	605	1743
ENSDARG00000007730	ENSDART00000014699	19	3	3	ATCCGCTCCGAGCTGGTGGGCGGCA	7	+	772	1743
ENSDARG00000007730	ENSDART00000014699	19	3	3	AGATACAGCCAGGCGGAGCAGGC	5	+	703	1743
ENSDARG00000007730	ENSDART00000014699	19	3	3	ATCCGCTCCGAGCTGGTGGGCGGC	6	+	772	1743
ENSDARG00000007730	ENSDART00000014699	19	4	4	AGCGGCCCCATGCAGGATGAGGC	5	+	952	1743
ENSDARG00000007730	ENSDART00000014699	19	4	4	GCCCCATGCAGGATGAGGCGGGG	5	+	956	1743
ENSDARG00000007730	ENSDART00000014699	19	4	4	GCCCCATGCAGGATGAGGCGGGGCA	7	+	956	1743
ENSDARG00000007730	ENSDART00000014699	19	4	4	AGCGGCCCCATGCAGGATGAGGCG	6	+	952	1743
ENSDARG00000007730	ENSDART00000014699	19	6	6	GTTGCCCACAGATCTGCGCAGGA	5	+	1170	1743
ENSDARG00000007730	ENSDART00000014699	19	9	9	ACCTGCGGCGGGTCGGGGTGTAC	5	+	1580	1743
ENSDARG00000007730	ENSDART00000014699	19	9	9	TACTGCTTCAGCGGGCCGCTGTC	5	+	1660	1743
ENSDARG00000007730	ENSDART00000014699	19	9	9	GTCACCTGCGGCGGGTCGGGGTG	5	+	1577	1743
ENSDARG00000007730	ENSDART00000014699	19	9	9	CTACTATGCCCTCTGGTGGAGCG	5	+	1500	1743
ENSDARG00000007730	ENSDART00000014699	19	9	9	CTACAATGCCAAGAGCGGCGCAGAG	7	+	1632	1743
ENSDARG00000007730	ENSDART00000102173	19	1	1	GCACTCAAATACCAGCAGATGCG	5	+	223	1236
ENSDARG00000007730	ENSDART00000102173	19	1	1	CTCAGCATCAACCGAGTGTTTGCC	6	+	193	1236
ENSDARG00000007730	ENSDART00000102173	19	3	3	AGAGGCTGCTGGGTAAGATGGAGTT	7	+	260	1236
ENSDARG00000007730	ENSDART00000102173	19	4	4	AGATACAGCCAGGCGGAGCAGGC	5	+	358	1236
ENSDARG00000007730	ENSDART00000102173	19	4	4	ATCCGCTCCGAGCTGGTGGGCGGC	6	+	427	1236
ENSDARG00000007730	ENSDART00000102173	19	4	4	ATCCGCTCCGAGCTGGTGGGCGGCA	7	+	427	1236
ENSDARG00000007730	ENSDART00000102173	19	9	9	GTCACCTGCGGCGGGTCGGGGTG	5	+	1121	1236
ENSDARG00000007730	ENSDART00000102173	19	9	9	TACTGCTTCAGCGGGCCGCTGTC	5	+	1204	1236
ENSDARG00000007730	ENSDART00000102173	19	9	9	CTACTATGCCCTCTGGTGGAGCG	5	+	1044	1236
ENSDARG00000007730	ENSDART00000102173	19	9	9	CTACAATGCCAAGAGCGGCGCAGAG	7	+	1176	1236
ENSDARG00000007730	ENSDART00000102173	19	9	9	ACCTGCGGCGGGTCGGGGTGTAC	5	+	1124	1236
ENSDARG00000007730	ENSDART00000102174	19	1	1	CACGGCCGCCTGCTGGAGGTGTT	5	+	502	1605
ENSDARG00000007730	ENSDART00000102174	19	1	1	CACGGCCGCCTGCTGGAGGTGTTC	6	+	502	1605
ENSDARG00000007730	ENSDART00000102174	19	1	1	CGCTGCATCTGCGCCATCTGTGTTC	7	+	541	1605
ENSDARG00000007730	ENSDART00000102174	19	1	1	GGCTGCGCAGGCCCGGCAGGAGAA	6	+	273	1605
ENSDARG00000007730	ENSDART00000102174	19	1	1	CTCAGCATCAACCGAGTGTTTGCC	6	+	211	1605
ENSDARG00000007730	ENSDART00000102174	19	1	1	GCACACACCGCCTGCTGCCGCCGCA	7	+	446	1605
ENSDARG00000007730	ENSDART00000102174	19	1	1	GCACTCAAATACCAGCAGATGCG	5	+	241	1605
ENSDARG00000007730	ENSDART00000102174	19	1	1	GTCTGCAGCGGCGTGAAGAAGCC	5	+	343	1605
ENSDARG00000007730	ENSDART00000102174	19	1	1	TGCAGCGGCGTGAAGAAGCCTGC	5	+	346	1605
ENSDARG00000007730	ENSDART00000102174	19	1	1	ACACACCACTGTCTCTGTGCAGAC	6	+	582	1605
ENSDARG00000007730	ENSDART00000102174	19	1	1	TGCGACACACACCTGCAGCCGCA	5	+	403	1605
ENSDARG00000007730	ENSDART00000102174	19	1	1	ACACACCGCCTGCTGCCGCCGCA	5	+	448	1605
ENSDARG00000007730	ENSDART00000102174	19	1	1	ACCTGCCGCGAGCACGGCCGCCTGC	7	+	490	1605
ENSDARG00000007730	ENSDART00000102174	19	1	1	TGCGCCATCTGTGTTCTGGAGGA	5	+	550	1605
ENSDARG00000007730	ENSDART00000102174	19	2	2	AGAGGCTGCTGGGTAAGATGGAGTT	7	+	623	1605
ENSDARG00000007730	ENSDART00000102174	19	3	3	ATCCGCTCCGAGCTGGTGGGCGGC	6	+	790	1605
ENSDARG00000007730	ENSDART00000102174	19	3	3	AGATACAGCCAGGCGGAGCAGGC	5	+	721	1605
ENSDARG00000007730	ENSDART00000102174	19	3	3	ATCCGCTCCGAGCTGGTGGGCGGCA	7	+	790	1605
ENSDARG00000007730	ENSDART00000102174	19	4	4	GCCCCATGCAGGATGAGGCGGGGCA	7	+	974	1605
ENSDARG00000007730	ENSDART00000102174	19	4	4	GCCCCATGCAGGATGAGGCGGGG	5	+	974	1605
ENSDARG00000007730	ENSDART00000102174	19	4	4	AGCGGCCCCATGCAGGATGAGGC	5	+	970	1605
ENSDARG00000007730	ENSDART00000102174	19	4	4	AGCGGCCCCATGCAGGATGAGGCG	6	+	970	1605
ENSDARG00000007730	ENSDART00000102174	19	5	5	GTTGCCCACAGATCTGCGCAGGA	5	+	1080	1605
ENSDARG00000007730	ENSDART00000102174	19	8	8	CTACAATGCCAAGAGCGGCGCAGAG	7	+	1542	1605
ENSDARG00000007730	ENSDART00000102174	19	8	8	ACCTGCGGCGGGTCGGGGTGTAC	5	+	1490	1605
ENSDARG00000007730	ENSDART00000102174	19	8	8	CTACTATGCCCTCTGGTGGAGCG	5	+	1410	1605
ENSDARG00000007730	ENSDART00000102174	19	8	8	GTCACCTGCGGCGGGTCGGGGTG	5	+	1487	1605
ENSDARG00000007730	ENSDART00000102174	19	8	8	TACTGCTTCAGCGGGCCGCTGTC	5	+	1570	1605
ENSDARG00000007730	ENSDART00000102179	19	2	2	CTCAGCATCAACCGAGTGTTTGCC	6	+	244	978
ENSDARG00000007730	ENSDART00000102179	19	2	2	GCACACACCGCCTGCTGCCGCCGCA	7	+	479	978
ENSDARG00000007730	ENSDART00000102179	19	2	2	GCACTCAAATACCAGCAGATGCG	5	+	274	978
ENSDARG00000007730	ENSDART00000102179	19	2	2	GGCTGCGCAGGCCCGGCAGGAGAA	6	+	306	978
ENSDARG00000007730	ENSDART00000102179	19	2	2	GTCTGCAGCGGCGTGAAGAAGCC	5	+	376	978
ENSDARG00000007730	ENSDART00000102179	19	2	2	TGCAGCGGCGTGAAGAAGCCTGC	5	+	379	978
ENSDARG00000007730	ENSDART00000102179	19	2	2	TGCGACACACACCTGCAGCCGCA	5	+	436	978
ENSDARG00000007730	ENSDART00000102179	19	2	2	TGCGCCATCTGTGTTCTGGAGGA	5	+	583	978
ENSDARG00000007730	ENSDART00000102179	19	2	2	CGCTGCATCTGCGCCATCTGTGTTC	7	+	574	978
ENSDARG00000007730	ENSDART00000102179	19	2	2	CACGGCCGCCTGCTGGAGGTGTTC	6	+	535	978
ENSDARG00000007730	ENSDART00000102179	19	2	2	ACACACCACTGTCTCTGTGCAGAC	6	+	615	978
ENSDARG00000007730	ENSDART00000102179	19	2	2	ACACACCGCCTGCTGCCGCCGCA	5	+	481	978
ENSDARG00000007730	ENSDART00000102179	19	2	2	ACCTGCCGCGAGCACGGCCGCCTGC	7	+	523	978
ENSDARG00000007730	ENSDART00000102179	19	2	2	CACGGCCGCCTGCTGGAGGTGTT	5	+	535	978
ENSDARG00000007730	ENSDART00000102179	19	3	3	AGAGGCTGCTGGGTAAGATGGAGTT	7	+	656	978
ENSDARG00000007730	ENSDART00000102179	19	4	4	AGATACAGCCAGGCGGAGCAGGC	5	+	754	978
ENSDARG00000007730	ENSDART00000102179	19	4	4	ATCCGCTCCGAGCTGGTGGGCGGC	6	+	823	978
ENSDARG00000007730	ENSDART00000102179	19	4	4	ATCCGCTCCGAGCTGGTGGGCGGCA	7	+	823	978
ENSDARG00000007863	ENSDART00000008595	19	2	2	TCCTGCCCAACCCAAGATGGAGAG	6	+	81	891
ENSDARG00000007863	ENSDART00000008595	19	2	2	GTCCAAATCGGATCGGGGGAGTC	5	+	60	891
ENSDARG00000007863	ENSDART00000008595	19	3	3	GCCCAATTCTAACCGCCGCAAAC	5	+	303	891
ENSDARG00000007863	ENSDART00000008595	19	3	3	CGCCGCAAACACGCTGGCAGTCGGG	7	+	316	891
ENSDARG00000007863	ENSDART00000008595	19	3	3	CCCGACGCAGAAGGAGCCGAAGTG	6	+	275	891
ENSDARG00000007863	ENSDART00000008595	19	4	4	AGATTCGCACAATCAGGGTGATGC	6	+	366	891
ENSDARG00000007863	ENSDART00000008595	19	5	5	CCCCAATACATGTCTTGGTGTGTTT	7	+	405	891
ENSDARG00000007863	ENSDART00000008595	19	7	7	GGCAGCAGCAGCGGTGGCCGGAGAC	7	+	724	891
ENSDARG00000007863	ENSDART00000008595	19	7	7	GGCGGCAGCAGCAGCGGTGGCCGGA	7	+	721	891
ENSDARG00000007863	ENSDART00000008595	19	7	7	GGCGGCGGCAGCAGCAGCGGTGGCC	7	+	718	891
ENSDARG00000007863	ENSDART00000008595	19	7	7	AGCAGCAGCGGTGGCCGGAGACGAG	7	+	727	891
ENSDARG00000007943	ENSDART00000003544	19	1	1	AGCCGCTTCCAACAGACGCTTTC	5	-	29	1221
ENSDARG00000007943	ENSDART00000003544	19	2	2	AGCTGCTAAATGTAATGGAGACGTT	7	-	123	1221
ENSDARG00000007943	ENSDART00000003544	19	3	3	ATCTTCAGCATGTCTTTAGCGTTG	6	-	300	1221
ENSDARG00000007943	ENSDART00000003544	19	5	5	GACCAAGTCCATTAGTCTGCAGGT	6	-	731	1221
ENSDARG00000007943	ENSDART00000003544	19	7	7	TGCTCCTGCTGGAGAGCTGCTGTG	6	-	1038	1221
ENSDARG00000007943	ENSDART00000003544	19	7	7	TCCTGCAGCTGCCACTGGAGATGCT	7	-	905	1221
ENSDARG00000007943	ENSDART00000003544	19	7	7	TCCTCCTCCCCCTCCGCTGTTTCT	6	-	1095	1221
ENSDARG00000007943	ENSDART00000003544	19	7	7	GCCTCCTGCTCTTTGCGGAGCAGCT	7	-	962	1221
ENSDARG00000007943	ENSDART00000003544	19	7	7	CTCGGCCTCCTGCTCTTTGCGGAG	6	-	967	1221
ENSDARG00000007943	ENSDART00000003544	19	7	7	CTCCTCCTCCCCCTCCGCTGTTTCT	7	-	1095	1221
ENSDARG00000007943	ENSDART00000104754	19	1	1	AGCCGCTTCCAACAGACGCTTTC	5	-	29	1221
ENSDARG00000007943	ENSDART00000104754	19	2	2	AGCTGCTAAATGTAATGGAGACGTT	7	-	123	1221
ENSDARG00000007943	ENSDART00000104754	19	3	3	ATCTTCAGCATGTCTTTAGCGTTG	6	-	300	1221
ENSDARG00000007943	ENSDART00000104754	19	5	5	GACCAAGTCCATTAGTCTGCAGGT	6	-	731	1221
ENSDARG00000007943	ENSDART00000104754	19	8	8	TGCTCCTGCTGGAGAGCTGCTGTG	6	-	1062	1221
ENSDARG00000007943	ENSDART00000104754	19	8	8	TCCTGCAGCTGCCACTGGAGATGCT	7	-	929	1221
ENSDARG00000007943	ENSDART00000104754	19	8	8	TCCTCCTCCCCCTCCGCTGTTTCT	6	-	1119	1221
ENSDARG00000007943	ENSDART00000104754	19	8	8	GCCTCCTGCTCTTTGCGGAGCAGCT	7	-	986	1221
ENSDARG00000007943	ENSDART00000104754	19	8	8	CTCGGCCTCCTGCTCTTTGCGGAG	6	-	991	1221
ENSDARG00000007943	ENSDART00000104754	19	8	8	CTCCTCCTCCCCCTCCGCTGTTTCT	7	-	1119	1221
ENSDARG00000007971	ENSDART00000026276	19	2	1	TACTCCGACAAATACGACGATGAC	6	+	31	237
ENSDARG00000007971	ENSDART00000026276	19	3	2	CAAGACCCATCTGATGTCTGAGAC	6	+	108	237
ENSDARG00000007971	ENSDART00000026276	19	3	2	TTCAGCAGAGTCAAGGATGGGTG	5	+	152	237
ENSDARG00000007971	ENSDART00000026276	19	3	2	TTCAGCAGAGTCAAGGATGGGTGC	6	+	152	237
ENSDARG00000008052	ENSDART00000010992	19	1	1	CGCAGCAGCATGAAGGAGGAGTTC	6	+	56	1011
ENSDARG00000008052	ENSDART00000010992	19	1	1	CGCAGCAGCATGAAGGAGGAGTT	5	+	56	1011
ENSDARG00000008052	ENSDART00000010992	19	3	3	AGCTGCTAAACTAAAGGAAGAAGAG	7	+	264	1011
ENSDARG00000008052	ENSDART00000010992	19	3	3	GAACTCACAGATGAAGAGGCAGAG	6	+	331	1011
ENSDARG00000008052	ENSDART00000010992	19	5	5	GACTCAGTCCCTGTCTGAAGTGGAT	7	+	537	1011
ENSDARG00000008052	ENSDART00000010992	19	8	8	AGAGGCAGAAGTCCATGGGTTTAC	6	+	908	1011
ENSDARG00000008052	ENSDART00000010992	19	8	8	AGACGCGCAGTATGGTGGAGAAGAT	7	+	872	1011
ENSDARG00000008052	ENSDART00000010992	19	8	8	ACCCACCTCTGAAGAGCAGAAGAA	6	+	930	1011
ENSDARG00000008052	ENSDART00000103843	19	1	1	CGCAGCAGCATGAAGGAGGAGTTC	6	+	56	999
ENSDARG00000008052	ENSDART00000103843	19	1	1	CGCAGCAGCATGAAGGAGGAGTT	5	+	56	999
ENSDARG00000008052	ENSDART00000103843	19	3	3	AGCTGCTAAACTAAAGGAAGAAGAG	7	+	264	999
ENSDARG00000008052	ENSDART00000103843	19	3	3	GAACTCACAGATGAAGAGGCAGAG	6	+	331	999
ENSDARG00000008052	ENSDART00000103843	19	5	5	GACTCAGTCCCTGTCTGAAGTGGAT	7	+	537	999
ENSDARG00000008052	ENSDART00000103843	19	11	11	AGAGGCAGAAGTCCATGGGTTTAC	6	+	896	999
ENSDARG00000008052	ENSDART00000103843	19	11	11	AGACGCGCAGTATGGTGGAGAAGAT	7	+	860	999
ENSDARG00000008052	ENSDART00000103843	19	11	11	ACCCACCTCTGAAGAGCAGAAGAA	6	+	918	999
ENSDARG00000008075	ENSDART00000014316	19	4	4	GAACCAATCCAGTGTGTTTGTGTTT	7	-	240	606
ENSDARG00000008075	ENSDART00000014316	19	4	4	AACCAATCCAGTGTGTTTGTGTTT	6	-	240	606
ENSDARG00000008075	ENSDART00000102904	19	5	5	AACCAATCCAGTGTGTTTGTGTTT	6	-	414	780
ENSDARG00000008075	ENSDART00000102904	19	5	5	GAACCAATCCAGTGTGTTTGTGTTT	7	-	414	780
ENSDARG00000008275	ENSDART00000015628	19	2	1	TCCAAATTATTTTGTGCAGACGGT	6	+	792	1800
ENSDARG00000008275	ENSDART00000015628	19	2	1	GCATCCAGCGTTTCGCTGACGCT	5	+	518	1800
ENSDARG00000008275	ENSDART00000015628	19	2	1	GCATCCAAATTATTTTGTGCAGAC	6	+	789	1800
ENSDARG00000008275	ENSDART00000015628	19	2	1	GAAGACTAAACCGAGAAGACTCT	5	+	29	1800
ENSDARG00000008275	ENSDART00000015628	19	2	1	CTCTGCAGAGCTTTGCCGATGTG	5	+	581	1800
ENSDARG00000008275	ENSDART00000015628	19	2	1	CACTACAGATAATGTGCAGTTTCT	6	+	402	1800
ENSDARG00000008275	ENSDART00000015628	19	3	2	CACCAAGTCAGAGTATGCCGTGTGT	7	+	1062	1800
ENSDARG00000008275	ENSDART00000015628	19	4	3	AGACACAAAATGGCTGTCTTGTTG	6	+	1204	1800
ENSDARG00000008275	ENSDART00000015628	19	5	4	GCCGTCAGCTCGCCAGCCGTGGCC	6	+	1336	1800
ENSDARG00000008275	ENSDART00000015628	19	7	6	GGCATCATCACGGGTGTAGCAGCG	6	+	1717	1800
ENSDARG00000008336	ENSDART00000048850	19	3	3	AGAATCAAAACCATACTGGGAGGCC	7	+	240	1194
ENSDARG00000008336	ENSDART00000048850	19	5	5	AAAAAAAACATTCATTAGGAGTA	5	+	306	1194
ENSDARG00000008336	ENSDART00000048850	19	8	8	TTCACCAGACTGCAATCTGATGAA	6	+	388	1194
ENSDARG00000008336	ENSDART00000048850	19	8	8	GCAGACAGCACATGGAGGTGTTC	5	+	368	1194
ENSDARG00000008336	ENSDART00000048850	19	13	13	TCCGCCATCGGGCCCCGGGGACGAG	7	+	742	1194
ENSDARG00000008336	ENSDART00000048850	19	13	13	TGCAGCAACTGAAGCGTCGGGTTG	6	+	617	1194
ENSDARG00000008336	ENSDART00000048850	19	14	14	GACTTCAGAGTCCAGCTGCAGTG	5	+	900	1194
ENSDARG00000008336	ENSDART00000048850	19	14	14	GCCCTCGCAGCGAGTGCAGCGGCG	6	+	1094	1194
ENSDARG00000008336	ENSDART00000048850	19	14	14	GGCTCCGGCTCTCTGGAGGGCTTC	6	+	1048	1194
ENSDARG00000008336	ENSDART00000048850	19	14	14	CCCGGCTCCGGCTCTCTGGAGGG	5	+	1045	1194
ENSDARG00000008503	ENSDART00000036854	19	1	1	TTCCACGCAGGAGCTGGTAGGGC	5	-	153	1593
ENSDARG00000008503	ENSDART00000036854	19	1	1	GCAACCGGCTCGTGTTGCCGGTGGA	7	-	109	1593
ENSDARG00000008503	ENSDART00000036854	19	2	2	TGCTCCGCACCTGTTGTGACTTT	5	-	438	1593
ENSDARG00000008503	ENSDART00000036854	19	2	2	CTCCGCACCTGTTGTGACTTTGAC	6	-	435	1593
ENSDARG00000008503	ENSDART00000036854	19	3	3	CACTCCAACATCCAGGAGTCTGC	5	-	576	1593
ENSDARG00000008503	ENSDART00000036854	19	5	5	TTCTCCAGCTCATGGTTGATGCC	5	-	907	1593
ENSDARG00000008503	ENSDART00000036854	19	6	6	TCCAGCATCTCGTCGGTGGAGTAC	6	-	1143	1593
ENSDARG00000008503	ENSDART00000036854	19	6	6	TCCAGCATCTCGTCGGTGGAGTA	5	-	1144	1593
ENSDARG00000008503	ENSDART00000036854	19	6	6	TACTGCTGCTGCGCTGTTGAGGGG	6	-	1007	1593
ENSDARG00000008503	ENSDART00000036854	19	6	6	TACTGCTGCTGCGCTGTTGAGGG	5	-	1008	1593
ENSDARG00000008503	ENSDART00000036854	19	6	6	CACGACTACTGCTGCTGCGCTGTT	6	-	1013	1593
ENSDARG00000008503	ENSDART00000036854	19	6	6	GACTACTGCTGCTGCGCTGTTGAG	6	-	1010	1593
ENSDARG00000008503	ENSDART00000036854	19	6	6	TGCTGCTGCGCTGTTGAGGGGGAA	6	-	1004	1593
ENSDARG00000008503	ENSDART00000036854	19	6	6	CTATACCACGACTACTGCTGCTGCG	7	-	1018	1593
ENSDARG00000008503	ENSDART00000036854	19	7	7	AACTGCTGCCACTGTCTGCAGGA	5	-	1173	1593
ENSDARG00000008503	ENSDART00000036854	19	8	8	TTCCTCGTCCTCCTGCTGGGAAC	5	-	1424	1593
ENSDARG00000008503	ENSDART00000036854	19	8	8	TTCTGCGGCTGTGAGCCGGATTC	5	-	1567	1593
ENSDARG00000008503	ENSDART00000036854	19	8	8	GGCGCCTCCTGCTGTTGGGATGGT	6	-	1539	1593
ENSDARG00000008503	ENSDART00000036854	19	8	8	GCCTCCTGCTGTTGGGATGGTGAC	6	-	1536	1593
ENSDARG00000008503	ENSDART00000036854	19	8	8	GACTTCAAAGTTCTGCGGCTGTG	5	-	1577	1593
ENSDARG00000008503	ENSDART00000036854	19	8	8	GAATGCAGAGCCGGTGGGGATGAA	6	-	1360	1593
ENSDARG00000008680	ENSDART00000024140	19	2	2	TGCTCCAGAAACTTCTGTGCCGCC	6	-	66	606
ENSDARG00000008680	ENSDART00000024140	19	4	4	CCCGCCACACACTGAGATGCGGAG	6	-	330	606
ENSDARG00000008680	ENSDART00000024140	19	4	4	CGCCACACACTGAGATGCGGAGCT	6	-	328	606
ENSDARG00000008680	ENSDART00000024140	19	4	4	GCCCGCCACACACTGAGATGCGGAG	7	-	330	606
ENSDARG00000008680	ENSDART00000024140	19	6	6	TGCAAAACAAATAAAGGAGAATAA	6	-	555	606
ENSDARG00000008680	ENSDART00000024140	19	6	6	TCCATCTGCACCGCTGGGTTTGGCA	7	-	589	606
ENSDARG00000008680	ENSDART00000024140	19	6	6	TCCATCTGCACCGCTGGGTTTGGC	6	-	590	606
ENSDARG00000008680	ENSDART00000102073	19	2	2	TGCTCCAGAAACTTCTGTGCCGCC	6	-	66	2628
ENSDARG00000008680	ENSDART00000102073	19	4	4	GCCCGCCACACACTGAGATGCGGAG	7	-	330	2628
ENSDARG00000008680	ENSDART00000102073	19	4	4	CCCGCCACACACTGAGATGCGGAG	6	-	330	2628
ENSDARG00000008680	ENSDART00000102073	19	4	4	CGCCACACACTGAGATGCGGAGCT	6	-	328	2628
ENSDARG00000008680	ENSDART00000102073	19	5	5	TCCTCATGCCCTGGATGATGGCGGT	7	-	532	2628
ENSDARG00000008680	ENSDART00000102073	19	6	6	ACCACCTGCATGATGAAGTGTCT	5	-	652	2628
ENSDARG00000008680	ENSDART00000102073	19	6	6	ACACACCACCTGCATGATGAAGTG	6	-	655	2628
ENSDARG00000008680	ENSDART00000102073	19	6	6	CACACCACCTGCATGATGAAGTG	5	-	655	2628
ENSDARG00000008680	ENSDART00000102073	19	10	10	ACATCATCCTCACAGCAGGTGGC	5	-	1075	2628
ENSDARG00000008680	ENSDART00000102073	19	10	10	CACATCATCCTCACAGCAGGTGGC	6	-	1075	2628
ENSDARG00000008680	ENSDART00000102073	19	11	11	TTCATCAGCTCGATCAGCGTGGGCA	7	-	1238	2628
ENSDARG00000008680	ENSDART00000102073	19	11	11	CGCACCACCACACTGGGGTCTTT	5	-	1261	2628
ENSDARG00000008680	ENSDART00000102073	19	11	11	CCCAGCAGACGTTGGAGGCGACGCG	7	-	1402	2628
ENSDARG00000008680	ENSDART00000102073	19	11	11	TACCCAGCAGACGTTGGAGGCGAC	6	-	1405	2628
ENSDARG00000008680	ENSDART00000102073	19	11	11	TTACCCAGCAGACGTTGGAGGCGAC	7	-	1405	2628
ENSDARG00000008680	ENSDART00000102073	19	11	11	AGATACACCTCATTGATGGCGGC	5	-	1333	2628
ENSDARG00000008680	ENSDART00000102073	19	13	13	CGCTGCGCAGGTTATTCTGGTGCC	6	-	1565	2628
ENSDARG00000008680	ENSDART00000102073	19	15	15	CCCTCCACCAGTGTGCTGACGGC	5	-	1900	2628
ENSDARG00000008680	ENSDART00000102073	19	15	15	CACGCCTCCGGAGCCGGCGGTGCT	6	-	1858	2628
ENSDARG00000008680	ENSDART00000102073	19	15	15	GCACGCCTCCGGAGCCGGCGGTGCT	7	-	1858	2628
ENSDARG00000008680	ENSDART00000102073	19	15	15	ACCCTCCACCAGTGTGCTGACGGC	6	-	1900	2628
ENSDARG00000008680	ENSDART00000102073	19	15	15	CTCACCCTCCACCAGTGTGCTGAC	6	-	1903	2628
ENSDARG00000008680	ENSDART00000102073	19	15	15	ACCTTCCTCAGCACGTTCTGCAGGA	7	-	1769	2628
ENSDARG00000008680	ENSDART00000102073	19	15	15	ATCACCACATCCGAGATCTGCAGCG	7	-	1808	2628
ENSDARG00000008680	ENSDART00000102073	19	15	15	CACCACATCCGAGATCTGCAGCG	5	-	1808	2628
ENSDARG00000008680	ENSDART00000102073	19	17	17	ACACCCAGATTCTCCAGCAGCAGCT	7	-	2090	2628
ENSDARG00000008680	ENSDART00000102073	19	17	17	TTCTCCAGCAGCAGCTGCATGATTT	7	-	2081	2628
ENSDARG00000008680	ENSDART00000102073	19	18	18	AAACACAGACAGAATCTGGGGCTTG	7	-	2136	2628
ENSDARG00000008680	ENSDART00000102073	19	18	18	AAACACAGACAGAATCTGGGGCT	5	-	2138	2628
ENSDARG00000008680	ENSDART00000102073	19	19	19	TCCCCCTTCAGGCCCTGGATGATGC	7	-	2321	2628
ENSDARG00000008680	ENSDART00000102073	19	20	20	GTCCTCGTCCTCTGCGATGTGGTG	6	-	2413	2628
ENSDARG00000008680	ENSDART00000102073	19	20	20	CTCGTCCTCTGCGATGTGGTGAA	5	-	2411	2628
ENSDARG00000008680	ENSDART00000102073	19	21	21	ACATCCTTCCCGAAGGTGGTGCA	5	-	2485	2628
ENSDARG00000008818	ENSDART00000024593	19	1	1	ACCAAACTCTGGACGCTGGTGGA	5	+	76	1605
ENSDARG00000008818	ENSDART00000024593	19	2	2	CACGTCTTCGACCAGGGCAGGTTTT	7	+	151	1605
ENSDARG00000008818	ENSDART00000024593	19	6	6	TCCAACAGAGTTCTGGGAGTGAAAC	7	+	613	1605
ENSDARG00000008818	ENSDART00000024593	19	9	9	CCCCGCCCACAGCCCTGAGGTGGAA	7	+	897	1605
ENSDARG00000008818	ENSDART00000024593	19	9	9	CCCGCCCACAGCCCTGAGGTGGAA	6	+	898	1605
ENSDARG00000008818	ENSDART00000024593	19	9	9	CACATCAAAGAAGAGCCGTCTAG	5	+	874	1605
ENSDARG00000008818	ENSDART00000024593	19	9	9	GCCCACAGCCCTGAGGTGGAAGAG	6	+	901	1605
ENSDARG00000008818	ENSDART00000024593	19	11	11	TCCATCGACAGCGGTTTAGAAAAC	6	+	1195	1605
ENSDARG00000008818	ENSDART00000024593	19	14	14	CCCTCAGCACCGACAGCAGCAGCA	6	+	1436	1605
ENSDARG00000008818	ENSDART00000024593	19	14	14	CCCCTCAGCACCGACAGCAGCAGCA	7	+	1435	1605
ENSDARG00000008818	ENSDART00000061264	19	1	1	ACCAAACTCTGGACGCTGGTGGA	5	+	76	1617
ENSDARG00000008818	ENSDART00000061264	19	2	2	CACGTCTTCGACCAGGGCAGGTTTT	7	+	151	1617
ENSDARG00000008818	ENSDART00000061264	19	6	6	TCCAACAGAGTTCTGGGAGTGAAAC	7	+	613	1617
ENSDARG00000008818	ENSDART00000061264	19	9	9	GCCCACAGCCCTGAGGTGGAAGAG	6	+	901	1617
ENSDARG00000008818	ENSDART00000061264	19	9	9	CCCGCCCACAGCCCTGAGGTGGAA	6	+	898	1617
ENSDARG00000008818	ENSDART00000061264	19	9	9	CCCCGCCCACAGCCCTGAGGTGGAA	7	+	897	1617
ENSDARG00000008818	ENSDART00000061264	19	9	9	CACATCAAAGAAGAGCCGTCTAG	5	+	874	1617
ENSDARG00000008818	ENSDART00000061264	19	11	11	TCCATCGACAGCGGTTTAGAAAAC	6	+	1195	1617
ENSDARG00000008818	ENSDART00000061264	19	14	14	CCCCTCAGCACCGACAGCAGCAGCA	7	+	1435	1617
ENSDARG00000008818	ENSDART00000061264	19	14	14	CCCTCAGCACCGACAGCAGCAGCA	6	+	1436	1617
ENSDARG00000008818	ENSDART00000082353	19	1	1	ACCAAACTCTGGACGCTGGTGGA	5	+	76	1539
ENSDARG00000008818	ENSDART00000082353	19	2	2	CACGTCTTCGACCAGGGCAGGTTTT	7	+	151	1539
ENSDARG00000008818	ENSDART00000082353	19	6	6	TCCAACAGAGTTCTGGGAGTGAAAC	7	+	613	1539
ENSDARG00000008818	ENSDART00000082353	19	9	9	CCCGCCCACAGCCCTGAGGTGGAA	6	+	898	1539
ENSDARG00000008818	ENSDART00000082353	19	9	9	CCCCGCCCACAGCCCTGAGGTGGAA	7	+	897	1539
ENSDARG00000008818	ENSDART00000082353	19	9	9	CACATCAAAGAAGAGCCGTCTAG	5	+	874	1539
ENSDARG00000008818	ENSDART00000082353	19	9	9	GCCCACAGCCCTGAGGTGGAAGAG	6	+	901	1539
ENSDARG00000008818	ENSDART00000082353	19	10	10	TCCATCGACAGCGGTTTAGAAAAC	6	+	1117	1539
ENSDARG00000008818	ENSDART00000082353	19	13	13	CCCTCAGCACCGACAGCAGCAGCA	6	+	1358	1539
ENSDARG00000008818	ENSDART00000082353	19	13	13	CCCCTCAGCACCGACAGCAGCAGCA	7	+	1357	1539
ENSDARG00000008832	ENSDART00000002464	19	1	1	GTAAAATTCCAATTTGTCGAATAA	6	-	17	1149
ENSDARG00000008832	ENSDART00000002464	19	3	3	ATCGTCCACTATGAACGAGGTGGGA	7	-	288	1149
ENSDARG00000008832	ENSDART00000002464	19	3	3	GAAGCCATCATCCAGACTTTGCA	5	-	437	1149
ENSDARG00000008832	ENSDART00000002464	19	3	3	ACCATCATCGTGCTGGAGGGGCT	5	-	415	1149
ENSDARG00000008832	ENSDART00000002464	19	3	3	TGCACCATCATCGTGCTGGAGGG	5	-	418	1149
ENSDARG00000008832	ENSDART00000002464	19	5	5	TGCGACAGCGGCAGTGGTAGTTGTT	7	-	769	1149
ENSDARG00000008859	ENSDART00000013497	19	2	2	CTCATCTTATTCTGCAGGAGCAGAC	7	+	260	1416
ENSDARG00000008859	ENSDART00000013497	19	2	2	AGCCTCATCTTATTCTGCAGGAGCA	7	+	257	1416
ENSDARG00000008859	ENSDART00000013497	19	2	2	TTATTCTGCAGGAGCAGACGAGGTA	7	+	266	1416
ENSDARG00000008859	ENSDART00000013497	19	3	3	CTCCTCGCACAGGCCGAGTTTGGG	6	+	373	1416
ENSDARG00000008859	ENSDART00000013497	19	3	3	GCACTCCTCGCACAGGCCGAGTTT	6	+	370	1416
ENSDARG00000008859	ENSDART00000013497	19	4	4	AGCCAAGCACAAGGCTCTGGAGGG	6	+	480	1416
ENSDARG00000008859	ENSDART00000013497	19	4	4	GTATCAGGCTCTGCAGCTGGTGTC	6	+	525	1416
ENSDARG00000008859	ENSDART00000013497	19	6	6	GTCTGCTGCCAGAACTGTGCTGCT	6	+	1216	1416
ENSDARG00000008859	ENSDART00000013497	19	6	6	GCCTGCTGCAGGAGAAGCTGCAGAA	7	+	1115	1416
ENSDARG00000008859	ENSDART00000013497	19	6	6	GCCGCCTGCTGCAGGAGAAGCTGCA	7	+	1112	1416
ENSDARG00000008859	ENSDART00000013497	19	6	6	GCCAGCAGAGCCGCCTGCTGCAGGA	7	+	1103	1416
ENSDARG00000008859	ENSDART00000013497	19	6	6	AGAGCCGCCTGCTGCAGGAGAAGCT	7	+	1109	1416
ENSDARG00000008859	ENSDART00000013497	19	6	6	CTCTCCGTCCCGGGAGCAGGAGGG	6	+	1059	1416
ENSDARG00000008859	ENSDART00000013497	19	6	6	AACATCAACCTGGGGAAGAAGTA	5	+	919	1416
ENSDARG00000008859	ENSDART00000013497	19	6	6	CGCCGCACATCTAAGGAAGTGTAC	6	+	955	1416
ENSDARG00000008859	ENSDART00000013497	19	6	6	AGCTGCAGAAGCTGAGGGAGGCTCT	7	+	1130	1416
ENSDARG00000008859	ENSDART00000013497	19	6	6	ACCAACGCCGTCATGATGCAGTA	5	+	850	1416
ENSDARG00000008859	ENSDART00000013497	19	6	6	AGAAGCTGCAGAAGCTGAGGGAGGC	7	+	1127	1416
ENSDARG00000008859	ENSDART00000013497	19	6	6	GACCAACGCCGTCATGATGCAGTA	6	+	849	1416
ENSDARG00000008920	ENSDART00000005255	19	1	1	GGCGGCGTCCAAGAAGGCAGGAGTA	7	+	12	324
ENSDARG00000008946	ENSDART00000026634	19	2	1	GAACTATGCCCTCCTGGTGCCTCT	6	+	84	798
ENSDARG00000008946	ENSDART00000026634	19	3	2	TGCAGCGGCAAGCTTTAGAAAAC	5	+	371	798
ENSDARG00000008946	ENSDART00000026634	19	3	2	GTCAAATACCGACAGACGCTTTC	5	+	220	798
ENSDARG00000008946	ENSDART00000026634	19	3	2	GCCTTCTGCAGTATTTTGGTGCC	5	+	529	798
ENSDARG00000008946	ENSDART00000026634	19	3	2	CTCTTCCACTCGGCTCTGGAGAA	5	+	433	798
ENSDARG00000008946	ENSDART00000026634	19	3	2	CGCACCAGAGAGCCGAGGCTGCT	5	+	761	798
ENSDARG00000008946	ENSDART00000026634	19	3	2	AGCCTCTTCTTGCTCATCTGGAGAT	7	+	605	798
ENSDARG00000008946	ENSDART00000026634	19	3	2	AGAGTCAGAAGCTCCAGGAGGAGCG	7	+	332	798
ENSDARG00000008946	ENSDART00000026634	19	3	2	AAAGACAGAGGGCCTTCTGCAGTA	6	+	518	798
ENSDARG00000008946	ENSDART00000026634	19	3	2	AAACGCACCAGAGAGCCGAGGCT	5	+	758	798
ENSDARG00000009045	ENSDART00000018232	19	1	1	AGCGCCCGCACCGGAGCAGCAGCC	6	+	528	945
ENSDARG00000009045	ENSDART00000018232	19	1	1	ACCAGCGCCCGCACCGGAGCAGCA	6	+	525	945
ENSDARG00000009045	ENSDART00000018232	19	2	2	GACTTCAGCTCTCACGGATGCTTAA	7	+	827	945
ENSDARG00000009161	ENSDART00000019843	19	1	1	CACCACTTCAGCCAGCATTGTGT	5	-	203	1035
ENSDARG00000009161	ENSDART00000019843	19	1	1	CACTTCAGCCAGCATTGTGTTTTT	6	-	199	1035
ENSDARG00000009161	ENSDART00000019843	19	2	2	AGCTGCTTAATGGCTTTCTGTTTCT	7	-	632	1035
ENSDARG00000009161	ENSDART00000019843	19	3	3	GTCCTCCACTGTTGTCTGTGTAGAA	7	-	684	1035
ENSDARG00000009161	ENSDART00000019843	19	3	3	GTCCTCCACTGTTGTCTGTGTAG	5	-	686	1035
ENSDARG00000009161	ENSDART00000052255	19	1	1	CACCACTTCAGCCAGCATTGTGT	5	-	218	1092
ENSDARG00000009161	ENSDART00000052255	19	1	1	CACTTCAGCCAGCATTGTGTTTTT	6	-	214	1092
ENSDARG00000009161	ENSDART00000052255	19	2	2	AGCTGCTTAATGGCTTTCTGTTTCT	7	-	647	1092
ENSDARG00000009161	ENSDART00000052255	19	3	3	GTCCTCCACTGTTGTCTGTGTAG	5	-	701	1092
ENSDARG00000009161	ENSDART00000052255	19	3	3	GTCCTCCACTGTTGTCTGTGTAGAA	7	-	699	1092
ENSDARG00000009175	ENSDART00000006198	19	4	4	GCAGTCAGCTCAGCCAGCTGGTGGA	7	+	293	1959
ENSDARG00000009175	ENSDART00000006198	19	4	4	AGCTCAGCCAGCTGGTGGATGAA	5	+	299	1959
ENSDARG00000009175	ENSDART00000006198	19	8	8	GCAGACAAAGATGATCTGATGGG	5	+	745	1959
ENSDARG00000009175	ENSDART00000006198	19	9	9	AGCCCCGCAGAGCTGGAGGGGCC	5	+	862	1959
ENSDARG00000009175	ENSDART00000006198	19	10	10	GCAGTCAGCACTATGCTTTGCTGGA	7	+	947	1959
ENSDARG00000009175	ENSDART00000006198	19	10	10	GAAAAACACTCAGCATTTTTTTGGT	7	+	1058	1959
ENSDARG00000009175	ENSDART00000006198	19	13	13	AAATCAAACATTTCCTAATGAGAG	6	+	1368	1959
ENSDARG00000009175	ENSDART00000006198	19	13	13	GACCAACACACTTCTTGGGCAGTT	6	+	1392	1959
ENSDARG00000009175	ENSDART00000006198	19	13	13	CTCCTCTGCTATTGTTAGCATAA	5	+	1347	1959
ENSDARG00000009175	ENSDART00000006198	19	13	13	ACCAACACACTTCTTGGGCAGTT	5	+	1393	1959
ENSDARG00000009175	ENSDART00000006198	19	13	13	ACACACTTCTTGGGCAGTTGCAGGT	7	+	1397	1959
ENSDARG00000009175	ENSDART00000006198	19	15	15	TTCAGCAGCTTTTGCTGGCGAGAAC	7	+	1565	1959
ENSDARG00000009175	ENSDART00000006198	19	16	16	GACAAACTCAAAAATGATGAAGGT	6	+	1684	1959
ENSDARG00000009175	ENSDART00000006198	19	17	17	TTCTCCGGCACATGGAAGCAGTC	5	+	1732	1959
ENSDARG00000009175	ENSDART00000006198	19	17	17	TCCGGCACATGGAAGCAGTCTGT	5	+	1735	1959
ENSDARG00000009175	ENSDART00000006198	19	18	18	TTCATCATCTGATGGTGGAAGTC	5	+	1925	1959
ENSDARG00000009175	ENSDART00000006198	19	18	18	ACACAAACCAAACTTTTGAATGC	5	+	1953	1959
ENSDARG00000009175	ENSDART00000006198	19	18	18	AAACACAAACCAAACTTTTGAATGC	7	+	1951	1959
ENSDARG00000009175	ENSDART00000047190	19	6	6	GCAGTCAGCTCAGCCAGCTGGTGGA	7	+	494	2163
ENSDARG00000009175	ENSDART00000047190	19	6	6	AGCTCAGCCAGCTGGTGGATGAA	5	+	500	2163
ENSDARG00000009175	ENSDART00000047190	19	10	10	GCAGACAAAGATGATCTGATGGG	5	+	946	2163
ENSDARG00000009175	ENSDART00000047190	19	11	11	AGCCCCGCAGAGCTGGAGGGGCC	5	+	1063	2163
ENSDARG00000009175	ENSDART00000047190	19	12	12	GCAGTCAGCACTATGCTTTGCTGGA	7	+	1148	2163
ENSDARG00000009175	ENSDART00000047190	19	12	12	GAAAAACACTCAGCATTTTTTTGGT	7	+	1259	2163
ENSDARG00000009175	ENSDART00000047190	19	15	15	CTCCTCTGCTATTGTTAGCATAA	5	+	1548	2163
ENSDARG00000009175	ENSDART00000047190	19	15	15	ACCAACACACTTCTTGGGCAGTT	5	+	1594	2163
ENSDARG00000009175	ENSDART00000047190	19	15	15	ACACACTTCTTGGGCAGTTGCAGGT	7	+	1598	2163
ENSDARG00000009175	ENSDART00000047190	19	15	15	AAATCAAACATTTCCTAATGAGAG	6	+	1569	2163
ENSDARG00000009175	ENSDART00000047190	19	15	15	GACCAACACACTTCTTGGGCAGTT	6	+	1593	2163
ENSDARG00000009175	ENSDART00000047190	19	17	17	TTCAGCAGCTTTTGCTGGCGAGAAC	7	+	1766	2163
ENSDARG00000009175	ENSDART00000047190	19	18	18	GACAAACTCAAAAATGATGAAGGT	6	+	1885	2163
ENSDARG00000009175	ENSDART00000047190	19	19	19	TTCTCCGGCACATGGAAGCAGTC	5	+	1936	2163
ENSDARG00000009175	ENSDART00000047190	19	19	19	TCCGGCACATGGAAGCAGTCTGT	5	+	1939	2163
ENSDARG00000009175	ENSDART00000047190	19	20	20	TTCATCATCTGATGGTGGAAGTC	5	+	2129	2163
ENSDARG00000009175	ENSDART00000047190	19	20	20	ACACAAACCAAACTTTTGAATGC	5	+	2157	2163
ENSDARG00000009175	ENSDART00000047190	19	20	20	AAACACAAACCAAACTTTTGAATGC	7	+	2155	2163
ENSDARG00000009194	ENSDART00000007058	19	4	4	GCCCCAGACTGCTTGATTATTGGAC	7	-	137	2856
ENSDARG00000009194	ENSDART00000007058	19	13	13	GGCATCAACAAGGCATTTGCATAC	6	-	555	2856
ENSDARG00000009194	ENSDART00000027056	19	26	26	ACCATCTCCACAGGCATCTGCATTC	7	-	1610	2019
ENSDARG00000009194	ENSDART00000086717	19	3	3	AGCTCCTTCTCCTGGTGGGCCTGC	6	-	139	2019
ENSDARG00000009194	ENSDART00000086717	19	3	3	CTCAGCTCCTTCTCCTGGTGGGCC	6	-	142	2019
ENSDARG00000009194	ENSDART00000086717	19	27	27	ACCATCTCCACAGGCATCTGCATTC	7	-	1655	2019
ENSDARG00000009194	ENSDART00000092100	19	13	13	TGCTTCAAAATGCCTGCTGGATTT	6	-	723	3243
ENSDARG00000009194	ENSDART00000092100	19	17	17	CTCAGCTCCTTCTCCTGGTGGGCC	6	-	976	3243
ENSDARG00000009194	ENSDART00000092100	19	17	17	AGCTCCTTCTCCTGGTGGGCCTGC	6	-	973	3243
ENSDARG00000009194	ENSDART00000102963	19	32	32	ACCATCTCCACAGGCATCTGCATTC	7	-	1877	2277
ENSDARG00000009194	ENSDART00000102973	19	34	34	TTAAAAAACTTTTAACTTTGTCTAA	7	-	1540	2523
ENSDARG00000009194	ENSDART00000102973	19	44	44	ACCATCTCCACAGGCATCTGCATTC	7	-	2240	2523
ENSDARG00000009194	ENSDART00000102981	19	26	26	ACCATCTCCACAGGCATCTGCATTC	7	-	1580	1983
ENSDARG00000009194	ENSDART00000102988	19	10	10	AGCTCCTTCTCCTGGTGGGCCTGC	6	-	472	3018
ENSDARG00000009194	ENSDART00000102988	19	10	10	CTCAGCTCCTTCTCCTGGTGGGCC	6	-	475	3018
ENSDARG00000009194	ENSDART00000103004	19	7	7	CTCAGCTCCTTCTCCTGGTGGGCC	6	-	391	3177
ENSDARG00000009194	ENSDART00000103004	19	7	7	CACTTCCCACTTCAGAGGGAGAG	5	-	318	3177
ENSDARG00000009194	ENSDART00000103004	19	7	7	AGCTCCTTCTCCTGGTGGGCCTGC	6	-	388	3177
ENSDARG00000009194	ENSDART00000103020	19	12	12	AGCTCCTTCTCCTGGTGGGCCTGC	6	-	694	2919
ENSDARG00000009194	ENSDART00000103020	19	12	12	CACTTCCCACTTCAGAGGGAGAG	5	-	624	2919
ENSDARG00000009194	ENSDART00000103020	19	12	12	CTCAGCTCCTTCTCCTGGTGGGCC	6	-	697	2919
ENSDARG00000009285	ENSDART00000034837	19	2	2	CTCAGCTACTGACTGAAGGCTGC	5	-	296	612
ENSDARG00000009285	ENSDART00000034837	19	3	3	TGCGTCTAATGGCTTTGTGGAAGGT	7	-	418	612
ENSDARG00000009285	ENSDART00000034837	19	3	3	TGCAGCTGCAGAGTGTTGCGTCTCT	7	-	587	612
ENSDARG00000009285	ENSDART00000034837	19	3	3	TGCAGCTGCAGAGTGTTGCGTCT	5	-	589	612
ENSDARG00000009285	ENSDART00000034837	19	3	3	GTCTTCACCCACCCAGTAGGAGTT	6	-	358	612
ENSDARG00000009285	ENSDART00000034837	19	3	3	GGCCGCGCATTTCCCTGTGCTTGT	6	-	476	612
ENSDARG00000009285	ENSDART00000034837	19	3	3	AGAGCCGCCGATGGTAAGGTGAA	5	-	548	612
ENSDARG00000009287	ENSDART00000011500	19	1	1	TTCTACATCTTTCTCTCTGGCGCG	6	-	43	1098
ENSDARG00000009287	ENSDART00000011500	19	2	2	GTTGCCACCATCTCGGCGCTGTC	5	-	224	1098
ENSDARG00000009287	ENSDART00000011500	19	2	2	CTCTTCCCACAAAGGTCTTTGCC	5	-	178	1098
ENSDARG00000009287	ENSDART00000011500	19	3	3	CAATCAGCCTGTAATCTGTGCGTGT	7	-	316	1098
ENSDARG00000009287	ENSDART00000011500	19	4	4	CACCTCACCAGCCTGACGCATGT	5	-	386	1098
ENSDARG00000009287	ENSDART00000011500	19	6	6	TCCCTCCGCTGATCTGCATTTGGT	6	-	990	1098
ENSDARG00000009287	ENSDART00000011500	19	6	6	TGCTGCTCCTGCTCTTAGCCTTC	5	-	696	1098
ENSDARG00000009287	ENSDART00000103747	19	1	1	TTCTACATCTTTCTCTCTGGCGCG	6	-	43	852
ENSDARG00000009287	ENSDART00000103747	19	2	2	CTCTTCCCACAAAGGTCTTTGCC	5	-	178	852
ENSDARG00000009287	ENSDART00000103747	19	5	5	TCCCTCCGCTGATCTGCATTTGGT	6	-	744	852
ENSDARG00000009287	ENSDART00000103747	19	5	5	TGCTGCTCCTGCTCTTAGCCTTC	5	-	450	852
ENSDARG00000009461	ENSDART00000006934	19	1	1	GCCAAATCCGATACGAATGAAAC	5	+	352	750
ENSDARG00000009461	ENSDART00000006934	19	1	1	GAAGTCTTCACAAACGGAGGATGTT	7	+	421	750
ENSDARG00000009461	ENSDART00000006934	19	1	1	GAAGTCTTCACAAACGGAGGATGT	6	+	421	750
ENSDARG00000009461	ENSDART00000006934	19	1	1	CTATACTACAGCCTGAAGTCTTC	5	+	407	750
ENSDARG00000009461	ENSDART00000006934	19	1	1	CGCAACCTCCAGTAGTTGGGGAT	5	+	254	750
ENSDARG00000009461	ENSDART00000006934	19	1	1	TGCCAAATCCGATACGAATGAAAC	6	+	351	750
ENSDARG00000009461	ENSDART00000006934	19	2	2	TTCCAAAACCGCAGGATGAAGAT	5	+	703	750
ENSDARG00000009461	ENSDART00000006934	19	2	2	TCCAAAACCGCAGGATGAAGATGAA	7	+	704	750
ENSDARG00000009461	ENSDART00000006934	19	2	2	CAAAACCGCAGGATGAAGATGAA	5	+	706	750
ENSDARG00000009511	ENSDART00000025847	19	2	2	GCAATCAACAAGATGGAAGTGGTG	6	+	194	702
ENSDARG00000009511	ENSDART00000025847	19	4	4	CGCTCAATCTGCACGCAGGAGCC	5	+	538	702
ENSDARG00000009511	ENSDART00000025847	19	4	4	GTCTACAGCCAGGTGTCTTTGCA	5	+	409	702
ENSDARG00000009594	ENSDART00000024308	19	1	1	TCCGACAGCTTTGAGCCGCAGTC	5	-	25	1776
ENSDARG00000009594	ENSDART00000024308	19	2	2	TCCCTCCACCATGCCTTGGTGGGCG	7	-	220	1776
ENSDARG00000009594	ENSDART00000024308	19	2	2	CCCTCCACCATGCCTTGGTGGGCG	6	-	220	1776
ENSDARG00000009594	ENSDART00000024308	19	4	4	GTTGGCATCGGTTCCTGTTGATGCG	7	-	448	1776
ENSDARG00000009594	ENSDART00000024308	19	5	5	GCCATCAGCAGCTGAAGTCTGGTTG	7	-	627	1776
ENSDARG00000009594	ENSDART00000024308	19	5	5	ATCTCAAGCAGCATGCGTTGCTTTT	7	-	548	1776
ENSDARG00000009594	ENSDART00000024308	19	5	5	GACCACAGCTCGACTGTGGATTC	5	-	984	1776
ENSDARG00000009594	ENSDART00000024308	19	5	5	GACCACAGCTCGACTGTGGATTCT	6	-	983	1776
ENSDARG00000009594	ENSDART00000024308	19	5	5	GCATTCTGCATCTCAAGCAGCATGC	7	-	557	1776
ENSDARG00000009594	ENSDART00000024308	19	5	5	ATCAGCAGCTGAAGTCTGGTTGT	5	-	626	1776
ENSDARG00000009594	ENSDART00000024308	19	6	6	CACCACCTCCCTGACAGCTGGTGTG	7	-	1275	1776
ENSDARG00000009594	ENSDART00000024308	19	6	6	ACCACCTCCCTGACAGCTGGTGTG	6	-	1275	1776
ENSDARG00000009594	ENSDART00000024308	19	7	7	CACCAACACTACAGCGGTGAAGAG	6	-	1561	1776
ENSDARG00000009594	ENSDART00000075641	19	2	2	GTTGGCATCGGTTCCTGTTGATGCG	7	-	154	1002
ENSDARG00000009594	ENSDART00000075641	19	2	2	GTCAACAGATGACATTGTTTAGAAC	7	-	251	1002
ENSDARG00000009594	ENSDART00000075641	19	6	6	CACCACCTCCCTGACAGCTGGTGTG	7	-	507	1002
ENSDARG00000009594	ENSDART00000075641	19	6	6	ACCACCTCCCTGACAGCTGGTGTG	6	-	507	1002
ENSDARG00000009594	ENSDART00000075641	19	7	7	CACCAACACTACAGCGGTGAAGAG	6	-	793	1002
ENSDARG00000009594	ENSDART00000104463	19	1	1	TCCCTCCACCATGCCTTGGTGGGCG	7	-	133	1656
ENSDARG00000009594	ENSDART00000104463	19	1	1	CCCTCCACCATGCCTTGGTGGGCG	6	-	133	1656
ENSDARG00000009594	ENSDART00000104463	19	3	3	GTTGGCATCGGTTCCTGTTGATGCG	7	-	361	1656
ENSDARG00000009594	ENSDART00000104463	19	4	4	GCATTCTGCATCTCAAGCAGCATGC	7	-	470	1656
ENSDARG00000009594	ENSDART00000104463	19	4	4	ATCTCAAGCAGCATGCGTTGCTTTT	7	-	461	1656
ENSDARG00000009594	ENSDART00000104463	19	4	4	GACCACAGCTCGACTGTGGATTC	5	-	897	1656
ENSDARG00000009594	ENSDART00000104463	19	4	4	GACCACAGCTCGACTGTGGATTCT	6	-	896	1656
ENSDARG00000009594	ENSDART00000104463	19	4	4	GCCATCAGCAGCTGAAGTCTGGTTG	7	-	540	1656
ENSDARG00000009594	ENSDART00000104463	19	4	4	ATCAGCAGCTGAAGTCTGGTTGT	5	-	539	1656
ENSDARG00000009594	ENSDART00000104463	19	6	6	CACCACCTCCCTGACAGCTGGTGTG	7	-	1155	1656
ENSDARG00000009594	ENSDART00000104463	19	6	6	ACCACCTCCCTGACAGCTGGTGTG	6	-	1155	1656
ENSDARG00000009594	ENSDART00000104463	19	7	7	CACCAACACTACAGCGGTGAAGAG	6	-	1441	1656
ENSDARG00000009594	ENSDART00000104466	19	2	2	TCCCTCCACCATGCCTTGGTGGGCG	7	-	178	1734
ENSDARG00000009594	ENSDART00000104466	19	2	2	CCCTCCACCATGCCTTGGTGGGCG	6	-	178	1734
ENSDARG00000009594	ENSDART00000104466	19	4	4	GTTGGCATCGGTTCCTGTTGATGCG	7	-	406	1734
ENSDARG00000009594	ENSDART00000104466	19	5	5	ATCTCAAGCAGCATGCGTTGCTTTT	7	-	506	1734
ENSDARG00000009594	ENSDART00000104466	19	5	5	GCATTCTGCATCTCAAGCAGCATGC	7	-	515	1734
ENSDARG00000009594	ENSDART00000104466	19	5	5	GACCACAGCTCGACTGTGGATTC	5	-	942	1734
ENSDARG00000009594	ENSDART00000104466	19	5	5	GACCACAGCTCGACTGTGGATTCT	6	-	941	1734
ENSDARG00000009594	ENSDART00000104466	19	5	5	GCCATCAGCAGCTGAAGTCTGGTTG	7	-	585	1734
ENSDARG00000009594	ENSDART00000104466	19	5	5	ATCAGCAGCTGAAGTCTGGTTGT	5	-	584	1734
ENSDARG00000009594	ENSDART00000104466	19	6	6	CACCACCTCCCTGACAGCTGGTGTG	7	-	1233	1734
ENSDARG00000009594	ENSDART00000104466	19	6	6	ACCACCTCCCTGACAGCTGGTGTG	6	-	1233	1734
ENSDARG00000009594	ENSDART00000104466	19	7	7	CACCAACACTACAGCGGTGAAGAG	6	-	1519	1734
ENSDARG00000009637	ENSDART00000011138	19	1	1	AAACGCACAGAGCGGAGGGATTC	5	+	15	573
ENSDARG00000009637	ENSDART00000011138	19	1	1	CAAGTCCACCCTAAAGCTGGAGTG	6	+	297	573
ENSDARG00000009637	ENSDART00000011138	19	3	3	TCCTGCAGAACGAGTGGCAGAGGGG	7	+	495	573
ENSDARG00000009770	ENSDART00000092911	19	2	2	AAAAGCAGCCAAGAGACGGAGCA	5	+	75	1674
ENSDARG00000009770	ENSDART00000092911	19	3	3	AACAACAGCAAGACCTGCAGCTGTC	7	+	241	1674
ENSDARG00000009770	ENSDART00000092911	19	3	3	AACCACGACAGACCTCTGGAGCT	5	+	541	1674
ENSDARG00000009770	ENSDART00000092911	19	4	4	AGACACAGAAAGACGTGCAGCAGAT	7	+	662	1674
ENSDARG00000009770	ENSDART00000092911	19	5	5	AGCAGCAGAGAAACAGGAGGAAGAG	7	+	855	1674
ENSDARG00000009770	ENSDART00000092911	19	6	6	ACACTCCCCATGCTGAAGACTTT	5	+	947	1674
ENSDARG00000009770	ENSDART00000092911	19	6	6	GAACACTCCCCATGCTGAAGACTTT	7	+	945	1674
ENSDARG00000009770	ENSDART00000092911	19	7	7	GAAAACCCATAATAGTCTGGAGGC	6	+	1032	1674
ENSDARG00000009770	ENSDART00000092911	19	7	7	AACCCATAATAGTCTGGAGGCTCT	6	+	1035	1674
ENSDARG00000009770	ENSDART00000092911	19	8	8	GTCTGCAGAGCTGAAGTTGATGCA	6	+	1107	1674
ENSDARG00000009770	ENSDART00000092911	19	9	9	AGCCGCAGCGGGTCGGTGTGTTTGT	7	+	1490	1674
ENSDARG00000009770	ENSDART00000092911	19	9	9	ATCTCATCCTGTCTGATGATGGA	5	+	1178	1674
ENSDARG00000009770	ENSDART00000092911	19	9	9	AGCCGCAGCGGGTCGGTGTGTTT	5	+	1490	1674
ENSDARG00000009770	ENSDART00000092911	19	9	9	GAAGCCGCAGCGGGTCGGTGTGTTT	7	+	1488	1674
ENSDARG00000009779	ENSDART00000024228	19	1	1	TGCAGCCCCTTCAGGCCGTTTGT	5	-	160	765
ENSDARG00000009779	ENSDART00000024228	19	1	1	CAAATCGACCGTCCAGCTGCAGCC	6	-	176	765
ENSDARG00000009779	ENSDART00000024228	19	1	1	AGCTCCTCCGGATCTGGGGTGGTC	6	-	225	765
ENSDARG00000009779	ENSDART00000024228	19	1	1	AGCTCCTCCGGATCTGGGGTGGT	5	-	226	765
ENSDARG00000009779	ENSDART00000024228	19	2	2	TCCTCACCCAGCTCTTGTTTTTGAG	7	-	643	765
ENSDARG00000009779	ENSDART00000024228	19	3	3	AAACTCCACGAACCCATGCTGAGGA	7	-	654	765
ENSDARG00000009890	ENSDART00000009012	19	1	1	TGCTGCAGCGGAGGGGGATGACGTG	7	+	1878	1926
ENSDARG00000009890	ENSDART00000009012	19	1	1	TGCCCCTCCTTGCTGCAGCGGAG	5	+	1868	1926
ENSDARG00000009890	ENSDART00000009012	19	1	1	TCCAAAATCGACTTAGGTTGTCTAG	7	+	389	1926
ENSDARG00000009890	ENSDART00000009012	19	1	1	GAACCCACCATGGAAGGAGTATGT	6	+	1114	1926
ENSDARG00000009890	ENSDART00000009012	19	1	1	AGATGCCCCTCCTTGCTGCAGCG	5	+	1865	1926
ENSDARG00000009890	ENSDART00000009012	19	1	1	AGAACCCACCATGGAAGGAGTATGT	7	+	1113	1926
ENSDARG00000009890	ENSDART00000009012	19	1	1	ACATCCAAAATCGACTTAGGTTGT	6	+	386	1926
ENSDARG00000009890	ENSDART00000009012	19	1	1	ACATCACTCTAGGGGTAGATGTA	5	+	494	1926
ENSDARG00000009890	ENSDART00000009012	19	1	1	AACCCACCATGGAAGGAGTATGT	5	+	1115	1926
ENSDARG00000009890	ENSDART00000009012	19	1	1	AAACGCAGCCGAAGAATTAGGATTT	7	+	714	1926
ENSDARG00000009890	ENSDART00000009012	19	1	1	AAAATCGACTTAGGTTGTCTAGGGG	7	+	392	1926
ENSDARG00000009905	ENSDART00000007356	19	2	2	GTAGACGCAGCTCGGGCTTTGGGG	6	-	337	1272
ENSDARG00000009905	ENSDART00000007356	19	2	2	GTAGACGCAGCTCGGGCTTTGGG	5	-	338	1272
ENSDARG00000009905	ENSDART00000007356	19	2	2	AGACGCAGCTCGGGCTTTGGGGTT	6	-	335	1272
ENSDARG00000009905	ENSDART00000007356	19	2	2	TCCTCCTCCGTTGAGTTTATTGGAG	7	-	432	1272
ENSDARG00000009905	ENSDART00000007356	19	7	7	TTCCCATCCCGCTGGAGTTGGGG	5	-	960	1272
ENSDARG00000009905	ENSDART00000007356	19	7	7	GTTCCCATCCCGCTGGAGTTGGGG	6	-	960	1272
ENSDARG00000009905	ENSDART00000007356	19	7	7	GTTCCCATCCCGCTGGAGTTGGG	5	-	961	1272
ENSDARG00000010266	ENSDART00000010140	19	1	1	TACAACAAAATGAATAAGCTGTA	5	+	1	1746
ENSDARG00000010266	ENSDART00000010140	19	3	3	CACCTCACATGCAGTGGGAAGTA	5	+	275	1746
ENSDARG00000010266	ENSDART00000010140	19	6	6	TGCCCCTGCTGTGGGTGGCAGGA	5	+	495	1746
ENSDARG00000010266	ENSDART00000010140	19	6	6	TACCCACCCAGTTTGTAGGAGCT	5	+	611	1746
ENSDARG00000010266	ENSDART00000010140	19	6	6	CGCCAAGGCTCTCCCAGTCTGGGCG	7	+	544	1746
ENSDARG00000010266	ENSDART00000010140	19	6	6	GTACCCACCCAGTTTGTAGGAGCT	6	+	610	1746
ENSDARG00000010266	ENSDART00000010140	19	7	7	CACTCAACACCAGAGGGCTGCAGTT	7	+	745	1746
ENSDARG00000010266	ENSDART00000010140	19	7	7	CTCAACACCAGAGGGCTGCAGTT	5	+	747	1746
ENSDARG00000010266	ENSDART00000010140	19	10	10	GGCTCAATCTGAATGCATTGGGT	5	+	1106	1746
ENSDARG00000010266	ENSDART00000010140	19	11	11	ACAGGCGCAGATGGAGTCGGAAAC	6	+	1215	1746
ENSDARG00000010266	ENSDART00000010140	19	13	13	TTCTCAGGCTCAGGGACGTATCT	5	+	1407	1746
ENSDARG00000010266	ENSDART00000010140	19	15	15	AGCCCAAGCCCTCAGCTGCAGGT	5	+	1712	1746
ENSDARG00000010290	ENSDART00000041578	19	3	2	GACACCAGCGGCCTGCGGGAGAG	5	+	151	801
ENSDARG00000010290	ENSDART00000041578	19	7	6	GACCACCACTCAGACAGAAGACGTG	7	+	477	801
ENSDARG00000010382	ENSDART00000026372	19	2	2	ACACTCGCAGGATCGTGCAGGAGTT	7	+	134	1806
ENSDARG00000010382	ENSDART00000026372	19	2	2	AAAGCCTGCAGAGAGAGCTGATTAA	7	+	182	1806
ENSDARG00000010382	ENSDART00000026372	19	3	3	AAATCCAGCCATTTCTTTGCCGAA	6	+	294	1806
ENSDARG00000010382	ENSDART00000026372	19	4	4	CTCAACTTCAAAGCTGAAGTGGAC	6	+	379	1806
ENSDARG00000010382	ENSDART00000026372	19	4	4	CGCATCAAAGTTAATAGCTGGTGTG	7	+	354	1806
ENSDARG00000010382	ENSDART00000026372	19	6	6	CTCTCAGTCTTGGAAGACTGATAA	6	+	651	1806
ENSDARG00000010382	ENSDART00000026372	19	7	7	GACTCACCAGTTATGAGGATTTC	5	+	805	1806
ENSDARG00000010382	ENSDART00000026372	19	8	8	GGCAGCACAGATTTTGCATGGGGG	6	+	852	1806
ENSDARG00000010382	ENSDART00000026372	19	11	11	CCCAAACTCTTTCGTGCAGTTGGC	6	+	1224	1806
ENSDARG00000010382	ENSDART00000026372	19	12	12	CTCTCCAACCAATCAGATGCTGAG	6	+	1347	1806
ENSDARG00000010382	ENSDART00000026372	19	12	12	CTCCAACCAATCAGATGCTGAGCT	6	+	1349	1806
ENSDARG00000010382	ENSDART00000026372	19	13	13	CTCCTCACAGAGCAGGTGAGTAA	5	+	1453	1806
ENSDARG00000010382	ENSDART00000026372	19	13	13	AGCCTCCTCACAGAGCAGGTGAG	5	+	1450	1806
ENSDARG00000010382	ENSDART00000026372	19	13	13	TACAGCTGCTCAGAGAGGCTGTC	5	+	1418	1806
ENSDARG00000010382	ENSDART00000026372	19	15	15	CACAAATACAGACAGTGTGATGT	5	+	1611	1806
ENSDARG00000010382	ENSDART00000026372	19	15	15	CACAAATACAGACAGTGTGATGTG	6	+	1611	1806
ENSDARG00000010382	ENSDART00000026372	19	15	15	AAATACAGACAGTGTGATGTGTTT	6	+	1614	1806
ENSDARG00000010728	ENSDART00000046609	19	1	1	TGCTTCACCACAAAGAGTTTGAG	5	+	35	2220
ENSDARG00000010728	ENSDART00000046609	19	1	1	TGCTTCACCACAAAGAGTTTGAGAA	7	+	35	2220
ENSDARG00000010728	ENSDART00000046609	19	2	2	ACCAGCTACTTCAAAGGCGGGATAA	7	+	346	2220
ENSDARG00000010728	ENSDART00000046609	19	4	4	GTAATCTACCAATGGTGTGGGTC	5	+	541	2220
ENSDARG00000010728	ENSDART00000046609	19	4	4	GTAATCTACCAATGGTGTGGGTCT	6	+	541	2220
ENSDARG00000010728	ENSDART00000046609	19	8	8	AGAAACACCCATCTTTAAGCAGTT	6	+	1029	2220
ENSDARG00000010728	ENSDART00000046609	19	8	8	CAATACAACATGGTTGATGACGGC	6	+	1183	2220
ENSDARG00000010728	ENSDART00000046609	19	10	10	GAACTAGACCGTTCACTGGGGGGAA	7	+	1414	2220
ENSDARG00000010728	ENSDART00000046609	19	11	11	AGACAAGCCTTTGATTGTGTATAA	6	+	1500	2220
ENSDARG00000010728	ENSDART00000046609	19	11	11	CTCTTCAAAGACAAGCCTTTGAT	5	+	1492	2220
ENSDARG00000010728	ENSDART00000046609	19	11	11	TTCAAAGACAAGCCTTTGATTGT	5	+	1495	2220
ENSDARG00000010728	ENSDART00000046609	19	12	12	TGCAAAACCAAAATGGTTGTTGAA	6	+	1762	2220
ENSDARG00000010728	ENSDART00000046609	19	12	12	AAAACCAAAATGGTTGTTGAAGGA	6	+	1765	2220
ENSDARG00000010728	ENSDART00000046609	19	16	16	GCCCCCCACCTTCACCGGCTGGTTC	7	+	2136	2220
ENSDARG00000010728	ENSDART00000046609	19	16	16	CCCCCCACCTTCACCGGCTGGTTC	6	+	2137	2220
ENSDARG00000011076	ENSDART00000017535	19	1	1	TGCTGCTGCTGTGAGGATGAAGAT	6	+	52	702
ENSDARG00000011076	ENSDART00000017535	19	1	1	TGCTGCTGCTGCTGCTGTGAGGAT	6	+	46	702
ENSDARG00000011076	ENSDART00000017535	19	1	1	ATCAAATTCTGCTGCTGCTGCTGCT	7	+	37	702
ENSDARG00000011076	ENSDART00000017535	19	1	1	AGAAAAGGCGCCTTTAATTGGGT	5	+	81	702
ENSDARG00000011076	ENSDART00000017535	19	1	1	TGCTGCTGCTGCTGTGAGGATGAA	6	+	49	702
ENSDARG00000011076	ENSDART00000017535	19	1	1	AAATTCTGCTGCTGCTGCTGCTGTG	7	+	40	702
ENSDARG00000011076	ENSDART00000017535	19	1	1	TGCATCAAATTCTGCTGCTGCTGCT	7	+	34	702
ENSDARG00000011076	ENSDART00000017535	19	5	5	CTACCCTCCCAAAGACGATGACGAA	7	+	576	702
ENSDARG00000011076	ENSDART00000017535	19	5	5	TCCCAAAGACGATGACGAAGAAGAA	7	+	582	702
ENSDARG00000011076	ENSDART00000017535	19	5	5	CCCAAAGACGATGACGAAGAAGAA	6	+	583	702
ENSDARG00000011076	ENSDART00000017535	19	5	5	ACCCTCCCAAAGACGATGACGAA	5	+	578	702
ENSDARG00000011076	ENSDART00000017535	19	5	5	AACATCTCCGGAGGAGAAGATGAG	6	+	661	702
ENSDARG00000011146	ENSDART00000005191	19	2	2	GCATCCGGCAGGTTCGTGGATGTC	6	+	34	333
ENSDARG00000011146	ENSDART00000005191	19	3	3	TCCTTCCCAAAGACCAGTGGACGAA	7	+	233	333
ENSDARG00000011171	ENSDART00000040740	19	3	3	ACACTCTTCCACCGAGTCTGAGAC	6	-	391	6939
ENSDARG00000011171	ENSDART00000040740	19	3	3	GCACTCTCCATTGCCGTGGCAGTT	6	-	421	6939
ENSDARG00000011171	ENSDART00000040740	19	4	4	ACCCGCTTCACAGGTGCAGCTGCC	6	-	646	6939
ENSDARG00000011171	ENSDART00000040740	19	13	13	ACCAGCTGCCCAAGTTTGAGGGG	5	-	2175	6939
ENSDARG00000011171	ENSDART00000040740	19	13	13	AGCTGCCCAAGTTTGAGGGGTTGAG	7	-	2170	6939
ENSDARG00000011171	ENSDART00000040740	19	13	13	AGCTGCCCAAGTTTGAGGGGTTG	5	-	2172	6939
ENSDARG00000011171	ENSDART00000040740	19	14	14	TACCCATAATGCTGTTGATGATGGG	7	-	2287	6939
ENSDARG00000011171	ENSDART00000040740	19	14	14	ACAGCCATCGGTGCCAGCAGCTTGT	7	-	2366	6939
ENSDARG00000011171	ENSDART00000040740	19	14	14	TCCCACTGCAGCTTGGGCATGAGAT	7	-	2329	6939
ENSDARG00000011171	ENSDART00000040740	19	14	14	CACCGCTGCCCTTATGAAGGATTC	6	-	2234	6939
ENSDARG00000011171	ENSDART00000040740	19	14	14	GCCATCCCACTGCAGCTTGGGCA	5	-	2335	6939
ENSDARG00000011171	ENSDART00000040740	19	14	14	GTCACCCACATACAGGTTGCCGTC	6	-	2404	6939
ENSDARG00000011171	ENSDART00000040740	19	17	17	CTCTCCGCACCCGAAGTGTGTTGTT	7	-	3538	6939
ENSDARG00000011171	ENSDART00000040740	19	17	17	TGCCACCTCCTGGCTGAGGGCGGA	6	-	3652	6939
ENSDARG00000011171	ENSDART00000040740	19	17	17	AGAGGCATCGGTAACAGCCGCCAAC	7	-	3513	6939
ENSDARG00000011171	ENSDART00000040740	19	17	17	GTTGACATCATTCTTGCAGTCGCA	6	-	3199	6939
ENSDARG00000011171	ENSDART00000040740	19	17	17	ACATCATTCTTGCAGTCGCATTC	5	-	3196	6939
ENSDARG00000011171	ENSDART00000040740	19	17	17	CTCCGCACCCGAAGTGTGTTGTT	5	-	3538	6939
ENSDARG00000011171	ENSDART00000040740	19	17	17	TTCATCTCCTGAAAAGCAGTTGCA	6	-	3223	6939
ENSDARG00000011171	ENSDART00000040740	19	18	18	GACTCCTCCATCTCACGGCGCAGGC	7	-	3806	6939
ENSDARG00000011171	ENSDART00000040740	19	18	18	GACATCATCATCTCGGTTTGAGCT	6	-	3850	6939
ENSDARG00000011171	ENSDART00000040740	19	19	19	TGCGCCTCCCGATGGTTGGGCTTAC	7	-	4036	6939
ENSDARG00000011171	ENSDART00000040740	19	19	19	TGCCCATCCCATTAGCATAGGAC	5	-	3975	6939
ENSDARG00000011171	ENSDART00000040740	19	20	20	CTAGTCGACCAGTGGGTGAGTAA	5	-	4323	6939
ENSDARG00000011171	ENSDART00000040740	19	21	21	TCCAACCTCCTGCTGTGCGGCTGTA	7	-	5512	6939
ENSDARG00000011171	ENSDART00000040740	19	21	21	TCCAACCTCCTGCTGTGCGGCTGT	6	-	5513	6939
ENSDARG00000011171	ENSDART00000040740	19	21	21	GTCATCACCGCTGTGGTGATGAT	5	-	5068	6939
ENSDARG00000011171	ENSDART00000040740	19	21	21	GTACCCGACAGACACATGGGTGGCC	7	-	4566	6939
ENSDARG00000011171	ENSDART00000040740	19	21	21	ACCTCCTGCTGTGCGGCTGTAGGC	6	-	5509	6939
ENSDARG00000011171	ENSDART00000040740	19	21	21	ATCAAAGACGTACTGCTTTTGAC	5	-	4484	6939
ENSDARG00000011171	ENSDART00000040740	19	21	21	AGCGTCATCACCGCTGTGGTGAT	5	-	5071	6939
ENSDARG00000011171	ENSDART00000040740	19	21	21	CGCTCAAGAAGACCCTTAGAGTTG	6	-	5484	6939
ENSDARG00000011171	ENSDART00000040740	19	21	21	CTAGCCACCCTGAAGCTGTTGTC	5	-	4927	6939
ENSDARG00000011171	ENSDART00000040740	19	21	21	CTCGCCTTCACTTGTTCTGCGGGA	6	-	5575	6939
ENSDARG00000011171	ENSDART00000040740	19	21	21	CACTCCAACCTCCTGCTGTGCGGCT	7	-	5515	6939
ENSDARG00000011171	ENSDART00000040740	19	23	23	AGCCCAAGCTTCACGAAGAAGTG	5	-	6502	6939
ENSDARG00000011299	ENSDART00000044274	19	2	2	TCCTGCAGCGGCTCTGCTGGAGGT	6	-	354	1182
ENSDARG00000011299	ENSDART00000044274	19	2	2	TCCGTCAGCTGCTCAGGGGCTGGC	6	-	96	1182
ENSDARG00000011299	ENSDART00000044274	19	2	2	TACTCCTGCAGCGGCTCTGCTGGA	6	-	357	1182
ENSDARG00000011299	ENSDART00000044274	19	2	2	TGCAGCGGCTCTGCTGGAGGTGGA	6	-	351	1182
ENSDARG00000011299	ENSDART00000044274	19	2	2	TGCAGCGGCTCTGCTGGAGGTGGAG	7	-	350	1182
ENSDARG00000011299	ENSDART00000044274	19	3	3	CGCTCCAGCTGCTCCGCCGTGTGC	6	-	600	1182
ENSDARG00000011299	ENSDART00000044274	19	5	5	GCCATCTTCTCGGCCGGTGTGTTG	6	-	987	1182
ENSDARG00000011299	ENSDART00000044274	19	5	5	TCCGCCATCTTCTCGGCCGGTGTG	6	-	990	1182
ENSDARG00000011299	ENSDART00000044274	19	5	5	CACTGCAGAGACACCAGCAGCTGCT	7	-	809	1182
ENSDARG00000011299	ENSDART00000044274	19	5	5	TGCCCAGCAGGTGAGCGTTGATGGC	7	-	916	1182
ENSDARG00000011299	ENSDART00000044274	19	6	6	AGAAACGGCGAATCAGATGAAGAC	6	-	1068	1182
ENSDARG00000011299	ENSDART00000044274	19	6	6	GGCCAATGCTCTTCCTGTTGGGCA	6	-	1091	1182
ENSDARG00000011312	ENSDART00000008698	19	2	2	TTACCAAGCAGCCAGAGGAAGTA	5	+	62	1476
ENSDARG00000011312	ENSDART00000008698	19	2	2	TACCAAGCAGCCAGAGGAAGTATTT	7	+	63	1476
ENSDARG00000011312	ENSDART00000008698	19	2	2	GCAGCCAGAGGAAGTATTTGATGTT	7	+	69	1476
ENSDARG00000011312	ENSDART00000008698	19	4	4	TTCAAAAACACAGATCTGTGGATTG	7	+	274	1476
ENSDARG00000011312	ENSDART00000008698	19	4	4	TTCAAAAACACAGATCTGTGGAT	5	+	274	1476
ENSDARG00000011312	ENSDART00000008698	19	4	4	GACTGCGCAACAAAACGGTGAATAA	7	+	341	1476
ENSDARG00000011312	ENSDART00000008698	19	4	4	CAAAAACACAGATCTGTGGATTGT	6	+	276	1476
ENSDARG00000011312	ENSDART00000008698	19	4	4	CAAAAACACAGATCTGTGGATTG	5	+	276	1476
ENSDARG00000011312	ENSDART00000008698	19	4	4	AAAAACACAGATCTGTGGATTGT	5	+	277	1476
ENSDARG00000011312	ENSDART00000008698	19	4	4	AACAGCCCATATGTGGTGAAGTA	5	+	238	1476
ENSDARG00000011312	ENSDART00000008698	19	6	6	ACATACATCCAATGAGAGTGAGTG	6	+	674	1476
ENSDARG00000011312	ENSDART00000008698	19	7	7	GACGGCAACTCAACTGCTGCAGGT	6	+	807	1476
ENSDARG00000011312	ENSDART00000008698	19	8	8	AGCAGCAGAGAGAGCTGGAGGAGGA	7	+	917	1476
ENSDARG00000011312	ENSDART00000008698	19	9	9	GTTATCAACAGCGATGATGAGGAA	6	+	1105	1476
ENSDARG00000011312	ENSDART00000008698	19	9	9	GGCAGCACCATGCTGGAGTCTAA	5	+	1069	1476
ENSDARG00000011312	ENSDART00000008698	19	9	9	ATCAACAGCGATGATGAGGAAGAA	6	+	1108	1476
ENSDARG00000011334	ENSDART00000016128	19	2	1	TGCGTCTCCATAGGGGAAGAAGTT	6	-	169	576
ENSDARG00000011334	ENSDART00000016128	19	2	1	CCCATCTCCATTGGCGTCGAAGGT	6	-	220	576
ENSDARG00000011334	ENSDART00000016128	19	2	1	AGCATCTCCGCCTTGCTGATGTA	5	-	352	576
ENSDARG00000011334	ENSDART00000016128	19	4	3	GCAAAAGTCGCACGATGGATGGGTC	7	-	535	576
ENSDARG00000011334	ENSDART00000016128	19	4	3	AAAGTCGCACGATGGATGGGTCGTT	7	-	532	576
ENSDARG00000011506	ENSDART00000009431	19	1	1	TTCGTCTGCTCTTTGCTGCATTC	5	+	35	1335
ENSDARG00000011506	ENSDART00000009431	19	2	2	ACCTCACTCTTCCTACTTTGATGCC	7	+	264	1335
ENSDARG00000011506	ENSDART00000009431	19	8	8	CACTCCGTCAGAAGAGGAGAAGAA	6	+	696	1335
ENSDARG00000011506	ENSDART00000009431	19	9	9	GCCAAAGGCCCTTTGCGTTTGCC	5	+	820	1335
ENSDARG00000011506	ENSDART00000009431	19	9	9	GAATTCGCCAGACTGGTGCGACTTT	7	+	862	1335
ENSDARG00000011506	ENSDART00000009431	19	10	10	CACCAACCCATGACAGAAGCAGTC	6	+	994	1335
ENSDARG00000011506	ENSDART00000009431	19	10	10	CCCGTCAGCTGTGTGGAAGACGAC	6	+	941	1335
ENSDARG00000011506	ENSDART00000009431	19	10	10	GAAGACAAAAGTCACAGATGAAGTC	7	+	894	1335
ENSDARG00000011506	ENSDART00000009431	19	10	10	ACCAACCCATGACAGAAGCAGTC	5	+	995	1335
ENSDARG00000011506	ENSDART00000009431	19	10	10	ACAAAAGTCACAGATGAAGTCTTG	6	+	898	1335
ENSDARG00000011506	ENSDART00000009431	19	11	11	GTTTCCAGCATGGGATGATGGATGT	7	+	1037	1335
ENSDARG00000011506	ENSDART00000009431	19	12	12	AAAAACTGCTCTGGGAGTTGGAG	5	+	1194	1335
ENSDARG00000011506	ENSDART00000103855	19	1	1	ACACACGGCGGTGAACGGAGGAGAC	7	+	33	1551
ENSDARG00000011506	ENSDART00000103855	19	1	1	GAAAACTACACACGGCGGTGAAC	5	+	26	1551
ENSDARG00000011506	ENSDART00000103855	19	2	2	TTCGTCTGCTCTTTGCTGCATTC	5	+	161	1551
ENSDARG00000011506	ENSDART00000103855	19	3	3	ACCTCACTCTTCCTACTTTGATGCC	7	+	390	1551
ENSDARG00000011506	ENSDART00000103855	19	9	9	CACTCCGTCAGAAGAGGAGAAGAA	6	+	822	1551
ENSDARG00000011506	ENSDART00000103855	19	10	10	GCCAAAGGCCCTTTGCGTTTGCC	5	+	946	1551
ENSDARG00000011506	ENSDART00000103855	19	10	10	GAATTCGCCAGACTGGTGCGACTTT	7	+	988	1551
ENSDARG00000011506	ENSDART00000103855	19	11	11	GAAGACAAAAGTCACAGATGAAGTC	7	+	1020	1551
ENSDARG00000011506	ENSDART00000103855	19	11	11	CCCGTCAGCTGTGTGGAAGACGAC	6	+	1067	1551
ENSDARG00000011506	ENSDART00000103855	19	11	11	CACCAACCCATGACAGAAGCAGTC	6	+	1120	1551
ENSDARG00000011506	ENSDART00000103855	19	11	11	ACCAACCCATGACAGAAGCAGTC	5	+	1121	1551
ENSDARG00000011506	ENSDART00000103855	19	11	11	ACAAAAGTCACAGATGAAGTCTTG	6	+	1024	1551
ENSDARG00000011506	ENSDART00000103855	19	12	12	GTTTCCAGCATGGGATGATGGATGT	7	+	1163	1551
ENSDARG00000011506	ENSDART00000103855	19	13	13	AAAAACTGCTCTGGGAGTTGGAG	5	+	1320	1551
ENSDARG00000011564	ENSDART00000017359	19	1	1	CTACCCAAACCCGCGATGGGGAA	5	+	508	1914
ENSDARG00000011564	ENSDART00000017359	19	1	1	GCCCACAAATGGGTGGTGGATTT	5	+	191	1914
ENSDARG00000011564	ENSDART00000017359	19	1	1	ACCTACCCAAACCCGCGATGGGGAA	7	+	506	1914
ENSDARG00000011564	ENSDART00000017359	19	1	1	TCCAGCCCCGAGGCCGCGGAGGAA	6	+	44	1914
ENSDARG00000011564	ENSDART00000017359	19	1	1	ATCTACACAACAGAAGCCGCAGGA	6	+	246	1914
ENSDARG00000011564	ENSDART00000017359	19	2	2	ACATACACCCAACGTTGTCGTCTTT	7	+	709	1914
ENSDARG00000011564	ENSDART00000017359	19	2	2	TGCTGCGCAAGCCTGGGGAGAAAAC	7	+	686	1914
ENSDARG00000011564	ENSDART00000017359	19	2	2	GAAGGCAACGCTCTCTTTGCTGCG	6	+	669	1914
ENSDARG00000011564	ENSDART00000017359	19	3	3	CGCTCAACAGGGAAAGGCATTGTTG	7	+	1060	1914
ENSDARG00000011564	ENSDART00000017359	19	4	4	CCCCCCGTCCAATTGTGGTTGAA	5	+	1157	1914
ENSDARG00000011564	ENSDART00000017359	19	6	6	AGCTGCACAGTCAGGAGATGCAGAA	7	+	1487	1914
ENSDARG00000011564	ENSDART00000017359	19	6	6	AACTTCGCCGCATGGAGGAGCTGCA	7	+	1469	1914
ENSDARG00000011637	ENSDART00000015932	19	4	4	CTCGCCCCCGGGCCTCTGTTTTC	5	-	581	1872
ENSDARG00000011637	ENSDART00000015932	19	4	4	TTCCTCCTCCATAAGAGGAGGCT	5	-	344	1872
ENSDARG00000011637	ENSDART00000015932	19	5	5	GTTTACTGCTGGTCCCGTTGGCTTT	7	-	910	1872
ENSDARG00000011637	ENSDART00000015932	19	11	11	TCCTGCAGCACTGCTGGGAGCAGAG	7	-	1767	1872
ENSDARG00000011740	ENSDART00000023571	19	2	2	TACCCACCATGACCGTTTAGACTGT	7	-	62	1425
ENSDARG00000011740	ENSDART00000023571	19	3	3	GGCACCTGCGTCTGTGTCGGCGTT	6	-	194	1425
ENSDARG00000011740	ENSDART00000023571	19	3	3	GACTGCGTCGCCGGTGCCGGTTCT	6	-	92	1425
ENSDARG00000011740	ENSDART00000023571	19	6	6	GCCTACTACAGGCACCGGGGTCGGC	7	-	417	1425
ENSDARG00000011740	ENSDART00000023571	19	10	10	TTAACCAGATTGAAGGCTTTGAG	5	-	871	1425
ENSDARG00000011740	ENSDART00000023571	19	11	11	ACCAGCAGCTTCTTATCTGCCAAC	6	-	990	1425
ENSDARG00000011740	ENSDART00000023571	19	12	12	GCCATCGACGGGTCTGGGAATTT	5	-	1256	1425
ENSDARG00000011740	ENSDART00000023571	19	13	13	GTCACCACCACCCTGTTGGCGAA	5	-	1369	1425
ENSDARG00000011740	ENSDART00000104560	19	2	2	GACTGCGTCGCCGGTGCCGGTTCT	6	-	77	1374
ENSDARG00000011740	ENSDART00000104560	19	2	2	GGCACCTGCGTCTGTGTCGGCGTT	6	-	179	1374
ENSDARG00000011740	ENSDART00000104560	19	4	4	GCCTACTACAGGCACCGGGGTCGGC	7	-	366	1374
ENSDARG00000011740	ENSDART00000104560	19	8	8	TTAACCAGATTGAAGGCTTTGAG	5	-	820	1374
ENSDARG00000011740	ENSDART00000104560	19	9	9	ACCAGCAGCTTCTTATCTGCCAAC	6	-	939	1374
ENSDARG00000011740	ENSDART00000104560	19	10	10	GCCATCGACGGGTCTGGGAATTT	5	-	1205	1374
ENSDARG00000011740	ENSDART00000104560	19	11	11	GTCACCACCACCCTGTTGGCGAA	5	-	1318	1374
ENSDARG00000011796	ENSDART00000007642	19	4	4	ACATCAGGCAGTGCTATCTGAGGAA	7	-	341	1638
ENSDARG00000011796	ENSDART00000007642	19	5	5	CCCATCATCTCATAGTGGTGCGGCA	7	-	506	1638
ENSDARG00000011796	ENSDART00000007642	19	5	5	ACCCACAGACGGTATGTGTTTTTC	6	-	450	1638
ENSDARG00000011796	ENSDART00000007642	19	5	5	ACCCACAGACGGTATGTGTTTTT	5	-	451	1638
ENSDARG00000011796	ENSDART00000007642	19	6	6	TTCTACAAAATCTTGAATGGGAT	5	-	683	1638
ENSDARG00000011796	ENSDART00000007642	19	6	6	GGCCAAACATTCGGTGGGCGTGGCT	7	-	718	1638
ENSDARG00000011796	ENSDART00000007642	19	6	6	TACAAAATCTTGAATGGGATTGGCT	7	-	678	1638
ENSDARG00000011796	ENSDART00000007642	19	9	9	GCAGTCCACCAGCATCTGCTGGG	5	-	1133	1638
ENSDARG00000011796	ENSDART00000007642	19	9	9	GCAGTCCACCAGCATCTGCTGGGAC	7	-	1131	1638
ENSDARG00000011796	ENSDART00000007642	19	10	10	GTAGACTCCATTGCTGTAGAAGGC	6	-	1423	1638
ENSDARG00000011796	ENSDART00000007642	19	11	11	GTAGCCACACCGCAGTTGTTGTC	5	-	1600	1638
ENSDARG00000011796	ENSDART00000007642	19	11	11	AGCCACACCGCAGTTGTTGTCTTT	6	-	1597	1638
ENSDARG00000011796	ENSDART00000051733	19	1	1	GAAAAATCCACATTGTGTAGTCTAC	7	-	58	999
ENSDARG00000011796	ENSDART00000051733	19	1	1	GAAAAATCCACATTGTGTAGTCT	5	-	60	999
ENSDARG00000011796	ENSDART00000051733	19	1	1	AGAAAAATCCACATTGTGTAGTCT	6	-	60	999
ENSDARG00000011796	ENSDART00000051733	19	1	1	AGAAAAATCCACATTGTGTAGTC	5	-	61	999
ENSDARG00000011796	ENSDART00000051733	19	1	1	AAAATCCACATTGTGTAGTCTAC	5	-	58	999
ENSDARG00000011796	ENSDART00000051733	19	3	3	AAACACTTAATAACACTGGGAGGAA	7	-	338	999
ENSDARG00000011796	ENSDART00000051733	19	4	4	CCCTCCATCTCAAAGCGGTGTGGTG	7	-	560	999
ENSDARG00000011796	ENSDART00000051733	19	5	5	GGCCAAACATCCGGTGGGCGTGGCT	7	-	772	999
ENSDARG00000011796	ENSDART00000051733	19	6	6	TGCATCCTCCTCCTTTTTTGGAA	5	-	983	999
ENSDARG00000011796	ENSDART00000051733	19	6	6	TCCTCCTCCTTTTTTGGAAGTAAAC	7	-	977	999
ENSDARG00000011796	ENSDART00000051733	19	6	6	GGCCAACTCTTCCTTTGTCTTGTCT	7	-	939	999
ENSDARG00000011796	ENSDART00000056990	19	1	1	AAAATCCACATTGTGTAGTCTAC	5	-	58	999
ENSDARG00000011796	ENSDART00000056990	19	1	1	AGAAAAATCCACATTGTGTAGTC	5	-	61	999
ENSDARG00000011796	ENSDART00000056990	19	1	1	AGAAAAATCCACATTGTGTAGTCT	6	-	60	999
ENSDARG00000011796	ENSDART00000056990	19	1	1	GAAAAATCCACATTGTGTAGTCTAC	7	-	58	999
ENSDARG00000011796	ENSDART00000056990	19	1	1	GAAAAATCCACATTGTGTAGTCT	5	-	60	999
ENSDARG00000011796	ENSDART00000056990	19	3	3	AAACACTTAATAACACTGGGAGGAA	7	-	338	999
ENSDARG00000011796	ENSDART00000056990	19	4	4	CCCTCCATCTCAAAGCGGTGTGGTG	7	-	560	999
ENSDARG00000011796	ENSDART00000056990	19	5	5	GGCCAAACATCCGGTGGGCGTGGCT	7	-	772	999
ENSDARG00000011796	ENSDART00000056990	19	6	6	TGCATCCTCCTCCTTTTTTGGAA	5	-	983	999
ENSDARG00000011796	ENSDART00000056990	19	6	6	TCCTCCTCCTTTTTTGGAAGTAAAC	7	-	977	999
ENSDARG00000011796	ENSDART00000056990	19	6	6	GGCCAACTCTTCCTTTGTCTTGTCT	7	-	939	999
ENSDARG00000011796	ENSDART00000076819	19	1	1	ATCCCCACAGTGAATTTGTATTC	5	-	12	450
ENSDARG00000011796	ENSDART00000076819	19	2	2	GCAGTCCACCAGCATCTGCTGGG	5	-	74	450
ENSDARG00000011796	ENSDART00000076819	19	2	2	GCAGTCCACCAGCATCTGCTGGGAC	7	-	72	450
ENSDARG00000011796	ENSDART00000076819	19	3	3	GTAGACTCCATTGCTGTAGAAGGC	6	-	364	450
ENSDARG00000011796	ENSDART00000082897	19	2	2	AAACACTTAATAACACTGGGAGGAA	7	-	242	1593
ENSDARG00000011796	ENSDART00000082897	19	3	3	CCCTCCATCTCAAAGCGGTGTGGTG	7	-	464	1593
ENSDARG00000011796	ENSDART00000082897	19	4	4	GGCCAAACATCCGGTGGGCGTGGCT	7	-	676	1593
ENSDARG00000011796	ENSDART00000082897	19	5	5	TGCATCCTCCTCCTTTTTTGGAA	5	-	887	1593
ENSDARG00000011796	ENSDART00000082897	19	5	5	TCCTCCTCCTTTTTTGGAAGTAAAC	7	-	881	1593
ENSDARG00000011796	ENSDART00000082897	19	5	5	GGCCAACTCTTCCTTTGTCTTGTCT	7	-	843	1593
ENSDARG00000011796	ENSDART00000082897	19	8	8	GCAGTCCACCAGCATCTGCTGGGAC	7	-	1086	1593
ENSDARG00000011796	ENSDART00000082897	19	8	8	GCAGTCCACCAGCATCTGCTGGG	5	-	1088	1593
ENSDARG00000011796	ENSDART00000082897	19	9	9	GTAGACTCCATTGCTGTAGAAGGC	6	-	1378	1593
ENSDARG00000011796	ENSDART00000082897	19	10	10	GTAGCCACACCGCAGTTGTTGTC	5	-	1555	1593
ENSDARG00000011796	ENSDART00000082897	19	10	10	AGCCACACCGCAGTTGTTGTCTTT	6	-	1552	1593
ENSDARG00000011797	ENSDART00000022076	19	1	1	AGAACCGGCGCTGTTGTGTTTTGTC	7	+	41	1185
ENSDARG00000011797	ENSDART00000022076	19	1	1	AGAACCGGCGCTGTTGTGTTTTGT	6	+	41	1185
ENSDARG00000011797	ENSDART00000022076	19	1	1	AGAACCGGCGCTGTTGTGTTTTG	5	+	41	1185
ENSDARG00000011797	ENSDART00000022076	19	1	1	GTCCACCGCGGATGTGTCGGAGCA	6	+	18	1185
ENSDARG00000011797	ENSDART00000022076	19	1	1	ACACTCTCCGTTCAGCCGCGGCA	5	+	139	1185
ENSDARG00000011797	ENSDART00000022076	19	2	2	CTCTCCATCGCGTGGTAGATGAA	5	+	938	1185
ENSDARG00000011797	ENSDART00000022076	19	2	2	CTATCAGACATGGATGGCTTGTAG	6	+	1170	1185
ENSDARG00000011797	ENSDART00000022076	19	2	2	CCCTTCGACGGCAGTTTGAGTTC	5	+	527	1185
ENSDARG00000011797	ENSDART00000022076	19	2	2	AGCAGCAGAGGAAGCTGGAGGCGTA	7	+	860	1185
ENSDARG00000011797	ENSDART00000022076	19	2	2	ACCTGCAGAACCACTTTAATGGGAT	7	+	884	1185
ENSDARG00000011870	ENSDART00000012791	19	1	1	CTCACCCCAAGAAGTGAAGTTGCC	6	-	12	1218
ENSDARG00000011870	ENSDART00000012791	19	2	2	GCCCACTGCTTAGGAGATGTGGAG	6	-	599	1218
ENSDARG00000011870	ENSDART00000012791	19	2	2	GTTGGCACCAGTGCTGCTGTCTGT	6	-	667	1218
ENSDARG00000011870	ENSDART00000012791	19	2	2	GTTTCCAAACGGGCTGGTGGAGGT	6	-	250	1218
ENSDARG00000011870	ENSDART00000012791	19	2	2	GTTTCCAAACGGGCTGGTGGAGGTG	7	-	249	1218
ENSDARG00000011870	ENSDART00000012791	19	2	2	TCCCGCAGCCCGGGATGTGGCAGCT	7	-	850	1218
ENSDARG00000011870	ENSDART00000012791	19	2	2	TGCTGCCCACTGCTTAGGAGATGTG	7	-	602	1218
ENSDARG00000011870	ENSDART00000012791	19	2	2	GCCAGCGCAAATGCGCTTTGAGGTG	7	-	895	1218
ENSDARG00000011870	ENSDART00000012791	19	2	2	GAACCCGTCCATCAGGTGCTGCC	5	-	620	1218
ENSDARG00000011870	ENSDART00000012791	19	2	2	ACATCAATCCAACCTGTGCCAAC	5	-	469	1218
ENSDARG00000011870	ENSDART00000012791	19	2	2	AGCAGCTGCTGGGCGCTGCGCGTTT	7	-	151	1218
ENSDARG00000011870	ENSDART00000012791	19	2	2	CACTGCTTAGGAGATGTGGAGAC	5	-	597	1218
ENSDARG00000011870	ENSDART00000012791	19	2	2	CCCTCCTAAAACCGCGCTGTTGGC	6	-	685	1218
ENSDARG00000011870	ENSDART00000012791	19	2	2	CGCGGCACCATTCGCGCTTTGAAC	6	-	490	1218
ENSDARG00000011870	ENSDART00000012791	19	2	2	CTCCCATCCCCGGAGGAGATGCC	5	-	427	1218
ENSDARG00000012040	ENSDART00000024193	19	1	1	CTCCACCTCTGAGCTGCTGGAGTG	6	+	291	1764
ENSDARG00000012040	ENSDART00000024193	19	1	1	GACTCCTAAGAAGCGGCGTATCT	5	+	75	1764
ENSDARG00000012040	ENSDART00000024193	19	1	1	GCACTAGCCGCCGGAGTAGATGGC	6	+	154	1764
ENSDARG00000012040	ENSDART00000024193	19	1	1	GCCACCACCGCTCGTGTGCCGAC	5	+	368	1764
ENSDARG00000012040	ENSDART00000024193	19	1	1	GGCTCCACCTCTGAGCTGCTGGA	5	+	289	1764
ENSDARG00000012040	ENSDART00000024193	19	1	1	TGCCACCACCGCTCGTGTGCCGAC	6	+	367	1764
ENSDARG00000012040	ENSDART00000024193	19	1	1	CACCACCGCTCGTGTGCCGACTGC	6	+	370	1764
ENSDARG00000012040	ENSDART00000024193	19	1	1	ATCAGCAGCAGCAGGGGTCGGAGAG	7	+	2	1764
ENSDARG00000012040	ENSDART00000024193	19	1	1	AGCAGCAGCAGGGGTCGGAGAGGGA	7	+	5	1764
ENSDARG00000012040	ENSDART00000024193	19	1	1	CGCTTCGGCTCTTTCTGCGGCCGGT	7	+	228	1764
ENSDARG00000012040	ENSDART00000024193	19	2	2	CAAATCAGACCTGTGACGCCGCT	5	+	698	1764
ENSDARG00000012040	ENSDART00000024193	19	2	2	GCATCCAAATCAGACCTGTGACGCC	7	+	693	1764
ENSDARG00000012040	ENSDART00000024193	19	2	2	ATCCAAATCAGACCTGTGACGCC	5	+	695	1764
ENSDARG00000012040	ENSDART00000024193	19	3	3	GTAATCACATGACCTGCGCAGTG	5	+	866	1764
ENSDARG00000012040	ENSDART00000024193	19	6	6	TGCCGCAGCGGTGGTTGCGGTGTGT	7	+	1282	1764
ENSDARG00000012040	ENSDART00000024193	19	6	6	TGCCGCAGCGGTGGTTGCGGTGTG	6	+	1282	1764
ENSDARG00000012040	ENSDART00000024193	19	7	7	AAAACCCCAGCATTGGTGAGGGC	5	+	1400	1764
ENSDARG00000012040	ENSDART00000024193	19	7	7	GCAAAACCCCAGCATTGGTGAGGGC	7	+	1398	1764
ENSDARG00000012040	ENSDART00000024193	19	7	7	GGCAAAACCCCAGCATTGGTGAGGG	7	+	1397	1764
ENSDARG00000012040	ENSDART00000024193	19	7	7	CAAAACCCCAGCATTGGTGAGGGC	6	+	1399	1764
ENSDARG00000012040	ENSDART00000024193	19	7	7	CAAAACCCCAGCATTGGTGAGGG	5	+	1399	1764
ENSDARG00000012040	ENSDART00000024193	19	7	7	GCAAAACCCCAGCATTGGTGAGGG	6	+	1398	1764
ENSDARG00000012044	ENSDART00000013666	19	3	2	TTCTTCACCTGTATGCAGAGGCA	5	-	149	663
ENSDARG00000012044	ENSDART00000013666	19	6	5	GACTCATACCTCTAGTTTTTGAA	5	-	449	663
ENSDARG00000012044	ENSDART00000013666	19	7	6	CTCTTCGTCATCATTCTGTTTCT	5	-	518	663
ENSDARG00000012060	ENSDART00000043133	19	1	1	AAACGCCTCCGAGTTTGGGTGGCA	6	-	122	2793
ENSDARG00000012060	ENSDART00000043133	19	1	1	AACGCCTCCGAGTTTGGGTGGCA	5	-	122	2793
ENSDARG00000012060	ENSDART00000043133	19	2	2	TCCCTCTGCGAGAGCAGGGTTTTGT	7	-	267	2793
ENSDARG00000012060	ENSDART00000043133	19	2	2	ATCCACAGATTCCGCCTCTGATGGA	7	-	411	2793
ENSDARG00000012060	ENSDART00000043133	19	7	7	ACATCATGCTCTCCATGCAGCTTAC	7	-	787	2793
ENSDARG00000012060	ENSDART00000043133	19	8	8	TTCCAAACCAACCCCTTTGAGTGT	6	-	979	2793
ENSDARG00000012060	ENSDART00000043133	19	8	8	TCCAAACCAACCCCTTTGAGTGT	5	-	979	2793
ENSDARG00000012060	ENSDART00000043133	19	8	8	AACCAACCCCTTTGAGTGTTGGAC	6	-	974	2793
ENSDARG00000012060	ENSDART00000043133	19	8	8	ACCAACCCCTTTGAGTGTTGGAC	5	-	974	2793
ENSDARG00000012060	ENSDART00000043133	19	8	8	AAACCAACCCCTTTGAGTGTTGGAC	7	-	974	2793
ENSDARG00000012060	ENSDART00000043133	19	10	10	TGCAAAACAGCCTACAGTCTGATTT	7	-	1140	2793
ENSDARG00000012060	ENSDART00000043133	19	10	10	TGCGTCCCATCACACAGTGTGAGTT	7	-	1207	2793
ENSDARG00000012060	ENSDART00000043133	19	10	10	CAAAACAGCCTACAGTCTGATTTC	6	-	1139	2793
ENSDARG00000012060	ENSDART00000043133	19	10	10	CAAAACAGCCTACAGTCTGATTT	5	-	1140	2793
ENSDARG00000012060	ENSDART00000043133	19	12	12	TCCTGCCCAGAGTTTGGAGTGTTT	6	-	1374	2793
ENSDARG00000012060	ENSDART00000043133	19	12	12	TCCTCCTGCCCAGAGTTTGGAGTG	6	-	1377	2793
ENSDARG00000012060	ENSDART00000043133	19	12	12	GTATCCTCCTGCCCAGAGTTTGGA	6	-	1380	2793
ENSDARG00000012060	ENSDART00000043133	19	13	13	GTATCAAGCTGATCGCCGTTGGG	5	-	1558	2793
ENSDARG00000012060	ENSDART00000043133	19	13	13	GCAAGCATCACCATAGGAGTCTGT	6	-	1516	2793
ENSDARG00000012060	ENSDART00000043133	19	14	14	ACCATCTCCATCTCGGTCTGTCTGC	7	-	1677	2793
ENSDARG00000012060	ENSDART00000043133	19	14	14	CTAACCTGCAGTGGGTCGTTGAC	5	-	1732	2793
ENSDARG00000012060	ENSDART00000043133	19	19	19	ATCAACACCATTAAATGCTGTGTAG	7	-	2226	2793
ENSDARG00000012060	ENSDART00000043133	19	19	19	GTAATCATCATCAGTGGCTGTGTTC	7	-	2271	2793
ENSDARG00000012060	ENSDART00000043133	19	19	19	CACATCACCACATAGAAGCTGGA	5	-	2326	2793
ENSDARG00000012060	ENSDART00000043133	19	20	20	GTATCCCACCTGTGGACGGTGAG	5	-	2567	2793
ENSDARG00000012060	ENSDART00000090825	19	1	1	ACATACAGAACAAGCAGGTTTGGCA	7	-	29	2787
ENSDARG00000012060	ENSDART00000090825	19	2	2	AAACGCCTCCGAGTTTGGGTGGCA	6	-	200	2787
ENSDARG00000012060	ENSDART00000090825	19	2	2	AACGCCTCCGAGTTTGGGTGGCA	5	-	200	2787
ENSDARG00000012060	ENSDART00000090825	19	3	3	TCCCTCTGCGAGAGCAGGGTTTTGT	7	-	345	2787
ENSDARG00000012060	ENSDART00000090825	19	3	3	ATCCACAGATTCCGCCTCTGATGGA	7	-	489	2787
ENSDARG00000012060	ENSDART00000090825	19	8	8	ACATCATGCTCTCCATGCAGCTTAC	7	-	865	2787
ENSDARG00000012060	ENSDART00000090825	19	9	9	ACCAACCCCTTTGAGTGTTGGAC	5	-	983	2787
ENSDARG00000012060	ENSDART00000090825	19	9	9	TTCCAAACCAACCCCTTTGAGTGT	6	-	988	2787
ENSDARG00000012060	ENSDART00000090825	19	9	9	AACCAACCCCTTTGAGTGTTGGAC	6	-	983	2787
ENSDARG00000012060	ENSDART00000090825	19	9	9	AAACCAACCCCTTTGAGTGTTGGAC	7	-	983	2787
ENSDARG00000012060	ENSDART00000090825	19	9	9	TCCAAACCAACCCCTTTGAGTGT	5	-	988	2787
ENSDARG00000012060	ENSDART00000090825	19	11	11	TGCGTCCCATCACACAGTGTGAGTT	7	-	1216	2787
ENSDARG00000012060	ENSDART00000090825	19	11	11	TGCAAAACAGCCTACAGTCTGATTT	7	-	1149	2787
ENSDARG00000012060	ENSDART00000090825	19	11	11	CAAAACAGCCTACAGTCTGATTT	5	-	1149	2787
ENSDARG00000012060	ENSDART00000090825	19	11	11	CAAAACAGCCTACAGTCTGATTTC	6	-	1148	2787
ENSDARG00000012060	ENSDART00000090825	19	13	13	TCCTCCTGCCCAGAGTTTGGAGTG	6	-	1386	2787
ENSDARG00000012060	ENSDART00000090825	19	13	13	GTATCCTCCTGCCCAGAGTTTGGA	6	-	1389	2787
ENSDARG00000012060	ENSDART00000090825	19	13	13	TCCTGCCCAGAGTTTGGAGTGTTT	6	-	1383	2787
ENSDARG00000012060	ENSDART00000090825	19	14	14	GTATCAAGCTGATCGCCGTTGGG	5	-	1567	2787
ENSDARG00000012060	ENSDART00000090825	19	14	14	GCAAGCATCACCATAGGAGTCTGT	6	-	1525	2787
ENSDARG00000012060	ENSDART00000090825	19	15	15	ACCATCTCCATCTCGGTCTGTCTGC	7	-	1686	2787
ENSDARG00000012060	ENSDART00000090825	19	15	15	CTAACCTGCAGTGGGTCGTTGAC	5	-	1741	2787
ENSDARG00000012060	ENSDART00000090825	19	20	20	ATCAACACCATTAAATGCTGTGTAG	7	-	2235	2787
ENSDARG00000012060	ENSDART00000090825	19	20	20	GTAATCATCATCAGTGGCTGTGTTC	7	-	2280	2787
ENSDARG00000012060	ENSDART00000090825	19	20	20	CACATCACCACATAGAAGCTGGA	5	-	2335	2787
ENSDARG00000012060	ENSDART00000090825	19	21	21	GTATCCCACCTGTGGACGGTGAG	5	-	2576	2787
ENSDARG00000012113	ENSDART00000024777	19	1	1	GCCGCCAAAGATGCGTTTGATGGC	6	+	121	654
ENSDARG00000012113	ENSDART00000024777	19	1	1	CGCCAAAGATGCGTTTGATGGCGGT	7	+	123	654
ENSDARG00000012113	ENSDART00000024777	19	1	1	AAAGGCCGCCAAAGATGCGTTTGAT	7	+	117	654
ENSDARG00000012113	ENSDART00000024777	19	1	1	AAACTAGCCGAGAAAATGTGAGTTT	7	+	310	654
ENSDARG00000012113	ENSDART00000024777	19	2	2	GTCTCAGACATGCTGGAGTGGCT	5	+	454	654
ENSDARG00000012113	ENSDART00000024777	19	2	2	TGCGTCTCCAGATCAGCCGTCTGT	6	+	424	654
ENSDARG00000012113	ENSDART00000024777	19	3	3	GCCGGCTCCTCCTTCAGACGCTGAC	7	+	518	654
ENSDARG00000012135	ENSDART00000018328	19	1	1	AACGGCATCACCAAGGGCAGATTTG	7	+	13	1296
ENSDARG00000012135	ENSDART00000018328	19	9	9	TGCAGCAACATCACAGACGCTTCT	6	+	766	1296
ENSDARG00000012135	ENSDART00000018328	19	9	9	TGCAGCAAATCACAGACGACGGC	5	+	689	1296
ENSDARG00000012135	ENSDART00000018328	19	9	9	GTTGCCACAAGCTGCAGATGGTTTG	7	+	731	1296
ENSDARG00000012135	ENSDART00000018328	19	9	9	GACGACGGCTTTGTGAGTTTGTG	5	+	703	1296
ENSDARG00000012135	ENSDART00000018328	19	9	9	CAAATCACAGACGACGGCTTTGTG	6	+	694	1296
ENSDARG00000012135	ENSDART00000018328	19	9	9	ACAAGCTGCAGATGGTTTGCATTT	6	+	737	1296
ENSDARG00000012135	ENSDART00000018328	19	9	9	ACAGACGACGGCTTTGTGAGTTT	5	+	700	1296
ENSDARG00000012135	ENSDART00000018328	19	12	12	ATCCACTGCCCTCGGCTGCAGGC	5	+	961	1296
ENSDARG00000012135	ENSDART00000018328	19	12	12	CTCGGCTGCAGGCGCTGGTGAGTG	6	+	971	1296
ENSDARG00000012135	ENSDART00000018328	19	12	12	CTCGGCTGCAGGCGCTGGTGAGTGC	7	+	971	1296
ENSDARG00000012135	ENSDART00000018328	19	12	12	GCCCTCGGCTGCAGGCGCTGGTGAG	7	+	968	1296
ENSDARG00000012135	ENSDART00000018328	19	13	13	TCCGCCACCTGAGCAGCAGTGTGT	6	+	1025	1296
ENSDARG00000012135	ENSDART00000018328	19	13	13	ACCTCAAGAACTGCCAGCGGCTGGA	7	+	1118	1296
ENSDARG00000012135	ENSDART00000018328	19	13	13	CTCTACGACTGCCAGCAGGTGTC	5	+	1153	1296
ENSDARG00000012135	ENSDART00000018328	19	13	13	AGCGCCTGCAGGTGGTGGAGCTGGA	7	+	1058	1296
ENSDARG00000012135	ENSDART00000018328	19	14	14	GTCAGCGTCTGTGCCGCTGCTGCG	6	+	1274	1296
ENSDARG00000012135	ENSDART00000018328	19	14	14	ACCTCCATCAGTGCACGGCGGAGGT	7	+	1251	1296
ENSDARG00000012138	ENSDART00000006501	19	2	2	TGCGACTTAGAGAGGATGGTGAC	5	-	49	1242
ENSDARG00000012138	ENSDART00000006501	19	2	2	ACAAAAAGCACTCCGGCAGAAGGA	6	-	90	1242
ENSDARG00000012138	ENSDART00000006501	19	6	6	AACTTCTTATCGCAGCTGATGAC	5	-	700	1242
ENSDARG00000012138	ENSDART00000006501	19	9	9	CACGTCTGCGTCTGCATAAGTGGCA	7	-	1172	1242
ENSDARG00000012138	ENSDART00000006501	19	9	9	GTCTGCGTCTGCATAAGTGGCATGC	7	-	1169	1242
ENSDARG00000012138	ENSDART00000102807	19	2	2	GTCTGCGTCTGCATAAGTGGCATGC	7	-	221	366
ENSDARG00000012138	ENSDART00000102807	19	2	2	CACGTCTGCGTCTGCATAAGTGGCA	7	-	224	366
ENSDARG00000012422	ENSDART00000033363	19	2	2	CACACCTTCAGGAAGGGAAGGCAAC	7	-	120	5085
ENSDARG00000012422	ENSDART00000033363	19	2	2	CAAAACATCTACTGGATCTGTAGGA	7	-	84	5085
ENSDARG00000012422	ENSDART00000033363	19	3	3	GCCGTCAGCCAGGTTGACGCCTTT	6	-	439	5085
ENSDARG00000012422	ENSDART00000033363	19	3	3	CCCAGCTCCAGCCCAAGCTGCTGCA	7	-	347	5085
ENSDARG00000012422	ENSDART00000033363	19	4	4	AAAACCTCCTCATCCAGGAGACGGG	7	-	599	5085
ENSDARG00000012422	ENSDART00000033363	19	4	4	AACCTCCTCATCCAGGAGACGGG	5	-	599	5085
ENSDARG00000012422	ENSDART00000033363	19	5	5	GTACTCACATAGGTGTTTGGGTC	5	-	736	5085
ENSDARG00000012422	ENSDART00000033363	19	29	29	ACCATCTTCTCCTCTTGGGCCGGG	6	-	2053	5085
ENSDARG00000012422	ENSDART00000033363	19	60	60	AGAATCTTACTGGCGTCGATGGA	5	-	4312	5085
ENSDARG00000012422	ENSDART00000033363	19	60	60	GAACTCAGAGCCAGTGGTGTCGGC	6	-	4357	5085
ENSDARG00000012422	ENSDART00000033363	19	61	61	ACATTCTCCACTGCTTTGCTGGG	5	-	4624	5085
ENSDARG00000012422	ENSDART00000033363	19	61	61	ACATTCTCCACTGCTTTGCTGGGAT	7	-	4622	5085
ENSDARG00000012422	ENSDART00000033363	19	63	63	GCAGCCGTCGATGAGGGCTTTGAT	6	-	4924	5085
ENSDARG00000012422	ENSDART00000033363	19	63	63	GTATCCGCCGTCGGTGGTTTGGT	5	-	4838	5085
ENSDARG00000012422	ENSDART00000033363	19	63	63	GTATCCGCCGTCGGTGGTTTGGTC	6	-	4837	5085
ENSDARG00000012422	ENSDART00000033363	19	64	64	TTCAAAACCAAATTTCTGATTGT	5	-	5048	5085
ENSDARG00000012422	ENSDART00000033363	19	64	64	AGCTGCTCCACCTGAGGTGTGTTC	6	-	4986	5085
ENSDARG00000012422	ENSDART00000104799	19	2	2	CAAAACATCTACTGGATCTGTAGGA	7	-	84	5631
ENSDARG00000012422	ENSDART00000104799	19	2	2	CACACCTTCAGGAAGGGAAGGCAAC	7	-	120	5631
ENSDARG00000012422	ENSDART00000104799	19	3	3	GCCGTCAGCCAGGTTGACGCCTTT	6	-	439	5631
ENSDARG00000012422	ENSDART00000104799	19	3	3	CCCAGCTCCAGCCCAAGCTGCTGCA	7	-	347	5631
ENSDARG00000012422	ENSDART00000104799	19	4	4	AAAACCTCCTCATCCAGGAGACGGG	7	-	599	5631
ENSDARG00000012422	ENSDART00000104799	19	4	4	AACCTCCTCATCCAGGAGACGGG	5	-	599	5631
ENSDARG00000012422	ENSDART00000104799	19	5	5	GTACTCACATAGGTGTTTGGGTC	5	-	736	5631
ENSDARG00000012422	ENSDART00000104799	19	6	6	GGCAAAGGCACGGGGGTGGGTTTG	6	-	1338	5631
ENSDARG00000012422	ENSDART00000104799	19	6	6	GGCAAAGGCACGGGGGTGGGTTT	5	-	1339	5631
ENSDARG00000012422	ENSDART00000104799	19	28	28	ACCATCTTCTCCTCTTGGGCCGGG	6	-	2599	5631
ENSDARG00000012422	ENSDART00000104799	19	59	59	AGAATCTTACTGGCGTCGATGGA	5	-	4858	5631
ENSDARG00000012422	ENSDART00000104799	19	59	59	GAACTCAGAGCCAGTGGTGTCGGC	6	-	4903	5631
ENSDARG00000012422	ENSDART00000104799	19	60	60	ACATTCTCCACTGCTTTGCTGGG	5	-	5170	5631
ENSDARG00000012422	ENSDART00000104799	19	60	60	ACATTCTCCACTGCTTTGCTGGGAT	7	-	5168	5631
ENSDARG00000012422	ENSDART00000104799	19	62	62	GCAGCCGTCGATGAGGGCTTTGAT	6	-	5470	5631
ENSDARG00000012422	ENSDART00000104799	19	62	62	GTATCCGCCGTCGGTGGTTTGGT	5	-	5384	5631
ENSDARG00000012422	ENSDART00000104799	19	62	62	GTATCCGCCGTCGGTGGTTTGGTC	6	-	5383	5631
ENSDARG00000012422	ENSDART00000104799	19	63	63	AGCTGCTCCACCTGAGGTGTGTTC	6	-	5532	5631
ENSDARG00000012422	ENSDART00000104799	19	63	63	TTCAAAACCAAATTTCTGATTGT	5	-	5594	5631
ENSDARG00000012515	ENSDART00000085619	19	3	3	GTAACCGCAAGAAGTGAAGAATAC	6	-	251	1230
ENSDARG00000012515	ENSDART00000085619	19	3	3	ACAGTCATCCTGTGTGCGGCTGCC	6	-	229	1230
ENSDARG00000012515	ENSDART00000085619	19	3	3	ACAGTCATCCTGTGTGCGGCTGC	5	-	230	1230
ENSDARG00000012515	ENSDART00000085619	19	4	4	TGCAGCTCCGCCTGTTTGGAGTG	5	-	539	1230
ENSDARG00000012515	ENSDART00000085619	19	4	4	TCCTGCAGCTCCGCCTGTTTGGAG	6	-	541	1230
ENSDARG00000012515	ENSDART00000085619	19	4	4	GGCGTCTTCTCTTGCTCTTGAGAA	6	-	445	1230
ENSDARG00000012515	ENSDART00000085619	19	4	4	GAAAAACTCTGAAGGGGCGTCTTC	6	-	460	1230
ENSDARG00000012515	ENSDART00000085619	19	4	4	AGCTCCGCCTGTTTGGAGTGTAA	5	-	536	1230
ENSDARG00000012515	ENSDART00000085619	19	7	7	ACATTCACCTTTGCTTTGGTTGC	5	-	856	1230
ENSDARG00000012515	ENSDART00000085619	19	9	9	TTCACCTGCTCCAGGTGGAAGGT	5	-	1045	1230
ENSDARG00000012515	ENSDART00000085619	19	9	9	AGAGCCTCCAGTTTGCTGCTGCG	5	-	1112	1230
ENSDARG00000012515	ENSDART00000085619	19	9	9	GTTTGCTGCTGCGGCTGCTGTTGTT	7	-	1100	1230
ENSDARG00000012688	ENSDART00000009132	19	2	2	TTCAACAGCGGAACGGGCGGAAGAC	7	+	113	339
ENSDARG00000012745	ENSDART00000023046	19	1	1	TTCCACCCATTGAGGAGGAAGAG	5	+	161	1746
ENSDARG00000012745	ENSDART00000023046	19	1	1	TTCACCTCCATCTCTGGCTGATAA	6	+	105	1746
ENSDARG00000012745	ENSDART00000023046	19	1	1	GACTCCAACGCTCCTGGAGAATAC	6	+	232	1746
ENSDARG00000012745	ENSDART00000023046	19	1	1	CAAGACAACAGGATGCATGAGTA	5	+	373	1746
ENSDARG00000012745	ENSDART00000023046	19	1	1	ACCTTCCACCCATTGAGGAGGAA	5	+	158	1746
ENSDARG00000012745	ENSDART00000023046	19	2	2	AGAACCATCCACAGTGTGCTGGA	5	+	481	1746
ENSDARG00000012745	ENSDART00000023046	19	2	2	ACATCATTCTAGTTGACGACTTC	5	+	530	1746
ENSDARG00000012745	ENSDART00000023046	19	2	2	ACCATCCACAGTGTGCTGGAGAC	5	+	484	1746
ENSDARG00000012745	ENSDART00000023046	19	2	2	CACACCGGCTGTCCTGCTGAAGGA	6	+	507	1746
ENSDARG00000012745	ENSDART00000023046	19	2	2	GAACCATCCACAGTGTGCTGGAGAC	7	+	482	1746
ENSDARG00000012745	ENSDART00000023046	19	2	2	GACTTCAGCGATAGAGGTGAGGGG	6	+	547	1746
ENSDARG00000012745	ENSDART00000023046	19	3	3	GCCACCTACGCTACAGGAAGCGTGC	7	+	667	1746
[truncated: 10,339 more rows]
