# Supplementary material for: Rapid Mutation of Endogenous Zebrafish Genes Using Zinc Finger Nucleases Made by Oligomerized Pool ENgineering (OPEN)
Source: PLoS One. 2009 Feb 9;4(2):e4348. doi: 10.1371/journal.pone.0004348 (PMC2634973; doi:10.1371/journal.pone.0004348)
Supplement: Table S20 — Potential OPEN ZFN target sites in gene transcripts encoded on zebrafish chromosome 20. Data presented as described in the legend to Table S1. (2.79 MB XLS) [file pone.0004348.s020.xls]

## Sheet: Chromosome20
Gene ID	Transcript ID	Chromosome Number	Exon Number	Coding Exon Number	TargetSite	ZFN Spacer Length	Strand	ZFN Cleavage Site	Coding Sequence Length
ENSDARG00000000161	ENSDART00000000170	20	1	1	TCCACCACCTCCCTTGCGAGTAA	5	+	31	4254
ENSDARG00000000161	ENSDART00000000170	20	1	1	GCCTCAGTCATCCCGTCTGAAGTA	6	+	87	4254
ENSDARG00000000161	ENSDART00000000170	20	1	1	CTCCACCACCTCCCTTGCGAGTAA	6	+	30	4254
ENSDARG00000000161	ENSDART00000000170	20	5	5	AGCAGCAGAGGAGAGAGGAGGAG	5	+	536	4254
ENSDARG00000000161	ENSDART00000000170	20	5	5	AGCAGCAGAGGAGAGAGGAGGAGCG	7	+	536	4254
ENSDARG00000000161	ENSDART00000000170	20	6	6	GACAAAGACGGAGGGAATGGGAG	5	+	794	4254
ENSDARG00000000161	ENSDART00000000170	20	6	6	AGAGACTAAAGGACAGGAAGAGGAG	7	+	872	4254
ENSDARG00000000161	ENSDART00000000170	20	6	6	AGACTCAGAAAGAAAAGGAGCAGAA	7	+	839	4254
ENSDARG00000000161	ENSDART00000000170	20	7	7	GTCAGCTGCGTGATGCTAAGAGTAA	7	+	947	4254
ENSDARG00000000161	ENSDART00000000170	20	10	10	AGAGACACAGGAAAGAGGAAGAG	5	+	1370	4254
ENSDARG00000000161	ENSDART00000000170	20	11	11	ACAGGCCCAGTTGGAGCAGGAGCG	6	+	1428	4254
ENSDARG00000000161	ENSDART00000000170	20	11	11	AGAGCCAAAGAGGAGAAGAGGAG	5	+	1570	4254
ENSDARG00000000161	ENSDART00000000170	20	12	12	AGCTCACGCTGGAGGCAGACTGT	5	+	1760	4254
ENSDARG00000000161	ENSDART00000000170	20	13	13	ACAGTCAGAGAGACCGGCTGGCTGT	7	+	1804	4254
ENSDARG00000000161	ENSDART00000000170	20	13	13	AGACTCAACCGACCGCAGCTGAA	5	+	1898	4254
ENSDARG00000000161	ENSDART00000000170	20	13	13	GTTTCCAGAGAGCTATGCTGAGAG	6	+	1857	4254
ENSDARG00000000161	ENSDART00000000170	20	17	17	AACTCAAACAGCTGGTGGCTTGGTG	7	+	2434	4254
ENSDARG00000000161	ENSDART00000000170	20	17	17	GAACTCAAACAGCTGGTGGCTTG	5	+	2433	4254
ENSDARG00000000161	ENSDART00000000170	20	17	17	CAACAACACCAGAGCAGCTGAGTCT	7	+	2375	4254
ENSDARG00000000161	ENSDART00000000170	20	17	17	TGCAACAACACCAGAGCAGCTGAG	6	+	2373	4254
ENSDARG00000000161	ENSDART00000000170	20	17	17	AACAACACCAGAGCAGCTGAGTCT	6	+	2376	4254
ENSDARG00000000161	ENSDART00000000170	20	19	19	TCCAACTAATTATGTGAAGATGAC	6	+	2706	4254
ENSDARG00000000161	ENSDART00000000170	20	19	19	GTTTCCAACTAATTATGTGAAGAT	6	+	2703	4254
ENSDARG00000000161	ENSDART00000000170	20	20	20	AGCTCATTCAGACAGAAGAGTCT	5	+	2825	4254
ENSDARG00000000161	ENSDART00000000170	20	22	22	CTCAACGCAGCTGCTCTGTTGCA	5	+	3103	4254
ENSDARG00000000161	ENSDART00000000170	20	22	22	CGCAGCTGCTCTGTTGCAGCAGAA	6	+	3108	4254
ENSDARG00000000161	ENSDART00000000170	20	22	22	CAACGCAGCTGCTCTGTTGCAGCA	6	+	3105	4254
ENSDARG00000000161	ENSDART00000000170	20	24	24	GCAGGCGGCGCTGGAGCAGGCGGA	6	+	3312	4254
ENSDARG00000000161	ENSDART00000000170	20	24	24	GACCACTCCAATCTGCAGGCGGC	5	+	3298	4254
ENSDARG00000000161	ENSDART00000000170	20	25	25	GAAAACTGCTGCACAGCGGCAAAC	6	+	3476	4254
ENSDARG00000000161	ENSDART00000037890	20	1	1	CTCATCAACACAGGTGGCTTTTCT	6	+	4	2256
ENSDARG00000000161	ENSDART00000037890	20	1	1	AACTCCAGAAGAGAGGGGGAAAC	5	+	39	2256
ENSDARG00000000161	ENSDART00000037890	20	4	4	AGACGCCCACCCCTGTGATGACGTC	7	+	299	2256
ENSDARG00000000161	ENSDART00000037890	20	4	4	GCAGACGCCCACCCCTGTGATGAC	6	+	297	2256
ENSDARG00000000161	ENSDART00000037890	20	4	4	GACGCCCACCCCTGTGATGACGTC	6	+	300	2256
ENSDARG00000000161	ENSDART00000037890	20	5	5	CTCTCCGCCATGTCGGTGATGCC	5	+	358	2256
ENSDARG00000000161	ENSDART00000037890	20	7	7	TTCCCAGTCTCCAGTGGTTTGAC	5	+	583	2256
ENSDARG00000000161	ENSDART00000037890	20	8	8	TCCACCACCTCCCTTGCGAGTAA	5	+	655	2256
ENSDARG00000000161	ENSDART00000037890	20	8	8	GCCTCAGTCATCCCGTCTGAAGTA	6	+	711	2256
ENSDARG00000000161	ENSDART00000037890	20	8	8	CTCCACCACCTCCCTTGCGAGTAA	6	+	654	2256
ENSDARG00000000161	ENSDART00000037890	20	12	12	AGCAGCAGAGGAGAGAGGAGGAGCG	7	+	1160	2256
ENSDARG00000000161	ENSDART00000037890	20	12	12	AGCAGCAGAGGAGAGAGGAGGAG	5	+	1160	2256
ENSDARG00000000161	ENSDART00000037890	20	14	14	AGACTCAGAAAGAAAAGGAGCAGAA	7	+	1448	2256
ENSDARG00000000161	ENSDART00000037890	20	14	14	AGAGACTAAAGGACAGGAAGAGGAG	7	+	1481	2256
ENSDARG00000000161	ENSDART00000037890	20	14	14	GACAAAGACGGAGGGAATGGGAG	5	+	1403	2256
ENSDARG00000000161	ENSDART00000037890	20	15	15	GTCAGCTGCGTGATGCTAAGAGTAA	7	+	1556	2256
ENSDARG00000000161	ENSDART00000037890	20	18	18	AGAGACACAGGAAAGAGGAAGAG	5	+	1979	2256
ENSDARG00000000161	ENSDART00000037890	20	20	20	AGAGCCAAAGAGGAGAAGAGGAG	5	+	2191	2256
ENSDARG00000000161	ENSDART00000037890	20	20	20	ACAGGCCCAGTTGGAGCAGGAGCG	6	+	2049	2256
ENSDARG00000000161	ENSDART00000062780	20	1	1	CTCATCAACACAGGTGGCTTTTCT	6	+	1	4992
ENSDARG00000000161	ENSDART00000062780	20	1	1	AACTCCAGAAGAGAGGGGGAAAC	5	+	36	4992
ENSDARG00000000161	ENSDART00000062780	20	3	3	GCAGACGCCCACCCCTGTGATGAC	6	+	294	4992
ENSDARG00000000161	ENSDART00000062780	20	3	3	GACGCCCACCCCTGTGATGACGTC	6	+	297	4992
ENSDARG00000000161	ENSDART00000062780	20	3	3	AGACGCCCACCCCTGTGATGACGTC	7	+	296	4992
ENSDARG00000000161	ENSDART00000062780	20	4	4	CTCTCCGCCATGTCGGTGATGCC	5	+	355	4992
ENSDARG00000000161	ENSDART00000062780	20	5	5	TTCCCAGTCTCCAGTGGTTTGAC	5	+	529	4992
ENSDARG00000000161	ENSDART00000062780	20	6	6	CTCCACCACCTCCCTTGCGAGTAA	6	+	600	4992
ENSDARG00000000161	ENSDART00000062780	20	6	6	TCCACCACCTCCCTTGCGAGTAA	5	+	601	4992
ENSDARG00000000161	ENSDART00000062780	20	6	6	GCCTCAGTCATCCCGTCTGAAGTA	6	+	657	4992
ENSDARG00000000161	ENSDART00000062780	20	10	10	AGCAGCAGAGGAGAGAGGAGGAG	5	+	1106	4992
ENSDARG00000000161	ENSDART00000062780	20	10	10	AGCAGCAGAGGAGAGAGGAGGAGCG	7	+	1106	4992
ENSDARG00000000161	ENSDART00000062780	20	11	11	AGAGACTAAAGGACAGGAAGAGGAG	7	+	1442	4992
ENSDARG00000000161	ENSDART00000062780	20	11	11	AGACTCAGAAAGAAAAGGAGCAGAA	7	+	1409	4992
ENSDARG00000000161	ENSDART00000062780	20	11	11	GACAAAGACGGAGGGAATGGGAG	5	+	1364	4992
ENSDARG00000000161	ENSDART00000062780	20	12	12	GTCAGCTGCGTGATGCTAAGAGTAA	7	+	1517	4992
ENSDARG00000000161	ENSDART00000062780	20	15	15	AGAGACACAGGAAAGAGGAAGAG	5	+	1940	4992
ENSDARG00000000161	ENSDART00000062780	20	16	16	AGAGCCAAAGAGGAGAAGAGGAG	5	+	2140	4992
ENSDARG00000000161	ENSDART00000062780	20	16	16	ACAGGCCCAGTTGGAGCAGGAGCG	6	+	1998	4992
ENSDARG00000000161	ENSDART00000062780	20	17	17	AGCTCACGCTGGAGGCAGACTGT	5	+	2330	4992
ENSDARG00000000161	ENSDART00000062780	20	18	18	GTTTCCAGAGAGCTATGCTGAGAG	6	+	2427	4992
ENSDARG00000000161	ENSDART00000062780	20	18	18	ACAGTCAGAGAGACCGGCTGGCTGT	7	+	2374	4992
ENSDARG00000000161	ENSDART00000062780	20	18	18	AGACTCAACCGACCGCAGCTGAA	5	+	2468	4992
ENSDARG00000000161	ENSDART00000062780	20	24	24	TGCAACAACACCAGAGCAGCTGAG	6	+	3111	4992
ENSDARG00000000161	ENSDART00000062780	20	24	24	CAACAACACCAGAGCAGCTGAGTCT	7	+	3113	4992
ENSDARG00000000161	ENSDART00000062780	20	24	24	GAACTCAAACAGCTGGTGGCTTG	5	+	3171	4992
ENSDARG00000000161	ENSDART00000062780	20	24	24	AACAACACCAGAGCAGCTGAGTCT	6	+	3114	4992
ENSDARG00000000161	ENSDART00000062780	20	24	24	AACTCAAACAGCTGGTGGCTTGGTG	7	+	3172	4992
ENSDARG00000000161	ENSDART00000062780	20	26	26	TCCAACTAATTATGTGAAGATGAC	6	+	3444	4992
ENSDARG00000000161	ENSDART00000062780	20	26	26	GTTTCCAACTAATTATGTGAAGAT	6	+	3441	4992
ENSDARG00000000161	ENSDART00000062780	20	27	27	AGCTCATTCAGACAGAAGAGTCT	5	+	3563	4992
ENSDARG00000000161	ENSDART00000062780	20	29	29	CAACGCAGCTGCTCTGTTGCAGCA	6	+	3843	4992
ENSDARG00000000161	ENSDART00000062780	20	29	29	CGCAGCTGCTCTGTTGCAGCAGAA	6	+	3846	4992
ENSDARG00000000161	ENSDART00000062780	20	29	29	CTCAACGCAGCTGCTCTGTTGCA	5	+	3841	4992
ENSDARG00000000161	ENSDART00000062780	20	31	31	GACCACTCCAATCTGCAGGCGGC	5	+	4036	4992
ENSDARG00000000161	ENSDART00000062780	20	31	31	GCAGGCGGCGCTGGAGCAGGCGGA	6	+	4050	4992
ENSDARG00000000161	ENSDART00000062780	20	32	32	GAAAACTGCTGCACAGCGGCAAAC	6	+	4214	4992
ENSDARG00000000161	ENSDART00000064027	20	1	1	AACTCCAGAAGAGAGGGGGAAAC	5	+	60	5130
ENSDARG00000000161	ENSDART00000064027	20	1	1	CTCATCAACACAGGTGGCTTTTCT	6	+	25	5130
ENSDARG00000000161	ENSDART00000064027	20	4	4	GCAGACGCCCACCCCTGTGATGAC	6	+	318	5130
ENSDARG00000000161	ENSDART00000064027	20	4	4	GACGCCCACCCCTGTGATGACGTC	6	+	321	5130
ENSDARG00000000161	ENSDART00000064027	20	4	4	AGACGCCCACCCCTGTGATGACGTC	7	+	320	5130
ENSDARG00000000161	ENSDART00000064027	20	8	8	TCCACCACCTCCCTTGCGAGTAA	5	+	553	5130
ENSDARG00000000161	ENSDART00000064027	20	8	8	GCCTCAGTCATCCCGTCTGAAGTA	6	+	609	5130
ENSDARG00000000161	ENSDART00000064027	20	8	8	CTCCACCACCTCCCTTGCGAGTAA	6	+	552	5130
ENSDARG00000000161	ENSDART00000064027	20	13	13	AGCAGCAGAGGAGAGAGGAGGAGCG	7	+	1088	5130
ENSDARG00000000161	ENSDART00000064027	20	13	13	AGCAGCAGAGGAGAGAGGAGGAG	5	+	1088	5130
ENSDARG00000000161	ENSDART00000064027	20	16	16	GACAAAGACGGAGGGAATGGGAG	5	+	1298	5130
ENSDARG00000000161	ENSDART00000064027	20	16	16	AGAGACTAAAGGACAGGAAGAGGAG	7	+	1376	5130
ENSDARG00000000161	ENSDART00000064027	20	16	16	AGACTCAGAAAGAAAAGGAGCAGAA	7	+	1343	5130
ENSDARG00000000161	ENSDART00000064027	20	17	17	GTCAGCTGCGTGATGCTAAGAGTAA	7	+	1451	5130
ENSDARG00000000161	ENSDART00000064027	20	21	21	AGAGACACAGGAAAGAGGAAGAG	5	+	1939	5130
ENSDARG00000000161	ENSDART00000064027	20	25	25	AGCTCACGCTGGAGGCAGACTGT	5	+	2204	5130
ENSDARG00000000161	ENSDART00000064027	20	26	26	GTTTCCAGAGAGCTATGCTGAGAG	6	+	2301	5130
ENSDARG00000000161	ENSDART00000064027	20	26	26	ACAGTCAGAGAGACCGGCTGGCTGT	7	+	2248	5130
ENSDARG00000000161	ENSDART00000064027	20	26	26	AGACTCAACCGACCGCAGCTGAA	5	+	2342	5130
ENSDARG00000000161	ENSDART00000064027	20	33	33	ATCCTCTTCTGATTATGTGTGTGT	6	+	2664	5130
ENSDARG00000000161	ENSDART00000064027	20	38	38	AACAACACCAGAGCAGCTGAGTCT	6	+	3237	5130
ENSDARG00000000161	ENSDART00000064027	20	38	38	TGCAACAACACCAGAGCAGCTGAG	6	+	3234	5130
ENSDARG00000000161	ENSDART00000064027	20	38	38	GAACTCAAACAGCTGGTGGCTTG	5	+	3294	5130
ENSDARG00000000161	ENSDART00000064027	20	38	38	CAACAACACCAGAGCAGCTGAGTCT	7	+	3236	5130
ENSDARG00000000161	ENSDART00000064027	20	38	38	AACTCAAACAGCTGGTGGCTTGGTG	7	+	3295	5130
ENSDARG00000000161	ENSDART00000064027	20	40	40	CTCCTCTTCCCCCTGTAGTGTGT	5	+	3431	5130
ENSDARG00000000161	ENSDART00000064027	20	40	40	TCCAACTAATTATGTGAAGATGAC	6	+	3591	5130
ENSDARG00000000161	ENSDART00000064027	20	40	40	GTTTCCAACTAATTATGTGAAGAT	6	+	3588	5130
ENSDARG00000000161	ENSDART00000064027	20	41	41	AGCTCATTCAGACAGAAGAGTCT	5	+	3710	5130
ENSDARG00000000161	ENSDART00000064027	20	43	43	CGCAGCTGCTCTGTTGCAGCAGAA	6	+	3993	5130
ENSDARG00000000161	ENSDART00000064027	20	43	43	CAACGCAGCTGCTCTGTTGCAGCA	6	+	3990	5130
ENSDARG00000000161	ENSDART00000064027	20	43	43	CTCAACGCAGCTGCTCTGTTGCA	5	+	3988	5130
ENSDARG00000000161	ENSDART00000064027	20	45	45	GCAGGCGGCGCTGGAGCAGGCGGA	6	+	4197	5130
ENSDARG00000000161	ENSDART00000064027	20	45	45	GACCACTCCAATCTGCAGGCGGC	5	+	4183	5130
ENSDARG00000000161	ENSDART00000064027	20	46	46	GAAAACTGCTGCACAGCGGCAAAC	6	+	4361	5130
ENSDARG00000001807	ENSDART00000037855	20	2	2	GGCACCTTCACTCGGGGTGAAAAC	6	+	250	1911
ENSDARG00000001807	ENSDART00000037855	20	2	2	AGCTGCTGCTTACTGTGGTCGGT	5	+	44	1911
ENSDARG00000001807	ENSDART00000037855	20	2	2	TGCCACCGCTGTCAGAGACGCTGCC	7	+	286	1911
ENSDARG00000001807	ENSDART00000037855	20	2	2	AAAGGCACAAAGAAGACTGATAA	5	+	574	1911
ENSDARG00000001807	ENSDART00000037855	20	2	2	TGCTGCTTACTGTGGTCGGTGAC	5	+	47	1911
ENSDARG00000001807	ENSDART00000037855	20	3	3	ACACACAGCTAGTACAGCAGTTTTG	7	+	681	1911
ENSDARG00000001807	ENSDART00000037855	20	3	3	AGCTGCAGATATCCAGGATGAAGCT	7	+	708	1911
ENSDARG00000001807	ENSDART00000037855	20	3	3	TCCAGCACAGACCAAGGAGAGGTG	6	+	1167	1911
ENSDARG00000001807	ENSDART00000037855	20	3	3	CTACTCAAATGGTCAAGGTGAGTTT	7	+	1197	1911
ENSDARG00000001807	ENSDART00000037855	20	3	3	CTAACCATCAGGGTGTGGAGTCT	5	+	899	1911
ENSDARG00000001807	ENSDART00000037855	20	4	4	GTTGACATCCTGAAGTTGGTGGC	5	+	1216	1911
ENSDARG00000001807	ENSDART00000037855	20	4	4	TGCCACAGAGCGAGAGGTGGCCGCC	7	+	1287	1911
ENSDARG00000001807	ENSDART00000037855	20	4	4	GCCAACGCCGCATTGACGTGGTG	5	+	1421	1911
ENSDARG00000001807	ENSDART00000037855	20	4	4	CTCTTCACCGCCAACGCCGCATTG	6	+	1412	1911
ENSDARG00000001807	ENSDART00000037855	20	4	4	CGCCAACGCCGCATTGACGTGGTG	6	+	1420	1911
ENSDARG00000001807	ENSDART00000037855	20	4	4	CAACGCCGCATTGACGTGGTGGAC	6	+	1423	1911
ENSDARG00000001807	ENSDART00000037855	20	4	4	AACGCCGCATTGACGTGGTGGAC	5	+	1424	1911
ENSDARG00000001807	ENSDART00000037855	20	5	5	ACAAGCTAATGACGGCTGTGAATGT	7	+	1490	1911
ENSDARG00000001807	ENSDART00000037855	20	5	5	GCCCCAGTCATAAGCCTTTGGAGTC	7	+	1529	1911
ENSDARG00000001807	ENSDART00000037855	20	6	6	GAAGCCAGCCAAACGCTGCTGGA	5	+	1867	1911
ENSDARG00000001807	ENSDART00000037855	20	6	6	ACCTTCAGCCCATTTTTGACGAT	5	+	1739	1911
ENSDARG00000001891	ENSDART00000045840	20	1	1	GCCCAAAACAGCAGTGCTGTCGCT	6	-	238	1191
ENSDARG00000001891	ENSDART00000045840	20	1	1	CCCAAAACAGCAGTGCTGTCGCT	5	-	238	1191
ENSDARG00000001891	ENSDART00000045840	20	1	1	GGCCCAAAACAGCAGTGCTGTCGCT	7	-	238	1191
ENSDARG00000001891	ENSDART00000045840	20	1	1	CACTTCCACTACCCTCTGCAGAG	5	-	141	1191
ENSDARG00000001891	ENSDART00000045840	20	1	1	CAAAACAGCAGTGCTGTCGCTGGG	6	-	235	1191
ENSDARG00000001891	ENSDART00000045840	20	2	2	GCCCTCTGCTTCTTGGTGGGCAGTA	7	-	452	1191
ENSDARG00000001891	ENSDART00000045840	20	2	2	GTCACCGTCACCGCAAGCCGTTGCT	7	-	362	1191
ENSDARG00000001891	ENSDART00000045840	20	2	2	TGCCACATCCAATGTGCCGTATTT	6	-	319	1191
ENSDARG00000001891	ENSDART00000045840	20	2	2	GAATGCCACATCCAATGTGCCGTA	6	-	322	1191
ENSDARG00000001891	ENSDART00000045840	20	2	2	CTCTGCTTCTTGGTGGGCAGTAGAA	7	-	449	1191
ENSDARG00000001891	ENSDART00000045840	20	2	2	CCCTGCAGATTGAGTTTGGTTAA	5	-	637	1191
ENSDARG00000001891	ENSDART00000045840	20	3	3	ACAGTCTTCCTGTGGTGGAGTTGTA	7	-	805	1191
ENSDARG00000001891	ENSDART00000045840	20	3	3	ACAGTCTTCCTGTGGTGGAGTTG	5	-	807	1191
ENSDARG00000001891	ENSDART00000045840	20	3	3	AGAAGCTCCGGAATGGAGGATTC	5	-	769	1191
ENSDARG00000001891	ENSDART00000045840	20	4	4	GAAGACAAATGTCTCTTTGTAGGT	6	-	976	1191
ENSDARG00000001891	ENSDART00000045840	20	4	4	GTACACAGATACCTGGAGGGTGAC	6	-	1027	1191
ENSDARG00000001891	ENSDART00000045840	20	4	4	AGCTTCACATAAGTGTCTGATGGA	6	-	879	1191
ENSDARG00000001891	ENSDART00000045840	20	4	4	GACATCTCCTTCCCTTTGGAGTC	5	-	913	1191
ENSDARG00000001891	ENSDART00000104513	20	1	1	TTCTCCATCCACTCCTCTGCTGAT	6	-	92	1374
ENSDARG00000001891	ENSDART00000104513	20	1	1	TCCATCCACTCCTCTGCTGATGAG	6	-	89	1374
ENSDARG00000001891	ENSDART00000104513	20	1	1	GTTTACCCAGCTCAGCCGAGGCC	5	-	150	1374
ENSDARG00000001891	ENSDART00000104513	20	2	2	GGCCCAAAACAGCAGTGCTGTCGCT	7	-	361	1374
ENSDARG00000001891	ENSDART00000104513	20	2	2	CCCAAAACAGCAGTGCTGTCGCT	5	-	361	1374
ENSDARG00000001891	ENSDART00000104513	20	2	2	CACTTCCACTACCCTCTGCAGAG	5	-	264	1374
ENSDARG00000001891	ENSDART00000104513	20	2	2	CAAAACAGCAGTGCTGTCGCTGGG	6	-	358	1374
ENSDARG00000001891	ENSDART00000104513	20	2	2	GCCCAAAACAGCAGTGCTGTCGCT	6	-	361	1374
ENSDARG00000001891	ENSDART00000104513	20	3	3	GTCACCGTCACCGCAAGCCGTTGCT	7	-	485	1374
ENSDARG00000001891	ENSDART00000104513	20	3	3	GCCCTCTGCTTCTTGGTGGGCAGTA	7	-	575	1374
ENSDARG00000001891	ENSDART00000104513	20	3	3	TGCCACATCCAATGTGCCGTATTT	6	-	442	1374
ENSDARG00000001891	ENSDART00000104513	20	3	3	CCCTGCAGATTGAGTTTGGTTAA	5	-	760	1374
ENSDARG00000001891	ENSDART00000104513	20	3	3	GAATGCCACATCCAATGTGCCGTA	6	-	445	1374
ENSDARG00000001891	ENSDART00000104513	20	3	3	CTCTGCTTCTTGGTGGGCAGTAGAA	7	-	572	1374
ENSDARG00000001891	ENSDART00000104513	20	4	4	ACAGTCTTCCTGTGGTGGAGTTGTA	7	-	928	1374
ENSDARG00000001891	ENSDART00000104513	20	4	4	ACAGTCTTCCTGTGGTGGAGTTG	5	-	930	1374
ENSDARG00000001891	ENSDART00000104513	20	4	4	AGAAGCTCCGGAATGGAGGATTC	5	-	892	1374
ENSDARG00000001891	ENSDART00000104513	20	5	5	GTTGCCCACTAATGAAGTGTTTTAC	7	-	1030	1374
ENSDARG00000001891	ENSDART00000104513	20	6	6	GACATCTCCTTCCCTTTGGAGTC	5	-	1096	1374
ENSDARG00000001891	ENSDART00000104513	20	6	6	AGCTTCACATAAGTGTCTGATGGA	6	-	1062	1374
ENSDARG00000001891	ENSDART00000104513	20	6	6	GTACACAGATACCTGGAGGGTGAC	6	-	1210	1374
ENSDARG00000001891	ENSDART00000104513	20	6	6	GAAGACAAATGTCTCTTTGTAGGT	6	-	1159	1374
ENSDARG00000002129	ENSDART00000040380	20	1	1	TTACTAGGCACTCATGGGGGAAC	5	-	2	1983
ENSDARG00000002129	ENSDART00000040380	20	2	2	GACAAAAAAAAAAAGCTGATGAA	5	-	13	1983
ENSDARG00000002129	ENSDART00000040380	20	3	3	GTCTGCTGCATTGTTGATGGTGAC	6	-	64	1983
ENSDARG00000002129	ENSDART00000040380	20	5	5	CAATTCCACTCGCAGCTGCTGTT	5	-	270	1983
ENSDARG00000002129	ENSDART00000040380	20	7	7	CCCTCCAAATCTTTTCTTGAGAT	5	-	395	1983
ENSDARG00000002129	ENSDART00000040380	20	9	9	GACAAAGGCTCCAGCGATGATAAC	6	-	631	1983
ENSDARG00000002129	ENSDART00000040380	20	10	10	AAAGGCATCCTCTCGTGGCATGT	5	-	779	1983
ENSDARG00000002129	ENSDART00000040380	20	12	12	GAAACCACCAGTTTTGGATAGGCA	6	-	1104	1983
ENSDARG00000002129	ENSDART00000040380	20	13	13	AGCTCCTTATCCCTAGCTTGAGGC	6	-	1254	1983
ENSDARG00000002129	ENSDART00000040380	20	14	14	GAAGACTGCTGCTATAGGAGGGGCT	7	-	1401	1983
ENSDARG00000002129	ENSDART00000040380	20	15	15	GACTCCACATATGACTTTTGGGCA	6	-	1561	1983
ENSDARG00000002129	ENSDART00000040380	20	18	18	ATCTTCATCATGATGGATTGTTC	5	-	1792	1983
ENSDARG00000002129	ENSDART00000040380	20	18	18	AAATTCTTCCAAAGTGGGTTTTC	5	-	1909	1983
ENSDARG00000002129	ENSDART00000040380	20	18	18	TTCCTCTTCTGTAGGCTCTGGAGCT	7	-	1848	1983
ENSDARG00000002129	ENSDART00000104305	20	1	1	GTCTGCTGCATTGTTGATGGTGAC	6	-	34	1986
ENSDARG00000002129	ENSDART00000104305	20	3	3	CAATTCCACTCGCAGCTGCTGTT	5	-	240	1986
ENSDARG00000002129	ENSDART00000104305	20	5	5	CCCTCCAAATCTTTTCTTGAGAT	5	-	365	1986
ENSDARG00000002129	ENSDART00000104305	20	7	7	GACAAAGGCTCCAGCGATGATAAC	6	-	601	1986
ENSDARG00000002129	ENSDART00000104305	20	8	8	AAAGGCATCCTCTCGTGGCATGT	5	-	749	1986
ENSDARG00000002129	ENSDART00000104305	20	10	10	GAAACCACCAGTTTTGGATAGGCA	6	-	1074	1986
ENSDARG00000002129	ENSDART00000104305	20	11	11	AGCTCCTTATCCCTAGCTTGAGGC	6	-	1224	1986
ENSDARG00000002129	ENSDART00000104305	20	12	12	GAAGACTGCTGCTATAGGAGGGGCT	7	-	1371	1986
ENSDARG00000002129	ENSDART00000104305	20	13	13	GACTCCACATATGACTTTTGGGCA	6	-	1531	1986
ENSDARG00000002129	ENSDART00000104305	20	14	14	GCCCTCCTCTTTTCATCTGCCTCT	6	-	1740	1986
ENSDARG00000002129	ENSDART00000104305	20	15	15	ATCTTCATCATGATGGATTGTTC	5	-	1795	1986
ENSDARG00000002129	ENSDART00000104305	20	15	15	AAATTCTTCCAAAGTGGGTTTTC	5	-	1912	1986
ENSDARG00000002129	ENSDART00000104305	20	15	15	TTCCTCTTCTGTAGGCTCTGGAGCT	7	-	1851	1986
ENSDARG00000002333	ENSDART00000020183	20	1	1	TCCGACTGCTCGACGGCGGATTCT	6	+	104	1101
ENSDARG00000002333	ENSDART00000020183	20	1	1	TCCGACTGCTCGACGGCGGATTC	5	+	104	1101
ENSDARG00000002333	ENSDART00000020183	20	4	4	GCACCACACGCAGGTGTCTGTTGGA	7	+	341	1101
ENSDARG00000002333	ENSDART00000020183	20	6	6	GTCAACTGCCACCGTAATAGGCA	5	+	465	1101
ENSDARG00000002333	ENSDART00000020183	20	7	7	GTTCTCTGCCTGATGAGCTGGGGCT	7	+	581	1101
ENSDARG00000002333	ENSDART00000020183	20	8	8	GCCCCCTACTGCCCCGGGAGTCTGC	7	+	792	1101
ENSDARG00000002333	ENSDART00000020183	20	10	10	ACCATCTTCCTGCCAGGTGAGTCT	6	+	1055	1101
ENSDARG00000002333	ENSDART00000102058	20	1	1	TCCGACTGCTCGACGGCGGATTCT	6	+	104	1101
ENSDARG00000002333	ENSDART00000102058	20	1	1	TCCGACTGCTCGACGGCGGATTC	5	+	104	1101
ENSDARG00000002333	ENSDART00000102058	20	4	4	GCACCACACGCAGGTGTCTGTTGGA	7	+	341	1101
ENSDARG00000002333	ENSDART00000102058	20	6	6	GTCAACTGCCACCGTAATAGGCA	5	+	465	1101
ENSDARG00000002333	ENSDART00000102058	20	7	7	GTTCTCTGCCTGATGAGCTGGGGCT	7	+	581	1101
ENSDARG00000002333	ENSDART00000102058	20	8	8	GCCCCCTACTGCCCCGGGAGTCTGC	7	+	792	1101
ENSDARG00000002333	ENSDART00000102058	20	11	11	ACCATCTTCCTGCCAGGTGAGTCT	6	+	1055	1101
ENSDARG00000002411	ENSDART00000023820	20	6	6	GCACTAACCCTCAATCTGCCTGT	5	+	401	2061
ENSDARG00000002411	ENSDART00000023820	20	9	9	TGCATCCCACGGTTTGGTGTCAAC	6	+	766	2061
ENSDARG00000002411	ENSDART00000023820	20	9	9	ACATGCATCCCACGGTTTGGTGT	5	+	763	2061
ENSDARG00000002411	ENSDART00000023820	20	9	9	ACATGCATCCCACGGTTTGGTGTC	6	+	763	2061
ENSDARG00000002411	ENSDART00000023820	20	9	9	GCATCCCACGGTTTGGTGTCAAC	5	+	767	2061
ENSDARG00000002411	ENSDART00000023820	20	9	9	GTCGGCAGCATGTAAGGAGGAGAA	6	+	672	2061
ENSDARG00000002411	ENSDART00000023820	20	10	10	ATCGGCCACTCACAGTGATGATGTA	7	+	878	2061
ENSDARG00000002411	ENSDART00000023820	20	11	11	CTCCACACCTGCCCTAGAGGTCTAC	7	+	1062	2061
ENSDARG00000002411	ENSDART00000023820	20	11	11	AACATCCACGCAGCAGATGTTGTT	6	+	1018	2061
ENSDARG00000002411	ENSDART00000023820	20	11	11	AACAACATCCACGCAGCAGATGTT	6	+	1015	2061
ENSDARG00000002411	ENSDART00000023820	20	13	13	AGAATCATCATTTGGCGGTGGGC	5	+	1223	2061
ENSDARG00000002411	ENSDART00000104292	20	1	1	CAAAACCGCCGAAGCATCTTTGGAG	7	+	38	477
ENSDARG00000002411	ENSDART00000104292	20	1	1	AAAACCGCCGAAGCATCTTTGGAG	6	+	39	477
ENSDARG00000002467	ENSDART00000025330	20	1	1	TTCCGCGCATCAGAGCCGGGGGG	5	-	144	1002
ENSDARG00000002467	ENSDART00000025330	20	1	1	GTCGCCTTCCCGATGCCGCAGTT	5	-	190	1002
ENSDARG00000002467	ENSDART00000025330	20	1	1	GCCGACATCAGTGCAGGAGTTGCG	6	-	27	1002
ENSDARG00000002467	ENSDART00000025330	20	1	1	TTCAGCAGCTCCGCCGCGGTCGCC	6	-	207	1002
ENSDARG00000002467	ENSDART00000025330	20	1	1	CGCGTCCTCCGCCCTCTGCCTGT	5	-	263	1002
ENSDARG00000002467	ENSDART00000025330	20	1	1	CGCATCAGAGCCGGGGGGTAGCT	5	-	139	1002
ENSDARG00000002467	ENSDART00000025330	20	1	1	AGCTTCAGCAGCTCCGCCGCGGTC	6	-	210	1002
ENSDARG00000002467	ENSDART00000025330	20	1	1	AGCGGCTAAAACCACCGCTGCCGAC	7	-	45	1002
ENSDARG00000002467	ENSDART00000025330	20	1	1	AGCAGCTCCGCCGCGGTCGCCTTC	6	-	204	1002
ENSDARG00000002467	ENSDART00000025330	20	2	2	CACGACGACGCGGCTGGGAGACGAC	7	-	546	1002
ENSDARG00000002467	ENSDART00000025330	20	2	2	AGACCAGCCAAAAAAGAGGCTTAA	6	-	794	1002
ENSDARG00000002467	ENSDART00000025330	20	2	2	CTCCCATACTTGTAGAGTTTGGA	5	-	577	1002
ENSDARG00000002467	ENSDART00000025330	20	2	2	TTAATCAGCAGGGGGATGTTGAC	5	-	775	1002
ENSDARG00000002467	ENSDART00000025330	20	2	2	AGAGGCTTAATCAGCAGGGGGATGT	7	-	779	1002
ENSDARG00000002467	ENSDART00000025330	20	2	2	AGCACCCTCCAGTGGGCTTTTAA	5	-	830	1002
ENSDARG00000002467	ENSDART00000025330	20	2	2	GACCACGACGACGCGGCTGGGAG	5	-	551	1002
ENSDARG00000002622	ENSDART00000019409	20	1	1	CTAAGCAGCAGGCAGCGTCGAGGCC	7	+	67	888
ENSDARG00000002622	ENSDART00000019409	20	3	3	GTCAAACCAATCCAGCAGCATTG	5	+	741	888
ENSDARG00000002622	ENSDART00000019409	20	3	3	GCAGACCTCAAACAGCCTTTGTT	5	+	595	888
ENSDARG00000002622	ENSDART00000019409	20	3	3	GACCTCAAACAGCCTTTGTTGTC	5	+	598	888
ENSDARG00000002622	ENSDART00000019409	20	3	3	CAAGCCAGACCATTAGCTTTGGAC	6	+	854	888
ENSDARG00000002622	ENSDART00000019409	20	3	3	AGCTGCAGACACCATTTGAAGCC	5	+	485	888
ENSDARG00000002622	ENSDART00000019409	20	3	3	ACCATCAGAAGTTCAGGTTGTCTCT	7	+	822	888
ENSDARG00000002622	ENSDART00000019409	20	3	3	ACACAAGCCAGACCATTAGCTTTG	6	+	851	888
ENSDARG00000002622	ENSDART00000019409	20	3	3	AAACCAATCCAGCAGCATTGAAC	5	+	744	888
ENSDARG00000002653	ENSDART00000023432	20	1	1	AACTACGACAGTCCTGCGGCCGCT	6	+	85	360
ENSDARG00000002653	ENSDART00000023432	20	2	2	GGCTCCAAACTGCCTGCGCTGCC	5	+	243	360
ENSDARG00000002656	ENSDART00000026719	20	1	1	AGAGCCGACAGCCTTCTGGAGGT	5	+	140	1413
ENSDARG00000002656	ENSDART00000026719	20	1	1	GCCGACAGCCTTCTGGAGGTCTGT	6	+	143	1413
ENSDARG00000002656	ENSDART00000026719	20	4	4	GGCCTCACACCTAGTCTGTGGGTTG	7	+	397	1413
ENSDARG00000002656	ENSDART00000026719	20	4	4	GGCCTCACACCTAGTCTGTGGGT	5	+	397	1413
ENSDARG00000002656	ENSDART00000026719	20	4	4	GCCTCACACCTAGTCTGTGGGTTG	6	+	398	1413
ENSDARG00000002656	ENSDART00000026719	20	4	4	ACACACGCAAGGCAGATGGTGGC	5	+	377	1413
ENSDARG00000002656	ENSDART00000026719	20	5	5	CTATTCTTCCCTCTCCTTTTGAGCC	7	+	575	1413
ENSDARG00000002656	ENSDART00000026719	20	5	5	CAATGCCCCAGCCAATGGGGAGGAA	7	+	612	1413
ENSDARG00000002656	ENSDART00000026719	20	5	5	CAATGCCCCAGCCAATGGGGAGGA	6	+	612	1413
ENSDARG00000002656	ENSDART00000026719	20	6	6	GTTTCAGTCTGCCAGGATTGAGAC	6	+	878	1413
ENSDARG00000002656	ENSDART00000026719	20	7	7	GTTTACTCCAGTGGAGACGCCGGA	6	+	1068	1413
ENSDARG00000002656	ENSDART00000026719	20	8	8	GGCAGCATCAGGCATCGTGGGGGAC	7	+	1245	1413
ENSDARG00000002656	ENSDART00000026719	20	8	8	AGAAACTAAGCGAGGTGGAAGAG	5	+	1307	1413
ENSDARG00000002656	ENSDART00000101759	20	3	3	ATCCACATCGTGAATGTGGAGTC	5	+	253	3225
ENSDARG00000002656	ENSDART00000101759	20	3	3	ACATCCACATCGTGAATGTGGAGTC	7	+	251	3225
ENSDARG00000002656	ENSDART00000101759	20	5	5	AGCTCATAATAGGATTTGAGTCT	5	+	386	3225
ENSDARG00000002656	ENSDART00000101759	20	6	6	ACAATCACACCACACGGTTAGTTT	6	+	580	3225
ENSDARG00000002656	ENSDART00000101759	20	6	6	CAATCACACCACACGGTTAGTTT	5	+	581	3225
ENSDARG00000002656	ENSDART00000101759	20	14	14	GAAAACAGCAAAGGTGTTTGAGAA	6	+	1188	3225
ENSDARG00000002656	ENSDART00000101759	20	14	14	CCCAGCACAGAGATTGTGGATGAA	6	+	1234	3225
ENSDARG00000002656	ENSDART00000101759	20	15	15	AGAGTCTCCAGAAGGGGGAGGAG	5	+	1425	3225
ENSDARG00000002656	ENSDART00000101759	20	16	16	AACTCCTGCTATGGCTTGTGAGTCT	7	+	1681	3225
ENSDARG00000002656	ENSDART00000101759	20	17	17	AGAGCCGACAGCCTTCTGGAGGT	5	+	1829	3225
ENSDARG00000002656	ENSDART00000101759	20	17	17	GCCGACAGCCTTCTGGAGGTCTGT	6	+	1832	3225
ENSDARG00000002656	ENSDART00000101759	20	26	26	GGCCTCACACCTAGTCTGTGGGTTG	7	+	2209	3225
ENSDARG00000002656	ENSDART00000101759	20	26	26	GGCCTCACACCTAGTCTGTGGGT	5	+	2209	3225
ENSDARG00000002656	ENSDART00000101759	20	26	26	GCCTCACACCTAGTCTGTGGGTTG	6	+	2210	3225
ENSDARG00000002656	ENSDART00000101759	20	26	26	ACACACGCAAGGCAGATGGTGGC	5	+	2189	3225
ENSDARG00000002656	ENSDART00000101759	20	27	27	CTATTCTTCCCTCTCCTTTTGAGCC	7	+	2387	3225
ENSDARG00000002656	ENSDART00000101759	20	27	27	CAATGCCCCAGCCAATGGGGAGGAA	7	+	2424	3225
ENSDARG00000002656	ENSDART00000101759	20	27	27	CAATGCCCCAGCCAATGGGGAGGA	6	+	2424	3225
ENSDARG00000002656	ENSDART00000101759	20	28	28	GTTTCAGTCTGCCAGGATTGAGAC	6	+	2690	3225
ENSDARG00000002656	ENSDART00000101759	20	29	29	GTTTACTCCAGTGGAGACGCCGGA	6	+	2880	3225
ENSDARG00000002656	ENSDART00000101759	20	30	30	AGAAACTAAGCGAGGTGGAAGAG	5	+	3119	3225
ENSDARG00000002656	ENSDART00000101759	20	30	30	GGCAGCATCAGGCATCGTGGGGGAC	7	+	3057	3225
ENSDARG00000002656	ENSDART00000101760	20	3	3	ATCCACATCGTGAATGTGGAGTC	5	+	262	3288
ENSDARG00000002656	ENSDART00000101760	20	3	3	ACATCCACATCGTGAATGTGGAGTC	7	+	260	3288
ENSDARG00000002656	ENSDART00000101760	20	5	5	AGCTCATAATAGGATTTGAGTCT	5	+	395	3288
ENSDARG00000002656	ENSDART00000101760	20	6	6	CAATCACACCACACGGTTAGTTT	5	+	590	3288
ENSDARG00000002656	ENSDART00000101760	20	6	6	ACAATCACACCACACGGTTAGTTT	6	+	589	3288
ENSDARG00000002656	ENSDART00000101760	20	13	13	CCCAGCACAGAGATTGTGGATGAA	6	+	1240	3288
ENSDARG00000002656	ENSDART00000101760	20	13	13	GAAAACAGCAAAGGTGTTTGAGAA	6	+	1194	3288
ENSDARG00000002656	ENSDART00000101760	20	14	14	AGAGTCTCCAGAAGGGGGAGGAG	5	+	1428	3288
ENSDARG00000002656	ENSDART00000101760	20	15	15	AACTCCTGCTATGGCTTGTGAGTCT	7	+	1684	3288
ENSDARG00000002656	ENSDART00000101760	20	16	16	AGAGCCGACAGCCTTCTGGAGGT	5	+	1832	3288
ENSDARG00000002656	ENSDART00000101760	20	16	16	GCCGACAGCCTTCTGGAGGTCTGT	6	+	1835	3288
ENSDARG00000002656	ENSDART00000101760	20	21	21	GGCCTCACACCTAGTCTGTGGGTTG	7	+	2272	3288
ENSDARG00000002656	ENSDART00000101760	20	21	21	GGCCTCACACCTAGTCTGTGGGT	5	+	2272	3288
ENSDARG00000002656	ENSDART00000101760	20	21	21	GCCTCACACCTAGTCTGTGGGTTG	6	+	2273	3288
ENSDARG00000002656	ENSDART00000101760	20	21	21	ACACACGCAAGGCAGATGGTGGC	5	+	2252	3288
ENSDARG00000002656	ENSDART00000101760	20	22	22	CTATTCTTCCCTCTCCTTTTGAGCC	7	+	2450	3288
ENSDARG00000002656	ENSDART00000101760	20	22	22	CAATGCCCCAGCCAATGGGGAGGAA	7	+	2487	3288
ENSDARG00000002656	ENSDART00000101760	20	22	22	CAATGCCCCAGCCAATGGGGAGGA	6	+	2487	3288
ENSDARG00000002656	ENSDART00000101760	20	23	23	GTTTCAGTCTGCCAGGATTGAGAC	6	+	2753	3288
ENSDARG00000002656	ENSDART00000101760	20	24	24	GTTTACTCCAGTGGAGACGCCGGA	6	+	2943	3288
ENSDARG00000002656	ENSDART00000101760	20	25	25	AGAAACTAAGCGAGGTGGAAGAG	5	+	3182	3288
ENSDARG00000002656	ENSDART00000101760	20	25	25	GGCAGCATCAGGCATCGTGGGGGAC	7	+	3120	3288
ENSDARG00000002656	ENSDART00000101762	20	5	5	ATCCACATCGTGAATGTGGAGTC	5	+	493	3447
ENSDARG00000002656	ENSDART00000101762	20	5	5	ACATCCACATCGTGAATGTGGAGTC	7	+	491	3447
ENSDARG00000002656	ENSDART00000101762	20	7	7	AGCTCATAATAGGATTTGAGTCT	5	+	626	3447
ENSDARG00000002656	ENSDART00000101762	20	8	8	CAATCACACCACACGGTTAGTTT	5	+	821	3447
ENSDARG00000002656	ENSDART00000101762	20	8	8	ACAATCACACCACACGGTTAGTTT	6	+	820	3447
ENSDARG00000002656	ENSDART00000101762	20	15	15	CCCAGCACAGAGATTGTGGATGAA	6	+	1471	3447
ENSDARG00000002656	ENSDART00000101762	20	15	15	GAAAACAGCAAAGGTGTTTGAGAA	6	+	1425	3447
ENSDARG00000002656	ENSDART00000101762	20	16	16	AGAGTCTCCAGAAGGGGGAGGAG	5	+	1659	3447
ENSDARG00000002656	ENSDART00000101762	20	17	17	AACTCCTGCTATGGCTTGTGAGTCT	7	+	1915	3447
ENSDARG00000002656	ENSDART00000101762	20	18	18	AGAGCCGACAGCCTTCTGGAGGT	5	+	2063	3447
ENSDARG00000002656	ENSDART00000101762	20	18	18	GCCGACAGCCTTCTGGAGGTCTGT	6	+	2066	3447
ENSDARG00000002656	ENSDART00000101762	20	21	21	ACACCCAAATGTATGTGTTAGGGA	6	+	2181	3447
ENSDARG00000002656	ENSDART00000101762	20	23	23	GGCCTCACACCTAGTCTGTGGGTTG	7	+	2431	3447
ENSDARG00000002656	ENSDART00000101762	20	23	23	GGCCTCACACCTAGTCTGTGGGT	5	+	2431	3447
ENSDARG00000002656	ENSDART00000101762	20	23	23	GCCTCACACCTAGTCTGTGGGTTG	6	+	2432	3447
ENSDARG00000002656	ENSDART00000101762	20	23	23	ACACACGCAAGGCAGATGGTGGC	5	+	2411	3447
ENSDARG00000002656	ENSDART00000101762	20	24	24	CTATTCTTCCCTCTCCTTTTGAGCC	7	+	2609	3447
ENSDARG00000002656	ENSDART00000101762	20	24	24	CAATGCCCCAGCCAATGGGGAGGAA	7	+	2646	3447
ENSDARG00000002656	ENSDART00000101762	20	24	24	CAATGCCCCAGCCAATGGGGAGGA	6	+	2646	3447
ENSDARG00000002656	ENSDART00000101762	20	25	25	GTTTCAGTCTGCCAGGATTGAGAC	6	+	2912	3447
ENSDARG00000002656	ENSDART00000101762	20	26	26	GTTTACTCCAGTGGAGACGCCGGA	6	+	3102	3447
ENSDARG00000002656	ENSDART00000101762	20	27	27	AGAAACTAAGCGAGGTGGAAGAG	5	+	3341	3447
ENSDARG00000002656	ENSDART00000101762	20	27	27	GGCAGCATCAGGCATCGTGGGGGAC	7	+	3279	3447
ENSDARG00000002745	ENSDART00000025509	20	2	1	GGCCCCTGCATGTGGATGCCAAC	5	+	57	1125
ENSDARG00000002745	ENSDART00000025509	20	5	4	CTCTTCTAAGTGCTGTCGGAGAA	5	+	404	1125
ENSDARG00000002745	ENSDART00000025509	20	6	5	TGCCTAGCACCATTGGTGCCTTT	5	+	515	1125
ENSDARG00000002745	ENSDART00000025509	20	6	5	TCCCACTCCTGACCTCTGTGTGC	5	+	558	1125
ENSDARG00000002745	ENSDART00000025509	20	6	5	ATCCCACTCCTGACCTCTGTGTGC	6	+	557	1125
ENSDARG00000002745	ENSDART00000025509	20	7	6	TACCCCGGCATCATTTCTGCAGAC	6	+	679	1125
ENSDARG00000002745	ENSDART00000025509	20	7	6	AGACTCACAGCCTGGCGGTGGCA	5	+	699	1125
ENSDARG00000002745	ENSDART00000025509	20	9	8	CACCAACGCTCGTAATGACTGGGGC	7	+	1026	1125
ENSDARG00000002754	ENSDART00000003346	20	2	2	GTCTACTGCCCTCTTGCGGCGTCT	6	+	190	1080
ENSDARG00000002754	ENSDART00000003346	20	2	2	GTCTACTGCCCTCTTGCGGCGTC	5	+	190	1080
ENSDARG00000002754	ENSDART00000003346	20	2	2	AGAACCATCAATGTCTTTGCCTGC	6	+	223	1080
ENSDARG00000002754	ENSDART00000003346	20	3	3	GCAAGCTTCAGGAGCTCTGCATTG	6	+	488	1080
ENSDARG00000002754	ENSDART00000003346	20	3	3	CACAAAACCACACAGTGTGCAGAA	6	+	343	1080
ENSDARG00000002754	ENSDART00000003346	20	3	3	TCCTCAATCAGACAATGTGCCTGT	6	+	537	1080
ENSDARG00000002780	ENSDART00000021692	20	1	1	AGAAAACACCATCATCTGCTGAA	5	+	89	1197
ENSDARG00000002780	ENSDART00000021692	20	2	2	ACAATCCTCAAACTGTGTGCTGAG	6	+	168	1197
ENSDARG00000002780	ENSDART00000021692	20	2	2	ATCCTCAAACTGTGTGCTGAGAG	5	+	171	1197
ENSDARG00000002780	ENSDART00000021692	20	3	3	ATCCTCAAACTGTGTGCTGAGAG	5	+	345	1197
ENSDARG00000002780	ENSDART00000021692	20	3	3	ACAATCCTCAAACTGTGTGCTGAG	6	+	342	1197
ENSDARG00000002780	ENSDART00000021692	20	6	6	ACACTCAACTCATTCTGTCTGAGGA	7	+	719	1197
ENSDARG00000002780	ENSDART00000021692	20	6	6	AACTCATTCTGTCTGAGGAGAAC	5	+	725	1197
ENSDARG00000002826	ENSDART00000048537	20	2	2	TTATCAGACAGTTCCTGATGCTGGA	7	+	180	1482
ENSDARG00000002826	ENSDART00000048537	20	3	3	CTACTCGACACCAGGAAGATGTT	5	+	308	1482
ENSDARG00000002826	ENSDART00000048537	20	3	3	AAACACTGCAGGAGAAGATGCGGCG	7	+	230	1482
ENSDARG00000002826	ENSDART00000048537	20	5	5	CAATACACAGTCTGTGGCTGAGGT	6	+	606	1482
ENSDARG00000002826	ENSDART00000048537	20	5	5	CAATACACAGTCTGTGGCTGAGGTA	7	+	606	1482
ENSDARG00000002826	ENSDART00000048537	20	5	5	CACCAATACACAGTCTGTGGCTGAG	7	+	603	1482
ENSDARG00000002826	ENSDART00000048537	20	8	8	TACAGCAAAGGTGGAGGCAGTCTCT	7	+	807	1482
ENSDARG00000002826	ENSDART00000048537	20	8	8	GTCCCCTACAGCAAAGGTGGAGGC	6	+	801	1482
ENSDARG00000002826	ENSDART00000048537	20	8	8	GTCCCCTACAGCAAAGGTGGAGGCA	7	+	801	1482
ENSDARG00000002826	ENSDART00000048537	20	8	8	CTAAACGCCTCCCTTTTGTGGCT	5	+	842	1482
ENSDARG00000002826	ENSDART00000048537	20	8	8	AAACGCCTCCCTTTTGTGGCTGGA	6	+	844	1482
ENSDARG00000002826	ENSDART00000048537	20	8	8	AACGCCTCCCTTTTGTGGCTGGA	5	+	845	1482
ENSDARG00000002826	ENSDART00000048537	20	8	8	AACGCCTCCCTTTTGTGGCTGGAAC	7	+	845	1482
ENSDARG00000002826	ENSDART00000048537	20	8	8	CCCTACAGCAAAGGTGGAGGCAGTC	7	+	804	1482
ENSDARG00000002826	ENSDART00000048537	20	9	9	TGCTTCCACACTGGGCAGCCTCT	5	+	1032	1482
ENSDARG00000002826	ENSDART00000048537	20	11	11	GCCCTAGACAGAAGCAGCAGAGGCC	7	+	1274	1482
ENSDARG00000002847	ENSDART00000014163	20	1	1	CAACACTCCTTCCTCTGAGTTTGAT	7	+	108	1005
ENSDARG00000002847	ENSDART00000014163	20	1	1	CACTCCTTCCTCTGAGTTTGATGT	6	+	111	1005
ENSDARG00000002847	ENSDART00000014163	20	1	1	CACTCCTTCCTCTGAGTTTGATGTC	7	+	111	1005
ENSDARG00000002847	ENSDART00000014163	20	2	2	AAACAAGCCCCACAATGTGACTGT	6	+	297	1005
ENSDARG00000002847	ENSDART00000014163	20	2	2	ACAGTCTTCCAATCAGAAGCAGCC	6	+	267	1005
ENSDARG00000002847	ENSDART00000014163	20	3	3	GAACACACCTCCCTGTTGAAAAC	5	+	464	1005
ENSDARG00000002847	ENSDART00000014163	20	4	4	TACGTCACAGAGTCAGGTGAGTCT	6	+	568	1005
ENSDARG00000002847	ENSDART00000014163	20	6	6	CAAGCCCACAGTTCTTGCAGAGGCA	7	+	655	1005
ENSDARG00000002847	ENSDART00000014163	20	7	7	GCCTACAGCTCAAGGTAAGACTAC	6	+	885	1005
ENSDARG00000002877	ENSDART00000019744	20	1	1	CTCTTCCTCTCCTGCGATGTGGAC	6	+	58	2373
ENSDARG00000002877	ENSDART00000019744	20	1	1	TTCCTCTCCTGCGATGTGGACAAC	6	+	61	2373
ENSDARG00000002877	ENSDART00000019744	20	1	1	GAACTCTTCCTCTCCTGCGATGTG	6	+	55	2373
ENSDARG00000002877	ENSDART00000019744	20	3	3	TACCCCTTCCTCGCTTTGTGATGGG	7	+	299	2373
ENSDARG00000002877	ENSDART00000019744	20	3	3	CTCCCCAGACCTCCGGGCCGAGTGC	7	+	388	2373
ENSDARG00000002877	ENSDART00000019744	20	3	3	TCCCCAGACCTCCGGGCCGAGTGC	6	+	389	2373
ENSDARG00000002877	ENSDART00000019744	20	4	4	GACACCACATCTCCTGTAGTGTCT	6	+	478	2373
ENSDARG00000002877	ENSDART00000019744	20	4	4	GCAGCCCTCTGTGCCAGGAGTTGTT	7	+	579	2373
ENSDARG00000002877	ENSDART00000019744	20	4	4	ACAAGCGACAGGCCAGTGGTGGAA	6	+	545	2373
ENSDARG00000002877	ENSDART00000019744	20	8	8	TGCCAAAGCTTATTGACTTGGAT	5	+	1106	2373
ENSDARG00000002877	ENSDART00000019744	20	9	9	CCCTCAACCAGAATTGGCCTGAGCT	7	+	1220	2373
ENSDARG00000002877	ENSDART00000019744	20	9	9	AGAACCTGCTCCTGAGGTGGGCTTC	7	+	1146	2373
ENSDARG00000002877	ENSDART00000019744	20	9	9	ACCTGCTCCTGAGGTGGGCTTCT	5	+	1149	2373
ENSDARG00000002877	ENSDART00000019744	20	10	10	CTCTCCAGCAGTGGGAGACTTTTAG	7	+	1253	2373
ENSDARG00000002877	ENSDART00000019744	20	11	11	AGCTCAAGAGAACTGGAAGTGGTG	6	+	1409	2373
ENSDARG00000002877	ENSDART00000019744	20	12	12	AAACCCCCAGAACTGTCTGATGAG	6	+	1462	2373
ENSDARG00000002877	ENSDART00000019744	20	12	12	AAAACCCCCAGAACTGTCTGATGAG	7	+	1461	2373
ENSDARG00000002877	ENSDART00000019744	20	14	14	GTCTCCAGAAGGACTGAAGGTTGT	6	+	1617	2373
ENSDARG00000002877	ENSDART00000019744	20	15	15	GTTCCCAGCAGGCAGGAGTAGTG	5	+	1733	2373
ENSDARG00000002877	ENSDART00000019744	20	15	15	TTCCCAGCAGGCAGGAGTAGTGGCC	7	+	1734	2373
ENSDARG00000002877	ENSDART00000019744	20	16	16	AACAGCCCAACTTTGCTGACTTT	5	+	1880	2373
ENSDARG00000002877	ENSDART00000019744	20	17	17	AGAAGCTGCCGGGACGATGAGAAC	6	+	1986	2373
ENSDARG00000002877	ENSDART00000019744	20	18	18	CTCCTAAACCCGTCCGTCGAAGAC	6	+	2090	2373
ENSDARG00000002877	ENSDART00000019744	20	18	18	AGCTCAGACCAGATGTGGACGAC	5	+	2129	2373
ENSDARG00000002894	ENSDART00000019759	20	1	1	TTCCTCTTCCCCGATGCTGGTGTC	6	-	104	969
ENSDARG00000002894	ENSDART00000019759	20	1	1	GTTTTCCTCTTCCCCGATGCTGGT	6	-	107	969
ENSDARG00000002894	ENSDART00000019759	20	3	3	CTCATCAGAGAACCTGAATTGTGT	6	-	385	969
ENSDARG00000002894	ENSDART00000019759	20	5	5	ATCATCATCAGGAGGAATGGTTG	5	-	704	969
ENSDARG00000002894	ENSDART00000019759	20	6	6	TTCCTCTTCTGACAAAGCTGCTGAG	7	-	834	969
ENSDARG00000002977	ENSDART00000005604	20	4	4	CTCCACTTCCTCCTCTTTGTTGAC	6	-	334	831
ENSDARG00000002977	ENSDART00000005604	20	5	5	TCCTCATCCTTCTCCTTTTGCTTCT	7	-	820	831
ENSDARG00000002977	ENSDART00000005604	20	5	5	CTCTTCCCCTCCTTTGGCTTTTCT	6	-	744	831
ENSDARG00000002977	ENSDART00000005604	20	5	5	CTCCTCATCATCGTTCTGCTTCT	5	-	796	831
ENSDARG00000002991	ENSDART00000033436	20	4	3	TTCTTCTCCTGCAGCTGTAGGATGC	7	-	437	3492
ENSDARG00000002991	ENSDART00000033436	20	5	4	GTCATCAGCCACCTGAAGAAGGT	5	-	608	3492
ENSDARG00000002991	ENSDART00000033436	20	5	4	GCCACCAGAGGATGGGAGGAGTTC	6	-	538	3492
ENSDARG00000002991	ENSDART00000033436	20	5	4	GCCACCAGAGGATGGGAGGAGTT	5	-	539	3492
ENSDARG00000002991	ENSDART00000033436	20	8	7	GTCTTCTTCTTTTGCTGCAGGCTGT	7	-	893	3492
ENSDARG00000002991	ENSDART00000033436	20	9	8	CCCTCAAGCTCCCGCTGCTGACGCT	7	-	1073	3492
ENSDARG00000002991	ENSDART00000033436	20	9	8	AGCTCCCGCTGCTGACGCTGAATTG	7	-	1067	3492
ENSDARG00000002991	ENSDART00000033436	20	11	10	TCCCTCGGCCTACAGGAGTGGGG	5	-	1452	3492
ENSDARG00000002991	ENSDART00000033436	20	11	10	AAAGGCATCCAGACGCGATGGAGAG	7	-	1344	3492
ENSDARG00000002991	ENSDART00000033436	20	11	10	TCCCTCGGCCTACAGGAGTGGGGC	6	-	1451	3492
ENSDARG00000002991	ENSDART00000033436	20	11	10	GCCAGCTGCCTCTTCCTCTGGGGCT	7	-	1477	3492
ENSDARG00000002991	ENSDART00000033436	20	11	10	AAAACCATCTCCTTGTCTGAAAC	5	-	1273	3492
ENSDARG00000002991	ENSDART00000033436	20	13	12	ACACAAACCTTGAGTCTGTCTCT	5	-	1789	3492
ENSDARG00000002991	ENSDART00000033436	20	13	12	CTCTCAGCAGTAACTCTCTGGAGTT	7	-	1754	3492
ENSDARG00000002991	ENSDART00000033436	20	15	14	TTCCTCTACATTCTGGAGCAGCA	5	-	1976	3492
ENSDARG00000002991	ENSDART00000033436	20	15	14	GGCTTCCTCTACATTCTGGAGCA	5	-	1979	3492
ENSDARG00000002991	ENSDART00000033436	20	16	15	TCCATCTGCTCCTGCAGAAGCCTAA	7	-	2030	3492
ENSDARG00000002991	ENSDART00000033436	20	16	15	TGCTCCATCTGCTCCTGCAGAAGCC	7	-	2033	3492
ENSDARG00000002991	ENSDART00000033436	20	16	15	GTCTTCACAGATAATCTGTGCTGAA	7	-	2072	3492
ENSDARG00000002991	ENSDART00000033436	20	17	16	GTCTACAGCGTCCTGCAGAGTGT	5	-	2234	3492
ENSDARG00000002991	ENSDART00000033436	20	19	18	TGCTCAACACTGCCTGAAGCTGAC	6	-	2360	3492
ENSDARG00000002991	ENSDART00000033436	20	20	19	TGCCACCTCTGAGATGTAGGAGTG	6	-	2590	3492
ENSDARG00000002991	ENSDART00000033436	20	25	24	AGCTTCGCAGTGAAGAGAAGGATAA	7	-	3379	3492
ENSDARG00000002991	ENSDART00000103060	20	3	3	TTCTTCTCCTGCAGCTGTAGGATGC	7	-	431	1281
ENSDARG00000002991	ENSDART00000103060	20	4	4	GTCATCAGCCACCTGAAGAAGGT	5	-	602	1281
ENSDARG00000002991	ENSDART00000103060	20	4	4	GCCACCAGAGGATGGGAGGAGTTC	6	-	532	1281
ENSDARG00000002991	ENSDART00000103060	20	4	4	GCCACCAGAGGATGGGAGGAGTT	5	-	533	1281
ENSDARG00000002991	ENSDART00000103060	20	7	7	GTCTTCTTCTTTTGCTGCAGGCTGT	7	-	887	1281
ENSDARG00000002991	ENSDART00000103060	20	8	8	CCCTCAAGCTCCCGCTGCTGACGCT	7	-	1067	1281
ENSDARG00000002991	ENSDART00000103060	20	8	8	AGCTCCCGCTGCTGACGCTGAATTG	7	-	1061	1281
ENSDARG00000003058	ENSDART00000010494	20	1	1	TTATTCAAAACACCGCTGTTTTC	5	-	64	1542
ENSDARG00000003058	ENSDART00000010494	20	2	2	AACAGCTGCACGTAGCTCTGCCTGT	7	-	90	1542
ENSDARG00000003058	ENSDART00000010494	20	3	3	TACTCACCATCCTTTGTGTTGAGGG	7	-	185	1542
ENSDARG00000003058	ENSDART00000010494	20	3	3	TACTCACCATCCTTTGTGTTGAG	5	-	187	1542
ENSDARG00000003058	ENSDART00000010494	20	3	3	CTCACCATCCTTTGTGTTGAGGGA	6	-	184	1542
ENSDARG00000003058	ENSDART00000010494	20	3	3	CTCACCATCCTTTGTGTTGAGGG	5	-	185	1542
ENSDARG00000003058	ENSDART00000010494	20	4	4	GAAGTCTAAATTGAAGACTTGGAG	6	-	235	1542
ENSDARG00000003058	ENSDART00000010494	20	4	4	AAACACAGCAAGGGTGAAGTCTAA	6	-	250	1542
ENSDARG00000003058	ENSDART00000010494	20	5	5	TTCACCAGCTCTAGCAGGAGAGGGG	7	-	365	1542
ENSDARG00000003058	ENSDART00000010494	20	7	7	GGCTTCAGCAATCTGACGAGGCA	5	-	470	1542
ENSDARG00000003058	ENSDART00000010494	20	15	15	TCCTCCTGCGCTCTTTAGCTGTG	5	-	1229	1542
ENSDARG00000003069	ENSDART00000020710	20	2	2	CTCCTAGCAGTATGGGAAGTGGAA	6	+	815	3234
ENSDARG00000003069	ENSDART00000020710	20	2	2	GAACCCTACAGCGTGATTTGGCT	5	+	386	3234
ENSDARG00000003069	ENSDART00000020710	20	2	2	GAACCCTACAGCGTGATTTGGCTAC	7	+	386	3234
ENSDARG00000003069	ENSDART00000020710	20	2	2	GCAACCTGCTGCAACGACGCATTC	6	+	920	3234
ENSDARG00000003069	ENSDART00000020710	20	2	2	GTACGCCCAACTCCTTAGAAGCT	5	+	692	3234
ENSDARG00000003069	ENSDART00000020710	20	2	2	TGCACCACAGGGTTATGGCGGAGAG	7	+	105	3234
ENSDARG00000003069	ENSDART00000020710	20	2	2	AGCTCAGTCTGCAGGCGGGCTTG	5	+	347	3234
ENSDARG00000003069	ENSDART00000020710	20	2	2	AACGACGCATTCGCTCGGGTGAGGA	7	+	932	3234
ENSDARG00000003069	ENSDART00000020710	20	2	2	ACCTGCTCCTAGCAGTATGGGAA	5	+	810	3234
ENSDARG00000003069	ENSDART00000020710	20	4	4	AACACCAGCTCATCAAGAGGATGGC	7	+	1472	3234
ENSDARG00000003069	ENSDART00000020710	20	5	5	AGAACCTAACCTGTTAAGTGGTA	5	+	1503	3234
ENSDARG00000003069	ENSDART00000020710	20	6	6	TGCTGCCCACAGCAGAGGGAGGC	5	+	1703	3234
ENSDARG00000003069	ENSDART00000020710	20	6	6	ACATGCTGCCCACAGCAGAGGGA	5	+	1700	3234
ENSDARG00000003069	ENSDART00000020710	20	7	7	ATCAGCTCCGCCGTCTGTGGTTGCT	7	+	1962	3234
ENSDARG00000003069	ENSDART00000020710	20	7	7	ATCAGCTCCGCCGTCTGTGGTTGC	6	+	1962	3234
ENSDARG00000003069	ENSDART00000020710	20	8	8	TGCGTCACACAGATCAGGTGCAGCG	7	+	2048	3234
ENSDARG00000003069	ENSDART00000020710	20	9	9	AAATGCACAGGGAGGGAGGAATCT	6	+	2544	3234
ENSDARG00000003069	ENSDART00000020710	20	9	9	CCCTGCGCCAGTCAGGTCGCTGCC	6	+	2234	3234
ENSDARG00000003069	ENSDART00000020710	20	9	9	GGCCTCTTCCAAAATGGGCAGCC	5	+	2478	3234
ENSDARG00000003069	ENSDART00000020710	20	9	9	CACAAATGCACAGGGAGGGAGGA	5	+	2541	3234
ENSDARG00000003069	ENSDART00000020710	20	10	10	GCCTCCACAAAGACTAGACTTGGCC	7	+	2970	3234
ENSDARG00000003069	ENSDART00000020710	20	10	10	GACCCCCTCCTGAGGGAATAGGGT	6	+	3116	3234
ENSDARG00000003069	ENSDART00000020710	20	10	10	AGCGGCGGCTTCCAGAGGTCTCT	5	+	2657	3234
ENSDARG00000003069	ENSDART00000020710	20	10	10	CCCTTCCACAGAACAGTATGAGGA	6	+	3075	3234
ENSDARG00000003069	ENSDART00000020710	20	10	10	CTCCACAAAGACTAGACTTGGCC	5	+	2972	3234
ENSDARG00000003069	ENSDART00000020710	20	10	10	ACCTCCTCCATCCTACTCTGAGGCT	7	+	2913	3234
ENSDARG00000003069	ENSDART00000020710	20	10	10	ACCCCCTCCTGAGGGAATAGGGT	5	+	3117	3234
ENSDARG00000003069	ENSDART00000020710	20	10	10	GAATACCCCTACAGGAAGTCTGC	5	+	3217	3234
ENSDARG00000003370	ENSDART00000060965	20	1	1	ACCTCAGCCAGAAAAGCTGAAGGA	6	+	3	756
ENSDARG00000003370	ENSDART00000060965	20	1	1	CACCTCAGCCAGAAAAGCTGAAGGA	7	+	2	756
ENSDARG00000003370	ENSDART00000060965	20	3	3	GAAGTCAAACTGATTGACTTTGGG	6	+	502	756
ENSDARG00000003370	ENSDART00000060965	20	3	3	GAAGACACCCCTGAGGACTTGGTA	6	+	370	756
ENSDARG00000003370	ENSDART00000060965	20	4	4	GTTGACCTCTTCAAGTTGCATAA	5	+	691	756
ENSDARG00000003370	ENSDART00000060967	20	2	2	AGAATCATCTTTGCATCTGGAGGA	6	+	171	1398
ENSDARG00000003370	ENSDART00000060967	20	3	3	TTACAACCCCCCAAATGTGGTCTCT	7	+	468	1398
ENSDARG00000003370	ENSDART00000060967	20	3	3	TACAACCCCCCAAATGTGGTCTCT	6	+	469	1398
ENSDARG00000003370	ENSDART00000060967	20	3	3	CCCTCCAAATGTGGTCTCTGCCGAG	7	+	429	1398
ENSDARG00000003370	ENSDART00000060967	20	3	3	CACCTCAGCCAGAAAAGCTGAAGGA	7	+	557	1398
ENSDARG00000003370	ENSDART00000060967	20	3	3	ACCTCAGCCAGAAAAGCTGAAGGA	6	+	558	1398
ENSDARG00000003370	ENSDART00000060967	20	3	3	ACCCCCCTCCAAATGTGGTCTCT	5	+	425	1398
ENSDARG00000003370	ENSDART00000060967	20	3	3	ACCCCCCTCCAAATGTGGTCTCT	5	+	380	1398
ENSDARG00000003370	ENSDART00000060967	20	3	3	ACAACCCCCCAAATGTGGTCTCT	5	+	470	1398
ENSDARG00000003370	ENSDART00000060967	20	5	5	GAAGACACCCCTGAGGACTTGGTA	6	+	925	1398
ENSDARG00000003370	ENSDART00000060967	20	5	5	GAAGTCAAACTGATTGACTTTGGG	6	+	1057	1398
ENSDARG00000003370	ENSDART00000060967	20	6	6	GTTGACCTCTTCAAGTTGCATAA	5	+	1246	1398
ENSDARG00000003370	ENSDART00000060967	20	7	7	TGCCCATGCCTGGTTTAAGGTGAT	6	+	1371	1398
ENSDARG00000003370	ENSDART00000074008	20	1	1	AGAATCATCTTTGCATCTGGAGGA	6	+	33	351
ENSDARG00000003370	ENSDART00000074716	20	2	2	AGAATCATCTTTGCATCTGGAGGA	6	+	171	1404
ENSDARG00000003370	ENSDART00000074716	20	4	4	TTACAACCCCCCAAATGTGGTCTCT	7	+	474	1404
ENSDARG00000003370	ENSDART00000074716	20	4	4	CCCTCCAAATGTGGTCTCTGCCGAG	7	+	435	1404
ENSDARG00000003370	ENSDART00000074716	20	4	4	CACCTCAGCCAGAAAAGCTGAAGGA	7	+	563	1404
ENSDARG00000003370	ENSDART00000074716	20	4	4	ACCTCAGCCAGAAAAGCTGAAGGA	6	+	564	1404
ENSDARG00000003370	ENSDART00000074716	20	4	4	ACCCCCCTCCAAATGTGGTCTCT	5	+	431	1404
ENSDARG00000003370	ENSDART00000074716	20	4	4	ACCCCCCTCCAAATGTGGTCTCT	5	+	386	1404
ENSDARG00000003370	ENSDART00000074716	20	4	4	ACAACCCCCCAAATGTGGTCTCT	5	+	476	1404
ENSDARG00000003370	ENSDART00000074716	20	4	4	TACAACCCCCCAAATGTGGTCTCT	6	+	475	1404
ENSDARG00000003370	ENSDART00000074716	20	6	6	GAAGTCAAACTGATTGACTTTGGG	6	+	1063	1404
ENSDARG00000003370	ENSDART00000074716	20	6	6	GAAGACACCCCTGAGGACTTGGTA	6	+	931	1404
ENSDARG00000003370	ENSDART00000074716	20	7	7	GTTGACCTCTTCAAGTTGCATAA	5	+	1252	1404
ENSDARG00000003370	ENSDART00000074716	20	8	8	TGCCCATGCCTGGTTTAAGGTGAT	6	+	1377	1404
ENSDARG00000003370	ENSDART00000099635	20	2	2	CACCTCAGCCAGAAAAGCTGAAGGA	7	+	1436	1845
ENSDARG00000003370	ENSDART00000099635	20	2	2	CCCTCCAAATGTGGTCTCTGCCGAG	7	+	1308	1845
ENSDARG00000003370	ENSDART00000099635	20	2	2	CTCTACTAATTTCGAGTCTGCCGAG	7	+	1218	1845
ENSDARG00000003370	ENSDART00000099635	20	2	2	TACAACCCCCCAAATGTGGTCTCT	6	+	1348	1845
ENSDARG00000003370	ENSDART00000099635	20	2	2	TTACAACCCCCCAAATGTGGTCTCT	7	+	1347	1845
ENSDARG00000003370	ENSDART00000099635	20	2	2	AGCTCCTCCAGCAGTGATGATGTT	6	+	733	1845
ENSDARG00000003370	ENSDART00000099635	20	2	2	AGAATCATCTTTGCATCTGGAGGA	6	+	171	1845
ENSDARG00000003370	ENSDART00000099635	20	2	2	ACAACCCCCCAAATGTGGTCTCT	5	+	1349	1845
ENSDARG00000003370	ENSDART00000099635	20	2	2	ACAGTCAGCTCCTACAGCAGCTTCT	7	+	847	1845
ENSDARG00000003370	ENSDART00000099635	20	2	2	ACCCCCCTCCAAATGTGGTCTCT	5	+	1259	1845
ENSDARG00000003370	ENSDART00000099635	20	2	2	ACCCCCCTCCAAATGTGGTCTCT	5	+	1304	1845
ENSDARG00000003370	ENSDART00000099635	20	2	2	ACCTCAGCCAGAAAAGCTGAAGGA	6	+	1437	1845
ENSDARG00000003370	ENSDART00000099635	20	4	4	GAAGACACCCCTGAGGACTTGGTA	6	+	1804	1845
ENSDARG00000003584	ENSDART00000016090	20	3	3	ATCCTCATCTGCCTGATTGGGTC	5	+	275	1332
ENSDARG00000003584	ENSDART00000016090	20	5	5	GTATTCTGCCATATGTGTTGAAC	5	+	483	1332
ENSDARG00000003584	ENSDART00000016090	20	6	6	TACTACAGACCATTGAAGACGGG	5	+	664	1332
ENSDARG00000003584	ENSDART00000016090	20	10	10	TTCTTCAGAGGCACTTGTGTGAGTT	7	+	1226	1332
ENSDARG00000003584	ENSDART00000016090	20	10	10	AACAAAGCAACTTTGGCTTTTCT	5	+	1207	1332
ENSDARG00000003673	ENSDART00000035385	20	1	1	GCAACCCGCCATCGCAGCAGCAGCA	7	+	152	5532
ENSDARG00000003673	ENSDART00000035385	20	1	1	GCCATCGCAGCAGCAGCAGTCGGG	6	+	159	5532
ENSDARG00000003673	ENSDART00000035385	20	1	1	CCCGCCATCGCAGCAGCAGCAGTC	6	+	156	5532
ENSDARG00000003673	ENSDART00000035385	20	1	1	GACATCCCCGAGTCCGATGATGCG	6	+	99	5532
ENSDARG00000003673	ENSDART00000035385	20	1	1	CAACCCGCCATCGCAGCAGCAGCA	6	+	153	5532
ENSDARG00000003673	ENSDART00000035385	20	1	1	AGCAGCAGCAGTCGGGTATGGGTT	6	+	167	5532
ENSDARG00000003673	ENSDART00000035385	20	1	1	ACCAACAGCACCCTTCTGGAGCT	5	+	53	5532
ENSDARG00000003673	ENSDART00000035385	20	2	2	GTTCTCAGATGTATGGGATGGGCA	6	+	335	5532
ENSDARG00000003673	ENSDART00000035385	20	3	3	CAACCCCCCTACATGCAGCAGCG	5	+	592	5532
ENSDARG00000003673	ENSDART00000035385	20	3	3	CTCAACCCCCCTACATGCAGCAGCG	7	+	590	5532
ENSDARG00000003673	ENSDART00000035385	20	7	7	GCCCTATGCACCACAGTGTGGGTTC	7	+	1166	5532
ENSDARG00000003673	ENSDART00000035385	20	7	7	GCCCTATGCACCACAGTGTGGGTT	6	+	1166	5532
ENSDARG00000003673	ENSDART00000035385	20	8	8	CTCCACCCAACGTTGGCCGCAAAC	6	+	1505	5532
ENSDARG00000003673	ENSDART00000035385	20	9	9	GGCTCCCACATGCTTGGAATGGGTC	7	+	1606	5532
ENSDARG00000003673	ENSDART00000035385	20	11	11	GACGACAGCGATAGCATTAGCAGCC	7	+	1909	5532
ENSDARG00000003673	ENSDART00000035385	20	12	12	AGAAGCCGCTGGATCTGTGCCGCC	6	+	2111	5532
ENSDARG00000003673	ENSDART00000035385	20	12	12	TACATCGCCTTTATGGAGGAGAG	5	+	2053	5532
ENSDARG00000003673	ENSDART00000035385	20	13	13	TCCACCCACTTGAATGTGGGGAC	5	+	2203	5532
ENSDARG00000003673	ENSDART00000035385	20	13	13	GTCCACCCACTTGAATGTGGGGAC	6	+	2202	5532
ENSDARG00000003673	ENSDART00000035385	20	14	14	TCCTCAATCTACAGGCAGCAGCA	5	+	2418	5532
ENSDARG00000003673	ENSDART00000035385	20	15	15	GTCCCATGCATGGAGGCAGCGGAG	6	+	2591	5532
ENSDARG00000003673	ENSDART00000035385	20	16	16	GTACTCTTACAACCCTGGTTTTGAA	7	+	2778	5532
ENSDARG00000003673	ENSDART00000035385	20	18	18	TACCAAGGCTCATATGATGGCGTC	6	+	3456	5532
ENSDARG00000003673	ENSDART00000035385	20	18	18	TGCCCCCCATGGCTAGCCGGCAAC	6	+	3332	5532
ENSDARG00000003673	ENSDART00000035385	20	18	18	CCCAGCTTAAACCTCGCCGAAGGT	6	+	3614	5532
ENSDARG00000003673	ENSDART00000035385	20	19	19	GACAACACAGTCTCTTCTTTTGGT	6	+	3754	5532
ENSDARG00000003673	ENSDART00000035385	20	20	20	TGCAGCAAAGACGAATGGTGGTGGG	7	+	4810	5532
ENSDARG00000003673	ENSDART00000035385	20	20	20	TTATCCAGAAAGTATCTGCCTTC	5	+	4908	5532
ENSDARG00000003673	ENSDART00000035385	20	20	20	TCCCTCACACCGCAGAGGCTGGTGC	7	+	5014	5532
ENSDARG00000003673	ENSDART00000035385	20	20	20	TCCCTCACACCGCAGAGGCTGGT	5	+	5014	5532
ENSDARG00000003673	ENSDART00000035385	20	20	20	AGCAAAGACGAATGGTGGTGGGAC	6	+	4813	5532
ENSDARG00000003673	ENSDART00000035385	20	20	20	AGCAAAGACGAATGGTGGTGGGA	5	+	4813	5532
ENSDARG00000003673	ENSDART00000035385	20	20	20	AGCCCAGCAGCTCAGCAGCAGCA	5	+	4010	5532
ENSDARG00000003673	ENSDART00000035385	20	20	20	AGCTACTTACCAGCGAGAAGAAGAG	7	+	4773	5532
ENSDARG00000003673	ENSDART00000035385	20	20	20	CCCTCACACCGCAGAGGCTGGTGCT	7	+	5015	5532
ENSDARG00000003673	ENSDART00000035385	20	20	20	CCCTCACACCGCAGAGGCTGGTGC	6	+	5015	5532
ENSDARG00000003673	ENSDART00000035385	20	20	20	GCCTTCCCATTCTGGATGGGCTGCT	7	+	4925	5532
ENSDARG00000003673	ENSDART00000035385	20	20	20	CCCAACAGCTGCCCGAGCTGTTGCC	7	+	5217	5532
ENSDARG00000003673	ENSDART00000035385	20	20	20	GTCAGCAGAGGATAAGGCAGATGAC	7	+	4056	5532
ENSDARG00000003673	ENSDART00000035385	20	20	20	CACACCGCAGAGGCTGGTGCTGGA	6	+	5019	5532
ENSDARG00000003673	ENSDART00000035385	20	20	20	CACCGCAGAGGCTGGTGCTGGAGTG	7	+	5021	5532
ENSDARG00000003681	ENSDART00000019476	20	3	1	TGCCCCGTCTCATCGCTAAGGTGGG	7	+	62	1287
ENSDARG00000003681	ENSDART00000019476	20	5	3	ACCAAATTCTTTGGTTGTGAGTTG	6	+	169	1287
ENSDARG00000003681	ENSDART00000019476	20	6	4	AACTCCTGCAAGGCTTGTGGGTAC	6	+	367	1287
ENSDARG00000003681	ENSDART00000019476	20	9	7	ATCCGCGACCAGATTAAGAAGTA	5	+	853	1287
ENSDARG00000003681	ENSDART00000019476	20	11	9	AGAGGCAGAGGAGGAGAGTGAGGG	6	+	1137	1287
ENSDARG00000003750	ENSDART00000012581	20	2	2	ACAACCAGCGCAAAATGTCTTTTTG	7	-	157	3942
ENSDARG00000003750	ENSDART00000012581	20	3	3	CTCCTAACCTTGATGAGATGTCTGC	7	-	356	3942
ENSDARG00000003750	ENSDART00000012581	20	4	4	ACCTCAAACACATCCTGTGGCCGAA	7	-	494	3942
ENSDARG00000003750	ENSDART00000012581	20	4	4	CTCAAACACATCCTGTGGCCGAA	5	-	494	3942
ENSDARG00000003750	ENSDART00000012581	20	5	5	GCATTCTACACTTGTGGGATTTC	5	-	632	3942
ENSDARG00000003750	ENSDART00000012581	20	7	7	GAATCATACCGGTAGGGAAGTTGTG	7	-	928	3942
ENSDARG00000003750	ENSDART00000012581	20	14	14	CTCCAAAACACTGAGGGTGGGGTCT	7	-	1632	3942
ENSDARG00000003750	ENSDART00000012581	20	14	14	CTCCAAAACACTGAGGGTGGGGTC	6	-	1633	3942
ENSDARG00000003750	ENSDART00000012581	20	14	14	CTCCAAAACACTGAGGGTGGGGT	5	-	1634	3942
ENSDARG00000003750	ENSDART00000012581	20	14	14	AGCTCCAAAACACTGAGGGTGGGGT	7	-	1634	3942
ENSDARG00000003750	ENSDART00000012581	20	14	14	AGCTCCAAAACACTGAGGGTGGG	5	-	1636	3942
ENSDARG00000003750	ENSDART00000012581	20	14	14	TCCAAAACACTGAGGGTGGGGTC	5	-	1633	3942
ENSDARG00000003750	ENSDART00000012581	20	14	14	TCCAAAACACTGAGGGTGGGGTCT	6	-	1632	3942
ENSDARG00000003750	ENSDART00000012581	20	16	16	GGCCACTGCAGGCAGCCGGAGAA	5	-	1979	3942
ENSDARG00000003750	ENSDART00000012581	20	16	16	GTACTATACCTTATTGGTTAGGTA	6	-	2011	3942
ENSDARG00000003750	ENSDART00000012581	20	17	17	GGCCAACACACTGCTGCTGAGCC	5	-	2052	3942
ENSDARG00000003750	ENSDART00000012581	20	18	18	AGCTCCCTCTCCTGGCAGTTTAG	5	-	2291	3942
ENSDARG00000003750	ENSDART00000012581	20	22	22	CAAGACTAAGCTCCTCTGAAAAC	5	-	2811	3942
ENSDARG00000003750	ENSDART00000012581	20	23	23	GAACACACAGTGGATTAGCCTGC	5	-	3039	3942
ENSDARG00000003750	ENSDART00000012581	20	28	28	ACATGCTAAGCCACGGTGATGGC	5	-	3897	3942
ENSDARG00000003750	ENSDART00000012581	20	28	28	AGCCAATTAGCTTCTGTTGAGCC	5	-	3672	3942
ENSDARG00000003750	ENSDART00000012581	20	28	28	GTCATCCACATAACGCAGAGGAG	5	-	3704	3942
ENSDARG00000003751	ENSDART00000027119	20	1	1	CTCTGCTCCGGCTTGGACGCATTG	6	-	144	3204
ENSDARG00000003751	ENSDART00000027119	20	1	1	TGCTCCGGCTTGGACGCATTGGAG	6	-	141	3204
ENSDARG00000003751	ENSDART00000027119	20	1	1	GTTGTCTCCGCTGGAGGAGCTGTC	6	-	286	3204
ENSDARG00000003751	ENSDART00000027119	20	1	1	GTTTGCTGCTGTCTGCGGAGCTGTT	7	-	307	3204
ENSDARG00000003751	ENSDART00000027119	20	1	1	GCAAACGGCTGCAGGGATTTGCG	5	-	259	3204
ENSDARG00000003751	ENSDART00000027119	20	1	1	TCCTGCGTCTGGAGTGTGTGTTT	5	-	328	3204
ENSDARG00000003751	ENSDART00000027119	20	1	1	TCCTGCGTCTGGAGTGTGTGTTTGC	7	-	326	3204
ENSDARG00000003751	ENSDART00000027119	20	3	3	GCCGCCGCAACAATGGCTGTTGAA	6	-	470	3204
ENSDARG00000003751	ENSDART00000027119	20	3	3	GGCACCAGCATGCTCTGAGGGAGGC	7	-	1076	3204
ENSDARG00000003751	ENSDART00000027119	20	3	3	GGCGGCTGCTGCTGCTGGAGCAGGT	7	-	1499	3204
ENSDARG00000003751	ENSDART00000027119	20	3	3	GGCTGCTGCTGCTGGAGCAGGTGTT	7	-	1496	3204
ENSDARG00000003751	ENSDART00000027119	20	3	3	TGCATCTGCTGGGCTGTGGGGCTCT	7	-	1016	3204
ENSDARG00000003751	ENSDART00000027119	20	3	3	GTTCCCAGAATAGCGCTTGGTTG	5	-	725	3204
ENSDARG00000003751	ENSDART00000027119	20	3	3	TGCATCTGCTGGGCTGTGGGGCT	5	-	1018	3204
ENSDARG00000003751	ENSDART00000027119	20	3	3	GCCCTCGGCCCTCTCGCTGGAGCA	6	-	1609	3204
ENSDARG00000003751	ENSDART00000027119	20	3	3	GCCATCACCTCGAGGGCCTTGGGG	6	-	781	3204
ENSDARG00000003751	ENSDART00000027119	20	3	3	TGCCGCCGCAACAATGGCTGTTGAA	7	-	470	3204
ENSDARG00000003751	ENSDART00000027119	20	3	3	GACTTCAGCAGCGGGTGCGGGGGGC	7	-	1437	3204
ENSDARG00000003751	ENSDART00000027119	20	3	3	GACTTCAGCAGCGGGTGCGGGGGG	6	-	1438	3204
ENSDARG00000003751	ENSDART00000027119	20	3	3	GACTGCATCTGCTGGGCTGTGGGG	6	-	1020	3204
ENSDARG00000003751	ENSDART00000027119	20	3	3	GAACCCTTCCAGCTTTGCCGCCGCA	7	-	485	3204
ENSDARG00000003751	ENSDART00000027119	20	3	3	TTCAGCAGCGGGTGCGGGGGGCGTG	7	-	1434	3204
ENSDARG00000003751	ENSDART00000027119	20	3	3	CGCCGCAACAATGGCTGTTGAATTT	7	-	467	3204
ENSDARG00000003751	ENSDART00000027119	20	4	4	TTCCTCGTCTCGTTTGTGACGGC	5	-	1679	3204
ENSDARG00000003751	ENSDART00000027119	20	4	4	TCCTGCGCATCCTCTGCTGGTGGT	6	-	1787	3204
ENSDARG00000003751	ENSDART00000027119	20	4	4	CGCACCGGCACCGGGGACGTCGTG	6	-	1656	3204
ENSDARG00000003751	ENSDART00000027119	20	5	5	AGACTCACCGCTTTGGTAGTATTT	6	-	2407	3204
ENSDARG00000003751	ENSDART00000027119	20	5	5	CGCATCTGCTCCTGTGCGTCGCC	5	-	1852	3204
ENSDARG00000003751	ENSDART00000027119	20	6	6	CGCAGCGGCAGTTTGCAGAATCT	5	-	2469	3204
ENSDARG00000003751	ENSDART00000027119	20	6	6	CCCCGCAGCGGCAGTTTGCAGAA	5	-	2472	3204
ENSDARG00000003751	ENSDART00000027119	20	6	6	GGCTCATACCGGTGCGCAGCAGAA	6	-	2591	3204
ENSDARG00000003751	ENSDART00000027119	20	7	7	TTCATCTGCGTCTCCAGAGGAGTTG	7	-	2687	3204
ENSDARG00000003751	ENSDART00000027119	20	7	7	TGCGTCTCCAGAGGAGTTGTGGCC	6	-	2682	3204
ENSDARG00000003751	ENSDART00000027119	20	7	7	CACAGCTGCGTGTAGCCTAGGAT	5	-	2599	3204
ENSDARG00000003751	ENSDART00000027119	20	7	7	ATCTGCGTCTCCAGAGGAGTTGTG	6	-	2685	3204
ENSDARG00000003751	ENSDART00000027119	20	8	8	TGCTCCATCGGCCGCTGCGACGGC	6	-	3168	3204
ENSDARG00000003751	ENSDART00000027119	20	8	8	GTTGTCGTCGAAAAAGCGGCGGAA	6	-	3067	3204
ENSDARG00000003751	ENSDART00000027119	20	8	8	CTCGTCCTCTTCCACGTAGTCTTC	6	-	3145	3204
ENSDARG00000003751	ENSDART00000081949	20	1	1	GTTTGCTGCTGTCTGCGGAGCTGTT	7	-	307	1332
ENSDARG00000003751	ENSDART00000081949	20	1	1	TCCTGCGTCTGGAGTGTGTGTTT	5	-	328	1332
ENSDARG00000003751	ENSDART00000081949	20	1	1	TCCTGCGTCTGGAGTGTGTGTTTGC	7	-	326	1332
ENSDARG00000003751	ENSDART00000081949	20	1	1	TGCTCCGGCTTGGACGCATTGGAG	6	-	141	1332
ENSDARG00000003751	ENSDART00000081949	20	1	1	GTTGTCTCCGCTGGAGGAGCTGTC	6	-	286	1332
ENSDARG00000003751	ENSDART00000081949	20	1	1	GCAAACGGCTGCAGGGATTTGCG	5	-	259	1332
ENSDARG00000003751	ENSDART00000081949	20	1	1	CTCTGCTCCGGCTTGGACGCATTG	6	-	144	1332
ENSDARG00000003751	ENSDART00000081949	20	3	3	GCCATCACCTCGAGGGCCTTGGGG	6	-	781	1332
ENSDARG00000003751	ENSDART00000081949	20	3	3	CGCCGCAACAATGGCTGTTGAATTT	7	-	467	1332
ENSDARG00000003751	ENSDART00000081949	20	3	3	TGCCGCCGCAACAATGGCTGTTGAA	7	-	470	1332
ENSDARG00000003751	ENSDART00000081949	20	3	3	TGCATCTGCTGGGCTGTGGGGCTCT	7	-	1016	1332
ENSDARG00000003751	ENSDART00000081949	20	3	3	TGCATCTGCTGGGCTGTGGGGCT	5	-	1018	1332
ENSDARG00000003751	ENSDART00000081949	20	3	3	GAACCCTTCCAGCTTTGCCGCCGCA	7	-	485	1332
ENSDARG00000003751	ENSDART00000081949	20	3	3	GACTGCATCTGCTGGGCTGTGGGG	6	-	1020	1332
ENSDARG00000003751	ENSDART00000081949	20	3	3	GTTCCCAGAATAGCGCTTGGTTG	5	-	725	1332
ENSDARG00000003751	ENSDART00000081949	20	3	3	GGCACCAGCATGCTCTGAGGGAGGC	7	-	1076	1332
ENSDARG00000003751	ENSDART00000081949	20	3	3	GCCGCCGCAACAATGGCTGTTGAA	6	-	470	1332
ENSDARG00000003797	ENSDART00000026088	20	1	1	GCCCAATAAAGATGGCTGGTTAC	5	+	99	3234
ENSDARG00000003797	ENSDART00000026088	20	1	1	TACCGCTTCATGAATGTGCCTGC	5	+	119	3234
ENSDARG00000003797	ENSDART00000026088	20	1	1	GCCTGCAACGGCCATGTGGAGTG	5	+	136	3234
ENSDARG00000003797	ENSDART00000026088	20	1	1	GCCTGCAACGGCCATGTGGAGTGC	6	+	136	3234
ENSDARG00000003797	ENSDART00000026088	20	2	2	CGCTCATTCTGGCTGTGGGTCGCA	6	+	224	3234
ENSDARG00000003797	ENSDART00000026088	20	4	4	AACAAAGCCAACAAATCTGGATTG	6	+	694	3234
ENSDARG00000003797	ENSDART00000026088	20	5	5	ACCCTCTGCTTGTGGCTGTGAGGAA	7	+	1031	3234
ENSDARG00000003797	ENSDART00000026088	20	5	5	AGCTTCCCAGCAGCTCTGGTTTT	5	+	1132	3234
ENSDARG00000003797	ENSDART00000026088	20	5	5	GTCCCCTTCATTTCGCAGCTGAG	5	+	815	3234
ENSDARG00000003797	ENSDART00000026088	20	6	6	TGCTCCCTCAGTCAGTGGTTTGGTT	7	+	1344	3234
ENSDARG00000003797	ENSDART00000026088	20	6	6	TGCTCCCTCAGTCAGTGGTTTGGT	6	+	1344	3234
ENSDARG00000003797	ENSDART00000026088	20	6	6	CTAGACAACAACAAAGACTGGGCT	6	+	1438	3234
ENSDARG00000003797	ENSDART00000026088	20	6	6	CCCTCAGTCAGTGGTTTGGTTGGAC	7	+	1348	3234
ENSDARG00000003797	ENSDART00000026088	20	7	7	GAACAAGCCATCATCAGCAGCAGCA	7	+	1668	3234
ENSDARG00000003797	ENSDART00000026088	20	7	7	CCCAACAACAACAGCGGCAGCAGAC	7	+	1724	3234
ENSDARG00000003797	ENSDART00000026088	20	7	7	CACCCCAACAACAACAGCGGCAGCA	7	+	1721	3234
ENSDARG00000003797	ENSDART00000026088	20	7	7	ATCAGCAGCAGCAACAGCAGCATGC	7	+	1680	3234
ENSDARG00000003797	ENSDART00000026088	20	7	7	ACCCCAACAACAACAGCGGCAGCA	6	+	1722	3234
ENSDARG00000003797	ENSDART00000026088	20	7	7	ACAGGCACCAACCTGGAATTTGCT	6	+	1522	3234
ENSDARG00000003797	ENSDART00000026088	20	7	7	GGCACCAACCTGGAATTTGCTGAC	6	+	1525	3234
ENSDARG00000003797	ENSDART00000026088	20	9	9	GAATCACTCCTATCTTTGTAGCG	5	+	2123	3234
ENSDARG00000003797	ENSDART00000026088	20	10	10	AGCCACAGCGCTGTATGAGGCCTGT	7	+	2223	3234
ENSDARG00000003797	ENSDART00000026088	20	11	11	GACCTCCTCACTTTTGGGTGTAC	5	+	2368	3234
ENSDARG00000003797	ENSDART00000026088	20	11	11	AAAGACCTCCTCACTTTTGGGTGT	6	+	2365	3234
ENSDARG00000003797	ENSDART00000026088	20	11	11	AAAGACCTCCTCACTTTTGGGTG	5	+	2365	3234
ENSDARG00000003797	ENSDART00000026088	20	12	12	AGCTACCACTATGCTTCTGGAGGC	6	+	2637	3234
ENSDARG00000003797	ENSDART00000026088	20	12	12	GCATACAGACTGTGACTCTGCTGGT	7	+	2720	3234
ENSDARG00000003797	ENSDART00000026088	20	12	12	CTATGCTTCTGGAGGCTGGTGCC	5	+	2645	3234
ENSDARG00000003797	ENSDART00000026088	20	12	12	AGAAAAGACCTGTGTTCTGGTGAG	6	+	2958	3234
ENSDARG00000003797	ENSDART00000026088	20	12	12	GCCCTCTCCATTTGGCTGCGGAG	5	+	2474	3234
ENSDARG00000003797	ENSDART00000026088	20	12	12	GTATCAGCCCTCTCCATTTGGCTGC	7	+	2468	3234
ENSDARG00000003797	ENSDART00000026088	20	12	12	GCCCTCTCCATTTGGCTGCGGAGCG	7	+	2474	3234
ENSDARG00000003797	ENSDART00000026088	20	14	14	CGCCCACTCATGCAGCTGTGCAGAC	7	+	3139	3234
ENSDARG00000003797	ENSDART00000026088	20	14	14	CTCCACGCCCACTCATGCAGCTGTG	7	+	3134	3234
ENSDARG00000003797	ENSDART00000103288	20	1	1	TTAAAATTCTCCTGAGAGGTAGAG	6	+	56	1386
ENSDARG00000003797	ENSDART00000103288	20	3	3	GAATCACTCCTATCTTTGTAGCG	5	+	407	1386
ENSDARG00000003797	ENSDART00000103288	20	4	4	AGCCACAGCGCTGTATGAGGCCTGT	7	+	507	1386
ENSDARG00000003797	ENSDART00000103288	20	5	5	GCCCTCTCCATTTGGCTGCGGAG	5	+	707	1386
ENSDARG00000003797	ENSDART00000103288	20	5	5	GCATACAGACTGTGACTCTGCTGGT	7	+	953	1386
ENSDARG00000003797	ENSDART00000103288	20	5	5	CTATGCTTCTGGAGGCTGGTGCC	5	+	878	1386
ENSDARG00000003797	ENSDART00000103288	20	5	5	AGCTACCACTATGCTTCTGGAGGC	6	+	870	1386
ENSDARG00000003797	ENSDART00000103288	20	5	5	GTATCAGCCCTCTCCATTTGGCTGC	7	+	701	1386
ENSDARG00000003797	ENSDART00000103288	20	5	5	GCCCTCTCCATTTGGCTGCGGAGCG	7	+	707	1386
ENSDARG00000003797	ENSDART00000103288	20	6	6	AGAAAAGACCTGTGTTCTGGTGAG	6	+	1137	1386
ENSDARG00000003797	ENSDART00000103288	20	8	8	CTCCACGCCCACTCATGCAGCTGTG	7	+	1343	1386
ENSDARG00000003797	ENSDART00000103288	20	8	8	CGCCCACTCATGCAGCTGTGCAGAC	7	+	1348	1386
ENSDARG00000003797	ENSDART00000103289	20	1	1	TTAAAATTCTCCTGAGAGGTAGAG	6	+	62	1455
ENSDARG00000003797	ENSDART00000103289	20	3	3	GAATCACTCCTATCTTTGTAGCG	5	+	413	1455
ENSDARG00000003797	ENSDART00000103289	20	4	4	AGCCACAGCGCTGTATGAGGCCTGT	7	+	513	1455
ENSDARG00000003797	ENSDART00000103289	20	5	5	GTATCAGCCCTCTCCATTTGGCTGC	7	+	707	1455
ENSDARG00000003797	ENSDART00000103289	20	5	5	GCCCTCTCCATTTGGCTGCGGAGCG	7	+	713	1455
ENSDARG00000003797	ENSDART00000103289	20	5	5	GCCCTCTCCATTTGGCTGCGGAG	5	+	713	1455
ENSDARG00000003797	ENSDART00000103289	20	5	5	GCATACAGACTGTGACTCTGCTGGT	7	+	959	1455
ENSDARG00000003797	ENSDART00000103289	20	5	5	CTATGCTTCTGGAGGCTGGTGCC	5	+	884	1455
ENSDARG00000003797	ENSDART00000103289	20	5	5	AGCTACCACTATGCTTCTGGAGGC	6	+	876	1455
ENSDARG00000003797	ENSDART00000103289	20	8	8	CTCCACGCCCACTCATGCAGCTGTG	7	+	1352	1455
ENSDARG00000003797	ENSDART00000103289	20	8	8	CGCCCACTCATGCAGCTGTGCAGAC	7	+	1357	1455
ENSDARG00000003797	ENSDART00000103290	20	1	1	TTAAAATTCTCCTGAGAGGTAGAG	6	+	149	1608
ENSDARG00000003797	ENSDART00000103290	20	3	3	GAATCACTCCTATCTTTGTAGCG	5	+	500	1608
ENSDARG00000003797	ENSDART00000103290	20	4	4	AGCCACAGCGCTGTATGAGGCCTGT	7	+	600	1608
ENSDARG00000003797	ENSDART00000103290	20	5	5	GTATCAGCCCTCTCCATTTGGCTGC	7	+	794	1608
ENSDARG00000003797	ENSDART00000103290	20	5	5	GCCCTCTCCATTTGGCTGCGGAGCG	7	+	800	1608
ENSDARG00000003797	ENSDART00000103290	20	5	5	GCCCTCTCCATTTGGCTGCGGAG	5	+	800	1608
ENSDARG00000003797	ENSDART00000103290	20	5	5	GCATACAGACTGTGACTCTGCTGGT	7	+	1046	1608
ENSDARG00000003797	ENSDART00000103290	20	5	5	CTATGCTTCTGGAGGCTGGTGCC	5	+	971	1608
ENSDARG00000003797	ENSDART00000103290	20	5	5	AGCTACCACTATGCTTCTGGAGGC	6	+	963	1608
ENSDARG00000003797	ENSDART00000103290	20	5	5	AGAAAAGACCTGTGTTCTGGTGAG	6	+	1284	1608
ENSDARG00000003797	ENSDART00000103290	20	7	7	CTCCACGCCCACTCATGCAGCTGTG	7	+	1460	1608
ENSDARG00000003797	ENSDART00000103290	20	7	7	CGCCCACTCATGCAGCTGTGCAGAC	7	+	1465	1608
ENSDARG00000003977	ENSDART00000018519	20	1	1	AACACCAGCACAAGTTCTGACTTC	6	-	12	1317
ENSDARG00000003977	ENSDART00000018519	20	3	3	TTACTCCTCCACCAGGATAGTAG	5	-	417	1317
ENSDARG00000003977	ENSDART00000018519	20	3	3	GACAAAGTCAAAGTCCTCTTTGGCG	7	-	546	1317
ENSDARG00000003977	ENSDART00000018519	20	3	3	ACCGTCAGATTTGGATGTGCGTTC	6	-	900	1317
ENSDARG00000003977	ENSDART00000018519	20	3	3	AAAGTCAAAGTCCTCTTTGGCGAA	6	-	544	1317
ENSDARG00000003977	ENSDART00000018519	20	4	4	GTTATCCACTAGCATGCCTTTGGT	6	-	1222	1317
ENSDARG00000003977	ENSDART00000078458	20	2	2	AACACCAGCACAAGTTCTGACTTC	6	-	30	1251
ENSDARG00000003977	ENSDART00000078458	20	4	4	TTACTCCTCCACCAGGATAGTAG	5	-	435	1251
ENSDARG00000003977	ENSDART00000078458	20	4	4	GACAAAGTCAAAGTCCTCTTTGGCG	7	-	564	1251
ENSDARG00000003977	ENSDART00000078458	20	4	4	ACCGTCAGATTTGGATGTGCGTTC	6	-	918	1251
ENSDARG00000003977	ENSDART00000078458	20	4	4	AAAGTCAAAGTCCTCTTTGGCGAA	6	-	562	1251
ENSDARG00000003977	ENSDART00000078458	20	5	5	GTTATCCACTAGCATGCCTTTGGT	6	-	1240	1251
ENSDARG00000003977	ENSDART00000103078	20	1	1	AACACCAGCACAAGTTCTGACTTC	6	-	12	1332
ENSDARG00000003977	ENSDART00000103078	20	3	3	TTACTCCTCCACCAGGATAGTAG	5	-	417	1332
ENSDARG00000003977	ENSDART00000103078	20	3	3	GACAAAGTCAAAGTCCTCTTTGGCG	7	-	546	1332
ENSDARG00000003977	ENSDART00000103078	20	3	3	ACCGTCAGATTTGGATGTGCGTTC	6	-	900	1332
ENSDARG00000003977	ENSDART00000103078	20	3	3	AAAGTCAAAGTCCTCTTTGGCGAA	6	-	544	1332
ENSDARG00000003977	ENSDART00000103078	20	7	7	AGCGCCAAAGAGAGGAAGAGGAG	5	-	1276	1332
ENSDARG00000003977	ENSDART00000103078	20	7	7	CTCAGCGCCAAAGAGAGGAAGAG	5	-	1279	1332
ENSDARG00000004049	ENSDART00000022702	20	1	1	AACTGCAGCCTCTCCTGGGTTTTC	6	-	58	708
ENSDARG00000004049	ENSDART00000022702	20	2	2	GGCCGCCTCCTCTGTGGTTTGGGCC	7	-	504	708
ENSDARG00000004049	ENSDART00000022702	20	2	2	TACAGCCTCCTCTTCAGTCGGTGCA	7	-	276	708
ENSDARG00000004049	ENSDART00000022702	20	2	2	TCCATCCTCTGCTGGTGCGGTGCC	6	-	193	708
ENSDARG00000004049	ENSDART00000022702	20	2	2	TGCATCGCCGTTCACTCTTAGGTG	6	-	127	708
ENSDARG00000004049	ENSDART00000022702	20	2	2	TGCTCAGCAGCTGCTGGAGATGCA	6	-	147	708
ENSDARG00000004049	ENSDART00000022702	20	2	2	TTCAACAGCTCCATCCGTCTTGGCT	7	-	462	708
ENSDARG00000004049	ENSDART00000022702	20	2	2	TTCAACTACTCTGTGGCAGCTTCT	6	-	702	708
ENSDARG00000004049	ENSDART00000022702	20	2	2	TTCTGCTTCCTGTGCAGAGGGAGCC	7	-	657	708
ENSDARG00000004049	ENSDART00000022702	20	2	2	GGCCGCCTCCTCTGTGGTTTGGGC	6	-	505	708
ENSDARG00000004049	ENSDART00000022702	20	2	2	GGCCGCCTCCTCTGTGGTTTGGG	5	-	506	708
ENSDARG00000004049	ENSDART00000022702	20	2	2	GCCGCCTCCTCTGTGGTTTGGGCC	6	-	504	708
ENSDARG00000004049	ENSDART00000022702	20	2	2	ACAGCCTCCTCTTCAGTCGGTGCA	6	-	276	708
ENSDARG00000004049	ENSDART00000022702	20	2	2	ATCCTCTGCTGGTGCGGTGCCGTT	6	-	190	708
ENSDARG00000004049	ENSDART00000022702	20	2	2	CGCCACTGCTGGCTCAGTTTTTGAC	7	-	585	708
ENSDARG00000004049	ENSDART00000022702	20	2	2	CGCCTCCTCTGTGGTTTGGGCCTTC	7	-	501	708
ENSDARG00000004049	ENSDART00000022702	20	2	2	CGCTTCTTCTTCTTCTTAGGGGTC	6	-	333	708
ENSDARG00000004049	ENSDART00000022702	20	2	2	CTCTCCATCCTCTGCTGGTGCGGTG	7	-	195	708
ENSDARG00000004049	ENSDART00000022702	20	2	2	GCATTCTGCTTCCTGTGCAGAGGGA	7	-	660	708
ENSDARG00000004049	ENSDART00000022702	20	2	2	GCCGCCTCCTCTGTGGTTTGGGC	5	-	505	708
ENSDARG00000004074	ENSDART00000028717	20	1	1	TGCTCAGCATGCCAGAGGAGGTA	5	+	233	2391
ENSDARG00000004074	ENSDART00000028717	20	1	1	ACATCCTGCTGGGTCTGAATGAGCA	7	+	74	2391
ENSDARG00000004074	ENSDART00000028717	20	2	2	ACAAGCACAATAACGACGCCTCT	5	+	695	2391
ENSDARG00000004074	ENSDART00000028717	20	2	2	GTCATCTTCTCCTCAGGGGCCTGT	6	+	1192	2391
ENSDARG00000004074	ENSDART00000028717	20	2	2	GTCCTATTCTTACGCTGAGGACGGA	7	+	1476	2391
ENSDARG00000004074	ENSDART00000028717	20	2	2	GTCGCCTTCCTGCGATGGTGTGTGC	7	+	1137	2391
ENSDARG00000004074	ENSDART00000028717	20	2	2	GTTCTCCACGATCTCGTCTTTGTG	6	+	524	2391
ENSDARG00000004074	ENSDART00000028717	20	2	2	TACGGCCCAAGATAAAGTGTGAGCA	7	+	1628	2391
ENSDARG00000004074	ENSDART00000028717	20	2	2	TCCCCCTGCAGCCTGCCGCAGTT	5	+	1510	2391
ENSDARG00000004074	ENSDART00000028717	20	2	2	TGCCTATACGGCTAAGCTGCTGCT	6	+	288	2391
ENSDARG00000004074	ENSDART00000028717	20	2	2	TTCCAAGCACATTCAAGGAGATGAG	7	+	740	2391
ENSDARG00000004074	ENSDART00000028717	20	2	2	TTCCCCAAAGACACTGATGGTTTC	6	+	1093	2391
ENSDARG00000004074	ENSDART00000028717	20	2	2	GCCAGCGACCCGCCCTTGCTTTGCC	7	+	1357	2391
ENSDARG00000004074	ENSDART00000028717	20	2	2	GCATGCAACCTGAGTTGCTGACGAC	7	+	479	2391
ENSDARG00000004074	ENSDART00000028717	20	2	2	GCAGCCTGCCGCAGTTTGAGTTT	5	+	1517	2391
ENSDARG00000004074	ENSDART00000028717	20	2	2	AGCTGCGCAGTGAAGAGGACGGC	5	+	404	2391
ENSDARG00000004074	ENSDART00000028717	20	2	2	GAAGTCGCCTTCCTGCGATGGTGTG	7	+	1134	2391
ENSDARG00000004074	ENSDART00000028717	20	2	2	CCCAGCTGCGCAGTGAAGAGGAC	5	+	401	2391
ENSDARG00000004074	ENSDART00000028717	20	2	2	CACCCCAGCAGCTCTTAGCTAAC	5	+	974	2391
ENSDARG00000004074	ENSDART00000028717	20	2	2	CACACCCCAGCAGCTCTTAGCTAAC	7	+	972	2391
ENSDARG00000004074	ENSDART00000028717	20	3	3	ATCCACGACGTGCGCAGACGTAGTA	7	+	1843	2391
ENSDARG00000004074	ENSDART00000028717	20	3	3	TTCATCCACGACGTGCGCAGACGTA	7	+	1840	2391
ENSDARG00000004074	ENSDART00000028717	20	3	3	AACGACTTCCAAATGATGGTGAA	5	+	1786	2391
ENSDARG00000004074	ENSDART00000028717	20	4	4	CAATCAAACGGTGACAGTAGACTTC	7	+	2316	2391
ENSDARG00000004074	ENSDART00000028717	20	4	4	GCAGCCAACCACAGGGAGGAGCA	5	+	2245	2391
ENSDARG00000004111	ENSDART00000024518	20	2	1	ACCTTCGGCACCTCGTCGCCTGC	5	+	100	1707
ENSDARG00000004111	ENSDART00000024518	20	5	4	TGCTGCTGCTGCTGGGGGCTGAGCC	7	+	860	1707
ENSDARG00000004111	ENSDART00000024518	20	5	4	TGCTGCTGCTGCTGGGGGCTGAG	5	+	860	1707
ENSDARG00000004111	ENSDART00000024518	20	5	4	AGAAGCGCAGTGGTGGGGTGGTC	5	+	806	1707
ENSDARG00000004111	ENSDART00000024518	20	7	6	AGCTCAAGCTGGAGGAATTTGTG	5	+	1229	1707
ENSDARG00000004111	ENSDART00000024518	20	9	8	GTTCCAGTCTTCAGGGAAGGTGCA	6	+	1557	1707
ENSDARG00000004111	ENSDART00000024518	20	9	8	CACACCCACAACCAGCAGCAGCA	5	+	1617	1707
ENSDARG00000004111	ENSDART00000024518	20	9	8	AGCAACAACAGTCCAAGAGGAGGAG	7	+	1642	1707
ENSDARG00000004111	ENSDART00000024518	20	9	8	ACCCACAACCAGCAGCAGCAGCA	5	+	1620	1707
ENSDARG00000004111	ENSDART00000024518	20	9	8	ACACCCACAACCAGCAGCAGCAGCA	7	+	1618	1707
ENSDARG00000004111	ENSDART00000087844	20	3	3	AGAAGCGCAGTGGTGGGGTGGTC	5	+	164	828
ENSDARG00000004111	ENSDART00000087844	20	3	3	TGCTGCTGCTGCTGGGGGCTGAG	5	+	218	828
ENSDARG00000004111	ENSDART00000087844	20	3	3	TGCTGCTGCTGCTGGGGGCTGAGCC	7	+	218	828
ENSDARG00000004111	ENSDART00000087844	20	5	5	AGCTCAAGCTGGAGGAATTTGTG	5	+	587	828
ENSDARG00000004192	ENSDART00000044619	20	2	2	ACATTCGCCGGTCTCGCCGCTGGG	6	+	66	813
ENSDARG00000004192	ENSDART00000044619	20	2	2	AAAATCGCAGCAACAGTGTGGGCA	6	+	20	813
ENSDARG00000004192	ENSDART00000044619	20	4	4	AACTCAGTCAACGCCGGCTGGAAC	6	+	574	813
ENSDARG00000004192	ENSDART00000044619	20	4	4	GTTCACGTCCCGCATGTGTGAGTGT	7	+	447	813
ENSDARG00000004192	ENSDART00000044619	20	4	4	GTTCACGTCCCGCATGTGTGAGTG	6	+	447	813
ENSDARG00000004192	ENSDART00000044619	20	4	4	TTCAGCCACTGCAGGTGGAGTTG	5	+	395	813
ENSDARG00000004192	ENSDART00000044619	20	4	4	TTCAGCCACTGCAGGTGGAGTTGGA	7	+	395	813
ENSDARG00000004192	ENSDART00000044619	20	4	4	AGCTTCAGCCACTGCAGGTGGAGTT	7	+	392	813
ENSDARG00000004192	ENSDART00000044619	20	4	4	AGCCACTGCAGGTGGAGTTGGAGCG	7	+	398	813
ENSDARG00000004192	ENSDART00000044619	20	4	4	AGCCACTGCAGGTGGAGTTGGAG	5	+	398	813
ENSDARG00000004192	ENSDART00000044619	20	4	4	TCCAGCTTCAGCCACTGCAGGTGGA	7	+	389	813
ENSDARG00000004192	ENSDART00000044619	20	5	5	CGCTGCTTCTTGTGGAGGCGGTGTG	7	+	696	813
ENSDARG00000004192	ENSDART00000044619	20	5	5	CGCTGCTTCTTGTGGAGGCGGTG	5	+	696	813
ENSDARG00000004517	ENSDART00000007379	20	1	1	CGCGACCTCCAGTTGTGTTGGCC	5	-	77	582
ENSDARG00000004517	ENSDART00000007379	20	4	4	AAAGCCCACCTTCTTGCGCAGTG	5	-	320	582
ENSDARG00000004517	ENSDART00000007379	20	5	5	GACCCAATCAGGATTGTCGAGTTC	6	-	418	582
ENSDARG00000004517	ENSDART00000007379	20	6	6	ACAAGCAGCGAGTATGATGTAGGC	6	-	471	582
ENSDARG00000004517	ENSDART00000007379	20	6	6	TCCCACACCTGAGCTGTGCAGTT	5	-	578	582
ENSDARG00000004517	ENSDART00000078385	20	1	1	CGCGACCTCCAGTTGTGTTGGCC	5	-	77	1524
ENSDARG00000004517	ENSDART00000078385	20	3	3	AAAGCCCACCTTCTTGCGCAGTG	5	-	398	1524
ENSDARG00000004517	ENSDART00000078385	20	4	4	GACCCAATCAGGATTGTCGAGTTC	6	-	496	1524
ENSDARG00000004517	ENSDART00000078385	20	5	5	ATCCCACACCTGAGCTGTGCAGTT	6	-	656	1524
ENSDARG00000004517	ENSDART00000078385	20	5	5	ACAAGCAGCGAGTATGATGTAGGC	6	-	549	1524
ENSDARG00000004517	ENSDART00000078385	20	5	5	TCCCACACCTGAGCTGTGCAGTT	5	-	656	1524
ENSDARG00000004517	ENSDART00000078385	20	6	6	AAACCACCCAGCCTTCTGTGTCT	5	-	684	1524
ENSDARG00000004517	ENSDART00000078385	20	6	6	AACCACCCAGCCTTCTGTGTCTGC	6	-	682	1524
ENSDARG00000004517	ENSDART00000078385	20	6	6	GAAACCACCCAGCCTTCTGTGTCT	6	-	684	1524
ENSDARG00000004517	ENSDART00000078385	20	6	6	AAACCACCCAGCCTTCTGTGTCTGC	7	-	682	1524
ENSDARG00000004517	ENSDART00000078385	20	6	6	CACCCAGCCTTCTGTGTCTGCTTCT	7	-	678	1524
ENSDARG00000004517	ENSDART00000078385	20	8	8	GTATCCTAATGCTGCAGGCGTGGCT	7	-	990	1524
ENSDARG00000004517	ENSDART00000078385	20	8	8	GACCACATCAGCATCAGTGGGAGCC	7	-	948	1524
ENSDARG00000004517	ENSDART00000078385	20	9	9	TTCTACCCACATATCGGTTTTTAC	6	-	1052	1524
ENSDARG00000004517	ENSDART00000078385	20	9	9	TCCTTCAGCAGTTTTATAATAGGTG	7	-	1205	1524
ENSDARG00000004517	ENSDART00000078385	20	9	9	GTTCTACCCACATATCGGTTTTTAC	7	-	1052	1524
ENSDARG00000004517	ENSDART00000078385	20	9	9	GGCCACTCCAAGCTGACGCAGGC	5	-	1097	1524
ENSDARG00000004517	ENSDART00000078385	20	11	11	CACTCCAGCTCCACTGGGTATTT	5	-	1510	1524
ENSDARG00000004574	ENSDART00000020969	20	1	1	GCAGACACACAACTGTCTGGTAA	5	+	154	2490
ENSDARG00000004574	ENSDART00000020969	20	3	3	TGCCCCAGAAAAGGATGATGTAGAG	7	+	576	2490
ENSDARG00000004574	ENSDART00000020969	20	3	3	GCCCAAATCTGGAGAAGCCGTTGTC	7	+	462	2490
ENSDARG00000004574	ENSDART00000020969	20	3	3	CTAGGCCCAAATCTGGAGAAGCC	5	+	458	2490
ENSDARG00000004574	ENSDART00000020969	20	3	3	AGAGGCAGAGAGCGATGAAGAGGAT	7	+	597	2490
ENSDARG00000004574	ENSDART00000020969	20	4	4	GTTTGCTTCCAAATGGCTTGGCT	5	+	695	2490
ENSDARG00000004574	ENSDART00000020969	20	5	5	GAAAACTTCTCCCCATGGGTGTTT	6	+	772	2490
ENSDARG00000004574	ENSDART00000020969	20	7	7	ACATCATCCTGAGCGATGGGACTCT	7	+	957	2490
ENSDARG00000004574	ENSDART00000020969	20	9	9	CTCCACAGATGCCTAGATTAGGTG	6	+	1283	2490
ENSDARG00000004574	ENSDART00000020969	20	10	10	AGAAGCTTCTGTCTCTGAAGATGGG	7	+	1436	2490
ENSDARG00000004574	ENSDART00000020969	20	12	12	GAAAACCCACACGCCTCTTTTGGC	6	+	1689	2490
ENSDARG00000004574	ENSDART00000020969	20	12	12	AAAACCCACACGCCTCTTTTGGC	5	+	1690	2490
ENSDARG00000004574	ENSDART00000020969	20	13	13	AGAAAAGCCACTATTTGGGTATGT	6	+	1867	2490
ENSDARG00000004574	ENSDART00000020969	20	14	14	TCCGACGACGGAGATTTGTATGT	5	+	1988	2490
ENSDARG00000004574	ENSDART00000020969	20	14	14	GTAATCTCCGACGACGGAGATTTG	6	+	1982	2490
ENSDARG00000004574	ENSDART00000101262	20	2	1	GCAGACACACAACTGTCTGGTAA	5	+	154	2493
ENSDARG00000004574	ENSDART00000101262	20	5	4	TGCCCCAGAAAAGGATGATGTAGAG	7	+	579	2493
ENSDARG00000004574	ENSDART00000101262	20	5	4	GCCCAAATCTGGAGAAGCCGTTGTC	7	+	465	2493
ENSDARG00000004574	ENSDART00000101262	20	5	4	AGAGGCAGAGAGCGATGAAGAGGAT	7	+	600	2493
ENSDARG00000004574	ENSDART00000101262	20	5	4	CTAGGCCCAAATCTGGAGAAGCC	5	+	461	2493
ENSDARG00000004574	ENSDART00000101262	20	6	5	GTTTGCTTCCAAATGGCTTGGCT	5	+	698	2493
ENSDARG00000004574	ENSDART00000101262	20	7	6	GAAAACTTCTCCCCATGGGTGTTT	6	+	778	2493
ENSDARG00000004574	ENSDART00000101262	20	9	8	ACATCATCCTGAGCGATGGGACTCT	7	+	951	2493
ENSDARG00000004574	ENSDART00000101262	20	11	10	CTCCACAGATGCCTAGATTAGGTG	6	+	1283	2493
ENSDARG00000004574	ENSDART00000101262	20	12	11	AGAAGCTTCTGTCTCTGAAGATGGG	7	+	1436	2493
ENSDARG00000004574	ENSDART00000101262	20	14	13	GAAAACCCACACGCCTCTTTTGGC	6	+	1692	2493
ENSDARG00000004574	ENSDART00000101262	20	14	13	AAAACCCACACGCCTCTTTTGGC	5	+	1693	2493
ENSDARG00000004574	ENSDART00000101262	20	15	14	AGAAAAGCCACTATTTGGGTATGT	6	+	1870	2493
ENSDARG00000004574	ENSDART00000101262	20	16	15	TCCGACGACGGAGATTTGTATGT	5	+	1991	2493
ENSDARG00000004574	ENSDART00000101262	20	16	15	GTAATCTCCGACGACGGAGATTTG	6	+	1985	2493
ENSDARG00000004581	ENSDART00000012816	20	2	2	CTCACCAACACCATCATCTGAGGGT	7	-	87	2334
ENSDARG00000004581	ENSDART00000012816	20	2	2	CACCAACACCATCATCTGAGGGT	5	-	87	2334
ENSDARG00000004581	ENSDART00000012816	20	3	3	CTACGCTCCTGTGGTGGAGGTGGCT	7	-	272	2334
ENSDARG00000004581	ENSDART00000012816	20	3	3	TTACTACGCTCCTGTGGTGGAGGTG	7	-	275	2334
ENSDARG00000004581	ENSDART00000012816	20	3	3	TTACTACGCTCCTGTGGTGGAGGT	6	-	276	2334
ENSDARG00000004581	ENSDART00000012816	20	3	3	CTACGCTCCTGTGGTGGAGGTGGC	6	-	273	2334
ENSDARG00000004581	ENSDART00000012816	20	4	4	ACAGTCTCCCATCTCCTCTGCCTTC	7	-	394	2334
ENSDARG00000004581	ENSDART00000012816	20	5	5	GCCATCCTCCTCTGCTCTGCCTGC	6	-	480	2334
ENSDARG00000004581	ENSDART00000012816	20	5	5	TTAATCATCCTAACTGTGGCTTG	5	-	526	2334
ENSDARG00000004581	ENSDART00000012816	20	6	6	CTCTGCAACCTGCAGGAGTTTGT	5	-	587	2334
ENSDARG00000004581	ENSDART00000012816	20	6	6	AACATCTCCTTCGCCTGAGGAATGC	7	-	677	2334
ENSDARG00000004581	ENSDART00000012816	20	6	6	CTCTGCAACCTGCAGGAGTTTGTC	6	-	586	2334
ENSDARG00000004581	ENSDART00000012816	20	7	7	GTTCACACCCAATCCTGCAGCATAC	7	-	756	2334
ENSDARG00000004581	ENSDART00000012816	20	8	8	ACCCAAAGCTCCAAAGGTGTAGTAC	7	-	804	2334
ENSDARG00000004581	ENSDART00000012816	20	8	8	ACCCAAAGCTCCAAAGGTGTAGTA	6	-	805	2334
ENSDARG00000004581	ENSDART00000012816	20	11	11	CACCTCTTCCTCCATGTAGGTGTA	6	-	1109	2334
ENSDARG00000004581	ENSDART00000012816	20	15	15	ATCCACCCATCCTTGCTCTGCAGCT	7	-	1392	2334
ENSDARG00000004581	ENSDART00000012816	20	15	15	CACCCATCCTTGCTCTGCAGCTTTT	7	-	1389	2334
ENSDARG00000004581	ENSDART00000012816	20	17	17	CCCTCCTTAAAGCTTCTGTAGGC	5	-	1648	2334
ENSDARG00000004581	ENSDART00000012816	20	21	21	GGCTGCTCCGGCTGGGCTGGAGGT	6	-	2298	2334
ENSDARG00000004581	ENSDART00000012816	20	21	21	GCAGGCTGCTCCGGCTGGGCTGGA	6	-	2301	2334
ENSDARG00000004635	ENSDART00000043090	20	1	1	GTAGGCGCCTGCATTGCTTTGGT	5	+	433	2925
ENSDARG00000004635	ENSDART00000043090	20	1	1	ACATGCGTCAACGATGCAGAGGAG	6	+	565	2925
ENSDARG00000004635	ENSDART00000043090	20	1	1	ACAGCCTTCCAGGGGTGGTTGGCT	6	+	197	2925
ENSDARG00000004635	ENSDART00000043090	20	1	1	ACAGCCTTCCAGGGGTGGTTGGC	5	+	197	2925
ENSDARG00000004635	ENSDART00000043090	20	1	1	GTAGGCGCCTGCATTGCTTTGGTC	6	+	433	2925
ENSDARG00000004635	ENSDART00000043090	20	1	1	GTTTTCATCTCTGGTGGAAGTGGAG	7	+	537	2925
ENSDARG00000004635	ENSDART00000043090	20	1	1	TGCGTCAACGATGCAGAGGAGGAG	6	+	568	2925
ENSDARG00000004635	ENSDART00000043090	20	1	1	TTCACCAGAAGGGAGATGCATGT	5	+	674	2925
ENSDARG00000004635	ENSDART00000043090	20	1	1	AGCTCAACACAGAGGTGCGTATAA	6	+	365	2925
ENSDARG00000004635	ENSDART00000043090	20	3	3	CTATGCAGCCTGTGGTCGTGGAT	5	+	695	2925
ENSDARG00000004635	ENSDART00000043090	20	5	5	AAACTACACCTTCGAGGTCGAGGCT	7	+	1101	2925
ENSDARG00000004635	ENSDART00000043090	20	5	5	TACACCTTCGAGGTCGAGGCTGTG	6	+	1105	2925
ENSDARG00000004635	ENSDART00000043090	20	5	5	GTTGGCTACTCACCGCAGCAGAG	5	+	1030	2925
ENSDARG00000004635	ENSDART00000043090	20	5	5	ACAACCGTCAGCCTGGAGTGGAC	5	+	907	2925
ENSDARG00000004635	ENSDART00000043090	20	5	5	ACCCAACGCCTATTTGCAGCCGTC	6	+	1153	2925
ENSDARG00000004635	ENSDART00000043090	20	5	5	GCAAACTACACCTTCGAGGTCGAG	6	+	1099	2925
ENSDARG00000004635	ENSDART00000043090	20	5	5	GAACCCAACGCCTATTTGCAGCC	5	+	1151	2925
ENSDARG00000004635	ENSDART00000043090	20	5	5	CTCACCGCAGCAGAGTGGATTAA	5	+	1038	2925
ENSDARG00000004635	ENSDART00000043090	20	5	5	AACTACACCTTCGAGGTCGAGGCT	6	+	1102	2925
ENSDARG00000004635	ENSDART00000043090	20	5	5	CCCAACGCCTATTTGCAGCCGTC	5	+	1154	2925
ENSDARG00000004635	ENSDART00000043090	20	9	9	TTCGGCTTCATCATAGGGAGAAGGT	7	+	1660	2925
ENSDARG00000004635	ENSDART00000043090	20	11	11	GCCTCCTGCATTAAGATTGAGAG	5	+	1828	2925
ENSDARG00000004635	ENSDART00000043090	20	12	12	GACTCAAGCTGCCGGGGAAGAGGGA	7	+	1892	2925
ENSDARG00000004635	ENSDART00000043090	20	12	12	TTAAAACGCTGAAAGTAGGCTAC	5	+	1931	2925
ENSDARG00000004635	ENSDART00000043090	20	14	14	GACTTCGGCCTGTCCAGAGTGATTG	7	+	2266	2925
ENSDARG00000004635	ENSDART00000043090	20	15	15	CACATCAGCGAGTGATGTGTGGAG	6	+	2379	2925
ENSDARG00000004635	ENSDART00000043090	20	15	15	AAATTCACATCAGCGAGTGATGT	5	+	2374	2925
ENSDARG00000004635	ENSDART00000043090	20	17	17	GACAACTTCACAGCCGCCGGCTAC	6	+	2764	2925
ENSDARG00000004635	ENSDART00000102781	20	1	1	ATCGTCTCCTCCAAGCGGGGTAA	5	+	57	2913
ENSDARG00000004635	ENSDART00000102781	20	2	2	GTAGGCGCCTGCATTGCTTTGGT	5	+	478	2913
ENSDARG00000004635	ENSDART00000102781	20	2	2	GTAGGCGCCTGCATTGCTTTGGTC	6	+	478	2913
ENSDARG00000004635	ENSDART00000102781	20	2	2	AGCTCAACACAGAGGTGCGTATAA	6	+	410	2913
ENSDARG00000004635	ENSDART00000102781	20	2	2	ACATGCGTCAACGATGCAGAGGAG	6	+	610	2913
ENSDARG00000004635	ENSDART00000102781	20	2	2	ACAGCCTTCCAGGGGTGGTTGGCT	6	+	242	2913
ENSDARG00000004635	ENSDART00000102781	20	2	2	ACAGCCTTCCAGGGGTGGTTGGC	5	+	242	2913
ENSDARG00000004635	ENSDART00000102781	20	2	2	GTTTTCATCTCTGGTGGAAGTGGAG	7	+	582	2913
ENSDARG00000004635	ENSDART00000102781	20	2	2	TGCGTCAACGATGCAGAGGAGGAG	6	+	613	2913
ENSDARG00000004635	ENSDART00000102781	20	2	2	TTCACCAGAAGGGAGATGCATGT	5	+	719	2913
ENSDARG00000004635	ENSDART00000102781	20	3	3	CTATGCAGCCTGTGGTCGTGGAT	5	+	738	2913
ENSDARG00000004635	ENSDART00000102781	20	4	4	GTTGGCTACTCACCGCAGCAGAG	5	+	1069	2913
ENSDARG00000004635	ENSDART00000102781	20	4	4	TACACCTTCGAGGTCGAGGCTGTG	6	+	1144	2913
ENSDARG00000004635	ENSDART00000102781	20	4	4	GCAAACTACACCTTCGAGGTCGAG	6	+	1138	2913
ENSDARG00000004635	ENSDART00000102781	20	4	4	GAACCCAACGCCTATTTGCAGCC	5	+	1190	2913
ENSDARG00000004635	ENSDART00000102781	20	4	4	ACCCAACGCCTATTTGCAGCCGTC	6	+	1192	2913
ENSDARG00000004635	ENSDART00000102781	20	4	4	AAACTACACCTTCGAGGTCGAGGCT	7	+	1140	2913
ENSDARG00000004635	ENSDART00000102781	20	4	4	AACTACACCTTCGAGGTCGAGGCT	6	+	1141	2913
ENSDARG00000004635	ENSDART00000102781	20	4	4	ACAACCGTCAGCCTGGAGTGGAC	5	+	946	2913
ENSDARG00000004635	ENSDART00000102781	20	4	4	CCCAACGCCTATTTGCAGCCGTC	5	+	1193	2913
ENSDARG00000004635	ENSDART00000102781	20	4	4	CTCACCGCAGCAGAGTGGATTAA	5	+	1077	2913
ENSDARG00000004635	ENSDART00000102781	20	7	7	TTCGGCTTCATCATAGGGAGAAGGT	7	+	1633	2913
ENSDARG00000004635	ENSDART00000102781	20	10	10	GCCTCCTGCATTAAGATTGAGAG	5	+	1810	2913
ENSDARG00000004635	ENSDART00000102781	20	11	11	GACTCAAGCTGCCGGGGAAGAGGGA	7	+	1874	2913
ENSDARG00000004635	ENSDART00000102781	20	11	11	TTAAAACGCTGAAAGTAGGCTAC	5	+	1913	2913
ENSDARG00000004635	ENSDART00000102781	20	13	13	GACTTCGGCCTGTCCAGAGTGATTG	7	+	2248	2913
ENSDARG00000004635	ENSDART00000102781	20	14	14	AAATTCACATCAGCGAGTGATGT	5	+	2356	2913
ENSDARG00000004635	ENSDART00000102781	20	14	14	CACATCAGCGAGTGATGTGTGGAG	6	+	2361	2913
ENSDARG00000004635	ENSDART00000102781	20	17	17	GACAACTTCACAGCCGCCGGCTAC	6	+	2752	2913
ENSDARG00000004635	ENSDART00000102783	20	2	2	ATCGTCTCCTCCAAGCGGGGTAA	5	+	117	2655
ENSDARG00000004635	ENSDART00000102783	20	3	3	GTAGGCGCCTGCATTGCTTTGGT	5	+	538	2655
ENSDARG00000004635	ENSDART00000102783	20	3	3	GTAGGCGCCTGCATTGCTTTGGTC	6	+	538	2655
ENSDARG00000004635	ENSDART00000102783	20	3	3	AGCTCAACACAGAGGTGCGTATAA	6	+	470	2655
ENSDARG00000004635	ENSDART00000102783	20	3	3	ACATGCGTCAACGATGCAGAGGAG	6	+	670	2655
ENSDARG00000004635	ENSDART00000102783	20	3	3	ACAGCCTTCCAGGGGTGGTTGGCT	6	+	302	2655
ENSDARG00000004635	ENSDART00000102783	20	3	3	ACAGCCTTCCAGGGGTGGTTGGC	5	+	302	2655
ENSDARG00000004635	ENSDART00000102783	20	3	3	GTTTTCATCTCTGGTGGAAGTGGAG	7	+	642	2655
ENSDARG00000004635	ENSDART00000102783	20	3	3	TGCGTCAACGATGCAGAGGAGGAG	6	+	673	2655
ENSDARG00000004635	ENSDART00000102783	20	3	3	TTCACCAGAAGGGAGATGCATGT	5	+	779	2655
ENSDARG00000004635	ENSDART00000102783	20	4	4	CTATGCAGCCTGTGGTCGTGGAT	5	+	798	2655
ENSDARG00000004635	ENSDART00000102783	20	5	5	GTTGGCTACTCACCGCAGCAGAG	5	+	1129	2655
ENSDARG00000004635	ENSDART00000102783	20	5	5	TACACCTTCGAGGTCGAGGCTGTG	6	+	1204	2655
ENSDARG00000004635	ENSDART00000102783	20	5	5	GCAAACTACACCTTCGAGGTCGAG	6	+	1198	2655
ENSDARG00000004635	ENSDART00000102783	20	5	5	GAACCCAACGCCTATTTGCAGCC	5	+	1250	2655
ENSDARG00000004635	ENSDART00000102783	20	5	5	AAACTACACCTTCGAGGTCGAGGCT	7	+	1200	2655
ENSDARG00000004635	ENSDART00000102783	20	5	5	CTCACCGCAGCAGAGTGGATTAA	5	+	1137	2655
ENSDARG00000004635	ENSDART00000102783	20	5	5	CCCAACGCCTATTTGCAGCCGTC	5	+	1253	2655
ENSDARG00000004635	ENSDART00000102783	20	5	5	AACTACACCTTCGAGGTCGAGGCT	6	+	1201	2655
ENSDARG00000004635	ENSDART00000102783	20	5	5	ACCCAACGCCTATTTGCAGCCGTC	6	+	1252	2655
ENSDARG00000004635	ENSDART00000102783	20	5	5	ACAACCGTCAGCCTGGAGTGGAC	5	+	1006	2655
ENSDARG00000004635	ENSDART00000102783	20	9	9	TTCGGCTTCATCATAGGGAGAAGGT	7	+	1681	2655
ENSDARG00000004635	ENSDART00000102783	20	12	12	GCCTCCTGCATTAAGATTGAGAG	5	+	1846	2655
ENSDARG00000004635	ENSDART00000102783	20	13	13	GACTCAAGCTGCCGGGGAAGAGGGA	7	+	1910	2655
ENSDARG00000004635	ENSDART00000102783	20	13	13	TTAAAACGCTGAAAGTAGGCTAC	5	+	1949	2655
ENSDARG00000004635	ENSDART00000102783	20	15	15	GACTTCGGCCTGTCCAGAGTGATTG	7	+	2284	2655
ENSDARG00000004635	ENSDART00000102783	20	16	16	AAATTCACATCAGCGAGTGATGT	5	+	2395	2655
ENSDARG00000004635	ENSDART00000102783	20	16	16	CACATCAGCGAGTGATGTGTGGAG	6	+	2400	2655
ENSDARG00000004635	ENSDART00000102788	20	2	2	ATCGTCTCCTCCAAGCGGGGTAA	5	+	150	3048
ENSDARG00000004635	ENSDART00000102788	20	3	3	GTAGGCGCCTGCATTGCTTTGGT	5	+	571	3048
ENSDARG00000004635	ENSDART00000102788	20	3	3	GTAGGCGCCTGCATTGCTTTGGTC	6	+	571	3048
ENSDARG00000004635	ENSDART00000102788	20	3	3	AGCTCAACACAGAGGTGCGTATAA	6	+	503	3048
ENSDARG00000004635	ENSDART00000102788	20	3	3	ACATGCGTCAACGATGCAGAGGAG	6	+	703	3048
ENSDARG00000004635	ENSDART00000102788	20	3	3	ACAGCCTTCCAGGGGTGGTTGGCT	6	+	335	3048
ENSDARG00000004635	ENSDART00000102788	20	3	3	ACAGCCTTCCAGGGGTGGTTGGC	5	+	335	3048
ENSDARG00000004635	ENSDART00000102788	20	3	3	GTTTTCATCTCTGGTGGAAGTGGAG	7	+	675	3048
ENSDARG00000004635	ENSDART00000102788	20	3	3	TGCGTCAACGATGCAGAGGAGGAG	6	+	706	3048
ENSDARG00000004635	ENSDART00000102788	20	3	3	TTCACCAGAAGGGAGATGCATGT	5	+	812	3048
ENSDARG00000004635	ENSDART00000102788	20	4	4	CTATGCAGCCTGTGGTCGTGGAT	5	+	831	3048
ENSDARG00000004635	ENSDART00000102788	20	5	5	GTTGGCTACTCACCGCAGCAGAG	5	+	1162	3048
ENSDARG00000004635	ENSDART00000102788	20	5	5	TACACCTTCGAGGTCGAGGCTGTG	6	+	1237	3048
ENSDARG00000004635	ENSDART00000102788	20	5	5	GCAAACTACACCTTCGAGGTCGAG	6	+	1231	3048
ENSDARG00000004635	ENSDART00000102788	20	5	5	GAACCCAACGCCTATTTGCAGCC	5	+	1283	3048
ENSDARG00000004635	ENSDART00000102788	20	5	5	AAACTACACCTTCGAGGTCGAGGCT	7	+	1233	3048
ENSDARG00000004635	ENSDART00000102788	20	5	5	CCCAACGCCTATTTGCAGCCGTC	5	+	1286	3048
ENSDARG00000004635	ENSDART00000102788	20	5	5	CTCACCGCAGCAGAGTGGATTAA	5	+	1170	3048
ENSDARG00000004635	ENSDART00000102788	20	5	5	AACTACACCTTCGAGGTCGAGGCT	6	+	1234	3048
ENSDARG00000004635	ENSDART00000102788	20	5	5	ACAACCGTCAGCCTGGAGTGGAC	5	+	1039	3048
ENSDARG00000004635	ENSDART00000102788	20	5	5	ACCCAACGCCTATTTGCAGCCGTC	6	+	1285	3048
ENSDARG00000004635	ENSDART00000102788	20	9	9	TTCGGCTTCATCATAGGGAGAAGGT	7	+	1783	3048
ENSDARG00000004635	ENSDART00000102788	20	11	11	GCCTCCTGCATTAAGATTGAGAG	5	+	1951	3048
ENSDARG00000004635	ENSDART00000102788	20	12	12	TTAAAACGCTGAAAGTAGGCTAC	5	+	2054	3048
ENSDARG00000004635	ENSDART00000102788	20	12	12	GACTCAAGCTGCCGGGGAAGAGGGA	7	+	2015	3048
ENSDARG00000004635	ENSDART00000102788	20	14	14	GACTTCGGCCTGTCCAGAGTGATTG	7	+	2389	3048
ENSDARG00000004635	ENSDART00000102788	20	15	15	AAATTCACATCAGCGAGTGATGT	5	+	2497	3048
ENSDARG00000004635	ENSDART00000102788	20	15	15	CACATCAGCGAGTGATGTGTGGAG	6	+	2502	3048
ENSDARG00000004635	ENSDART00000102788	20	17	17	GACAACTTCACAGCCGCCGGCTAC	6	+	2887	3048
ENSDARG00000004697	ENSDART00000002554	20	4	4	ACCGGCGGCTGAGAGGGGGACGAG	6	-	54	1353
ENSDARG00000004697	ENSDART00000002554	20	4	4	AGCCCATGCTGGGTGTGGAGGGC	5	-	225	1353
ENSDARG00000004697	ENSDART00000002554	20	4	4	GTTAAAGCCCATGCTGGGTGTGGAG	7	-	228	1353
ENSDARG00000004697	ENSDART00000002554	20	5	5	CTCCACAGATGGCACAGATGTGTTT	7	-	379	1353
ENSDARG00000004697	ENSDART00000002554	20	6	6	GGCCAAGCACTTCTGGTAGCGGCA	6	-	553	1353
ENSDARG00000004697	ENSDART00000002554	20	11	11	GCCTCCACCTCCAGTGAGTTTGAC	6	-	1125	1353
ENSDARG00000004697	ENSDART00000002554	20	11	11	TGCCTCCACCTCCAGTGAGTTTGAC	7	-	1125	1353
ENSDARG00000004697	ENSDART00000002554	20	12	12	TGCTCCAGACACTTGAGGCCGAT	5	-	1258	1353
ENSDARG00000004697	ENSDART00000002554	20	12	12	AGACGCAGCAGCAGCTTAGCAAAC	6	-	1218	1353
ENSDARG00000004697	ENSDART00000080473	20	2	2	GGCCAAGCACTTCTGGTAGCGGCA	6	-	175	960
ENSDARG00000004697	ENSDART00000080473	20	8	8	GCCTCCACCTCCAGTGAGTTTGAC	6	-	753	960
ENSDARG00000004697	ENSDART00000080473	20	8	8	TGCCTCCACCTCCAGTGAGTTTGAC	7	-	753	960
ENSDARG00000004697	ENSDART00000080473	20	9	9	AGACGCAGCAGCAGCTTAGCAAAC	6	-	846	960
ENSDARG00000004697	ENSDART00000080473	20	9	9	TGCTCCAGACACTTGAGGCCGAT	5	-	886	960
ENSDARG00000004697	ENSDART00000102075	20	1	1	ACCGGCGGCTGAGAGGGGGACGAG	6	-	63	1311
ENSDARG00000004697	ENSDART00000102075	20	2	2	GTTAAAGCCCATGCTGGGTGTGGAG	7	-	186	1311
ENSDARG00000004697	ENSDART00000102075	20	2	2	AGCCCATGCTGGGTGTGGAGGGC	5	-	183	1311
ENSDARG00000004697	ENSDART00000102075	20	3	3	CTCCACAGATGGCACAGATGTGTTT	7	-	337	1311
ENSDARG00000004697	ENSDART00000102075	20	4	4	GGCCAAGCACTTCTGGTAGCGGCA	6	-	511	1311
ENSDARG00000004697	ENSDART00000102075	20	9	9	GCCTCCACCTCCAGTGAGTTTGAC	6	-	1083	1311
ENSDARG00000004697	ENSDART00000102075	20	9	9	TGCCTCCACCTCCAGTGAGTTTGAC	7	-	1083	1311
ENSDARG00000004697	ENSDART00000102075	20	10	10	AGACGCAGCAGCAGCTTAGCAAAC	6	-	1176	1311
ENSDARG00000004697	ENSDART00000102075	20	10	10	TGCTCCAGACACTTGAGGCCGAT	5	-	1216	1311
ENSDARG00000004721	ENSDART00000028084	20	1	1	AGAGTCAGCAGGACGTGGAGCTGCT	7	+	68	1668
ENSDARG00000004721	ENSDART00000028084	20	1	1	GCCTTCATCATGCAGCGCAGCGTAG	7	+	127	1668
ENSDARG00000004721	ENSDART00000028084	20	6	6	TTCAGCTACGACCCCTCTGAGGAC	6	+	685	1668
ENSDARG00000004721	ENSDART00000028084	20	10	10	GCAAACAGCGGACAGGATGAGCT	5	+	1090	1668
ENSDARG00000004721	ENSDART00000028084	20	11	11	GAATACAACTTCGTGTCGCGGCA	5	+	1207	1668
ENSDARG00000004721	ENSDART00000028084	20	11	11	TACAACTTCGTGTCGCGGCAGAG	5	+	1210	1668
ENSDARG00000004721	ENSDART00000028084	20	11	11	AAAATCTGCCTGCTGTGTTTGCA	5	+	1339	1668
ENSDARG00000004735	ENSDART00000006954	20	1	1	CTCACCGTCTTCAACGTCGATTTT	6	-	430	2388
ENSDARG00000004735	ENSDART00000006954	20	1	1	CCCGGCGTCGTCGTCGTCGTCGTC	6	-	349	2388
ENSDARG00000004735	ENSDART00000006954	20	1	1	CTCCCCGGCGTCGTCGTCGTCGTC	6	-	352	2388
ENSDARG00000004735	ENSDART00000006954	20	1	1	GGCCTCTGCGTCGAGCGCGGCCTGC	7	-	117	2388
ENSDARG00000004735	ENSDART00000006954	20	1	1	ATCTTCATCGTCTAAGGCTTTGTCT	7	-	381	2388
ENSDARG00000004735	ENSDART00000006954	20	1	1	ATCTTCATCGTCTAAGGCTTTGTC	6	-	382	2388
ENSDARG00000004735	ENSDART00000006954	20	1	1	TTCCTCCCCGGCGTCGTCGTCGTC	6	-	355	2388
ENSDARG00000004735	ENSDART00000006954	20	1	1	TTCTTCCTCTTGGGCCTGGGCCTCT	7	-	135	2388
ENSDARG00000004735	ENSDART00000006954	20	1	1	ACCGTCTTCAACGTCGATTTTGTC	6	-	427	2388
ENSDARG00000004735	ENSDART00000006954	20	1	1	TTCGTCGTCCTGACCGGCGGCTTC	6	-	304	2388
ENSDARG00000004735	ENSDART00000006954	20	1	1	ATCATCTTCATCGTCTAAGGCTTT	6	-	385	2388
ENSDARG00000004735	ENSDART00000006954	20	3	3	TCCAAAGGCGGCTGAGGAGACTTG	6	-	567	2388
ENSDARG00000004735	ENSDART00000006954	20	3	3	CACTTCCTCCAAAGGCGGCTGAG	5	-	575	2388
ENSDARG00000004735	ENSDART00000006954	20	3	3	CACTTCCTCCAAAGGCGGCTGAGGA	7	-	573	2388
ENSDARG00000004735	ENSDART00000006954	20	3	3	AAAGGCGGCTGAGGAGACTTGGTC	6	-	564	2388
ENSDARG00000004735	ENSDART00000006954	20	6	6	ATCAAAGCCCTCCCCGTAGTCTTC	6	-	940	2388
ENSDARG00000004735	ENSDART00000006954	20	7	7	ATCTGCTGCATAAAGGTGAAGTC	5	-	1174	2388
ENSDARG00000004735	ENSDART00000006954	20	8	8	CTCCAAGACGGTGTTGGTGCTGAG	6	-	1342	2388
ENSDARG00000004735	ENSDART00000006954	20	9	9	CACCACGGCTTTGCGCTGGAAAC	5	-	1553	2388
ENSDARG00000004735	ENSDART00000006954	20	9	9	ACAGACACATCTTCCTTCTTTGGGC	7	-	1522	2388
ENSDARG00000004735	ENSDART00000006954	20	9	9	AGACACATCTTCCTTCTTTGGGC	5	-	1522	2388
ENSDARG00000004735	ENSDART00000006954	20	9	9	CACATCTTCCTTCTTTGGGCTGCT	6	-	1518	2388
ENSDARG00000004735	ENSDART00000006954	20	9	9	GACCACCACGGCTTTGCGCTGGA	5	-	1556	2388
ENSDARG00000004735	ENSDART00000006954	20	11	11	GGCTCATTCCACCACCTCTGCTGGC	7	-	2143	2388
ENSDARG00000004735	ENSDART00000006954	20	11	11	TCCACCAGACCCTCCTCTGTTGTA	6	-	2068	2388
ENSDARG00000004735	ENSDART00000006954	20	11	11	CAAATCCGCTCACACGAGGTGGTG	6	-	1967	2388
ENSDARG00000004735	ENSDART00000006954	20	12	12	ATCCTCCACGATTCTGCTGGTGGC	6	-	2270	2388
ENSDARG00000004735	ENSDART00000006954	20	12	12	GTTGCCAGCTCTGGTTGAAGGCTTG	7	-	2320	2388
ENSDARG00000004877	ENSDART00000002777	20	4	4	GACTCCGCCTTTTTCTGGGAGGAG	6	+	364	4206
ENSDARG00000004877	ENSDART00000002777	20	5	5	ACCTCAAACTCGCAGACTTTGGC	5	+	647	4206
ENSDARG00000004877	ENSDART00000002777	20	5	5	CAAACCAGACAACATGCTGCTGGA	6	+	612	4206
ENSDARG00000004877	ENSDART00000002777	20	5	5	CTATACGGCAGAAGTGGTGCTGGC	6	+	546	4206
ENSDARG00000004877	ENSDART00000002777	20	5	5	AAACCAGACAACATGCTGCTGGA	5	+	613	4206
ENSDARG00000004877	ENSDART00000002777	20	5	5	CACCTCAAACTCGCAGACTTTGGC	6	+	646	4206
ENSDARG00000004877	ENSDART00000002777	20	7	7	GCCAAAGACCTCATCTGTGCCTTT	6	+	940	4206
ENSDARG00000004877	ENSDART00000002777	20	7	7	TGCCAAAGACCTCATCTGTGCCTTT	7	+	939	4206
ENSDARG00000004877	ENSDART00000002777	20	9	9	ACCAGCTACCATTTGTGGGTTTC	5	+	1187	4206
ENSDARG00000004877	ENSDART00000002777	20	10	10	GTTAACACAACAAAATAAGTGTTC	6	+	1233	4206
ENSDARG00000004877	ENSDART00000002777	20	11	11	GTAGTCTAACGACCTGGAGAAGAG	6	+	1296	4206
ENSDARG00000004877	ENSDART00000002777	20	13	13	ACCGACAGAAAACGGCTGCTGGA	5	+	1543	4206
ENSDARG00000004877	ENSDART00000002777	20	15	15	GTCCTCAGCTGGAGGAGGTGAGTGC	7	+	1658	4206
ENSDARG00000004877	ENSDART00000002777	20	15	15	GCAGACCTCGCTAGAGCTGGAGAA	6	+	1845	4206
ENSDARG00000004877	ENSDART00000002777	20	15	15	ACAGTCCCAGCAGCTGGAGCTTTC	6	+	1746	4206
ENSDARG00000004877	ENSDART00000002777	20	17	17	CTCAAAGCAGTTCAGCAGAGTCT	5	+	2056	4206
ENSDARG00000004877	ENSDART00000002777	20	17	17	TTCAGCAGAGTCTGGAGCAGGAGGA	7	+	2066	4206
ENSDARG00000004877	ENSDART00000002777	20	18	18	GAAAACAGACTGATGCAGCTGGA	5	+	2224	4206
ENSDARG00000004877	ENSDART00000002777	20	19	19	GAACTCAACCATCTGCTGGAGCT	5	+	2461	4206
ENSDARG00000004877	ENSDART00000002777	20	20	20	AAAAACAGCTGAAGGAGATGAAGGA	7	+	2540	4206
ENSDARG00000004877	ENSDART00000002777	20	22	22	GTTAGCGTCTCAGTTGGAGGTGAG	6	+	2703	4206
ENSDARG00000004877	ENSDART00000002777	20	24	24	AGAAGCAGATACAGGTGGAGAAAAC	7	+	3038	4206
ENSDARG00000004877	ENSDART00000002777	20	25	25	GACATCCGCAGGAAGGAGAAGGA	5	+	3142	4206
ENSDARG00000004877	ENSDART00000002777	20	25	25	GAAATCAACGACATGCAGGCTGT	5	+	3238	4206
ENSDARG00000004877	ENSDART00000002777	20	25	25	ACAGACATCCGCAGGAAGGAGAA	5	+	3139	4206
ENSDARG00000004877	ENSDART00000002777	20	27	27	AACACCAAACGGTTTGGATGGGAT	6	+	3475	4206
ENSDARG00000004877	ENSDART00000002777	20	27	27	GCCAAAAACACCAAACGGTTTGGAT	7	+	3469	4206
ENSDARG00000004877	ENSDART00000002777	20	27	27	ACACCAAACGGTTTGGATGGGAT	5	+	3476	4206
ENSDARG00000004877	ENSDART00000002777	20	27	27	CAAAAACACCAAACGGTTTGGAT	5	+	3471	4206
ENSDARG00000004877	ENSDART00000002777	20	30	30	GTCTTCAGACCTCCGCCGGCTCT	5	+	3838	4206
ENSDARG00000004877	ENSDART00000002777	20	30	30	CACTTCCCCTCGAGCTGCGAGGTC	6	+	3793	4206
ENSDARG00000004877	ENSDART00000002777	20	31	31	GTCCACAGCGAAAGAGATGCTGCT	6	+	3951	4206
ENSDARG00000004877	ENSDART00000002777	20	31	31	GGCAAACTCCACAGAGGAGCAGAA	6	+	3978	4206
ENSDARG00000004877	ENSDART00000002777	20	31	31	GCAAACTCCACAGAGGAGCAGAA	5	+	3979	4206
ENSDARG00000004877	ENSDART00000002777	20	31	31	AAACTCCACAGAGGAGCAGAAGAA	6	+	3981	4206
ENSDARG00000004877	ENSDART00000002777	20	31	31	CTCCACAGAGGAGCAGAAGAAGTG	6	+	3984	4206
ENSDARG00000004877	ENSDART00000002777	20	31	31	AACTCCACAGAGGAGCAGAAGAA	5	+	3982	4206
ENSDARG00000004877	ENSDART00000002777	20	31	31	CCCTCCAGCAAGAACAGGTGAGGAG	7	+	4198	4206
ENSDARG00000005002	ENSDART00000035827	20	2	1	GCAGACACAAACTGGCCGACGGC	5	-	163	2082
ENSDARG00000005002	ENSDART00000035827	20	3	2	CTACCATTCTGGAGAGTCTGAGCT	6	-	252	2082
ENSDARG00000005002	ENSDART00000035827	20	3	2	TGCACCTACCATTCTGGAGAGTCT	6	-	257	2082
ENSDARG00000005002	ENSDART00000035827	20	3	2	TGCCCAAGACTGGAGCTTTGGAA	5	-	195	2082
ENSDARG00000005002	ENSDART00000035827	20	3	2	CACTGCCCAAGACTGGAGCTTTG	5	-	198	2082
ENSDARG00000005002	ENSDART00000035827	20	4	3	TTCGACCTCGCGTCAAGTGTTTGCT	7	-	361	2082
ENSDARG00000005002	ENSDART00000035827	20	7	6	TTCATCCTCTGCAGCAGTCTGAGAG	7	-	626	2082
ENSDARG00000005002	ENSDART00000035827	20	7	6	ACCAAACTCCAACATGTGGGCGAA	6	-	574	2082
ENSDARG00000005002	ENSDART00000035827	20	8	7	AGCCGCCACGAGCAGAGCTGGGGGA	7	-	693	2082
ENSDARG00000005002	ENSDART00000035827	20	9	8	CTCAAACTCTGTCAGTCTGAGCA	5	-	788	2082
ENSDARG00000005002	ENSDART00000035827	20	9	8	ACCTGCTGCATCTTGACTTTTTT	5	-	901	2082
ENSDARG00000005002	ENSDART00000035827	20	9	8	TCCTCAAACTCTGTCAGTCTGAGCA	7	-	788	2082
ENSDARG00000005002	ENSDART00000035827	20	13	12	AGCTCCCCACTGTCTGATTTTTCT	6	-	1350	2082
ENSDARG00000005002	ENSDART00000035827	20	14	13	GTTTCATCCACAGCTCTGTCTTC	5	-	1440	2082
ENSDARG00000005002	ENSDART00000035827	20	15	14	ACACTCACCTTCTCCTTATAGGTC	6	-	1530	2082
ENSDARG00000005002	ENSDART00000035827	20	16	15	CACATCCTCGGCTTGTTGGGTGC	5	-	1694	2082
ENSDARG00000005002	ENSDART00000035827	20	16	15	ATCCTCGGCTTGTTGGGTGCTGCT	6	-	1690	2082
ENSDARG00000005002	ENSDART00000035827	20	18	17	TCCAGCACAGGGGGAGGGGTGGGGG	7	-	1928	2082
ENSDARG00000005002	ENSDART00000035827	20	18	17	TCCAGCACAGGGGGAGGGGTGGGG	6	-	1929	2082
ENSDARG00000005002	ENSDART00000035827	20	18	17	GGCAACATCATGGTCATGCTGGGAG	7	-	1877	2082
ENSDARG00000005002	ENSDART00000035827	20	18	17	CTCCTCCTCTTCCTCGGCTGGTTC	6	-	1975	2082
ENSDARG00000005002	ENSDART00000103637	20	1	1	GCAGACACAAACTGGCCGACGGC	5	-	163	1776
ENSDARG00000005002	ENSDART00000103637	20	2	2	TGCACCTACCATTCTGGAGAGTCT	6	-	257	1776
ENSDARG00000005002	ENSDART00000103637	20	2	2	TGCCCAAGACTGGAGCTTTGGAA	5	-	195	1776
ENSDARG00000005002	ENSDART00000103637	20	2	2	CACTGCCCAAGACTGGAGCTTTG	5	-	198	1776
ENSDARG00000005002	ENSDART00000103637	20	2	2	CTACCATTCTGGAGAGTCTGAGCT	6	-	252	1776
ENSDARG00000005002	ENSDART00000103637	20	3	3	TTCGACCTCGCGTCAAGTGTTTGCT	7	-	361	1776
ENSDARG00000005002	ENSDART00000103637	20	6	6	ACCAAACTCCAACATGTGGGCGAA	6	-	574	1776
ENSDARG00000005002	ENSDART00000103637	20	6	6	TTCATCCTCTGCAGCAGTCTGAGAG	7	-	626	1776
ENSDARG00000005002	ENSDART00000103637	20	7	7	AGCCGCCACGAGCAGAGCTGGGGGA	7	-	693	1776
ENSDARG00000005002	ENSDART00000103637	20	8	8	CTCAAACTCTGTCAGTCTGAGCA	5	-	788	1776
ENSDARG00000005002	ENSDART00000103637	20	8	8	TCCTCAAACTCTGTCAGTCTGAGCA	7	-	788	1776
ENSDARG00000005002	ENSDART00000103637	20	8	8	ACCTGCTGCATCTTGACTTTTTT	5	-	901	1776
ENSDARG00000005002	ENSDART00000103637	20	13	13	AGCTCCCCACTGTCTGATTTTTCT	6	-	1317	1776
ENSDARG00000005002	ENSDART00000103637	20	14	14	GTTTCATCCACAGCTCTGTCTTC	5	-	1407	1776
ENSDARG00000005002	ENSDART00000103637	20	15	15	ACACTCACCTTCTCCTTATAGGTC	6	-	1497	1776
ENSDARG00000005002	ENSDART00000103637	20	16	16	CACATCCTCGGCTTGTTGGGTGC	5	-	1661	1776
ENSDARG00000005002	ENSDART00000103637	20	16	16	ATCCTCGGCTTGTTGGGTGCTGCT	6	-	1657	1776
ENSDARG00000005394	ENSDART00000031712	20	2	2	TACTGCCTCCAATAGGTATGGTAG	6	-	104	2490
ENSDARG00000005394	ENSDART00000031712	20	3	3	TACTGCCTCCAATAGGTATGGTAG	6	-	242	2490
ENSDARG00000005394	ENSDART00000031712	20	4	4	ACCTTCTTCTGCTGTTGCTGAGGT	6	-	387	2490
ENSDARG00000005394	ENSDART00000031712	20	4	4	ACCTTCTTCTGCTGTTGCTGAGGTA	7	-	386	2490
ENSDARG00000005394	ENSDART00000031712	20	4	4	CTCACCGCAGGCGACGGGAGGCGGC	7	-	552	2490
ENSDARG00000005394	ENSDART00000031712	20	10	10	TGCACCGACAAAAAGAGGATGCT	5	-	1280	2490
ENSDARG00000005394	ENSDART00000031712	20	11	11	CTCCACAGCAGATGGTGCAGAAGGA	7	-	1369	2490
ENSDARG00000005394	ENSDART00000031712	20	11	11	CCCTCCACAGCAGATGGTGCAGAA	6	-	1372	2490
ENSDARG00000005394	ENSDART00000031712	20	11	11	GTCTCCCTCCACAGCAGATGGTGCA	7	-	1375	2490
ENSDARG00000005394	ENSDART00000031712	20	11	11	CACTCCAGAAAGCTGTTCTGAAGAC	7	-	1313	2490
ENSDARG00000005394	ENSDART00000031712	20	11	11	TCCCTCCACAGCAGATGGTGCAGAA	7	-	1372	2490
ENSDARG00000005394	ENSDART00000031712	20	12	12	GTCTCAGCAGGCCGAAGACGCTGCG	7	-	1531	2490
ENSDARG00000005394	ENSDART00000031712	20	12	12	CTCTGCGTCTCAGCAGGCCGAAGAC	7	-	1537	2490
ENSDARG00000005394	ENSDART00000031712	20	14	14	GCACCATACCAACAGTGATGGAGTC	7	-	1768	2490
ENSDARG00000005394	ENSDART00000031712	20	15	15	CCCCCACTCCTGAATCTGCAGAG	5	-	1841	2490
ENSDARG00000005394	ENSDART00000031712	20	15	15	TTCCTAGCAGGGTTGACGATGGA	5	-	1906	2490
ENSDARG00000005394	ENSDART00000031712	20	15	15	GGCCCCCACTCCTGAATCTGCAGAG	7	-	1841	2490
ENSDARG00000005394	ENSDART00000031712	20	15	15	AAACAAGCCTTTCCTAGCAGGGTTG	7	-	1914	2490
ENSDARG00000005394	ENSDART00000031712	20	16	16	TTAGGCCGCGCTTCGTGAAGCAGCC	7	-	1973	2490
ENSDARG00000005394	ENSDART00000031712	20	16	16	ACACACCTCCAGAAAGCGTGAGAT	6	-	2071	2490
ENSDARG00000005394	ENSDART00000031712	20	16	16	CACACCTCCAGAAAGCGTGAGAT	5	-	2071	2490
ENSDARG00000005394	ENSDART00000031712	20	16	16	ACAGCCAGAAAAACGGGCGGTCGTC	7	-	2005	2490
ENSDARG00000005394	ENSDART00000100320	20	1	1	TCCCTCTTAGGTCGCTGTGTGTGT	6	-	24	2556
ENSDARG00000005394	ENSDART00000100320	20	4	4	TACTGCCTCCAATAGGTATGGTAG	6	-	170	2556
ENSDARG00000005394	ENSDART00000100320	20	5	5	TACTGCCTCCAATAGGTATGGTAG	6	-	308	2556
ENSDARG00000005394	ENSDART00000100320	20	6	6	ACCTTCTTCTGCTGTTGCTGAGGT	6	-	453	2556
ENSDARG00000005394	ENSDART00000100320	20	6	6	ACCTTCTTCTGCTGTTGCTGAGGTA	7	-	452	2556
ENSDARG00000005394	ENSDART00000100320	20	6	6	CTCACCGCAGGCGACGGGAGGCGGC	7	-	618	2556
ENSDARG00000005394	ENSDART00000100320	20	12	12	TGCACCGACAAAAAGAGGATGCT	5	-	1346	2556
ENSDARG00000005394	ENSDART00000100320	20	13	13	GTCTCCCTCCACAGCAGATGGTGCA	7	-	1441	2556
ENSDARG00000005394	ENSDART00000100320	20	13	13	CTCCACAGCAGATGGTGCAGAAGGA	7	-	1435	2556
ENSDARG00000005394	ENSDART00000100320	20	13	13	CCCTCCACAGCAGATGGTGCAGAA	6	-	1438	2556
ENSDARG00000005394	ENSDART00000100320	20	13	13	CACTCCAGAAAGCTGTTCTGAAGAC	7	-	1379	2556
ENSDARG00000005394	ENSDART00000100320	20	13	13	TCCCTCCACAGCAGATGGTGCAGAA	7	-	1438	2556
ENSDARG00000005394	ENSDART00000100320	20	14	14	GTCTCAGCAGGCCGAAGACGCTGCG	7	-	1597	2556
ENSDARG00000005394	ENSDART00000100320	20	14	14	CTCTGCGTCTCAGCAGGCCGAAGAC	7	-	1603	2556
ENSDARG00000005394	ENSDART00000100320	20	16	16	GCACCATACCAACAGTGATGGAGTC	7	-	1834	2556
ENSDARG00000005394	ENSDART00000100320	20	17	17	TTCCTAGCAGGGTTGACGATGGA	5	-	1972	2556
ENSDARG00000005394	ENSDART00000100320	20	17	17	CCCCCACTCCTGAATCTGCAGAG	5	-	1907	2556
ENSDARG00000005394	ENSDART00000100320	20	17	17	GGCCCCCACTCCTGAATCTGCAGAG	7	-	1907	2556
ENSDARG00000005394	ENSDART00000100320	20	17	17	AAACAAGCCTTTCCTAGCAGGGTTG	7	-	1980	2556
ENSDARG00000005394	ENSDART00000100320	20	18	18	CACACCTCCAGAAAGCGTGAGAT	5	-	2137	2556
ENSDARG00000005394	ENSDART00000100320	20	18	18	ACACACCTCCAGAAAGCGTGAGAT	6	-	2137	2556
ENSDARG00000005394	ENSDART00000100320	20	18	18	TTAGGCCGCGCTTCGTGAAGCAGCC	7	-	2039	2556
ENSDARG00000005394	ENSDART00000100320	20	18	18	ACAGCCAGAAAAACGGGCGGTCGTC	7	-	2071	2556
ENSDARG00000005416	ENSDART00000046641	20	1	1	GCACTCTTACAGTTGGAGGGGTC	5	-	100	4044
ENSDARG00000005416	ENSDART00000046641	20	1	1	ACCATCATCATCTCCAGGGGCTGGC	7	-	8	4044
ENSDARG00000005416	ENSDART00000046641	20	1	1	GTTTACAGCCCACAATGTCGCAGGC	7	-	277	4044
ENSDARG00000005416	ENSDART00000046641	20	2	2	ACACCCAAATGATAGAAGAGGGA	5	-	412	4044
ENSDARG00000005416	ENSDART00000046641	20	2	2	TTCAACCACTGCAATATCTGTGAAC	7	-	363	4044
ENSDARG00000005416	ENSDART00000046641	20	4	4	GTTAGCAGCGCAGGTCTGGATAA	5	-	527	4044
ENSDARG00000005416	ENSDART00000046641	20	5	5	AGCCGCTGCTGGATGCGCCGGAGTT	7	-	806	4044
ENSDARG00000005416	ENSDART00000046641	20	7	7	TACCAAACAATAAATATCTGACGCC	7	-	1077	4044
ENSDARG00000005416	ENSDART00000046641	20	7	7	GCCACCTGCTCATCGGAGTTGAC	5	-	1057	4044
ENSDARG00000005416	ENSDART00000046641	20	8	8	GCCAGCAGCAGCACTGCATAGTTG	6	-	1221	4044
ENSDARG00000005416	ENSDART00000046641	20	9	9	TTCTTCCCCAGCAGGCTGCTTAA	5	-	1297	4044
ENSDARG00000005416	ENSDART00000046641	20	10	10	TCCACCAGCTCCTGTTTAGGGGCC	6	-	1518	4044
ENSDARG00000005416	ENSDART00000046641	20	10	10	ACCAGCTCCTGTTTAGGGGCCTGC	6	-	1515	4044
ENSDARG00000005416	ENSDART00000046641	20	13	13	CTCGTCAAATTTGGAGATGCTGAA	6	-	1762	4044
ENSDARG00000005416	ENSDART00000046641	20	18	18	AGAATCTGCTTAGTGTAGAAGCC	5	-	2269	4044
ENSDARG00000005416	ENSDART00000046641	20	18	18	AGACCATCCAGAATCTGCTTAGTGT	7	-	2276	4044
ENSDARG00000005416	ENSDART00000046641	20	21	21	AGCAGCGCAGGATAAAGGCTTTGGC	7	-	2659	4044
ENSDARG00000005416	ENSDART00000046641	20	23	23	ACAGGCAGAGAAATGCTGCGCAGAT	7	-	2810	4044
ENSDARG00000005416	ENSDART00000046641	20	23	23	TGCTGCTGCTGGGCCTGAAGTTGAA	7	-	2914	4044
ENSDARG00000005416	ENSDART00000046641	20	25	25	GCCACCTGCAGTTGGCTGATGGC	5	-	3301	4044
ENSDARG00000005416	ENSDART00000046641	20	25	25	CACCGCATCCTGGAAGCCGAAGAG	6	-	3325	4044
ENSDARG00000005416	ENSDART00000046641	20	25	25	CTCACCGCATCCTGGAAGCCGAA	5	-	3328	4044
ENSDARG00000005416	ENSDART00000046641	20	26	26	GTCTGCACAGCCTTTCGAATGATGT	7	-	3404	4044
ENSDARG00000005416	ENSDART00000046641	20	26	26	GCAAACATCCAGTGTGGCTTGATGT	7	-	3371	4044
ENSDARG00000005416	ENSDART00000046641	20	29	29	AGCATCAGCCCCGTGGAGTTTGAG	6	-	3880	4044
ENSDARG00000005416	ENSDART00000046641	20	29	29	ATCAGCATCAGCCCCGTGGAGTTT	6	-	3883	4044
ENSDARG00000005416	ENSDART00000046641	20	29	29	ATCAGCCCCGTGGAGTTTGAGCC	5	-	3878	4044
ENSDARG00000005416	ENSDART00000046641	20	29	29	GCATCAGCCCCGTGGAGTTTGAG	5	-	3880	4044
ENSDARG00000005416	ENSDART00000046641	20	29	29	GTCTCCATCCAATGAGCTGCGGGT	6	-	3832	4044
ENSDARG00000005416	ENSDART00000046641	20	29	29	GCATCAGCCCCGTGGAGTTTGAGCC	7	-	3878	4044
ENSDARG00000005416	ENSDART00000046641	20	30	30	GTCTTCAAATCGTCTCTGGTGAC	5	-	3961	4044
ENSDARG00000005463	ENSDART00000007744	20	1	1	CACTACCTCCACGATGAAGAAGCC	6	-	64	1494
ENSDARG00000005463	ENSDART00000007744	20	1	1	AGCGACAGCATGCAGAGCAGGCGAA	7	-	32	1494
ENSDARG00000005463	ENSDART00000007744	20	1	1	TACCTCCACGATGAAGAAGCCGAA	6	-	61	1494
ENSDARG00000005463	ENSDART00000007744	20	1	1	GACCACTACCTCCACGATGAAGAA	6	-	67	1494
ENSDARG00000005463	ENSDART00000007744	20	1	1	TCCGACAGCATGTGGAATGAGTC	5	-	124	1494
ENSDARG00000005463	ENSDART00000007744	20	2	2	AGCCCCACAACAGAGCTTTGGTGCA	7	-	1302	1494
ENSDARG00000005463	ENSDART00000007744	20	2	2	GGCTACATCCATGTAGGATGTGGGG	7	-	1155	1494
ENSDARG00000005463	ENSDART00000007744	20	2	2	GCACACTGCGTTCGGCAGGAGAG	5	-	1282	1494
ENSDARG00000005463	ENSDART00000007744	20	2	2	GTCCTCCACGGACTCGCTGATGAT	6	-	1426	1494
ENSDARG00000005463	ENSDART00000007744	20	2	2	GAAAACACCCCGCATGTTGAGCT	5	-	698	1494
ENSDARG00000005463	ENSDART00000007744	20	2	2	ACAGCCCCACAACAGAGCTTTGGTG	7	-	1304	1494
ENSDARG00000005463	ENSDART00000007744	20	2	2	AGAACCTTCAAGAGGTTTTGCGGTA	7	-	1332	1494
ENSDARG00000005463	ENSDART00000007744	20	2	2	AGCCCCACAACAGAGCTTTGGTG	5	-	1304	1494
ENSDARG00000005463	ENSDART00000007744	20	2	2	CCCCACAACAGAGCTTTGGTGCA	5	-	1302	1494
ENSDARG00000005463	ENSDART00000007744	20	2	2	CCCGCCAGCTGCCAGATGTGCAGCT	7	-	1091	1494
ENSDARG00000005481	ENSDART00000013798	20	3	3	AAACAAGGCTCGCTGGCGTGTTT	5	+	475	930
ENSDARG00000005481	ENSDART00000013798	20	3	3	AAAGACTCCTGAAAGCCGGCTGC	5	+	401	930
ENSDARG00000005481	ENSDART00000013798	20	5	5	ACCTGCAGAACCTGGATCTGGTGCA	7	+	692	930
ENSDARG00000005536	ENSDART00000024595	20	1	1	CGCCTCCTCTCCATCATTTGCCGCC	7	-	12	1230
ENSDARG00000005536	ENSDART00000024595	20	2	2	CTCTCCTCCCTTTGGTGTGCAGGT	6	-	175	1230
ENSDARG00000005536	ENSDART00000024595	20	4	4	TACCTCGTCCTCTGGATCTGGGTAG	7	-	408	1230
ENSDARG00000005536	ENSDART00000024595	20	4	4	CTCGTCCTCTGGATCTGGGTAGGG	6	-	406	1230
ENSDARG00000005536	ENSDART00000024595	20	4	4	CTCGTCCTCTGGATCTGGGTAGGGT	7	-	405	1230
ENSDARG00000005536	ENSDART00000024595	20	7	7	ACCTTCACATCCTCCTCTGCTTTG	6	-	618	1230
ENSDARG00000005536	ENSDART00000024595	20	10	10	TTCTGCTGCGAATCTTTGCAGGT	5	-	1118	1230
ENSDARG00000005536	ENSDART00000024595	20	11	11	CTCTTCGTCTCTTGCGACTTTGCT	6	-	1187	1230
ENSDARG00000005579	ENSDART00000007218	20	1	1	TCCGCCTGCAGCACTCGGCGCAGGT	7	+	1007	1149
ENSDARG00000005579	ENSDART00000007218	20	1	1	GCCAAAGCCATGCGGAAGCTGCA	5	+	415	1149
ENSDARG00000005579	ENSDART00000007218	20	1	1	CCCAAAGCCACGCGCCTCTGAATCT	7	+	908	1149
ENSDARG00000005579	ENSDART00000007218	20	1	1	CAAAGCCACGCGCCTCTGAATCT	5	+	910	1149
ENSDARG00000005579	ENSDART00000007218	20	1	1	AGCCAAAGCCATGCGGAAGCTGCA	6	+	414	1149
ENSDARG00000005579	ENSDART00000007218	20	1	1	AACCTCGCCTCGCACCGGCGGTGGC	7	+	676	1149
ENSDARG00000005579	ENSDART00000007218	20	1	1	AAAGCCAAAGCCATGCGGAAGCT	5	+	412	1149
ENSDARG00000005595	ENSDART00000021575	20	3	3	GTTCTCTAACAGCAAAGCCTTTTTC	7	+	209	1881
ENSDARG00000005595	ENSDART00000021575	20	4	4	GCCGTCCACCTACATCTCTGCAGCA	7	+	339	1881
ENSDARG00000005595	ENSDART00000021575	20	5	5	GAAAGCACATGGCATGGGCATAA	5	+	507	1881
ENSDARG00000005595	ENSDART00000021575	20	8	8	AGACTCTGCAAGAGATGTGGGCTTC	7	+	839	1881
ENSDARG00000005595	ENSDART00000021575	20	10	10	CCCCTATTCCTGTATGTATTTTGC	6	+	1088	1881
ENSDARG00000005595	ENSDART00000021575	20	10	10	GTATACACCGAACAAGGTTTGTTT	6	+	1176	1881
ENSDARG00000005595	ENSDART00000021575	20	11	11	ATCAAAAGAACATCATCTGCAGGT	6	+	1358	1881
ENSDARG00000005619	ENSDART00000003248	20	4	3	GCCATCACACGCAGGATGAATTC	5	-	340	1320
ENSDARG00000005619	ENSDART00000003248	20	4	3	GCATCCAGAAAGATGTTTGCTGGT	6	-	438	1320
ENSDARG00000005619	ENSDART00000003248	20	7	6	TGCCTCATCTGATCTGCGCCGCT	5	-	866	1320
ENSDARG00000005619	ENSDART00000003248	20	7	6	AGCCGCAGCTCTGCCAGAAGTGGTG	7	-	911	1320
ENSDARG00000005619	ENSDART00000003248	20	7	6	AGAATCTGCTCTTTAAGCCGCAGCT	7	-	926	1320
ENSDARG00000005619	ENSDART00000003248	20	10	9	CTCCTCTCCGAGTGTCTGTATGC	5	-	1259	1320
ENSDARG00000005652	ENSDART00000006423	20	1	1	GACATCAACAACGATAAGATTAA	5	+	358	1854
ENSDARG00000005652	ENSDART00000006423	20	1	1	GACACCTTACAGAAGCGGCCGGA	5	+	322	1854
ENSDARG00000005652	ENSDART00000006423	20	1	1	CTAAGCTGCTCAGCGGAGTTTTCT	6	+	167	1854
ENSDARG00000005652	ENSDART00000006423	20	1	1	CTAAGCTGCTCAGCGGAGTTTTC	5	+	167	1854
ENSDARG00000005652	ENSDART00000006423	20	1	1	AGCGCCTTCATCACGTTGTGTTT	5	+	115	1854
ENSDARG00000005652	ENSDART00000006423	20	1	1	AAATTCATCTTGCTTTTAGTGTTC	6	+	91	1854
ENSDARG00000005652	ENSDART00000006423	20	2	2	CACTCCAGCAATTTGTTTGGTGAG	6	+	586	1854
ENSDARG00000005652	ENSDART00000006423	20	2	2	GGCCACTCCAGCAATTTGTTTGGTG	7	+	583	1854
ENSDARG00000005652	ENSDART00000006423	20	3	3	AACCTCGACTTTAACATGGTGAGAC	7	+	703	1854
ENSDARG00000005652	ENSDART00000006423	20	4	4	GAAATCTCCGTCTTTGAAGTGAAC	6	+	727	1854
ENSDARG00000005652	ENSDART00000006423	20	9	9	AGAAAAATCTGATCCGGAAGTCGAG	7	+	1238	1854
ENSDARG00000005652	ENSDART00000006423	20	10	10	CCCAAATACAGACAATGGGGCTGGG	7	+	1588	1854
ENSDARG00000005652	ENSDART00000006423	20	10	10	AAATACAGACAATGGGGCTGGGAG	6	+	1591	1854
ENSDARG00000005652	ENSDART00000006423	20	11	11	CAACAATCCAAACCATGATGACGTG	7	+	1683	1854
ENSDARG00000005652	ENSDART00000048990	20	4	4	AGAAAAATCTGATCCGGAAGTCGAG	7	+	350	1029
ENSDARG00000005652	ENSDART00000048990	20	5	5	CCCAAATACAGACAATGGGGCTGGG	7	+	700	1029
ENSDARG00000005652	ENSDART00000048990	20	5	5	AAATACAGACAATGGGGCTGGGAG	6	+	703	1029
ENSDARG00000005652	ENSDART00000048990	20	6	6	CAACAATCCAAACCATGATGACGTG	7	+	795	1029
ENSDARG00000005652	ENSDART00000100991	20	5	5	AGAAAAATCTGATCCGGAAGTCGAG	7	+	353	969
ENSDARG00000005652	ENSDART00000100991	20	6	6	AAATACAGACAATGGGGCTGGGAG	6	+	706	969
ENSDARG00000005652	ENSDART00000100991	20	6	6	CCCAAATACAGACAATGGGGCTGGG	7	+	703	969
ENSDARG00000005652	ENSDART00000100991	20	7	7	CAACAATCCAAACCATGATGACGTG	7	+	798	969
ENSDARG00000005652	ENSDART00000100994	20	4	4	AGAAAAATCTGATCCGGAAGTCGAG	7	+	350	1029
ENSDARG00000005652	ENSDART00000100994	20	5	5	CCCAAATACAGACAATGGGGCTGGG	7	+	700	1029
ENSDARG00000005652	ENSDART00000100994	20	5	5	AAATACAGACAATGGGGCTGGGAG	6	+	703	1029
ENSDARG00000005652	ENSDART00000100994	20	6	6	CAACAATCCAAACCATGATGACGTG	7	+	795	1029
ENSDARG00000005652	ENSDART00000100996	20	1	1	GACACCTTACAGAAGCGGCCGGA	5	+	67	1650
ENSDARG00000005652	ENSDART00000100996	20	1	1	GACATCAACAACGATAAGATTAA	5	+	103	1650
ENSDARG00000005652	ENSDART00000100996	20	4	4	CACTCCAGCAATTTGTTTGGTGAG	6	+	397	1650
ENSDARG00000005652	ENSDART00000100996	20	4	4	GGCCACTCCAGCAATTTGTTTGGTG	7	+	394	1650
ENSDARG00000005652	ENSDART00000100996	20	5	5	AACCTCGACTTTAACATGGTGAGAC	7	+	514	1650
ENSDARG00000005652	ENSDART00000100996	20	6	6	GAAATCTCCGTCTTTGAAGTGAAC	6	+	538	1650
ENSDARG00000005652	ENSDART00000100996	20	11	11	AGAAAAATCTGATCCGGAAGTCGAG	7	+	1049	1650
ENSDARG00000005652	ENSDART00000100996	20	12	12	CCCAAATACAGACAATGGGGCTGGG	7	+	1399	1650
ENSDARG00000005652	ENSDART00000100996	20	12	12	AAATACAGACAATGGGGCTGGGAG	6	+	1402	1650
ENSDARG00000005652	ENSDART00000100996	20	13	13	CAACAATCCAAACCATGATGACGTG	7	+	1494	1650
ENSDARG00000005670	ENSDART00000016815	20	2	2	TCCATCTTCAGGACTTGTTTTGGTT	7	-	176	981
ENSDARG00000005670	ENSDART00000016815	20	2	2	TCCATCTTCAGGACTTGTTTTGGT	6	-	177	981
ENSDARG00000005670	ENSDART00000016815	20	4	4	GGCCCAGTCTGAGTGTGGTGGAG	5	-	354	981
ENSDARG00000005670	ENSDART00000016815	20	4	4	GGCCCAGTCTGAGTGTGGTGGAGAC	7	-	352	981
ENSDARG00000005670	ENSDART00000016815	20	4	4	GTCGGCCCAGTCTGAGTGTGGTGGA	7	-	355	981
ENSDARG00000005670	ENSDART00000016815	20	6	6	GAATCCTGCCACAGGACGTGGCT	5	-	545	981
ENSDARG00000005670	ENSDART00000016815	20	6	6	TCCTGCCACAGGACGTGGCTTTGAA	7	-	540	981
ENSDARG00000005670	ENSDART00000016815	20	6	6	TCCTGCCACAGGACGTGGCTTTG	5	-	542	981
ENSDARG00000005670	ENSDART00000016815	20	9	9	GTCAACTGCTGGGCTGTGGTTGCC	6	-	942	981
ENSDARG00000005670	ENSDART00000016815	20	9	9	GTCAACTGCTGGGCTGTGGTTGC	5	-	943	981
ENSDARG00000005670	ENSDART00000016815	20	9	9	GTCAAAGACTGACATTAGGAGCT	5	-	830	981
ENSDARG00000005716	ENSDART00000029620	20	1	1	ACCTGCAGAGTGTCGTTGTTGTC	5	-	106	2652
ENSDARG00000005716	ENSDART00000029620	20	2	2	GAAGTCACCTTCACAGGGGTTTAA	6	-	361	2652
ENSDARG00000005716	ENSDART00000029620	20	3	3	CCCTCCAGCAGTTCCAGTATAGTTG	7	-	431	2652
ENSDARG00000005716	ENSDART00000029620	20	4	4	ACCTCCCACCTCCATGTGCTGAA	5	-	686	2652
ENSDARG00000005716	ENSDART00000029620	20	4	4	TTCAACTTCTCCTCAGTCTGGTTGT	7	-	545	2652
ENSDARG00000005716	ENSDART00000029620	20	4	4	TTCAACTTCTCCTCAGTCTGGTTG	6	-	546	2652
ENSDARG00000005716	ENSDART00000029620	20	4	4	CTCTTCTCCTGAATGACTGAGGG	5	-	625	2652
ENSDARG00000005716	ENSDART00000029620	20	5	5	CCCCTCACAGTAATTTTGGGTTGCT	7	-	833	2652
ENSDARG00000005716	ENSDART00000029620	20	5	5	CCCCTCACAGTAATTTTGGGTTG	5	-	835	2652
ENSDARG00000005716	ENSDART00000029620	20	6	6	CTCATCTCCTGTGGAGCTGTCTGT	6	-	1168	2652
ENSDARG00000005716	ENSDART00000029620	20	6	6	AGCCTCCACTTTAACAGCTGCAGCG	7	-	1359	2652
ENSDARG00000005716	ENSDART00000029620	20	6	6	TGCAGCGACTGACTCATTTGTTTTT	7	-	1341	2652
ENSDARG00000005716	ENSDART00000029620	20	6	6	GTCCCATTAATGGATTTTGATGTT	6	-	1067	2652
ENSDARG00000005716	ENSDART00000029620	20	6	6	GCAGTCCCATTGGTCTGGTTTGTC	6	-	1398	2652
ENSDARG00000005716	ENSDART00000029620	20	6	6	GCAGTCCCATTAATGGATTTTGAT	6	-	1070	2652
ENSDARG00000005716	ENSDART00000029620	20	8	8	GCCTTCATCATCCAGCGCCGGGTAA	7	-	2295	2652
ENSDARG00000005716	ENSDART00000029620	20	8	8	TACAACACCCGCTCTTTGGGATTGT	7	-	2576	2652
ENSDARG00000005716	ENSDART00000029620	20	8	8	AACACCCGCTCTTTGGGATTGTAA	6	-	2574	2652
ENSDARG00000005789	ENSDART00000045183	20	2	2	AAAGCCAGCAAGCCAAGAAGAAGCA	7	-	140	2634
ENSDARG00000005789	ENSDART00000045183	20	4	4	ACAGTCTGCAGAGCAGGAGCAGAG	6	-	397	2634
ENSDARG00000005789	ENSDART00000045183	20	4	4	GTCTGCAGAGCAGGAGCAGAGGCT	6	-	394	2634
ENSDARG00000005789	ENSDART00000045183	20	6	6	AACAGCAGCGGCGATTTAGAAAAC	6	-	528	2634
ENSDARG00000005789	ENSDART00000045183	20	12	12	GTTGACACATTTGTGCAGATTTC	5	-	1139	2634
ENSDARG00000005789	ENSDART00000045183	20	13	13	TCCTCAGGCACGTGTCGCGGTCGGA	7	-	1280	2634
ENSDARG00000005789	ENSDART00000045183	20	18	18	GACCTCGGCCTCGGTGAGGGAGTC	6	-	1798	2634
ENSDARG00000005789	ENSDART00000045183	20	18	18	AACACCGGCTGATATCGCGGCTTTT	7	-	1697	2634
ENSDARG00000005789	ENSDART00000045183	20	21	21	GCACGCACACACCATTCTGCAGAA	6	-	2028	2634
ENSDARG00000005789	ENSDART00000045183	20	21	21	GCACACACCATTCTGCAGAAGGA	5	-	2025	2634
ENSDARG00000005789	ENSDART00000045183	20	24	24	GTTTCCAGATGATCAGGACGATGAG	7	-	2462	2634
ENSDARG00000005924	ENSDART00000010293	20	2	1	TTAGCCACATTAGCAGCCGGGGCT	6	+	190	1173
ENSDARG00000005924	ENSDART00000010293	20	2	1	TCCAGCAGCTGAGGGAAGACGCT	5	+	302	1173
ENSDARG00000005924	ENSDART00000010293	20	2	1	GGCAAACCACAGATGTTGAAGAG	5	+	65	1173
ENSDARG00000005924	ENSDART00000010293	20	3	2	TTCTTCTTCCGGATGAAGATGTG	5	+	749	1173
ENSDARG00000005924	ENSDART00000010293	20	4	3	GTCCAATTCGCTCAGTGTGAGTCT	6	+	882	1173
ENSDARG00000005924	ENSDART00000010293	20	4	3	GTCCAATTCGCTCAGTGTGAGTC	5	+	882	1173
ENSDARG00000006044	ENSDART00000007735	20	2	2	GCCTCCTACACCGAGGGTGAGTTG	6	+	264	1221
ENSDARG00000006044	ENSDART00000007735	20	2	2	GCCTCCTACACCGAGGGTGAGTT	5	+	264	1221
ENSDARG00000006044	ENSDART00000007735	20	3	3	AAACCAGACTTACAAAGCATGAGCA	7	+	410	1221
ENSDARG00000006044	ENSDART00000007735	20	5	5	CACCCCAGATGAAGGATGATGAG	5	+	638	1221
ENSDARG00000006044	ENSDART00000007735	20	5	5	CACACCCCAGATGAAGGATGATGAG	7	+	636	1221
ENSDARG00000006044	ENSDART00000007735	20	8	8	TTCTGCAGCATTCTGGAAGATGGG	6	+	918	1221
ENSDARG00000006094	ENSDART00000061101	20	2	2	ATCTCCAAAAACAGAATGTGGAGAA	7	+	195	7380
ENSDARG00000006094	ENSDART00000061101	20	2	2	CTCCAAAAACAGAATGTGGAGAA	5	+	197	7380
ENSDARG00000006094	ENSDART00000061101	20	2	2	TCCAAAAACAGAATGTGGAGAAGGA	7	+	198	7380
ENSDARG00000006094	ENSDART00000061101	20	3	3	CAATGCGGCAAAACAATGGTGAGCT	7	+	373	7380
ENSDARG00000006094	ENSDART00000061101	20	4	4	TTCCACAAAAGGGCACGCCTGAGTT	7	+	383	7380
ENSDARG00000006094	ENSDART00000061101	20	4	4	TTAAACCGCATAAAGAGGTGGGT	5	+	476	7380
ENSDARG00000006094	ENSDART00000061101	20	4	4	TTAAACCGCATAAAGAGGTGGGTAA	7	+	476	7380
ENSDARG00000006094	ENSDART00000061101	20	7	7	GAAAGCCCAGACTTCTGTGATGGC	6	+	772	7380
ENSDARG00000006094	ENSDART00000061101	20	9	9	CAATTCAAAGAGAATGGCGATGTA	6	+	1132	7380
ENSDARG00000006094	ENSDART00000061101	20	9	9	GACCAATGCTGGACAGTGTTTTGAC	7	+	1083	7380
ENSDARG00000006094	ENSDART00000061101	20	9	9	AGATACACCATACATGGCTGAGGCC	7	+	1011	7380
ENSDARG00000006094	ENSDART00000061101	20	9	9	AGATACACCATACATGGCTGAGGC	6	+	1011	7380
ENSDARG00000006094	ENSDART00000061101	20	10	10	ATCTACCCAGACGGCAGCAGATGCA	7	+	1219	7380
ENSDARG00000006094	ENSDART00000061101	20	10	10	TACCCAGACGGCAGCAGATGCAGCA	7	+	1222	7380
ENSDARG00000006094	ENSDART00000061101	20	10	10	TTAATCTACCCAGACGGCAGCAGAT	7	+	1216	7380
ENSDARG00000006094	ENSDART00000061101	20	10	10	CTACCCAGACGGCAGCAGATGCA	5	+	1221	7380
ENSDARG00000006094	ENSDART00000061101	20	11	11	GCAGACGTCGTACGCATGTGTGGAG	7	+	1353	7380
ENSDARG00000006094	ENSDART00000061101	20	12	12	CGCAAAAGCAGCAGAGTCTGATAA	6	+	1485	7380
ENSDARG00000006094	ENSDART00000061101	20	12	12	AAAATCATCCAGGATGGGGTGGC	5	+	1537	7380
ENSDARG00000006094	ENSDART00000061101	20	12	12	AAAATCATCCAGGATGGGGTGGCC	6	+	1537	7380
ENSDARG00000006094	ENSDART00000061101	20	13	13	AGCATCATCACTCTGAAGTGTAA	5	+	1720	7380
ENSDARG00000006094	ENSDART00000061101	20	13	13	GGCTGCATCTATGAGTTTGAGTG	5	+	1792	7380
ENSDARG00000006094	ENSDART00000061101	20	13	13	GACGGCTGCATCTATGAGTTTGAG	6	+	1789	7380
ENSDARG00000006094	ENSDART00000061101	20	15	15	TTCAGCGGCAAATCGTCTTGGAA	5	+	2032	7380
ENSDARG00000006094	ENSDART00000061101	20	17	17	GTCGTCCTCTTAAAGCTGTGCCGGG	7	+	2417	7380
ENSDARG00000006094	ENSDART00000061101	20	17	17	AAATACTACATCAATGTGTGTCGTC	7	+	2398	7380
ENSDARG00000006094	ENSDART00000061101	20	18	18	AGCAAAACCAGCTGATGTTGGAGTA	7	+	2558	7380
ENSDARG00000006094	ENSDART00000061101	20	18	18	CGCATCCACTTCGTCTGCGCTTCT	6	+	2635	7380
ENSDARG00000006094	ENSDART00000061101	20	20	20	GAATTCAACCTGCAGCCGCTGGC	5	+	2803	7380
ENSDARG00000006094	ENSDART00000061101	20	24	24	GCAGTCAAACCTCCAGGCCGCAGCA	7	+	3423	7380
ENSDARG00000006094	ENSDART00000061101	20	24	24	GCAGACGGCTCCATCAGTATTGTTT	7	+	3445	7380
ENSDARG00000006094	ENSDART00000061101	20	24	24	AGAATCATCTTCCAGTGTGATGAC	6	+	3514	7380
ENSDARG00000006094	ENSDART00000061101	20	26	26	AAAAGCACAGGATTGCAGGTGAG	5	+	3818	7380
ENSDARG00000006094	ENSDART00000061101	20	26	26	GCCCAATTACAACCTCTGTCTGC	5	+	3749	7380
ENSDARG00000006094	ENSDART00000061101	20	27	27	CAAAACCTCACGTTTGACGATGGG	6	+	3847	7380
ENSDARG00000006094	ENSDART00000061101	20	27	27	ATCAAAACCTCACGTTTGACGAT	5	+	3845	7380
ENSDARG00000006094	ENSDART00000061101	20	28	28	GACTGCACATATCTGTTTGAGTG	5	+	3997	7380
ENSDARG00000006094	ENSDART00000061101	20	29	29	GCACAAATCTAATTGGATTGTTG	5	+	4113	7380
ENSDARG00000006094	ENSDART00000061101	20	29	29	AGAATCATCGAATCAGAAGCAGCG	6	+	4140	7380
ENSDARG00000006094	ENSDART00000061101	20	30	30	AAAAACGTCCTGGTTCTGAAGTA	5	+	4300	7380
ENSDARG00000006094	ENSDART00000061101	20	30	30	CAATCCAGACAAAGTGGTTTGTG	5	+	4386	7380
ENSDARG00000006094	ENSDART00000061101	20	33	33	GCACACTCCTCTAGTCTGCGAAC	5	+	4893	7380
ENSDARG00000006094	ENSDART00000061101	20	33	33	TTCGTCTGCAAGTCTGAAGGAGGA	6	+	4807	7380
ENSDARG00000006094	ENSDART00000061101	20	33	33	AGCTTCGTCTGCAAGTCTGAAGGA	6	+	4804	7380
ENSDARG00000006094	ENSDART00000061101	20	34	34	TTACTACACTGCTATAGATGAGGAT	7	+	4986	7380
ENSDARG00000006094	ENSDART00000061101	20	34	34	CTACACTGCTATAGATGAGGATGTG	7	+	4989	7380
ENSDARG00000006094	ENSDART00000061101	20	35	35	TTCACCTGCCAGAAAGGAGCAGAG	6	+	5257	7380
ENSDARG00000006094	ENSDART00000061101	20	35	35	AGCAGCACAACTGTCTGCGCCTCT	6	+	5200	7380
ENSDARG00000006094	ENSDART00000061101	20	36	36	CACAGCTGCATGTATGTGTTTGAA	6	+	5308	7380
ENSDARG00000006094	ENSDART00000061101	20	37	37	TTCAGCATCAACGTGTGTGGGAC	5	+	5464	7380
ENSDARG00000006094	ENSDART00000061101	20	37	37	AGCATCAACGTGTGTGGGACTGT	5	+	5467	7380
ENSDARG00000006094	ENSDART00000061101	20	39	39	CTCTGCCACTTTTCAGTGGAGAAC	6	+	5889	7380
ENSDARG00000006094	ENSDART00000061101	20	40	40	AAAAACAGAGACTCTGGGCCGGG	5	+	6120	7380
ENSDARG00000006094	ENSDART00000061101	20	42	42	GAAAAATCCTGTGAGTTCTGGTTTG	7	+	6295	7380
ENSDARG00000006094	ENSDART00000061101	20	43	43	ATCTACCACATCCAGCTGTCGGG	5	+	6481	7380
ENSDARG00000006094	ENSDART00000061101	20	44	44	AGACAAAACCAAAACTGTGTCTTC	6	+	6666	7380
ENSDARG00000006094	ENSDART00000061101	20	44	44	GACAAAACCAAAACTGTGTCTTC	5	+	6667	7380
ENSDARG00000006094	ENSDART00000061101	20	44	44	CACACCTCCACCGTTTGTGAATTT	6	+	6781	7380
ENSDARG00000006094	ENSDART00000061101	20	44	44	GCACACCTCCACCGTTTGTGAATTT	7	+	6780	7380
ENSDARG00000006094	ENSDART00000061101	20	45	45	GACAGCACCGATGGAGGGGAGGAG	6	+	6823	7380
ENSDARG00000006094	ENSDART00000061101	20	47	47	GACAGCGACGAGGATCTGCTGAA	5	+	7363	7380
ENSDARG00000006094	ENSDART00000061101	20	47	47	CACCAAACCGGTCCGTGCAGACGCC	7	+	7125	7380
ENSDARG00000006278	ENSDART00000020588	20	1	1	GCAATCAGATTTGAGAATTGTTG	5	+	366	1407
ENSDARG00000006278	ENSDART00000020588	20	1	1	GAATTCCTCAGTGTGTCTTTTGGA	6	+	467	1407
ENSDARG00000006278	ENSDART00000020588	20	1	1	ATCCAAGGCTCTGCTGGCATTTGTG	7	+	1107	1407
ENSDARG00000006278	ENSDART00000020588	20	1	1	AACCCCTGCGGATCGCTGCAGTT	5	+	843	1407
ENSDARG00000006278	ENSDART00000020588	20	1	1	AAAGCCTTACATAAGTAATGGGAA	6	+	531	1407
ENSDARG00000006332	ENSDART00000020506	20	1	1	ACATCCTTAAACATGTCGAAGCG	5	-	55	2808
ENSDARG00000006332	ENSDART00000020506	20	1	1	CACAGCCCAGAAATGAGTGAGGG	5	-	18	2808
ENSDARG00000006332	ENSDART00000020506	20	3	3	AACTCATGCTGTTCTTGAGGCTGCA	7	-	263	2808
ENSDARG00000006332	ENSDART00000020506	20	6	6	TGCAGCAAAGAAGCGGATGGTTT	5	-	509	2808
ENSDARG00000006332	ENSDART00000020506	20	6	6	GACTGCAGCAAAGAAGCGGATGGT	6	-	511	2808
ENSDARG00000006332	ENSDART00000020506	20	6	6	TGCAGCAAAGAAGCGGATGGTTTG	6	-	508	2808
ENSDARG00000006332	ENSDART00000020506	20	8	8	TACAGCAGCTCATCTTTGCGGCT	5	-	712	2808
ENSDARG00000006332	ENSDART00000020506	20	9	9	AGCCACAAAGTCCATTATTGGGA	5	-	845	2808
ENSDARG00000006332	ENSDART00000020506	20	13	13	CACCTCCTCGTGCAGACGCTGCT	5	-	1163	2808
ENSDARG00000006332	ENSDART00000020506	20	13	13	TTCTTCACCTCCTCGTGCAGACGCT	7	-	1166	2808
ENSDARG00000006332	ENSDART00000020506	20	13	13	AGACGCTGCTTCTCGTCGTCGCT	5	-	1150	2808
ENSDARG00000006332	ENSDART00000020506	20	13	13	TTCACCTCCTCGTGCAGACGCTGCT	7	-	1163	2808
ENSDARG00000006332	ENSDART00000020506	20	14	14	ACAGGCAGCGCATGGTCTGGAGCT	6	-	1301	2808
ENSDARG00000006332	ENSDART00000020506	20	15	15	GGCGCCGCAGAGCAGATGGCGAA	5	-	1400	2808
ENSDARG00000006332	ENSDART00000020506	20	15	15	CTCGGCGCCGCAGAGCAGATGGC	5	-	1403	2808
ENSDARG00000006332	ENSDART00000020506	20	16	16	TTCTCCTTCAATCATGGCGTATTG	6	-	1555	2808
ENSDARG00000006332	ENSDART00000020506	20	19	19	CTCAAATTCTCCTCGTTTAGAGGAC	7	-	1929	2808
ENSDARG00000006332	ENSDART00000020506	20	20	20	GTTGACATCTGGCAGCATTTTGT	5	-	2051	2808
ENSDARG00000006332	ENSDART00000020506	20	20	20	GAAGTCGGCCAACAGCTGGCTGT	5	-	1994	2808
ENSDARG00000006332	ENSDART00000020506	20	20	20	TTACTCAGCTCAGGGTGATGCAGAA	7	-	1970	2808
ENSDARG00000006332	ENSDART00000020506	20	22	22	GTTTTCCGCAGTGGGGCTGAGGAT	6	-	2206	2808
ENSDARG00000006332	ENSDART00000020506	20	22	22	GTTTTCCGCAGTGGGGCTGAGGA	5	-	2207	2808
ENSDARG00000006332	ENSDART00000020506	20	23	23	TCCATCAGCTCCATGAAGTAGTT	5	-	2305	2808
ENSDARG00000006332	ENSDART00000020506	20	23	23	CCCTCCGGCAGGTTGGCATTGTTT	6	-	2259	2808
ENSDARG00000006332	ENSDART00000020506	20	25	25	ACAAACCTCTCAGCAGGGTGACGAG	7	-	2515	2808
ENSDARG00000006332	ENSDART00000104723	20	1	1	ACATCCTTAAACATGTCGAAGCG	5	-	25	2799
ENSDARG00000006332	ENSDART00000104723	20	3	3	AACTCATGCTGTTCTTGAGGCTGCA	7	-	233	2799
ENSDARG00000006332	ENSDART00000104723	20	6	6	TGCAGCAAAGAAGCGGATGGTTTG	6	-	478	2799
ENSDARG00000006332	ENSDART00000104723	20	6	6	GACTGCAGCAAAGAAGCGGATGGT	6	-	481	2799
ENSDARG00000006332	ENSDART00000104723	20	6	6	TGCAGCAAAGAAGCGGATGGTTT	5	-	479	2799
ENSDARG00000006332	ENSDART00000104723	20	8	8	TACAGCAGCTCATCTTTGCGGCT	5	-	682	2799
ENSDARG00000006332	ENSDART00000104723	20	9	9	AGCCACAAAGTCCATTATTGGGA	5	-	815	2799
ENSDARG00000006332	ENSDART00000104723	20	13	13	CACCTCCTCGTGCAGACGCTGCT	5	-	1133	2799
ENSDARG00000006332	ENSDART00000104723	20	13	13	AGACGCTGCTTCTCGTCGTCGCT	5	-	1120	2799
ENSDARG00000006332	ENSDART00000104723	20	13	13	TTCTTCACCTCCTCGTGCAGACGCT	7	-	1136	2799
ENSDARG00000006332	ENSDART00000104723	20	13	13	TTCACCTCCTCGTGCAGACGCTGCT	7	-	1133	2799
ENSDARG00000006332	ENSDART00000104723	20	14	14	ACAGGCAGCGCATGGTCTGGAGCT	6	-	1271	2799
ENSDARG00000006332	ENSDART00000104723	20	15	15	GGCGCCGCAGAGCAGATGGCGAA	5	-	1370	2799
ENSDARG00000006332	ENSDART00000104723	20	15	15	CTCGGCGCCGCAGAGCAGATGGC	5	-	1373	2799
ENSDARG00000006332	ENSDART00000104723	20	18	18	TTCTCCTTCAATCATGGCGTATTG	6	-	1552	2799
ENSDARG00000006332	ENSDART00000104723	20	21	21	CTCAAATTCTCCTCGTTTAGAGGAC	7	-	1926	2799
ENSDARG00000006332	ENSDART00000104723	20	22	22	GAAGTCGGCCAACAGCTGGCTGT	5	-	1991	2799
ENSDARG00000006332	ENSDART00000104723	20	22	22	TTACTCAGCTCAGGGTGATGCAGAA	7	-	1967	2799
ENSDARG00000006332	ENSDART00000104723	20	22	22	GTTGACATCTGGCAGCATTTTGT	5	-	2048	2799
ENSDARG00000006332	ENSDART00000104723	20	24	24	GTTTTCCGCAGTGGGGCTGAGGAT	6	-	2203	2799
ENSDARG00000006332	ENSDART00000104723	20	24	24	GTTTTCCGCAGTGGGGCTGAGGA	5	-	2204	2799
ENSDARG00000006332	ENSDART00000104723	20	25	25	TCCATCAGCTCCATGAAGTAGTT	5	-	2302	2799
ENSDARG00000006332	ENSDART00000104723	20	25	25	CCCTCCGGCAGGTTGGCATTGTTT	6	-	2256	2799
ENSDARG00000006332	ENSDART00000104723	20	26	26	ACAAACCTCTCAGCAGGGTGACGAG	7	-	2506	2799
ENSDARG00000006332	ENSDART00000104725	20	2	1	ACATCCTTAAACATGTCGAAGCG	5	-	55	2811
ENSDARG00000006332	ENSDART00000104725	20	2	1	CACAGCCCAGAAATGAGTGAGGG	5	-	18	2811
ENSDARG00000006332	ENSDART00000104725	20	4	3	AACTCATGCTGTTCTTGAGGCTGCA	7	-	263	2811
ENSDARG00000006332	ENSDART00000104725	20	7	6	TGCAGCAAAGAAGCGGATGGTTT	5	-	509	2811
ENSDARG00000006332	ENSDART00000104725	20	7	6	TGCAGCAAAGAAGCGGATGGTTTG	6	-	508	2811
ENSDARG00000006332	ENSDART00000104725	20	7	6	GACTGCAGCAAAGAAGCGGATGGT	6	-	511	2811
ENSDARG00000006332	ENSDART00000104725	20	9	8	TACAGCAGCTCATCTTTGCGGCT	5	-	712	2811
ENSDARG00000006332	ENSDART00000104725	20	10	9	AGCCACAAAGTCCATTATTGGGA	5	-	845	2811
ENSDARG00000006332	ENSDART00000104725	20	14	13	CACCTCCTCGTGCAGACGCTGCT	5	-	1163	2811
ENSDARG00000006332	ENSDART00000104725	20	14	13	TTCACCTCCTCGTGCAGACGCTGCT	7	-	1163	2811
ENSDARG00000006332	ENSDART00000104725	20	14	13	TTCTTCACCTCCTCGTGCAGACGCT	7	-	1166	2811
ENSDARG00000006332	ENSDART00000104725	20	14	13	AGACGCTGCTTCTCGTCGTCGCT	5	-	1150	2811
ENSDARG00000006332	ENSDART00000104725	20	15	14	ACAGGCAGCGCATGGTCTGGAGCT	6	-	1301	2811
ENSDARG00000006332	ENSDART00000104725	20	16	15	GGCGCCGCAGAGCAGATGGCGAA	5	-	1400	2811
ENSDARG00000006332	ENSDART00000104725	20	16	15	CTCGGCGCCGCAGAGCAGATGGC	5	-	1403	2811
ENSDARG00000006332	ENSDART00000104725	20	17	16	TTCTCCTTCAATCATGGCGTATTG	6	-	1555	2811
ENSDARG00000006332	ENSDART00000104725	20	20	19	CTCAAATTCTCCTCGTTTAGAGGAC	7	-	1929	2811
ENSDARG00000006332	ENSDART00000104725	20	21	20	TTACTCAGCTCAGGGTGATGCAGAA	7	-	1970	2811
ENSDARG00000006332	ENSDART00000104725	20	21	20	GTTGACATCTGGCAGCATTTTGT	5	-	2051	2811
ENSDARG00000006332	ENSDART00000104725	20	21	20	GAAGTCGGCCAACAGCTGGCTGT	5	-	1994	2811
ENSDARG00000006332	ENSDART00000104725	20	23	22	GTTTTCCGCAGTGGGGCTGAGGAT	6	-	2206	2811
ENSDARG00000006332	ENSDART00000104725	20	23	22	GTTTTCCGCAGTGGGGCTGAGGA	5	-	2207	2811
ENSDARG00000006332	ENSDART00000104725	20	24	23	TCCATCAGCTCCATGAAGTAGTT	5	-	2305	2811
ENSDARG00000006332	ENSDART00000104725	20	24	23	CCCTCCGGCAGGTTGGCATTGTTT	6	-	2259	2811
ENSDARG00000006332	ENSDART00000104725	20	25	24	ACAAACCTCTCAGCAGGGTGACGAG	7	-	2518	2811
ENSDARG00000006395	ENSDART00000027836	20	2	1	TCCAGCAAACTGTGGTGGAGGGA	5	-	71	2490
ENSDARG00000006395	ENSDART00000027836	20	2	1	AAATCCAGCAAACTGTGGTGGAGGG	7	-	72	2490
ENSDARG00000006395	ENSDART00000027836	20	2	1	AAATCCAGCAAACTGTGGTGGAG	5	-	74	2490
ENSDARG00000006395	ENSDART00000027836	20	4	3	CTAACCACAGACATCGTCGTGGGC	6	-	174	2490
ENSDARG00000006395	ENSDART00000027836	20	4	3	TTCCCCACAAACACAGTGGTCGTG	6	-	264	2490
ENSDARG00000006395	ENSDART00000027836	20	4	3	GTTCCCCACAAACACAGTGGTCGTG	7	-	264	2490
ENSDARG00000006395	ENSDART00000027836	20	4	3	CCCCACAAACACAGTGGTCGTGGGG	7	-	261	2490
ENSDARG00000006395	ENSDART00000027836	20	9	8	CTCCTCTTCCAGTTTCTGTGGGG	5	-	821	2490
ENSDARG00000006395	ENSDART00000027836	20	10	9	AGCTTCCTCTCCAGTTTGCGCCGCT	7	-	1166	2490
ENSDARG00000006395	ENSDART00000027836	20	14	13	GTTCTCTTCCGGAAGCAGCATCT	5	-	1916	2490
ENSDARG00000006395	ENSDART00000027836	20	14	13	GGCTCAGGCTTTACAGGTGGCTGCC	7	-	1559	2490
ENSDARG00000006395	ENSDART00000027836	20	14	13	GGCTCAGGCTTTACAGGTGGCTGC	6	-	1560	2490
ENSDARG00000006395	ENSDART00000027836	20	14	13	GACTCACCCAGTTTGAGGCTGAGGC	7	-	1952	2490
ENSDARG00000006395	ENSDART00000027836	20	14	13	GAAGACACCGAGGGTGCCGCTGTG	6	-	1809	2490
ENSDARG00000006395	ENSDART00000027836	20	14	13	AGACTCACCCAGTTTGAGGCTGAG	6	-	1954	2490
ENSDARG00000006395	ENSDART00000027836	20	14	13	AGCAGCATCTCCTGTGGCGAGTTC	6	-	1902	2490
ENSDARG00000006395	ENSDART00000027836	20	14	13	AGCCTCTTCCTCCATCTGATGAA	5	-	1526	2490
ENSDARG00000006395	ENSDART00000027836	20	14	13	GACTCACCCAGTTTGAGGCTGAG	5	-	1954	2490
ENSDARG00000006395	ENSDART00000027836	20	15	14	TTCATCGTCATCGAAGCGGTTGAA	6	-	2035	2490
ENSDARG00000006395	ENSDART00000027836	20	15	14	ACACTCACCGTGTCGACGACGGA	5	-	2248	2490
ENSDARG00000006395	ENSDART00000027836	20	15	14	ATCGTCATCGAAGCGGTTGAAGAC	6	-	2032	2490
ENSDARG00000006395	ENSDART00000027836	20	15	14	TACTTCATCGTCATCGAAGCGGTT	6	-	2038	2490
ENSDARG00000006395	ENSDART00000027836	20	16	15	AACAAAGTCAACTAATGTGGCTTC	6	-	2329	2490
ENSDARG00000006395	ENSDART00000027836	20	16	15	AACAAAGTCAACTAATGTGGCTTCT	7	-	2328	2490
ENSDARG00000006397	ENSDART00000004601	20	1	1	AGCCGCAGCAGCGCGCGCTGTATAG	7	-	64	714
ENSDARG00000006397	ENSDART00000004601	20	1	1	GTCCGCACATGACAGCAGCCGCA	5	-	82	714
ENSDARG00000006672	ENSDART00000002773	20	6	4	AGAGACTCCAAAAGACTCTGCAGCG	7	-	314	969
ENSDARG00000006672	ENSDART00000002773	20	9	7	TGCTCAGGCAGTCTGTGGTGTTC	5	-	660	969
ENSDARG00000006672	ENSDART00000102484	20	4	4	AGAGACTCCAAAAGACTCTGCAGCG	7	-	317	972
ENSDARG00000006672	ENSDART00000102484	20	7	7	TGCTCAGGCAGTCTGTGGTGTTC	5	-	663	972
ENSDARG00000006812	ENSDART00000029894	20	1	1	GACAGCATCTGCACGGGTTAGGGC	6	+	188	1728
ENSDARG00000006812	ENSDART00000029894	20	1	1	GAACACGCAAAACGGAGATGCCAAC	7	+	51	1728
ENSDARG00000006812	ENSDART00000029894	20	1	1	AGAAGCGGCTGTCCCAGGCGGAGGA	7	+	143	1728
ENSDARG00000006812	ENSDART00000029894	20	1	1	ACACGCAAAACGGAGATGCCAAC	5	+	53	1728
ENSDARG00000006812	ENSDART00000029894	20	4	4	TGCAGCAGAAGTATCTGGAGTATTT	7	+	392	1728
ENSDARG00000006812	ENSDART00000029894	20	5	5	GAAGGCAAAGGCTGAGTGGGAGGG	6	+	540	1728
ENSDARG00000006812	ENSDART00000029894	20	5	5	GAAGGCAAAGGCTGAGTGGGAGGGA	7	+	540	1728
ENSDARG00000006812	ENSDART00000029894	20	6	6	TGCTCAGACAGGCCGTGGAGCTGCA	7	+	656	1728
ENSDARG00000006812	ENSDART00000029894	20	6	6	TGCCTCCTCGACGGCTGCAGACTCT	7	+	632	1728
ENSDARG00000006812	ENSDART00000029894	20	6	6	GTTGCCTCCTCGACGGCTGCAGAC	6	+	630	1728
ENSDARG00000006812	ENSDART00000029894	20	6	6	AGCTGCAGAGAGACCGATGCCTTT	6	+	674	1728
ENSDARG00000006812	ENSDART00000029894	20	8	8	GACGACTGCTCTGAGCTCTGGCTCT	7	+	1009	1728
ENSDARG00000006812	ENSDART00000029894	20	8	8	ATCGCCTGCGGTCCTGACGACTGC	6	+	994	1728
ENSDARG00000006812	ENSDART00000029894	20	13	13	GACGGCACAGTCCGCATCTGGGGAC	7	+	1648	1728
ENSDARG00000006812	ENSDART00000029894	20	14	14	TTCCTCAGAGAGTTGCAGCAGTA	5	+	1707	1728
ENSDARG00000006830	ENSDART00000021257	20	2	2	GAAAACAAAAGTGAGGAGGTGGAA	6	+	562	1212
ENSDARG00000006830	ENSDART00000021257	20	2	2	GAAAACAAAAGTGAGGAGGTGGA	5	+	562	1212
ENSDARG00000006830	ENSDART00000021257	20	2	2	AGAAACTGCAGTGTGGAAGAGGAG	6	+	1138	1212
ENSDARG00000006830	ENSDART00000021257	20	2	2	AGAAACTGCAGTGTGGAAGAGGAG	6	+	985	1212
ENSDARG00000006830	ENSDART00000021257	20	2	2	AGAAACTGCAGTGTGGAAGAGGAG	6	+	832	1212
ENSDARG00000006830	ENSDART00000021257	20	2	2	AGAAACTGCAGTGTGGAAGAGGAG	6	+	679	1212
ENSDARG00000006830	ENSDART00000021257	20	2	2	AGAAACTGCAGTGTGGAAGAGGAG	6	+	529	1212
ENSDARG00000006837	ENSDART00000024104	20	1	1	ATCTACCGCGGCGACTGAAGACTGT	7	-	30	1488
ENSDARG00000006837	ENSDART00000024104	20	2	2	AGCCCAGTCCAACGGGTCGGTTAA	6	-	367	1488
ENSDARG00000006837	ENSDART00000024104	20	2	2	ACCGGCTTCAGTACAGGTTGGAGTA	7	-	570	1488
ENSDARG00000006837	ENSDART00000024104	20	2	2	TGCTGCTGCTCCCGTTTCTTTTGTT	7	-	679	1488
ENSDARG00000006837	ENSDART00000024104	20	2	2	TGCTGCTCCCGTTTCTTTTGTTGAC	7	-	676	1488
ENSDARG00000006837	ENSDART00000024104	20	2	2	TGCGGCGTCTGGTCTGCAGAAGTA	6	-	208	1488
ENSDARG00000006837	ENSDART00000024104	20	3	3	CTCTTCCTCAAGCGCTGACTTGGTA	7	-	1181	1488
ENSDARG00000006837	ENSDART00000024104	20	3	3	CTAGACCGCAGGTCATTGCGCCGCT	7	-	1280	1488
ENSDARG00000006837	ENSDART00000024104	20	3	3	CCCTCCTGCCTGAGAGTTGGAGAC	6	-	928	1488
ENSDARG00000006837	ENSDART00000024104	20	3	3	CAAGTCTGCGGAGGAGCTGTTGTC	6	-	1457	1488
ENSDARG00000007127	ENSDART00000006778	20	3	3	AGAATCCACTATAGTGGTAGCAGGA	7	+	330	1185
ENSDARG00000007127	ENSDART00000006778	20	7	7	TGCAGCTACTGTTCTTATGAGCC	5	+	777	1185
ENSDARG00000007127	ENSDART00000006778	20	7	7	AGAAGCCCAGAGGCGGGGTTTAA	5	+	804	1185
ENSDARG00000007127	ENSDART00000006778	20	9	9	CTCTTCAGAGGACAGGCGGACGGA	6	+	1109	1185
ENSDARG00000007127	ENSDART00000062541	20	2	2	AGAATCCACTATAGTGGTAGCAGGA	7	+	195	570
ENSDARG00000007171	ENSDART00000007253	20	1	1	AGCTACCGCCGTATGTTTGATGC	5	-	102	681
ENSDARG00000007171	ENSDART00000007253	20	1	1	AGCTACCGCCGTATGTTTGATGCG	6	-	101	681
ENSDARG00000007171	ENSDART00000007253	20	4	4	AGAGTCCACAGGGCCTGCTGGGAT	6	-	464	681
ENSDARG00000007179	ENSDART00000046841	20	1	1	GTCTTCGGCCGAGGAGCCGCAGGC	6	+	27	3588
ENSDARG00000007179	ENSDART00000046841	20	2	2	GACGTCAGCGATCGGATGGAGGA	5	+	181	3588
ENSDARG00000007179	ENSDART00000046841	20	7	7	GAATCCAGCTTATGATGATGGTGAA	7	+	527	3588
ENSDARG00000007179	ENSDART00000046841	20	9	9	GCAGTCAGATGATGAGCAGGAGGA	6	+	699	3588
ENSDARG00000007179	ENSDART00000046841	20	9	9	AAACTCATCAAAGTGGATGATAG	5	+	781	3588
ENSDARG00000007179	ENSDART00000046841	20	10	10	CTCGCCCTCCACCAGCAGCCTTG	5	+	978	3588
ENSDARG00000007179	ENSDART00000046841	20	11	11	TTCTGCAGAGAACATGTAGCTTTG	6	+	1217	3588
ENSDARG00000007179	ENSDART00000046841	20	11	11	CACAGCAGAGCCTAGCGTGAGTA	5	+	1281	3588
ENSDARG00000007179	ENSDART00000046841	20	13	13	AGCCCAAGCTCAAGGCAGGAGGG	5	+	1499	3588
ENSDARG00000007179	ENSDART00000046841	20	15	15	ACCCAAACCCAGCTCAGTCGAGGAG	7	+	1902	3588
ENSDARG00000007179	ENSDART00000046841	20	15	15	CCCAAACCCAGCTCAGTCGAGGAG	6	+	1903	3588
ENSDARG00000007179	ENSDART00000046841	20	18	18	CTCAGCAGAAGCTGTGAGGAGTTG	6	+	2470	3588
ENSDARG00000007179	ENSDART00000046841	20	18	18	TTCAACAGCAGGCCAAGAAGGAGCG	7	+	2342	3588
ENSDARG00000007179	ENSDART00000046841	20	18	18	TGCGACACCCTCCGCTGGTGCTGTC	7	+	2888	3588
ENSDARG00000007179	ENSDART00000046841	20	18	18	ACCACCCCCTCTCCCTCTGAGGGT	6	+	2965	3588
ENSDARG00000007179	ENSDART00000046841	20	18	18	GTCTGCGACACCCTCCGCTGGTGCT	7	+	2885	3588
ENSDARG00000007179	ENSDART00000046841	20	18	18	GTAGACTCCAAACAGGATGAGAA	5	+	2647	3588
ENSDARG00000007179	ENSDART00000046841	20	18	18	ACCCCAGCATCACCAGGTGAATCT	6	+	2998	3588
ENSDARG00000007179	ENSDART00000046841	20	18	18	GACCACCCCCTCTCCCTCTGAGGGT	7	+	2964	3588
ENSDARG00000007179	ENSDART00000046841	20	18	18	CGCTCAGCAGAAGCTGTGAGGAG	5	+	2468	3588
ENSDARG00000007179	ENSDART00000046841	20	18	18	AACCCCAGCATCACCAGGTGAATCT	7	+	2997	3588
ENSDARG00000007179	ENSDART00000046841	20	19	19	TTCTCAGCATGGCCGGTGTGGTA	5	+	3201	3588
ENSDARG00000007179	ENSDART00000046841	20	20	20	TTCTGCACCTCTACTGGCTGCTGGC	7	+	3441	3588
ENSDARG00000007179	ENSDART00000046841	20	20	20	CACCTCTACTGGCTGCTGGCTTT	5	+	3446	3588
ENSDARG00000007179	ENSDART00000101752	20	2	2	AGCCCAAGCTCAAGGCAGGAGGG	5	+	155	879
ENSDARG00000007179	ENSDART00000101752	20	4	4	ACCCAAACCCAGCTCAGTCGAGGAG	7	+	558	879
ENSDARG00000007179	ENSDART00000101752	20	4	4	CCCAAACCCAGCTCAGTCGAGGAG	6	+	559	879
ENSDARG00000007221	ENSDART00000021788	20	3	2	AGCTTCTTCATGAAGGGAGAGGCA	6	-	111	1017
ENSDARG00000007221	ENSDART00000021788	20	4	3	GGCCTCCTCACAGAGACGCTTCT	5	-	254	1017
ENSDARG00000007221	ENSDART00000021788	20	6	5	ACCAACATCACAGATTTTGATGCT	6	-	559	1017
ENSDARG00000007221	ENSDART00000021788	20	6	5	CTCAAAATCGCCCTTGATGACAAC	6	-	535	1017
ENSDARG00000007221	ENSDART00000021788	20	6	5	AACACCAACATCACAGATTTTGAT	6	-	562	1017
ENSDARG00000007221	ENSDART00000021788	20	7	6	GGCTCCGTCCCAATGTAATGAGCC	6	-	627	1017
ENSDARG00000007221	ENSDART00000021788	20	7	6	TCCATCCTCCAAAGCTTCTTTGGGC	7	-	657	1017
ENSDARG00000007221	ENSDART00000021788	20	8	7	ACCTGCACAATGTGAGCTGCTGAG	6	-	948	1017
ENSDARG00000007496	ENSDART00000009196	20	1	1	AAATCAGGCGTTTAGCCGCGGAC	5	+	29	2382
ENSDARG00000007496	ENSDART00000009196	20	6	6	CACAAAGCCTGCATATGCGGTCTGT	7	+	565	2382
ENSDARG00000007496	ENSDART00000009196	20	8	8	CAAAGCCCAGAGCACTTGGGTTGAG	7	+	759	2382
ENSDARG00000007496	ENSDART00000009196	20	9	9	TCCTCAAGACCGCATGTGTGGGCA	6	+	893	2382
ENSDARG00000007496	ENSDART00000009196	20	9	9	TCCTCAAGACCGCATGTGTGGGC	5	+	893	2382
ENSDARG00000007496	ENSDART00000009196	20	9	9	CAACTCTGCCACTTGGGTCGACTTG	7	+	960	2382
ENSDARG00000007496	ENSDART00000009196	20	9	9	CAAGACCGCATGTGTGGGCAGAA	5	+	897	2382
ENSDARG00000007496	ENSDART00000009196	20	10	10	TGCAGCAGAAAGCCCAGAAGGTGCG	7	+	1145	2382
ENSDARG00000007496	ENSDART00000009196	20	11	11	GCAATCGTCCGCTTTGTTGGAGAC	6	+	1212	2382
ENSDARG00000007496	ENSDART00000009196	20	11	11	ATCGTCCGCTTTGTTGGAGACTTC	6	+	1215	2382
ENSDARG00000007496	ENSDART00000009196	20	12	12	GAATCCGCAAAACAAAGAAGAAGGG	7	+	1340	2382
ENSDARG00000007496	ENSDART00000009196	20	12	12	ATCCGCAAAACAAAGAAGAAGGG	5	+	1342	2382
ENSDARG00000007496	ENSDART00000009196	20	14	14	ACCAAACTCTTCTCAGGTTGGTTT	6	+	1684	2382
ENSDARG00000007496	ENSDART00000009196	20	15	15	CACCAAGCATGTATTGAAGACGGT	6	+	1719	2382
ENSDARG00000007496	ENSDART00000009196	20	15	15	CACACCAGATGAAACGCAGGCTAC	6	+	1692	2382
ENSDARG00000007496	ENSDART00000009196	20	18	18	TGCACCGTCAGGCTCTGTGTGAGCA	7	+	2012	2382
ENSDARG00000007496	ENSDART00000009196	20	18	18	GCACGCTCCGGGGCGCTGTGTGC	5	+	2118	2382
ENSDARG00000007582	ENSDART00000022725	20	3	3	TACAGCACATCATCTGTGGTGCA	5	-	1012	2385
ENSDARG00000007582	ENSDART00000022725	20	3	3	CACATCATCTGTGGTGCAGTTGGA	6	-	1006	2385
ENSDARG00000007582	ENSDART00000022725	20	3	3	AGCTTCTCCACCAGCTGCGGCTTC	6	-	735	2385
ENSDARG00000007582	ENSDART00000022725	20	3	3	TACATCCACCTGGTCTAAGTAGTG	6	-	643	2385
ENSDARG00000007582	ENSDART00000022725	20	3	3	AGCAGCGTCACATTAGCAGAGGAT	6	-	705	2385
ENSDARG00000007582	ENSDART00000022725	20	3	3	TCCTTCATCTGGGTTAGTGGGCGAA	7	-	824	2385
ENSDARG00000007582	ENSDART00000022725	20	3	3	ACCTGCCACGGAGGGAAGTTGGT	5	-	1141	2385
ENSDARG00000007582	ENSDART00000022725	20	3	3	ACCAGCTGCGGCTTCAGGATGAGCA	7	-	725	2385
ENSDARG00000007582	ENSDART00000022725	20	3	3	TTATCACTCAGAACCGGAGAAGAG	6	-	420	2385
ENSDARG00000007582	ENSDART00000022725	20	3	3	GTCTCAGACGAGCAGGTGGTGTC	5	-	1120	2385
ENSDARG00000007582	ENSDART00000022725	20	4	4	CACATCTCCTTTTTTAATGAGGA	5	-	1307	2385
ENSDARG00000007582	ENSDART00000022725	20	5	5	GTATCCCACATCGCAGGGGACGCA	6	-	1456	2385
ENSDARG00000007582	ENSDART00000022725	20	6	6	GGCCGCTAACAGAGTTATGGGGT	5	-	1598	2385
ENSDARG00000007582	ENSDART00000022725	20	6	6	AGCTCATGCTGCTTTTGTGGATTG	6	-	1890	2385
ENSDARG00000007582	ENSDART00000022725	20	6	6	AGCACCACATAACACTTGGGGAGAA	7	-	2321	2385
ENSDARG00000007582	ENSDART00000022725	20	6	6	AAACACACAGGGTGAAGCCGAGGCT	7	-	1816	2385
ENSDARG00000007737	ENSDART00000004934	20	3	3	ATCTCCAGCCTCTTGAGCTGGTGCA	7	-	656	2238
ENSDARG00000007737	ENSDART00000004934	20	3	3	GAAATCAACGTTGGAGACGCTGAG	6	-	508	2238
ENSDARG00000007737	ENSDART00000004934	20	3	3	TCCAAACTCTCCAGACGAGGCAGTA	7	-	560	2238
ENSDARG00000007737	ENSDART00000004934	20	3	3	TCCAGCTCCACGAGGCGATGTGGGC	7	-	314	2238
ENSDARG00000007737	ENSDART00000004934	20	3	3	AAACTCTCCAGACGAGGCAGTAAAC	7	-	557	2238
ENSDARG00000007737	ENSDART00000004934	20	4	4	ACCAACAAAGGTCATGCCGGGTCT	6	-	880	2238
ENSDARG00000007737	ENSDART00000004934	20	4	4	TGCCGCGCCACGTCTGATGTGAAC	6	-	756	2238
ENSDARG00000007737	ENSDART00000004934	20	4	4	AGAGACACAAGCTGAGGCAGAATGC	7	-	797	2238
ENSDARG00000007737	ENSDART00000004934	20	4	4	AGCTGCCGCGCCACGTCTGATGT	5	-	760	2238
ENSDARG00000007737	ENSDART00000004934	20	4	4	AGCTGCCGCGCCACGTCTGATGTG	6	-	759	2238
ENSDARG00000007737	ENSDART00000004934	20	5	5	CTCAGCGCCTCGCAGATCTGGGTCT	7	-	980	2238
ENSDARG00000007737	ENSDART00000004934	20	6	6	AGCTGCACATTTAACGTGGTTGGGT	7	-	1127	2238
ENSDARG00000007737	ENSDART00000004934	20	6	6	GCCAGCTCCTGTTTGGTGAGGTT	5	-	1174	2238
ENSDARG00000007737	ENSDART00000004934	20	6	6	AGCTGCACATTTAACGTGGTTGGG	6	-	1128	2238
ENSDARG00000007737	ENSDART00000004934	20	8	8	TGCCACTGCCATCCTCTGCATGT	5	-	1397	2238
ENSDARG00000007737	ENSDART00000004934	20	9	9	CTCGGCTCCCAACTGTGCGGTTTG	6	-	1456	2238
ENSDARG00000007737	ENSDART00000004934	20	9	9	CTCGGCTCCCAACTGTGCGGTTTGC	7	-	1455	2238
ENSDARG00000007737	ENSDART00000004934	20	10	10	GTTCACCTCCAGCACTTTGATGAA	6	-	1639	2238
ENSDARG00000007737	ENSDART00000004934	20	10	10	ACCTCCAGCACTTTGATGAAGAG	5	-	1636	2238
ENSDARG00000007737	ENSDART00000004934	20	10	10	TTCACCTCCAGCACTTTGATGAA	5	-	1639	2238
ENSDARG00000007737	ENSDART00000004934	20	11	11	ACCTTCTGCTGAATGGATGACTCT	6	-	1668	2238
ENSDARG00000007737	ENSDART00000004934	20	11	11	GTAACCCCAGCACCTTCTGCTGAA	6	-	1679	2238
ENSDARG00000007737	ENSDART00000004934	20	12	12	ACCTCCACCTCTGGACTGTGGAGCA	7	-	1778	2238
ENSDARG00000007737	ENSDART00000004934	20	12	12	ACACTCACCAGTTGCTGGAGCAGTG	7	-	1886	2238
ENSDARG00000007737	ENSDART00000004934	20	12	12	CTCCACCTCTGGACTGTGGAGCA	5	-	1778	2238
ENSDARG00000007737	ENSDART00000004934	20	12	12	CACTCACCAGTTGCTGGAGCAGTG	6	-	1886	2238
ENSDARG00000007737	ENSDART00000004934	20	13	13	GGCCACTTCAGAATGGCTGAATGC	6	-	1902	2238
ENSDARG00000007737	ENSDART00000004934	20	14	14	TGCTCACCATTTTTGCTGCAGAC	5	-	2038	2238
ENSDARG00000007737	ENSDART00000004934	20	15	15	GTCTGCGCACGTCGCTGTGCGTTT	6	-	2126	2238
ENSDARG00000007737	ENSDART00000104112	20	3	3	GAAATCAACGTTGGAGACGCTGAG	6	-	508	2238
ENSDARG00000007737	ENSDART00000104112	20	3	3	ATCTCCAGCCTCTTGAGCTGGTGCA	7	-	656	2238
ENSDARG00000007737	ENSDART00000104112	20	3	3	TCCAAACTCTCCAGACGAGGCAGTA	7	-	560	2238
ENSDARG00000007737	ENSDART00000104112	20	3	3	TCCAGCTCCACGAGGCGATGTGGGC	7	-	314	2238
ENSDARG00000007737	ENSDART00000104112	20	3	3	AAACTCTCCAGACGAGGCAGTAAAC	7	-	557	2238
ENSDARG00000007737	ENSDART00000104112	20	4	4	TGCCGCGCCACGTCTGATGTGAAC	6	-	756	2238
ENSDARG00000007737	ENSDART00000104112	20	4	4	AGCTGCCGCGCCACGTCTGATGTG	6	-	759	2238
ENSDARG00000007737	ENSDART00000104112	20	4	4	AGCTGCCGCGCCACGTCTGATGT	5	-	760	2238
ENSDARG00000007737	ENSDART00000104112	20	4	4	AGAGACACAAGCTGAGGCAGAATGC	7	-	797	2238
ENSDARG00000007737	ENSDART00000104112	20	4	4	ACCAACAAAGGTCATGCCGGGTCT	6	-	880	2238
ENSDARG00000007737	ENSDART00000104112	20	5	5	CTCAGCGCCTCGCAGATCTGGGTCT	7	-	980	2238
ENSDARG00000007737	ENSDART00000104112	20	6	6	AGCTGCACATTTAACGTGGTTGGGT	7	-	1127	2238
ENSDARG00000007737	ENSDART00000104112	20	6	6	AGCTGCACATTTAACGTGGTTGGG	6	-	1128	2238
ENSDARG00000007737	ENSDART00000104112	20	6	6	GCCAGCTCCTGTTTGGTGAGGTT	5	-	1174	2238
ENSDARG00000007737	ENSDART00000104112	20	8	8	TGCCACTGCCATCCTCTGCATGT	5	-	1397	2238
ENSDARG00000007737	ENSDART00000104112	20	9	9	CTCGGCTCCCAACTGTGCGGTTTG	6	-	1456	2238
ENSDARG00000007737	ENSDART00000104112	20	9	9	CTCGGCTCCCAACTGTGCGGTTTGC	7	-	1455	2238
ENSDARG00000007737	ENSDART00000104112	20	10	10	GTTCACCTCCAGCACTTTGATGAA	6	-	1639	2238
ENSDARG00000007737	ENSDART00000104112	20	10	10	ACCTCCAGCACTTTGATGAAGAG	5	-	1636	2238
ENSDARG00000007737	ENSDART00000104112	20	10	10	TTCACCTCCAGCACTTTGATGAA	5	-	1639	2238
ENSDARG00000007737	ENSDART00000104112	20	11	11	GTAACCCCAGCACCTTCTGCTGAA	6	-	1679	2238
ENSDARG00000007737	ENSDART00000104112	20	11	11	ACCTTCTGCTGAATGGATGACTCT	6	-	1668	2238
ENSDARG00000007737	ENSDART00000104112	20	12	12	ACCTCCACCTCTGGACTGTGGAGCA	7	-	1778	2238
ENSDARG00000007737	ENSDART00000104112	20	12	12	CTCCACCTCTGGACTGTGGAGCA	5	-	1778	2238
ENSDARG00000007737	ENSDART00000104112	20	12	12	CACTCACCAGTTGCTGGAGCAGTG	6	-	1886	2238
ENSDARG00000007737	ENSDART00000104112	20	12	12	ACACTCACCAGTTGCTGGAGCAGTG	7	-	1886	2238
ENSDARG00000007737	ENSDART00000104112	20	13	13	GGCCACTTCAGAATGGCTGAATGC	6	-	1902	2238
ENSDARG00000007737	ENSDART00000104112	20	14	14	TGCTCACCATTTTTGCTGCAGAC	5	-	2038	2238
ENSDARG00000007737	ENSDART00000104112	20	15	15	GTCTGCGCACGTCGCTGTGCGTTT	6	-	2126	2238
ENSDARG00000007774	ENSDART00000036546	20	3	3	TACCCACTCAGAGGTCGGGTTTTCT	7	-	449	1044
ENSDARG00000007774	ENSDART00000036546	20	4	4	AACTGCTTCAAGGCATTTGATGGG	6	-	511	1044
ENSDARG00000007774	ENSDART00000036546	20	5	5	CAACACCACGTGATGGAAGTGGTG	6	-	613	1044
ENSDARG00000007774	ENSDART00000036546	20	5	5	GTCAAACACCAACTCGCTGAGTGT	6	-	718	1044
ENSDARG00000007774	ENSDART00000036546	20	6	6	GTTGGCGTCTTTGGGGACTGGTGC	6	-	1007	1044
ENSDARG00000007776	ENSDART00000012369	20	3	3	TGCAGCCCCAGCACCGATGCTGTG	6	+	793	825
ENSDARG00000007776	ENSDART00000012369	20	3	3	TACATCGACATGAGGGATGTGTGC	6	+	619	825
ENSDARG00000007776	ENSDART00000012369	20	3	3	GCAGCCCCAGCACCGATGCTGTG	5	+	794	825
ENSDARG00000007776	ENSDART00000012369	20	3	3	GAAGACAAAGCGGCTCTGCAGTC	5	+	337	825
ENSDARG00000007776	ENSDART00000012369	20	3	3	GAAACCGACGGTCTGGAAGAAGAC	6	+	319	825
ENSDARG00000007776	ENSDART00000012369	20	3	3	AGCTCCAGCCCAGGAGGAGAAGAC	6	+	462	825
ENSDARG00000007776	ENSDART00000012369	20	3	3	ACCAGCTCCAGCCCAGGAGGAGAA	6	+	459	825
ENSDARG00000007776	ENSDART00000012369	20	3	3	AAACTCACAGAGGAGACGGAGAA	5	+	430	825
ENSDARG00000007783	ENSDART00000020099	20	4	4	CGCAAACGCTACAGGTGGAGCGGTA	7	+	296	1455
ENSDARG00000007783	ENSDART00000020099	20	6	6	CACTCCAGAGCAGGGTGATGTGGTC	7	+	450	1455
ENSDARG00000007783	ENSDART00000020099	20	6	6	CTCCACTCCAGAGCAGGGTGATGT	6	+	447	1455
ENSDARG00000007783	ENSDART00000020099	20	6	6	CTCCACTCCAGAGCAGGGTGATGTG	7	+	447	1455
ENSDARG00000007783	ENSDART00000020099	20	7	7	AGATTCCCAGAGAAACTCTGAAGCT	7	+	656	1455
ENSDARG00000007783	ENSDART00000103836	20	3	3	CGCAAACGCTACAGGTGGAGCGGTA	7	+	182	1332
ENSDARG00000007783	ENSDART00000103836	20	5	5	CTCCACTCCAGAGCAGGGTGATGTG	7	+	333	1332
ENSDARG00000007783	ENSDART00000103836	20	5	5	CTCCACTCCAGAGCAGGGTGATGT	6	+	333	1332
ENSDARG00000007783	ENSDART00000103836	20	5	5	CACTCCAGAGCAGGGTGATGTGGTC	7	+	336	1332
ENSDARG00000007783	ENSDART00000103836	20	6	6	AGATTCCCAGAGAAACTCTGAAGCT	7	+	542	1332
ENSDARG00000007823	ENSDART00000022060	20	2	1	GACCCAAACCAGGGTGCTGAAGCA	6	-	14	606
ENSDARG00000007823	ENSDART00000022060	20	4	3	AACCCAGCCCCTGGAGTGTGGATTC	7	-	538	606
ENSDARG00000007869	ENSDART00000022694	20	1	1	CACTCACCCGCGCTGGAGGATGCA	6	+	145	1635
ENSDARG00000007869	ENSDART00000022694	20	1	1	CACTCACCCGCGCTGGAGGATGC	5	+	145	1635
ENSDARG00000007869	ENSDART00000022694	20	1	1	CTCACCCGCGCTGGAGGATGCAGAT	7	+	147	1635
ENSDARG00000007869	ENSDART00000022694	20	1	1	GTTTCACTCACCCGCGCTGGAGGA	6	+	141	1635
ENSDARG00000007869	ENSDART00000022694	20	1	1	AAACCAAACTGCTTCCTCTTGAGGA	7	+	98	1635
ENSDARG00000007869	ENSDART00000022694	20	3	3	AGCTTCCCAACCCGGTTTTGGAG	5	+	428	1635
ENSDARG00000007869	ENSDART00000022694	20	3	3	AGCTTCCCAACCCGGTTTTGGAGAG	7	+	428	1635
ENSDARG00000007869	ENSDART00000022694	20	3	3	AGAAACAAAGGATCAGCAGAGGTA	6	+	491	1635
ENSDARG00000007869	ENSDART00000022694	20	3	3	CCCAGCTTCCCAACCCGGTTTTGGA	7	+	425	1635
ENSDARG00000007869	ENSDART00000022694	20	4	4	AGACACAGCAGCTGATGCGAGTTT	6	+	683	1635
ENSDARG00000007869	ENSDART00000022694	20	5	5	GACAACAAAAAGAAGGAGCTGAT	5	+	982	1635
ENSDARG00000007869	ENSDART00000022694	20	6	6	CGCAGCGTCCTAACCAGGTGGTGAA	7	+	1214	1635
ENSDARG00000007869	ENSDART00000022694	20	6	6	TCCAGCCTCTAAAAATGAAGCTTTT	7	+	1121	1635
ENSDARG00000007869	ENSDART00000022694	20	6	6	GGCCAATGCCAAGAGGGAGATGGT	6	+	1401	1635
ENSDARG00000007869	ENSDART00000022694	20	6	6	AGCCTCTAAAAATGAAGCTTTTGGA	7	+	1124	1635
ENSDARG00000007886	ENSDART00000023064	20	2	2	TGCCGCGGCTGCTTGAAGAGGAC	5	-	256	1023
ENSDARG00000007886	ENSDART00000023064	20	2	2	GGCACCAGCTGCTGAGGATGTTGGA	7	-	316	1023
ENSDARG00000007886	ENSDART00000023064	20	2	2	GCCCTCTGCCTCGCTGGAGCCGTA	6	-	151	1023
ENSDARG00000007886	ENSDART00000023064	20	2	2	CGCGGCTGCTTGAAGAGGACGCA	5	-	253	1023
ENSDARG00000007886	ENSDART00000023064	20	2	2	ACCGTCAGCGCCAGGATGCGGTT	5	-	217	1023
ENSDARG00000007886	ENSDART00000023064	20	2	2	ACCAGCTGCTGAGGATGTTGGAGAG	7	-	313	1023
ENSDARG00000007886	ENSDART00000023064	20	3	3	AGCGCCAAACTGAGCGATGGTGAA	6	-	811	1023
ENSDARG00000007886	ENSDART00000023064	20	3	3	TTCTGCACAGGCGTCTGCGCAGGC	6	-	1005	1023
ENSDARG00000007886	ENSDART00000023064	20	3	3	ACAGACAGCAACACGGCGTGAAAC	6	-	756	1023
ENSDARG00000007886	ENSDART00000023064	20	3	3	GGCGTCTGCGCAGGCCGCTTGGTGC	7	-	995	1023
ENSDARG00000007886	ENSDART00000023064	20	3	3	GACATCTTATATTTGAAGAGGTT	5	-	613	1023
ENSDARG00000007886	ENSDART00000023064	20	3	3	GAAGACATCTTATATTTGAAGAG	5	-	616	1023
ENSDARG00000007886	ENSDART00000099568	20	9	9	GCCCTCTGCCTCGCTGGAGCCGTA	6	-	412	1284
ENSDARG00000007886	ENSDART00000099568	20	9	9	CGCGGCTGCTTGAAGAGGACGCA	5	-	514	1284
ENSDARG00000007886	ENSDART00000099568	20	9	9	ACCGTCAGCGCCAGGATGCGGTT	5	-	478	1284
ENSDARG00000007886	ENSDART00000099568	20	9	9	ACCAGCTGCTGAGGATGTTGGAGAG	7	-	574	1284
ENSDARG00000007886	ENSDART00000099568	20	9	9	TGCCGCGGCTGCTTGAAGAGGAC	5	-	517	1284
ENSDARG00000007886	ENSDART00000099568	20	9	9	GGCACCAGCTGCTGAGGATGTTGGA	7	-	577	1284
ENSDARG00000007886	ENSDART00000099568	20	10	10	TTCTGCACAGGCGTCTGCGCAGGC	6	-	1266	1284
ENSDARG00000007886	ENSDART00000099568	20	10	10	ACAGACAGCAACACGGCGTGAAAC	6	-	1017	1284
ENSDARG00000007886	ENSDART00000099568	20	10	10	GGCGTCTGCGCAGGCCGCTTGGTGC	7	-	1256	1284
ENSDARG00000007886	ENSDART00000099568	20	10	10	GACATCTTATATTTGAAGAGGTT	5	-	874	1284
ENSDARG00000007886	ENSDART00000099568	20	10	10	GAAGACATCTTATATTTGAAGAG	5	-	877	1284
ENSDARG00000007886	ENSDART00000099568	20	10	10	AGCGCCAAACTGAGCGATGGTGAA	6	-	1072	1284
ENSDARG00000007901	ENSDART00000014485	20	5	5	CTCAAACACCTGCCTGCAGCCTGC	6	-	502	2262
ENSDARG00000007901	ENSDART00000014485	20	6	6	ACCATCACAAGTGCTCTGAGGTT	5	-	619	2262
ENSDARG00000007901	ENSDART00000014485	20	8	8	GCATCACTCTCCACCAGACGCAGGT	7	-	1016	2262
ENSDARG00000007901	ENSDART00000014485	20	8	8	TTAATCCACAGGTAGATGTAGCG	5	-	1120	2262
ENSDARG00000007901	ENSDART00000014485	20	8	8	GTACACTTCTCTAACTGTGTCTGC	6	-	1045	2262
ENSDARG00000007901	ENSDART00000014485	20	10	10	GGCCTCGTCTTGCATTTTGGAGGT	6	-	1289	2262
ENSDARG00000007901	ENSDART00000014485	20	11	11	GTCAAACTCTCTCAGCTGCAGCT	5	-	1373	2262
ENSDARG00000007901	ENSDART00000014485	20	11	11	ACCTCCGGCATGTCCAGTCGTGGCT	7	-	1532	2262
ENSDARG00000007901	ENSDART00000014485	20	11	11	TGCAGCTCCAGCTCGATGTAGCC	5	-	1357	2262
ENSDARG00000007901	ENSDART00000014485	20	12	12	ACAGTCCTCGTGTGTTGTCGTATTC	7	-	1597	2262
ENSDARG00000007901	ENSDART00000014485	20	13	13	GTCTGCACCTCTGCACGCGGTCTTC	7	-	1699	2262
ENSDARG00000007901	ENSDART00000014485	20	13	13	TTCACCTTCTCCGGCAGGAGTTTGC	7	-	1850	2262
ENSDARG00000007901	ENSDART00000014485	20	13	13	TTCTCCGGCAGGAGTTTGCGGAC	5	-	1846	2262
ENSDARG00000007901	ENSDART00000014485	20	13	13	TTCTTCACCTTCTCCGGCAGGAGTT	7	-	1853	2262
ENSDARG00000007901	ENSDART00000014485	20	13	13	ACCTTCTCCGGCAGGAGTTTGCG	5	-	1849	2262
ENSDARG00000007901	ENSDART00000014485	20	14	14	TCCTCCTCCTGCTGCTGCTGTTTCT	7	-	2003	2262
ENSDARG00000007901	ENSDART00000014485	20	14	14	TCCTCCTCCTCCTGCTGCTGCTGTT	7	-	2006	2262
ENSDARG00000007901	ENSDART00000014485	20	14	14	GTTGGCAGCGTCCTCGGGGAAGAT	6	-	1939	2262
ENSDARG00000007901	ENSDART00000014485	20	14	14	AGCGTCCTCGGGGAAGATGTAGTC	6	-	1933	2262
ENSDARG00000007901	ENSDART00000014485	20	14	14	ATCCTCCTCCTCCTGCTGCTGCT	5	-	2009	2262
ENSDARG00000007901	ENSDART00000014485	20	14	14	CTCCTCCTCCTGCTGCTGCTGTT	5	-	2006	2262
ENSDARG00000007901	ENSDART00000014485	20	14	14	GCAGGCTCCTGCTCCTCTGCTTCT	6	-	2106	2262
ENSDARG00000007901	ENSDART00000014485	20	14	14	GGCAGCGTCCTCGGGGAAGATGTA	6	-	1936	2262
ENSDARG00000007901	ENSDART00000014485	20	14	14	GTCTTCATCACTCTCGCTGTCGGA	6	-	2203	2262
ENSDARG00000008029	ENSDART00000026234	20	2	2	TCCTTCAAACAATTCTCTTTGGGA	6	-	73	2004
ENSDARG00000008029	ENSDART00000026234	20	5	5	AGAAACCCAGTGCATGGAGAAGCT	6	-	392	2004
ENSDARG00000008029	ENSDART00000026234	20	6	6	GACTCATAATCATAGGGTGTGTTC	6	-	531	2004
ENSDARG00000008029	ENSDART00000026234	20	7	7	TCCAGCAGAGTGTGGGTTGCAGCT	6	-	702	2004
ENSDARG00000008029	ENSDART00000026234	20	9	9	CCCTACAAACTCTTTAGATGAATTC	7	-	1347	2004
ENSDARG00000008029	ENSDART00000026234	20	9	9	GAATTCACCCTGCCATTTGGATAA	6	-	1329	2004
ENSDARG00000008029	ENSDART00000026234	20	10	10	GCCAAACTCTGGTCCTCTGAAGCA	6	-	1570	2004
ENSDARG00000008029	ENSDART00000026234	20	11	11	CGCTCCTCCATTTTGGCAGGGGTT	6	-	1810	2004
ENSDARG00000008029	ENSDART00000026234	20	12	12	TCCTCCGTCAATGTGTTGTTTCT	5	-	1910	2004
ENSDARG00000008060	ENSDART00000002481	20	3	3	GTTGACAGCTTGTATGAAGATGAA	6	+	187	1734
ENSDARG00000008060	ENSDART00000002481	20	4	4	TACCACGCCAAGTATTATGAGAA	5	+	937	1734
ENSDARG00000008060	ENSDART00000002481	20	4	4	GTACCACGCCAAGTATTATGAGAA	6	+	936	1734
ENSDARG00000008060	ENSDART00000002481	20	4	4	GCAGTCACACGGAGGATTTGCAGAA	7	+	1118	1734
ENSDARG00000008060	ENSDART00000002481	20	4	4	CTCTTCAGAGAAAAGCAGAAGAG	5	+	656	1734
ENSDARG00000008060	ENSDART00000002481	20	4	4	CTATTCCACTTGCTTAGACGTGGCA	7	+	294	1734
ENSDARG00000008060	ENSDART00000002481	20	4	4	CAACTATTCCACTTGCTTAGACGTG	7	+	291	1734
ENSDARG00000008119	ENSDART00000015928	20	1	1	GCCATCACATCACAGCCGACGGC	5	+	203	1218
ENSDARG00000008119	ENSDART00000015928	20	2	2	TGCTGCAGATGATGATCTTGAGGA	6	+	339	1218
ENSDARG00000008119	ENSDART00000015928	20	2	2	GAAGGCTACATTCCTGCAGATAAC	6	+	397	1218
ENSDARG00000008119	ENSDART00000015928	20	3	3	GTATTCAACAGTAAAGGTGTCGAT	6	+	529	1218
ENSDARG00000008119	ENSDART00000015928	20	3	3	GTTTCAGACCTATCTTTAGCAGTC	6	+	470	1218
ENSDARG00000008119	ENSDART00000015928	20	4	4	AGCCCCGCATCGATCTGAAGTTGCT	7	+	543	1218
ENSDARG00000008119	ENSDART00000015928	20	4	4	CCCCGCATCGATCTGAAGTTGCT	5	+	545	1218
ENSDARG00000008119	ENSDART00000015928	20	4	4	CTAGGCGCACGAAAGAGGCGGGT	5	+	652	1218
ENSDARG00000008119	ENSDART00000015928	20	4	4	CTAGGCGCACGAAAGAGGCGGGTGT	7	+	652	1218
ENSDARG00000008119	ENSDART00000015928	20	4	4	TGCAGCCCCGCATCGATCTGAAGTT	7	+	540	1218
ENSDARG00000008119	ENSDART00000015928	20	5	5	CAACACCTCTCAGCTCTTTTGGG	5	+	752	1218
ENSDARG00000008119	ENSDART00000015928	20	5	5	CAACACCTCTCAGCTCTTTTGGGAG	7	+	752	1218
ENSDARG00000008119	ENSDART00000015928	20	5	5	TTCAACACCTCTCAGCTCTTTTGGG	7	+	750	1218
ENSDARG00000008184	ENSDART00000041476	20	4	4	AGAAGCTGCTGGATTTTGTCTCT	5	-	274	2358
ENSDARG00000008184	ENSDART00000041476	20	5	5	AGCGACTTCTCTGAGTTTTGCAGGC	7	-	365	2358
ENSDARG00000008184	ENSDART00000041476	20	5	5	CTCAGCGACTTCTCTGAGTTTTGC	6	-	369	2358
ENSDARG00000008184	ENSDART00000041476	20	5	5	GAACTCAGCGACTTCTCTGAGTTT	6	-	372	2358
ENSDARG00000008184	ENSDART00000041476	20	6	6	TGCTCCCACTGACTCTGCATTTTCT	7	-	434	2358
ENSDARG00000008184	ENSDART00000041476	20	6	6	ATCTGCTCCCACTGACTCTGCATTT	7	-	437	2358
ENSDARG00000008184	ENSDART00000041476	20	10	10	GCAGCCTCCCAGTCGGTTGAGCT	5	-	857	2358
ENSDARG00000008184	ENSDART00000041476	20	10	10	CGCAGCCTCCCAGTCGGTTGAGCT	6	-	857	2358
ENSDARG00000008184	ENSDART00000041476	20	13	13	TTCTCCTTCTGCTGGTAGAGTTC	5	-	1186	2358
ENSDARG00000008184	ENSDART00000041476	20	16	16	TCCACCAGAGTTCTCTCTGAGGCG	6	-	1431	2358
ENSDARG00000008184	ENSDART00000041476	20	16	16	CACTTCTGCCGAAGAGTGGCTGAT	6	-	1467	2358
ENSDARG00000008184	ENSDART00000041476	20	17	17	CACCTCTGCGCTGTGGCGGCGGC	5	-	1569	2358
ENSDARG00000008184	ENSDART00000041476	20	17	17	CACCTCTGCGCTGTGGCGGCGGCA	6	-	1568	2358
ENSDARG00000008184	ENSDART00000041476	20	18	18	CGCGTCGCCCTACAGGTGCTGAT	5	-	1668	2358
ENSDARG00000008184	ENSDART00000041476	20	18	18	CCCCGCCGCTCACAGGAGATGGA	5	-	1602	2358
ENSDARG00000008184	ENSDART00000041476	20	18	18	AGCCCCGCCGCTCACAGGAGATGGA	7	-	1602	2358
ENSDARG00000008184	ENSDART00000041476	20	21	21	AGACTCTACAGGCTCAGATGAGGCC	7	-	1863	2358
ENSDARG00000008184	ENSDART00000041476	20	22	22	GGCTTCAGCGGGACGTTAGGTGGA	6	-	1950	2358
ENSDARG00000008184	ENSDART00000041476	20	23	23	CTCCTCGTCTCCATCTCTGGAGCT	6	-	2320	2358
ENSDARG00000008184	ENSDART00000060505	20	1	1	TTCATCTGCTTGTGTTGTGTTTTC	6	-	250	1422
ENSDARG00000008184	ENSDART00000060505	20	1	1	TCCTCAGTCTCCAGTGTGTTTTT	5	-	76	1422
ENSDARG00000008184	ENSDART00000060505	20	2	2	CTCCTCGACCAATGGGACGCTGTC	6	-	694	1422
ENSDARG00000008184	ENSDART00000060505	20	2	2	GTCTTCATCTCCCGAGCAGACTTC	6	-	453	1422
ENSDARG00000008184	ENSDART00000060505	20	2	2	TACATCTCCGGTTGCTTCTGCAGTC	7	-	593	1422
ENSDARG00000008184	ENSDART00000060505	20	2	2	ACATCATACATCTCCGGTTGCTTCT	7	-	599	1422
ENSDARG00000008184	ENSDART00000060505	20	2	2	TTCCTCCTCGACCAATGGGACGCT	6	-	697	1422
ENSDARG00000008184	ENSDART00000060505	20	3	3	GGCTTCTCCAAAATAGCATGAGGT	6	-	987	1422
ENSDARG00000008184	ENSDART00000060505	20	7	7	AGAAGCTGCTGGATTTTGTCTCT	5	-	1360	1422
ENSDARG00000008209	ENSDART00000044397	20	3	1	CGCATCCACCTCCATCTGGAGAA	5	-	2	3771
ENSDARG00000008209	ENSDART00000044397	20	5	3	ACCATCACAGCCAGGTGTGGGAC	5	-	89	3771
ENSDARG00000008209	ENSDART00000044397	20	6	4	TCCTGCAGAGGTTTCTCTTGGGTT	6	-	183	3771
ENSDARG00000008209	ENSDART00000044397	20	7	5	TGCTGCTGCTCGGAATGATGTTGCA	7	-	1151	3771
ENSDARG00000008209	ENSDART00000044397	20	7	5	TGCGCCATCATGATGGAGTCGGG	5	-	1583	3771
ENSDARG00000008209	ENSDART00000044397	20	7	5	TCCAGCAGCGACAGGTTGCCTTT	5	-	1417	3771
ENSDARG00000008209	ENSDART00000044397	20	7	5	GTCATCATCTTCTCCGGCGCTGTT	6	-	811	3771
ENSDARG00000008209	ENSDART00000044397	20	7	5	GGCTGCTGCTGCTCGGAATGATGT	6	-	1155	3771
ENSDARG00000008209	ENSDART00000044397	20	7	5	CTCATCCCCGTCCTGGGCGCAGCT	6	-	1342	3771
ENSDARG00000008209	ENSDART00000044397	20	7	5	TTCTCCGGCGCTGTTGGAGGAGCT	6	-	802	3771
ENSDARG00000008209	ENSDART00000044397	20	7	5	CACTGCTGCTCTGCCTTGGGCTGTG	7	-	1543	3771
ENSDARG00000008209	ENSDART00000044397	20	7	5	ATCAAATTCACCATGTCTGAGTA	5	-	1273	3771
ENSDARG00000008209	ENSDART00000044397	20	7	5	AAATTCACCATGTCTGAGTAGTTC	6	-	1269	3771
ENSDARG00000008209	ENSDART00000044397	20	7	5	ACACTCAACTCTCCTTTGTGGCA	5	-	865	3771
ENSDARG00000008209	ENSDART00000044397	20	7	5	ATCAAATTCACCATGTCTGAGTAG	6	-	1272	3771
ENSDARG00000008209	ENSDART00000044397	20	7	5	ATCATCTTCTCCGGCGCTGTTGGA	6	-	808	3771
ENSDARG00000008209	ENSDART00000044397	20	7	5	ATCTTCTCCGGCGCTGTTGGAGGA	6	-	805	3771
ENSDARG00000008209	ENSDART00000044397	20	8	6	GCCATCACAACCCGGGGTTGGAC	5	-	1658	3771
ENSDARG00000008209	ENSDART00000044397	20	10	8	GCCGTCGCAGGAGTGATGTTTCT	5	-	1901	3771
ENSDARG00000008209	ENSDART00000044397	20	12	10	TGCTGCTGCTGGGAGCGTAGCTGCT	7	-	2224	3771
ENSDARG00000008209	ENSDART00000044397	20	12	10	AGCTCAGGCTGCTGCTGCTGCTGGG	7	-	2236	3771
ENSDARG00000008209	ENSDART00000044397	20	12	10	TCCTCCACAGCTCAGGCTGCTGCT	6	-	2245	3771
ENSDARG00000008209	ENSDART00000044397	20	12	10	TGCTGCTGCTGCTGGGAGCGTAG	5	-	2229	3771
ENSDARG00000008209	ENSDART00000044397	20	12	10	CTCCACAGCTCAGGCTGCTGCTGCT	7	-	2242	3771
ENSDARG00000008209	ENSDART00000044397	20	12	10	CTCCTCCACAGCTCAGGCTGCTGCT	7	-	2245	3771
ENSDARG00000008209	ENSDART00000044397	20	12	10	GGCGGCTTCCATGTCGTGCGTGTAG	7	-	2340	3771
ENSDARG00000008209	ENSDART00000044397	20	16	14	TTCACCTTCTGTGCGAGGCGTAGTT	7	-	2914	3771
ENSDARG00000008209	ENSDART00000044397	20	16	14	ATCTTCACCTTCTGTGCGAGGCG	5	-	2919	3771
ENSDARG00000008209	ENSDART00000044397	20	16	14	AGAGCCATCACAGCCGGGAGTGGGA	7	-	2874	3771
ENSDARG00000008209	ENSDART00000044397	20	16	14	TTCACCTTCTGTGCGAGGCGTAG	5	-	2916	3771
ENSDARG00000008209	ENSDART00000044397	20	16	14	GCCATCACAGCCGGGAGTGGGAC	5	-	2873	3771
ENSDARG00000008209	ENSDART00000044397	20	18	16	TCCGTCGCACCCTGGAGTGGGGC	5	-	3179	3771
ENSDARG00000008209	ENSDART00000044397	20	19	17	TTCAACCCCAGTCATTCTGGCTTT	6	-	3277	3771
ENSDARG00000008209	ENSDART00000044397	20	20	18	GACTCATTCAGGTCTTTGATTTC	5	-	3370	3771
ENSDARG00000008209	ENSDART00000044397	20	23	21	CAAAGCTACACTTGGATGCCTTG	5	-	3766	3771
ENSDARG00000008249	ENSDART00000022572	20	1	1	TCCTTCTACTGGCTGGGTTTGTTC	6	+	46	2691
ENSDARG00000008249	ENSDART00000022572	20	1	1	TCCTTCTACTGGCTGGGTTTGTT	5	+	46	2691
ENSDARG00000008249	ENSDART00000022572	20	2	2	GCCATCAGCTGGGCGGTGTGGCC	5	+	581	2691
ENSDARG00000008249	ENSDART00000022572	20	2	2	GACTTCCACAAGACAGGCGTATTG	6	+	805	2691
ENSDARG00000008249	ENSDART00000022572	20	2	2	ATCGCCAACGTGACGGCAGCTGGG	6	+	952	2691
ENSDARG00000008249	ENSDART00000022572	20	3	3	TACGGCTCCTGCCTGGTGTTTGC	5	+	1288	2691
ENSDARG00000008249	ENSDART00000022572	20	3	3	TACGGCTCCTGCCTGGTGTTTGCC	6	+	1288	2691
ENSDARG00000008249	ENSDART00000022572	20	3	3	TTCGTCATCCTTCCGGTGTTTTT	5	+	2530	2691
ENSDARG00000008249	ENSDART00000022572	20	3	3	TTCGTCATCCTTCCGGTGTTTTTG	6	+	2530	2691
ENSDARG00000008249	ENSDART00000022572	20	3	3	GTTTTCAACCCAACGTTTGTGTTC	6	+	2056	2691
ENSDARG00000008249	ENSDART00000022572	20	3	3	GTCACCTCCGTGGAGTTGGGCGTCT	7	+	2206	2691
ENSDARG00000008249	ENSDART00000022572	20	3	3	GGCTCCTGCCTGGTGTTTGCCGGG	6	+	1291	2691
ENSDARG00000008249	ENSDART00000022572	20	3	3	AACACCTACGTCAAGCCTTTTGT	5	+	1510	2691
ENSDARG00000008249	ENSDART00000022572	20	3	3	ACCGTCACCTCCGTGGAGTTGGG	5	+	2203	2691
ENSDARG00000008249	ENSDART00000022572	20	3	3	ACCGTCACCTCCGTGGAGTTGGGC	6	+	2203	2691
ENSDARG00000008249	ENSDART00000022572	20	3	3	ACCTACGTCAAGCCTTTTGTGGTG	6	+	1513	2691
ENSDARG00000008249	ENSDART00000022572	20	3	3	AGCGACGGCCATGATCTGTCTAC	5	+	1411	2691
ENSDARG00000008249	ENSDART00000022572	20	3	3	CAATTCGCCCAGTGTGTCGTTTGC	6	+	1623	2691
ENSDARG00000008568	ENSDART00000028862	20	2	2	GAAGACCACCGGCATGTGGTGGA	5	+	150	507
ENSDARG00000008568	ENSDART00000028862	20	2	2	GAAGACCACCGGCATGTGGTGGAA	6	+	150	507
ENSDARG00000008568	ENSDART00000028862	20	3	3	ACCAACAAAATCAGTCTGGTGAA	5	+	271	507
ENSDARG00000008568	ENSDART00000028862	20	4	4	GCCATCTACCCCATGGAGGTGAG	5	+	499	507
ENSDARG00000008568	ENSDART00000033325	20	1	1	TTCGTCTTCACCGAGTCGCATTG	5	+	31	1431
ENSDARG00000008568	ENSDART00000033325	20	1	1	GTCTTCACCGAGTCGCATTGTTT	5	+	34	1431
ENSDARG00000008568	ENSDART00000033325	20	2	2	AACTCAGGCTGACCTTTAAGAGTCT	7	+	281	1431
ENSDARG00000008568	ENSDART00000033325	20	4	4	TCCTCCAGCATTGATGTGGATGGA	6	+	403	1431
ENSDARG00000008568	ENSDART00000033325	20	5	5	GAAGACCACCGGCATGTGGTGGA	5	+	576	1431
ENSDARG00000008568	ENSDART00000033325	20	5	5	GAAGACCACCGGCATGTGGTGGAA	6	+	576	1431
ENSDARG00000008568	ENSDART00000033325	20	6	6	ACCAACAAAATCAGTCTGGTGAA	5	+	697	1431
ENSDARG00000008568	ENSDART00000033325	20	7	7	GCCATCTACCCCATGGAGGTGAG	5	+	925	1431
ENSDARG00000008568	ENSDART00000033325	20	8	8	TGCCAAAAAGATCCTGAGGAAGGA	6	+	1002	1431
ENSDARG00000008573	ENSDART00000013453	20	3	1	GGCCACCGCTCATGTGGAGAGGGC	6	+	282	1227
ENSDARG00000008573	ENSDART00000013453	20	6	4	AAACACAGACACCCATGGGGACGCA	7	+	706	1227
ENSDARG00000008573	ENSDART00000013453	20	7	5	AAATGCCCCCTTACGATGCTGGG	5	+	794	1227
ENSDARG00000008573	ENSDART00000013453	20	7	5	AAATGCCCCCTTACGATGCTGGGCC	7	+	794	1227
ENSDARG00000008573	ENSDART00000013453	20	7	5	GCCCCCTTACGATGCTGGGCCGCG	6	+	798	1227
ENSDARG00000008573	ENSDART00000013453	20	7	5	TCCATCTTCGATTATCTTATTGGCA	7	+	844	1227
ENSDARG00000008593	ENSDART00000047834	20	4	4	CAACTCTTCCACCTGGTCTGGTTC	6	+	197	7116
ENSDARG00000008593	ENSDART00000047834	20	8	8	ACCTACAGCGGGCAGCTGAAGAG	5	+	589	7116
ENSDARG00000008593	ENSDART00000047834	20	8	8	CTATGCAGCAGCAGGTCTGATGT	5	+	516	7116
ENSDARG00000008593	ENSDART00000047834	20	8	8	CTATGCAGCAGCAGGTCTGATGTT	6	+	516	7116
ENSDARG00000008593	ENSDART00000047834	20	8	8	ATCACCTACAGCGGGCAGCTGAA	5	+	586	7116
ENSDARG00000008593	ENSDART00000047834	20	8	8	TGCAGCAGCAGGTCTGATGTTTTT	6	+	519	7116
ENSDARG00000008593	ENSDART00000047834	20	10	10	GGCTGCTGCTGGTGGGAGGCTGTG	6	+	722	7116
ENSDARG00000008593	ENSDART00000047834	20	10	10	TCCTCAGGCTGCTGCTGGTGGGAG	6	+	716	7116
ENSDARG00000008593	ENSDART00000047834	20	10	10	GGCTGCTGCTGGTGGGAGGCTGT	5	+	722	7116
ENSDARG00000008593	ENSDART00000047834	20	10	10	AAACAAGTCACTAGTTATGAGGA	5	+	826	7116
ENSDARG00000008593	ENSDART00000047834	20	11	11	AGATGCCCAGCTTTCGACTTTTCT	6	+	884	7116
ENSDARG00000008593	ENSDART00000047834	20	11	11	TTAGTCCCAGAGGCGAGGATTCT	5	+	858	7116
ENSDARG00000008593	ENSDART00000047834	20	14	14	GGCTTCCTCAGTTTGGAGGTTTG	5	+	1297	7116
ENSDARG00000008593	ENSDART00000047834	20	14	14	GGCTTCCTCAGTTTGGAGGTTTGT	6	+	1297	7116
ENSDARG00000008593	ENSDART00000047834	20	14	14	ACATCAGCCCATGATGGGGGCTTC	6	+	1279	7116
ENSDARG00000008593	ENSDART00000047834	20	14	14	CACATCAGCCCATGATGGGGGCTTC	7	+	1278	7116
ENSDARG00000008593	ENSDART00000047834	20	15	15	TGCAAAGGCCCGTTATTTTGGGTA	6	+	1416	7116
ENSDARG00000008593	ENSDART00000047834	20	16	16	GGCTCAAGCGTATGGTCTGGATTC	6	+	1611	7116
ENSDARG00000008593	ENSDART00000047834	20	18	18	AGATTCATCTTGTCAGGTGATTTG	6	+	1852	7116
ENSDARG00000008593	ENSDART00000047834	20	20	20	TGCGGCAGAGCAGCGGTTTGATGGC	7	+	2091	7116
ENSDARG00000008593	ENSDART00000047834	20	20	20	ACCTCATGCGGCAGAGCAGCGGTT	6	+	2085	7116
ENSDARG00000008593	ENSDART00000047834	20	21	21	ACCTTCTGCCTAAGGCTGGGTAA	5	+	2294	7116
ENSDARG00000008593	ENSDART00000047834	20	23	23	AGCCCAAACCAATGGACGACTGT	5	+	2411	7116
ENSDARG00000008593	ENSDART00000047834	20	23	23	TTCATCACACTGCTGACTGAGTG	5	+	2488	7116
ENSDARG00000008593	ENSDART00000047834	20	25	25	CTACACCGCTGTGAGGGGCAGCG	5	+	2791	7116
ENSDARG00000008593	ENSDART00000047834	20	25	25	TTCTACACCGCTGTGAGGGGCAGCG	7	+	2789	7116
ENSDARG00000008593	ENSDART00000047834	20	34	34	GTTCCCTTCAGACACAGGTGCCTTC	7	+	4049	7116
ENSDARG00000008593	ENSDART00000047834	20	36	36	CAACAAAGCTGTACTCTGTGTGGAA	7	+	4175	7116
ENSDARG00000008593	ENSDART00000047834	20	37	37	GTCATCGACTCTCACTGGTGGAGAG	7	+	4309	7116
ENSDARG00000008593	ENSDART00000047834	20	39	39	CACTACAACCCTCAAGAAGACTTT	6	+	4501	7116
ENSDARG00000008593	ENSDART00000047834	20	39	39	ACAACCCTCAAGAAGACTTTGCT	5	+	4505	7116
ENSDARG00000008593	ENSDART00000047834	20	39	39	CTACAACCCTCAAGAAGACTTTGCT	7	+	4503	7116
ENSDARG00000008593	ENSDART00000047834	20	39	39	CCCTCAAGAAGACTTTGCTGAAGTG	7	+	4509	7116
ENSDARG00000008593	ENSDART00000047834	20	41	41	TCCATCAGCCCTGTCTCTGCATTT	6	+	4713	7116
ENSDARG00000008593	ENSDART00000047834	20	42	42	AGACTATTCTGGGCCTGGCTGAGTA	7	+	5027	7116
ENSDARG00000008593	ENSDART00000047834	20	42	42	CACTCAAGCTCAGGTGCTGCAGGG	6	+	4947	7116
ENSDARG00000008593	ENSDART00000047834	20	44	44	TTCTACTTCACTCTTCTGGAGAA	5	+	5302	7116
ENSDARG00000008593	ENSDART00000047834	20	45	45	TCCCCCAGAAGGGAGGTGAAGCT	5	+	5522	7116
ENSDARG00000008593	ENSDART00000047834	20	45	45	ACCGACTGCTGCCTGTGGATTTTGT	7	+	5678	7116
ENSDARG00000008593	ENSDART00000047834	20	45	45	ACCGACTGCTGCCTGTGGATTTT	5	+	5678	7116
ENSDARG00000008593	ENSDART00000047834	20	45	45	GAATCCCCCAGAAGGGAGGTGAA	5	+	5519	7116
ENSDARG00000008593	ENSDART00000047834	20	45	45	GACTGCTGCCTGTGGATTTTGTC	5	+	5681	7116
ENSDARG00000008593	ENSDART00000047834	20	46	46	CCCTCACTCATGTTCAGCAGTCTCT	7	+	5876	7116
ENSDARG00000008593	ENSDART00000047834	20	47	47	AGCAGCTGCTTTCAGTCGCCGTT	5	+	6071	7116
ENSDARG00000008593	ENSDART00000047834	20	48	48	TTCAGCGGCGACAAGGACGTGTTG	6	+	6157	7116
ENSDARG00000008593	ENSDART00000047834	20	49	49	TACGACCCCGAATTGAGGTCTTG	5	+	6323	7116
ENSDARG00000008593	ENSDART00000047834	20	50	50	TCCAGCAGCAAATGGGAGGAGTT	5	+	6511	7116
ENSDARG00000008593	ENSDART00000047834	20	50	50	TCCAGCAGCAAATGGGAGGAGTTT	6	+	6511	7116
ENSDARG00000008593	ENSDART00000047834	20	52	52	GAAAGCAAAGATGAGCATTTGCT	5	+	6802	7116
ENSDARG00000008639	ENSDART00000005609	20	3	3	CCCTCCAGACTTCCTGAGGTGGAA	6	+	256	2286
ENSDARG00000008639	ENSDART00000005609	20	3	3	AGAACCGCAAAAAATCTGCTGGT	5	+	299	2286
ENSDARG00000008639	ENSDART00000005609	20	6	6	ATCATCTACATCTTCTTCTGCTTCT	7	+	592	2286
ENSDARG00000008639	ENSDART00000005609	20	9	9	ACCTGCTTCTGAATCTGTCTGAGGA	7	+	854	2286
ENSDARG00000008639	ENSDART00000005609	20	10	10	GCCTCCGCAGCAAGATGGTGCAGGC	7	+	1130	2286
ENSDARG00000008639	ENSDART00000005609	20	10	10	CTCCGCAGCAAGATGGTGCAGGC	5	+	1132	2286
ENSDARG00000008639	ENSDART00000005609	20	10	10	TTCGCCTGCTCCTCAATCTGTCTTT	7	+	1097	2286
ENSDARG00000008639	ENSDART00000005609	20	10	10	AGCCTCCGCAGCAAGATGGTGCA	5	+	1129	2286
ENSDARG00000008639	ENSDART00000005609	20	11	11	AGAGACAGATTGCCATGCGCATTC	6	+	1199	2286
ENSDARG00000008639	ENSDART00000005609	20	12	12	TTCTGCATCAACCTGGCTGCCAAC	6	+	1345	2286
ENSDARG00000008639	ENSDART00000005609	20	12	12	GAACACCCAGATCATGTGTGAAGGT	7	+	1374	2286
ENSDARG00000008639	ENSDART00000005609	20	13	13	CAAGGCAACGGTCTGAAGATGCT	5	+	1393	2286
ENSDARG00000008639	ENSDART00000005609	20	13	13	TTAAGCTAAAGGATCCTCTGATGAT	7	+	1430	2286
ENSDARG00000008639	ENSDART00000005609	20	16	16	TCCTCAGCCCAGCAAGAAGATGAT	6	+	1795	2286
ENSDARG00000008639	ENSDART00000005609	20	16	16	CTCAGCCCAGCAAGAAGATGATGAG	7	+	1797	2286
ENSDARG00000008639	ENSDART00000005609	20	16	16	AGCCCAGCAAGAAGATGATGAGTTT	7	+	1800	2286
ENSDARG00000008639	ENSDART00000005609	20	16	16	ATCCTCAGCCCAGCAAGAAGATGAT	7	+	1794	2286
ENSDARG00000008639	ENSDART00000102282	20	3	3	CCCTCCAGACTTCCTGAGGTGGAA	6	+	256	2367
ENSDARG00000008639	ENSDART00000102282	20	3	3	AGAACCGCAAAAAATCTGCTGGT	5	+	299	2367
ENSDARG00000008639	ENSDART00000102282	20	6	6	ATCATCTACATCTTCTTCTGCTTCT	7	+	592	2367
ENSDARG00000008639	ENSDART00000102282	20	9	9	ACCTGCTTCTGAATCTGTCTGAGGA	7	+	854	2367
ENSDARG00000008639	ENSDART00000102282	20	10	10	GCCTCCGCAGCAAGATGGTGCAGGC	7	+	1130	2367
ENSDARG00000008639	ENSDART00000102282	20	10	10	CTCCGCAGCAAGATGGTGCAGGC	5	+	1132	2367
ENSDARG00000008639	ENSDART00000102282	20	10	10	TTCGCCTGCTCCTCAATCTGTCTTT	7	+	1097	2367
ENSDARG00000008639	ENSDART00000102282	20	10	10	AGCCTCCGCAGCAAGATGGTGCA	5	+	1129	2367
ENSDARG00000008639	ENSDART00000102282	20	11	11	AGAGACAGATTGCCATGCGCATTC	6	+	1199	2367
ENSDARG00000008639	ENSDART00000102282	20	12	12	TTCTGCATCAACCTGGCTGCCAAC	6	+	1345	2367
ENSDARG00000008639	ENSDART00000102282	20	12	12	GAACACCCAGATCATGTGTGAAGGT	7	+	1374	2367
ENSDARG00000008639	ENSDART00000102282	20	13	13	CAAGGCAACGGTCTGAAGATGCT	5	+	1393	2367
ENSDARG00000008639	ENSDART00000102282	20	13	13	TTAAGCTAAAGGATCCTCTGATGAT	7	+	1430	2367
ENSDARG00000008639	ENSDART00000102282	20	16	16	TCCTCAGCCCAGCAAGAAGATGAT	6	+	1795	2367
ENSDARG00000008639	ENSDART00000102282	20	16	16	AGCCCAGCAAGAAGATGATGAGTTT	7	+	1800	2367
ENSDARG00000008639	ENSDART00000102282	20	16	16	CTCAGCCCAGCAAGAAGATGATGAG	7	+	1797	2367
ENSDARG00000008639	ENSDART00000102282	20	16	16	ATCCTCAGCCCAGCAAGAAGATGAT	7	+	1794	2367
ENSDARG00000008678	ENSDART00000018640	20	1	1	GACGCCAACTGTTTCGGGGTTGGT	6	-	109	486
ENSDARG00000008678	ENSDART00000018640	20	1	1	GACGCCAACTGTTTCGGGGTTGGTA	7	-	108	486
ENSDARG00000008678	ENSDART00000018640	20	1	1	GTACGCGTCATTCAGGTTTTGTG	5	-	53	486
ENSDARG00000008678	ENSDART00000018640	20	2	2	TCCTTCAGCTTGAAGATGGGGAGGT	7	-	176	486
ENSDARG00000008678	ENSDART00000018640	20	2	2	TCCTTCAGCTTGAAGATGGGGAG	5	-	178	486
ENSDARG00000008678	ENSDART00000018640	20	2	2	GACTCCTTCAGCTTGAAGATGGG	5	-	181	486
[truncated: 14,861 more rows]
