# Supplementary material for: Rapid Mutation of Endogenous Zebrafish Genes Using Zinc Finger Nucleases Made by Oligomerized Pool ENgineering (OPEN)
Source: PLoS One. 2009 Feb 9;4(2):e4348. doi: 10.1371/journal.pone.0004348 (PMC2634973; doi:10.1371/journal.pone.0004348)
Supplement: Table S22 — Potential OPEN ZFN target sites in gene transcripts encoded on zebrafish chromosome 22. Data presented as described in the legend to Table S1. (2.11 MB XLS) [file pone.0004348.s022.xls]

## Sheet: Chromosome22
Gene ID	Transcript ID	Chromosome Number	Exon Number	Coding Exon Number	TargetSite	ZFN Spacer Length	Strand	ZFN Cleavage Site	Coding Sequence Length
ENSDARG00000000183	ENSDART00000000192	22	1	1	CACTCCACCTGCGCGTGCTGTCTCT	7	-	77	2799
ENSDARG00000000183	ENSDART00000000192	22	4	4	AACCTCAGATTATGCGGAGACGGC	6	-	300	2799
ENSDARG00000000183	ENSDART00000000192	22	8	8	AGCTCCAGCGTCCGTGCAGCATTC	6	-	633	2799
ENSDARG00000000183	ENSDART00000000192	22	8	8	GTTAAACTCGGACTGAGCTGGTGTG	7	-	603	2799
ENSDARG00000000183	ENSDART00000000192	22	9	9	TCCCTCACCATGGAAAGTGGTTGAC	7	-	757	2799
ENSDARG00000000183	ENSDART00000000192	22	9	9	CCCTCACCATGGAAAGTGGTTGAC	6	-	757	2799
ENSDARG00000000183	ENSDART00000000192	22	15	15	GCCGGCGGCTGTTCATCTGTCGTC	6	-	1383	2799
ENSDARG00000000183	ENSDART00000000192	22	16	16	AACGGCTCCATTCTGTAGTAAAC	5	-	1544	2799
ENSDARG00000000183	ENSDART00000000192	22	18	18	AACCACGTCGTCGTGCGTGTGGTCT	7	-	1761	2799
ENSDARG00000000183	ENSDART00000000192	22	22	22	ACCATCTGCCAGAAGTCTGAGCA	5	-	2239	2799
ENSDARG00000000183	ENSDART00000000192	22	22	22	TTACTCGGCACATCCATCTGAAAAC	7	-	2165	2799
ENSDARG00000000183	ENSDART00000000192	22	23	23	TCCGTCACCTCCAGGTGTGTGAGAG	7	-	2417	2799
ENSDARG00000000183	ENSDART00000000192	22	24	24	TACTGCATCTGACATATCTGCCTTT	7	-	2444	2799
ENSDARG00000000183	ENSDART00000000192	22	24	24	TGCTGCGCACTTGGCTGACGAAGTT	7	-	2518	2799
ENSDARG00000000183	ENSDART00000105792	22	4	4	AACCTCAGATTATGCGGAGACGGC	6	-	195	555
ENSDARG00000000183	ENSDART00000105792	22	8	8	GTTAAACTCGGACTGAGCTGGTGTG	7	-	498	555
ENSDARG00000000183	ENSDART00000105792	22	8	8	AGCTCCAGCGTCCGTGCAGCATTC	6	-	528	555
ENSDARG00000000212	ENSDART00000035315	22	1	1	AAAGCCAACGCGGAGCTGGAGCG	5	+	304	1278
ENSDARG00000000212	ENSDART00000035315	22	1	1	GTTTACGCAGGTGCTGGAGGCAGCG	7	+	118	1278
ENSDARG00000000212	ENSDART00000035315	22	3	3	CTCTGCGTCTGTCAGTGGAGGCC	5	+	515	1278
ENSDARG00000000212	ENSDART00000035315	22	4	4	GCCCGCATCATGGAGGAGATGCG	5	+	733	1278
ENSDARG00000000212	ENSDART00000035315	22	6	6	CTCAAAAGAAATCAGCTCTGGAGGG	7	+	941	1278
ENSDARG00000000212	ENSDART00000035315	22	7	7	GTTCGCACAGTAATCGAAGAGGTG	6	+	1201	1278
ENSDARG00000000212	ENSDART00000105803	22	1	1	CTCCAAAACTATTACGCAGCTGTC	6	+	5	1200
ENSDARG00000000212	ENSDART00000105803	22	3	3	GTTTACGCAGGTGCTGGAGGCAGCG	7	+	130	1200
ENSDARG00000000212	ENSDART00000105803	22	4	4	AAAGCCAACGCGGAGCTGGAGCG	5	+	301	1200
ENSDARG00000000212	ENSDART00000105803	22	6	6	CTCTGCGTCTGTCAGTGGAGGCC	5	+	512	1200
ENSDARG00000000212	ENSDART00000105803	22	7	7	GCCCGCATCATGGAGGAGATGCG	5	+	730	1200
ENSDARG00000000212	ENSDART00000105803	22	9	9	CTCAAAAGAAATCAGCTCTGGAGGG	7	+	935	1200
ENSDARG00000000212	ENSDART00000105803	22	10	10	GCACCCCCCAAGCGTAAGTATTT	5	+	1195	1200
ENSDARG00000000212	ENSDART00000105803	22	10	10	AGCACCCCCCAAGCGTAAGTATTT	6	+	1194	1200
ENSDARG00000000212	ENSDART00000105803	22	10	10	ACAATCAAAGTAGTCGAGGTTGTA	6	+	1171	1200
ENSDARG00000000212	ENSDART00000105806	22	1	1	CTCCAAAACTATTACGCAGCTGTC	6	+	5	1263
ENSDARG00000000212	ENSDART00000105806	22	2	2	AAAGCCAACGCGGAGCTGGAGCG	5	+	364	1263
ENSDARG00000000212	ENSDART00000105806	22	2	2	GTTTACGCAGGTGCTGGAGGCAGCG	7	+	178	1263
ENSDARG00000000212	ENSDART00000105806	22	4	4	CTCTGCGTCTGTCAGTGGAGGCC	5	+	575	1263
ENSDARG00000000212	ENSDART00000105806	22	5	5	GCCCGCATCATGGAGGAGATGCG	5	+	793	1263
ENSDARG00000000212	ENSDART00000105806	22	7	7	CTCAAAAGAAATCAGCTCTGGAGGG	7	+	998	1263
ENSDARG00000000212	ENSDART00000105806	22	8	8	GCACCCCCCAAGCGTAAGTATTT	5	+	1258	1263
ENSDARG00000000212	ENSDART00000105806	22	8	8	AGCACCCCCCAAGCGTAAGTATTT	6	+	1257	1263
ENSDARG00000000212	ENSDART00000105806	22	8	8	ACAATCAAAGTAGTCGAGGTTGTA	6	+	1234	1263
ENSDARG00000000212	ENSDART00000105808	22	2	2	AAAGCCAACGCGGAGCTGGAGCG	5	+	349	1350
ENSDARG00000000212	ENSDART00000105808	22	2	2	GTTTACGCAGGTGCTGGAGGCAGCG	7	+	163	1350
ENSDARG00000000212	ENSDART00000105808	22	4	4	CTCTGCGTCTGTCAGTGGAGGCC	5	+	560	1350
ENSDARG00000000212	ENSDART00000105808	22	5	5	GCCCGCATCATGGAGGAGATGCG	5	+	778	1350
ENSDARG00000000212	ENSDART00000105808	22	7	7	CTCAAAAGAAATCAGCTCTGGAGGG	7	+	983	1350
ENSDARG00000000212	ENSDART00000105808	22	8	8	ACAATCAAAGTAGTCGAGGTTGTA	6	+	1219	1350
ENSDARG00000000212	ENSDART00000105808	22	9	9	GTTCGCACAGTAATCGAAGAGGTG	6	+	1279	1350
ENSDARG00000000212	ENSDART00000105810	22	2	2	GTTTACGCAGGTGCTGGAGGCAGCG	7	+	163	1320
ENSDARG00000000212	ENSDART00000105810	22	2	2	AAAGCCAACGCGGAGCTGGAGCG	5	+	349	1320
ENSDARG00000000212	ENSDART00000105810	22	4	4	CTCTGCGTCTGTCAGTGGAGGCC	5	+	560	1320
ENSDARG00000000212	ENSDART00000105810	22	5	5	GCCCGCATCATGGAGGAGATGCG	5	+	778	1320
ENSDARG00000000212	ENSDART00000105810	22	7	7	CTCAAAAGAAATCAGCTCTGGAGGG	7	+	983	1320
ENSDARG00000000212	ENSDART00000105810	22	8	8	GTTCGCACAGTAATCGAAGAGGTG	6	+	1243	1320
ENSDARG00000000229	ENSDART00000037069	22	1	1	CAACCCGCAGATGTGGCGCTGCG	5	+	66	1947
ENSDARG00000000229	ENSDART00000037069	22	1	1	GAAGTCAAAAAAAGACTGCTAGGAG	7	+	538	1947
ENSDARG00000000229	ENSDART00000037069	22	1	1	TCCTCAACCCGCAGATGTGGCGCT	6	+	62	1947
ENSDARG00000000229	ENSDART00000037069	22	1	1	GTCTTCTGCTTTGCGTGCGGAGAT	6	+	229	1947
ENSDARG00000000229	ENSDART00000037069	22	1	1	ATCCTCAACCCGCAGATGTGGCGCT	7	+	61	1947
ENSDARG00000000229	ENSDART00000037069	22	1	1	TCCATCCTCAACCCGCAGATGTG	5	+	58	1947
ENSDARG00000000229	ENSDART00000037069	22	1	1	ACAATCTGCGCGACGCAGGAAAC	5	+	765	1947
ENSDARG00000000229	ENSDART00000037069	22	1	1	ATCCTCAACCCGCAGATGTGGCG	5	+	61	1947
ENSDARG00000000229	ENSDART00000037069	22	2	2	AGCAACCACCCTCAGGTGGGGGCT	6	+	931	1947
ENSDARG00000000229	ENSDART00000037069	22	2	2	AGCAACCACCCTCAGGTGGGGGC	5	+	931	1947
ENSDARG00000000229	ENSDART00000037069	22	2	2	GCAACCACCCTCAGGTGGGGGCTCT	7	+	932	1947
ENSDARG00000000229	ENSDART00000037069	22	2	2	GCAACCACCCTCAGGTGGGGGCT	5	+	932	1947
ENSDARG00000000229	ENSDART00000037069	22	2	2	GACAGCTGCTCAGCCAGGTGATTGC	7	+	1325	1947
ENSDARG00000000229	ENSDART00000037069	22	2	2	GGCGGCGGCGGCGGCGGCGGTGTC	6	+	967	1947
ENSDARG00000000229	ENSDART00000037069	22	2	2	CTCCTCATCCCGCCAGCAGGTGTC	6	+	1029	1947
ENSDARG00000000229	ENSDART00000037069	22	2	2	CAACCACCCTCAGGTGGGGGCTCT	6	+	933	1947
ENSDARG00000000229	ENSDART00000037069	22	2	2	TCCTCATCCCGCCAGCAGGTGTC	5	+	1030	1947
ENSDARG00000000229	ENSDART00000037069	22	2	2	GCAGTCAGCGGAGCAGAAGGAGCC	6	+	1002	1947
ENSDARG00000000229	ENSDART00000037069	22	3	3	GCCGCCGCCTGCCAGAGGAGCTGCT	7	+	1444	1947
ENSDARG00000000229	ENSDART00000037069	22	3	3	AGAAGCCCAGCGCCGCCGCCTGC	5	+	1433	1947
ENSDARG00000000229	ENSDART00000037069	22	4	4	GCAAGCAGCTGCTGATCTGCAGAT	6	+	1595	1947
ENSDARG00000000229	ENSDART00000037069	22	4	4	AGCAGCTGCTGATCTGCAGATTAC	6	+	1598	1947
ENSDARG00000000229	ENSDART00000037069	22	5	5	TGCAGCTGCTCAGACGCCGCCGCG	6	+	1732	1947
ENSDARG00000000229	ENSDART00000037069	22	5	5	TGCTACAACACTGAAGGAGGTGAG	6	+	1837	1947
ENSDARG00000000229	ENSDART00000037069	22	5	5	TACTGCTACAACACTGAAGGAGGT	6	+	1834	1947
ENSDARG00000000229	ENSDART00000037069	22	5	5	TACTGCAGCTGCTCAGACGCCGCC	6	+	1729	1947
ENSDARG00000000229	ENSDART00000037069	22	5	5	GACGCCGCCGCGAGAGAGGCCTAC	6	+	1744	1947
ENSDARG00000000229	ENSDART00000037069	22	5	5	AGACGCCGCCGCGAGAGAGGCCTAC	7	+	1743	1947
ENSDARG00000000229	ENSDART00000037069	22	5	5	ACATCCAGCCGTACTGCAGCTGCT	6	+	1718	1947
ENSDARG00000000229	ENSDART00000037069	22	5	5	ACATACGACCTGTCTGCGGTCGTG	6	+	1768	1947
ENSDARG00000000568	ENSDART00000032770	22	1	1	ACAGACAGCGCTCTGCGGGCGTT	5	+	100	1899
ENSDARG00000000568	ENSDART00000032770	22	2	2	GACTGCTAAACCACTAATAGGAT	5	+	150	1899
ENSDARG00000000568	ENSDART00000032770	22	5	5	TCCAGCAGCGCTCAGAAGAAGAG	5	+	559	1899
ENSDARG00000000568	ENSDART00000032770	22	5	5	AGAGCCCGCCGCGACCGCTGAGGGA	7	+	578	1899
ENSDARG00000000568	ENSDART00000032770	22	5	5	AGCCTATAACAGGCGTGTCTGATGT	7	+	497	1899
ENSDARG00000000568	ENSDART00000032770	22	7	7	CAATGCCCCGGTGTCTGTGGAGAG	6	+	867	1899
ENSDARG00000000568	ENSDART00000032770	22	8	8	TCCAACGGCAGAGACTGTGAAGGT	6	+	1177	1899
ENSDARG00000000568	ENSDART00000032770	22	8	8	AGAAACGACCTGCAGCCGACTTC	5	+	956	1899
ENSDARG00000000853	ENSDART00000000943	22	1	1	TTCTGCAGCAGCGCAGGTGTTGCT	6	-	136	2571
ENSDARG00000000853	ENSDART00000000943	22	1	1	AGCAGCGCAGGTGTTGCTGTGGTT	6	-	130	2571
ENSDARG00000000853	ENSDART00000000943	22	1	1	GTCAGCTCCCGGGGCTTCTGCGGGT	7	-	17	2571
ENSDARG00000000853	ENSDART00000000943	22	1	1	TGCAGCAGCGCAGGTGTTGCTGTG	6	-	133	2571
ENSDARG00000000853	ENSDART00000000943	22	1	1	TTCTTCTTCAGGAAGCCGCTGTG	5	-	67	2571
ENSDARG00000000853	ENSDART00000000943	22	2	2	GCCTCCGGCCCCAGGGGGAGGAG	5	-	304	2571
ENSDARG00000000853	ENSDART00000000943	22	2	2	GCCTCCGGCCCCAGGGGGAGGAGCC	7	-	302	2571
ENSDARG00000000853	ENSDART00000000943	22	2	2	CGCGTCTGCCGGCCGTGGGTGAAAC	7	-	377	2571
ENSDARG00000000853	ENSDART00000000943	22	2	2	CGCGTCTGCCGGCCGTGGGTGAA	5	-	379	2571
ENSDARG00000000853	ENSDART00000000943	22	2	2	CCCGCCTCCGGCCCCAGGGGGAGGA	7	-	305	2571
ENSDARG00000000853	ENSDART00000000943	22	2	2	AGATACTCCTCATCCTGACGCGGGA	7	-	185	2571
ENSDARG00000000853	ENSDART00000000943	22	2	2	AGCCCCGCCCTCCGCGCCGCAGGC	6	-	334	2571
ENSDARG00000000853	ENSDART00000000943	22	2	2	CCCAGCGCCCGCAGTGGGCCGCC	5	-	447	2571
ENSDARG00000000853	ENSDART00000000943	22	4	4	ACACCCTGCATGCGGCCGGCGCT	5	-	859	2571
ENSDARG00000000853	ENSDART00000000943	22	4	4	TTAGTCACCTGTATGATGAAGAG	5	-	1003	2571
ENSDARG00000000853	ENSDART00000000943	22	4	4	AACGGCAGACTCTCCCGCAGCGTCT	7	-	710	2571
ENSDARG00000000853	ENSDART00000000943	22	4	4	TCCAGCGCCTCCTCCAGCGGCTGCA	7	-	602	2571
ENSDARG00000000853	ENSDART00000000943	22	4	4	GGCCGCCTCCACCTGCTGGTTCT	5	-	944	2571
ENSDARG00000000853	ENSDART00000000943	22	4	4	GGCAGCGGCAGTGTATGGTGTTGAG	7	-	973	2571
ENSDARG00000000853	ENSDART00000000943	22	4	4	TGCAGCGACGCTAGCTGCGTGAAC	6	-	783	2571
ENSDARG00000000853	ENSDART00000000943	22	4	4	GCCACCGTCCGACACGCGGATGAA	6	-	745	2571
ENSDARG00000000853	ENSDART00000000943	22	4	4	GCAGGCGCAGTTCCCCGCGGAGGCG	7	-	816	2571
ENSDARG00000000853	ENSDART00000000943	22	4	4	GCCTCCACCTGCTGGTTCTGCAGCA	7	-	938	2571
ENSDARG00000000853	ENSDART00000000943	22	5	5	ATCTCCTCCTGCTTGCGGTTGGC	5	-	1114	2571
ENSDARG00000000853	ENSDART00000000943	22	5	5	TCCTCCTGCTTGCGGTTGGCGAT	5	-	1111	2571
ENSDARG00000000853	ENSDART00000000943	22	6	6	GTTGGCCACCGCCTGATTGAGTC	5	-	1301	2571
ENSDARG00000000853	ENSDART00000000943	22	6	6	CTCACCGGCTCGCCGTTAGACGAC	6	-	1224	2571
ENSDARG00000000853	ENSDART00000000943	22	7	7	GAAGGCCTCGTGTGAGCTGTTGAG	6	-	1588	2571
ENSDARG00000000853	ENSDART00000000943	22	11	11	TTCTTCAGCTTGATGTCGCGGTG	5	-	2134	2571
ENSDARG00000000853	ENSDART00000000943	22	11	11	ACATCCAGAGCGATCAGAAGACGCT	7	-	2069	2571
ENSDARG00000000853	ENSDART00000000943	22	13	13	GAAGGCTTCTGGGAGTTTGACGGA	6	-	2344	2571
ENSDARG00000000853	ENSDART00000000943	22	13	13	CGCTTCACCTTTCTTGACGTTGGT	6	-	2398	2571
ENSDARG00000000853	ENSDART00000000943	22	14	14	CTCATCAAAGACCGGCAGACGCT	5	-	2426	2571
ENSDARG00000000853	ENSDART00000000943	22	14	14	GCACGCCTCCATCAGCTGCCAAC	5	-	2453	2571
ENSDARG00000000853	ENSDART00000067637	22	1	1	GTCAGCTCCCGGGGCTTCTGCGGGT	7	-	17	2655
ENSDARG00000000853	ENSDART00000067637	22	1	1	AGCAGCGCAGGTGTTGCTGTGGTT	6	-	130	2655
ENSDARG00000000853	ENSDART00000067637	22	1	1	TGCAGCAGCGCAGGTGTTGCTGTG	6	-	133	2655
ENSDARG00000000853	ENSDART00000067637	22	1	1	TTCTGCAGCAGCGCAGGTGTTGCT	6	-	136	2655
ENSDARG00000000853	ENSDART00000067637	22	1	1	TTCTTCTTCAGGAAGCCGCTGTG	5	-	67	2655
ENSDARG00000000853	ENSDART00000067637	22	2	2	CGCGTCTGCCGGCCGTGGGTGAA	5	-	379	2655
ENSDARG00000000853	ENSDART00000067637	22	2	2	GCCTCCGGCCCCAGGGGGAGGAG	5	-	304	2655
ENSDARG00000000853	ENSDART00000067637	22	2	2	CGCGTCTGCCGGCCGTGGGTGAAAC	7	-	377	2655
ENSDARG00000000853	ENSDART00000067637	22	2	2	CCCGCCTCCGGCCCCAGGGGGAGGA	7	-	305	2655
ENSDARG00000000853	ENSDART00000067637	22	2	2	CCCAGCGCCCGCAGTGGGCCGCC	5	-	447	2655
ENSDARG00000000853	ENSDART00000067637	22	2	2	AGCCCCGCCCTCCGCGCCGCAGGC	6	-	334	2655
ENSDARG00000000853	ENSDART00000067637	22	2	2	AGATACTCCTCATCCTGACGCGGGA	7	-	185	2655
ENSDARG00000000853	ENSDART00000067637	22	2	2	ACCTGCAGCAGTGTATGATGGAGCG	7	-	545	2655
ENSDARG00000000853	ENSDART00000067637	22	2	2	GCCTCCGGCCCCAGGGGGAGGAGCC	7	-	302	2655
ENSDARG00000000853	ENSDART00000067637	22	3	3	GCCACCGTCCGACACGCGGATGAA	6	-	745	2655
ENSDARG00000000853	ENSDART00000067637	22	3	3	GCCTCCACCTGCTGGTTCTGCAGCA	7	-	938	2655
ENSDARG00000000853	ENSDART00000067637	22	3	3	GGCAGCGGCAGTGTATGGTGTTGAG	7	-	973	2655
ENSDARG00000000853	ENSDART00000067637	22	3	3	GGCCGCCTCCACCTGCTGGTTCT	5	-	944	2655
ENSDARG00000000853	ENSDART00000067637	22	3	3	TTAGTCACCTGTATGATGAAGAG	5	-	1003	2655
ENSDARG00000000853	ENSDART00000067637	22	3	3	GCAGGCGCAGTTCCCCGCGGAGGCG	7	-	816	2655
ENSDARG00000000853	ENSDART00000067637	22	3	3	TGCAGCGACGCTAGCTGCGTGAAC	6	-	783	2655
ENSDARG00000000853	ENSDART00000067637	22	3	3	TCCAGCGCCTCCTCCAGCGGCTGCA	7	-	602	2655
ENSDARG00000000853	ENSDART00000067637	22	3	3	ACACCCTGCATGCGGCCGGCGCT	5	-	859	2655
ENSDARG00000000853	ENSDART00000067637	22	3	3	AACGGCAGACTCTCCCGCAGCGTCT	7	-	710	2655
ENSDARG00000000853	ENSDART00000067637	22	4	4	ATCTCCTCCTGCTTGCGGTTGGC	5	-	1114	2655
ENSDARG00000000853	ENSDART00000067637	22	4	4	TCCTCCTGCTTGCGGTTGGCGAT	5	-	1111	2655
ENSDARG00000000853	ENSDART00000067637	22	5	5	CTCACCGGCTCGCCGTTAGACGAC	6	-	1224	2655
ENSDARG00000000853	ENSDART00000067637	22	5	5	GTTGGCCACCGCCTGATTGAGTC	5	-	1301	2655
ENSDARG00000000853	ENSDART00000067637	22	6	6	GACCTCCACGTGATACGCCGCATTC	7	-	1458	2655
ENSDARG00000000853	ENSDART00000067637	22	7	7	GAAGGCCTCGTGTGAGCTGTTGAG	6	-	1672	2655
ENSDARG00000000853	ENSDART00000067637	22	8	8	ACACACACCGTGCAGCAGAATGT	5	-	1829	2655
ENSDARG00000000853	ENSDART00000067637	22	11	11	TTCTTCAGCTTGATGTCGCGGTG	5	-	2218	2655
ENSDARG00000000853	ENSDART00000067637	22	11	11	ACATCCAGAGCGATCAGAAGACGCT	7	-	2153	2655
ENSDARG00000000853	ENSDART00000067637	22	13	13	CGCTTCACCTTTCTTGACGTTGGT	6	-	2482	2655
ENSDARG00000000853	ENSDART00000067637	22	13	13	GAAGGCTTCTGGGAGTTTGACGGA	6	-	2428	2655
ENSDARG00000000853	ENSDART00000067637	22	14	14	GCACGCCTCCATCAGCTGCCAAC	5	-	2537	2655
ENSDARG00000000853	ENSDART00000067637	22	14	14	CTCATCAAAGACCGGCAGACGCT	5	-	2510	2655
ENSDARG00000000853	ENSDART00000106645	22	1	1	TTCTTCTTCAGGAAGCCGCTGTG	5	-	67	2655
ENSDARG00000000853	ENSDART00000106645	22	1	1	TTCTGCAGCAGCGCAGGTGTTGCT	6	-	136	2655
ENSDARG00000000853	ENSDART00000106645	22	1	1	TGCAGCAGCGCAGGTGTTGCTGTG	6	-	133	2655
ENSDARG00000000853	ENSDART00000106645	22	1	1	GTCAGCTCCCGGGGCTTCTGCGGGT	7	-	17	2655
ENSDARG00000000853	ENSDART00000106645	22	1	1	AGCAGCGCAGGTGTTGCTGTGGTT	6	-	130	2655
ENSDARG00000000853	ENSDART00000106645	22	2	2	AGCCCCGCCCTCCGCGCCGCAGGC	6	-	334	2655
ENSDARG00000000853	ENSDART00000106645	22	2	2	AGATACTCCTCATCCTGACGCGGGA	7	-	185	2655
ENSDARG00000000853	ENSDART00000106645	22	2	2	CCCAGCGCCCGCAGTGGGCCGCC	5	-	447	2655
ENSDARG00000000853	ENSDART00000106645	22	2	2	CCCGCCTCCGGCCCCAGGGGGAGGA	7	-	305	2655
ENSDARG00000000853	ENSDART00000106645	22	2	2	CGCGTCTGCCGGCCGTGGGTGAA	5	-	379	2655
ENSDARG00000000853	ENSDART00000106645	22	2	2	CGCGTCTGCCGGCCGTGGGTGAAAC	7	-	377	2655
ENSDARG00000000853	ENSDART00000106645	22	2	2	GCCTCCGGCCCCAGGGGGAGGAGCC	7	-	302	2655
ENSDARG00000000853	ENSDART00000106645	22	2	2	GCCTCCGGCCCCAGGGGGAGGAG	5	-	304	2655
ENSDARG00000000853	ENSDART00000106645	22	4	4	GCCACCGTCCGACACGCGGATGAA	6	-	745	2655
ENSDARG00000000853	ENSDART00000106645	22	4	4	GCCTCCACCTGCTGGTTCTGCAGCA	7	-	938	2655
ENSDARG00000000853	ENSDART00000106645	22	4	4	GGCCGCCTCCACCTGCTGGTTCT	5	-	944	2655
ENSDARG00000000853	ENSDART00000106645	22	4	4	GCAGGCGCAGTTCCCCGCGGAGGCG	7	-	816	2655
ENSDARG00000000853	ENSDART00000106645	22	4	4	TGCAGCGACGCTAGCTGCGTGAAC	6	-	783	2655
ENSDARG00000000853	ENSDART00000106645	22	4	4	TCCAGCGCCTCCTCCAGCGGCTGCA	7	-	602	2655
ENSDARG00000000853	ENSDART00000106645	22	4	4	TTAGTCACCTGTATGATGAAGAG	5	-	1003	2655
ENSDARG00000000853	ENSDART00000106645	22	4	4	GGCAGCGGCAGTGTATGGTGTTGAG	7	-	973	2655
ENSDARG00000000853	ENSDART00000106645	22	4	4	ACACCCTGCATGCGGCCGGCGCT	5	-	859	2655
ENSDARG00000000853	ENSDART00000106645	22	4	4	AACGGCAGACTCTCCCGCAGCGTCT	7	-	710	2655
ENSDARG00000000853	ENSDART00000106645	22	5	5	ATCTCCTCCTGCTTGCGGTTGGC	5	-	1114	2655
ENSDARG00000000853	ENSDART00000106645	22	5	5	TCCTCCTGCTTGCGGTTGGCGAT	5	-	1111	2655
ENSDARG00000000853	ENSDART00000106645	22	6	6	CTCACCGGCTCGCCGTTAGACGAC	6	-	1224	2655
ENSDARG00000000853	ENSDART00000106645	22	6	6	GTTGGCCACCGCCTGATTGAGTC	5	-	1301	2655
ENSDARG00000000853	ENSDART00000106645	22	7	7	GACCTCCACGTGATACGCCGCATTC	7	-	1458	2655
ENSDARG00000000853	ENSDART00000106645	22	8	8	GAAGGCCTCGTGTGAGCTGTTGAG	6	-	1672	2655
ENSDARG00000000853	ENSDART00000106645	22	12	12	TTCTTCAGCTTGATGTCGCGGTG	5	-	2218	2655
ENSDARG00000000853	ENSDART00000106645	22	12	12	ACATCCAGAGCGATCAGAAGACGCT	7	-	2153	2655
ENSDARG00000000853	ENSDART00000106645	22	14	14	GAAGGCTTCTGGGAGTTTGACGGA	6	-	2428	2655
ENSDARG00000000853	ENSDART00000106645	22	14	14	CGCTTCACCTTTCTTGACGTTGGT	6	-	2482	2655
ENSDARG00000000853	ENSDART00000106645	22	15	15	GCACGCCTCCATCAGCTGCCAAC	5	-	2537	2655
ENSDARG00000000853	ENSDART00000106645	22	15	15	CTCATCAAAGACCGGCAGACGCT	5	-	2510	2655
ENSDARG00000001057	ENSDART00000001201	22	1	1	CGCGGCCGCGCTGCTTCTGCCGGC	6	-	224	1395
ENSDARG00000001057	ENSDART00000001201	22	1	1	CGCTGCTTCTGCCGGCCGCTGCA	5	-	217	1395
ENSDARG00000001057	ENSDART00000001201	22	1	1	GCATTCACCCAGTCTGGTCGCCGGT	7	-	360	1395
ENSDARG00000001057	ENSDART00000001201	22	1	1	TCCTGCAGCTCCTCCTGCTGTCTGC	7	-	311	1395
ENSDARG00000001057	ENSDART00000001201	22	1	1	TGCTTCTGCCGGCCGCTGCAGCG	5	-	214	1395
ENSDARG00000001057	ENSDART00000001201	22	1	1	TTCACCTTCGGCATGATGACGGT	5	-	130	1395
ENSDARG00000001057	ENSDART00000001201	22	1	1	TGCTCCTCCTGCCCGCGGCCGCG	5	-	238	1395
ENSDARG00000001057	ENSDART00000001201	22	1	1	CACCCAGTCTGGTCGCCGGTGTC	5	-	357	1395
ENSDARG00000001057	ENSDART00000001201	22	1	1	AGCTGCACACACGTGGGTCTGAGAG	7	-	23	1395
ENSDARG00000001057	ENSDART00000001201	22	1	1	AGCTCCTCCTGCTGTCTGCGGGC	5	-	307	1395
ENSDARG00000001057	ENSDART00000001201	22	2	2	ACACTCACCGCATCGGCGGGTTT	5	-	504	1395
ENSDARG00000001057	ENSDART00000001201	22	2	2	ACACTCACCGCATCGGCGGGTTTT	6	-	503	1395
ENSDARG00000001057	ENSDART00000001201	22	2	2	CTCACCGCATCGGCGGGTTTTTG	5	-	501	1395
ENSDARG00000001057	ENSDART00000001201	22	2	2	CTCACCGCATCGGCGGGTTTTTGC	6	-	500	1395
ENSDARG00000001057	ENSDART00000001201	22	2	2	CTCACCGCATCGGCGGGTTTTTGCT	7	-	499	1395
ENSDARG00000001057	ENSDART00000001201	22	2	2	CACCGCATCGGCGGGTTTTTGCT	5	-	499	1395
ENSDARG00000001057	ENSDART00000001201	22	3	3	ACCGTCCCCACCTCCGTCTGCTTCT	7	-	557	1395
ENSDARG00000001057	ENSDART00000001201	22	5	5	AGCAGCACCAGATTGTAGAAGCG	5	-	829	1395
ENSDARG00000001057	ENSDART00000001201	22	7	7	ACCAGCGTCAGCAGGCTCTGATGCC	7	-	1220	1395
ENSDARG00000001057	ENSDART00000001201	22	7	7	CGCTGCACCAGCGTCAGCAGGCTCT	7	-	1226	1395
ENSDARG00000001734	ENSDART00000002029	22	2	1	TGCAAAAGAAGACAAATCTGCAGAA	7	+	213	1227
ENSDARG00000001734	ENSDART00000002029	22	2	1	GTTGGCTAAGAAATCTGCTGGCGCT	7	+	63	1227
ENSDARG00000001734	ENSDART00000002029	22	2	1	ATCTGCAGAAAGTCCTTCTGCAGAA	7	+	228	1227
ENSDARG00000001734	ENSDART00000002029	22	2	1	AGAACCAGAAGAGTGGCTGGATGT	6	+	249	1227
ENSDARG00000001734	ENSDART00000002029	22	3	2	GAACACACAGGAAATGGGCAGCT	5	+	277	1227
ENSDARG00000001734	ENSDART00000002029	22	5	4	CGCGCCGACTATGCCTTTGCTGTC	6	+	697	1227
ENSDARG00000001734	ENSDART00000002029	22	6	5	TCCTGCGTCTCTGTTCTGGCGCA	5	+	877	1227
ENSDARG00000001734	ENSDART00000002029	22	6	5	TTCCGCAAAGGCAAGGTTAGTTT	5	+	925	1227
ENSDARG00000001734	ENSDART00000002029	22	7	6	TTAAAACACTGAAAATGGCTTTGAA	7	+	974	1227
ENSDARG00000001734	ENSDART00000002029	22	8	7	AGACTATCCACGCTGAGCTGTCGAA	7	+	1016	1227
ENSDARG00000001734	ENSDART00000002029	22	8	7	TGCCAAGTCCTCATGGGTGAGAG	5	+	1137	1227
ENSDARG00000001818	ENSDART00000035482	22	2	2	TCCTGCAAACCCTAGAGGTGAATTT	7	+	251	4890
ENSDARG00000001818	ENSDART00000035482	22	2	2	GTAAAAGTCACTGTTGTGGTTTAC	6	+	157	4890
ENSDARG00000001818	ENSDART00000035482	22	2	2	CAAAACAGAACATCCTGGTGGAGGG	7	+	113	4890
ENSDARG00000001818	ENSDART00000035482	22	5	5	GAATCCAGATGGAATTGCGGTGCA	6	+	501	4890
ENSDARG00000001818	ENSDART00000035482	22	6	6	GTTTTCAGCAGAGAGTTTGAAGTG	6	+	643	4890
ENSDARG00000001818	ENSDART00000035482	22	7	7	AACATCCCACCTCAGTCTGGATGC	6	+	711	4890
ENSDARG00000001818	ENSDART00000035482	22	7	7	TCCCACCTCAGTCTGGATGCAGAA	6	+	715	4890
ENSDARG00000001818	ENSDART00000035482	22	7	7	ACATCCCACCTCAGTCTGGATGC	5	+	712	4890
ENSDARG00000001818	ENSDART00000035482	22	9	9	CAAAGCATCAGTATTGACTAGTTC	6	+	981	4890
ENSDARG00000001818	ENSDART00000035482	22	18	18	TACATCACCGAGGACTGGAGCTGTG	7	+	2146	4890
ENSDARG00000001818	ENSDART00000035482	22	18	18	TCCTGCAGAGGTGTTGTGTGGAC	5	+	2075	4890
ENSDARG00000001818	ENSDART00000035482	22	19	19	AGAGGCGGCTTCAGTGTTTGAGGAA	7	+	2229	4890
ENSDARG00000001818	ENSDART00000035482	22	19	19	GGCGGCTTCAGTGTTTGAGGAAGAT	7	+	2232	4890
ENSDARG00000001818	ENSDART00000035482	22	19	19	AGAGGCGGCTTCAGTGTTTGAGGA	6	+	2229	4890
ENSDARG00000001818	ENSDART00000035482	22	21	21	AACGTCCGCGTGTGGAAGCCGTT	5	+	2455	4890
ENSDARG00000001818	ENSDART00000035482	22	21	21	TTCTTCATCGACCTGCGTTTGCC	5	+	2476	4890
ENSDARG00000001818	ENSDART00000035482	22	23	23	GAAGACAGAGGACATGTGTAGTGT	6	+	2592	4890
ENSDARG00000001818	ENSDART00000035482	22	23	23	GAAGACAGAGGACATGTGTAGTG	5	+	2592	4890
ENSDARG00000001818	ENSDART00000035482	22	24	24	CCCATCAGAGAAAGGAGGCAGTG	5	+	2829	4890
ENSDARG00000001818	ENSDART00000035482	22	24	24	AGACACTTAAAGTGAGGAGCTTTG	6	+	2798	4890
ENSDARG00000001818	ENSDART00000035482	22	26	26	AGAAGCTGCAGTTGGATGCTGTT	5	+	2867	4890
ENSDARG00000001818	ENSDART00000035482	22	27	27	GAATCAGTCGCAGAGAAGAGGCC	5	+	3092	4890
ENSDARG00000001818	ENSDART00000035482	22	30	30	CAAAGCATCTTTGACAGCATTTGTA	7	+	3393	4890
ENSDARG00000001818	ENSDART00000035482	22	34	34	TCCGTCAGACCTCAATTTGTTGGT	6	+	3855	4890
ENSDARG00000001818	ENSDART00000035482	22	36	36	ATCAGCTTCCTGATGTGTATGAGAA	7	+	4034	4890
ENSDARG00000001818	ENSDART00000035482	22	39	39	ATCAACAACTTCCAAGTGGTGGAC	6	+	4276	4890
ENSDARG00000001818	ENSDART00000035482	22	39	39	AACAACTTCCAAGTGGTGGACAAC	6	+	4279	4890
ENSDARG00000001818	ENSDART00000061030	22	2	2	CAAAACAGAACATCCTGGTGGAGGG	7	+	113	4902
ENSDARG00000001818	ENSDART00000061030	22	2	2	TCCTGCAAACCCTAGAGGTGAATTT	7	+	251	4902
ENSDARG00000001818	ENSDART00000061030	22	2	2	GTAAAAGTCACTGTTGTGGTTTAC	6	+	157	4902
ENSDARG00000001818	ENSDART00000061030	22	5	5	GAATCCAGATGGAATTGCGGTGCA	6	+	501	4902
ENSDARG00000001818	ENSDART00000061030	22	6	6	GTTTTCAGCAGAGAGTTTGAAGTG	6	+	643	4902
ENSDARG00000001818	ENSDART00000061030	22	7	7	ACATCCCACCTCAGTCTGGATGC	5	+	712	4902
ENSDARG00000001818	ENSDART00000061030	22	7	7	TCCCACCTCAGTCTGGATGCAGAA	6	+	715	4902
ENSDARG00000001818	ENSDART00000061030	22	7	7	AACATCCCACCTCAGTCTGGATGC	6	+	711	4902
ENSDARG00000001818	ENSDART00000061030	22	10	10	CAAAGCATCAGTATTGACTAGTTC	6	+	984	4902
ENSDARG00000001818	ENSDART00000061030	22	19	19	TACATCACCGAGGACTGGAGCTGTG	7	+	2149	4902
ENSDARG00000001818	ENSDART00000061030	22	19	19	TCCTGCAGAGGTGTTGTGTGGAC	5	+	2078	4902
ENSDARG00000001818	ENSDART00000061030	22	21	21	GGCGGCTTCAGTGTTTGAGGAAGAT	7	+	2274	4902
ENSDARG00000001818	ENSDART00000061030	22	21	21	AGAGGCGGCTTCAGTGTTTGAGGAA	7	+	2271	4902
ENSDARG00000001818	ENSDART00000061030	22	21	21	AGAGGCGGCTTCAGTGTTTGAGGA	6	+	2271	4902
ENSDARG00000001818	ENSDART00000061030	22	23	23	TTCTTCATCGACCTGCGTTTGCC	5	+	2518	4902
ENSDARG00000001818	ENSDART00000061030	22	23	23	AACGTCCGCGTGTGGAAGCCGTT	5	+	2497	4902
ENSDARG00000001818	ENSDART00000061030	22	25	25	GAAGACAGAGGACATGTGTAGTG	5	+	2634	4902
ENSDARG00000001818	ENSDART00000061030	22	25	25	GAAGACAGAGGACATGTGTAGTGT	6	+	2634	4902
ENSDARG00000001818	ENSDART00000061030	22	26	26	CCCATCAGAGAAAGGAGGCAGTG	5	+	2871	4902
ENSDARG00000001818	ENSDART00000061030	22	26	26	AGACACTTAAAGTGAGGAGCTTTG	6	+	2840	4902
ENSDARG00000001818	ENSDART00000061030	22	27	27	AGAAGCTGCAGTTGGATGCTGTT	5	+	2897	4902
ENSDARG00000001818	ENSDART00000061030	22	28	28	GAATCAGTCGCAGAGAAGAGGCC	5	+	3122	4902
ENSDARG00000001818	ENSDART00000061030	22	31	31	CAAAGCATCTTTGACAGCATTTGTA	7	+	3423	4902
ENSDARG00000001818	ENSDART00000061030	22	35	35	TCCGTCAGACCTCAATTTGTTGGT	6	+	3867	4902
ENSDARG00000001818	ENSDART00000061030	22	37	37	ATCAGCTTCCTGATGTGTATGAGAA	7	+	4046	4902
ENSDARG00000001818	ENSDART00000061030	22	40	40	ATCAACAACTTCCAAGTGGTGGAC	6	+	4288	4902
ENSDARG00000001818	ENSDART00000061030	22	40	40	AACAACTTCCAAGTGGTGGACAAC	6	+	4291	4902
ENSDARG00000002002	ENSDART00000104400	22	7	7	TCCAACTAATTAAACCGTGGGAGCA	7	+	569	1065
ENSDARG00000002002	ENSDART00000104400	22	9	9	CCCGCCTGCTTTGTGTGCGGTGAG	6	+	772	1065
ENSDARG00000002002	ENSDART00000104402	22	10	10	CCCGCCTGCTTTGTGTGCGGTGAG	6	+	814	1107
ENSDARG00000002002	ENSDART00000104404	22	4	4	TTCTGCAGAGTCTTCAGGAGTTGTT	7	+	389	1119
ENSDARG00000002002	ENSDART00000104404	22	11	11	CCCGCCTGCTTTGTGTGCGGTGAG	6	+	826	1119
ENSDARG00000002192	ENSDART00000064798	22	2	1	ATCAAAATCACCCGCGTCTTGTTG	6	-	109	1110
ENSDARG00000002192	ENSDART00000064798	22	2	1	ACCCGCGTCTTGTTGCATGATGT	5	-	101	1110
ENSDARG00000002192	ENSDART00000064798	22	4	3	GAAGTCTGCTGATCTTGTTGTCGTG	7	-	514	1110
ENSDARG00000002192	ENSDART00000064798	22	4	3	AAACGCTCCTTTTGGAAGTCTGC	5	-	530	1110
ENSDARG00000002192	ENSDART00000064798	22	5	4	CAATCCCACTGTTTGTAATTGGAT	6	-	593	1110
ENSDARG00000002192	ENSDART00000064798	22	8	7	AAACGCAGCGGAAGGTGGGTGGCT	6	-	1058	1110
ENSDARG00000002192	ENSDART00000064798	22	8	7	AAACGCAGCGGAAGGTGGGTGGC	5	-	1059	1110
ENSDARG00000002192	ENSDART00000105859	22	1	1	ACCCGCGTCTTGTTGCATGATGT	5	-	101	1059
ENSDARG00000002192	ENSDART00000105859	22	4	4	GAAGTCTGCTGATCTTGTTGTCGTG	7	-	463	1059
ENSDARG00000002192	ENSDART00000105859	22	4	4	AAACGCTCCTTTTGGAAGTCTGC	5	-	479	1059
ENSDARG00000002192	ENSDART00000105859	22	5	5	CAATCCCACTGTTTGTAATTGGAT	6	-	542	1059
ENSDARG00000002192	ENSDART00000105859	22	8	8	AAACGCAGCGGAAGGTGGGTGGCT	6	-	1007	1059
ENSDARG00000002192	ENSDART00000105859	22	8	8	AAACGCAGCGGAAGGTGGGTGGC	5	-	1008	1059
ENSDARG00000002215	ENSDART00000021666	22	2	2	TACCTCAGACCCGGTGTGCTTCT	5	-	136	1095
ENSDARG00000002215	ENSDART00000021666	22	3	3	GGCTCCCTCCAGATTGCCGTTGCA	6	-	196	1095
ENSDARG00000002215	ENSDART00000021666	22	3	3	AGCTCCAGACCTGACAGATGCTGAG	7	-	158	1095
ENSDARG00000002215	ENSDART00000021666	22	8	8	GCCTGCAAATATGCAGCCGGTGGA	6	-	769	1095
ENSDARG00000002215	ENSDART00000021666	22	9	9	TTCCTAAGCAACATTTCTGCTGCC	6	-	840	1095
ENSDARG00000002215	ENSDART00000021666	22	10	10	TTCGGCGACGTGGATTGCCGTTTGC	7	-	975	1095
ENSDARG00000002293	ENSDART00000020087	22	4	4	TTATGCGACCCATAAAGATGGAGTT	7	-	652	1308
ENSDARG00000002293	ENSDART00000020087	22	6	6	AGAGACGCAGGTCTGGAGGACTTT	6	-	912	1308
ENSDARG00000002293	ENSDART00000020087	22	6	6	TTCTCAGACATGAGGGAGATTTT	5	-	979	1308
ENSDARG00000002293	ENSDART00000020087	22	7	7	CTCACCTTCGTCTTGATGTAGGA	5	-	1132	1308
ENSDARG00000002293	ENSDART00000105455	22	4	4	TTATGCGACCCATAAAGATGGAGTT	7	-	781	1437
ENSDARG00000002293	ENSDART00000105455	22	6	6	AGAGACGCAGGTCTGGAGGACTTT	6	-	1041	1437
ENSDARG00000002293	ENSDART00000105455	22	6	6	TTCTCAGACATGAGGGAGATTTT	5	-	1108	1437
ENSDARG00000002293	ENSDART00000105455	22	7	7	CTCACCTTCGTCTTGATGTAGGA	5	-	1261	1437
ENSDARG00000002365	ENSDART00000011076	22	1	1	CTCCACCCCGGGCGCTGGGTCGGC	6	-	82	1161
ENSDARG00000002365	ENSDART00000011076	22	2	2	GAATCATACCTTTGTGATGGATGT	6	-	274	1161
ENSDARG00000002365	ENSDART00000011076	22	2	2	CTCAACTCCGTCTGGATCTGAAGCA	7	-	209	1161
ENSDARG00000002365	ENSDART00000011076	22	3	3	CACATCCCAGTCCAGCTGTTTAG	5	-	320	1161
ENSDARG00000002365	ENSDART00000011076	22	5	5	GTATCCCACATCCACGGAGACTAC	6	-	474	1161
ENSDARG00000002365	ENSDART00000011076	22	7	7	ACCTCCAGCAGGAAGTCGGAGGC	5	-	730	1161
ENSDARG00000002365	ENSDART00000011076	22	9	9	AGATACGACCAGAAGATGTGTAG	5	-	952	1161
ENSDARG00000002365	ENSDART00000011076	22	9	9	ACCAGCAGCAAGAAGTTGAAGAG	5	-	919	1161
ENSDARG00000002365	ENSDART00000011076	22	9	9	AGAACCAGCAGCAAGAAGTTGAA	5	-	922	1161
ENSDARG00000002365	ENSDART00000011076	22	9	9	AGATACGACCAGAAGATGTGTAGCA	7	-	950	1161
ENSDARG00000002365	ENSDART00000011076	22	10	10	GTTTTCTCCTCGCGGCGAGGCAGAT	7	-	1092	1161
ENSDARG00000002710	ENSDART00000017188	22	2	2	GGCGGCGCATCTTTTTTAGCTGCC	6	-	27	2115
ENSDARG00000002710	ENSDART00000017188	22	2	2	CTCTTCCACTTCTTTAGGAGGTGGA	7	-	66	2115
ENSDARG00000002710	ENSDART00000017188	22	2	2	TTCCACTTCTTTAGGAGGTGGAG	5	-	65	2115
ENSDARG00000002710	ENSDART00000017188	22	2	2	TTCCACTTCTTTAGGAGGTGGAGGT	7	-	63	2115
ENSDARG00000002710	ENSDART00000017188	22	2	2	TTCCTCTTCCACTTCTTTAGGAGGT	7	-	69	2115
ENSDARG00000002710	ENSDART00000017188	22	3	3	CGCTACAGCTTTGACTGGTGGTGCC	7	-	132	2115
ENSDARG00000002710	ENSDART00000017188	22	3	3	GCCTTCACAGGAGCCGCGTTTTTC	6	-	159	2115
ENSDARG00000002710	ENSDART00000017188	22	3	3	TTCATCCTCACTCTCCTGTTTGGCA	7	-	204	2115
ENSDARG00000002710	ENSDART00000017188	22	5	5	TCCTCAGACTCCTCAGCAGGAGCT	6	-	477	2115
ENSDARG00000002710	ENSDART00000017188	22	5	5	ATCCTCAGACTCCTCAGCAGGAGCT	7	-	477	2115
ENSDARG00000002710	ENSDART00000017188	22	5	5	AGACTCCTCAGCAGGAGCTGCTTTC	7	-	471	2115
ENSDARG00000002710	ENSDART00000017188	22	6	6	TGCTGCAGCTTTTTTAGGAGGCGGA	7	-	540	2115
ENSDARG00000002710	ENSDART00000017188	22	6	6	CGCTGCTGCAGCTTTTTTAGGAG	5	-	545	2115
ENSDARG00000002710	ENSDART00000017188	22	6	6	CGCTGCTGCAGCTTTTTTAGGAGGC	7	-	543	2115
ENSDARG00000002710	ENSDART00000017188	22	6	6	CTCTTCATCTGACTCCTCTTTGGCT	7	-	594	2115
ENSDARG00000002710	ENSDART00000017188	22	8	8	TTCCTCTTAGCTGGAGTGGCCGGG	6	-	780	2115
ENSDARG00000002710	ENSDART00000017188	22	8	8	ACCCTCGCCATCGGTTTTAGCCTTC	7	-	843	2115
ENSDARG00000002710	ENSDART00000017188	22	8	8	TTAGCCTTCTTAGCCGGCGGCGTTC	7	-	827	2115
ENSDARG00000002710	ENSDART00000017188	22	8	8	TTAGCCTTCTTAGCCGGCGGCGTT	6	-	828	2115
ENSDARG00000002710	ENSDART00000017188	22	10	10	TTCTGCAACTCTTCCTCTGAGGCG	6	-	1011	2115
ENSDARG00000002710	ENSDART00000017188	22	10	10	CTCTTCCTCTGAGGCGAAGTCAAC	6	-	1003	2115
ENSDARG00000002710	ENSDART00000017188	22	10	10	CAACTCTTCCTCTGAGGCGAAGTC	6	-	1006	2115
ENSDARG00000002710	ENSDART00000017188	22	11	11	ACCCTCTGCTAGTGCCGGTGTTGCC	7	-	1231	2115
ENSDARG00000002710	ENSDART00000017188	22	12	12	CACCTCTGCCGCCCTGCCGACTCT	6	-	1364	2115
ENSDARG00000002710	ENSDART00000017188	22	14	14	TCCGCCGCCTCTTTCTCTGTCGTT	6	-	1621	2115
ENSDARG00000002710	ENSDART00000017188	22	14	14	CTCCACAAACGCATATCTGGAGAA	6	-	1507	2115
ENSDARG00000002710	ENSDART00000017188	22	14	14	CTCCGCCGCCTCTTTCTCTGTCGTT	7	-	1621	2115
ENSDARG00000002710	ENSDART00000017188	22	16	16	TCCACCTTCTCCTTTGGGCTTGGCG	7	-	1887	2115
ENSDARG00000002909	ENSDART00000012336	22	3	2	TGCCGCGTCCCCATTTGCTGGGTTG	7	-	108	1530
ENSDARG00000002909	ENSDART00000012336	22	3	2	TGCCGCGTCCCCATTTGCTGGGTT	6	-	109	1530
ENSDARG00000002909	ENSDART00000012336	22	3	2	CGCGTCCCCATTTGCTGGGTTGGGT	7	-	105	1530
ENSDARG00000002909	ENSDART00000012336	22	3	2	CACTGCCGCGTCCCCATTTGCTGGG	7	-	111	1530
ENSDARG00000002909	ENSDART00000012336	22	3	2	CGCGTCCCCATTTGCTGGGTTGGG	6	-	106	1530
ENSDARG00000002909	ENSDART00000012336	22	4	3	CACTTCCTCAGATTCTGTATGGTGT	7	-	242	1530
ENSDARG00000002909	ENSDART00000012336	22	4	3	TTACTCACAATGTTAGCGGTCTTC	6	-	270	1530
ENSDARG00000002909	ENSDART00000012336	22	5	4	ATCGTCTAAAATGTTGGACTGAGAG	7	-	345	1530
ENSDARG00000002909	ENSDART00000012336	22	6	5	GAAAACAGAGTGCTGTAGTTTTT	5	-	694	1530
ENSDARG00000002909	ENSDART00000012336	22	7	6	AGAAACCCAGACAGGCTTAGACTGC	7	-	786	1530
ENSDARG00000002909	ENSDART00000012336	22	7	6	AAACCCAGACAGGCTTAGACTGC	5	-	786	1530
ENSDARG00000002909	ENSDART00000012336	22	7	6	ACAGGCTTAGACTGCTGTTGCCGAA	7	-	776	1530
ENSDARG00000002909	ENSDART00000012336	22	7	6	ACATCATACCACATGTTTGTATTT	6	-	738	1530
ENSDARG00000002909	ENSDART00000012336	22	8	7	TTCCTCCTCCTCGTGTAGGTTGT	5	-	1058	1530
ENSDARG00000002909	ENSDART00000012336	22	8	7	AACAACATCATCATTGCTGAAGTC	6	-	1216	1530
ENSDARG00000002909	ENSDART00000012336	22	8	7	GTAGGCTTCACCGTCTGTGAAGGC	6	-	919	1530
ENSDARG00000002909	ENSDART00000012336	22	8	7	GCCAGCGCAGAGCTGCGGTGTTT	5	-	985	1530
ENSDARG00000002909	ENSDART00000012336	22	8	7	CTCTTCCTCCTCCTCGTGTAGGTT	6	-	1060	1530
ENSDARG00000002909	ENSDART00000012336	22	8	7	CTCCTCCTCGTGTAGGTTGTAGGG	6	-	1054	1530
ENSDARG00000002909	ENSDART00000012336	22	10	9	TTCGTCTTCATCTCTGTCGTTTTC	6	-	1471	1530
ENSDARG00000002917	ENSDART00000024331	22	3	3	TTCTTCATCAAGCGAGAGTTTGTT	6	-	358	1311
ENSDARG00000002917	ENSDART00000024331	22	9	9	ACATCCCGCAGGAGTGCATGAGAC	6	-	776	1311
ENSDARG00000002917	ENSDART00000024331	22	9	9	TTACGCTGCCCGACTCGCAGGTGAC	7	-	667	1311
ENSDARG00000002917	ENSDART00000024331	22	10	10	CCCGACACACCAGATTTAGCAGGT	6	-	837	1311
ENSDARG00000002917	ENSDART00000024331	22	11	11	ATCACCAGACTGCCTGCGAGGGT	5	-	1025	1311
ENSDARG00000002917	ENSDART00000024331	22	12	12	AACATCTCCACTGTGGGCCGCAAAC	7	-	1104	1311
ENSDARG00000002917	ENSDART00000024331	22	13	13	AGCAGCTACGTGAAGAGGTGTAC	5	-	1190	1311
ENSDARG00000002917	ENSDART00000024331	22	13	13	AGCAGCAGCTACGTGAAGAGGTG	5	-	1193	1311
ENSDARG00000002917	ENSDART00000024331	22	13	13	AAAGTCTACCTTCAGCAGCAGCT	5	-	1206	1311
ENSDARG00000002917	ENSDART00000031005	22	2	2	TTATTCGTCATATTTCTGCTTTC	5	-	250	1881
ENSDARG00000002917	ENSDART00000031005	22	3	3	GAAGTCAGCAATCCGGTGCTTTT	5	-	364	1881
ENSDARG00000002917	ENSDART00000031005	22	6	6	TTCTTCATCAAGCGAGAGTTTGTT	6	-	829	1881
ENSDARG00000002917	ENSDART00000031005	22	12	12	TTACGCTGCCCGACTCGCAGGTGAC	7	-	1138	1881
ENSDARG00000002917	ENSDART00000031005	22	12	12	ACATCCCGCAGGAGTGCATGAGAC	6	-	1247	1881
ENSDARG00000002917	ENSDART00000031005	22	13	13	CCCGACACACCAGATTTAGCAGGT	6	-	1308	1881
ENSDARG00000002917	ENSDART00000031005	22	14	14	ATCACCAGACTGCCTGCGAGGGT	5	-	1496	1881
ENSDARG00000002917	ENSDART00000031005	22	15	15	AACATCTCCACTGTGGGCCGCAAAC	7	-	1548	1881
ENSDARG00000002917	ENSDART00000031005	22	16	16	AGCAGCTACGTGAAGAGGTGTAC	5	-	1634	1881
ENSDARG00000002917	ENSDART00000031005	22	16	16	AGCAGCAGCTACGTGAAGAGGTG	5	-	1637	1881
ENSDARG00000002917	ENSDART00000031005	22	16	16	AAAGTCTACCTTCAGCAGCAGCT	5	-	1650	1881
ENSDARG00000002917	ENSDART00000031005	22	18	18	CACCCCAGAGATGAGCATTTGGA	5	-	1858	1881
ENSDARG00000002917	ENSDART00000031005	22	18	18	TACACCCCAGAGATGAGCATTTGGA	7	-	1858	1881
ENSDARG00000003087	ENSDART00000017755	22	7	7	TTCTCCATCAATCGGCAGCGTGC	5	-	674	1311
ENSDARG00000003087	ENSDART00000017755	22	8	8	TTCTTCAGCTCCTCTGCGCTGAG	5	-	880	1311
ENSDARG00000003087	ENSDART00000017755	22	8	8	GGCGGCAGCTCAAAGTGTGTGGCG	6	-	843	1311
ENSDARG00000003087	ENSDART00000017755	22	8	8	TTCTGCAGCCGCTCCAGATGAATCT	7	-	758	1311
ENSDARG00000003087	ENSDART00000017755	22	8	8	TGCTTCGCCTTTCTGCAGCCGCT	5	-	770	1311
ENSDARG00000003087	ENSDART00000017755	22	8	8	TTCAGCTCCTCTGCGCTGAGGTT	5	-	877	1311
ENSDARG00000003087	ENSDART00000017755	22	8	8	AACTGCTTCGCCTTTCTGCAGCC	5	-	773	1311
ENSDARG00000003087	ENSDART00000017755	22	9	9	CTCAAAAGCGCATAGTTGTATTT	5	-	994	1311
ENSDARG00000003087	ENSDART00000017755	22	9	9	CTCTCAAAAGCGCATAGTTGTATTT	7	-	994	1311
ENSDARG00000003087	ENSDART00000017755	22	10	10	TTCATCATCCTTCAGTTTTTGTC	5	-	1148	1311
ENSDARG00000003087	ENSDART00000017755	22	11	11	TCCTCCGGCAGCGGCGATGTCGGC	6	-	1243	1311
ENSDARG00000003087	ENSDART00000017755	22	11	11	CACTGCAGCGTCCCAGGAGAAGGT	6	-	1216	1311
ENSDARG00000003102	ENSDART00000013201	22	2	2	ACCTACAAAGCTGAACGAGGAGGAA	7	+	66	1116
ENSDARG00000003102	ENSDART00000013201	22	2	2	AGAAAAGCCGCACGTTTGTTTGC	5	+	420	1116
ENSDARG00000003102	ENSDART00000013201	22	2	2	CTACAAAGCTGAACGAGGAGGAA	5	+	68	1116
ENSDARG00000003102	ENSDART00000013201	22	2	2	GTTTCAGGCGGGCGAGCCGTTTGT	6	+	1044	1116
ENSDARG00000003102	ENSDART00000063575	22	1	1	TGCGTCCACTGCGGGAAGACGTT	5	+	274	864
ENSDARG00000003102	ENSDART00000063575	22	1	1	GTTCACACCGGGGAGAAGCCGTA	5	+	163	864
ENSDARG00000003102	ENSDART00000063575	22	1	1	GTCCACTGCGGGAAGACGTTTGC	5	+	277	864
ENSDARG00000003102	ENSDART00000063575	22	1	1	CGCCACCGCGTTCGCTGTGAGGAA	6	+	465	864
ENSDARG00000003102	ENSDART00000063575	22	1	1	AGAAAAACCGTTTCCGTGTGAGCA	6	+	426	864
ENSDARG00000003102	ENSDART00000106632	22	3	3	AGAAAAACCGTTTCCGTGTGAGCA	6	+	420	843
ENSDARG00000003102	ENSDART00000106632	22	3	3	CGCCACCGCGTTCGCTGTGAGGAA	6	+	459	843
ENSDARG00000003102	ENSDART00000106632	22	3	3	GTCCACTGCGGGAAGACGTTTGC	5	+	271	843
ENSDARG00000003102	ENSDART00000106632	22	3	3	TGCGTCCACTGCGGGAAGACGTT	5	+	268	843
ENSDARG00000003102	ENSDART00000106633	22	1	1	ACCTACAAAGCTGAACGAGGAGGAA	7	+	27	1077
ENSDARG00000003102	ENSDART00000106633	22	1	1	CTACAAAGCTGAACGAGGAGGAA	5	+	29	1077
ENSDARG00000003102	ENSDART00000106633	22	3	3	TGCGTCCACTGCGGGAAGACGTT	5	+	661	1077
ENSDARG00000003102	ENSDART00000106633	22	3	3	GTTCACACCGGGGAGAAGCCGTA	5	+	550	1077
ENSDARG00000003102	ENSDART00000106633	22	3	3	GTCCACTGCGGGAAGACGTTTGC	5	+	664	1077
ENSDARG00000003102	ENSDART00000106634	22	1	1	CCCTTCAGAATTAAAGAGGAAGAG	6	+	67	1299
ENSDARG00000003102	ENSDART00000106634	22	1	1	TGCAAAGACGAAAAAGAAGAGTTT	6	+	9	1299
ENSDARG00000003102	ENSDART00000106634	22	2	2	ACCTACAAAGCTGAACGAGGAGGAA	7	+	129	1299
ENSDARG00000003102	ENSDART00000106634	22	2	2	CTACAAAGCTGAACGAGGAGGAA	5	+	131	1299
ENSDARG00000003102	ENSDART00000106634	22	4	4	TGCGTCCACTGCGGGAAGACGTT	5	+	820	1299
ENSDARG00000003102	ENSDART00000106634	22	4	4	GTTCACACCGGGGAGAAGCCGTA	5	+	709	1299
ENSDARG00000003102	ENSDART00000106634	22	4	4	GTCCACTGCGGGAAGACGTTTGC	5	+	823	1299
ENSDARG00000003102	ENSDART00000106634	22	4	4	CGCCACCGCGTTCGCTGTGAGGAA	6	+	1011	1299
ENSDARG00000003102	ENSDART00000106634	22	4	4	AGAAAAACCGTTTCCGTGTGAGCA	6	+	972	1299
ENSDARG00000003102	ENSDART00000106635	22	2	2	TGCAAAGACGAAAAAGAAGAGTTT	6	+	45	1047
ENSDARG00000003102	ENSDART00000106635	22	2	2	CCCTTCAGAATTAAAGAGGAAGAG	6	+	103	1047
ENSDARG00000003102	ENSDART00000106635	22	3	3	CTACAAAGCTGAACGAGGAGGAA	5	+	167	1047
ENSDARG00000003102	ENSDART00000106635	22	3	3	ACCTACAAAGCTGAACGAGGAGGAA	7	+	165	1047
ENSDARG00000003102	ENSDART00000106635	22	5	5	AGAAAAACCGTTTCCGTGTGAGCA	6	+	765	1047
ENSDARG00000003102	ENSDART00000106635	22	5	5	CGCCACCGCGTTCGCTGTGAGGAA	6	+	804	1047
ENSDARG00000003102	ENSDART00000106635	22	5	5	GTCCACTGCGGGAAGACGTTTGC	5	+	616	1047
ENSDARG00000003102	ENSDART00000106635	22	5	5	TGCGTCCACTGCGGGAAGACGTT	5	+	613	1047
ENSDARG00000003189	ENSDART00000007346	22	4	4	AGACTCGTCGAAAGCGCCGAGGTG	6	-	214	2655
ENSDARG00000003189	ENSDART00000007346	22	4	4	GAAAGCGCCGAGGTGGTAGAAGAC	6	-	205	2655
ENSDARG00000003189	ENSDART00000007346	22	4	4	TCCAGCGCCCAGTGCGTAGCTTAA	6	-	238	2655
ENSDARG00000003189	ENSDART00000007346	22	5	5	GTTCTCAACACGCTGCTTGGTGT	5	-	329	2655
ENSDARG00000003189	ENSDART00000007346	22	5	5	ACATACAGACTCCAGGATGGTTTT	6	-	502	2655
ENSDARG00000003189	ENSDART00000007346	22	5	5	CTCTTCCTCCGGCAGCTCTGCGTTC	7	-	348	2655
ENSDARG00000003189	ENSDART00000007346	22	5	5	CCCTCCAGACGAGGGTCGATGTC	5	-	382	2655
ENSDARG00000003189	ENSDART00000007346	22	5	5	ACATACAGACTCCAGGATGGTTT	5	-	503	2655
ENSDARG00000003189	ENSDART00000007346	22	8	8	AGACTCACAGCGTCTGCCGTTTTC	6	-	936	2655
ENSDARG00000003189	ENSDART00000007346	22	12	12	GGCTCAGCAGGTAGTCGATGATGTC	7	-	1375	2655
ENSDARG00000003189	ENSDART00000007346	22	14	14	TACATCACCATGGCGATGCCGAC	5	-	1657	2655
ENSDARG00000003189	ENSDART00000007346	22	15	15	GCAGGCGTCGGATGGCTTTGTTG	5	-	1794	2655
ENSDARG00000003189	ENSDART00000007346	22	15	15	CACAGCCACGTGCAGCAGGCGTC	5	-	1808	2655
ENSDARG00000003189	ENSDART00000007346	22	15	15	AGACTCACAGCCACGTGCAGCAGGC	7	-	1811	2655
ENSDARG00000003189	ENSDART00000007346	22	15	15	GCAGGCGTCGGATGGCTTTGTTGTT	7	-	1792	2655
ENSDARG00000003189	ENSDART00000007346	22	20	20	ACAGACGGCATGTGTGTGTGGCC	5	-	2266	2655
ENSDARG00000003189	ENSDART00000007346	22	20	20	CACCACAGACGGCATGTGTGTGT	5	-	2270	2655
ENSDARG00000003189	ENSDART00000007346	22	20	20	CCCACCACAGACGGCATGTGTGTGT	7	-	2270	2655
ENSDARG00000003189	ENSDART00000007346	22	23	23	TCCTTCTTCTTGGCTTTAGCAGTG	6	-	2510	2655
ENSDARG00000003189	ENSDART00000007346	22	24	24	TCCATCATCTGGAAGTTTGGCTCT	6	-	2648	2655
ENSDARG00000003446	ENSDART00000019615	22	5	5	CTCAACGCAGATTGGAGGTCTGT	5	-	515	1557
ENSDARG00000003446	ENSDART00000019615	22	5	5	CAACGCAGATTGGAGGTCTGTGGTC	7	-	511	1557
ENSDARG00000003446	ENSDART00000019615	22	6	6	ATCTGCAAACTTTCCATTTGCATTC	7	-	586	1557
ENSDARG00000003446	ENSDART00000019615	22	9	9	GGCTTCACAGTGTGGTTTGCTTTC	6	-	991	1557
ENSDARG00000003446	ENSDART00000019615	22	10	10	TCCAGCATCTGAACTTGGAGGATTT	7	-	1082	1557
ENSDARG00000003446	ENSDART00000019615	22	13	13	TTCTCCAGATTCAGCTTGTGTCTGT	7	-	1361	1557
ENSDARG00000003533	ENSDART00000019846	22	1	1	GGCCCAGCCATGTCCTGTTGAATAG	7	-	5	2208
ENSDARG00000003533	ENSDART00000019846	22	1	1	GCCCCCGCATGGATATGATGTAGCA	7	-	74	2208
ENSDARG00000003533	ENSDART00000019846	22	2	2	GCCCAAAAAATGAAGCTTGAGCA	5	-	1707	2208
ENSDARG00000003533	ENSDART00000019846	22	2	2	TCCTGCTGCTTGCTCTGATGGTAAC	7	-	2136	2208
ENSDARG00000003533	ENSDART00000019846	22	2	2	TGCCCAAAAAATGAAGCTTGAGCA	6	-	1707	2208
ENSDARG00000003533	ENSDART00000019846	22	2	2	TTATGCAAAATTTTGTTGAAGAC	5	-	1885	2208
ENSDARG00000003533	ENSDART00000060057	22	1	1	GCCCCCGCATGGATATGATGTAGCA	7	-	65	2220
ENSDARG00000003533	ENSDART00000060057	22	3	3	GCCCAAAAAATGAAGCTTGAGCA	5	-	1719	2220
ENSDARG00000003533	ENSDART00000060057	22	3	3	TCCTGCTGCTTGCTCTGATGGTAAC	7	-	2148	2220
ENSDARG00000003533	ENSDART00000060057	22	3	3	TGCCCAAAAAATGAAGCTTGAGCA	6	-	1719	2220
ENSDARG00000003533	ENSDART00000060057	22	3	3	TTATGCAAAATTTTGTTGAAGAC	5	-	1897	2220
ENSDARG00000003655	ENSDART00000027345	22	1	1	TTCGGCGGCAGGGTGCGCGGAGTTC	7	+	19	1017
ENSDARG00000003655	ENSDART00000027345	22	1	1	GGCATCATCTGATCTGTTTGACAAC	7	+	81	1017
ENSDARG00000003655	ENSDART00000027345	22	1	1	AGATGCTCCAGTTCGGCGGCAGGG	6	+	8	1017
ENSDARG00000003655	ENSDART00000027345	22	2	2	TACTCCATCTGCCAGTTTGTGAAC	6	+	214	1017
ENSDARG00000003655	ENSDART00000027345	22	3	3	GTTTGCAGCCTGCCAGGAGGCCTAC	7	+	273	1017
ENSDARG00000003655	ENSDART00000027345	22	3	3	GTAAACTGCTGGAGCAGGAGGCGTG	7	+	299	1017
ENSDARG00000003655	ENSDART00000027345	22	4	4	CCCATCTCCGTAATGGAGGCCGTG	6	+	403	1017
ENSDARG00000003655	ENSDART00000027345	22	4	4	ACCTTCTACTTGCAGGCCGATGAT	6	+	484	1017
ENSDARG00000003655	ENSDART00000027345	22	6	6	GAATGCAGCAAAACCTGGGGTGAA	6	+	660	1017
ENSDARG00000003655	ENSDART00000027345	22	6	6	AACGTCAGCCAACATGCCGAGGAC	6	+	691	1017
ENSDARG00000003952	ENSDART00000004557	22	2	2	ACAAGCACATCGATTTCTGTGGGC	6	-	141	420
ENSDARG00000003952	ENSDART00000104687	22	2	2	ACAAGCACATCGATTTCTGTGGGC	6	-	141	420
ENSDARG00000004502	ENSDART00000024008	22	6	6	GTTTTCACAGGATCCAGCAGATGGT	7	+	461	1653
ENSDARG00000004502	ENSDART00000024008	22	7	7	GACAAATCCATATCCAGTCTTGTAA	7	+	490	1653
ENSDARG00000004502	ENSDART00000024008	22	8	8	AGAGGCTAACCCTGTGGAGGCCAAC	7	+	624	1653
ENSDARG00000004502	ENSDART00000024008	22	8	8	AACAAAAGAGGCAAAGAAGGAGGT	6	+	666	1653
ENSDARG00000004502	ENSDART00000024008	22	10	10	TGCGGCAGCTCGACATGGAGCTGGT	7	+	875	1653
ENSDARG00000004502	ENSDART00000024008	22	10	10	TCCTGCAGCTCCAGCGCCGCCAAC	6	+	844	1653
ENSDARG00000004502	ENSDART00000024008	22	10	10	CGCCAACTCTGTGCTGCGGCAGCT	6	+	861	1653
ENSDARG00000004502	ENSDART00000024008	22	10	10	AGCGCCGCCAACTCTGTGCTGCG	5	+	856	1653
ENSDARG00000004502	ENSDART00000024008	22	10	10	GCCGCCAACTCTGTGCTGCGGCA	5	+	859	1653
ENSDARG00000004502	ENSDART00000024008	22	10	10	GACTCCAGCAGAACCGCAGACTCT	6	+	696	1653
ENSDARG00000004502	ENSDART00000024008	22	11	11	AACTCAGACTGCCTGAGGTGACTTT	7	+	977	1653
ENSDARG00000004502	ENSDART00000024008	22	12	12	GACCACAGATGAGCAGCTGCTGGC	6	+	1020	1653
ENSDARG00000004502	ENSDART00000024008	22	12	12	AGCAGCTGCTGGCAGTGCAGGGTAA	7	+	1031	1653
ENSDARG00000004502	ENSDART00000024008	22	13	13	AGCCAATTCAGGAGAGGATGGTAA	6	+	1221	1653
ENSDARG00000004502	ENSDART00000024008	22	14	14	GACAGCAGCCGCCAGCTCTGCTGGG	7	+	1607	1653
ENSDARG00000004502	ENSDART00000024008	22	14	14	AGCAGCCGCCAGCTCTGCTGGGCA	6	+	1610	1653
ENSDARG00000004502	ENSDART00000024008	22	14	14	TCCAGCAGCCTCCGCCTCTGCTGCG	7	+	1388	1653
ENSDARG00000004502	ENSDART00000024008	22	14	14	GCCTCCACCTCTGCAGCAGCAGGC	6	+	1449	1653
ENSDARG00000004502	ENSDART00000024008	22	14	14	ATCGCCAGCCTCCACCTCTGCAGCA	7	+	1442	1653
ENSDARG00000004502	ENSDART00000024008	22	14	14	GCCAGCCTCCACCTCTGCAGCAGCA	7	+	1445	1653
ENSDARG00000004502	ENSDART00000024008	22	14	14	GCAGCCGCCAGCTCTGCTGGGCA	5	+	1611	1653
ENSDARG00000004502	ENSDART00000024008	22	14	14	CCCTGCAGCAGGACAGCAGCCGCC	6	+	1596	1653
ENSDARG00000004502	ENSDART00000024008	22	14	14	AGCCTCCACCTCTGCAGCAGCAGGC	7	+	1448	1653
ENSDARG00000004502	ENSDART00000104497	22	5	5	GTTTTCACAGGATCCAGCAGATGGT	7	+	464	945
ENSDARG00000004502	ENSDART00000104497	22	6	6	GACAAATCCATATCCAGTCTTGTAA	7	+	493	945
ENSDARG00000004502	ENSDART00000104497	22	7	7	AGAGGCTAACCCTGTGGAGGCCAAC	7	+	627	945
ENSDARG00000004502	ENSDART00000104497	22	7	7	AACAAAAGAGGCAAAGAAGGAGGT	6	+	669	945
ENSDARG00000004502	ENSDART00000104497	22	10	10	AGCGCCGCCAACTCTGTGCTGCG	5	+	895	945
ENSDARG00000004502	ENSDART00000104497	22	10	10	CGCCAACTCTGTGCTGCGGCAGCT	6	+	900	945
ENSDARG00000004502	ENSDART00000104497	22	10	10	GACTCCAGCAGAACCGCAGACTCT	6	+	735	945
ENSDARG00000004502	ENSDART00000104497	22	10	10	GCCGCCAACTCTGTGCTGCGGCA	5	+	898	945
ENSDARG00000004502	ENSDART00000104497	22	10	10	TCCTGCAGCTCCAGCGCCGCCAAC	6	+	883	945
ENSDARG00000004502	ENSDART00000104497	22	10	10	TGCGGCAGCTCGACATGGAGCTGGT	7	+	914	945
ENSDARG00000004502	ENSDART00000104498	22	5	5	GTTTTCACAGGATCCAGCAGATGGT	7	+	461	1641
ENSDARG00000004502	ENSDART00000104498	22	6	6	GACAAATCCATATCCAGTCTTGTAA	7	+	490	1641
ENSDARG00000004502	ENSDART00000104498	22	7	7	AGAGGCTAACCCTGTGGAGGCCAAC	7	+	624	1641
ENSDARG00000004502	ENSDART00000104498	22	7	7	AACAAAAGAGGCAAAGAAGGAGGT	6	+	666	1641
ENSDARG00000004502	ENSDART00000104498	22	8	8	AGCGCCGCCAACTCTGTGCTGCG	5	+	853	1641
ENSDARG00000004502	ENSDART00000104498	22	8	8	GACTCCAGCAGAACCGCAGACTCT	6	+	693	1641
ENSDARG00000004502	ENSDART00000104498	22	8	8	GCCGCCAACTCTGTGCTGCGGCA	5	+	856	1641
ENSDARG00000004502	ENSDART00000104498	22	8	8	TCCTGCAGCTCCAGCGCCGCCAAC	6	+	841	1641
ENSDARG00000004502	ENSDART00000104498	22	8	8	TGCGGCAGCTCGACATGGAGCTGGT	7	+	872	1641
ENSDARG00000004502	ENSDART00000104498	22	8	8	CGCCAACTCTGTGCTGCGGCAGCT	6	+	858	1641
ENSDARG00000004502	ENSDART00000104498	22	9	9	AACTCAGACTGCCTGAGGTGACTTT	7	+	974	1641
ENSDARG00000004502	ENSDART00000104498	22	10	10	AGCAGCTGCTGGCAGTGCAGGGTAA	7	+	1028	1641
ENSDARG00000004502	ENSDART00000104498	22	10	10	GACCACAGATGAGCAGCTGCTGGC	6	+	1017	1641
ENSDARG00000004502	ENSDART00000104498	22	11	11	AGCCAATTCAGGAGAGGATGGTAA	6	+	1218	1641
ENSDARG00000004502	ENSDART00000104498	22	12	12	GACAGCAGCCGCCAGCTCTGCTGGG	7	+	1589	1641
ENSDARG00000004502	ENSDART00000104498	22	12	12	AGCAGCCGCCAGCTCTGCTGGGCA	6	+	1592	1641
ENSDARG00000004502	ENSDART00000104498	22	12	12	AGCCTCCACCTCTGCAGCAGCAGGC	7	+	1430	1641
ENSDARG00000004502	ENSDART00000104498	22	12	12	TCCAGCAGCCTCCGCCTCTGCTGCG	7	+	1370	1641
ENSDARG00000004502	ENSDART00000104498	22	12	12	ATCGCCAGCCTCCACCTCTGCAGCA	7	+	1424	1641
ENSDARG00000004502	ENSDART00000104498	22	12	12	GCCTCCACCTCTGCAGCAGCAGGC	6	+	1431	1641
ENSDARG00000004502	ENSDART00000104498	22	12	12	CCCTGCAGCAGGACAGCAGCCGCC	6	+	1578	1641
ENSDARG00000004502	ENSDART00000104498	22	12	12	GCCAGCCTCCACCTCTGCAGCAGCA	7	+	1427	1641
ENSDARG00000004502	ENSDART00000104498	22	12	12	GCAGCCGCCAGCTCTGCTGGGCA	5	+	1593	1641
ENSDARG00000004789	ENSDART00000004416	22	1	1	GGCCTCAACTGTGTGTCTGAGAG	5	+	40	2697
ENSDARG00000004789	ENSDART00000004416	22	3	3	CCCCTCAGAGTTGGTGCGCAGCT	5	+	252	2697
ENSDARG00000004789	ENSDART00000004416	22	3	3	CGCAGCTGCCAGGAGCGGAGGTG	5	+	268	2697
ENSDARG00000004789	ENSDART00000004416	22	3	3	CGCAGCTGCCAGGAGCGGAGGTGTC	7	+	268	2697
ENSDARG00000004789	ENSDART00000004416	22	5	5	AAAAACACCAGATACGGATAGGCC	6	+	731	2697
ENSDARG00000004789	ENSDART00000004416	22	5	5	GAAAAACACCAGATACGGATAGGCC	7	+	730	2697
ENSDARG00000004789	ENSDART00000004416	22	7	7	ACAGCCAACCGCTGTGACGTTGGA	6	+	1026	2697
ENSDARG00000004789	ENSDART00000004416	22	9	9	CTACAAATCACGCGTGTGCCGCT	5	+	1416	2697
ENSDARG00000004789	ENSDART00000004416	22	9	9	AAATCACGCGTGTGCCGCTGCCGGA	7	+	1420	2697
ENSDARG00000004789	ENSDART00000004416	22	9	9	AACTACAAATCACGCGTGTGCCGCT	7	+	1414	2697
ENSDARG00000004789	ENSDART00000004416	22	10	10	CAATCCTTAAGGAGGGTGTGTTT	5	+	1706	2697
ENSDARG00000004789	ENSDART00000004416	22	10	10	AAACAATCCTTAAGGAGGGTGTG	5	+	1703	2697
ENSDARG00000004789	ENSDART00000004416	22	10	10	TTCCTAATCGGACGGCAGAAGAT	5	+	1663	2697
ENSDARG00000004789	ENSDART00000004416	22	11	11	AAAACCATCAACGTGGCTGGGCT	5	+	1795	2697
ENSDARG00000004789	ENSDART00000004416	22	11	11	ACCATCAACGTGGCTGGGCTGGA	5	+	1798	2697
ENSDARG00000004789	ENSDART00000004416	22	11	11	AGAAAAACCATCAACGTGGCTGGG	6	+	1792	2697
ENSDARG00000004789	ENSDART00000004416	22	12	12	GGCAGCCACAGAACGGTTAGTAA	5	+	2107	2697
ENSDARG00000004789	ENSDART00000004416	22	13	13	GTCTACAGCGGGAAAGAGTTGAAC	6	+	2125	2697
ENSDARG00000004789	ENSDART00000004416	22	14	14	CACAACGCCTGCAGGACGGGTTT	5	+	2367	2697
ENSDARG00000004789	ENSDART00000004416	22	14	14	AACGCCTGCAGGACGGGTTTGCG	5	+	2370	2697
ENSDARG00000004789	ENSDART00000004416	22	15	15	CCCATCAGAGGTCACTAAGATTAA	6	+	2442	2697
ENSDARG00000004789	ENSDART00000004416	22	15	15	AAACGCTGCAGCCCAGCAGAATTC	6	+	2464	2697
ENSDARG00000004789	ENSDART00000004416	22	16	16	GACGGCACAGACGACTGTGGCAGCA	7	+	2653	2697
ENSDARG00000004840	ENSDART00000038465	22	1	1	TGCCCACTCTGGACAGGTGGAGCA	6	+	101	1089
ENSDARG00000004840	ENSDART00000038465	22	2	2	TCCAACACCGACACTATCTGCGAAC	7	+	358	1089
ENSDARG00000004840	ENSDART00000038465	22	3	3	AACCTCTTCATGGTTCTGGTGAGGA	7	+	520	1089
ENSDARG00000004840	ENSDART00000038465	22	3	3	AACCTCTTCATGGTTCTGGTGAG	5	+	520	1089
ENSDARG00000004840	ENSDART00000038465	22	4	4	TGCTCAACAAGTTCACTGTGGTGGA	7	+	761	1089
ENSDARG00000004840	ENSDART00000038465	22	4	4	TCCATCTCCTCCTCTTGTTTAGGAT	7	+	631	1089
ENSDARG00000004840	ENSDART00000038465	22	4	4	CTCTTCCTCCTCCCCGCAGCGTCT	6	+	599	1089
ENSDARG00000004840	ENSDART00000038465	22	4	4	CTCCTCCTCTTGTTTAGGATGGGAT	7	+	636	1089
ENSDARG00000004840	ENSDART00000038465	22	6	6	AACTCCAGAACTTCCTGCGGATTCT	7	+	974	1089
ENSDARG00000004840	ENSDART00000038465	22	6	6	AACTCCAGAACTTCCTGCGGATTC	6	+	974	1089
ENSDARG00000004840	ENSDART00000081236	22	1	1	GCAGCCAGAGCGACTCTGACGAG	5	+	158	909
ENSDARG00000004840	ENSDART00000081236	22	2	2	AACCTCTTCATGGTTCTGGTGAG	5	+	340	909
ENSDARG00000004840	ENSDART00000081236	22	2	2	AACCTCTTCATGGTTCTGGTGAGGA	7	+	340	909
ENSDARG00000004840	ENSDART00000081236	22	3	3	TGCTCAACAAGTTCACTGTGGTGGA	7	+	581	909
ENSDARG00000004840	ENSDART00000081236	22	3	3	TCCATCTCCTCCTCTTGTTTAGGAT	7	+	451	909
ENSDARG00000004840	ENSDART00000081236	22	3	3	CTCCTCCTCTTGTTTAGGATGGGAT	7	+	456	909
ENSDARG00000004840	ENSDART00000081236	22	3	3	CTCTTCCTCCTCCCCGCAGCGTCT	6	+	419	909
ENSDARG00000004840	ENSDART00000081236	22	5	5	AACTCCAGAACTTCCTGCGGATTCT	7	+	794	909
ENSDARG00000004840	ENSDART00000081236	22	5	5	AACTCCAGAACTTCCTGCGGATTC	6	+	794	909
ENSDARG00000004845	ENSDART00000010824	22	2	2	TACCTCCACTTTCTGCATGGGTA	5	-	185	1260
ENSDARG00000004845	ENSDART00000010824	22	4	4	CACAGCAGCGAATGGATGATGTT	5	-	320	1260
ENSDARG00000004845	ENSDART00000010824	22	6	6	TTCAGCTTCTGAAATTCTGGATGC	6	-	525	1260
ENSDARG00000004932	ENSDART00000003736	22	1	1	GTTTTCTGCTCTGCTGTGTGTTT	5	+	35	1899
ENSDARG00000004932	ENSDART00000003736	22	3	3	CAACCATGCAAGGAATTATGGGAA	6	+	238	1899
ENSDARG00000004932	ENSDART00000003736	22	5	5	TTCACCCCAGTGAGGACGAAGCG	5	+	638	1899
ENSDARG00000004932	ENSDART00000003736	22	5	5	AACGTCTCCGTCGAGCCGGTGCT	5	+	583	1899
ENSDARG00000004932	ENSDART00000003736	22	8	8	AGAATCGGCTGAAGAGCAGCCGAG	6	+	1094	1899
ENSDARG00000004932	ENSDART00000003736	22	10	10	AACGGCGACAGTTCAGGTGTGTCT	6	+	1374	1899
ENSDARG00000004932	ENSDART00000003736	22	12	12	AACGGCTCCCTGCAGGCGCTTTT	5	+	1621	1899
ENSDARG00000005749	ENSDART00000019590	22	7	7	GTCAGCATCATAGTTGTAATTGGGG	7	-	933	3423
ENSDARG00000005749	ENSDART00000019590	22	10	10	AGCACCTCCTTGTAGCAGTGGAG	5	-	2234	3423
ENSDARG00000005749	ENSDART00000019590	22	10	10	TTCGGCTACAATATTGCGAGTAC	5	-	2849	3423
ENSDARG00000005749	ENSDART00000019590	22	10	10	GTTTTCCACATGAGGTTTGAGAC	5	-	2783	3423
ENSDARG00000005749	ENSDART00000019590	22	10	10	AACAGCAGAGCCCAGATGTTTTC	5	-	2800	3423
ENSDARG00000005749	ENSDART00000019590	22	10	10	GCATCAATCTTCATATTTGAGGAG	6	-	1470	3423
ENSDARG00000005749	ENSDART00000019590	22	10	10	GAAGACTTCTGGGTTGTGGCTAC	5	-	1520	3423
ENSDARG00000005749	ENSDART00000019590	22	12	12	GTCCAAACAGTCCAGGCAGCTGTC	6	-	3196	3423
ENSDARG00000005749	ENSDART00000022445	22	7	7	GTCAGCATCATAGTTGTAATTGGGG	7	-	933	3693
ENSDARG00000005749	ENSDART00000022445	22	10	10	GTTTTCCACATGAGGTTTGAGAC	5	-	2783	3693
ENSDARG00000005749	ENSDART00000022445	22	10	10	GCATCAATCTTCATATTTGAGGAG	6	-	1470	3693
ENSDARG00000005749	ENSDART00000022445	22	10	10	GAAGACTTCTGGGTTGTGGCTAC	5	-	1520	3693
ENSDARG00000005749	ENSDART00000022445	22	10	10	AGCACCTCCTTGTAGCAGTGGAG	5	-	2234	3693
ENSDARG00000005749	ENSDART00000022445	22	10	10	AACAGCAGAGCCCAGATGTTTTC	5	-	2800	3693
ENSDARG00000005749	ENSDART00000022445	22	10	10	TTCGGCTACAATATTGCGAGTAC	5	-	2849	3693
ENSDARG00000005749	ENSDART00000022445	22	11	11	CAATGCATCCTTTGAGGAGTGAGTC	7	-	3013	3693
ENSDARG00000005749	ENSDART00000022445	22	13	13	GTCCAAACAGTCCAGGCAGCTGTC	6	-	3292	3693
ENSDARG00000005749	ENSDART00000022445	22	15	15	TTCCACAGCTCCTGCTAAGGGGTC	6	-	3664	3693
ENSDARG00000005783	ENSDART00000005724	22	1	1	TTCTTCACCTTGATGATGTTGTC	5	-	190	960
ENSDARG00000005783	ENSDART00000005724	22	1	1	TGCCAACCACGACCTCGCAGCGGTA	7	-	310	960
ENSDARG00000005783	ENSDART00000005724	22	1	1	GTCAGCACCAAGCTGGCGTTGTAG	6	-	258	960
ENSDARG00000005783	ENSDART00000005724	22	1	1	GCACCAAGCTGGCGTTGTAGCGGTT	7	-	253	960
ENSDARG00000005783	ENSDART00000005724	22	1	1	GCCAACCACGACCTCGCAGCGGTA	6	-	310	960
ENSDARG00000005783	ENSDART00000005724	22	1	1	GTCAGCACCAAGCTGGCGTTGTA	5	-	259	960
ENSDARG00000005783	ENSDART00000005724	22	2	2	AGCTGCGCCGGTGTGGCGATGTT	5	-	460	960
ENSDARG00000005783	ENSDART00000005724	22	4	4	GCCATCGGCCAGCCAGCCGGGGTC	6	-	811	960
ENSDARG00000005783	ENSDART00000005724	22	4	4	CCCTCCGCAGTTACGCCGGGGCA	5	-	857	960
ENSDARG00000005783	ENSDART00000005724	22	4	4	CCCCTCCGCAGTTACGCCGGGGCA	6	-	857	960
ENSDARG00000005783	ENSDART00000005724	22	4	4	AGCATCAAAGAGATCAGTAGTGTCT	7	-	933	960
ENSDARG00000006052	ENSDART00000008424	22	2	1	GTTTCCAGCCACACTCTGCATTG	5	-	81	2418
ENSDARG00000006052	ENSDART00000008424	22	2	1	TCCAGCCACACTCTGCATTGTCT	5	-	78	2418
ENSDARG00000006052	ENSDART00000008424	22	4	3	CCCCTCTGCTATCCGCTGACTCT	5	-	347	2418
ENSDARG00000006052	ENSDART00000008424	22	5	4	TTAAACACCAAATCTGGGCTGTT	5	-	457	2418
ENSDARG00000006052	ENSDART00000008424	22	6	5	GTCTCCCTCCATTAACGCTTGAGGC	7	-	657	2418
ENSDARG00000006052	ENSDART00000008424	22	6	5	AAATACCACTGGAACTGTGGAGGC	6	-	717	2418
ENSDARG00000006052	ENSDART00000008424	22	6	5	TTCAACCCACTAGCTGTTGAAGGG	6	-	615	2418
ENSDARG00000006052	ENSDART00000008424	22	6	5	AAATACCACTGGAACTGTGGAGGCG	7	-	716	2418
ENSDARG00000006052	ENSDART00000008424	22	7	6	AAATACCTCTGTCAGCTGTTGTT	5	-	795	2418
ENSDARG00000006052	ENSDART00000008424	22	11	10	AGACAATGCTTGAAGGTGTAGGAG	6	-	1245	2418
ENSDARG00000006052	ENSDART00000008424	22	11	10	AGACAATGCTTGAAGGTGTAGGA	5	-	1246	2418
ENSDARG00000006052	ENSDART00000008424	22	12	11	AGCCAAACACTATGTTTGCTGTC	5	-	1395	2418
ENSDARG00000006052	ENSDART00000008424	22	14	13	AGAGCCTGCCGACCACGAGTGATTT	7	-	1568	2418
ENSDARG00000006052	ENSDART00000008424	22	15	14	GAAGACAGCGGCTCTCTGGGAGGAC	7	-	1702	2418
ENSDARG00000006052	ENSDART00000008424	22	17	16	GTAGACACACAGTAAAGGAGAGTTC	7	-	2002	2418
ENSDARG00000006052	ENSDART00000008424	22	17	16	AGACACACAGTAAAGGAGAGTTC	5	-	2002	2418
ENSDARG00000006052	ENSDART00000008424	22	17	16	AAACTCTTAATGGCGGGAGGTTCT	6	-	2346	2418
ENSDARG00000006079	ENSDART00000009756	22	1	1	GCCAGCAGCAGCACGGCGTAGGC	5	-	67	1143
ENSDARG00000006079	ENSDART00000009756	22	1	1	AGCAGCAGCACGGCGTAGGCGCT	5	-	64	1143
ENSDARG00000006079	ENSDART00000009756	22	1	1	GCCAGCAGCAGCACGGCGTAGGCG	6	-	66	1143
ENSDARG00000006079	ENSDART00000009756	22	2	2	GCAAACTACATATCGCGTAGATGAA	7	-	802	1143
ENSDARG00000006079	ENSDART00000009756	22	2	2	GTCCACCACATGCGGGCGTGTTG	5	-	598	1143
ENSDARG00000006079	ENSDART00000009756	22	2	2	TCCACCACATGCGGGCGTGTTGGTA	7	-	595	1143
ENSDARG00000006079	ENSDART00000009756	22	2	2	TGCTCCAGACGCCACAGCAGCAGCT	7	-	476	1143
ENSDARG00000006079	ENSDART00000009756	22	2	2	GAAAAACACTCCTCGCAGCAGCA	5	-	1003	1143
ENSDARG00000006079	ENSDART00000009756	22	2	2	CTCCTCGCAGCAGCAGCAGCAGCA	6	-	994	1143
ENSDARG00000006079	ENSDART00000009756	22	2	2	AAACACTCCTCGCAGCAGCAGCA	5	-	1000	1143
ENSDARG00000006079	ENSDART00000009756	22	2	2	AACGTCCACCACATGCGGGCGTG	5	-	601	1143
ENSDARG00000006079	ENSDART00000009756	22	2	2	ACACTCCTCGCAGCAGCAGCAGCA	6	-	997	1143
ENSDARG00000006079	ENSDART00000009756	22	2	2	AGAGCCAGCAGAGCCTGTGTGGCC	6	-	879	1143
ENSDARG00000006079	ENSDART00000009756	22	2	2	CACAGCAGCACAACCGGCGTCGCT	6	-	936	1143
ENSDARG00000006079	ENSDART00000009756	22	2	2	CACAGCAGCAGCTCCGGCGCCGCC	6	-	465	1143
ENSDARG00000006079	ENSDART00000105888	22	1	1	GCCAGCAGCAGCACGGCGTAGGCG	6	-	54	1071
ENSDARG00000006079	ENSDART00000105888	22	1	1	GCCAGCAGCAGCACGGCGTAGGC	5	-	55	1071
ENSDARG00000006079	ENSDART00000105888	22	1	1	AGCAGCAGCACGGCGTAGGCGCT	5	-	52	1071
ENSDARG00000006079	ENSDART00000105888	22	2	2	AACGTCCACCACATGCGGGCGTG	5	-	589	1071
ENSDARG00000006079	ENSDART00000105888	22	2	2	TGCTCCAGACGCCACAGCAGCAGCT	7	-	464	1071
ENSDARG00000006079	ENSDART00000105888	22	2	2	CACAGCAGCAGCTCCGGCGCCGCC	6	-	453	1071
ENSDARG00000006079	ENSDART00000105888	22	2	2	TCCACCACATGCGGGCGTGTTGGTA	7	-	583	1071
ENSDARG00000006079	ENSDART00000105888	22	2	2	GTCCACCACATGCGGGCGTGTTG	5	-	586	1071
ENSDARG00000006079	ENSDART00000105888	22	3	3	ACACTCCTCGCAGCAGCAGCAGCA	6	-	943	1071
ENSDARG00000006079	ENSDART00000105888	22	3	3	AAACACTCCTCGCAGCAGCAGCA	5	-	946	1071
ENSDARG00000006079	ENSDART00000105888	22	3	3	AGAGCCAGCAGAGCCTGTGTGGCC	6	-	825	1071
ENSDARG00000006079	ENSDART00000105888	22	3	3	GCAAACTACATATCGCGTAGATGAA	7	-	748	1071
ENSDARG00000006079	ENSDART00000105888	22	3	3	GAAAAACACTCCTCGCAGCAGCA	5	-	949	1071
ENSDARG00000006079	ENSDART00000105888	22	3	3	CTCCTCGCAGCAGCAGCAGCAGCA	6	-	940	1071
ENSDARG00000006079	ENSDART00000105888	22	3	3	CACAGCAGCACAACCGGCGTCGCT	6	-	882	1071
ENSDARG00000006192	ENSDART00000033103	22	1	1	ACATCCTGCGGGCCGGAGAGGTG	5	+	173	1896
ENSDARG00000006192	ENSDART00000033103	22	1	1	GAAGGCCACCATCAAGGTGGAGGT	6	+	195	1896
ENSDARG00000006192	ENSDART00000033103	22	1	1	GAAGGCCACCATCAAGGTGGAGGTG	7	+	195	1896
ENSDARG00000006192	ENSDART00000033103	22	1	1	GCAGTCAGAAGCGTGCGCTGGAGAG	7	+	38	1896
ENSDARG00000006192	ENSDART00000033103	22	1	1	GCCACCATCAAGGTGGAGGTGCA	5	+	199	1896
ENSDARG00000006192	ENSDART00000033103	22	2	2	GTCAGCTACACTTTTAAGAAGAC	5	+	349	1896
ENSDARG00000006192	ENSDART00000033103	22	2	2	ACCTTCGACACCAGATGATGATGTC	7	+	279	1896
ENSDARG00000006192	ENSDART00000033103	22	3	3	AGCAGCTGCAAGAAGAGCTGCGTCT	7	+	425	1896
ENSDARG00000006192	ENSDART00000033103	22	3	3	ACACACATCATCAAGCAGCTGCA	5	+	412	1896
ENSDARG00000006192	ENSDART00000033103	22	3	3	GTACACACATCATCAAGCAGCTGCA	7	+	410	1896
ENSDARG00000006192	ENSDART00000033103	22	4	4	CTCCACCTCTCGTCCGGGGCAGCA	6	+	542	1896
ENSDARG00000006192	ENSDART00000033103	22	5	5	CTCCTCCTCTGGTTCGAGGTGGAG	6	+	623	1896
ENSDARG00000006192	ENSDART00000033103	22	6	6	TACGGCAGCAGCAGCAGCAGCAGCA	7	+	725	1896
ENSDARG00000006192	ENSDART00000033103	22	7	7	GAAGACCTCTCAGTCTGGTTTGGG	6	+	906	1896
ENSDARG00000006192	ENSDART00000033103	22	7	7	GGCCTCTTCAACTGGTTTGAAGAC	6	+	888	1896
ENSDARG00000006192	ENSDART00000033103	22	7	7	GCCCTCAGCAGCCAATAATGAGTT	6	+	1065	1896
ENSDARG00000006192	ENSDART00000033103	22	7	7	GAAGACCTCTCAGTCTGGTTTGGGC	7	+	906	1896
ENSDARG00000006192	ENSDART00000033103	22	7	7	AGAACCTGCTAGACACGCTGGCTAA	7	+	1121	1896
ENSDARG00000006192	ENSDART00000033103	22	7	7	CTCTCAGTCTGGTTTGGGCAGCA	5	+	912	1896
ENSDARG00000006192	ENSDART00000033103	22	7	7	CCCTCAGCAGCCAATAATGAGTT	5	+	1066	1896
ENSDARG00000006192	ENSDART00000033103	22	8	8	AGCTCCAACCAAAAGAAGGTGCT	5	+	1285	1896
ENSDARG00000006192	ENSDART00000033103	22	8	8	CTCCAACCAAAAGAAGGTGCTGAA	6	+	1287	1896
ENSDARG00000006192	ENSDART00000033103	22	8	8	CACACCAGCCGACTGAAGGCTGC	5	+	1318	1896
ENSDARG00000006192	ENSDART00000033103	22	8	8	GTCAAAGCCCTGCAGCAGGAGCA	5	+	1345	1896
ENSDARG00000006192	ENSDART00000033103	22	8	8	TTCGTCAAAGCCCTGCAGCAGGA	5	+	1342	1896
ENSDARG00000006192	ENSDART00000033103	22	8	8	GTCGCCGCAGTATAAGCAGGTGCG	6	+	1476	1896
ENSDARG00000006192	ENSDART00000033103	22	9	9	TCCCGCACCGTGCAGCAGGTGGT	5	+	1573	1896
ENSDARG00000006192	ENSDART00000033103	22	9	9	GCCACCACCAATACCTGGAGGAAAC	7	+	1732	1896
ENSDARG00000006192	ENSDART00000105422	22	1	1	GTCAGCTACACTTTTAAGAAGAC	5	+	115	1581
ENSDARG00000006192	ENSDART00000105422	22	1	1	ACCTTCGACACCAGATGATGATGTC	7	+	45	1581
ENSDARG00000006192	ENSDART00000105422	22	2	2	AGCAGCTGCAAGAAGAGCTGCGTCT	7	+	191	1581
ENSDARG00000006192	ENSDART00000105422	22	2	2	GTACACACATCATCAAGCAGCTGCA	7	+	176	1581
ENSDARG00000006192	ENSDART00000105422	22	2	2	ACACACATCATCAAGCAGCTGCA	5	+	178	1581
ENSDARG00000006192	ENSDART00000105422	22	3	3	CTCCACCTCTCGTCCGGGGCAGCA	6	+	326	1581
ENSDARG00000006192	ENSDART00000105422	22	4	4	TACGGCAGCAGCAGCAGCAGCAGCA	7	+	410	1581
ENSDARG00000006192	ENSDART00000105422	22	5	5	GGCCTCTTCAACTGGTTTGAAGAC	6	+	657	1581
ENSDARG00000006192	ENSDART00000105422	22	5	5	GCCCTCAGCAGCCAATAATGAGTT	6	+	834	1581
ENSDARG00000006192	ENSDART00000105422	22	5	5	GAAGACCTCTCAGTCTGGTTTGGGC	7	+	675	1581
ENSDARG00000006192	ENSDART00000105422	22	5	5	GAAGACCTCTCAGTCTGGTTTGGG	6	+	675	1581
ENSDARG00000006192	ENSDART00000105422	22	5	5	CTCTCAGTCTGGTTTGGGCAGCA	5	+	681	1581
ENSDARG00000006192	ENSDART00000105422	22	5	5	CCCTCAGCAGCCAATAATGAGTT	5	+	835	1581
ENSDARG00000006192	ENSDART00000105422	22	5	5	AGAACCTGCTAGACACGCTGGCTAA	7	+	890	1581
ENSDARG00000006192	ENSDART00000105422	22	6	6	GTCGCCGCAGTATAAGCAGGTGCG	6	+	1224	1581
ENSDARG00000006192	ENSDART00000105422	22	6	6	TTCGTCAAAGCCCTGCAGCAGGA	5	+	1090	1581
ENSDARG00000006192	ENSDART00000105422	22	6	6	GTCAAAGCCCTGCAGCAGGAGCA	5	+	1093	1581
ENSDARG00000006192	ENSDART00000105422	22	6	6	CTCCAACCAAAAGAAGGTGCTGAA	6	+	1035	1581
ENSDARG00000006192	ENSDART00000105422	22	6	6	CACACCAGCCGACTGAAGGCTGC	5	+	1066	1581
ENSDARG00000006192	ENSDART00000105422	22	6	6	AGCTCCAACCAAAAGAAGGTGCT	5	+	1033	1581
ENSDARG00000006192	ENSDART00000105422	22	7	7	GCCACCACCAATACCTGGAGGAAAC	7	+	1417	1581
ENSDARG00000006192	ENSDART00000105422	22	7	7	TCCCGCACCGTGCAGCAGGTGGT	5	+	1258	1581
ENSDARG00000006192	ENSDART00000105424	22	1	1	CAACAACTCGAAAAAGTTGAAGAG	6	+	48	834
ENSDARG00000006192	ENSDART00000105424	22	1	1	AGCACCAAAAGAGCAGGAATGAGTG	7	+	95	834
ENSDARG00000006192	ENSDART00000105424	22	2	2	GAAGGCCACCATCAAGGTGGAGGTG	7	+	543	834
ENSDARG00000006192	ENSDART00000105424	22	2	2	ACATCCTGCGGGCCGGAGAGGTG	5	+	521	834
ENSDARG00000006192	ENSDART00000105424	22	2	2	GCCACCATCAAGGTGGAGGTGCA	5	+	547	834
ENSDARG00000006192	ENSDART00000105424	22	2	2	GAAGGCCACCATCAAGGTGGAGGT	6	+	543	834
ENSDARG00000006192	ENSDART00000105424	22	2	2	GCAGTCAGAAGCGTGCGCTGGAGAG	7	+	386	834
ENSDARG00000006192	ENSDART00000105424	22	3	3	GTCAGCTACACTTTTAAGAAGAC	5	+	697	834
ENSDARG00000006192	ENSDART00000105424	22	3	3	ACCTTCGACACCAGATGATGATGTC	7	+	627	834
ENSDARG00000006192	ENSDART00000105424	22	4	4	ACACACATCATCAAGCAGCTGCA	5	+	760	834
ENSDARG00000006192	ENSDART00000105424	22	4	4	GTACACACATCATCAAGCAGCTGCA	7	+	758	834
ENSDARG00000006192	ENSDART00000105424	22	4	4	AGCAGCTGCAAGAAGAGCTGCGTCT	7	+	773	834
ENSDARG00000006266	ENSDART00000005720	22	8	7	TTAGTCAGATGTCCGAGGTGTTG	5	+	653	2247
ENSDARG00000006266	ENSDART00000005720	22	8	7	TTAGTCAGATGTCCGAGGTGTTGAA	7	+	653	2247
ENSDARG00000006266	ENSDART00000005720	22	9	8	TGCAGCAAAATCTCTCTGGAGGA	5	+	898	2247
ENSDARG00000006266	ENSDART00000005720	22	10	9	GTTTTCAGCTCTTTGGTAGTGGAG	6	+	949	2247
ENSDARG00000006266	ENSDART00000005720	22	11	10	TTAACCACACTGTTCGGGTGAAGGT	7	+	1073	2247
ENSDARG00000006266	ENSDART00000005720	22	15	14	CACTCCATCACCTTTGAGGCTGAG	6	+	1291	2247
ENSDARG00000006266	ENSDART00000005720	22	15	14	CTCCACTCCATCACCTTTGAGGCT	6	+	1288	2247
ENSDARG00000006266	ENSDART00000005720	22	15	14	TCCATCACCTTTGAGGCTGAGCT	5	+	1294	2247
ENSDARG00000006266	ENSDART00000005720	22	16	15	GTCAGCTGCCCAGTGGATGGGCG	5	+	1385	2247
ENSDARG00000006266	ENSDART00000005720	22	17	16	GTCAGCTACAGGAAGTGCTGAGCT	6	+	1487	2247
ENSDARG00000006266	ENSDART00000005720	22	20	19	CAACAAAGCTCCAGGGACGTTTCT	6	+	1779	2247
ENSDARG00000006266	ENSDART00000005720	22	21	20	AGATTCCCAAAGACGATGCCTTC	5	+	2009	2247
ENSDARG00000006266	ENSDART00000005720	22	21	20	AACTACCGCGTAATGGCGGCCGAC	6	+	1948	2247
ENSDARG00000006266	ENSDART00000105764	22	7	7	TTAGTCAGATGTCCGAGGTGTTGAA	7	+	653	1572
ENSDARG00000006266	ENSDART00000105764	22	7	7	TTAGTCAGATGTCCGAGGTGTTG	5	+	653	1572
ENSDARG00000006266	ENSDART00000105764	22	8	8	TGCAGCAAAATCTCTCTGGAGGA	5	+	898	1572
ENSDARG00000006266	ENSDART00000105764	22	9	9	GTTTTCAGCTCTTTGGTAGTGGAG	6	+	949	1572
ENSDARG00000006266	ENSDART00000105764	22	10	10	TTAACCACACTGTTCGGGTGAAGGT	7	+	1073	1572
ENSDARG00000006266	ENSDART00000105764	22	12	12	GTCAGCTGCCCAGTGGATGGGCG	5	+	1235	1572
ENSDARG00000006266	ENSDART00000105764	22	13	13	GTCAGCTACAGGAAGTGCTGAGCT	6	+	1337	1572
ENSDARG00000006266	ENSDART00000105765	22	7	7	TTAGTCAGATGTCCGAGGTGTTGAA	7	+	641	1974
ENSDARG00000006266	ENSDART00000105765	22	7	7	TTAGTCAGATGTCCGAGGTGTTG	5	+	641	1974
ENSDARG00000006266	ENSDART00000105765	22	8	8	TGCAGCAAAATCTCTCTGGAGGA	5	+	886	1974
ENSDARG00000006266	ENSDART00000105765	22	9	9	GTTTTCAGCTCTTTGGTAGTGGAG	6	+	937	1974
ENSDARG00000006266	ENSDART00000105765	22	10	10	TTAACCACACTGTTCGGGTGAAGGT	7	+	1061	1974
ENSDARG00000006266	ENSDART00000105765	22	12	12	CTCCACTCCATCACCTTTGAGGCT	6	+	1210	1974
ENSDARG00000006266	ENSDART00000105765	22	12	12	CACTCCATCACCTTTGAGGCTGAG	6	+	1213	1974
ENSDARG00000006266	ENSDART00000105765	22	12	12	TCCATCACCTTTGAGGCTGAGCT	5	+	1216	1974
ENSDARG00000006266	ENSDART00000105765	22	13	13	GTCAGCTGCCCAGTGGATGGGCG	5	+	1307	1974
ENSDARG00000006266	ENSDART00000105765	22	14	14	GTCAGCTACAGGAAGTGCTGAGCT	6	+	1409	1974
ENSDARG00000006266	ENSDART00000105765	22	17	17	CAACAAAGCTCCAGGGACGTTTCT	6	+	1701	1974
ENSDARG00000006266	ENSDART00000105765	22	18	18	AGATTCCCAAAGACGATGCCTTC	5	+	1931	1974
ENSDARG00000006266	ENSDART00000105765	22	18	18	AACTACCGCGTAATGGCGGCCGAC	6	+	1870	1974
ENSDARG00000006368	ENSDART00000007321	22	2	2	AACACCAAAGATCTGAGCTGCAGAT	7	+	334	1110
ENSDARG00000006368	ENSDART00000007321	22	3	3	AGACTACACGGGACAGTCGTATAC	6	+	450	1110
ENSDARG00000006368	ENSDART00000007321	22	5	5	GGCATCTACGGTTCGAAGAAGGC	5	+	841	1110
ENSDARG00000006368	ENSDART00000007321	22	5	5	CGCATCAACTCCTGGCATTGGTG	5	+	897	1110
ENSDARG00000006609	ENSDART00000010048	22	1	1	ACAGTCAACCAACATTGATGCAGCA	7	+	63	1191
ENSDARG00000006609	ENSDART00000010048	22	3	3	GGCGCCTTCTACAGTGATGGAGAA	6	+	403	1191
ENSDARG00000006609	ENSDART00000010048	22	5	5	GTACTCAGAGGTTTGGCGTATCT	5	+	529	1191
ENSDARG00000006609	ENSDART00000010048	22	7	7	GCACTACTCGGTTCAGTCGGATGT	6	+	726	1191
ENSDARG00000006609	ENSDART00000010048	22	9	9	TTCACCACAGACTTTGAGGAGTTT	6	+	1012	1191
ENSDARG00000006609	ENSDART00000010048	22	9	9	GTCTTCACCACAGACTTTGAGGAG	6	+	1009	1191
ENSDARG00000006609	ENSDART00000010048	22	9	9	GGCGTCTTCACCACAGACTTTGAG	6	+	1006	1191
ENSDARG00000006609	ENSDART00000010048	22	9	9	CACCACAGACTTTGAGGAGTTTGTG	7	+	1014	1191
ENSDARG00000006609	ENSDART00000010048	22	9	9	CACCACAGACTTTGAGGAGTTTGT	6	+	1014	1191
ENSDARG00000006609	ENSDART00000074624	22	1	1	ACAGTCAACCAACATTGATGCAGCA	7	+	63	855
ENSDARG00000006609	ENSDART00000074624	22	3	3	GGCGCCTTCTACAGTGATGGAGAA	6	+	403	855
ENSDARG00000006609	ENSDART00000074624	22	5	5	GTACTCAGAGGTTTGGCGTATCT	5	+	529	855
ENSDARG00000006609	ENSDART00000074624	22	7	7	GCACTACTCGGTTCAGTCGGATGT	6	+	726	855
ENSDARG00000007067	ENSDART00000009590	22	1	1	ATCAAATACAGAGAATCTGTTGGT	6	-	103	537
ENSDARG00000007081	ENSDART00000009601	22	2	2	CCCCACCTCCTGCAGCCGAAGTC	5	+	341	1521
ENSDARG00000007081	ENSDART00000009601	22	2	2	CAAAGCCTCAGCCTGGCTGGCTGC	6	+	216	1521
ENSDARG00000007081	ENSDART00000009601	22	2	2	AGCCCCACCTCCTGCAGCCGAAGTC	7	+	339	1521
ENSDARG00000007081	ENSDART00000009601	22	2	2	TCCCTCAGAATATGGTGAAGAGTTT	7	+	35	1521
ENSDARG00000007081	ENSDART00000009601	22	2	2	ACCAGCCCCACCTCCTGCAGCCGAA	7	+	336	1521
ENSDARG00000007081	ENSDART00000009601	22	6	6	TCCCTCTAATAAACCGGGTGTGGAG	7	+	651	1521
ENSDARG00000007081	ENSDART00000009601	22	7	7	CTCTTCAACCAGCTGAAGCATTG	5	+	820	1521
ENSDARG00000007081	ENSDART00000009601	22	8	8	TGCCACTACAGGACTGCGAGTGT	5	+	915	1521
ENSDARG00000007081	ENSDART00000009601	22	9	9	TGCGCCCACCTGCAATGTTTTGAC	6	+	994	1521
ENSDARG00000007081	ENSDART00000009601	22	9	9	GACAAACCAGCTCCTTTTGAGCT	5	+	1075	1521
ENSDARG00000007081	ENSDART00000009601	22	9	9	CCCACCTGCAATGTTTTGACGCA	5	+	998	1521
ENSDARG00000007081	ENSDART00000009601	22	9	9	AGCTCCTTACTATCGACGGGTAA	5	+	1094	1521
ENSDARG00000007081	ENSDART00000009601	22	10	10	AGAGACACCAGAGGATGTAGAGGAG	7	+	1134	1521
ENSDARG00000007081	ENSDART00000009601	22	11	11	CTCGTCAGAGGAAGAAGGAGGCGGA	7	+	1410	1521
ENSDARG00000007081	ENSDART00000009601	22	11	11	CCCCGCTCCTAAACGGGGCAGAT	5	+	1476	1521
ENSDARG00000007081	ENSDART00000009601	22	11	11	ACCGGCAGCACCAGTGGGGGGTC	5	+	1351	1521
ENSDARG00000007081	ENSDART00000105520	22	2	2	CCCCACCTCCTGCAGCCGAAGTC	5	+	335	1515
ENSDARG00000007081	ENSDART00000105520	22	2	2	CAAAGCCTCAGCCTGGCTGGCTGC	6	+	210	1515
ENSDARG00000007081	ENSDART00000105520	22	2	2	AGCCCCACCTCCTGCAGCCGAAGTC	7	+	333	1515
ENSDARG00000007081	ENSDART00000105520	22	2	2	TCCCTCAGAATATGGTGAAGAGTTT	7	+	29	1515
ENSDARG00000007081	ENSDART00000105520	22	2	2	ACCAGCCCCACCTCCTGCAGCCGAA	7	+	330	1515
ENSDARG00000007081	ENSDART00000105520	22	6	6	TCCCTCTAATAAACCGGGTGTGGAG	7	+	645	1515
ENSDARG00000007081	ENSDART00000105520	22	7	7	CTCTTCAACCAGCTGAAGCATTG	5	+	814	1515
ENSDARG00000007081	ENSDART00000105520	22	8	8	TGCCACTACAGGACTGCGAGTGT	5	+	909	1515
ENSDARG00000007081	ENSDART00000105520	22	9	9	TGCGCCCACCTGCAATGTTTTGAC	6	+	988	1515
ENSDARG00000007081	ENSDART00000105520	22	9	9	CCCACCTGCAATGTTTTGACGCA	5	+	992	1515
ENSDARG00000007081	ENSDART00000105520	22	9	9	GACAAACCAGCTCCTTTTGAGCT	5	+	1069	1515
ENSDARG00000007081	ENSDART00000105520	22	9	9	AGCTCCTTACTATCGACGGGTAA	5	+	1088	1515
ENSDARG00000007081	ENSDART00000105520	22	10	10	AGAGACACCAGAGGATGTAGAGGAG	7	+	1128	1515
ENSDARG00000007081	ENSDART00000105520	22	11	11	ACCGGCAGCACCAGTGGGGGGTC	5	+	1345	1515
ENSDARG00000007081	ENSDART00000105520	22	11	11	CTCGTCAGAGGAAGAAGGAGGCGGA	7	+	1404	1515
ENSDARG00000007081	ENSDART00000105520	22	11	11	CCCCGCTCCTAAACGGGGCAGAT	5	+	1470	1515
ENSDARG00000007165	ENSDART00000066115	22	5	5	GTTCAATTCTCTCAGGTGTGATGAG	7	-	252	1035
ENSDARG00000007165	ENSDART00000066115	22	8	8	TTCTCCAGCTTGAATTGTGCCTTC	6	-	681	1035
ENSDARG00000007165	ENSDART00000066115	22	9	9	TTCTCCAGCTTGAACTGTGTCTTC	6	-	855	1035
ENSDARG00000007165	ENSDART00000066115	22	10	10	AGAAACATCTGTGATGCCGCAGTT	6	-	892	1035
ENSDARG00000007165	ENSDART00000066115	22	10	10	AGAAACCGCAGAGCTTTTGTGTTC	6	-	936	1035
ENSDARG00000007165	ENSDART00000066115	22	10	10	GAAACCGCAGAGCTTTTGTGTTC	5	-	936	1035
ENSDARG00000007165	ENSDART00000105959	22	4	4	AGATTCTTCAGACTGCTGGAGTC	5	-	565	978
ENSDARG00000007165	ENSDART00000105960	22	5	5	TTCTCCAGCTTGAATTGTGCCTTC	6	-	492	678
ENSDARG00000007165	ENSDART00000105960	22	6	6	TTCTCCAGCTTGAACTGTGTCTTC	6	-	666	678
ENSDARG00000007165	ENSDART00000105961	22	2	2	AAATACTCCTTAAATAGTTGACTTT	7	-	139	783
ENSDARG00000007165	ENSDART00000105961	22	7	7	TTCTCCAGCTTGAATTGTGCCTTC	6	-	537	783
ENSDARG00000007165	ENSDART00000105961	22	8	8	TTCTCCAGCTTGAACTGTGTCTTC	6	-	711	783
ENSDARG00000007165	ENSDART00000105962	22	3	3	TTCTCCAGCTTGAATTGTGCCTTC	6	-	327	618
ENSDARG00000007165	ENSDART00000105962	22	4	4	TTCTCCAGCTTGAACTGTGTCTTC	6	-	501	618
ENSDARG00000007165	ENSDART00000105963	22	2	2	TGCAAAACATCATATTTGTTTTT	5	-	106	747
ENSDARG00000007165	ENSDART00000105963	22	4	4	TTCTCCAGCTTGAATTGTGCCTTC	6	-	504	747
ENSDARG00000007165	ENSDART00000105963	22	5	5	TTCTCCAGCTTGAACTGTGTCTTC	6	-	678	747
ENSDARG00000007165	ENSDART00000105963	22	6	6	AGAAACATCTGTGATGCCGCAGTT	6	-	715	747
ENSDARG00000007250	ENSDART00000006927	22	1	1	TTAATCTCCAGTCTGGACGTGGCC	6	-	21	783
ENSDARG00000007250	ENSDART00000006927	22	3	3	GAAATCCACTTTACGGTTGTAGTC	6	-	196	783
ENSDARG00000007250	ENSDART00000006927	22	4	4	CTCTCCAGCACATCTGGCTTTGCT	6	-	355	783
ENSDARG00000007250	ENSDART00000006927	22	4	4	AAAGACTTCTCAGCTGGAGACGGC	6	-	249	783
ENSDARG00000007250	ENSDART00000006927	22	6	6	GAAACCTACTTCCTGTGTCGGAGGT	7	-	434	783
ENSDARG00000007250	ENSDART00000006927	22	7	7	TTCTCCTGCAGGTTGTGATGATGCT	7	-	503	783
ENSDARG00000007265	ENSDART00000007901	22	5	5	TACAAAAGCCTCCTGGAGACGAT	5	+	397	438
ENSDARG00000007265	ENSDART00000007901	22	5	5	ACAAAAGCCTCCTGGAGACGATTGC	7	+	398	438
ENSDARG00000007265	ENSDART00000007901	22	5	5	AACTGCACAATGTTTCGACGAGGCT	7	+	309	438
ENSDARG00000007265	ENSDART00000007901	22	5	5	AAAAGCCTCCTGGAGACGATTGC	5	+	400	438
ENSDARG00000007421	ENSDART00000044683	22	2	2	CTCTGCCACCGAGGGCTGCAGTT	5	+	117	1647
ENSDARG00000007421	ENSDART00000044683	22	2	2	TCCCACGACTGTAATCGAGGGGGCT	7	+	198	1647
ENSDARG00000007421	ENSDART00000044683	22	3	3	AACGTCACCATGGAGGAGTGTGT	5	+	328	1647
ENSDARG00000007421	ENSDART00000044683	22	3	3	AACATCCTCGGACAGGTGCGATGGA	7	+	278	1647
ENSDARG00000007421	ENSDART00000044683	22	5	5	CGCCTATAACGTGAATCTGCTGAG	6	+	585	1647
ENSDARG00000007421	ENSDART00000044683	22	5	5	GACATCAGAGAACAGGGCCGCAGTA	7	+	640	1647
ENSDARG00000007421	ENSDART00000044683	22	6	6	GTCCACTAATATCCTGGACTTTGAG	7	+	738	1647
ENSDARG00000007421	ENSDART00000044683	22	9	9	GTTCAAAACAATCAGGACGATGGC	6	+	1012	1647
ENSDARG00000007421	ENSDART00000044683	22	9	9	TTCAAAACAATCAGGACGATGGC	5	+	1013	1647
ENSDARG00000007421	ENSDART00000044683	22	9	9	AACAGCGGCTCCTGGTGGGGGGTCT	7	+	1086	1647
ENSDARG00000007421	ENSDART00000044683	22	9	9	AACAGCGGCTCCTGGTGGGGGGTC	6	+	1086	1647
ENSDARG00000007421	ENSDART00000044683	22	9	9	AACAGCGGCTCCTGGTGGGGGGT	5	+	1086	1647
ENSDARG00000007421	ENSDART00000044683	22	14	14	AACGCCAACATAGCGCTGGAGAC	5	+	1618	1647
ENSDARG00000007905	ENSDART00000078766	22	1	1	TGCTCCTGCTGGTTTCTCTGGTGCC	7	+	50	732
ENSDARG00000007905	ENSDART00000078766	22	2	2	CGCTGCACATTGCCGAATGGGGT	5	+	216	732
ENSDARG00000007905	ENSDART00000078766	22	4	4	AGATTCAGCTTGTGCAGTCGCTGGA	7	+	453	732
ENSDARG00000007905	ENSDART00000078766	22	4	4	CAAGCCAGATTCAGCTTGTGCAGTC	7	+	447	732
ENSDARG00000007905	ENSDART00000078766	22	4	4	GCACACAGCTCATGGAAGCAGGT	5	+	509	732
ENSDARG00000007905	ENSDART00000078766	22	4	4	ACCTTCACAGATGATCTGCGTCT	5	+	585	732
ENSDARG00000008049	ENSDART00000013933	22	1	1	CGCGACAAAGTTAGCAGCAGTAGAG	7	-	33	459
ENSDARG00000008049	ENSDART00000013933	22	1	1	TTCCAAAGAGAACCTGAATTGTTG	6	-	100	459
ENSDARG00000008306	ENSDART00000002348	22	3	2	ACCCAATGCATATGTGCTGGGAC	5	-	29	978
ENSDARG00000008306	ENSDART00000002348	22	4	3	CAACCCGTCCACGGGCCTTTTTC	5	-	489	978
ENSDARG00000008306	ENSDART00000002348	22	4	3	ACACCAGTCATGTTGACTTTGAG	5	-	433	978
ENSDARG00000008306	ENSDART00000002348	22	6	5	GGCATCCCAGCCAGCGCTGTAGCG	6	-	874	978
ENSDARG00000008306	ENSDART00000002348	22	6	5	TTAAACACCTTTTGCTGGTTTTGGC	7	-	966	978
ENSDARG00000008735	ENSDART00000016873	22	4	4	GTCAGCAAACAGCGTGTGAATTG	5	-	413	1119
ENSDARG00000008735	ENSDART00000016873	22	5	5	GTTTACCTCATTGTTGCGGCTGAG	6	-	595	1119
ENSDARG00000008735	ENSDART00000016873	22	5	5	GACGTCCACGAATCTGCTGCAGAG	6	-	527	1119
ENSDARG00000008735	ENSDART00000016873	22	5	5	ACAGACGTCCACGAATCTGCTGCA	6	-	530	1119
ENSDARG00000008735	ENSDART00000016873	22	8	8	CACGACTTCTACAACCGCATTGTTT	7	-	846	1119
ENSDARG00000008767	ENSDART00000008020	22	6	6	CTCAACGCCATCATAGGGGTGAGTG	7	+	361	2313
ENSDARG00000008767	ENSDART00000008020	22	8	8	CTCCTCATCCTTCAGGTCTGTCTCT	7	+	461	2313
ENSDARG00000008767	ENSDART00000008020	22	8	8	TCCTCATCCTTCAGGTCTGTCTCT	6	+	462	2313
ENSDARG00000008767	ENSDART00000008020	22	10	10	TTATTCCTCTCAGGCCGGTGGTGAT	7	+	660	2313
ENSDARG00000008767	ENSDART00000008020	22	13	13	CTCGGCAGACCCTCTGGGTGAGAC	6	+	1080	2313
ENSDARG00000008767	ENSDART00000008020	22	14	14	TTACCCAGCTCACTTTGGGGTGGTG	7	+	1131	2313
ENSDARG00000008767	ENSDART00000008020	22	14	14	TTACCCAGCTCACTTTGGGGTGGT	6	+	1131	2313
ENSDARG00000008767	ENSDART00000008020	22	14	14	CTCGCCCCAAATCAGTGCTGCAGCC	7	+	1218	2313
ENSDARG00000008767	ENSDART00000008020	22	14	14	CGCCCCAAATCAGTGCTGCAGCC	5	+	1220	2313
ENSDARG00000008767	ENSDART00000008020	22	17	17	CTCCACGCATCAAGGCAGAATTG	5	+	1700	2313
ENSDARG00000008767	ENSDART00000008020	22	17	17	TTCTCCTGCTGCAGTGACGGAAAC	6	+	1780	2313
ENSDARG00000008767	ENSDART00000008020	22	18	18	TTCCAAGGCCACACAGATGGAGCC	6	+	1846	2313
ENSDARG00000008767	ENSDART00000008020	22	19	19	TACACCTTCATGAAAGCTGCGTTC	6	+	2093	2313
ENSDARG00000008767	ENSDART00000008020	22	21	21	GAAAGCCACGGTGTATGAGGTGGTG	7	+	2295	2313
ENSDARG00000008767	ENSDART00000062322	22	6	6	CTCAACGCCATCATAGGGGTGAGTG	7	+	361	2331
ENSDARG00000008767	ENSDART00000062322	22	8	8	CTCCTCATCCTTCAGGTCTGTCTCT	7	+	470	2331
ENSDARG00000008767	ENSDART00000062322	22	8	8	TCCTCATCCTTCAGGTCTGTCTCT	6	+	471	2331
ENSDARG00000008767	ENSDART00000062322	22	10	10	TTATTCCTCTCAGGCCGGTGGTGAT	7	+	678	2331
ENSDARG00000008767	ENSDART00000062322	22	13	13	CTCGGCAGACCCTCTGGGTGAGAC	6	+	1098	2331
ENSDARG00000008767	ENSDART00000062322	22	14	14	TTACCCAGCTCACTTTGGGGTGGTG	7	+	1149	2331
ENSDARG00000008767	ENSDART00000062322	22	14	14	TTACCCAGCTCACTTTGGGGTGGT	6	+	1149	2331
ENSDARG00000008767	ENSDART00000062322	22	14	14	CTCGCCCCAAATCAGTGCTGCAGCC	7	+	1236	2331
ENSDARG00000008767	ENSDART00000062322	22	14	14	CGCCCCAAATCAGTGCTGCAGCC	5	+	1238	2331
ENSDARG00000008767	ENSDART00000062322	22	17	17	TTCTCCTGCTGCAGTGACGGAAAC	6	+	1798	2331
ENSDARG00000008767	ENSDART00000062322	22	17	17	CTCCACGCATCAAGGCAGAATTG	5	+	1718	2331
ENSDARG00000008767	ENSDART00000062322	22	18	18	TTCCAAGGCCACACAGATGGAGCC	6	+	1864	2331
ENSDARG00000008767	ENSDART00000062322	22	19	19	TACACCTTCATGAAAGCTGCGTTC	6	+	2111	2331
ENSDARG00000008767	ENSDART00000062322	22	21	21	GAAAGCCACGGTGTATGAGGTGGTG	7	+	2313	2331
ENSDARG00000008767	ENSDART00000105559	22	5	5	CTCAACGCCATCATAGGGGTGAGTG	7	+	319	2271
ENSDARG00000008767	ENSDART00000105559	22	8	8	TCCTCATCCTTCAGGTCTGTCTCT	6	+	420	2271
ENSDARG00000008767	ENSDART00000105559	22	8	8	CTCCTCATCCTTCAGGTCTGTCTCT	7	+	419	2271
ENSDARG00000008767	ENSDART00000105559	22	10	10	TTATTCCTCTCAGGCCGGTGGTGAT	7	+	621	2271
ENSDARG00000008767	ENSDART00000105559	22	13	13	CTCGGCAGACCCTCTGGGTGAGAC	6	+	1041	2271
ENSDARG00000008767	ENSDART00000105559	22	14	14	CTCGCCCCAAATCAGTGCTGCAGCC	7	+	1179	2271
ENSDARG00000008767	ENSDART00000105559	22	14	14	CGCCCCAAATCAGTGCTGCAGCC	5	+	1181	2271
ENSDARG00000008767	ENSDART00000105559	22	14	14	TTACCCAGCTCACTTTGGGGTGGT	6	+	1092	2271
ENSDARG00000008767	ENSDART00000105559	22	14	14	TTACCCAGCTCACTTTGGGGTGGTG	7	+	1092	2271
ENSDARG00000008767	ENSDART00000105559	22	17	17	TTCTCCTGCTGCAGTGACGGAAAC	6	+	1741	2271
ENSDARG00000008767	ENSDART00000105559	22	17	17	CTCCACGCATCAAGGCAGAATTG	5	+	1661	2271
ENSDARG00000008767	ENSDART00000105559	22	18	18	TTCCAAGGCCACACAGATGGAGCC	6	+	1807	2271
ENSDARG00000008767	ENSDART00000105559	22	19	19	TACACCTTCATGAAAGCTGCGTTC	6	+	2054	2271
ENSDARG00000008767	ENSDART00000105559	22	21	21	GAAAGCCACGGTGTATGAGGTGGTG	7	+	2256	2271
ENSDARG00000008767	ENSDART00000105560	22	5	5	CTCAACGCCATCATAGGGGTGAGTG	7	+	367	2304
ENSDARG00000008767	ENSDART00000105560	22	6	6	TCCTCATCCTTCAGGTCTGTCTCT	6	+	435	2304
ENSDARG00000008767	ENSDART00000105560	22	6	6	CTCCTCATCCTTCAGGTCTGTCTCT	7	+	434	2304
ENSDARG00000008767	ENSDART00000105560	22	8	8	TTATTCCTCTCAGGCCGGTGGTGAT	7	+	642	2304
ENSDARG00000008767	ENSDART00000105560	22	11	11	CTCGGCAGACCCTCTGGGTGAGAC	6	+	1056	2304
ENSDARG00000008767	ENSDART00000105560	22	12	12	CTCGCCCCAAATCAGTGCTGCAGCC	7	+	1194	2304
ENSDARG00000008767	ENSDART00000105560	22	12	12	CGCCCCAAATCAGTGCTGCAGCC	5	+	1196	2304
ENSDARG00000008767	ENSDART00000105560	22	12	12	TTACCCAGCTCACTTTGGGGTGGT	6	+	1107	2304
ENSDARG00000008767	ENSDART00000105560	22	12	12	TTACCCAGCTCACTTTGGGGTGGTG	7	+	1107	2304
ENSDARG00000008767	ENSDART00000105560	22	15	15	CTCCACGCATCAAGGCAGAATTG	5	+	1691	2304
ENSDARG00000008767	ENSDART00000105560	22	15	15	TTCTCCTGCTGCAGTGACGGAAAC	6	+	1771	2304
ENSDARG00000008767	ENSDART00000105560	22	16	16	TTCCAAGGCCACACAGATGGAGCC	6	+	1837	2304
ENSDARG00000008767	ENSDART00000105560	22	17	17	TACACCTTCATGAAAGCTGCGTTC	6	+	2084	2304
ENSDARG00000008767	ENSDART00000105560	22	19	19	GAAAGCCACGGTGTATGAGGTGGTG	7	+	2286	2304
ENSDARG00000008767	ENSDART00000105561	22	5	5	CTCAACGCCATCATAGGGGTGAGTG	7	+	367	2310
ENSDARG00000008767	ENSDART00000105561	22	6	6	TCCTCATCCTTCAGGTCTGTCTCT	6	+	435	2310
ENSDARG00000008767	ENSDART00000105561	22	6	6	CTCCTCATCCTTCAGGTCTGTCTCT	7	+	434	2310
ENSDARG00000008767	ENSDART00000105561	22	8	8	TTATTCCTCTCAGGCCGGTGGTGAT	7	+	642	2310
ENSDARG00000008767	ENSDART00000105561	22	11	11	CTCGGCAGACCCTCTGGGTGAGAC	6	+	1062	2310
ENSDARG00000008767	ENSDART00000105561	22	12	12	CGCCCCAAATCAGTGCTGCAGCC	5	+	1202	2310
ENSDARG00000008767	ENSDART00000105561	22	12	12	TTACCCAGCTCACTTTGGGGTGGTG	7	+	1113	2310
ENSDARG00000008767	ENSDART00000105561	22	12	12	TTACCCAGCTCACTTTGGGGTGGT	6	+	1113	2310
ENSDARG00000008767	ENSDART00000105561	22	12	12	CTCGCCCCAAATCAGTGCTGCAGCC	7	+	1200	2310
ENSDARG00000008767	ENSDART00000105561	22	15	15	CTCCACGCATCAAGGCAGAATTG	5	+	1697	2310
ENSDARG00000008767	ENSDART00000105561	22	15	15	TTCTCCTGCTGCAGTGACGGAAAC	6	+	1777	2310
ENSDARG00000008767	ENSDART00000105561	22	16	16	TTCCAAGGCCACACAGATGGAGCC	6	+	1843	2310
ENSDARG00000008767	ENSDART00000105561	22	17	17	TACACCTTCATGAAAGCTGCGTTC	6	+	2090	2310
ENSDARG00000008767	ENSDART00000105561	22	19	19	GAAAGCCACGGTGTATGAGGTGGTG	7	+	2292	2310
ENSDARG00000009477	ENSDART00000004331	22	1	1	TCCAGCGTCGAGGAGGAGGAGAA	5	+	217	1266
ENSDARG00000009477	ENSDART00000004331	22	1	1	GTTTCACGCTGGAGGTGCTGCGGCG	7	+	53	1266
ENSDARG00000009477	ENSDART00000004331	22	1	1	GCAGCCCGCGGACCTGCTGGAGTT	6	+	78	1266
ENSDARG00000009477	ENSDART00000004331	22	1	1	GACTCCAGCGTCGAGGAGGAGGA	5	+	214	1266
ENSDARG00000009477	ENSDART00000004331	22	1	1	CACACCGACTCCAGCGTCGAGGAG	6	+	208	1266
ENSDARG00000009477	ENSDART00000004331	22	1	1	AGCCCAGCATGAGCGTGCCGGTGCC	7	+	2	1266
ENSDARG00000009477	ENSDART00000004331	22	1	1	GACTCCAGCGTCGAGGAGGAGGAG	6	+	214	1266
ENSDARG00000009477	ENSDART00000004331	22	1	1	ACCGACTCCAGCGTCGAGGAGGAG	6	+	211	1266
ENSDARG00000009477	ENSDART00000004331	22	3	3	TGCTGCACCAGAAGACGGATGAGCA	7	+	428	1266
ENSDARG00000009477	ENSDART00000004331	22	3	3	ACCCTATAACCCTGATGAGGATGAT	7	+	372	1266
ENSDARG00000009477	ENSDART00000004331	22	3	3	GGCAGCGGCTGCAGGACGCCTGC	5	+	455	1266
ENSDARG00000009477	ENSDART00000004331	22	4	4	TTCTACGTCATCGAGAGGTGAGGCC	7	+	601	1266
ENSDARG00000009477	ENSDART00000004331	22	4	4	TGCATCATCAATCAGGGTGACGAC	6	+	568	1266
ENSDARG00000009477	ENSDART00000004331	22	4	4	TTAGACAGCATGTTTGAGGTGTTG	6	+	529	1266
ENSDARG00000009477	ENSDART00000004331	22	6	6	TGCCGCTGCTGAAGTCTCTGCAGGT	7	+	851	1266
ENSDARG00000009477	ENSDART00000004331	22	8	8	GACTGCTTCTACATCGTGGAGTCT	6	+	961	1266
ENSDARG00000009477	ENSDART00000004331	22	8	8	TTCTACATCGTGGAGTCTGGAGAG	6	+	967	1266
ENSDARG00000009477	ENSDART00000004331	22	9	9	AGCTCCTGCAGGAGGAGGTGGAG	5	+	1028	1266
ENSDARG00000009477	ENSDART00000004331	22	9	9	AGCTCCTGCAGGAGGAGGTGGAGGT	7	+	1028	1266
ENSDARG00000009477	ENSDART00000004331	22	9	9	GTCAGCTCCTGCAGGAGGAGGTGGA	7	+	1025	1266
ENSDARG00000009477	ENSDART00000004331	22	9	9	GTCAGCTCCTGCAGGAGGAGGTG	5	+	1025	1266
ENSDARG00000009477	ENSDART00000004331	22	9	9	AGCTGCATCTGTGTATGCTGTTGGA	7	+	1113	1266
ENSDARG00000009477	ENSDART00000004331	22	10	10	ACATCACACACTACGAGCAGCAGCT	7	+	1214	1266
ENSDARG00000009477	ENSDART00000004331	22	10	10	AGCAGCAGCTGGTGGCGGTGTTC	5	+	1229	1266
ENSDARG00000009477	ENSDART00000004331	22	10	10	ACACACTACGAGCAGCAGCTGGT	5	+	1219	1266
ENSDARG00000009477	ENSDART00000105879	22	1	1	TCCAGCGTCGAGGAGGAGGAGAA	5	+	217	1179
ENSDARG00000009477	ENSDART00000105879	22	1	1	GTTTCACGCTGGAGGTGCTGCGGCG	7	+	53	1179
ENSDARG00000009477	ENSDART00000105879	22	1	1	GCAGCCCGCGGACCTGCTGGAGTT	6	+	78	1179
ENSDARG00000009477	ENSDART00000105879	22	1	1	GACTCCAGCGTCGAGGAGGAGGAG	6	+	214	1179
ENSDARG00000009477	ENSDART00000105879	22	1	1	GACTCCAGCGTCGAGGAGGAGGA	5	+	214	1179
ENSDARG00000009477	ENSDART00000105879	22	1	1	CACACCGACTCCAGCGTCGAGGAG	6	+	208	1179
ENSDARG00000009477	ENSDART00000105879	22	1	1	ACCGACTCCAGCGTCGAGGAGGAG	6	+	211	1179
ENSDARG00000009477	ENSDART00000105879	22	1	1	AGCCCAGCATGAGCGTGCCGGTGCC	7	+	2	1179
ENSDARG00000009477	ENSDART00000105879	22	3	3	GGCAGCGGCTGCAGGACGCCTGC	5	+	392	1179
ENSDARG00000009477	ENSDART00000105879	22	3	3	ACCCTATAACCCTGATGAGGATGAT	7	+	309	1179
ENSDARG00000009477	ENSDART00000105879	22	3	3	TGCTGCACCAGAAGACGGATGAGCA	7	+	365	1179
ENSDARG00000009477	ENSDART00000105879	22	4	4	TTCTACGTCATCGAGAGGTGAGGCC	7	+	538	1179
ENSDARG00000009477	ENSDART00000105879	22	4	4	TTAGACAGCATGTTTGAGGTGTTG	6	+	466	1179
ENSDARG00000009477	ENSDART00000105879	22	4	4	TGCATCATCAATCAGGGTGACGAC	6	+	505	1179
ENSDARG00000009477	ENSDART00000105879	22	8	8	TTCTACATCGTGGAGTCTGGAGAG	6	+	880	1179
ENSDARG00000009477	ENSDART00000105879	22	8	8	GACTGCTTCTACATCGTGGAGTCT	6	+	874	1179
ENSDARG00000009477	ENSDART00000105879	22	9	9	GTCAGCTCCTGCAGGAGGAGGTGGA	7	+	938	1179
ENSDARG00000009477	ENSDART00000105879	22	9	9	AGCTCCTGCAGGAGGAGGTGGAGGT	7	+	941	1179
ENSDARG00000009477	ENSDART00000105879	22	9	9	AGCTGCATCTGTGTATGCTGTTGGA	7	+	1026	1179
ENSDARG00000009477	ENSDART00000105879	22	9	9	AGCTCCTGCAGGAGGAGGTGGAG	5	+	941	1179
ENSDARG00000009477	ENSDART00000105879	22	9	9	GTCAGCTCCTGCAGGAGGAGGTG	5	+	938	1179
ENSDARG00000009477	ENSDART00000105879	22	10	10	AGCAGCAGCTGGTGGCGGTGTTC	5	+	1142	1179
ENSDARG00000009477	ENSDART00000105879	22	10	10	ACACACTACGAGCAGCAGCTGGT	5	+	1132	1179
ENSDARG00000009477	ENSDART00000105879	22	10	10	ACATCACACACTACGAGCAGCAGCT	7	+	1127	1179
ENSDARG00000009477	ENSDART00000105880	22	1	1	TCCAGCGTCGAGGAGGAGGAGAA	5	+	217	1242
ENSDARG00000009477	ENSDART00000105880	22	1	1	GCAGCCCGCGGACCTGCTGGAGTT	6	+	78	1242
ENSDARG00000009477	ENSDART00000105880	22	1	1	GACTCCAGCGTCGAGGAGGAGGAG	6	+	214	1242
ENSDARG00000009477	ENSDART00000105880	22	1	1	GACTCCAGCGTCGAGGAGGAGGA	5	+	214	1242
ENSDARG00000009477	ENSDART00000105880	22	1	1	CACACCGACTCCAGCGTCGAGGAG	6	+	208	1242
ENSDARG00000009477	ENSDART00000105880	22	1	1	AGCCCAGCATGAGCGTGCCGGTGCC	7	+	2	1242
ENSDARG00000009477	ENSDART00000105880	22	1	1	GTTTCACGCTGGAGGTGCTGCGGCG	7	+	53	1242
ENSDARG00000009477	ENSDART00000105880	22	1	1	ACCGACTCCAGCGTCGAGGAGGAG	6	+	211	1242
ENSDARG00000009477	ENSDART00000105880	22	3	3	ACCCTATAACCCTGATGAGGATGAT	7	+	372	1242
ENSDARG00000009477	ENSDART00000105880	22	3	3	TGCTGCACCAGAAGACGGATGAGCA	7	+	428	1242
ENSDARG00000009477	ENSDART00000105880	22	3	3	GGCAGCGGCTGCAGGACGCCTGC	5	+	455	1242
ENSDARG00000009477	ENSDART00000105880	22	4	4	TTCTACGTCATCGAGAGGTGAGGCC	7	+	601	1242
ENSDARG00000009477	ENSDART00000105880	22	4	4	TTAGACAGCATGTTTGAGGTGTTG	6	+	529	1242
ENSDARG00000009477	ENSDART00000105880	22	4	4	TGCATCATCAATCAGGGTGACGAC	6	+	568	1242
ENSDARG00000009477	ENSDART00000105880	22	8	8	GACTGCTTCTACATCGTGGAGTCT	6	+	937	1242
ENSDARG00000009477	ENSDART00000105880	22	8	8	TTCTACATCGTGGAGTCTGGAGAG	6	+	943	1242
ENSDARG00000009477	ENSDART00000105880	22	9	9	AGCTGCATCTGTGTATGCTGTTGGA	7	+	1089	1242
ENSDARG00000009477	ENSDART00000105880	22	9	9	GTCAGCTCCTGCAGGAGGAGGTGGA	7	+	1001	1242
ENSDARG00000009477	ENSDART00000105880	22	9	9	GTCAGCTCCTGCAGGAGGAGGTG	5	+	1001	1242
ENSDARG00000009477	ENSDART00000105880	22	9	9	AGCTCCTGCAGGAGGAGGTGGAGGT	7	+	1004	1242
ENSDARG00000009477	ENSDART00000105880	22	9	9	AGCTCCTGCAGGAGGAGGTGGAG	5	+	1004	1242
ENSDARG00000009477	ENSDART00000105880	22	10	10	ACACACTACGAGCAGCAGCTGGT	5	+	1195	1242
ENSDARG00000009477	ENSDART00000105880	22	10	10	AGCAGCAGCTGGTGGCGGTGTTC	5	+	1205	1242
ENSDARG00000009477	ENSDART00000105880	22	10	10	ACATCACACACTACGAGCAGCAGCT	7	+	1190	1242
ENSDARG00000009673	ENSDART00000105460	22	2	2	GCAAACCTCCCAACTGTTGTTGCA	6	-	98	1434
ENSDARG00000009673	ENSDART00000105460	22	2	2	CAAACCTCCCAACTGTTGTTGCA	5	-	98	1434
ENSDARG00000009673	ENSDART00000105460	22	2	2	AACCTCCCAACTGTTGTTGCATCT	6	-	95	1434
ENSDARG00000009673	ENSDART00000105460	22	2	2	AACATCCACTGTTAACTTTGGTGTA	7	-	406	1434
ENSDARG00000009673	ENSDART00000105460	22	4	4	TGCAAATCCTGAGATGGCTTTGTTG	7	-	804	1434
ENSDARG00000009673	ENSDART00000105460	22	4	4	TGCAAATCCTGAGATGGCTTTGTT	6	-	805	1434
ENSDARG00000009673	ENSDART00000105460	22	4	4	TCCTGCAAATCCTGAGATGGCTTT	6	-	808	1434
ENSDARG00000009673	ENSDART00000105460	22	6	6	AGAGACGCAGGACTGGAGGACTTC	6	-	1038	1434
ENSDARG00000009673	ENSDART00000105460	22	8	8	GTCATCTACTAATCGAAGCATCT	5	-	1397	1434
ENSDARG00000009673	ENSDART00000105460	22	8	8	CTACTAATCGAAGCATCTGCTGTA	6	-	1391	1434
ENSDARG00000009881	ENSDART00000014330	22	1	1	TTCCTCAAACACGAAGGAAGACGAG	7	+	609	810
ENSDARG00000009881	ENSDART00000014330	22	1	1	TCCTCAAACACGAAGGAAGACGAG	6	+	610	810
ENSDARG00000009881	ENSDART00000014330	22	1	1	TCCCTCAGACACTACAGTAGCGGAA	7	+	450	810
ENSDARG00000009881	ENSDART00000014330	22	1	1	GGCACCAAACCTGAGGCCGAGGCA	6	+	721	810
ENSDARG00000009881	ENSDART00000014330	22	1	1	GCACCAAACCTGAGGCCGAGGCA	5	+	722	810
ENSDARG00000009881	ENSDART00000014330	22	1	1	GAAATCAGAACGAGTGGATTGTAC	6	+	354	810
ENSDARG00000009881	ENSDART00000014330	22	1	1	CTCAAACACGAAGGAAGACGAGGAA	7	+	612	810
ENSDARG00000009881	ENSDART00000014330	22	1	1	CCCTCAGACACTACAGTAGCGGAA	6	+	451	810
ENSDARG00000009881	ENSDART00000014330	22	1	1	CACCAAACCTGAGGCCGAGGCAGAG	7	+	723	810
ENSDARG00000009881	ENSDART00000014330	22	1	1	ATCACCGACTCCGAGCGGGAGAA	5	+	217	810
ENSDARG00000009881	ENSDART00000014330	22	1	1	AACTCACGCGTTCAGCGAGGCGGCA	7	+	67	810
ENSDARG00000009933	ENSDART00000009438	22	1	1	GTCGGCCGCCCAGACGCCGCTGAG	6	+	57	1770
ENSDARG00000009933	ENSDART00000009438	22	1	1	CTCAACGACCGCCTGGCCGTGTAC	6	+	127	1770
ENSDARG00000009933	ENSDART00000009438	22	1	1	CGCGTCGGCCGCCCAGACGCCGCT	6	+	54	1770
ENSDARG00000009933	ENSDART00000009438	22	2	2	AAAGTCAACTCTGAGCTTGAGGA	5	+	337	1770
ENSDARG00000009933	ENSDART00000009438	22	4	4	AGAAGCAGCTGGAGGTGGAGACTCT	7	+	554	1770
ENSDARG00000009933	ENSDART00000009438	22	5	5	GCAAACAACACGAGGAGCAGGTGCA	7	+	761	1770
ENSDARG00000009933	ENSDART00000009438	22	5	5	AAACAACACGAGGAGCAGGTGCA	5	+	763	1770
ENSDARG00000009933	ENSDART00000009438	22	8	8	TCCGTCCTCAAGGGTGACGGTGTC	6	+	1191	1770
ENSDARG00000009933	ENSDART00000009438	22	9	9	AGAGACAAATTGGAGACGGAGAG	5	+	1439	1770
ENSDARG00000009933	ENSDART00000009438	22	10	10	TCCTTCAGACCTGCTGTGGAAGAG	6	+	1554	1770
ENSDARG00000009933	ENSDART00000009438	22	10	10	TCCTCCTTCAGACCTGCTGTGGAA	6	+	1551	1770
ENSDARG00000009946	ENSDART00000012551	22	3	2	GACCTCATCGACCCTGGCTTTGGCT	7	+	391	2328
ENSDARG00000009946	ENSDART00000012551	22	3	2	GACCTCATCGACCCTGGCTTTGGC	6	+	391	2328
ENSDARG00000009946	ENSDART00000012551	22	3	2	AACGACATCGTTCAGCTGTTGGT	5	+	205	2328
ENSDARG00000009946	ENSDART00000012551	22	3	2	CTCATCGACCCTGGCTTTGGCTTT	6	+	394	2328
ENSDARG00000009946	ENSDART00000012551	22	4	3	GAAAACTCCAGCTGAAGATGGAGGA	7	+	495	2328
ENSDARG00000009946	ENSDART00000012551	22	4	3	AACTCCAGCTGAAGATGGAGGAGCT	7	+	498	2328
ENSDARG00000009946	ENSDART00000012551	22	4	3	TACCACGTCAAATATGAAGAGTAA	6	+	535	2328
ENSDARG00000009946	ENSDART00000012551	22	5	4	TTACCCAGAGAACGGTGTGGTGC	5	+	555	2328
ENSDARG00000009946	ENSDART00000012551	22	5	4	AGACGCGCACTCAGCGGGAGGTGTT	7	+	728	2328
ENSDARG00000009946	ENSDART00000012551	22	5	4	TTACCCAGAGAACGGTGTGGTGCA	6	+	555	2328
ENSDARG00000009946	ENSDART00000012551	22	5	4	AAAGACGTCCGTCCGCGGGCGCG	5	+	589	2328
ENSDARG00000009946	ENSDART00000012551	22	8	7	AACAGCTGCTGTGTGACGAGTGC	5	+	989	2328
ENSDARG00000009946	ENSDART00000012551	22	8	7	TGCAAAGACGACCCGAAGAAGAA	5	+	916	2328
ENSDARG00000009946	ENSDART00000012551	22	8	7	CTCACCACCATACCCGACGACGAA	6	+	1048	2328
ENSDARG00000009946	ENSDART00000012551	22	8	7	ACAAACAGCTGCTGTGTGACGAG	5	+	986	2328
ENSDARG00000009946	ENSDART00000012551	22	8	7	GTCTGCAACTGTCACGTGTGCGGCA	7	+	946	2328
ENSDARG00000009946	ENSDART00000012551	22	8	7	GACCCCGACAAACAGCTGCTGTG	5	+	979	2328
ENSDARG00000009946	ENSDART00000012551	22	12	11	ACCTACACAGGCTCCGGTGGACGAG	7	+	1432	2328
ENSDARG00000009946	ENSDART00000012551	22	13	12	AGCAAATACTCTCCCGAAGACGGA	6	+	1636	2328
ENSDARG00000009946	ENSDART00000012551	22	15	14	ACCAAAGGCAAGAGGAAGAGGAA	5	+	1906	2328
ENSDARG00000009946	ENSDART00000012551	22	15	14	CGCCAACCAAAGGCAAGAGGAAGAG	7	+	1901	2328
ENSDARG00000009946	ENSDART00000012551	22	16	15	CTCTCCGACCAAAGGGACGCCGAA	6	+	1953	2328
ENSDARG00000009946	ENSDART00000012551	22	17	16	TGCATCTGCTGCCAGGAGGTCGTC	6	+	2125	2328
ENSDARG00000009946	ENSDART00000012551	22	17	16	CAACACAACGTCTGCAGGGTGAGAC	7	+	2173	2328
ENSDARG00000009946	ENSDART00000012551	22	18	17	TACAGCAGCGGCCGGTGTTGACGAT	7	+	2320	2328
ENSDARG00000009946	ENSDART00000012551	22	18	17	CTCTTCCCCGGATACAGCAGCGGCC	7	+	2308	2328
ENSDARG00000009946	ENSDART00000012551	22	18	17	AAAAACTACCAAATGGCGGTCAAC	6	+	2257	2328
ENSDARG00000009946	ENSDART00000106192	22	3	2	GACCTCATCGACCCTGGCTTTGGC	6	+	391	2325
ENSDARG00000009946	ENSDART00000106192	22	3	2	GACCTCATCGACCCTGGCTTTGGCT	7	+	391	2325
ENSDARG00000009946	ENSDART00000106192	22	3	2	CTCATCGACCCTGGCTTTGGCTTT	6	+	394	2325
ENSDARG00000009946	ENSDART00000106192	22	3	2	AACGACATCGTTCAGCTGTTGGT	5	+	205	2325
ENSDARG00000009946	ENSDART00000106192	22	4	3	TACCACGTCAAATATGAAGAGTAA	6	+	535	2325
ENSDARG00000009946	ENSDART00000106192	22	4	3	GAAAACTCCAGCTGAAGATGGAGGA	7	+	495	2325
ENSDARG00000009946	ENSDART00000106192	22	4	3	AACTCCAGCTGAAGATGGAGGAGCT	7	+	498	2325
ENSDARG00000009946	ENSDART00000106192	22	5	4	AGACGCGCACTCAGCGGGAGGTGTT	7	+	728	2325
ENSDARG00000009946	ENSDART00000106192	22	5	4	AAAGACGTCCGTCCGCGGGCGCG	5	+	589	2325
ENSDARG00000009946	ENSDART00000106192	22	5	4	TTACCCAGAGAACGGTGTGGTGCA	6	+	555	2325
ENSDARG00000009946	ENSDART00000106192	22	5	4	TTACCCAGAGAACGGTGTGGTGC	5	+	555	2325
ENSDARG00000009946	ENSDART00000106192	22	7	6	GTCTGCAACTGTCACGTGTGCGGCA	7	+	943	2325
ENSDARG00000009946	ENSDART00000106192	22	7	6	GACCCCGACAAACAGCTGCTGTG	5	+	976	2325
ENSDARG00000009946	ENSDART00000106192	22	7	6	CTCACCACCATACCCGACGACGAA	6	+	1045	2325
ENSDARG00000009946	ENSDART00000106192	22	7	6	ACAAACAGCTGCTGTGTGACGAG	5	+	983	2325
ENSDARG00000009946	ENSDART00000106192	22	7	6	AACAGCTGCTGTGTGACGAGTGC	5	+	986	2325
ENSDARG00000009946	ENSDART00000106192	22	7	6	TGCAAAGACGACCCGAAGAAGAA	5	+	913	2325
ENSDARG00000009946	ENSDART00000106192	22	11	10	ACCTACACAGGCTCCGGTGGACGAG	7	+	1429	2325
ENSDARG00000009946	ENSDART00000106192	22	12	11	AGCAAATACTCTCCCGAAGACGGA	6	+	1633	2325
ENSDARG00000009946	ENSDART00000106192	22	14	13	CGCCAACCAAAGGCAAGAGGAAGAG	7	+	1898	2325
ENSDARG00000009946	ENSDART00000106192	22	14	13	ACCAAAGGCAAGAGGAAGAGGAA	5	+	1903	2325
ENSDARG00000009946	ENSDART00000106192	22	15	14	CTCTCCGACCAAAGGGACGCCGAA	6	+	1950	2325
ENSDARG00000009946	ENSDART00000106192	22	16	15	TGCATCTGCTGCCAGGAGGTCGTC	6	+	2122	2325
ENSDARG00000009946	ENSDART00000106192	22	16	15	CAACACAACGTCTGCAGGGTGAGAC	7	+	2170	2325
ENSDARG00000009946	ENSDART00000106192	22	17	16	TACAGCAGCGGCCGGTGTTGACGAT	7	+	2317	2325
ENSDARG00000009946	ENSDART00000106192	22	17	16	CTCTTCCCCGGATACAGCAGCGGCC	7	+	2305	2325
ENSDARG00000009946	ENSDART00000106192	22	17	16	AAAAACTACCAAATGGCGGTCAAC	6	+	2254	2325
ENSDARG00000010002	ENSDART00000044411	22	1	1	AGCTCAAACTCCTCTTGCTGGGTA	6	+	125	1077
ENSDARG00000010002	ENSDART00000044411	22	1	1	AGCTCAAACTCCTCTTGCTGGGTAA	7	+	125	1077
ENSDARG00000010002	ENSDART00000044411	22	1	1	CTCAAACTCCTCTTGCTGGGTAA	5	+	127	1077
ENSDARG00000010002	ENSDART00000044411	22	3	3	ATCTGCAGAAAAACGCTCTGCTGGT	7	+	323	1077
ENSDARG00000010002	ENSDART00000044411	22	4	4	GACTCAGCAAGACGTGCTTAGGGT	6	+	531	1077
ENSDARG00000010002	ENSDART00000044411	22	7	7	ATCCGCTTCGTCTTCGCAGCGGTC	6	+	1018	1077
ENSDARG00000010002	ENSDART00000079113	22	3	3	ATCTGCAGAAAAACGCTCTGCTGGT	7	+	225	966
ENSDARG00000010002	ENSDART00000079113	22	8	8	ATCCGCTTCGTCTTCGCAGCGGTC	6	+	907	966
ENSDARG00000010002	ENSDART00000105566	22	1	1	CTCAAACTCCTCTTGCTGGGTAA	5	+	127	1206
ENSDARG00000010002	ENSDART00000105566	22	1	1	AGCTCAAACTCCTCTTGCTGGGTAA	7	+	125	1206
ENSDARG00000010002	ENSDART00000105566	22	1	1	AGCTCAAACTCCTCTTGCTGGGTA	6	+	125	1206
ENSDARG00000010002	ENSDART00000105566	22	3	3	ATCTGCAGAAAAACGCTCTGCTGGT	7	+	323	1206
ENSDARG00000010002	ENSDART00000105566	22	5	5	GACTCAGCAAGACGTGCTTAGGGT	6	+	660	1206
ENSDARG00000010002	ENSDART00000105566	22	8	8	ATCCGCTTCGTCTTCGCAGCGGTC	6	+	1147	1206
ENSDARG00000010191	ENSDART00000025975	22	2	1	ACCTGCTGCTGCTGCGGGGAATCT	6	-	21	825
ENSDARG00000010191	ENSDART00000025975	22	2	1	CTCCTCAACCTGCTGCTGCTGCG	5	-	29	825
ENSDARG00000010191	ENSDART00000025975	22	2	1	TCCTCAACCTGCTGCTGCTGCGGGG	7	-	26	825
ENSDARG00000010191	ENSDART00000025975	22	5	4	ATCAGCCACGATGATCTGCCTCT	5	-	374	825
ENSDARG00000010191	ENSDART00000025975	22	5	4	CAATCAGCCACGATGATCTGCCTCT	7	-	374	825
ENSDARG00000010191	ENSDART00000025975	22	6	5	GTCCGCCGCTGCCGGTCGAGGTG	5	-	591	825
ENSDARG00000010191	ENSDART00000025975	22	6	5	CGCCGCTGCCGGTCGAGGTGTTGTG	7	-	586	825
ENSDARG00000010191	ENSDART00000025975	22	6	5	CGCCGCTGCCGGTCGAGGTGTTG	5	-	588	825
ENSDARG00000010191	ENSDART00000025975	22	6	5	ACAATCTTCAGCAGGTGTGGAGGCA	7	-	695	825
ENSDARG00000010191	ENSDART00000025975	22	6	5	ACAATCTTCAGCAGGTGTGGAGGC	6	-	696	825
ENSDARG00000010191	ENSDART00000105675	22	1	1	CTCCTCAACCTGCTGCTGCTGCG	5	-	29	1737
ENSDARG00000010191	ENSDART00000105675	22	1	1	ACCTGCTGCTGCTGCGGGGAATCT	6	-	21	1737
ENSDARG00000010191	ENSDART00000105675	22	1	1	TCCTCAACCTGCTGCTGCTGCGGGG	7	-	26	1737
ENSDARG00000010191	ENSDART00000105675	22	4	4	CAATCAGCCACGATGATCTGCCTCT	7	-	374	1737
ENSDARG00000010191	ENSDART00000105675	22	4	4	ATCAGCCACGATGATCTGCCTCT	5	-	374	1737
ENSDARG00000010191	ENSDART00000105675	22	5	5	ACAATCTTCAGCAGGTGTGGAGGCA	7	-	695	1737
ENSDARG00000010191	ENSDART00000105675	22	5	5	CGCCGCTGCCGGTCGAGGTGTTG	5	-	588	1737
ENSDARG00000010191	ENSDART00000105675	22	5	5	CGCCGCTGCCGGTCGAGGTGTTGTG	7	-	586	1737
ENSDARG00000010191	ENSDART00000105675	22	5	5	ACAATCTTCAGCAGGTGTGGAGGC	6	-	696	1737
ENSDARG00000010191	ENSDART00000105675	22	5	5	GTCCGCCGCTGCCGGTCGAGGTG	5	-	591	1737
ENSDARG00000010191	ENSDART00000105675	22	6	6	GCACGCGTCCCTTGAAGAAGATGAA	7	-	946	1737
ENSDARG00000010191	ENSDART00000105675	22	6	6	GCCTTCTTCTGAAGGATGGCTTT	5	-	898	1737
ENSDARG00000010191	ENSDART00000105675	22	7	7	GCCAGCGCACTGTTGATTTGGCA	5	-	982	1737
ENSDARG00000010191	ENSDART00000105675	22	9	9	TGCTCAATCTGATTGTTTTTGCG	5	-	1255	1737
ENSDARG00000010191	ENSDART00000105675	22	11	11	GGCCTATGCTTGACTGGTCGTCGAG	7	-	1429	1737
ENSDARG00000010191	ENSDART00000105675	22	12	12	AGACGCAGCCCAGCTCGTAGCAGGC	7	-	1579	1737
ENSDARG00000010312	ENSDART00000010537	22	2	2	CAACAAGACCAATGAAGGTGAAGCT	7	+	435	3303
ENSDARG00000010312	ENSDART00000010537	22	2	2	CCCCTCATCTCTGCGGAGGAGGA	5	+	340	3303
ENSDARG00000010312	ENSDART00000010537	22	2	2	CCCCTCATCTCTGCGGAGGAGGAC	6	+	340	3303
ENSDARG00000010312	ENSDART00000010537	22	2	2	GACGCCACCTACAGGCAGGAGAT	5	+	286	3303
ENSDARG00000010312	ENSDART00000010537	22	2	2	AGACAAACCCAAATGGCTGGGAT	5	+	309	3303
ENSDARG00000010312	ENSDART00000010537	22	2	2	TCCCTCCACGCACACGGCCTGAGCT	7	+	409	3303
ENSDARG00000010312	ENSDART00000010537	22	4	4	GCCAAAGTCAACAAGGATGACGAA	6	+	787	3303
ENSDARG00000010312	ENSDART00000010537	22	4	4	AAAGTCAACAAGGATGACGAAGCC	6	+	790	3303
ENSDARG00000010312	ENSDART00000010537	22	6	6	GTAGCCGGCATGCAAGCATTTTTT	6	+	1090	3303
ENSDARG00000010312	ENSDART00000010537	22	6	6	AACCCAGACCATTCGGGGAAGTG	5	+	1145	3303
ENSDARG00000010312	ENSDART00000010537	22	6	6	AAACCCAGACCATTCGGGGAAGTG	6	+	1144	3303
ENSDARG00000010312	ENSDART00000010537	22	7	7	AAACGCAAAGAGAAGACGCCGGA	5	+	1354	3303
ENSDARG00000010312	ENSDART00000010537	22	7	7	ACCAAACGCAAAGAGAAGACGCC	5	+	1351	3303
ENSDARG00000010312	ENSDART00000010537	22	10	10	CACCAACTCAGGGCTGGTTGGAC	5	+	1737	3303
ENSDARG00000010312	ENSDART00000010537	22	10	10	ACCACCTACAAATATGAGTGGGTG	6	+	1630	3303
ENSDARG00000010312	ENSDART00000010537	22	10	10	ACCTACAAATATGAGTGGGTGGTC	6	+	1633	3303
ENSDARG00000010312	ENSDART00000010537	22	10	10	ACCTACAAATATGAGTGGGTGGT	5	+	1633	3303
ENSDARG00000010312	ENSDART00000010537	22	10	10	GACACCAACTCAGGGCTGGTTGGAC	7	+	1735	3303
ENSDARG00000010312	ENSDART00000010537	22	11	11	CAAAGCAGCCCAAATCTGTGAATAA	7	+	1892	3303
ENSDARG00000010312	ENSDART00000010537	22	13	13	GCCAACTACACCGTGGAGAAGTG	5	+	2221	3303
ENSDARG00000010312	ENSDART00000010537	22	13	13	TTCACCCACCCGCACATGGGAGGAC	7	+	2325	3303
ENSDARG00000010312	ENSDART00000010537	22	13	13	CACCCACCCGCACATGGGAGGAC	5	+	2327	3303
ENSDARG00000010312	ENSDART00000010537	22	14	14	TTCACCAAACTCAAGGAGAGGAC	5	+	2464	3303
ENSDARG00000010312	ENSDART00000010537	22	14	14	GGCTCCAAATATAAGAAGGTGCT	5	+	2416	3303
ENSDARG00000010312	ENSDART00000010537	22	17	17	ACCCTCCCAAAGCACTGACGGAGGA	7	+	2915	3303
ENSDARG00000010312	ENSDART00000010537	22	19	19	ACACACAGAGCAGACGTGTTTGAT	6	+	3121	3303
ENSDARG00000010312	ENSDART00000104512	22	1	1	TTCACCAAACTCAAGGAGAGGAC	5	+	7	576
ENSDARG00000010312	ENSDART00000104512	22	3	3	ACCCTCCCAAAGCACTGACGGAGGA	7	+	188	576
ENSDARG00000010312	ENSDART00000104512	22	5	5	ACACACAGAGCAGACGTGTTTGAT	6	+	394	576
ENSDARG00000010312	ENSDART00000104514	22	2	2	GGCTCCAAATATAAGAAGGTGCT	5	+	85	579
ENSDARG00000010312	ENSDART00000104514	22	3	3	ACCCTCCCAAAGCACTGACGGAGGA	7	+	191	579
ENSDARG00000010312	ENSDART00000104514	22	5	5	ACACACAGAGCAGACGTGTTTGAT	6	+	397	579
ENSDARG00000010481	ENSDART00000013575	22	2	1	TTAAAACGCTGGCCGGTAAGCGTTG	7	-	35	1257
ENSDARG00000010481	ENSDART00000013575	22	3	2	TTCCAAATCAGTGCCAGTTTGGTTC	7	-	129	1257
ENSDARG00000010481	ENSDART00000013575	22	3	2	TCCAGCCACCAGGATGTCGAAGAG	6	-	217	1257
ENSDARG00000010481	ENSDART00000013575	22	3	2	TCCTCCAGCCACCAGGATGTCGAA	6	-	220	1257
ENSDARG00000010481	ENSDART00000013575	22	7	6	AGCAGCAACTGAGTTGATGTCTTT	6	-	598	1257
ENSDARG00000010481	ENSDART00000013575	22	8	7	TCCTTCAGCCCAGCGTCGGTGAA	5	-	706	1257
ENSDARG00000010481	ENSDART00000013575	22	8	7	TGCTCCTGCAGCTCTTTCTGAAGCT	7	-	776	1257
ENSDARG00000010481	ENSDART00000013575	22	10	9	GCCTTCAGCAGTGGGCTGTATTG	5	-	976	1257
ENSDARG00000010481	ENSDART00000013575	22	10	9	AGCTCAGACAGGCCCTGTGAGGTG	6	-	1002	1257
ENSDARG00000010481	ENSDART00000013575	22	11	10	TTCATCTGCTCAAGGAAGACGCT	5	-	1180	1257
ENSDARG00000010531	ENSDART00000049434	22	3	2	AGACGCGACGCACAAGCTGGCGGT	6	-	107	693
ENSDARG00000010531	ENSDART00000049434	22	3	2	CGCGACGCACAAGCTGGCGGTGGG	6	-	104	693
ENSDARG00000010531	ENSDART00000049434	22	3	2	CGCGACGCACAAGCTGGCGGTGGGG	7	-	103	693
ENSDARG00000010531	ENSDART00000049434	22	7	6	TCCAGCTTCTCTTACAGTTGGATTT	7	-	597	693
ENSDARG00000010531	ENSDART00000049434	22	7	6	CTCCGCCACGATACAGTCGATGAA	6	-	524	693
ENSDARG00000011281	ENSDART00000090468	22	3	3	CACCACTCCATAAAGCAGCATTC	5	+	260	2901
ENSDARG00000011281	ENSDART00000090468	22	3	3	ACACCACTCCATAAAGCAGCATTC	6	+	259	2901
ENSDARG00000011281	ENSDART00000090468	22	4	4	TGCTCCTTCAGCATGACGCTTGT	5	+	308	2901
ENSDARG00000011281	ENSDART00000090468	22	6	6	ACACACCACTGCATTGCGCCGCT	5	+	542	2901
ENSDARG00000011281	ENSDART00000090468	22	6	6	CACCACTGCATTGCGCCGCTTAC	5	+	545	2901
ENSDARG00000011281	ENSDART00000090468	22	6	6	AAACACACCACTGCATTGCGCCGCT	7	+	540	2901
ENSDARG00000011281	ENSDART00000090468	22	10	10	ACACACGCCGGCAAGGTTGTAAAC	6	+	842	2901
ENSDARG00000011281	ENSDART00000090468	22	13	13	GTCACCAGAGACTGGAGAAGGAGGT	7	+	1127	2901
ENSDARG00000011281	ENSDART00000090468	22	15	15	GTCAAAGGCTCGTCGCCGCGTAG	5	+	1405	2901
ENSDARG00000011281	ENSDART00000090468	22	16	16	GTCCCAAGAAGAGCGTCGAGGAG	5	+	1584	2901
ENSDARG00000011281	ENSDART00000090468	22	16	16	CACGACGACTTCACGTCTGAGCT	5	+	1525	2901
ENSDARG00000011281	ENSDART00000090468	22	17	17	GCATCCTAAGGAAGTGCATTGGGA	6	+	1709	2901
ENSDARG00000011281	ENSDART00000090468	22	19	19	AAACCCTTCAACCCCCTGCTAGGAG	7	+	1924	2901
ENSDARG00000011281	ENSDART00000090468	22	20	20	ATCCCAAACTGAAGTTTTGGGGCA	6	+	2078	2901
ENSDARG00000011281	ENSDART00000090468	22	20	20	ATCCCAAACTGAAGTTTTGGGGC	5	+	2078	2901
ENSDARG00000011281	ENSDART00000090468	22	20	20	ATCAGCGCCTTCCATGCTGAGGG	5	+	2020	2901
ENSDARG00000011281	ENSDART00000090468	22	20	20	AGCGCCTTCCATGCTGAGGGTTTG	6	+	2023	2901
ENSDARG00000011281	ENSDART00000090468	22	20	20	GTTTGCAGAAGAACTTTGTGTTT	5	+	2042	2901
ENSDARG00000011281	ENSDART00000090468	22	20	20	ATCAGCGCCTTCCATGCTGAGGGT	6	+	2020	2901
ENSDARG00000011281	ENSDART00000090468	22	22	22	GGCTACATCTTAGATAAGAGGTC	5	+	2335	2901
ENSDARG00000011281	ENSDART00000090468	22	24	24	GTCTCAGTCATCAGACTCTGAAGAA	7	+	2481	2901
ENSDARG00000011281	ENSDART00000090468	22	24	24	GAAGTCAGCTGCTTTGGAGAATAG	6	+	2546	2901
ENSDARG00000011281	ENSDART00000090468	22	24	24	AAACACCTCAACCAGGTGGAGAT	5	+	2504	2901
ENSDARG00000011281	ENSDART00000090468	22	24	24	AGAAACACCTCAACCAGGTGGAGAT	7	+	2502	2901
ENSDARG00000011281	ENSDART00000090468	22	25	25	ATCCCCAAAACGGACAGCAGACTAA	7	+	2659	2901
ENSDARG00000011281	ENSDART00000090468	22	25	25	CCCCAAAACGGACAGCAGACTAA	5	+	2661	2901
ENSDARG00000011281	ENSDART00000090468	22	25	25	TCCCCAAAACGGACAGCAGACTAA	6	+	2660	2901
ENSDARG00000011281	ENSDART00000090468	22	25	25	CCCTGCAACTCAATGAGCTGGATAA	7	+	2618	2901
ENSDARG00000011281	ENSDART00000090468	22	26	26	CAAGTCAGATGATGAGTGGAAGGC	6	+	2784	2901
ENSDARG00000011281	ENSDART00000090468	22	26	26	AACCGCTCCAAGTCAGATGATGAG	6	+	2776	2901
ENSDARG00000011376	ENSDART00000019854	22	5	5	GAAGACAACCAAGTGGGTGATGAA	6	+	373	909
ENSDARG00000011376	ENSDART00000019854	22	6	6	CAAAGCCCAAAGACTCGCAGAAGGA	7	+	482	909
ENSDARG00000011376	ENSDART00000019854	22	7	7	GACAACACCTACGACAGGTGAGGAG	7	+	703	909
ENSDARG00000011376	ENSDART00000019854	22	7	7	GACTTCAACGCAGACGGTGCTTAC	6	+	580	909
ENSDARG00000011376	ENSDART00000019854	22	7	7	TACGTCTCCAAGAAGAAGATGAA	5	+	601	909
ENSDARG00000011376	ENSDART00000019854	22	7	7	GGCGACTTCAACGCAGACGGTGCT	6	+	577	909
ENSDARG00000011376	ENSDART00000019854	22	8	8	TACAAACTCACAGAAGAAGAGGTG	6	+	796	909
ENSDARG00000011376	ENSDART00000019854	22	8	8	GCCTACAAACTCACAGAAGAAGAG	6	+	793	909
ENSDARG00000011538	ENSDART00000023984	22	1	1	CTCTTCTCCATGTATGGGTTTGC	5	-	94	483
ENSDARG00000011538	ENSDART00000023984	22	1	1	CTCTTCTCCATGTATGGGTTTGCA	6	-	93	483
ENSDARG00000011538	ENSDART00000023984	22	1	1	GTTTGCAGAGGTAGAGGATGAAGAT	7	-	75	483
ENSDARG00000011538	ENSDART00000023984	22	2	2	CACATCCTCAGGCGAGAAGTCTTG	6	-	247	483
ENSDARG00000011538	ENSDART00000023984	22	3	3	GTCCACATCTTCTGGTAGCTGGC	5	-	359	483
ENSDARG00000011538	ENSDART00000023984	22	3	3	GCATGCTCCAGTTTAGCTGTGTTT	6	-	441	483
ENSDARG00000011673	ENSDART00000033332	22	3	3	TCCCGCAGCTCTCTGCAGTTTGC	5	+	219	450
ENSDARG00000011673	ENSDART00000033332	22	4	4	CACGTCGCCGGATGAGTGCGAATGT	7	+	360	450
ENSDARG00000011890	ENSDART00000027969	22	1	1	AACCCCAGCCTGTTGGGGGCGCT	5	+	73	1455
ENSDARG00000011890	ENSDART00000027969	22	1	1	GACGGCTAACATCCTGCGGGAGCT	6	+	261	1455
ENSDARG00000011890	ENSDART00000027969	22	4	4	TGCCCAGCACCACTGGTCTGAGTC	6	+	746	1455
ENSDARG00000011890	ENSDART00000027969	22	4	4	GCACCATCCCCAACTCTCTGTTGCC	7	+	725	1455
ENSDARG00000011890	ENSDART00000027969	22	4	4	ACCATCCCCAACTCTCTGTTGCC	5	+	727	1455
ENSDARG00000011890	ENSDART00000027969	22	7	7	AACTTCACCAAGATGGAGGGAAAC	6	+	922	1455
ENSDARG00000011890	ENSDART00000082365	22	1	1	GACGGCTAACATCCTGCGGGAGCT	6	+	249	1254
ENSDARG00000011890	ENSDART00000082365	22	1	1	AACCCCAGCCTGTTGGGGGCGCT	5	+	61	1254
ENSDARG00000011890	ENSDART00000082365	22	4	4	ACCATCCCCAACTCTCTGTTGCC	5	+	715	1254
ENSDARG00000011890	ENSDART00000082365	22	4	4	GCACCATCCCCAACTCTCTGTTGCC	7	+	713	1254
ENSDARG00000011890	ENSDART00000082365	22	4	4	TGCCCAGCACCACTGGTCTGAGTC	6	+	734	1254
ENSDARG00000011890	ENSDART00000082372	22	2	2	AACCCCAGCCTGTTGGGGGCGCT	5	+	124	1737
ENSDARG00000011890	ENSDART00000082372	22	2	2	GTTTCAGCCCGTCTGAAGTGTTT	5	+	26	1737
ENSDARG00000011890	ENSDART00000082372	22	2	2	GACGGCTAACATCCTGCGGGAGCT	6	+	312	1737
ENSDARG00000011890	ENSDART00000082372	22	5	5	TGCCCAGCACCACTGGTCTGAGTC	6	+	797	1737
ENSDARG00000011890	ENSDART00000082372	22	5	5	GCACCATCCCCAACTCTCTGTTGCC	7	+	776	1737
ENSDARG00000011890	ENSDART00000082372	22	5	5	ACCATCCCCAACTCTCTGTTGCC	5	+	778	1737
ENSDARG00000011890	ENSDART00000082372	22	7	7	AACTTCACCAAGATGGAGGGAAAC	6	+	976	1737
ENSDARG00000011890	ENSDART00000105870	22	1	1	AACCCCAGCCTGTTGGGGGCGCT	5	+	61	1452
ENSDARG00000011890	ENSDART00000105870	22	1	1	GACGGCTAACATCCTGCGGGAGCT	6	+	249	1452
ENSDARG00000011890	ENSDART00000105870	22	4	4	TGCCCAGCACCACTGGTCTGAGTC	6	+	734	1452
ENSDARG00000011890	ENSDART00000105870	22	4	4	GCACCATCCCCAACTCTCTGTTGCC	7	+	713	1452
ENSDARG00000011890	ENSDART00000105870	22	4	4	ACCATCCCCAACTCTCTGTTGCC	5	+	715	1452
ENSDARG00000011890	ENSDART00000105870	22	7	7	AACTTCACCAAGATGGAGGGAAAC	6	+	913	1452
ENSDARG00000011890	ENSDART00000105873	22	1	1	AACCCCAGCCTGTTGGGGGCGCT	5	+	103	1719
ENSDARG00000011890	ENSDART00000105873	22	1	1	GTTTCAGCCCGTCTGAAGTGTTT	5	+	5	1719
ENSDARG00000011890	ENSDART00000105873	22	1	1	GACGGCTAACATCCTGCGGGAGCT	6	+	291	1719
ENSDARG00000011890	ENSDART00000105873	22	4	4	TGCCCAGCACCACTGGTCTGAGTC	6	+	776	1719
ENSDARG00000011890	ENSDART00000105873	22	4	4	GCACCATCCCCAACTCTCTGTTGCC	7	+	755	1719
ENSDARG00000011890	ENSDART00000105873	22	4	4	ACCATCCCCAACTCTCTGTTGCC	5	+	757	1719
ENSDARG00000011890	ENSDART00000105873	22	6	6	AACTTCACCAAGATGGAGGGAAAC	6	+	958	1719
ENSDARG00000011931	ENSDART00000022397	22	2	2	GCAGACAGAGATATGGTGGAGCA	5	+	175	864
ENSDARG00000011931	ENSDART00000022397	22	3	3	GCCTCCATCATGAATGCAGTGGGC	6	+	340	864
ENSDARG00000011931	ENSDART00000022397	22	7	7	ATCTTCACCCTCTGGAGGTCGAT	5	+	779	864
ENSDARG00000011931	ENSDART00000022397	22	7	7	CTCTTCAGCAGTCCTGAGGGATTG	6	+	811	864
ENSDARG00000012051	ENSDART00000025198	22	4	3	TCCTGCACAGAAAACCTCTGCCGGA	7	-	569	654
ENSDARG00000012051	ENSDART00000025198	22	4	3	AGAGTCTGCAAAAGTGCAGGAAAC	6	-	462	654
ENSDARG00000012572	ENSDART00000015512	22	2	2	TGCTGCGCCTCAACGTGAGGCATGT	7	-	125	942
ENSDARG00000012572	ENSDART00000015512	22	3	3	ACACAAACCTTGCAGACTGGGTA	5	-	237	942
ENSDARG00000012572	ENSDART00000015512	22	5	5	ACAGACTTCACTGCTTTAATGAGTT	7	-	404	942
ENSDARG00000012572	ENSDART00000015512	22	5	5	CTCTCAAGATTCTTGAGGATTTT	5	-	376	942
ENSDARG00000012572	ENSDART00000015512	22	5	5	TTACTCTTATATCTGATGTCTCT	5	-	331	942
ENSDARG00000012572	ENSDART00000015512	22	7	7	CTCTGCACCATAGGGCTCTGCTTAC	7	-	596	942
ENSDARG00000012790	ENSDART00000027605	22	3	3	ACACAACTCGCCTTCAGATGGATGT	7	-	132	1243
ENSDARG00000012790	ENSDART00000027605	22	5	5	ATCAACTACACTATAGTAGCCTTC	6	-	373	1243
ENSDARG00000012790	ENSDART00000027605	22	6	6	CTCCTCAGAGAGGAAGTAGTGGCT	6	-	478	1243
ENSDARG00000012790	ENSDART00000027605	22	6	6	GCCACCCTCCTCAGAGAGGAAGTA	6	-	484	1243
ENSDARG00000012790	ENSDART00000027605	22	6	6	ACCCTCCTCAGAGAGGAAGTAGTG	6	-	481	1243
ENSDARG00000012790	ENSDART00000027605	22	6	6	AGAACCAGCATCGCAATAAGAAGAG	7	-	542	1243
ENSDARG00000012790	ENSDART00000027605	22	8	8	AACAGCATCCAGGTGAGTTTGGGCC	7	-	759	1243
ENSDARG00000012790	ENSDART00000027605	22	8	8	AACAGCATCCAGGTGAGTTTGGG	5	-	761	1243
ENSDARG00000012790	ENSDART00000083879	22	3	3	ACACAACTCGCCTTCAGATGGATGT	7	-	180	1533
ENSDARG00000012790	ENSDART00000083879	22	5	5	ATCAACTACACTATAGTAGCCTTC	6	-	421	1533
ENSDARG00000012790	ENSDART00000083879	22	6	6	GCCACCCTCCTCAGAGAGGAAGTA	6	-	532	1533
ENSDARG00000012790	ENSDART00000083879	22	6	6	CTCCTCAGAGAGGAAGTAGTGGCT	6	-	526	1533
ENSDARG00000012790	ENSDART00000083879	22	6	6	AGAACCAGCATCGCAATAAGAAGAG	7	-	590	1533
ENSDARG00000012790	ENSDART00000083879	22	6	6	ACCCTCCTCAGAGAGGAAGTAGTG	6	-	529	1533
ENSDARG00000012790	ENSDART00000083879	22	8	8	AACAGCATCCAGGTGAGTTTGGGCC	7	-	807	1533
ENSDARG00000012790	ENSDART00000083879	22	8	8	AACAGCATCCAGGTGAGTTTGGG	5	-	809	1533
ENSDARG00000012790	ENSDART00000083879	22	12	12	GTCTTCATCGTCTTCTGGGCCGGG	6	-	1330	1533
ENSDARG00000012790	ENSDART00000083879	22	12	12	TTCATCGTCTTCTGGGCCGGGTAC	6	-	1327	1533
ENSDARG00000012790	ENSDART00000105425	22	2	2	ACACAACTCGCCTTCAGATGGATGT	7	-	132	1440
ENSDARG00000012790	ENSDART00000105425	22	4	4	ATCAACTACACTATAGTAGCCTTC	6	-	373	1440
ENSDARG00000012790	ENSDART00000105425	22	5	5	GCCACCCTCCTCAGAGAGGAAGTA	6	-	484	1440
ENSDARG00000012790	ENSDART00000105425	22	5	5	CTCCTCAGAGAGGAAGTAGTGGCT	6	-	478	1440
ENSDARG00000012790	ENSDART00000105425	22	5	5	AGAACCAGCATCGCAATAAGAAGAG	7	-	542	1440
ENSDARG00000012790	ENSDART00000105425	22	5	5	ACCCTCCTCAGAGAGGAAGTAGTG	6	-	481	1440
ENSDARG00000012790	ENSDART00000105425	22	7	7	AACAGCATCCAGGTGAGTTTGGGCC	7	-	759	1440
ENSDARG00000012790	ENSDART00000105425	22	7	7	AACAGCATCCAGGTGAGTTTGGG	5	-	761	1440
ENSDARG00000012790	ENSDART00000105425	22	12	12	GTCTTCATCGTCTTCTGGGCCGGG	6	-	1237	1440
ENSDARG00000012790	ENSDART00000105425	22	12	12	TTCATCGTCTTCTGGGCCGGGTAC	6	-	1234	1440
ENSDARG00000012790	ENSDART00000105426	22	5	5	ACACAACTCGCCTTCAGATGGATGT	7	-	180	1533
ENSDARG00000012790	ENSDART00000105426	22	7	7	ATCAACTACACTATAGTAGCCTTC	6	-	421	1533
ENSDARG00000012790	ENSDART00000105426	22	8	8	GCCACCCTCCTCAGAGAGGAAGTA	6	-	532	1533
ENSDARG00000012790	ENSDART00000105426	22	8	8	CTCCTCAGAGAGGAAGTAGTGGCT	6	-	526	1533
ENSDARG00000012790	ENSDART00000105426	22	8	8	AGAACCAGCATCGCAATAAGAAGAG	7	-	590	1533
ENSDARG00000012790	ENSDART00000105426	22	8	8	ACCCTCCTCAGAGAGGAAGTAGTG	6	-	529	1533
ENSDARG00000012790	ENSDART00000105426	22	10	10	AACAGCATCCAGGTGAGTTTGGGCC	7	-	807	1533
ENSDARG00000012790	ENSDART00000105426	22	10	10	AACAGCATCCAGGTGAGTTTGGG	5	-	809	1533
ENSDARG00000012790	ENSDART00000105426	22	14	14	GTCTTCATCGTCTTCTGGGCCGGG	6	-	1330	1533
ENSDARG00000012790	ENSDART00000105426	22	14	14	TTCATCGTCTTCTGGGCCGGGTAC	6	-	1327	1533
ENSDARG00000013022	ENSDART00000059502	22	1	1	CTCATCTCCATGTAGTTTAGTAA	5	-	59	498
ENSDARG00000013022	ENSDART00000059502	22	3	3	TGCAACTCCAAACAGCAGCAGCA	5	-	386	498
ENSDARG00000013022	ENSDART00000059502	22	3	3	AACTCCAAACAGCAGCAGCAGAA	5	-	383	498
ENSDARG00000013279	ENSDART00000017305	22	2	2	CCCGTCCTCCAGCTGAATGGTGT	5	-	110	1662
ENSDARG00000013279	ENSDART00000017305	22	4	4	CGCTCAGACCTTGCTGGCGTAGTT	6	-	376	1662
ENSDARG00000013279	ENSDART00000017305	22	4	4	CACAGCGCCCCCTGGCTGATGGT	5	-	320	1662
ENSDARG00000013279	ENSDART00000017305	22	4	4	CGCTCAGACCTTGCTGGCGTAGTTC	7	-	375	1662
ENSDARG00000013279	ENSDART00000017305	22	4	4	TTCTCCAGCGTGGCGATGGTGTC	5	-	355	1662
ENSDARG00000013279	ENSDART00000017305	22	5	5	GCATTCTCCATGTTGTCGTCGGC	5	-	412	1662
ENSDARG00000013279	ENSDART00000017305	22	6	6	ACCTTCAGATGGTGCGCGGTGGTG	6	-	558	1662
ENSDARG00000013279	ENSDART00000017305	22	6	6	GTTCACAGCGGAAACTTCTGTCTGT	7	-	511	1662
ENSDARG00000013279	ENSDART00000017305	22	9	9	GAAGTCTCCATGTGCGGTGCGTTT	6	-	1120	1662
ENSDARG00000013279	ENSDART00000017305	22	9	9	TACGGCTTACAGTGTGTGTGGAC	5	-	1042	1662
ENSDARG00000013279	ENSDART00000017305	22	9	9	CTCACCGTCCTCTGTGGTGTCGAA	6	-	1141	1662
ENSDARG00000013279	ENSDART00000017305	22	9	9	ACCGTCCTCTGTGGTGTCGAAGTC	6	-	1138	1662
ENSDARG00000013279	ENSDART00000017305	22	9	9	AAACTCTTCCCGCAGCCGGGGAC	5	-	985	1662
ENSDARG00000013279	ENSDART00000017305	22	9	9	ACACTCACCGTCCTCTGTGGTGTC	6	-	1144	1662
ENSDARG00000013279	ENSDART00000017305	22	12	12	GACGTCACATATATTGAAGCAGGG	6	-	1203	1662
ENSDARG00000013279	ENSDART00000017305	22	13	13	ACCTGCTGCCCGCCGCTGTGGCTCT	7	-	1427	1662
ENSDARG00000013279	ENSDART00000017305	22	13	13	GCCCGCCGCTGTGGCTCTGCTGGG	6	-	1421	1662
ENSDARG00000013279	ENSDART00000017305	22	13	13	ACCTGCTGCCCGCCGCTGTGGCT	5	-	1429	1662
ENSDARG00000013279	ENSDART00000017305	22	14	14	GCCACCTGCTGGTATGCCGACGAG	6	-	1527	1662
ENSDARG00000013279	ENSDART00000022640	22	2	2	CCCGTCCTCCAGCTGAATGGTGT	5	-	107	1551
ENSDARG00000013279	ENSDART00000022640	22	4	4	CGCTCAGACCTTGCTGGCGTAGTT	6	-	367	1551
ENSDARG00000013279	ENSDART00000022640	22	4	4	CACAGCGCCCCCTGGCTGATGGT	5	-	311	1551
ENSDARG00000013279	ENSDART00000022640	22	4	4	CGCTCAGACCTTGCTGGCGTAGTTC	7	-	366	1551
ENSDARG00000013279	ENSDART00000022640	22	4	4	TTCTCCAGCGTGGCGATGGTGTC	5	-	346	1551
ENSDARG00000013279	ENSDART00000022640	22	5	5	GCATTCTCCATGTTGTCGTCGGC	5	-	403	1551
ENSDARG00000013279	ENSDART00000022640	22	6	6	ACCTTCAGATGGTGCGCGGTGGTG	6	-	549	1551
ENSDARG00000013279	ENSDART00000022640	22	6	6	GTTCACAGCGGAAACTTCTGTCTGT	7	-	502	1551
ENSDARG00000013279	ENSDART00000022640	22	9	9	GAAGTCTCCATGTGCGGTGCGTTT	6	-	1111	1551
ENSDARG00000013279	ENSDART00000022640	22	9	9	TACGGCTTACAGTGTGTGTGGAC	5	-	1033	1551
ENSDARG00000013279	ENSDART00000022640	22	9	9	CTCACCGTCCTCTGTGGTGTCGAA	6	-	1132	1551
ENSDARG00000013279	ENSDART00000022640	22	9	9	ACCGTCCTCTGTGGTGTCGAAGTC	6	-	1129	1551
ENSDARG00000013279	ENSDART00000022640	22	9	9	ACACTCACCGTCCTCTGTGGTGTC	6	-	1135	1551
ENSDARG00000013279	ENSDART00000022640	22	9	9	AAACTCTTCCCGCAGCCGGGGAC	5	-	976	1551
ENSDARG00000013279	ENSDART00000022640	22	10	10	ACCTGCTGCCCGCCGCTGTGGCTCT	7	-	1316	1551
ENSDARG00000013279	ENSDART00000022640	22	10	10	ACCTGCTGCCCGCCGCTGTGGCT	5	-	1318	1551
ENSDARG00000013279	ENSDART00000022640	22	10	10	GCCCGCCGCTGTGGCTCTGCTGGG	6	-	1310	1551
ENSDARG00000013279	ENSDART00000022640	22	11	11	GCCACCTGCTGGTATGCCGACGAG	6	-	1416	1551
ENSDARG00000013351	ENSDART00000024999	22	2	2	GCATCCTTAGCATCTTCTGGATTT	6	-	171	558
ENSDARG00000013351	ENSDART00000024999	22	3	3	CTCTGCTGCCTCTGAAGAAGCCTCT	7	-	307	558
ENSDARG00000013351	ENSDART00000024999	22	3	3	CTCTTCCTCTGCTGCCTCTGAAGAA	7	-	313	558
ENSDARG00000013351	ENSDART00000024999	22	3	3	TCCCACCTCTTCCTCTGCTGCCTCT	7	-	319	558
ENSDARG00000013351	ENSDART00000024999	22	3	3	TTCCTCTGCTGCCTCTGAAGAAGCC	7	-	310	558
ENSDARG00000013351	ENSDART00000024999	22	4	4	ATCGCCACCGCCATAGCTGCGGTC	6	-	418	558
ENSDARG00000013351	ENSDART00000024999	22	4	4	GTATCCTCCACTCCTGTTGGAGTA	6	-	511	558
ENSDARG00000013351	ENSDART00000105404	22	3	3	GCATCCTTAGCATCTTCTGGATTT	6	-	132	585
ENSDARG00000013351	ENSDART00000105404	22	4	4	CTCTTCCTCTGCTGCCTCTGAAGAA	7	-	274	585
ENSDARG00000013351	ENSDART00000105404	22	4	4	CTCTGCTGCCTCTGAAGAAGCCTCT	7	-	268	585
ENSDARG00000013351	ENSDART00000105404	22	4	4	TCCCACCTCTTCCTCTGCTGCCTCT	7	-	280	585
ENSDARG00000013351	ENSDART00000105404	22	4	4	TTCCTCTGCTGCCTCTGAAGAAGCC	7	-	271	585
ENSDARG00000013351	ENSDART00000105404	22	5	5	GTATCCTCCACTCCTGTTGGAGTA	6	-	472	585
ENSDARG00000013351	ENSDART00000105404	22	5	5	ATCGCCACCGCCATAGCTGCGGTC	6	-	379	585
ENSDARG00000013351	ENSDART00000105405	22	2	2	TCCCTCGTCAGACATGATGATAAC	6	-	52	675
ENSDARG00000013351	ENSDART00000105405	22	3	3	GCATCCTTAGCATCTTCTGGATTT	6	-	222	675
ENSDARG00000013351	ENSDART00000105405	22	4	4	TTCCTCTGCTGCCTCTGAAGAAGCC	7	-	361	675
ENSDARG00000013351	ENSDART00000105405	22	4	4	TCCCACCTCTTCCTCTGCTGCCTCT	7	-	370	675
ENSDARG00000013351	ENSDART00000105405	22	4	4	CTCTTCCTCTGCTGCCTCTGAAGAA	7	-	364	675
ENSDARG00000013351	ENSDART00000105405	22	4	4	CTCTGCTGCCTCTGAAGAAGCCTCT	7	-	358	675
ENSDARG00000013351	ENSDART00000105405	22	5	5	GTATCCTCCACTCCTGTTGGAGTA	6	-	562	675
ENSDARG00000013351	ENSDART00000105405	22	5	5	ATCGCCACCGCCATAGCTGCGGTC	6	-	469	675
ENSDARG00000013351	ENSDART00000105406	22	2	2	GCATCCTTAGCATCTTCTGGATTT	6	-	171	546
ENSDARG00000013351	ENSDART00000105406	22	3	3	TTCCTCTGCTGCCTCTGAAGAAGCC	7	-	310	546
ENSDARG00000013351	ENSDART00000105406	22	3	3	TCCCACCTCTTCCTCTGCTGCCTCT	7	-	319	546
ENSDARG00000013351	ENSDART00000105406	22	3	3	CTCTTCCTCTGCTGCCTCTGAAGAA	7	-	313	546
ENSDARG00000013351	ENSDART00000105406	22	3	3	CTCTGCTGCCTCTGAAGAAGCCTCT	7	-	307	546
ENSDARG00000013351	ENSDART00000105406	22	4	4	GTATCCTCCACTCCTGTTGGAGTA	6	-	433	546
ENSDARG00000013351	ENSDART00000105406	22	4	4	ATCGCCACCGCCATAGCTGCGGTC	6	-	340	546
ENSDARG00000013681	ENSDART00000021541	22	1	1	CAATTCCCACAACAGAATTGTAA	5	-	133	537
ENSDARG00000013681	ENSDART00000021541	22	1	1	AACAAAAAAAGACAAAGACGTGGCT	7	-	34	537
ENSDARG00000013681	ENSDART00000021541	22	2	2	GTTTTCTGCACATTTTGTAGATGCA	7	-	325	537
ENSDARG00000013681	ENSDART00000021541	22	2	2	TTCTGCACATTTTGTAGATGCAGCA	7	-	322	537
ENSDARG00000013681	ENSDART00000105849	22	1	1	AAACCCGCAAACAGGAGCAGAAGAA	7	-	29	783
ENSDARG00000013681	ENSDART00000105849	22	1	1	ACCCGCAAACAGGAGCAGAAGAA	5	-	29	783
ENSDARG00000013681	ENSDART00000105849	22	2	2	CAATTCCCACAACAGAATTGTAA	5	-	139	783
ENSDARG00000013681	ENSDART00000105849	22	3	3	GTTTTCTGCACATTTTGTAGATGCA	7	-	331	783
ENSDARG00000013681	ENSDART00000105849	22	3	3	TTCTGCACATTTTGTAGATGCAGCA	7	-	328	783
ENSDARG00000013681	ENSDART00000105849	22	4	4	ACCAGCTTCCTGATATGGTGGAGGG	7	-	549	783
ENSDARG00000013681	ENSDART00000105849	22	5	5	AAAAGCAGCCTGACTGTAGGGAAC	6	-	589	783
ENSDARG00000013687	ENSDART00000061430	22	1	1	TGCAGCTGCAGATACAGGGGAGGTG	7	+	153	3420
ENSDARG00000013687	ENSDART00000061430	22	1	1	TACCACAGACTGGGTTGCAGCTGCA	7	+	138	3420
ENSDARG00000013687	ENSDART00000061430	22	1	1	AGCTGCAGATACAGGGGAGGTGGTC	7	+	156	3420
ENSDARG00000013687	ENSDART00000061430	22	1	1	AGCTGCAGATACAGGGGAGGTGGT	6	+	156	3420
ENSDARG00000013687	ENSDART00000061430	22	3	3	TGCAGCTACTGTATCTGCGATGGA	6	+	475	3420
ENSDARG00000013687	ENSDART00000061430	22	5	5	CTCAAACCAGAGCAGTCTGGGCA	5	+	925	3420
ENSDARG00000013687	ENSDART00000061430	22	5	5	ACCTCAAACCAGAGCAGTCTGGGCA	7	+	923	3420
ENSDARG00000013687	ENSDART00000061430	22	6	6	AAACACAGCGTTTAGTGGTAAAC	5	+	1427	3420
ENSDARG00000013687	ENSDART00000061430	22	6	6	AACCCAAACATTATTGGTGTGTCT	6	+	2371	3420
ENSDARG00000013687	ENSDART00000061430	22	6	6	GACGTCAAAGTGATGAGGAAGCA	5	+	1528	3420
ENSDARG00000013687	ENSDART00000061430	22	6	6	GAACCCAAACATTATTGGTGTGTCT	7	+	2370	3420
ENSDARG00000013687	ENSDART00000061430	22	6	6	ACCATCCCAACACCTCTGCTGCT	5	+	2834	3420
ENSDARG00000013687	ENSDART00000061430	22	6	6	CAAATCCGCGAGCCTGGGGTCGCT	6	+	2207	3420
ENSDARG00000013687	ENSDART00000061430	22	6	6	ATCCCAACACCTCTGCTGCTTGT	5	+	2837	3420
ENSDARG00000013687	ENSDART00000061430	22	6	6	ACACCATCCCAACACCTCTGCTGCT	7	+	2832	3420
ENSDARG00000013687	ENSDART00000061430	22	6	6	ACCAAACCCTAACAATTTTGATGAA	7	+	2484	3420
ENSDARG00000013687	ENSDART00000061430	22	6	6	AGAAACACAGCGTTTAGTGGTAAAC	7	+	1425	3420
ENSDARG00000013687	ENSDART00000061430	22	6	6	ACCCAAACATTATTGGTGTGTCT	5	+	2372	3420
ENSDARG00000013743	ENSDART00000077515	22	1	1	GCAGCCGGCCATCGCTGGAGACTCT	7	+	119	2715
ENSDARG00000013743	ENSDART00000077515	22	1	1	CTCTGCGCAAAGTCTGCGATGTG	5	+	140	2715
ENSDARG00000013743	ENSDART00000077515	22	1	1	CGCAAAGTCTGCGATGTGAGTCT	5	+	145	2715
ENSDARG00000013743	ENSDART00000077515	22	1	1	AGCACCATCGACGCGATGCCGCA	5	+	52	2715
ENSDARG00000013743	ENSDART00000077515	22	1	1	ACCATCGACGCGATGCCGCATCT	5	+	55	2715
ENSDARG00000013743	ENSDART00000077515	22	3	3	AGAAACAGCAAAGAAGTCTGAGCC	6	+	210	2715
ENSDARG00000013743	ENSDART00000077515	22	5	5	TCCATCACAGCGTTGTCTGTATCT	6	+	382	2715
ENSDARG00000013743	ENSDART00000077515	22	8	8	TCCAGCTACCCCGCAGAAGCAGTC	6	+	753	2715
ENSDARG00000013743	ENSDART00000077515	22	8	8	TCCTTCACCAACTATTTTGTCGGC	6	+	721	2715
ENSDARG00000013743	ENSDART00000077515	22	13	13	AAAAACAGCGAGCCGCTGCGTGC	5	+	1339	2715
ENSDARG00000013743	ENSDART00000077515	22	13	13	TACCCATACATCGGCTTCTTTGGAA	7	+	1303	2715
ENSDARG00000013743	ENSDART00000077515	22	15	15	TTCGGCGCAGCGATTTCTGTGGTG	6	+	1552	2715
ENSDARG00000013743	ENSDART00000077515	22	15	15	TTCCTCCTCACCTGGTGGGCTGCG	6	+	1582	2715
ENSDARG00000013743	ENSDART00000077515	22	15	15	TTCCTCCTCACCTGGTGGGCTGC	5	+	1582	2715
ENSDARG00000013743	ENSDART00000077515	22	17	17	CTCTCAGGCCTCAGTGTCTGGTTCT	7	+	1757	2715
ENSDARG00000013743	ENSDART00000077515	22	17	17	CTCTCAGGCCTCAGTGTCTGGTTC	6	+	1757	2715
ENSDARG00000013743	ENSDART00000077599	22	1	1	CTCTGCGCAAAGTCTGCGATGTG	5	+	128	2910
ENSDARG00000013743	ENSDART00000077599	22	1	1	CGCAAAGTCTGCGATGTGAGTCT	5	+	133	2910
ENSDARG00000013743	ENSDART00000077599	22	1	1	AGCACCATCGACGCGATGCCGCA	5	+	40	2910
ENSDARG00000013743	ENSDART00000077599	22	1	1	ACCATCGACGCGATGCCGCATCT	5	+	43	2910
ENSDARG00000013743	ENSDART00000077599	22	1	1	GCAGCCGGCCATCGCTGGAGACTCT	7	+	107	2910
ENSDARG00000013743	ENSDART00000077599	22	3	3	AGAAACAGCAAAGAAGTCTGAGCC	6	+	195	2910
ENSDARG00000013743	ENSDART00000077599	22	5	5	TCCATCACAGCGTTGTCTGTATCT	6	+	367	2910
ENSDARG00000013743	ENSDART00000077599	22	8	8	TCCTTCACCAACTATTTTGTCGGC	6	+	706	2910
ENSDARG00000013743	ENSDART00000077599	22	8	8	TCCAGCTACCCCGCAGAAGCAGTC	6	+	738	2910
ENSDARG00000013743	ENSDART00000077599	22	13	13	TACCCATACATCGGCTTCTTTGGAA	7	+	1288	2910
ENSDARG00000013743	ENSDART00000077599	22	13	13	AAAAACAGCGAGCCGCTGCGTGC	5	+	1324	2910
ENSDARG00000013743	ENSDART00000077599	22	15	15	TTCCTCCTCACCTGGTGGGCTGC	5	+	1567	2910
ENSDARG00000013743	ENSDART00000077599	22	15	15	TTCCTCCTCACCTGGTGGGCTGCG	6	+	1567	2910
ENSDARG00000013743	ENSDART00000077599	22	15	15	TTCGGCGCAGCGATTTCTGTGGTG	6	+	1537	2910
ENSDARG00000013743	ENSDART00000077599	22	17	17	CTCTCAGGCCTCAGTGTCTGGTTCT	7	+	1742	2910
ENSDARG00000013743	ENSDART00000077599	22	17	17	CTCTCAGGCCTCAGTGTCTGGTTC	6	+	1742	2910
ENSDARG00000013743	ENSDART00000077599	22	27	27	TCCCAACACGCCGCTCTGGTTCT	5	+	2758	2910
ENSDARG00000013743	ENSDART00000077599	22	27	27	TTCCCAACACGCCGCTCTGGTTCT	6	+	2757	2910
ENSDARG00000013743	ENSDART00000077599	22	28	28	CTCCCCGTCCCTCAGGCTGATTGT	6	+	2788	2910
ENSDARG00000013743	ENSDART00000077599	22	28	28	CTCCCCGTCCCTCAGGCTGATTG	5	+	2788	2910
ENSDARG00000013743	ENSDART00000077616	22	1	1	CTCTGCGCAAAGTCTGCGATGTG	5	+	242	3033
ENSDARG00000013743	ENSDART00000077616	22	1	1	CGCAAAGTCTGCGATGTGAGTCT	5	+	247	3033
ENSDARG00000013743	ENSDART00000077616	22	1	1	AGCACCATCGACGCGATGCCGCA	5	+	154	3033
ENSDARG00000013743	ENSDART00000077616	22	1	1	GCAGCCGGCCATCGCTGGAGACTCT	7	+	221	3033
ENSDARG00000013743	ENSDART00000077616	22	1	1	ACCATCGACGCGATGCCGCATCT	5	+	157	3033
ENSDARG00000013743	ENSDART00000077616	22	4	4	AGAAACAGCAAAGAAGTCTGAGCC	6	+	321	3033
ENSDARG00000013743	ENSDART00000077616	22	6	6	TCCATCACAGCGTTGTCTGTATCT	6	+	493	3033
ENSDARG00000013743	ENSDART00000077616	22	9	9	TCCTTCACCAACTATTTTGTCGGC	6	+	832	3033
ENSDARG00000013743	ENSDART00000077616	22	9	9	TCCAGCTACCCCGCAGAAGCAGTC	6	+	864	3033
ENSDARG00000013743	ENSDART00000077616	22	14	14	TACCCATACATCGGCTTCTTTGGAA	7	+	1414	3033
ENSDARG00000013743	ENSDART00000077616	22	14	14	AAAAACAGCGAGCCGCTGCGTGC	5	+	1450	3033
ENSDARG00000013743	ENSDART00000077616	22	16	16	TTCGGCGCAGCGATTTCTGTGGTG	6	+	1663	3033
ENSDARG00000013743	ENSDART00000077616	22	16	16	TTCCTCCTCACCTGGTGGGCTGCG	6	+	1693	3033
ENSDARG00000013743	ENSDART00000077616	22	16	16	TTCCTCCTCACCTGGTGGGCTGC	5	+	1693	3033
ENSDARG00000013743	ENSDART00000077616	22	18	18	CTCTCAGGCCTCAGTGTCTGGTTCT	7	+	1874	3033
ENSDARG00000013743	ENSDART00000077616	22	18	18	CTCTCAGGCCTCAGTGTCTGGTTC	6	+	1874	3033
ENSDARG00000013743	ENSDART00000077616	22	27	27	TCCCAACACGCCGCTCTGGTTCT	5	+	2881	3033
ENSDARG00000013743	ENSDART00000077616	22	27	27	TTCCCAACACGCCGCTCTGGTTCT	6	+	2880	3033
ENSDARG00000013743	ENSDART00000077616	22	28	28	CTCCCCGTCCCTCAGGCTGATTGT	6	+	2911	3033
ENSDARG00000013743	ENSDART00000077616	22	28	28	CTCCCCGTCCCTCAGGCTGATTG	5	+	2911	3033
ENSDARG00000013834	ENSDART00000025482	22	1	1	AGCAGCTGCGGCCGTGGGGTAGGGA	7	+	76	1518
ENSDARG00000013834	ENSDART00000025482	22	1	1	AGCAGCTGCGGCCGTGGGGTAGGG	6	+	76	1518
ENSDARG00000013834	ENSDART00000025482	22	2	2	GAACCCAGCACCAAGCGGGTGAA	5	+	112	1518
ENSDARG00000013834	ENSDART00000025482	22	2	2	CCCAGCACCAAGCGGGTGAAGCC	5	+	115	1518
ENSDARG00000013834	ENSDART00000025482	22	2	2	AACCCAGCACCAAGCGGGTGAAGCC	7	+	113	1518
ENSDARG00000013834	ENSDART00000025482	22	7	7	ACCGCCAGCACCTGGATGAAGCT	5	+	863	1518
ENSDARG00000013834	ENSDART00000025482	22	8	8	ACACACAGACGGGCGAGTCGGAGTG	7	+	920	1518
ENSDARG00000013834	ENSDART00000025482	22	8	8	AACTCAAGAACAACAGAGGCGTTG	6	+	1034	1518
ENSDARG00000013834	ENSDART00000025482	22	9	9	TTAGCCACAATGAGCAGCTGTGGTA	7	+	1106	1518
ENSDARG00000013834	ENSDART00000025482	22	10	10	AGCCACCCCGAAGCCCGCAGATGGA	7	+	1385	1518
ENSDARG00000013845	ENSDART00000028085	22	2	2	AACTGCTCCAGAACGGGACTTTGCT	7	-	155	1995
ENSDARG00000013845	ENSDART00000028085	22	3	3	CGCTCCACATCTCGGTAGAAGAG	5	-	328	1995
ENSDARG00000013845	ENSDART00000028085	22	3	3	AGCAGCGTCACGAATAAGCCGAA	5	-	391	1995
ENSDARG00000013845	ENSDART00000028085	22	5	5	GTTAACTTCTCATGGTAGCGGTC	5	-	565	1995
ENSDARG00000013845	ENSDART00000028085	22	6	6	AAACCCCTCATGAGTGAAGGAGTC	6	-	804	1995
ENSDARG00000013845	ENSDART00000028085	22	8	8	AGAGCCTCCACGTTGTTGGTGTC	5	-	985	1995
ENSDARG00000013845	ENSDART00000028085	22	9	9	TTCACCAGACTGCCTTTGGTGGC	5	-	1030	1995
ENSDARG00000013845	ENSDART00000028085	22	9	9	GCCTTCACCAGACTGCCTTTGGT	5	-	1033	1995
ENSDARG00000013845	ENSDART00000028085	22	10	10	TTCTCCAGAACCTCTGCCGCCTCT	6	-	1224	1995
ENSDARG00000013845	ENSDART00000028085	22	11	11	CTCGTCTCCGCGGTCTTAGCTTTT	6	-	1311	1995
ENSDARG00000013845	ENSDART00000028085	22	12	12	CTCTTCAAACCTACCTCTGCTTTC	6	-	1675	1995
ENSDARG00000013845	ENSDART00000028085	22	12	12	AAACTCGCCGCTTGTGTTTTTTGCT	7	-	1516	1995
ENSDARG00000013845	ENSDART00000028085	22	12	12	AAACTCGCCGCTTGTGTTTTTTGC	6	-	1517	1995
ENSDARG00000013845	ENSDART00000104472	22	3	3	AACTGCTCCAGAACGGGACTTTGCT	7	-	185	930
ENSDARG00000013845	ENSDART00000104472	22	4	4	CAAGACTACTGTTATCTGTGTAGTG	7	-	277	930
ENSDARG00000013845	ENSDART00000104472	22	4	4	CAAGACTACTGTTATCTGTGTAG	5	-	279	930
ENSDARG00000013845	ENSDART00000104472	22	5	5	AGCAGCGTCACGAATAAGCCGAA	5	-	427	930
ENSDARG00000013845	ENSDART00000104472	22	5	5	CGCTCCACATCTCGGTAGAAGAG	5	-	364	930
ENSDARG00000013845	ENSDART00000104472	22	7	7	GTTAACTTCTCATGGTAGCGGTC	5	-	601	930
ENSDARG00000013845	ENSDART00000104472	22	8	8	AAACCCCTCATGAGTGAAGGAGTC	6	-	840	930
ENSDARG00000013928	ENSDART00000006290	22	2	2	AGCGCCGCAAGATGGTGCCTGAGAG	7	-	40	669
ENSDARG00000013928	ENSDART00000006290	22	3	3	GTCGTCTGCACTGTCTGCGCAGAT	6	-	274	669
ENSDARG00000013928	ENSDART00000006290	22	3	3	CCCGACAGACAATCTGCAGGAGCG	6	-	233	669
ENSDARG00000013928	ENSDART00000006290	22	5	5	TCCTCCACAAAACCCATCTGAGGAG	7	-	353	669
ENSDARG00000013928	ENSDART00000006290	22	5	5	CTCCACAAAACCCATCTGAGGAG	5	-	353	669
ENSDARG00000013928	ENSDART00000006290	22	5	5	CACAAATACCTGTGGAGTTGGGTTT	7	-	414	669
ENSDARG00000013928	ENSDART00000006290	22	5	5	CACAAATACCTGTGGAGTTGGGT	5	-	416	669
ENSDARG00000013928	ENSDART00000006290	22	5	5	CACAAAACCCATCTGAGGAGGAGCC	7	-	348	669
ENSDARG00000013928	ENSDART00000006290	22	5	5	CACAAAACCCATCTGAGGAGGAG	5	-	350	669
ENSDARG00000013928	ENSDART00000006290	22	5	5	CAAAACCCATCTGAGGAGGAGCC	5	-	348	669
ENSDARG00000013928	ENSDART00000006290	22	5	5	ACAAAACCCATCTGAGGAGGAGCC	6	-	348	669
ENSDARG00000013928	ENSDART00000006290	22	6	6	TACTGCTGCCCGTCGGCTGAGTA	5	-	496	669
ENSDARG00000013928	ENSDART00000006290	22	6	6	TACTGCTGCCCGTCGGCTGAGTAA	6	-	495	669
ENSDARG00000014171	ENSDART00000013835	22	1	1	AGCTCCTTCCTTTCGTTTTGTTT	5	-	43	375
ENSDARG00000014171	ENSDART00000013835	22	2	2	CTCTTCTTCGTCTTTCTGTAGAT	5	-	63	375
ENSDARG00000014211	ENSDART00000005112	22	1	1	TTACGCACATTTTTGGTGCGTTTAA	7	-	32	1647
ENSDARG00000014211	ENSDART00000005112	22	1	1	TTACGCACATTTTTGGTGCGTTT	5	-	34	1647
ENSDARG00000014211	ENSDART00000005112	22	1	1	TCCAAATTACGCACATTTTTGGTG	6	-	39	1647
ENSDARG00000014211	ENSDART00000005112	22	1	1	AGAAGCGTCTGGTTTGCTGAGCT	5	-	185	1647
ENSDARG00000014211	ENSDART00000005112	22	5	5	GACCTCAGAAGTATTTTATAGGAA	6	-	588	1647
ENSDARG00000014211	ENSDART00000005112	22	5	5	CACATCAGCATACTTAAGCTGAG	5	-	659	1647
ENSDARG00000014211	ENSDART00000005112	22	6	6	TGCTCCTCCTTTTCTCTGCAAAC	5	-	748	1647
ENSDARG00000014211	ENSDART00000005112	22	8	8	AGAAGCGCCACTTGAAGGTTTGGTG	7	-	1074	1647
ENSDARG00000014211	ENSDART00000005112	22	8	8	AAAAGCAGCTCTGGAAGATTTTGAG	7	-	1404	1647
ENSDARG00000014211	ENSDART00000005112	22	8	8	ACCAGCAACATCATCTGCTGAAGCC	7	-	1593	1647
ENSDARG00000014211	ENSDART00000005112	22	8	8	AGAAACAGCACTGGAAGGTTTGGGT	7	-	1296	1647
ENSDARG00000014211	ENSDART00000005112	22	8	8	GGCAGCAGAGGTTTGGAGGCCTTT	6	-	922	1647
ENSDARG00000014211	ENSDART00000005112	22	8	8	GGCAAAAGCAGCTCTGGAAGATTTT	7	-	1407	1647
ENSDARG00000014211	ENSDART00000005112	22	8	8	AGAAGCAGCACTGGAAGATTTGGAG	7	-	1332	1647
ENSDARG00000014211	ENSDART00000005112	22	8	8	AGAAGCAGCTCTGGAAGATTTGGAG	7	-	1368	1647
ENSDARG00000014211	ENSDART00000005112	22	8	8	AGCAACATCATCTGCTGAAGCCTTT	7	-	1590	1647
ENSDARG00000014211	ENSDART00000005112	22	8	8	AGAGGCAGCAGAGGTTTGGAGGC	5	-	926	1647
ENSDARG00000014357	ENSDART00000013803	22	4	4	TTCACCTTAAACTGAAGACGATGGT	7	+	635	1650
ENSDARG00000014357	ENSDART00000013803	22	4	4	ACATTCACCTTAAACTGAAGACGAT	7	+	632	1650
ENSDARG00000014357	ENSDART00000013803	22	6	6	GCCTGCAGACCCACCGGGTGGAGGT	7	+	1058	1650
ENSDARG00000014357	ENSDART00000013803	22	6	6	GACCCCAGCGCAGTTTCTTTGGAT	6	+	919	1650
ENSDARG00000014357	ENSDART00000013803	22	6	6	CTCTTCCACCTCTCCGCCTTGGAG	6	+	953	1650
ENSDARG00000014357	ENSDART00000013803	22	6	6	CTCCACGCCGACTGTATTTGTGTTC	7	+	1017	1650
ENSDARG00000014357	ENSDART00000013803	22	6	6	GTCATCCACAGAGTCGCTGCTTTC	6	+	978	1650
ENSDARG00000014357	ENSDART00000013803	22	6	6	CCCAGCGCAGTTTCTTTGGATAC	5	+	922	1650
ENSDARG00000014357	ENSDART00000013803	22	6	6	TTCCTCCACGCCGACTGTATTTGTG	7	+	1014	1650
ENSDARG00000014357	ENSDART00000013803	22	6	6	GCAGACCCACCGGGTGGAGGTGAC	6	+	1062	1650
ENSDARG00000014357	ENSDART00000013803	22	7	7	GCCAACATCAACAACTGCGAAGGA	6	+	1438	1650
ENSDARG00000014357	ENSDART00000013803	22	7	7	GAATACGACGATCTGTGTGTGATTG	7	+	1567	1650
ENSDARG00000014357	ENSDART00000013803	22	7	7	CTATGCTGCGTCCCTGTGGAATAC	6	+	1549	1650
ENSDARG00000014357	ENSDART00000013803	22	7	7	CTACAAGACCAACGTGGTGGCGAC	6	+	1620	1650
ENSDARG00000014357	ENSDART00000013803	22	7	7	ACATCCAGAGCGGGCAGCCGGTGAA	7	+	1517	1650
ENSDARG00000014408	ENSDART00000032720	22	1	1	TGCTCCTGCTGGTTTCTCTGGTGCC	7	+	47	744
ENSDARG00000014408	ENSDART00000032720	22	2	2	AAAAACAGCAGGCATAGCTGTGGTG	7	+	157	744
ENSDARG00000014408	ENSDART00000046394	22	1	1	TGCTCCTGCTGGTTTCTCTGGTGCC	7	+	53	774
ENSDARG00000014408	ENSDART00000046394	22	2	2	AAAAACAGCAGGCATAGCTGTGGTG	7	+	163	774
ENSDARG00000014623	ENSDART00000020416	22	1	1	GTCTGCTGCTACTGCTGCGTTGCT	6	+	41	729
ENSDARG00000014623	ENSDART00000020416	22	1	1	CTAGTCTGCTGCTACTGCTGCGTTG	7	+	38	729
ENSDARG00000014623	ENSDART00000020416	22	1	1	TGCTGCTACTGCTGCGTTGCTGTG	6	+	44	729
ENSDARG00000014623	ENSDART00000020416	22	2	2	AAATTCAAAATTAGCATGTGGCGGT	7	+	162	729
ENSDARG00000014623	ENSDART00000020416	22	3	3	TCCCAATAAGTTTGATGTGTGGGC	6	+	231	729
ENSDARG00000014623	ENSDART00000020416	22	3	3	TCCCAATAAGTTTGATGTGTGGGCC	7	+	231	729
ENSDARG00000014623	ENSDART00000020416	22	4	4	ACATCATGCTTCTAAAGGTGGTTCT	7	+	350	729
ENSDARG00000014623	ENSDART00000020416	22	4	4	GTCATCTAAAGGTCTATTTGGGGGT	7	+	245	729
ENSDARG00000014623	ENSDART00000020416	22	5	5	AAAGACTGCATGGTCTTGGGTTGGG	7	+	442	729
ENSDARG00000014623	ENSDART00000020416	22	6	6	TTACACAGAGTCATCTGGAGTATAC	7	+	651	729
ENSDARG00000014623	ENSDART00000020416	22	6	6	TGCTGCACAGGGAATTGTGTCTTT	6	+	627	729
ENSDARG00000014623	ENSDART00000020416	22	6	6	AGATGCTGCACAGGGAATTGTGT	5	+	624	729
ENSDARG00000014623	ENSDART00000061440	22	1	1	TGCTGCTACTGCTGCGTTGCTGTG	6	+	16	726
ENSDARG00000014623	ENSDART00000061440	22	1	1	CTAGTCTGCTGCTACTGCTGCGTTG	7	+	10	726
ENSDARG00000014623	ENSDART00000061440	22	1	1	GTCTGCTGCTACTGCTGCGTTGCT	6	+	13	726
ENSDARG00000014623	ENSDART00000061440	22	2	2	AAATTCAAAATTAGCATGTGGCGGT	7	+	162	726
ENSDARG00000014623	ENSDART00000061440	22	3	3	ACATCATGCTTCTAAAGGTGGTTCT	7	+	347	726
ENSDARG00000014623	ENSDART00000061440	22	3	3	GTCATCTAAAGGTCTATTTGGGGGT	7	+	242	726
ENSDARG00000014623	ENSDART00000061440	22	4	4	AAAGACTGCATGGTCTTGGGTTGGG	7	+	439	726
ENSDARG00000014623	ENSDART00000061440	22	5	5	TTACACAGAGTCATCTGGAGTATAC	7	+	648	726
ENSDARG00000014623	ENSDART00000061440	22	5	5	TGCTGCACAGGGAATTGTGTCTTT	6	+	624	726
ENSDARG00000014623	ENSDART00000061440	22	5	5	AGATGCTGCACAGGGAATTGTGT	5	+	621	726
ENSDARG00000014623	ENSDART00000078553	22	2	2	AAATTCAAAATTAGCATGTGGCGGT	7	+	156	726
ENSDARG00000014623	ENSDART00000078553	22	5	5	ACATCATGCTTCTAAAGGTGGTTCT	7	+	347	726
ENSDARG00000014623	ENSDART00000078553	22	6	6	AAAGACTGCATGGTCTTGGGTTGGG	7	+	439	726
ENSDARG00000014623	ENSDART00000078553	22	7	7	AGATGCTGCACAGGGAATTGTGT	5	+	621	726
ENSDARG00000014623	ENSDART00000078553	22	7	7	TGCTGCACAGGGAATTGTGTCTTT	6	+	624	726
ENSDARG00000014623	ENSDART00000078553	22	7	7	TTACACAGAGTCATCTGGAGTATAC	7	+	648	726
ENSDARG00000014623	ENSDART00000105411	22	1	1	CTAGTCTGCTGCTACTGCTGCGTTG	7	+	1	732
ENSDARG00000014623	ENSDART00000105411	22	1	1	GTCTGCTGCTACTGCTGCGTTGCT	6	+	4	732
ENSDARG00000014623	ENSDART00000105411	22	1	1	TGCTGCTACTGCTGCGTTGCTGTG	6	+	7	732
ENSDARG00000014623	ENSDART00000105411	22	2	2	AAATTCAAAATTAGCATGTGGCGGT	7	+	168	732
ENSDARG00000014623	ENSDART00000105411	22	5	5	AAATTCCCAATAAGTTTGATGTG	5	+	284	732
ENSDARG00000014623	ENSDART00000105411	22	5	5	TCCCAATAAGTTTGATGTGTGGGCC	7	+	288	732
ENSDARG00000014623	ENSDART00000105411	22	5	5	TCCCAATAAGTTTGATGTGTGGGC	6	+	288	732
ENSDARG00000014623	ENSDART00000105411	22	6	6	ACATCATGCTTCTAAAGGTGGTTCT	7	+	353	732
ENSDARG00000014623	ENSDART00000105411	22	7	7	AAAGACTGCATGGTCTTGGGTTGGG	7	+	445	732
ENSDARG00000014623	ENSDART00000105411	22	8	8	AGATGCTGCACAGGGAATTGTGT	5	+	627	732
ENSDARG00000014623	ENSDART00000105411	22	8	8	TGCTGCACAGGGAATTGTGTCTTT	6	+	630	732
ENSDARG00000014623	ENSDART00000105411	22	8	8	TTACACAGAGTCATCTGGAGTATAC	7	+	654	732
ENSDARG00000014623	ENSDART00000105413	22	1	1	GTCTGCTGCTACTGCTGCGTTGCT	6	+	35	726
ENSDARG00000014623	ENSDART00000105413	22	1	1	CTAGTCTGCTGCTACTGCTGCGTTG	7	+	32	726
ENSDARG00000014623	ENSDART00000105413	22	1	1	TGCTGCTACTGCTGCGTTGCTGTG	6	+	38	726
ENSDARG00000014623	ENSDART00000105413	22	2	2	AAATTCAAAATTAGCATGTGGCGGT	7	+	156	726
ENSDARG00000014623	ENSDART00000105413	22	6	6	AAATTCCCAATAAGTTTGATGTG	5	+	278	726
ENSDARG00000014623	ENSDART00000105413	22	6	6	TCCCAATAAGTTTGATGTGTGGGC	6	+	282	726
ENSDARG00000014623	ENSDART00000105413	22	6	6	TCCCAATAAGTTTGATGTGTGGGCC	7	+	282	726
ENSDARG00000014623	ENSDART00000105413	22	6	6	TTAAAATTCCCAATAAGTTTGATGT	7	+	275	726
ENSDARG00000014623	ENSDART00000105413	22	7	7	ACATCATGCTTCTAAAGGTGGTTCT	7	+	347	726
ENSDARG00000014623	ENSDART00000105413	22	8	8	AAAGACTGCATGGTCTTGGGTTGGG	7	+	439	726
ENSDARG00000014623	ENSDART00000105413	22	9	9	TTACACAGAGTCATCTGGAGTATAC	7	+	648	726
ENSDARG00000014623	ENSDART00000105413	22	9	9	TGCTGCACAGGGAATTGTGTCTTT	6	+	624	726
ENSDARG00000014623	ENSDART00000105413	22	9	9	AGATGCTGCACAGGGAATTGTGT	5	+	621	726
ENSDARG00000014623	ENSDART00000105415	22	1	1	GTCTGCTGCTACTGCTGCGTTGCT	6	+	50	777
ENSDARG00000014623	ENSDART00000105415	22	1	1	CTAGTCTGCTGCTACTGCTGCGTTG	7	+	47	777
ENSDARG00000014623	ENSDART00000105415	22	1	1	TGCTGCTACTGCTGCGTTGCTGTG	6	+	53	777
ENSDARG00000014623	ENSDART00000105415	22	2	2	AAATTCAAAATTAGCATGTGGCGGT	7	+	165	777
ENSDARG00000014623	ENSDART00000105415	22	4	4	ACATCATGCTTCTAAAGGTGGTTCT	7	+	350	777
ENSDARG00000014623	ENSDART00000105415	22	4	4	GTCATCTAAAGGTCTATTTGGGGGT	7	+	245	777
ENSDARG00000014623	ENSDART00000105415	22	5	5	AAAGACTGCATGGTCTTGGGTTGGG	7	+	442	777
ENSDARG00000014623	ENSDART00000105415	22	6	6	TTACACAGAGTCATCTGGAGTATAC	7	+	651	777
ENSDARG00000014623	ENSDART00000105415	22	6	6	TGCTGCACAGGGAATTGTGTCTTT	6	+	627	777
ENSDARG00000014623	ENSDART00000105415	22	6	6	AGATGCTGCACAGGGAATTGTGT	5	+	624	777
ENSDARG00000014623	ENSDART00000105416	22	1	1	CTAGTCTGCTGCTACTGCTGCGTTG	7	+	53	792
ENSDARG00000014623	ENSDART00000105416	22	1	1	GTCTGCTGCTACTGCTGCGTTGCT	6	+	56	792
ENSDARG00000014623	ENSDART00000105416	22	1	1	TGCTGCTACTGCTGCGTTGCTGTG	6	+	59	792
ENSDARG00000014623	ENSDART00000105416	22	2	2	AAATTCAAAATTAGCATGTGGCGGT	7	+	177	792
ENSDARG00000014623	ENSDART00000105416	22	4	4	ACATCATGCTTCTAAAGGTGGTTCT	7	+	365	792
ENSDARG00000014623	ENSDART00000105416	22	5	5	AAAGACTGCATGGTCTTGGGTTGGG	7	+	457	792
ENSDARG00000014623	ENSDART00000105416	22	6	6	TTACACAGAGTCATCTGGAGTATAC	7	+	666	792
ENSDARG00000014623	ENSDART00000105416	22	6	6	TGCTGCACAGGGAATTGTGTCTTT	6	+	642	792
ENSDARG00000014623	ENSDART00000105416	22	6	6	AGATGCTGCACAGGGAATTGTGT	5	+	639	792
ENSDARG00000014775	ENSDART00000035562	22	4	2	AACTCAGTCAAAGTCTGAAGACGGT	7	+	420	1491
ENSDARG00000014775	ENSDART00000035562	22	5	3	TGCGACAAAACATTTTTGAAGCC	5	+	574	1491
ENSDARG00000014775	ENSDART00000035562	22	5	3	TACTCATGCGCTGAGTGTGGGAA	5	+	643	1491
ENSDARG00000014775	ENSDART00000035562	22	5	3	GACAAAACATTTTTGAAGCCTTC	5	+	577	1491
ENSDARG00000014775	ENSDART00000035562	22	5	3	GAATCACACTGAAGAGAAGCCGGA	6	+	957	1491
ENSDARG00000014775	ENSDART00000035562	22	5	3	GAAGCCTTATTCCTGCGCCGAGTGT	7	+	1224	1491
ENSDARG00000014775	ENSDART00000035562	22	5	3	AGATTCACACTGGAGAGATGGCGAA	7	+	1460	1491
ENSDARG00000014898	ENSDART00000008365	22	1	1	CACATCAACATAGGAGTCGCTGAA	6	-	34	465
ENSDARG00000014898	ENSDART00000008365	22	2	2	ACCTGCTCCTCTGTGGTGTAGAA	5	-	151	465
ENSDARG00000014898	ENSDART00000008365	22	2	2	TGCACCTGCTCCTCTGTGGTGTAG	6	-	153	465
ENSDARG00000014898	ENSDART00000008365	22	2	2	TGCACCTGCTCCTCTGTGGTGTA	5	-	154	465
ENSDARG00000014898	ENSDART00000008365	22	2	2	GCAGTCTTCTTGATTTTGTCGAG	5	-	223	465
ENSDARG00000014898	ENSDART00000008365	22	2	2	GACGTCTCCACACTTGGCGAAGAG	6	-	181	465
ENSDARG00000014898	ENSDART00000008365	22	3	3	GTCCCAGTCTGTTCTGATGATGCG	6	-	331	465
ENSDARG00000014898	ENSDART00000008365	22	3	3	TGCGTCCCAGTCTGTTCTGATGAT	6	-	334	465
ENSDARG00000014898	ENSDART00000008365	22	4	4	TTCCCATAACCCCCTCTGGCGGG	5	-	436	465
ENSDARG00000014995	ENSDART00000005883	22	2	1	TACCTCATCTGATAGTGTGACGCG	6	-	78	549
ENSDARG00000014995	ENSDART00000005883	22	3	2	GTATTCCCACTGGTATGGAGAGGCC	7	-	213	549
ENSDARG00000014995	ENSDART00000005883	22	3	2	GAAACCAGACCACTGCATGAGCG	5	-	135	549
ENSDARG00000014995	ENSDART00000005883	22	3	2	AACCTATAAGCTTTGCCGTGGCG	5	-	400	549
ENSDARG00000014995	ENSDART00000007791	22	1	1	TACCTCATCTGATAGTGTGACGCG	6	-	78	402
ENSDARG00000014995	ENSDART00000007791	22	2	2	GAAACCAGACCACTGCATGAGCG	5	-	135	402
ENSDARG00000014995	ENSDART00000007791	22	3	3	AACCTATAAGCTTTGCCGTGGCG	5	-	395	402
ENSDARG00000015123	ENSDART00000012686	22	3	3	ACCTCAAGAATAACGATGATGTC	5	-	166	870
ENSDARG00000015123	ENSDART00000012686	22	4	4	TTCCTCTTCCCAGGCGTGTGCTGAG	7	-	271	870
ENSDARG00000015123	ENSDART00000012686	22	8	8	ATCTTCCTCTGTCAAGCTGAAGGC	6	-	784	870
ENSDARG00000015273	ENSDART00000015016	22	2	2	ATCCTCTTCGTTGGTGATGGTGAG	6	+	202	1596
ENSDARG00000015273	ENSDART00000015016	22	2	2	AACATCATCCTCTTCGTTGGTGAT	6	+	196	1596
ENSDARG00000015273	ENSDART00000015016	22	2	2	ACATCATCCTCTTCGTTGGTGAT	5	+	197	1596
ENSDARG00000015273	ENSDART00000015016	22	2	2	ATCATCCTCTTCGTTGGTGATGGT	6	+	199	1596
ENSDARG00000015273	ENSDART00000015016	22	4	4	AGCTACAGCGTATCACTGCGGAGTG	7	+	378	1596
ENSDARG00000015273	ENSDART00000015016	22	4	4	TGCCAAGACGGTGGGCTTGAGTG	5	+	411	1596
ENSDARG00000015273	ENSDART00000015016	22	4	4	GAAGGCTAATGCCAAGACGGTGGG	6	+	402	1596
ENSDARG00000015273	ENSDART00000015016	22	5	5	GCCGGCTGCTGCGTATGCGCATTC	6	+	558	1596
ENSDARG00000015273	ENSDART00000015016	22	5	5	GACATCGCCACACAGCTGGTGAC	5	+	646	1596
ENSDARG00000015273	ENSDART00000015016	22	5	5	CGCGTCGCCGGCTGCTGCGTATGC	6	+	552	1596
ENSDARG00000015273	ENSDART00000015016	22	7	7	AGAAACGCCCAGTACGTTTGGAAC	6	+	820	1596
ENSDARG00000015273	ENSDART00000015016	22	7	7	AACAACAGACTGCCTGATGGGTAA	6	+	873	1596
ENSDARG00000015273	ENSDART00000015016	22	8	8	GCCCAAAGATATGAGATTTGAGGTG	7	+	903	1596
ENSDARG00000015273	ENSDART00000015016	22	11	11	CTAACCGGCGTGTTTTGGCTTGTTT	7	+	1576	1596
ENSDARG00000015273	ENSDART00000104458	22	1	1	CACTCCTTCCAGCCGTCGAGGTG	5	+	14	1728
ENSDARG00000015273	ENSDART00000104458	22	1	1	AGACACTCCTTCCAGCCGTCGAG	5	+	11	1728
ENSDARG00000015273	ENSDART00000104458	22	2	2	ACATCATCCTCTTCGTTGGTGAT	5	+	251	1728
ENSDARG00000015273	ENSDART00000104458	22	2	2	ATCATCCTCTTCGTTGGTGATGGT	6	+	253	1728
ENSDARG00000015273	ENSDART00000104458	22	2	2	ATCCTCTTCGTTGGTGATGGTGAG	6	+	256	1728
ENSDARG00000015273	ENSDART00000104458	22	2	2	AACATCATCCTCTTCGTTGGTGAT	6	+	250	1728
ENSDARG00000015273	ENSDART00000104458	22	4	4	GAAGGCTAATGCCAAGACGGTGGG	6	+	456	1728
ENSDARG00000015273	ENSDART00000104458	22	4	4	TGCCAAGACGGTGGGCTTGAGTG	5	+	465	1728
ENSDARG00000015273	ENSDART00000104458	22	4	4	AGCTACAGCGTATCACTGCGGAGTG	7	+	432	1728
ENSDARG00000015273	ENSDART00000104458	22	5	5	GACATCGCCACACAGCTGGTGAC	5	+	700	1728
ENSDARG00000015273	ENSDART00000104458	22	5	5	CGCGTCGCCGGCTGCTGCGTATGC	6	+	606	1728
ENSDARG00000015273	ENSDART00000104458	22	5	5	GCCGGCTGCTGCGTATGCGCATTC	6	+	612	1728
ENSDARG00000015273	ENSDART00000104458	22	7	7	AGAAACGCCCAGTACGTTTGGAAC	6	+	874	1728
ENSDARG00000015273	ENSDART00000104458	22	7	7	AACAACAGACTGCCTGATGGGTAA	6	+	927	1728
ENSDARG00000015273	ENSDART00000104458	22	8	8	AACAGCAGAACATGTTTGTGTTC	5	+	1134	1728
ENSDARG00000015273	ENSDART00000104458	22	8	8	GCCCAAAGATATGAGATTTGAGGTG	7	+	957	1728
ENSDARG00000015273	ENSDART00000104458	22	10	10	CTAACCGGCGTGTTTTGGCTTGTTT	7	+	1708	1728
ENSDARG00000015749	ENSDART00000015103	22	1	1	AAACGCCTCTATCTTGCAGCCGCC	6	-	250	3126
ENSDARG00000015749	ENSDART00000015103	22	1	1	TACAGCTCCGGGACCGGCGGTAGCT	7	-	111	3126
ENSDARG00000015749	ENSDART00000015103	22	1	1	AACAGCGCCCCGCCGCCGCAGCA	5	-	214	3126
ENSDARG00000015749	ENSDART00000015103	22	1	1	ACCCACGGCGCTGTGTTGCAGGC	5	-	335	3126
ENSDARG00000015749	ENSDART00000015103	22	2	2	AGCGGCGGCTCAAACAGCGGGATTT	7	-	530	3126
ENSDARG00000015749	ENSDART00000015103	22	2	2	GCAGGCCACACACAGCGGCGGCT	5	-	545	3126
ENSDARG00000015749	ENSDART00000015103	22	3	3	AGCACCTCCAGCTCTGTCTGCAGGG	7	-	740	3126
ENSDARG00000015749	ENSDART00000015103	22	3	3	ACCAGCACCTCCAGCTCTGTCTGC	6	-	744	3126
ENSDARG00000015749	ENSDART00000015103	22	3	3	ACCTGCATCGTCCTCTAAGCTGGT	6	-	847	3126
ENSDARG00000015749	ENSDART00000015103	22	4	4	AACCCAGCATCTCCTGGTGCTTAG	6	-	926	3126
ENSDARG00000015749	ENSDART00000015103	22	4	4	GAACCCAGCATCTCCTGGTGCTTAG	7	-	926	3126
ENSDARG00000015749	ENSDART00000015103	22	4	4	CCCAGCATCTCCTGGTGCTTAGGAA	7	-	923	3126
ENSDARG00000015749	ENSDART00000015103	22	5	5	CTCCTCTACGCTGCAGCCTTGGAA	6	-	1066	3126
ENSDARG00000015749	ENSDART00000015103	22	6	6	CCCCACATCTGGAGATGGAGGATTC	7	-	1141	3126
ENSDARG00000015749	ENSDART00000015103	22	6	6	CTAAGCACAGCCTGGTGGGCCTTT	6	-	1266	3126
ENSDARG00000015749	ENSDART00000015103	22	6	6	ACAATCTACCTGGTGATGACGTA	5	-	1303	3126
ENSDARG00000015749	ENSDART00000015103	22	7	7	GTTACCTTCATGGTGGTGTCGAT	5	-	1381	3126
ENSDARG00000015749	ENSDART00000015103	22	7	7	TGCTACTGCACTGCATCTGACGGT	6	-	1336	3126
ENSDARG00000015749	ENSDART00000015103	22	9	9	GTCGACTTACAGACCGACGACTTT	6	-	1560	3126
ENSDARG00000015749	ENSDART00000015103	22	10	10	TCCTCAGCAGGGCCGTTCTGCAGTT	7	-	1748	3126
ENSDARG00000015749	ENSDART00000015103	22	10	10	TTAAGCAGCGCTGACCGCAGAAGAA	7	-	1724	3126
ENSDARG00000015749	ENSDART00000015103	22	11	11	ATCCTCGGCCGTAACCGCTTGATAC	7	-	1933	3126
ENSDARG00000015749	ENSDART00000015103	22	11	11	GAATGCTTCAGGAAGAAGATGAA	5	-	1957	3126
ENSDARG00000015749	ENSDART00000015103	22	12	12	CTCTACAGAGGGCCAGGGTGATGGA	7	-	2158	3126
ENSDARG00000015749	ENSDART00000015103	22	12	12	GCACACAACATGAGGAAGCTGAG	5	-	2060	3126
ENSDARG00000015749	ENSDART00000015103	22	12	12	AACAGCACACAACATGAGGAAGCT	6	-	2063	3126
ENSDARG00000015749	ENSDART00000015103	22	13	13	CACCTCTACCATGCAGGAGCAGTC	6	-	2282	3126
ENSDARG00000015749	ENSDART00000015103	22	13	13	CTACCATGCAGGAGCAGTCGGGGCT	7	-	2276	3126
ENSDARG00000015749	ENSDART00000015103	22	14	14	AACAGCAGCTCCTGGATGGTGGA	5	-	2524	3126
ENSDARG00000015749	ENSDART00000015103	22	14	14	TGCAGCCGCTGGGATGGCTGCATGT	7	-	2578	3126
ENSDARG00000015749	ENSDART00000015103	22	15	15	ATCCCATAATGAGAGCAGGAGTT	5	-	2632	3126
ENSDARG00000015749	ENSDART00000015103	22	16	16	GACAGCGGCTCCAGCAGAGGCAGAA	7	-	2765	3126
ENSDARG00000015749	ENSDART00000015103	22	16	16	AGCGGCTCCAGCAGAGGCAGAATAG	7	-	2762	3126
ENSDARG00000015749	ENSDART00000015103	22	18	18	AAATCCAGAAACTCTAATGGGGT	5	-	3055	3126
ENSDARG00000015749	ENSDART00000059690	22	1	1	AAACGCCTCTATCTTGCAGCCGCC	6	-	121	1575
ENSDARG00000015749	ENSDART00000059690	22	1	1	AACAGCGCCCCGCCGCCGCAGCA	5	-	85	1575
ENSDARG00000015749	ENSDART00000059690	22	1	1	ACCCACGGCGCTGTGTTGCAGGC	5	-	206	1575
ENSDARG00000015749	ENSDART00000059690	22	2	2	AGCGGCGGCTCAAACAGCGGGATTT	7	-	401	1575
ENSDARG00000015749	ENSDART00000059690	22	2	2	GCAGGCCACACACAGCGGCGGCT	5	-	416	1575
ENSDARG00000015749	ENSDART00000059690	22	3	3	AGCACCTCCAGCTCTGTCTGCAGGG	7	-	611	1575
ENSDARG00000015749	ENSDART00000059690	22	3	3	ACCTGCATCGTCCTCTAAGCTGGT	6	-	718	1575
ENSDARG00000015749	ENSDART00000059690	22	3	3	ACCAGCACCTCCAGCTCTGTCTGC	6	-	615	1575
ENSDARG00000015749	ENSDART00000059690	22	4	4	AACCCAGCATCTCCTGGTGCTTAG	6	-	797	1575
ENSDARG00000015749	ENSDART00000059690	22	4	4	CCCAGCATCTCCTGGTGCTTAGGAA	7	-	794	1575
ENSDARG00000015749	ENSDART00000059690	22	4	4	GAACCCAGCATCTCCTGGTGCTTAG	7	-	797	1575
ENSDARG00000015749	ENSDART00000059690	22	5	5	CTCCTCTACGCTGCAGCCTTGGAA	6	-	937	1575
ENSDARG00000015749	ENSDART00000059690	22	6	6	CTAAGCACAGCCTGGTGGGCCTTT	6	-	1137	1575
ENSDARG00000015749	ENSDART00000059690	22	6	6	CCCCACATCTGGAGATGGAGGATTC	7	-	1012	1575
ENSDARG00000015749	ENSDART00000059690	22	6	6	ACAATCTACCTGGTGATGACGTA	5	-	1174	1575
ENSDARG00000015749	ENSDART00000059690	22	7	7	GTTACCTTCATGGTGGTGTCGAT	5	-	1252	1575
ENSDARG00000015749	ENSDART00000059690	22	7	7	TGCTACTGCACTGCATCTGACGGT	6	-	1207	1575
ENSDARG00000015911	ENSDART00000006598	22	2	2	GACTCATCCTCAAATGGAGGAAGGT	7	-	95	2625
ENSDARG00000015911	ENSDART00000006598	22	2	2	ATCCTCCTCATCAGGAAGAGTGT	5	-	137	2625
ENSDARG00000015911	ENSDART00000006598	22	2	2	CTCATCCTCAAATGGAGGAAGGT	5	-	95	2625
ENSDARG00000015911	ENSDART00000006598	22	3	3	TGCCAAGGCCTTGTTCTCTGTCGCG	7	-	316	2625
ENSDARG00000015911	ENSDART00000006598	22	3	3	TGCGGCCCATGCCAAGGCCTTGTTC	7	-	325	2625
ENSDARG00000015911	ENSDART00000006598	22	3	3	CGCGTCTCCTCATCGCCGCTTCT	5	-	297	2625
ENSDARG00000015911	ENSDART00000006598	22	4	4	CGCTGCCTCTTCGTAGGCCGTTTGT	7	-	389	2625
ENSDARG00000015911	ENSDART00000006598	22	6	6	CTCATCCACGTGCGTGCGCAGGA	5	-	566	2625
ENSDARG00000015911	ENSDART00000006598	22	6	6	TGCTCATCCACGTGCGTGCGCAGGA	7	-	566	2625
ENSDARG00000015911	ENSDART00000006598	22	7	7	AAACTCTCCTTATTTTCTGTAGTG	6	-	627	2625
ENSDARG00000015911	ENSDART00000006598	22	9	9	CTCCTCCACCAATGGTAGGTTAC	5	-	809	2625
ENSDARG00000015911	ENSDART00000006598	22	9	9	ATCTTCAGCATTTCGGCAGGAGCT	6	-	702	2625
ENSDARG00000015911	ENSDART00000006598	22	9	9	AGCTCCTCCACCAATGGTAGGTTAC	7	-	809	2625
ENSDARG00000015911	ENSDART00000006598	22	9	9	AGCTCCTCCACCAATGGTAGGTT	5	-	811	2625
ENSDARG00000015911	ENSDART00000006598	22	12	12	CGCCAATGCGCTCGTCTTTGGAC	5	-	1332	2625
ENSDARG00000015911	ENSDART00000006598	22	12	12	AGAGCCGTCATAGTTGTTGTGGTA	6	-	1183	2625
ENSDARG00000015911	ENSDART00000006598	22	14	14	AGCGTCCACTCTCGGCTGACGGG	5	-	1621	2625
ENSDARG00000015911	ENSDART00000006598	22	14	14	GCCGTCAGACCCACAGCGGAGGCT	6	-	1581	2625
ENSDARG00000015911	ENSDART00000006598	22	15	15	TGCTCCATCGCCTCGTGGATGCT	5	-	1726	2625
ENSDARG00000015911	ENSDART00000006598	22	15	15	GGCGGCAGCGATGACGGTGCAGCG	6	-	1798	2625
ENSDARG00000015911	ENSDART00000006598	22	15	15	TCCATCGCCTCGTGGATGCTGGT	5	-	1723	2625
ENSDARG00000015911	ENSDART00000006598	22	17	17	GCCTCACGCGCTCTTTAGCGTAA	5	-	2097	2625
ENSDARG00000015911	ENSDART00000006598	22	17	17	GCCCCCTTCTTTGTTGCTAGGGT	5	-	1991	2625
ENSDARG00000015911	ENSDART00000006598	22	17	17	AGCCACGCCCCCTTCTTTGTTGCT	6	-	1996	2625
ENSDARG00000015911	ENSDART00000006598	22	18	18	GTCGTCCTCCAGCACGTAGTCGCG	6	-	2269	2625
ENSDARG00000015911	ENSDART00000006598	22	18	18	CTCATCACACTGAACTTCTGCGTGT	7	-	2333	2625
ENSDARG00000015911	ENSDART00000006598	22	18	18	AACTTCTGCGTGTCGATGAAGCT	5	-	2323	2625
ENSDARG00000015911	ENSDART00000006598	22	20	20	AAACGCAGACAGGCTGTGGATGT	5	-	2540	2625
ENSDARG00000015911	ENSDART00000006598	22	20	20	AAACGCAGACAGGCTGTGGATGTT	6	-	2539	2625
ENSDARG00000015911	ENSDART00000006598	22	20	20	GTAAAACGCAGACAGGCTGTGGAT	6	-	2542	2625
ENSDARG00000015911	ENSDART00000049626	22	2	2	ATCCTCCTCATCAGGAAGAGTGT	5	-	140	2667
ENSDARG00000015911	ENSDART00000049626	22	2	2	CTCATCCTCAAATGGAGGAAGGT	5	-	98	2667
ENSDARG00000015911	ENSDART00000049626	22	2	2	GACTCATCCTCAAATGGAGGAAGGT	7	-	98	2667
ENSDARG00000015911	ENSDART00000049626	22	3	3	CGCGTCTCCTCATCGCCGCTTCT	5	-	300	2667
ENSDARG00000015911	ENSDART00000049626	22	3	3	TGCCAAGGCCTTGTTCTCTGTCGCG	7	-	319	2667
ENSDARG00000015911	ENSDART00000049626	22	3	3	TGCGGCCCATGCCAAGGCCTTGTTC	7	-	328	2667
ENSDARG00000015911	ENSDART00000049626	22	4	4	CGCTGCCTCTTCGTAGGCCGTTTGT	7	-	392	2667
ENSDARG00000015911	ENSDART00000049626	22	4	4	TGCTCATCCACGTGCGTGCGCAGGA	7	-	578	2667
ENSDARG00000015911	ENSDART00000049626	22	4	4	CTCATCCACGTGCGTGCGCAGGA	5	-	578	2667
ENSDARG00000015911	ENSDART00000049626	22	5	5	CTCCTCCACCAATGGTAGGTTAC	5	-	830	2667
ENSDARG00000015911	ENSDART00000049626	22	5	5	ATCTTCAGCATTTCGGCAGGAGCT	6	-	723	2667
ENSDARG00000015911	ENSDART00000049626	22	5	5	AGCTCCTCCACCAATGGTAGGTTAC	7	-	830	2667
ENSDARG00000015911	ENSDART00000049626	22	5	5	AGCTCCTCCACCAATGGTAGGTT	5	-	832	2667
ENSDARG00000015911	ENSDART00000049626	22	5	5	AAACTCTCCTTATTTTCTGTAGTG	6	-	639	2667
ENSDARG00000015911	ENSDART00000049626	22	8	8	CGCCAATGCGCTCGTCTTTGGAC	5	-	1374	2667
ENSDARG00000015911	ENSDART00000049626	22	8	8	AGAGCCGTCATAGTTGTTGTGGTA	6	-	1225	2667
ENSDARG00000015911	ENSDART00000049626	22	10	10	AGCGTCCACTCTCGGCTGACGGG	5	-	1663	2667
ENSDARG00000015911	ENSDART00000049626	22	10	10	GCCGTCAGACCCACAGCGGAGGCT	6	-	1623	2667
ENSDARG00000015911	ENSDART00000049626	22	11	11	TGCTCCATCGCCTCGTGGATGCT	5	-	1768	2667
ENSDARG00000015911	ENSDART00000049626	22	11	11	GGCGGCAGCGATGACGGTGCAGCG	6	-	1840	2667
ENSDARG00000015911	ENSDART00000049626	22	11	11	TCCATCGCCTCGTGGATGCTGGT	5	-	1765	2667
ENSDARG00000015911	ENSDART00000049626	22	13	13	AGCCACGCCCCCTTCTTTGTTGCT	6	-	2038	2667
ENSDARG00000015911	ENSDART00000049626	22	13	13	GCCCCCTTCTTTGTTGCTAGGGT	5	-	2033	2667
ENSDARG00000015911	ENSDART00000049626	22	13	13	GCCTCACGCGCTCTTTAGCGTAA	5	-	2139	2667
ENSDARG00000015911	ENSDART00000049626	22	14	14	GTCGTCCTCCAGCACGTAGTCGCG	6	-	2311	2667
ENSDARG00000015911	ENSDART00000049626	22	14	14	AACTTCTGCGTGTCGATGAAGCT	5	-	2365	2667
ENSDARG00000015911	ENSDART00000049626	22	14	14	CTCATCACACTGAACTTCTGCGTGT	7	-	2375	2667
ENSDARG00000015911	ENSDART00000049626	22	16	16	GTAAAACGCAGACAGGCTGTGGAT	6	-	2584	2667
ENSDARG00000015911	ENSDART00000049626	22	16	16	AAACGCAGACAGGCTGTGGATGTT	6	-	2581	2667
ENSDARG00000015911	ENSDART00000049626	22	16	16	AAACGCAGACAGGCTGTGGATGT	5	-	2582	2667
ENSDARG00000016153	ENSDART00000004504	22	2	1	CCCTGCCCACCACCGCAGAGGAG	5	-	255	2598
ENSDARG00000016153	ENSDART00000004504	22	2	1	CACCACCGCAGAGGAGTCTGGGAA	6	-	247	2598
ENSDARG00000016153	ENSDART00000004504	22	2	1	TGCCCACCACCGCAGAGGAGTCT	5	-	252	2598
ENSDARG00000016153	ENSDART00000004504	22	2	1	ACCACCGCAGAGGAGTCTGGGAA	5	-	247	2598
ENSDARG00000016153	ENSDART00000004504	22	3	2	TTCTCCTCCTGAAGGATAAGGGGCA	7	-	2366	2598
ENSDARG00000016153	ENSDART00000004504	22	3	2	TGCTGCGCCTTGGTGGCTTGGTTG	6	-	1367	2598
ENSDARG00000016153	ENSDART00000004504	22	3	2	TGCTGCGCCTTGGTGGCTTGGTT	5	-	1368	2598
ENSDARG00000016153	ENSDART00000004504	22	3	2	TTCCCCTCCATAGGGGTGGAGAA	5	-	2527	2598
ENSDARG00000016153	ENSDART00000004504	22	3	2	TGCCACAGATGAAAGGCTGGGCA	5	-	567	2598
ENSDARG00000016153	ENSDART00000004504	22	3	2	TACTCCGGCGGAGGAAGCGGAGGCT	7	-	2390	2598
ENSDARG00000016153	ENSDART00000004504	22	3	2	GGCAAAATCTTCATGTGCTGGAGCC	7	-	701	2598
ENSDARG00000016153	ENSDART00000004504	22	3	2	CACATCATCAGTGCTCTGTCTTC	5	-	2147	2598
ENSDARG00000016153	ENSDART00000004504	22	3	2	ACAGGCAAAATCTTCATGTGCTGGA	7	-	704	2598
ENSDARG00000016188	ENSDART00000056032	22	1	1	AGCTTCACCTCTTGGACTGGTGC	5	-	187	1803
ENSDARG00000016188	ENSDART00000056032	22	3	3	TTCCTCTTCAGGCTGGGTTTGGG	5	-	287	1803
ENSDARG00000016188	ENSDART00000056032	22	3	3	TTCCTCTTCAGGCTGGGTTTGGGG	6	-	286	1803
ENSDARG00000016188	ENSDART00000056032	22	3	3	TTCCTCTTCAGGCTGGGTTTGGGGT	7	-	285	1803
ENSDARG00000016188	ENSDART00000056032	22	3	3	TTCCTCTTCCTCTTCAGGCTGGGTT	7	-	291	1803
ENSDARG00000016188	ENSDART00000056032	22	3	3	CTCTTCCTCTTCAGGCTGGGTTT	5	-	290	1803
ENSDARG00000016188	ENSDART00000056032	22	4	4	CTCCACCACGCGGTCTGGATGAGAT	7	-	396	1803
ENSDARG00000016188	ENSDART00000056032	22	5	5	ACCAGCGCCATCACCGATGAGGAA	6	-	583	1803
ENSDARG00000016188	ENSDART00000056032	22	5	5	GCCAGCCACTGTCCGGCCTTTGCC	6	-	610	1803
ENSDARG00000016188	ENSDART00000056032	22	7	7	CTCTCCCCAATCAGTGCTGAGTA	5	-	817	1803
ENSDARG00000016188	ENSDART00000056032	22	7	7	CTCTCCCCAATCAGTGCTGAGTAG	6	-	816	1803
ENSDARG00000016188	ENSDART00000056032	22	7	7	TCCCCAATCAGTGCTGAGTAGGTC	6	-	813	1803
ENSDARG00000016188	ENSDART00000056032	22	7	7	GACCCCTTCTGAGGTAGCTGTGTCT	7	-	780	1803
ENSDARG00000016188	ENSDART00000056032	22	9	9	AACCTCTTCTCAATGGTGTGGAGAA	7	-	1115	1803
ENSDARG00000016188	ENSDART00000056032	22	9	9	AACCTCTTCTCAATGGTGTGGAG	5	-	1117	1803
ENSDARG00000016188	ENSDART00000056032	22	11	11	GGCAGCGCACCTTGGCGGCGATGCA	7	-	1405	1803
ENSDARG00000016188	ENSDART00000056032	22	11	11	CCCTGCCTCCAACTCCTTTTTGGCC	7	-	1440	1803
ENSDARG00000016188	ENSDART00000056032	22	11	11	GACCCCACAGTGACTTTCTGGAGCT	7	-	1342	1803
ENSDARG00000016225	ENSDART00000031772	22	3	3	GACTTCGGCTGCGCTTTTGAAGTG	6	+	430	696
ENSDARG00000016225	ENSDART00000031772	22	3	3	TACAGCACCGAACACGAGGAAGAC	6	+	544	696
ENSDARG00000016225	ENSDART00000031772	22	4	4	TTAAAACACAAGTGGATGACGAG	5	+	655	696
ENSDARG00000016225	ENSDART00000031772	22	5	5	ATCGCCTACTTTAAAGGTGCAGTC	6	+	690	696
ENSDARG00000016281	ENSDART00000056478	22	1	1	CAAGTCCACTGTGACATTTGTGGGG	7	-	33	1230
ENSDARG00000016281	ENSDART00000056478	22	4	4	AAAATCAAACGGGAAGGTGTAGAT	6	-	340	1230
ENSDARG00000016281	ENSDART00000056478	22	4	4	AAATCAAACGGGAAGGTGTAGAT	5	-	340	1230
ENSDARG00000016281	ENSDART00000104655	22	2	2	CAAGTCCACTGTGACATTTGTGGGG	7	-	162	1083
ENSDARG00000016281	ENSDART00000104655	22	2	2	AGATGCTAATAAAAGAGCTGAAGGC	7	-	30	1083
ENSDARG00000016281	ENSDART00000104655	22	5	5	AAATCAAACGGGAAGGTGTAGAT	5	-	469	1083
ENSDARG00000016281	ENSDART00000104655	22	5	5	AAAATCAAACGGGAAGGTGTAGAT	6	-	469	1083
ENSDARG00000016281	ENSDART00000104655	22	7	7	AAAGACAAATGTAATGGGAGTGC	5	-	668	1083
ENSDARG00000016364	ENSDART00000046174	22	1	1	ACCCAATAAAAGCACTTTGATTTC	6	-	136	798
ENSDARG00000016364	ENSDART00000046174	22	1	1	AGCAACAGATGCACGTCGTGTAG	5	-	30	798
ENSDARG00000016364	ENSDART00000046174	22	2	2	ACCTCATTCTGTGGGTTTGCGTAG	6	-	324	798
ENSDARG00000016364	ENSDART00000046174	22	3	3	TCCAGCTGCGTCACCTGACGGATTT	7	-	374	798
ENSDARG00000016364	ENSDART00000046174	22	5	5	AGAGACAAACAGGCTGATGGAGCT	6	-	766	798
ENSDARG00000016730	ENSDART00000014057	22	1	1	TTCGTCAGAGTGGTCGAGTGGTTC	6	-	6	576
ENSDARG00000016730	ENSDART00000014057	22	3	3	AGCAGCCCACATCAGTGGTGTAA	5	-	179	576
ENSDARG00000016730	ENSDART00000014057	22	4	4	ATCTGCAAATCCTCCTGCGCTGGC	6	-	295	576
ENSDARG00000016730	ENSDART00000061411	22	1	1	TTCGTCAGAGTGGTCGAGTGGTTC	6	-	6	597
ENSDARG00000016730	ENSDART00000061411	22	4	4	AGCAGCCCACATCAGTGGTGTAA	5	-	209	597
ENSDARG00000016730	ENSDART00000061411	22	5	5	ATCTGCAAATCCTCCTGCGCTGGC	6	-	325	597
ENSDARG00000016744	ENSDART00000008681	22	2	2	TGCATCTGCAAGCCTGGGTTTGC	5	+	208	7011
ENSDARG00000016744	ENSDART00000008681	22	2	2	TGCATCTGCAAGCCTGGGTTTGCA	6	+	208	7011
ENSDARG00000016744	ENSDART00000008681	22	3	3	CACAAAGTCCGAATGCTGCTGCG	5	+	456	7011
ENSDARG00000016744	ENSDART00000008681	22	7	7	CTCCACAAACACCGTCTGCGTAGGC	7	+	939	7011
ENSDARG00000016744	ENSDART00000008681	22	7	7	CTCCACAAACACCGTCTGCGTAG	5	+	939	7011
ENSDARG00000016744	ENSDART00000008681	22	7	7	CCCTGCATCAATGGCATTTGCCGCA	7	+	865	7011
ENSDARG00000016744	ENSDART00000008681	22	7	7	GACTCCACAAACACCGTCTGCGTAG	7	+	937	7011
ENSDARG00000016744	ENSDART00000008681	22	7	7	CACAAACACCGTCTGCGTAGGCA	5	+	942	7011
ENSDARG00000016744	ENSDART00000008681	22	7	7	AACCCCTGCATCAATGGCATTTGCC	7	+	862	7011
ENSDARG00000016744	ENSDART00000008681	22	12	12	ATCGGCAGCTTCAAGTGTCGCTGTG	7	+	1561	7011
ENSDARG00000016744	ENSDART00000008681	22	14	14	ACCCACTGCTGTGCCGTGGAGGGA	6	+	1778	7011
ENSDARG00000016744	ENSDART00000008681	22	15	15	CCCGACAGACAGGGCTGTGTGGGT	6	+	1987	7011
ENSDARG00000016744	ENSDART00000008681	22	15	15	CCCGACAGACAGGGCTGTGTGGGTG	7	+	1987	7011
ENSDARG00000016744	ENSDART00000008681	22	16	16	TGCACCATCATGAACGGCGGCTGCG	7	+	2020	7011
ENSDARG00000016744	ENSDART00000008681	22	16	16	GAATGCAGCTGCAGCGAAGGATAC	6	+	2077	7011
ENSDARG00000016744	ENSDART00000008681	22	16	16	TGCACCATCATGAACGGCGGCTGC	6	+	2020	7011
ENSDARG00000016744	ENSDART00000008681	22	17	17	GCAGACATCGACGAGTGTGAAGAC	6	+	2128	7011
ENSDARG00000016744	ENSDART00000008681	22	17	17	AGACACACCAGATATCTGCGACGGC	7	+	2148	7011
ENSDARG00000016744	ENSDART00000008681	22	17	17	CACACCAGATATCTGCGACGGCGGC	7	+	2151	7011
ENSDARG00000016744	ENSDART00000008681	22	19	19	GGCAGCTTCAAGTGCCGATGCCGCG	7	+	2449	7011
ENSDARG00000016744	ENSDART00000008681	22	19	19	CCCGGCAGCTTCAAGTGCCGATGCC	7	+	2446	7011
ENSDARG00000016744	ENSDART00000008681	22	19	19	GGCTCATAACTGTGATCTGCATGC	6	+	2406	7011
ENSDARG00000016744	ENSDART00000008681	22	19	19	CGCGACGGCTGGGAGGGAGACGGC	6	+	2470	7011
ENSDARG00000016744	ENSDART00000008681	22	19	19	TGCCGCGACGGCTGGGAGGGAGAC	6	+	2467	7011
ENSDARG00000016744	ENSDART00000008681	22	20	20	CGCTGCTCCTGTAAAGAAGGATTC	6	+	2581	7011
ENSDARG00000016744	ENSDART00000008681	22	22	22	TGCAACTTCCAGAACATCTGTGTGT	7	+	2767	7011
ENSDARG00000016744	ENSDART00000008681	22	23	23	GAACCCGTCTGGTGTGGGCTGTG	5	+	2976	7011
ENSDARG00000016744	ENSDART00000008681	22	23	23	AACTGCATCAACGGTGTGTGTGT	5	+	2905	7011
ENSDARG00000016744	ENSDART00000008681	22	24	24	TCCTGCTGCTGCTCGCTGGGCGGAG	7	+	3097	7011
ENSDARG00000016744	ENSDART00000008681	22	25	25	CCCCTCAGCCGAGTATAAGACTCT	6	+	3156	7011
ENSDARG00000016744	ENSDART00000008681	22	25	25	CCCTCAGCCGAGTATAAGACTCT	5	+	3157	7011
ENSDARG00000016744	ENSDART00000008681	22	25	25	ATCACCGTCATCCTGGAGGGTAA	5	+	3214	7011
ENSDARG00000016744	ENSDART00000008681	22	26	26	AGACGCGCATCTGCGAAGGTGAA	5	+	3341	7011
ENSDARG00000016744	ENSDART00000008681	22	28	28	GACCAAAAAGATGTGCTGCTGCG	5	+	3552	7011
ENSDARG00000016744	ENSDART00000008681	22	28	28	GTCTTCAGACATGAGGAAGAGTGT	6	+	3477	7011
ENSDARG00000016744	ENSDART00000008681	22	28	28	AACTTCAACGACACCTGTGAAAAC	6	+	3511	7011
ENSDARG00000016744	ENSDART00000008681	22	30	30	ACATCCTGCTCATCTGCGAAGGT	5	+	3812	7011
ENSDARG00000016744	ENSDART00000008681	22	30	30	GGCATCTGCGCTAACGGCGTCTGC	6	+	3733	7011
ENSDARG00000016744	ENSDART00000008681	22	32	32	AACGTCTGCAGTCACGGCGAGTGC	6	+	3985	7011
ENSDARG00000016744	ENSDART00000008681	22	34	34	GGCTCCTTCAAGTGTTTGTGTCT	5	+	4267	7011
ENSDARG00000016744	ENSDART00000008681	22	34	34	GACGGCAAAAACTGCGTCGGTGAG	6	+	4312	7011
ENSDARG00000016744	ENSDART00000008681	22	36	36	CTATCAGACAATGGCCGACGCTGTT	7	+	4549	7011
ENSDARG00000016744	ENSDART00000008681	22	37	37	GTTTCACACGCTTTGAAGCGGGT	5	+	4595	7011
ENSDARG00000016744	ENSDART00000008681	22	37	37	GCAGTCTGCTGCCAGGTGAGGGA	5	+	4667	7011
ENSDARG00000016744	ENSDART00000008681	22	39	39	GGCGTCAACTGTGTGGGTGAGTTC	6	+	4903	7011
ENSDARG00000016744	ENSDART00000008681	22	39	39	GGCGTCAACTGTGTGGGTGAGTT	5	+	4903	7011
ENSDARG00000016744	ENSDART00000008681	22	39	39	ACAGGCGTCAACTGTGTGGGTGAG	6	+	4900	7011
ENSDARG00000016744	ENSDART00000008681	22	39	39	AGAAAACCCAGAAATCTGCGGGAAC	7	+	4809	7011
ENSDARG00000016744	ENSDART00000008681	22	39	39	AGAAAACCCAGAAATCTGCGGGA	5	+	4809	7011
ENSDARG00000016744	ENSDART00000008681	22	39	39	AACCTCGACTACACAGGCGTCAAC	6	+	4888	7011
ENSDARG00000016744	ENSDART00000008681	22	39	39	GAAAACCCAGAAATCTGCGGGAAC	6	+	4810	7011
ENSDARG00000016744	ENSDART00000008681	22	40	40	TGCTCAAACGTTCCTGGAGGTTTC	6	+	4963	7011
ENSDARG00000016744	ENSDART00000008681	22	41	41	GACGACAACCGCATGTGCAGAGGTG	7	+	5140	7011
ENSDARG00000016744	ENSDART00000008681	22	41	41	GCAGACATCAACGAGTGTGCGGTG	6	+	5035	7011
ENSDARG00000016744	ENSDART00000008681	22	41	41	GACATCAACGAGTGTGCGGTGAA	5	+	5038	7011
ENSDARG00000016744	ENSDART00000008681	22	42	42	CACGACGCCCTGATGGAGAGGGA	5	+	5264	7011
ENSDARG00000016744	ENSDART00000008681	22	44	44	AACACCGTCACCAAGTCTGAGTGC	6	+	5488	7011
ENSDARG00000016744	ENSDART00000008681	22	44	44	CACCAAGTCTGAGTGCTGCTGTA	5	+	5496	7011
ENSDARG00000016744	ENSDART00000008681	22	44	44	GAACCATCCAGTACAAGAAGATGTG	7	+	5567	7011
ENSDARG00000016744	ENSDART00000008681	22	44	44	AACACCGTCACCAAGTCTGAGTG	5	+	5488	7011
ENSDARG00000016744	ENSDART00000008681	22	45	45	TTCACCGGCACCTCCTGCATTGGTA	7	+	5731	7011
ENSDARG00000016744	ENSDART00000008681	22	45	45	CGCTGCCACTGCAATGTTGGGTAC	6	+	5698	7011
ENSDARG00000016744	ENSDART00000008681	22	45	45	CGCTGCCACTGCAATGTTGGGTA	5	+	5698	7011
ENSDARG00000016744	ENSDART00000008681	22	47	47	GCACCAGACGGCCTGCATAGGTG	5	+	5973	7011
ENSDARG00000016744	ENSDART00000008681	22	47	47	AGCACCAGACGGCCTGCATAGGTG	6	+	5972	7011
ENSDARG00000016744	ENSDART00000008681	22	47	47	TGCGTCAACACGATCGGTGGTTTC	6	+	5920	7011
ENSDARG00000016744	ENSDART00000008681	22	48	48	CCCGGCAGCTTCAACTGCGAGTGC	6	+	6055	7011
ENSDARG00000016744	ENSDART00000008681	22	49	49	ACAGACGTCGATGAATGCGGTGGAA	7	+	6118	7011
ENSDARG00000016744	ENSDART00000008681	22	49	49	ACAGACGTCGATGAATGCGGTGGA	6	+	6118	7011
ENSDARG00000016744	ENSDART00000008681	22	50	50	AACCAAGTCTGTGGGTCGGCGTC	5	+	6262	7011
ENSDARG00000016744	ENSDART00000008681	22	50	50	TGCTCCAACACAGATGGCGGATAC	6	+	6409	7011
ENSDARG00000016744	ENSDART00000008681	22	52	52	CACGACAGCGACTACTTGCTAGGGG	7	+	6952	7011
ENSDARG00000016744	ENSDART00000082109	22	1	1	CACAAAGTCCGAATGCTGCTGCG	5	+	111	5070
ENSDARG00000016744	ENSDART00000082109	22	5	5	GACTCCACAAACACCGTCTGCGTAG	7	+	592	5070
ENSDARG00000016744	ENSDART00000082109	22	5	5	CTCCACAAACACCGTCTGCGTAG	5	+	594	5070
ENSDARG00000016744	ENSDART00000082109	22	5	5	CACAAACACCGTCTGCGTAGGCA	5	+	597	5070
ENSDARG00000016744	ENSDART00000082109	22	5	5	CCCTGCATCAATGGCATTTGCCGCA	7	+	520	5070
ENSDARG00000016744	ENSDART00000082109	22	5	5	AACCCCTGCATCAATGGCATTTGCC	7	+	517	5070
ENSDARG00000016744	ENSDART00000082109	22	5	5	CTCCACAAACACCGTCTGCGTAGGC	7	+	594	5070
ENSDARG00000016744	ENSDART00000082109	22	10	10	ATCGGCAGCTTCAAGTGTCGCTGTG	7	+	1219	5070
ENSDARG00000016744	ENSDART00000082109	22	12	12	ACCCACTGCTGTGCCGTGGAGGGA	6	+	1436	5070
ENSDARG00000016744	ENSDART00000082109	22	13	13	CCCGACAGACAGGGCTGTGTGGGT	6	+	1645	5070
ENSDARG00000016744	ENSDART00000082109	22	13	13	CCCGACAGACAGGGCTGTGTGGGTG	7	+	1645	5070
ENSDARG00000016744	ENSDART00000082109	22	14	14	GAATGCAGCTGCAGCGAAGGATAC	6	+	1735	5070
ENSDARG00000016744	ENSDART00000082109	22	14	14	TGCACCATCATGAACGGCGGCTGCG	7	+	1678	5070
ENSDARG00000016744	ENSDART00000082109	22	14	14	TGCACCATCATGAACGGCGGCTGC	6	+	1678	5070
ENSDARG00000016744	ENSDART00000082109	22	15	15	AGACACACCAGATATCTGCGACGGC	7	+	1806	5070
ENSDARG00000016744	ENSDART00000082109	22	15	15	GCAGACATCGACGAGTGTGAAGAC	6	+	1786	5070
ENSDARG00000016744	ENSDART00000082109	22	15	15	CACACCAGATATCTGCGACGGCGGC	7	+	1809	5070
ENSDARG00000016744	ENSDART00000082109	22	17	17	TGCCGCGACGGCTGGGAGGGAGAC	6	+	2125	5070
ENSDARG00000016744	ENSDART00000082109	22	17	17	CGCGACGGCTGGGAGGGAGACGGC	6	+	2128	5070
ENSDARG00000016744	ENSDART00000082109	22	17	17	GGCTCATAACTGTGATCTGCATGC	6	+	2064	5070
ENSDARG00000016744	ENSDART00000082109	22	17	17	GGCAGCTTCAAGTGCCGATGCCGCG	7	+	2107	5070
ENSDARG00000016744	ENSDART00000082109	22	17	17	CCCGGCAGCTTCAAGTGCCGATGCC	7	+	2104	5070
ENSDARG00000016744	ENSDART00000082109	22	19	19	CGCTGCTCCTGTAAAGAAGGATTC	6	+	2224	5070
ENSDARG00000016744	ENSDART00000082109	22	21	21	TGCAACTTCCAGAACATCTGTGTGT	7	+	2410	5070
ENSDARG00000016744	ENSDART00000082109	22	23	23	AACTGCATCAACGGTGTGTGTGT	5	+	2551	5070
ENSDARG00000016744	ENSDART00000082109	22	23	23	GAACCCGTCTGGTGTGGGCTGTG	5	+	2622	5070
ENSDARG00000016744	ENSDART00000082109	22	24	24	TCCTGCTGCTGCTCGCTGGGCGGAG	7	+	2743	5070
ENSDARG00000016744	ENSDART00000082109	22	25	25	ATCACCGTCATCCTGGAGGGTAA	5	+	2860	5070
ENSDARG00000016744	ENSDART00000082109	22	25	25	CCCCTCAGCCGAGTATAAGACTCT	6	+	2802	5070
ENSDARG00000016744	ENSDART00000082109	22	25	25	CCCTCAGCCGAGTATAAGACTCT	5	+	2803	5070
ENSDARG00000016744	ENSDART00000082109	22	26	26	AGACGCGCATCTGCGAAGGTGAA	5	+	2987	5070
ENSDARG00000016744	ENSDART00000082109	22	28	28	GACCAAAAAGATGTGCTGCTGCG	5	+	3198	5070
ENSDARG00000016744	ENSDART00000082109	22	28	28	AACTTCAACGACACCTGTGAAAAC	6	+	3157	5070
ENSDARG00000016744	ENSDART00000082109	22	28	28	GTCTTCAGACATGAGGAAGAGTGT	6	+	3123	5070
ENSDARG00000016744	ENSDART00000082109	22	30	30	GGCATCTGCGCTAACGGCGTCTGC	6	+	3379	5070
ENSDARG00000016744	ENSDART00000082109	22	30	30	ACATCCTGCTCATCTGCGAAGGT	5	+	3458	5070
ENSDARG00000016744	ENSDART00000082109	22	32	32	AACGTCTGCAGTCACGGCGAGTGC	6	+	3631	5070
ENSDARG00000016744	ENSDART00000082109	22	34	34	GGCTCCTTCAAGTGTTTGTGTCT	5	+	3913	5070
ENSDARG00000016744	ENSDART00000082109	22	34	34	GACGGCAAAAACTGCGTCGGTGAG	6	+	3958	5070
ENSDARG00000016744	ENSDART00000082109	22	36	36	CTATCAGACAATGGCCGACGCTGTT	7	+	4195	5070
ENSDARG00000016744	ENSDART00000082109	22	37	37	GCAGTCTGCTGCCAGGTGAGGGA	5	+	4313	5070
ENSDARG00000016744	ENSDART00000082109	22	37	37	GTTTCACACGCTTTGAAGCGGGT	5	+	4241	5070
ENSDARG00000016744	ENSDART00000082109	22	39	39	GGCGTCAACTGTGTGGGTGAGTTC	6	+	4552	5070
ENSDARG00000016744	ENSDART00000082109	22	39	39	AACCTCGACTACACAGGCGTCAAC	6	+	4537	5070
ENSDARG00000016744	ENSDART00000082109	22	39	39	AGAAAACCCAGAAATCTGCGGGA	5	+	4458	5070
ENSDARG00000016744	ENSDART00000082109	22	39	39	GAAAACCCAGAAATCTGCGGGAAC	6	+	4459	5070
ENSDARG00000016744	ENSDART00000082109	22	39	39	AGAAAACCCAGAAATCTGCGGGAAC	7	+	4458	5070
ENSDARG00000016744	ENSDART00000082109	22	39	39	GGCGTCAACTGTGTGGGTGAGTT	5	+	4552	5070
ENSDARG00000016744	ENSDART00000082109	22	39	39	ACAGGCGTCAACTGTGTGGGTGAG	6	+	4549	5070
ENSDARG00000016744	ENSDART00000082109	22	40	40	TGCTCAAACGTTCCTGGAGGTTTC	6	+	4612	5070
ENSDARG00000016744	ENSDART00000082109	22	41	41	GACGACAACCGCATGTGCAGAGGTG	7	+	4789	5070
ENSDARG00000016744	ENSDART00000082109	22	41	41	GCAGACATCAACGAGTGTGCGGTG	6	+	4684	5070
ENSDARG00000016744	ENSDART00000082109	22	41	41	GACATCAACGAGTGTGCGGTGAA	5	+	4687	5070
ENSDARG00000016744	ENSDART00000082109	22	42	42	CACGACGCCCTGATGGAGAGGGA	5	+	4913	5070
ENSDARG00000016825	ENSDART00000011961	22	3	3	CACTCAGACGAACCTTGCTGCTGAC	7	-	163	3756
ENSDARG00000016825	ENSDART00000011961	22	4	4	TTCTGCGTCTTCTTGAGGTTGAGCT	7	-	425	3756
ENSDARG00000016825	ENSDART00000011961	22	4	4	TTCTGCGTCTTCTTGAGGTTGAG	5	-	427	3756
ENSDARG00000016825	ENSDART00000011961	22	4	4	TGCCAACCACACCATTAGCATAC	5	-	333	3756
ENSDARG00000016825	ENSDART00000011961	22	4	4	AGAGACTCCTGCTGGGGCGAAAAC	6	-	358	3756
ENSDARG00000016825	ENSDART00000011961	22	7	7	CTCCACAAAAGCCAAGGTTTGTCT	6	-	781	3756
ENSDARG00000016825	ENSDART00000011961	22	9	9	GCATCCAGAAGCCAGCGCCTAGTAA	7	-	1085	3756
ENSDARG00000016825	ENSDART00000011961	22	12	12	AGCTCCAGCAAGACTGGAGATGAG	6	-	1705	3756
ENSDARG00000016825	ENSDART00000011961	22	12	12	CAACCATGCGCACCTCTGGGTGGAG	7	-	1642	3756
ENSDARG00000016825	ENSDART00000011961	22	14	14	AGCTACAACAGCTCTGGGCAGGA	5	-	1976	3756
ENSDARG00000016825	ENSDART00000011961	22	14	14	ACCTCAACAACATCAGCAGCGGCT	6	-	2022	3756
ENSDARG00000016825	ENSDART00000011961	22	14	14	AGCAGCTCCAATCATAAGAGGAG	5	-	1919	3756
ENSDARG00000016825	ENSDART00000011961	22	14	14	TACCTCAACAACATCAGCAGCGGCT	7	-	2022	3756
ENSDARG00000016825	ENSDART00000011961	22	17	17	AGATGCAGCAGCAACAGCAGCAGTG	7	-	2421	3756
ENSDARG00000016825	ENSDART00000011961	22	17	17	TGCAGCAGCAACAGCAGCAGTGTAC	7	-	2418	3756
ENSDARG00000016825	ENSDART00000011961	22	17	17	TTCAGCTGCGAGCAAAGGTTTGGCA	7	-	2343	3756
ENSDARG00000016825	ENSDART00000011961	22	19	19	CCCATCACAGCAAATGTCTGGAGAG	7	-	2561	3756
ENSDARG00000016825	ENSDART00000011961	22	19	19	AGAGCCTCCACCTTGTAGTTGCC	5	-	2683	3756
ENSDARG00000016825	ENSDART00000011961	22	20	20	TACCCAATCATTAGCATTTGATGTT	7	-	2835	3756
ENSDARG00000016825	ENSDART00000011961	22	21	21	TGCCACTGCAACATGGGCTGAGTGC	7	-	3018	3756
ENSDARG00000016825	ENSDART00000011961	22	21	21	TGCCACTGCAACATGGGCTGAGTG	6	-	3019	3756
[truncated: 10,793 more rows]
