# Supplementary material for: Rapid Mutation of Endogenous Zebrafish Genes Using Zinc Finger Nucleases Made by Oligomerized Pool ENgineering (OPEN)
Source: PLoS One. 2009 Feb 9;4(2):e4348. doi: 10.1371/journal.pone.0004348 (PMC2634973; doi:10.1371/journal.pone.0004348)
Supplement: Table S23 — Potential OPEN ZFN target sites in gene transcripts encoded on zebrafish chromosome 23. Data presented as described in the legend to Table S1. (1.98 MB XLS) [file pone.0004348.s023.xls]

## Sheet: Chromosome23
Gene ID	Transcript ID	Chromosome Number	Exon Number	Coding Exon Number	TargetSite	ZFN Spacer Length	Strand	ZFN Cleavage Site	Coding Sequence Length
ENSDARG00000000474	ENSDART00000000488	23	6	6	AGCGGCCCCCACTGAGGAGGGTAA	6	+	341	552
ENSDARG00000000474	ENSDART00000000488	23	6	6	GCCATCCTCCGGTCACTGCTAGGCT	7	+	379	552
ENSDARG00000000474	ENSDART00000000488	23	7	7	TTCTACAGAAGAGGCCGGTTGAGGA	7	+	464	552
ENSDARG00000000588	ENSDART00000000620	23	1	1	GTAAACCTCGGTGGAGTTTGAGGGT	7	-	144	1089
ENSDARG00000000588	ENSDART00000000620	23	1	1	GTAAACCTCGGTGGAGTTTGAGGG	6	-	145	1089
ENSDARG00000000588	ENSDART00000000620	23	7	7	TTCTCATGCAGGGTTTGCTGGAGAG	7	-	587	1089
ENSDARG00000000588	ENSDART00000000620	23	7	7	AACTCACCATGCACGAGCCGCTGCT	7	-	644	1089
ENSDARG00000000588	ENSDART00000000620	23	8	8	CGCTGCTGCTGGTGCTGTCGGTGCC	7	-	763	1089
ENSDARG00000000588	ENSDART00000000620	23	8	8	GTCGTCTTCAGCCGTGGCGGCGCT	6	-	799	1089
ENSDARG00000000588	ENSDART00000000620	23	9	9	TTCCTCCTCCTCCAGAGGTCTGT	5	-	1067	1089
ENSDARG00000000588	ENSDART00000000620	23	9	9	TCCTCCTCCAGAGGTCTGTTGAGTC	7	-	1061	1089
ENSDARG00000000588	ENSDART00000000620	23	9	9	TCCTCCTCCAGAGGTCTGTTGAG	5	-	1063	1089
ENSDARG00000000588	ENSDART00000000620	23	9	9	CTCCTCCTCCAGAGGTCTGTTGAG	6	-	1063	1089
ENSDARG00000000588	ENSDART00000103343	23	1	1	GTAAACCTCGGTGGAGTTTGAGGG	6	-	145	1146
ENSDARG00000000588	ENSDART00000103343	23	1	1	GTAAACCTCGGTGGAGTTTGAGGGT	7	-	144	1146
ENSDARG00000000588	ENSDART00000103343	23	7	7	AACTCACCATGCACGAGCCGCTGCT	7	-	644	1146
ENSDARG00000000588	ENSDART00000103343	23	7	7	TTCTCATGCAGGGTTTGCTGGAGAG	7	-	587	1146
ENSDARG00000000588	ENSDART00000103343	23	8	8	TTCCTCCTCCTCCAGAGGTCTGT	5	-	1124	1146
ENSDARG00000000588	ENSDART00000103343	23	8	8	TCCTCCTCCAGAGGTCTGTTGAGTC	7	-	1118	1146
ENSDARG00000000588	ENSDART00000103343	23	8	8	TCCTCCTCCAGAGGTCTGTTGAG	5	-	1120	1146
ENSDARG00000000588	ENSDART00000103343	23	8	8	GTCGTCTTCAGCCGTGGCGGCGCT	6	-	799	1146
ENSDARG00000000588	ENSDART00000103343	23	8	8	GAAGCCTCCGCACTGCTGTTTTT	5	-	1031	1146
ENSDARG00000000588	ENSDART00000103343	23	8	8	CTCCTCCTCCAGAGGTCTGTTGAG	6	-	1120	1146
ENSDARG00000000588	ENSDART00000103343	23	8	8	CGCTGCTGCTGGTGCTGTCGGTGCC	7	-	763	1146
ENSDARG00000000796	ENSDART00000000876	23	2	1	TGCTGCCCACACAGGTAGAAGCA	5	-	225	1722
ENSDARG00000000796	ENSDART00000000876	23	2	1	TGCCCACACAGGTAGAAGCAGCT	5	-	222	1722
ENSDARG00000000796	ENSDART00000000876	23	2	1	TCCAGCTGCCCGGAGGTGCTGCC	5	-	241	1722
ENSDARG00000000796	ENSDART00000000876	23	2	1	GTCCCATGCAGACATGTGCTGGT	5	-	410	1722
ENSDARG00000000796	ENSDART00000000876	23	2	1	CCCGGCTGCCCTGCTCTAAGCTGAG	7	-	631	1722
ENSDARG00000000796	ENSDART00000000876	23	2	1	CCCCAACCAGAGAAGTGATGCTGGG	7	-	151	1722
ENSDARG00000000796	ENSDART00000000876	23	3	2	AGCGGCAGAACTGGCATCTGTTTCT	7	-	871	1722
ENSDARG00000000796	ENSDART00000000876	23	4	3	CCCTTCTTCCTTTCAGGCTGTCTGT	7	-	940	1722
ENSDARG00000000796	ENSDART00000000876	23	5	4	TTCTCAGGCAATCCAGATGTTGAT	6	-	1104	1722
ENSDARG00000000796	ENSDART00000000876	23	7	6	GAAGTCTTCGATCCGTTTGGGCT	5	-	1496	1722
ENSDARG00000000796	ENSDART00000000876	23	7	6	TTATCCACAATGGGTGGAGGTGGGA	7	-	1682	1722
ENSDARG00000000796	ENSDART00000000876	23	7	6	TTATCCACAATGGGTGGAGGTGGG	6	-	1683	1722
ENSDARG00000000796	ENSDART00000000876	23	7	6	GACCAAGTCTTCCAGTTTGAGAT	5	-	1661	1722
ENSDARG00000000887	ENSDART00000000992	23	3	2	GCCAGCGACCCTAATAGGATTGTGC	7	+	118	546
ENSDARG00000000887	ENSDART00000000992	23	5	4	CCCTGCACCCAATGAGGACTGGGAA	7	+	393	546
ENSDARG00000000887	ENSDART00000044523	23	2	2	GCCAGCGACCCTAATAGGATTGTGC	7	+	118	546
ENSDARG00000000887	ENSDART00000044523	23	4	4	CCCTGCACCCAATGAGGACTGGGAA	7	+	393	546
ENSDARG00000001274	ENSDART00000001451	23	3	3	CTATCCAACTTTGTGGTGAGTAC	5	+	201	1596
ENSDARG00000001274	ENSDART00000001451	23	5	5	AAACTCTTACATCAGTGGGAAGTA	6	+	372	1596
ENSDARG00000001274	ENSDART00000001451	23	8	8	GCCTGCTTCCACCAGCTCTGATGAT	7	+	885	1596
ENSDARG00000001274	ENSDART00000001451	23	8	8	TGCTTCCACCAGCTCTGATGATGTG	7	+	888	1596
ENSDARG00000001274	ENSDART00000001451	23	8	8	TGCTTCAGATGCTGAGTCTGGTGGC	7	+	851	1596
ENSDARG00000001274	ENSDART00000001451	23	8	8	AGAACCACCTGCTTCAGATGCTGAG	7	+	842	1596
ENSDARG00000001274	ENSDART00000001451	23	8	8	ACCACCTGCTTCAGATGCTGAGTCT	7	+	845	1596
ENSDARG00000001274	ENSDART00000001451	23	8	8	ACCACCTGCTTCAGATGCTGAGTC	6	+	845	1596
ENSDARG00000001274	ENSDART00000001451	23	9	9	AGACCCAGAGGGAGAAGGGGAGGCA	7	+	990	1596
ENSDARG00000001274	ENSDART00000001451	23	10	10	GCCATCTACGCCAAGATGATGAG	5	+	1255	1596
ENSDARG00000001274	ENSDART00000001451	23	12	12	TCCTTCATCAGATAGAGTCTGAGAA	7	+	1463	1596
ENSDARG00000001437	ENSDART00000025414	23	3	3	CTCGGCTCCTTCTCAGTGGGACTCT	7	+	241	1464
ENSDARG00000001437	ENSDART00000025414	23	3	3	GGCTTCTACAATGAGACGTGGCA	5	+	133	1464
ENSDARG00000001437	ENSDART00000025414	23	4	4	CCCGACTTCATTACGTGGGGCGCT	6	+	453	1464
ENSDARG00000001437	ENSDART00000025414	23	4	4	AGCTGCTGCTTTTATGGGCTTTT	5	+	324	1464
ENSDARG00000001437	ENSDART00000025414	23	5	5	CTCATCAACCAGAACGAAGAGGCC	6	+	652	1464
ENSDARG00000001437	ENSDART00000025414	23	6	6	TTCATCGCCATCATGCTGCAGCT	5	+	826	1464
ENSDARG00000001437	ENSDART00000025414	23	6	6	GCAGACAGATGATGAGGGAGAAGAC	7	+	752	1464
ENSDARG00000001437	ENSDART00000025414	23	7	7	GAACACAGCATTCACAGTGGTTTCT	7	+	957	1464
ENSDARG00000001437	ENSDART00000025414	23	7	7	TTATGCCACCATTGGTGCTGGAGCT	7	+	930	1464
ENSDARG00000001437	ENSDART00000025414	23	8	8	CACTGCATCTTGTTGGTTTGATGGG	7	+	1013	1464
ENSDARG00000001437	ENSDART00000025414	23	9	9	TCCTTCTGCCTTCGCTGTCGCTGGT	7	+	1209	1464
ENSDARG00000001437	ENSDART00000025414	23	9	9	GTAGCCATCTTCAGTTTTGTGGCA	6	+	1117	1464
ENSDARG00000001437	ENSDART00000025414	23	9	9	GCCATCTTCAGTTTTGTGGCATTT	6	+	1120	1464
ENSDARG00000001437	ENSDART00000025414	23	10	10	GCCAGCTTCCGCACCGGGGCAGAT	6	+	1402	1464
ENSDARG00000001437	ENSDART00000025414	23	10	10	ACCAAAGGCCGGTCGTTTGAAGAG	6	+	1372	1464
ENSDARG00000001437	ENSDART00000104125	23	3	3	CTCGGCTCCTTCTCAGTGGGACTCT	7	+	241	1401
ENSDARG00000001437	ENSDART00000104125	23	3	3	GGCTTCTACAATGAGACGTGGCA	5	+	133	1401
ENSDARG00000001437	ENSDART00000104125	23	4	4	AGCTGCTGCTTTTATGGGCTTTT	5	+	324	1401
ENSDARG00000001437	ENSDART00000104125	23	4	4	CCCGACTTCATTACGTGGGGCGCT	6	+	453	1401
ENSDARG00000001437	ENSDART00000104125	23	5	5	CTCATCAACCAGAACGAAGAGGCC	6	+	652	1401
ENSDARG00000001437	ENSDART00000104125	23	6	6	TTCATCGCCATCATGCTGCAGCT	5	+	826	1401
ENSDARG00000001437	ENSDART00000104125	23	6	6	GCAGACAGATGATGAGGGAGAAGAC	7	+	752	1401
ENSDARG00000001437	ENSDART00000104125	23	7	7	GAACACAGCATTCACAGTGGTTTCT	7	+	957	1401
ENSDARG00000001437	ENSDART00000104125	23	7	7	TTATGCCACCATTGGTGCTGGAGCT	7	+	930	1401
ENSDARG00000001437	ENSDART00000104125	23	8	8	CACTGCATCTTGTTGGTTTGATGGG	7	+	1013	1401
ENSDARG00000001437	ENSDART00000104125	23	9	9	TCCTTCTGCCTTCGCTGTCGCTGGT	7	+	1209	1401
ENSDARG00000001437	ENSDART00000104125	23	9	9	GCCATCTTCAGTTTTGTGGCATTT	6	+	1120	1401
ENSDARG00000001437	ENSDART00000104125	23	9	9	GTAGCCATCTTCAGTTTTGTGGCA	6	+	1117	1401
ENSDARG00000001437	ENSDART00000104125	23	10	10	ACCAAAGGCCGGTCGTTTGAAGAG	6	+	1372	1401
ENSDARG00000001754	ENSDART00000054299	23	5	5	CTAATCAAAGTTGGTGTGGGTTCT	6	-	480	2241
ENSDARG00000001754	ENSDART00000054299	23	5	5	CTAATCAAAGTTGGTGTGGGTTC	5	-	481	2241
ENSDARG00000001754	ENSDART00000054299	23	5	5	CTCATCAGAATCACCCTTTGTTGTA	7	-	537	2241
ENSDARG00000001754	ENSDART00000054299	23	6	6	GTTTTCAGCTTCAGCATTTTTTGCA	7	-	641	2241
ENSDARG00000001754	ENSDART00000054299	23	6	6	TTCAGCTTCAGCATTTTTTGCAGAG	7	-	638	2241
ENSDARG00000001754	ENSDART00000054299	23	7	7	TACATCTTAATATCAATCTGATTTT	7	-	722	2241
ENSDARG00000001754	ENSDART00000054299	23	8	8	TACGGCACCATCTGGTTGGCGTG	5	-	814	2241
ENSDARG00000001754	ENSDART00000054299	23	8	8	AGAAACTGCCTGCACTGTTTTGGC	6	-	849	2241
ENSDARG00000001754	ENSDART00000054299	23	8	8	AACTGCAGCTATAACTGTGGCTTG	6	-	784	2241
ENSDARG00000001754	ENSDART00000054299	23	8	8	AGAAACTGCCTGCACTGTTTTGGCA	7	-	848	2241
ENSDARG00000001754	ENSDART00000054299	23	11	11	AAATCCTACTTGATGCAGCCGAT	5	-	1306	2241
ENSDARG00000001754	ENSDART00000054299	23	14	14	CAATGCTGCAGGCCTGTGTGTGGAA	7	-	1588	2241
ENSDARG00000001754	ENSDART00000054299	23	15	15	TCCAGCAGCTGCCGCATCTGCTTGC	7	-	1688	2241
ENSDARG00000001754	ENSDART00000054299	23	15	15	GCCTTCGTCCTGTGATGTGGCTGCA	7	-	1729	2241
ENSDARG00000001754	ENSDART00000054299	23	15	15	GCCTTCGTCCTGTGATGTGGCTGC	6	-	1730	2241
ENSDARG00000001754	ENSDART00000054299	23	15	15	GCCAAAAGCAGCTTTCTGCCTTC	5	-	1748	2241
ENSDARG00000001754	ENSDART00000054299	23	15	15	ATCAGCCACGCCAAAAGCAGCTTTC	7	-	1755	2241
ENSDARG00000001754	ENSDART00000054299	23	15	15	CGCATCTGCTTGCAATAATTGGCC	6	-	1677	2241
ENSDARG00000001754	ENSDART00000054299	23	15	15	ATCTTCTCCAGCAGCTGCCGCATCT	7	-	1694	2241
ENSDARG00000001754	ENSDART00000054299	23	16	16	ACCAGCTTCTCCCAGGCTGCCTGT	6	-	1788	2241
ENSDARG00000001754	ENSDART00000054299	23	19	19	TACTCAACATCTTCTTTGGAGCT	5	-	2160	2241
ENSDARG00000001754	ENSDART00000054299	23	19	19	CTCAACATCTTCTTTGGAGCTTTG	6	-	2157	2241
ENSDARG00000001754	ENSDART00000054299	23	19	19	GTACTCAACATCTTCTTTGGAGCT	6	-	2160	2241
ENSDARG00000001754	ENSDART00000091662	23	5	5	CTAATCAAAGTTGGTGTGGGTTC	5	-	496	2256
ENSDARG00000001754	ENSDART00000091662	23	5	5	CTAATCAAAGTTGGTGTGGGTTCT	6	-	495	2256
ENSDARG00000001754	ENSDART00000091662	23	5	5	CTCATCAGAATCACCCTTTGTTGTA	7	-	552	2256
ENSDARG00000001754	ENSDART00000091662	23	6	6	GTTTTCAGCTTCAGCATTTTTTGCA	7	-	656	2256
ENSDARG00000001754	ENSDART00000091662	23	6	6	TTCAGCTTCAGCATTTTTTGCAGAG	7	-	653	2256
ENSDARG00000001754	ENSDART00000091662	23	7	7	TACATCTTAATATCAATCTGATTTT	7	-	737	2256
ENSDARG00000001754	ENSDART00000091662	23	8	8	TACGGCACCATCTGGTTGGCGTG	5	-	829	2256
ENSDARG00000001754	ENSDART00000091662	23	8	8	AGAAACTGCCTGCACTGTTTTGGCA	7	-	863	2256
ENSDARG00000001754	ENSDART00000091662	23	8	8	AGAAACTGCCTGCACTGTTTTGGC	6	-	864	2256
ENSDARG00000001754	ENSDART00000091662	23	8	8	AACTGCAGCTATAACTGTGGCTTG	6	-	799	2256
ENSDARG00000001754	ENSDART00000091662	23	11	11	AAATCCTACTTGATGCAGCCGAT	5	-	1321	2256
ENSDARG00000001754	ENSDART00000091662	23	14	14	CAATGCTGCAGGCCTGTGTGTGGAA	7	-	1603	2256
ENSDARG00000001754	ENSDART00000091662	23	15	15	TCCAGCAGCTGCCGCATCTGCTTGC	7	-	1703	2256
ENSDARG00000001754	ENSDART00000091662	23	15	15	CGCATCTGCTTGCAATAATTGGCC	6	-	1692	2256
ENSDARG00000001754	ENSDART00000091662	23	15	15	GCCTTCGTCCTGTGATGTGGCTGCA	7	-	1744	2256
ENSDARG00000001754	ENSDART00000091662	23	15	15	GCCTTCGTCCTGTGATGTGGCTGC	6	-	1745	2256
ENSDARG00000001754	ENSDART00000091662	23	15	15	ATCAGCCACGCCAAAAGCAGCTTTC	7	-	1770	2256
ENSDARG00000001754	ENSDART00000091662	23	15	15	ATCTTCTCCAGCAGCTGCCGCATCT	7	-	1709	2256
ENSDARG00000001754	ENSDART00000091662	23	15	15	GCCAAAAGCAGCTTTCTGCCTTC	5	-	1763	2256
ENSDARG00000001754	ENSDART00000091662	23	16	16	ACCAGCTTCTCCCAGGCTGCCTGT	6	-	1803	2256
ENSDARG00000001754	ENSDART00000091662	23	19	19	CTCAACATCTTCTTTGGAGCTTTG	6	-	2172	2256
ENSDARG00000001754	ENSDART00000091662	23	19	19	TACTCAACATCTTCTTTGGAGCT	5	-	2175	2256
ENSDARG00000001754	ENSDART00000091662	23	19	19	GTACTCAACATCTTCTTTGGAGCT	6	-	2175	2256
ENSDARG00000001881	ENSDART00000014825	23	2	2	ACATTCGTCTTCACTGCGAATGC	5	-	145	1503
ENSDARG00000001881	ENSDART00000014825	23	6	6	TACTCACTCTCACCTGCAGATGGC	6	-	435	1503
ENSDARG00000001881	ENSDART00000014825	23	7	7	CACACCTACCTGCTTTAGCTTCT	5	-	458	1503
ENSDARG00000001881	ENSDART00000014825	23	8	8	GGCACCACATCATATGGAGGAATGT	7	-	479	1503
ENSDARG00000001881	ENSDART00000014825	23	8	8	CACCACATCATATGGAGGAATGT	5	-	479	1503
ENSDARG00000001881	ENSDART00000014825	23	9	9	TCCATCAAAGCGATGTTTGAGAA	5	-	587	1503
ENSDARG00000001881	ENSDART00000014825	23	11	11	GCATCCAGAATCACCAGCTGAAGGG	7	-	758	1503
ENSDARG00000001881	ENSDART00000014825	23	11	11	ATCACCAGCTGAAGGGTTTTGGCC	6	-	750	1503
ENSDARG00000001881	ENSDART00000014825	23	11	11	ATCACCAGCTGAAGGGTTTTGGC	5	-	751	1503
ENSDARG00000001881	ENSDART00000014825	23	15	15	TCCCACTCCACCCCCGGCAGGCGAC	7	-	1155	1503
ENSDARG00000001881	ENSDART00000014825	23	15	15	TTCCTCGTCCTCTGGGGGATGCA	5	-	1274	1503
ENSDARG00000001881	ENSDART00000014825	23	15	15	TTCTTCCTCGTCCTCTGGGGGATGC	7	-	1275	1503
ENSDARG00000001881	ENSDART00000014825	23	15	15	GGCCTCGTCGGAGGGCATGAGGC	5	-	1211	1503
ENSDARG00000001881	ENSDART00000014825	23	15	15	CTCTTCTTCCTCGTCCTCTGGGGGA	7	-	1278	1503
ENSDARG00000001881	ENSDART00000014825	23	15	15	CTCGTCCTCTGGGGGATGCAGGG	5	-	1271	1503
ENSDARG00000001881	ENSDART00000014825	23	15	15	AGAGCCTCCTCGGTGGAGGGAGCG	6	-	1243	1503
ENSDARG00000001881	ENSDART00000087280	23	1	1	ACCCCAGACAGAGGGTCTGCGGAA	6	-	36	1317
ENSDARG00000001881	ENSDART00000087280	23	1	1	TACCCCAGACAGAGGGTCTGCGGAA	7	-	36	1317
ENSDARG00000001881	ENSDART00000087280	23	2	2	TTCGGCAACTTTCGTGGAAGCTGTA	7	-	86	1317
ENSDARG00000001881	ENSDART00000087280	23	4	4	ACATTCGTCTTCACTGCGAATGC	5	-	316	1317
ENSDARG00000001881	ENSDART00000087280	23	6	6	TACTCACTCTCACCTGCAGATGGC	6	-	609	1317
ENSDARG00000001881	ENSDART00000087280	23	8	8	CACCACATCATATGGAGGAATGT	5	-	647	1317
ENSDARG00000001881	ENSDART00000087280	23	8	8	GGCACCACATCATATGGAGGAATGT	7	-	647	1317
ENSDARG00000001881	ENSDART00000087280	23	9	9	TCCATCAAAGCGATGTTTGAGAA	5	-	755	1317
ENSDARG00000001881	ENSDART00000087280	23	11	11	ATCACCAGCTGAAGGGTTTTGGCC	6	-	918	1317
ENSDARG00000001881	ENSDART00000087280	23	11	11	ATCACCAGCTGAAGGGTTTTGGC	5	-	919	1317
ENSDARG00000001881	ENSDART00000087280	23	11	11	GCATCCAGAATCACCAGCTGAAGGG	7	-	926	1317
ENSDARG00000001889	ENSDART00000009277	23	2	2	GACAAAACCATCGGAGGAGGTGAT	6	+	124	1353
ENSDARG00000001889	ENSDART00000009277	23	2	2	AGCGACAAAACCATCGGAGGAGGTG	7	+	121	1353
ENSDARG00000001889	ENSDART00000009277	23	2	2	AGCGACAAAACCATCGGAGGAGGT	6	+	121	1353
ENSDARG00000001889	ENSDART00000009277	23	2	2	GCATCCAGCCGGATGGGCAGATGCC	7	+	95	1353
ENSDARG00000001889	ENSDART00000009277	23	2	2	AAACACGTCCCTAGGGCTGTCTTT	6	+	187	1353
ENSDARG00000001889	ENSDART00000009277	23	2	2	AAAACCATCGGAGGAGGTGATGAC	6	+	127	1353
ENSDARG00000001889	ENSDART00000009277	23	3	3	CTCATCACAGGAAAGGAAGATGCT	6	+	283	1353
ENSDARG00000001889	ENSDART00000009277	23	4	4	GTCTTCCACAGCTTTGGTGGTGGCA	7	+	418	1353
ENSDARG00000001889	ENSDART00000009277	23	4	4	GGCTTCACCTCTCTGCTGATGGA	5	+	451	1353
ENSDARG00000001889	ENSDART00000009277	23	4	4	GTCGACTCCATCGAGGGTGAGGG	5	+	1318	1353
ENSDARG00000001889	ENSDART00000009277	23	4	4	GTCGACTCCATCGAGGGTGAGGGA	6	+	1318	1353
ENSDARG00000001889	ENSDART00000009277	23	4	4	GTCTTCCACAGCTTTGGTGGTGGC	6	+	418	1353
ENSDARG00000001889	ENSDART00000009277	23	4	4	TCCATCACAGCCTCCCTTAGGTTTG	7	+	718	1353
ENSDARG00000001889	ENSDART00000009277	23	4	4	GACTCCATCGAGGGTGAGGGAGAG	6	+	1321	1353
ENSDARG00000001889	ENSDART00000009277	23	4	4	AACACCACAGCTATTGCTGAGGC	5	+	1147	1353
ENSDARG00000001889	ENSDART00000009277	23	4	4	ACAGCCTCCCTTAGGTTTGATGGT	6	+	724	1353
ENSDARG00000001889	ENSDART00000009277	23	4	4	ACCAACCTCAACAGGCTAATTGGCC	7	+	682	1353
ENSDARG00000001889	ENSDART00000009277	23	4	4	CAACACCACAGCTATTGCTGAGGC	6	+	1146	1353
ENSDARG00000001889	ENSDART00000009277	23	4	4	CACAGCCTCCCTTAGGTTTGATGGT	7	+	723	1353
ENSDARG00000001996	ENSDART00000003412	23	1	1	TCCCGCCACGCCTTTTTTAGGGA	5	-	557	1092
ENSDARG00000001996	ENSDART00000003412	23	1	1	TCCCGCATCCACCGGTCGCAGAG	5	-	312	1092
ENSDARG00000001996	ENSDART00000003412	23	1	1	GTTGGCGGCCTTATTGGAGCGGGA	6	-	735	1092
ENSDARG00000001996	ENSDART00000003412	23	1	1	GTCGTCTTCGTCCTCTGCGTCTTC	6	-	865	1092
ENSDARG00000001996	ENSDART00000003412	23	1	1	GGCCGCCCAAAATAGTTGGCGGC	5	-	750	1092
ENSDARG00000001996	ENSDART00000003412	23	1	1	GCCCTCCACCAGGGGGCGGTCTGT	6	-	1019	1092
ENSDARG00000001996	ENSDART00000003412	23	1	1	GCATCCACCGGTCGCAGAGGCTTTC	7	-	306	1092
ENSDARG00000001996	ENSDART00000003412	23	1	1	GAACTCTCCCGCTCGGCCGCGGCT	6	-	657	1092
ENSDARG00000001996	ENSDART00000003412	23	1	1	CTCTGCGTCTTCCTCTTCTGGTTCT	7	-	852	1092
ENSDARG00000001996	ENSDART00000003412	23	1	1	CTACCCTGCGACCCATCTGTGTGC	6	-	975	1092
ENSDARG00000001996	ENSDART00000003412	23	1	1	CGCATCCACCGGTCGCAGAGGCT	5	-	309	1092
ENSDARG00000002084	ENSDART00000012166	23	1	1	GCAGGCCACAGGTGGATGATGCT	5	-	147	5340
ENSDARG00000002084	ENSDART00000012166	23	1	1	AGCAGCTTCCATGAGTGCAGCCGTG	7	-	76	5340
ENSDARG00000002084	ENSDART00000012166	23	4	4	CTCTCAATCAACATGGCTGCTGGA	6	-	426	5340
ENSDARG00000002084	ENSDART00000012166	23	4	4	ACACTCACCTCTCCTTCTGTCGAC	6	-	591	5340
ENSDARG00000002084	ENSDART00000012166	23	8	8	TGCTGCCCATGGTGTTGTGAAGGC	6	-	1088	5340
ENSDARG00000002084	ENSDART00000012166	23	8	8	GTTTACAGCTCTCACAGTTGCTGCC	7	-	1105	5340
ENSDARG00000002084	ENSDART00000012166	23	10	10	CTACCAGACATTGGTTGCAGCTGTG	7	-	1456	5340
ENSDARG00000002084	ENSDART00000012166	23	10	10	TGCCTACCAGACATTGGTTGCAGCT	7	-	1459	5340
ENSDARG00000002084	ENSDART00000012166	23	12	12	TTCAGCTTCATAGATGTAGTGGTC	6	-	1651	5340
ENSDARG00000002084	ENSDART00000012166	23	14	14	CTCTTCCCAGTCACGTGGCATCT	5	-	1850	5340
ENSDARG00000002084	ENSDART00000012166	23	15	15	TCCAAACACACTGGCTGAGGCAGAA	7	-	1988	5340
ENSDARG00000002084	ENSDART00000012166	23	15	15	CTCTCCAAACACACTGGCTGAGGCA	7	-	1991	5340
ENSDARG00000002084	ENSDART00000012166	23	15	15	CTCTCCAAACACACTGGCTGAGGC	6	-	1992	5340
ENSDARG00000002084	ENSDART00000012166	23	15	15	CTCCAAACACACTGGCTGAGGCA	5	-	1991	5340
ENSDARG00000002084	ENSDART00000012166	23	16	16	ACACACTTCACTCATCTGCGGAC	5	-	2231	5340
ENSDARG00000002084	ENSDART00000012166	23	17	17	AGCGCCGGCCAGATATGTTGGGCC	6	-	2372	5340
ENSDARG00000002084	ENSDART00000012166	23	18	18	ACAGGCTCCAGTCCTCTGATGGC	5	-	2615	5340
ENSDARG00000002084	ENSDART00000012166	23	20	20	GACCTACTCCGGCAGTTGCGTCGAG	7	-	3050	5340
ENSDARG00000002084	ENSDART00000012166	23	20	20	CACTGCCCACCGGGCTTAGACGGG	6	-	2883	5340
ENSDARG00000002084	ENSDART00000012166	23	20	20	ACCTACTCCGGCAGTTGCGTCGAG	6	-	3050	5340
ENSDARG00000002084	ENSDART00000012166	23	21	21	ACCTCATTACAGGCAGATGTGTAG	6	-	3264	5340
ENSDARG00000002084	ENSDART00000012166	23	22	22	TACCTCGGCATAGCACTCTTGGGTC	7	-	3361	5340
ENSDARG00000002084	ENSDART00000012166	23	25	25	GTTAGCAGCGTTCTTGCGGTTAA	5	-	4094	5340
ENSDARG00000002084	ENSDART00000012166	23	25	25	GTTAAAATCATCTCTCTTTTGGC	5	-	4076	5340
ENSDARG00000002084	ENSDART00000012166	23	26	26	TTATCCAGCTCTTTTTCTGCATGT	6	-	4329	5340
ENSDARG00000002084	ENSDART00000012166	23	27	27	AACTCACGCATGAGGAATTGGCG	5	-	4516	5340
ENSDARG00000002084	ENSDART00000012166	23	28	28	TCCAGCAACAGTTGCTCTGCTTTG	6	-	4701	5340
ENSDARG00000002084	ENSDART00000012166	23	29	29	TGCTGCAGCCTGGGCTCTGCTGGC	6	-	4798	5340
ENSDARG00000002084	ENSDART00000012166	23	30	30	TGCAGCATCCAGGCTGTTGTTGGC	6	-	4981	5340
ENSDARG00000002084	ENSDART00000012166	23	31	31	CTCACCTGCCAGCCTCTGCAGTT	5	-	5201	5340
ENSDARG00000002084	ENSDART00000012166	23	32	32	TCCAGCTGCCTGGCTTTGCCTTC	5	-	5257	5340
ENSDARG00000002240	ENSDART00000024082	23	2	2	AAACTCCACCGCCATGATGGTGGT	6	-	106	696
ENSDARG00000002240	ENSDART00000024082	23	2	2	AACTCCACCGCCATGATGGTGGT	5	-	106	696
ENSDARG00000002240	ENSDART00000024082	23	3	3	TTATCAGTCACCCGGTTGGCGAT	5	-	181	696
ENSDARG00000002240	ENSDART00000024082	23	3	3	GGCAGCAGAAGATGCGGTCGTGGAT	7	-	214	696
ENSDARG00000002240	ENSDART00000024082	23	3	3	AGCGGCAGCAGAAGATGCGGTCGTG	7	-	217	696
ENSDARG00000002240	ENSDART00000024082	23	4	4	ATCAGCTCCTCCCTGTAGCGGTA	5	-	367	696
ENSDARG00000002240	ENSDART00000024082	23	4	4	GTCCCACCCGGCCACGATGATGCC	6	-	394	696
ENSDARG00000002240	ENSDART00000024082	23	6	6	GACCACTCCACCGCTGGAGCCGTC	6	-	604	696
ENSDARG00000002483	ENSDART00000081818	23	4	4	TACGCCATCATCGCAGCAGGAGTG	6	+	340	1059
ENSDARG00000002483	ENSDART00000081818	23	4	4	GCCATCATCGCAGCAGGAGTGGCT	6	+	343	1059
ENSDARG00000002483	ENSDART00000081818	23	5	5	AAATCCCCCAACTACTGCGAAGCG	6	+	835	1059
ENSDARG00000002483	ENSDART00000081818	23	5	5	AAAATCCCCCAACTACTGCGAAGCG	7	+	834	1059
ENSDARG00000002483	ENSDART00000081818	23	5	5	TCCCCCAACTACTGCGAAGCGGAC	6	+	838	1059
ENSDARG00000002483	ENSDART00000081818	23	5	5	TGCAACTGCAAGTTCTTCTGGTGCT	7	+	991	1059
ENSDARG00000002483	ENSDART00000081821	23	2	2	TTCTCCACCGTGTTGGCGCTGGG	5	+	85	1050
ENSDARG00000002483	ENSDART00000081821	23	3	3	GCCATCATCGCAGCAGGAGTGGCT	6	+	334	1050
ENSDARG00000002483	ENSDART00000081821	23	3	3	TACGCCATCATCGCAGCAGGAGTG	6	+	331	1050
ENSDARG00000002483	ENSDART00000081821	23	4	4	TGCAACTGCAAGTTCTTCTGGTGCT	7	+	982	1050
ENSDARG00000002483	ENSDART00000081821	23	4	4	TCCCCCAACTACTGCGAAGCGGAC	6	+	829	1050
ENSDARG00000002483	ENSDART00000081821	23	4	4	AAATCCCCCAACTACTGCGAAGCG	6	+	826	1050
ENSDARG00000002483	ENSDART00000081821	23	4	4	AAAATCCCCCAACTACTGCGAAGCG	7	+	825	1050
ENSDARG00000002536	ENSDART00000006765	23	3	3	ATCAAACTCTCAGTGGAGGAGAG	5	+	280	1881
ENSDARG00000002536	ENSDART00000006765	23	3	3	CCCATCAAACTCTCAGTGGAGGAG	6	+	277	1881
ENSDARG00000002536	ENSDART00000006765	23	5	5	TTCCACAAAGAAAAGTTGGAGGA	5	+	529	1881
ENSDARG00000002536	ENSDART00000006765	23	7	7	TTCTCCATCATCAACTCTGTAGTC	6	+	805	1881
ENSDARG00000002536	ENSDART00000006765	23	7	7	TCCATCATCAACTCTGTAGTCGTG	6	+	808	1881
ENSDARG00000002536	ENSDART00000006765	23	7	7	ATCATCAACTCTGTAGTCGTGGTG	6	+	811	1881
ENSDARG00000002536	ENSDART00000006765	23	8	8	GCCAACTACAACAGAGAAGATGAC	6	+	892	1881
ENSDARG00000002536	ENSDART00000006765	23	10	10	GTTGTCACCATCCAGCCGAGGAG	5	+	1071	1881
ENSDARG00000002536	ENSDART00000006765	23	12	12	TTACCCAGCTGTCGTCTTTGGCA	5	+	1221	1881
ENSDARG00000002536	ENSDART00000006765	23	15	15	CAAATCAGCATTGTGATGGTGTA	5	+	1612	1881
ENSDARG00000002536	ENSDART00000006765	23	17	17	CTACACGGCCCTGATGGTTTTGTCT	7	+	1785	1881
ENSDARG00000002536	ENSDART00000006765	23	17	17	TTCATCCCCTCTCTGCTGTATTT	5	+	1759	1881
ENSDARG00000002536	ENSDART00000006765	23	17	17	CTACACGGCCCTGATGGTTTTGTC	6	+	1785	1881
ENSDARG00000002536	ENSDART00000011554	23	3	3	ATCAAACTCTCAGTGGAGGAGAG	5	+	322	948
ENSDARG00000002536	ENSDART00000011554	23	3	3	CCCATCAAACTCTCAGTGGAGGAG	6	+	319	948
ENSDARG00000002536	ENSDART00000011554	23	5	5	TTCCACAAAGAAAAGTTGGAGGA	5	+	571	948
ENSDARG00000002536	ENSDART00000011554	23	8	8	GTTGTCACCATCCAGCCGAGGAG	5	+	853	948
ENSDARG00000002601	ENSDART00000011627	23	1	1	TGCAAACCCCGTTGATGAAGCAGGC	7	-	12	942
ENSDARG00000002601	ENSDART00000011627	23	1	1	GTTTGCAAACCCCGTTGATGAAGCA	7	-	15	942
ENSDARG00000002601	ENSDART00000011627	23	1	1	GCAAACCCCGTTGATGAAGCAGGC	6	-	12	942
ENSDARG00000002601	ENSDART00000011627	23	2	2	GTCGTCAGCTGGGATGGGACGAT	5	-	296	942
ENSDARG00000002601	ENSDART00000011627	23	2	2	GCCTTCAAAGCGCTGGTGCTTTC	5	-	349	942
ENSDARG00000002601	ENSDART00000011627	23	2	2	TCCGCCAGAGACCAGATCTTAGGTT	7	-	776	942
ENSDARG00000002601	ENSDART00000011627	23	2	2	TTAACCGGCGGCGCGCATTGGCG	5	-	474	942
ENSDARG00000002659	ENSDART00000004474	23	3	2	CCCATCTTCTTAAAGGCAGCTTGC	6	-	243	774
ENSDARG00000002659	ENSDART00000004474	23	5	4	GGCAACGGCCGCCCTCTGTGGTG	5	-	476	774
ENSDARG00000002659	ENSDART00000004474	23	5	4	GGCAACGGCCGCCCTCTGTGGTGCT	7	-	474	774
ENSDARG00000002659	ENSDART00000004474	23	5	4	AACGGCCGCCCTCTGTGGTGCTGTT	7	-	471	774
ENSDARG00000002659	ENSDART00000004474	23	5	4	GCCGCCCTCTGTGGTGCTGTTGGG	6	-	468	774
ENSDARG00000002659	ENSDART00000004474	23	6	5	ACAATCCTCTGCAGGGTTGGGTCT	6	-	690	774
ENSDARG00000002659	ENSDART00000004474	23	6	5	ACAATCCTCTGCAGGGTTGGGTC	5	-	691	774
ENSDARG00000002659	ENSDART00000102752	23	2	2	CCCATCTTCTTAAAGGCAGCTTGC	6	-	243	714
ENSDARG00000002659	ENSDART00000102752	23	5	5	GGCAACGGCCGCCCTCTGTGGTGCT	7	-	462	714
ENSDARG00000002659	ENSDART00000102752	23	5	5	GGCAACGGCCGCCCTCTGTGGTG	5	-	464	714
ENSDARG00000002659	ENSDART00000102752	23	5	5	GCCGCCCTCTGTGGTGCTGTTGGG	6	-	456	714
ENSDARG00000002659	ENSDART00000102752	23	5	5	AACGGCCGCCCTCTGTGGTGCTGTT	7	-	459	714
ENSDARG00000002659	ENSDART00000102752	23	6	6	ACAATCCTCTGCAGGGTTGGGTCT	6	-	678	714
ENSDARG00000002659	ENSDART00000102752	23	6	6	ACAATCCTCTGCAGGGTTGGGTC	5	-	679	714
ENSDARG00000002945	ENSDART00000049836	23	2	2	GGCTGCAGACACTGAGTAGCAGCA	6	-	86	1164
ENSDARG00000002945	ENSDART00000049836	23	3	3	TTCTCCTTCAGTTCTGTGATGCA	5	-	370	1164
ENSDARG00000002945	ENSDART00000049836	23	4	4	TCCACCAGAGATGGGGGAAGGTTTT	7	-	533	1164
ENSDARG00000002945	ENSDART00000049836	23	4	4	CGCAGCTCCACCAGAGATGGGGGA	6	-	540	1164
ENSDARG00000002945	ENSDART00000049836	23	4	4	AGCTCCACCAGAGATGGGGGAAGGT	7	-	536	1164
ENSDARG00000002945	ENSDART00000049836	23	5	5	CTCAAAGCCACTGTTCTGAATAG	5	-	650	1164
ENSDARG00000002945	ENSDART00000049836	23	5	5	CAAAGCCACTGTTCTGAATAGGGT	6	-	647	1164
ENSDARG00000002945	ENSDART00000049836	23	6	6	TGCCTCACCTGTACAGGTGTTTGTA	7	-	823	1164
ENSDARG00000002945	ENSDART00000049836	23	6	6	TGCCTCACCTGTACAGGTGTTTGT	6	-	824	1164
ENSDARG00000002945	ENSDART00000049836	23	7	7	CAATCATGCGGATCTGGTTGAAAC	6	-	851	1164
ENSDARG00000002945	ENSDART00000049836	23	8	8	GTCAGCAACACAGCGGAAGGTGGC	6	-	1117	1164
ENSDARG00000002945	ENSDART00000049836	23	8	8	GCCAAAACCTTGAGGGCAGAAGTC	6	-	1024	1164
ENSDARG00000002945	ENSDART00000049836	23	8	8	TGCCAAAACCTTGAGGGCAGAAGTC	7	-	1024	1164
ENSDARG00000002945	ENSDART00000049836	23	8	8	GACATCCACTTGACTGATGTTGTT	6	-	997	1164
ENSDARG00000002945	ENSDART00000049836	23	8	8	CAACACAGCGGAAGGTGGCAGGC	5	-	1113	1164
ENSDARG00000002945	ENSDART00000049836	23	8	8	AGCAACACAGCGGAAGGTGGCAGGC	7	-	1113	1164
ENSDARG00000002981	ENSDART00000007810	23	1	1	TCCCACAAAAGGAAGAGGTGTTGGA	7	-	150	1332
ENSDARG00000002981	ENSDART00000007810	23	1	1	TCCCACAAAAGGAAGAGGTGTTG	5	-	152	1332
ENSDARG00000002981	ENSDART00000007810	23	1	1	GTTTCCCACAAAAGGAAGAGGTG	5	-	155	1332
ENSDARG00000002981	ENSDART00000007810	23	1	1	CAAGCCCACAGAGGCTAAGTCTAA	6	-	46	1332
ENSDARG00000002981	ENSDART00000007810	23	3	3	CTCTGCTGCCTCCAGGAGTGGTT	5	-	394	1332
ENSDARG00000002981	ENSDART00000007810	23	6	6	GTCCCCATCTGATGGTGGTCGAT	5	-	954	1332
ENSDARG00000002981	ENSDART00000007810	23	6	6	GTTTCCTTCATGAAATGTGGAGTC	6	-	883	1332
ENSDARG00000002981	ENSDART00000007810	23	6	6	GTTTCCTTCATGAAATGTGGAGTCT	7	-	882	1332
ENSDARG00000002981	ENSDART00000007810	23	8	8	AAAGACTCCGGCTTGCTGAATTG	5	-	1300	1332
ENSDARG00000002981	ENSDART00000102944	23	1	1	GTTTCCCACAAAAGGAAGAGGTG	5	-	146	1221
ENSDARG00000002981	ENSDART00000102944	23	1	1	TCCCACAAAAGGAAGAGGTGTTG	5	-	143	1221
ENSDARG00000002981	ENSDART00000102944	23	1	1	TCCCACAAAAGGAAGAGGTGTTGGA	7	-	141	1221
ENSDARG00000002981	ENSDART00000102944	23	1	1	CAAGCCCACAGAGGCTAAGTCTAA	6	-	37	1221
ENSDARG00000002981	ENSDART00000102944	23	3	3	CTCTGCTGCCTCCAGGAGTGGTT	5	-	385	1221
ENSDARG00000002981	ENSDART00000102944	23	6	6	GTTTCCTTCATGAAATGTGGAGTCT	7	-	873	1221
ENSDARG00000002981	ENSDART00000102944	23	6	6	GTTTCCTTCATGAAATGTGGAGTC	6	-	874	1221
ENSDARG00000002981	ENSDART00000102944	23	6	6	GTCCCCATCTGATGGTGGTCGAT	5	-	945	1221
ENSDARG00000002981	ENSDART00000102944	23	7	7	GCCTCATTCATTACCTGAGGAATGT	7	-	1178	1221
ENSDARG00000003113	ENSDART00000019519	23	4	4	CACTCCCTCTTTGGCCTTTGTCTCT	7	-	279	1086
ENSDARG00000003113	ENSDART00000019519	23	5	5	TCCACCACATCATCAGGAGTGATGT	7	-	386	1086
ENSDARG00000003113	ENSDART00000019519	23	5	5	CACCACATCATCAGGAGTGATGT	5	-	386	1086
ENSDARG00000003113	ENSDART00000019519	23	8	8	TACCTCAAAATGCATGTTTTGAT	5	-	776	1086
ENSDARG00000003113	ENSDART00000019519	23	8	8	ACCTCAAAATGCATGTTTTGATGAA	7	-	773	1086
ENSDARG00000003113	ENSDART00000019519	23	10	10	TGCACCACCTCGTAGTCTGAATTC	6	-	930	1086
ENSDARG00000003206	ENSDART00000014865	23	2	2	GTACTCAGCTGTCTGAAGACGTC	5	+	86	717
ENSDARG00000003206	ENSDART00000014865	23	2	2	GAAGACGTCTTACAACGCATGAGGA	7	+	100	717
ENSDARG00000003206	ENSDART00000014865	23	4	4	GCACGCAAAGAGAGAGAGGCAGCG	6	+	316	717
ENSDARG00000003206	ENSDART00000014865	23	4	4	AGAGCCAAACAGCTGGTGAGTCT	5	+	400	717
ENSDARG00000003206	ENSDART00000014865	23	5	5	GAACAAATCACACAGCTTGAGAA	5	+	472	717
ENSDARG00000003206	ENSDART00000014865	23	5	5	AAATCACACAGCTTGAGAAGAAGGT	7	+	476	717
ENSDARG00000003206	ENSDART00000014865	23	6	6	GAACGCTTCAGGATGTCTGCCGAA	6	+	505	717
ENSDARG00000003219	ENSDART00000025196	23	2	1	ACCTTCTCCTGTGCTCTGTTGAA	5	-	82	1389
ENSDARG00000003219	ENSDART00000025196	23	2	1	GGCACCTCCTTTCGAGCTGATGCT	6	-	28	1389
ENSDARG00000003219	ENSDART00000025196	23	7	6	TTCTGCAGCCCTGTCAGCTGATGGC	7	-	479	1389
ENSDARG00000003219	ENSDART00000025196	23	7	6	TCCCTCTTCTTGGCATTCTGCAGCC	7	-	494	1389
ENSDARG00000003219	ENSDART00000025196	23	9	8	GGCTGCAAACGGCTTGGAAGACTGT	7	-	643	1389
ENSDARG00000003219	ENSDART00000025196	23	12	11	GAACTCACATGGCATGAAGCATCT	6	-	1317	1389
ENSDARG00000003219	ENSDART00000025196	23	12	11	TTCCTCTTCTTCTGTGGGATAGTCT	7	-	1014	1389
ENSDARG00000003219	ENSDART00000025196	23	12	11	CCCTTCCACCACTGGTTTGTCTTC	6	-	1090	1389
ENSDARG00000003219	ENSDART00000025196	23	12	11	TTCTTCCTCTTCTTCTGTGGGATAG	7	-	1017	1389
ENSDARG00000003219	ENSDART00000025196	23	12	11	TTCTTCTTCCTCTTCTTCTGTGGGA	7	-	1020	1389
ENSDARG00000003250	ENSDART00000006120	23	3	2	AGCAGCGCCGCCTGTGCGATGTT	5	+	263	3117
ENSDARG00000003250	ENSDART00000006120	23	5	4	AGACCCACAGGACCTGCCGGTGGT	6	+	627	3117
ENSDARG00000003250	ENSDART00000006120	23	6	5	TCCAAACCACCACCGCTGCCTCT	5	+	913	3117
ENSDARG00000003250	ENSDART00000006120	23	6	5	CGCTGCCTCTGAAAAGGGTGAGAA	6	+	926	3117
ENSDARG00000003250	ENSDART00000006120	23	6	5	TTACCCCACATCTGACGATGGTGCA	7	+	815	3117
ENSDARG00000003250	ENSDART00000006120	23	6	5	GTCCAAACCACCACCGCTGCCTCT	6	+	912	3117
ENSDARG00000003250	ENSDART00000006120	23	6	5	TACCCCACATCTGACGATGGTGCA	6	+	816	3117
ENSDARG00000003250	ENSDART00000006120	23	7	6	GCAAAACACATGTTCGCTGTGGTC	6	+	942	3117
ENSDARG00000003250	ENSDART00000006120	23	7	6	CAAAACACATGTTCGCTGTGGTC	5	+	943	3117
ENSDARG00000003250	ENSDART00000006120	23	7	6	ACCTTCTACAGGGAAGTCGAGTAA	6	+	989	3117
ENSDARG00000003250	ENSDART00000006120	23	7	6	AGCAAAACACATGTTCGCTGTGGTC	7	+	941	3117
ENSDARG00000003250	ENSDART00000006120	23	8	7	ACCTGCCCCGTATGAGCCGCCTCT	6	+	1160	3117
ENSDARG00000003250	ENSDART00000006120	23	9	8	GACTACAAAGATCAGCTGAAGAC	5	+	1288	3117
ENSDARG00000003250	ENSDART00000006120	23	12	11	AAACTCCACCGAGTTCTTTGAGGAT	7	+	1563	3117
ENSDARG00000003250	ENSDART00000006120	23	12	11	AACTCCACCGAGTTCTTTGAGGAT	6	+	1564	3117
ENSDARG00000003250	ENSDART00000006120	23	13	12	ATCCGCTGCCTCAGGAAGCTGCC	5	+	1798	3117
ENSDARG00000003250	ENSDART00000006120	23	13	12	CGCTGCCTCAGGAAGCTGCCGTG	5	+	1801	3117
ENSDARG00000003250	ENSDART00000006120	23	14	13	CTCAACAGCGATGATAAGCTGTT	5	+	1813	3117
ENSDARG00000003250	ENSDART00000006120	23	14	13	GAATCATACCTGGACTGCGACTTG	6	+	1873	3117
ENSDARG00000003250	ENSDART00000006120	23	15	14	CCCTCAGTCAGCTTGAGATTTGGAC	7	+	1981	3117
ENSDARG00000003250	ENSDART00000006120	23	16	15	AGCCCAAGCATAATTCTGTGTGAAC	7	+	2215	3117
ENSDARG00000003250	ENSDART00000006120	23	16	15	GCCCAAGCATAATTCTGTGTGAAC	6	+	2216	3117
ENSDARG00000003250	ENSDART00000006120	23	16	15	AAAGTCGGCCAGTCAGAAGGCAAC	6	+	2106	3117
ENSDARG00000003250	ENSDART00000006120	23	19	18	GAATGCAGCCCTATGGATGCCTTT	6	+	2423	3117
ENSDARG00000003250	ENSDART00000006120	23	20	19	GAATTCACCCTTTCGTGTGCAGGC	6	+	2617	3117
ENSDARG00000003250	ENSDART00000006120	23	22	21	AGCCTATAAGATTCTTTGCCGGA	5	+	2883	3117
ENSDARG00000003383	ENSDART00000013797	23	4	3	TTACGCAGCAGAGAAAGACGAGGGT	7	+	282	867
ENSDARG00000003383	ENSDART00000013797	23	4	3	GCCACCTTCATTGCGAGCCTTGGCC	7	+	750	867
ENSDARG00000003383	ENSDART00000013797	23	4	3	CGCAGCAGAGAAAGACGAGGGTTGT	7	+	285	867
ENSDARG00000003383	ENSDART00000013797	23	4	3	CCCCTCTGCACTGGGCCGCCTTC	5	+	368	867
ENSDARG00000003383	ENSDART00000013797	23	4	3	AGCAGCTTAGGAGTGCAGTATCT	5	+	790	867
ENSDARG00000003383	ENSDART00000013797	23	4	3	AGACGCCCATCTCGCGGCTGGTGGC	7	+	563	867
ENSDARG00000003383	ENSDART00000013797	23	4	3	ACACCCCTCTGCACTGGGCCGCC	5	+	365	867
ENSDARG00000003383	ENSDART00000013797	23	4	3	ACACACCTCTCAGCTGGGCAGCG	5	+	464	867
ENSDARG00000003383	ENSDART00000077882	23	2	2	TTACGCAGCAGAGAAAGACGAGGGT	7	+	117	717
ENSDARG00000003383	ENSDART00000077882	23	2	2	GCCACCTTCATTGCGAGCCTTGGCC	7	+	585	717
ENSDARG00000003383	ENSDART00000077882	23	2	2	CGCAGCAGAGAAAGACGAGGGTTGT	7	+	120	717
ENSDARG00000003383	ENSDART00000077882	23	2	2	CCCCTCTGCACTGGGCCGCCTTC	5	+	203	717
ENSDARG00000003383	ENSDART00000077882	23	2	2	AGCAGCTTAGGAGTGCAGTATCT	5	+	625	717
ENSDARG00000003383	ENSDART00000077882	23	2	2	AGACGCCCATCTCGCGGCTGGTGGC	7	+	398	717
ENSDARG00000003383	ENSDART00000077882	23	2	2	ACACCCCTCTGCACTGGGCCGCC	5	+	200	717
ENSDARG00000003383	ENSDART00000077882	23	2	2	ACACACCTCTCAGCTGGGCAGCG	5	+	299	717
ENSDARG00000003469	ENSDART00000021180	23	2	1	TCCTCACCCAATGAATGTAGTAGTG	7	+	739	1041
ENSDARG00000003469	ENSDART00000021180	23	2	1	GACATCACAGATGAGCAGCATTT	5	+	1020	1041
ENSDARG00000003469	ENSDART00000021180	23	2	1	GAAAGCACCCAAAAGGAGAGGCC	5	+	228	1041
ENSDARG00000003469	ENSDART00000021180	23	2	1	ACCAGCAACCTTGTGGCCGGCTGC	6	+	532	1041
ENSDARG00000003469	ENSDART00000021180	23	2	1	AACTTCGCCCTCAAGCAGGAGCC	5	+	814	1041
ENSDARG00000003475	ENSDART00000046933	23	2	1	GTACTCTACCTGATTTAGGATAA	5	-	135	900
ENSDARG00000003475	ENSDART00000046933	23	3	2	GCATGCGCACCTGAGTGGGGGCGCG	7	-	232	900
ENSDARG00000003475	ENSDART00000046933	23	3	2	GCATGCGCACCTGAGTGGGGGCG	5	-	234	900
ENSDARG00000003865	ENSDART00000016901	23	2	2	GTCCAAAGAGAACCGTCTGAATTC	6	-	88	957
ENSDARG00000003865	ENSDART00000016901	23	2	2	TTCATCAAATCGTCCCGGCTTGGAC	7	-	114	957
ENSDARG00000003865	ENSDART00000016901	23	3	3	ACCTTCTCCAAGCCTTGGGGTGTA	6	-	564	957
ENSDARG00000003865	ENSDART00000016901	23	3	3	ACCTTCTCCAAGCCTTGGGGTGTAA	7	-	563	957
ENSDARG00000003865	ENSDART00000016901	23	3	3	GACTGCTGCGAGGGCCGCCGGGGTC	7	-	351	957
ENSDARG00000003865	ENSDART00000104482	23	1	1	TTCATCAAATCGTCCCGGCTTGGAC	7	-	45	885
ENSDARG00000003865	ENSDART00000104482	23	1	1	GTCCAAAGAGAACCGTCTGAATTC	6	-	19	885
ENSDARG00000003865	ENSDART00000104482	23	6	6	ACCTTCTCCAAGCCTTGGGGTGTAA	7	-	491	885
ENSDARG00000003865	ENSDART00000104482	23	6	6	ACCTTCTCCAAGCCTTGGGGTGTA	6	-	492	885
ENSDARG00000004018	ENSDART00000013449	23	2	2	TGCACCTGCTAGCTTTAGGATGT	5	-	683	867
ENSDARG00000004018	ENSDART00000013449	23	2	2	TCCTCAAAAGAGACGTCGTTGCC	5	-	514	867
ENSDARG00000004018	ENSDART00000013449	23	2	2	CTCCTCAAAAGAGACGTCGTTGCC	6	-	514	867
ENSDARG00000004018	ENSDART00000013449	23	2	2	CTCAAAAGAGACGTCGTTGCCTTT	6	-	511	867
ENSDARG00000004018	ENSDART00000013449	23	2	2	ATCGTCCACTATGAGGTGGCGAA	5	-	140	867
ENSDARG00000004018	ENSDART00000013449	23	2	2	AGAGACTAATCTCTCGAAGGGTTC	6	-	379	867
ENSDARG00000004018	ENSDART00000013449	23	2	2	ACAAACTTCAGATATGTGCGTAGAC	7	-	344	867
ENSDARG00000004018	ENSDART00000013449	23	2	2	ACAAACTTCAGATATGTGCGTAG	5	-	346	867
ENSDARG00000004018	ENSDART00000013449	23	2	2	AACTTCAGATATGTGCGTAGACGCT	7	-	341	867
ENSDARG00000004018	ENSDART00000013449	23	2	2	AAACTCCTCAAAAGAGACGTCGTT	6	-	517	867
ENSDARG00000004114	ENSDART00000022498	23	1	1	TACAACTCCATGAAGCGGTCAAC	5	-	1498	3180
ENSDARG00000004114	ENSDART00000022498	23	1	1	GCACACTACAGAACTGTGGCGTC	5	-	2220	3180
ENSDARG00000004114	ENSDART00000022498	23	1	1	GCAAACGCAATCTTTGGGTCTTC	5	-	13	3180
ENSDARG00000004114	ENSDART00000022498	23	1	1	GAAAGCAGACATTTGAGGGATGC	5	-	520	3180
ENSDARG00000004114	ENSDART00000022498	23	1	1	CTCCAATCCCCTCTAGCTGGATAC	6	-	1847	3180
ENSDARG00000004114	ENSDART00000022498	23	1	1	GGCTCCATCGCTCACGCTGCGGAG	6	-	109	3180
ENSDARG00000004114	ENSDART00000022498	23	1	1	GTACAACTCCATGAAGCGGTCAAC	6	-	1498	3180
ENSDARG00000004114	ENSDART00000022498	23	1	1	GTATTCACAAGCCTTGCAGAAGTC	6	-	1993	3180
ENSDARG00000004114	ENSDART00000022498	23	1	1	TACATCGGCCACAAGGGGCAGCA	5	-	2153	3180
ENSDARG00000004114	ENSDART00000022498	23	1	1	TACCAATGCTTCAAGTAGAGGAC	5	-	989	3180
ENSDARG00000004114	ENSDART00000022498	23	1	1	TACTTCCTCTGGGATGGGATTTG	5	-	1387	3180
ENSDARG00000004114	ENSDART00000022498	23	1	1	TACTTCCTCTGGGATGGGATTTGCT	7	-	1385	3180
ENSDARG00000004114	ENSDART00000022498	23	1	1	CGCAACATCATCCAATGCTGCATTG	7	-	1053	3180
ENSDARG00000004114	ENSDART00000022498	23	1	1	CGCTCAAGATGCACTGCTGAAGTT	6	-	1257	3180
ENSDARG00000004114	ENSDART00000022498	23	1	1	TTCCTCAGAGGTCATAGCAGGCTTT	7	-	333	3180
ENSDARG00000004114	ENSDART00000022498	23	1	1	AGCAAATACCTCTCATGTTGTCTTG	7	-	584	3180
ENSDARG00000004114	ENSDART00000022498	23	1	1	TGCAAACGCAATCTTTGGGTCTTC	6	-	13	3180
ENSDARG00000004114	ENSDART00000022498	23	1	1	AGCTGCGACGTTAGCCGATGTGGGT	7	-	72	3180
ENSDARG00000004114	ENSDART00000022498	23	1	1	ATCGGCCACAAGGGGCAGCAGAC	5	-	2150	3180
ENSDARG00000004114	ENSDART00000022498	23	1	1	CAATGCTGCATTGCATCTGTTTTT	6	-	1042	3180
ENSDARG00000004114	ENSDART00000022498	23	1	1	AAATACTTCCTCTGGGATGGGAT	5	-	1390	3180
ENSDARG00000004114	ENSDART00000022498	23	1	1	AAATACCTCTCATGTTGTCTTGGTT	7	-	581	3180
ENSDARG00000004114	ENSDART00000022498	23	3	3	GTCCTCATCAGAAGCAGATGCTGGC	7	-	2436	3180
ENSDARG00000004114	ENSDART00000022498	23	3	3	CACCGCTCCATCACATCTTTTGCA	6	-	2508	3180
ENSDARG00000004114	ENSDART00000022498	23	3	3	AGAAGCAGATGCTGGCGGAGGAA	5	-	2429	3180
ENSDARG00000004114	ENSDART00000022498	23	3	3	CTCATCAGAAGCAGATGCTGGCGGA	7	-	2433	3180
ENSDARG00000004114	ENSDART00000022498	23	5	5	GCCTGCTTCACCAGAGATGCGGTG	6	-	2790	3180
ENSDARG00000004114	ENSDART00000022498	23	5	5	TGCTTCACCAGAGATGCGGTGAG	5	-	2788	3180
ENSDARG00000004114	ENSDART00000022498	23	6	6	AGACACGCCTCCTGCAGTCTGATTG	7	-	2981	3180
ENSDARG00000004114	ENSDART00000022498	23	6	6	ACACGCCTCCTGCAGTCTGATTG	5	-	2981	3180
ENSDARG00000004114	ENSDART00000022498	23	7	7	TCCAGCTCCTGCAGGAGTTTGAGGA	7	-	3164	3180
ENSDARG00000004114	ENSDART00000022498	23	7	7	TCCAGCTCCTGCAGGAGTTTGAG	5	-	3166	3180
ENSDARG00000004114	ENSDART00000022498	23	7	7	AGCTCCTGCAGGAGTTTGAGGAT	5	-	3163	3180
ENSDARG00000004114	ENSDART00000022498	23	7	7	ACAGGCAGCAGTAATGGATGAGGAG	7	-	3092	3180
ENSDARG00000004114	ENSDART00000022498	23	7	7	ACAGGCAGCAGTAATGGATGAGGA	6	-	3093	3180
ENSDARG00000004114	ENSDART00000066851	23	1	1	GTATTCACAAGCCTTGCAGAAGTC	6	-	1993	3186
ENSDARG00000004114	ENSDART00000066851	23	1	1	GGCTCCATCGCTCACGCTGCGGAG	6	-	109	3186
ENSDARG00000004114	ENSDART00000066851	23	1	1	GCACACTACAGAACTGTGGCGTC	5	-	2220	3186
ENSDARG00000004114	ENSDART00000066851	23	1	1	GCAAACGCAATCTTTGGGTCTTC	5	-	13	3186
ENSDARG00000004114	ENSDART00000066851	23	1	1	GAAAGCAGACATTTGAGGGATGC	5	-	520	3186
ENSDARG00000004114	ENSDART00000066851	23	1	1	TACAACTCCATGAAGCGGTCAAC	5	-	1498	3186
ENSDARG00000004114	ENSDART00000066851	23	1	1	TACATCGGCCACAAGGGGCAGCA	5	-	2153	3186
ENSDARG00000004114	ENSDART00000066851	23	1	1	TACCAATGCTTCAAGTAGAGGAC	5	-	989	3186
ENSDARG00000004114	ENSDART00000066851	23	1	1	TACTTCCTCTGGGATGGGATTTG	5	-	1387	3186
ENSDARG00000004114	ENSDART00000066851	23	1	1	TACTTCCTCTGGGATGGGATTTGCT	7	-	1385	3186
ENSDARG00000004114	ENSDART00000066851	23	1	1	TGCAAACGCAATCTTTGGGTCTTC	6	-	13	3186
ENSDARG00000004114	ENSDART00000066851	23	1	1	TTCCTCAGAGGTCATAGCAGGCTTT	7	-	333	3186
ENSDARG00000004114	ENSDART00000066851	23	1	1	CGCTCAAGATGCACTGCTGAAGTT	6	-	1257	3186
ENSDARG00000004114	ENSDART00000066851	23	1	1	CGCAACATCATCCAATGCTGCATTG	7	-	1053	3186
ENSDARG00000004114	ENSDART00000066851	23	1	1	GTACAACTCCATGAAGCGGTCAAC	6	-	1498	3186
ENSDARG00000004114	ENSDART00000066851	23	1	1	CTCCAATCCCCTCTAGCTGGATAC	6	-	1847	3186
ENSDARG00000004114	ENSDART00000066851	23	1	1	AGCTGCGACGTTAGCCGATGTGGGT	7	-	72	3186
ENSDARG00000004114	ENSDART00000066851	23	1	1	ATCGGCCACAAGGGGCAGCAGAC	5	-	2150	3186
ENSDARG00000004114	ENSDART00000066851	23	1	1	CAATGCTGCATTGCATCTGTTTTT	6	-	1042	3186
ENSDARG00000004114	ENSDART00000066851	23	1	1	AAATACTTCCTCTGGGATGGGAT	5	-	1390	3186
ENSDARG00000004114	ENSDART00000066851	23	1	1	AAATACCTCTCATGTTGTCTTGGTT	7	-	581	3186
ENSDARG00000004114	ENSDART00000066851	23	1	1	AGCAAATACCTCTCATGTTGTCTTG	7	-	584	3186
ENSDARG00000004114	ENSDART00000066851	23	4	4	AGAAGCAGATGCTGGCGGAGGAA	5	-	2435	3186
ENSDARG00000004114	ENSDART00000066851	23	4	4	GTCCTCATCAGAAGCAGATGCTGGC	7	-	2442	3186
ENSDARG00000004114	ENSDART00000066851	23	4	4	CACCGCTCCATCACATCTTTTGCA	6	-	2514	3186
ENSDARG00000004114	ENSDART00000066851	23	4	4	CTCATCAGAAGCAGATGCTGGCGGA	7	-	2439	3186
ENSDARG00000004114	ENSDART00000066851	23	6	6	GCCTGCTTCACCAGAGATGCGGTG	6	-	2796	3186
ENSDARG00000004114	ENSDART00000066851	23	6	6	TGCTTCACCAGAGATGCGGTGAG	5	-	2794	3186
ENSDARG00000004114	ENSDART00000066851	23	7	7	AGACACGCCTCCTGCAGTCTGATTG	7	-	2987	3186
ENSDARG00000004114	ENSDART00000066851	23	7	7	ACACGCCTCCTGCAGTCTGATTG	5	-	2987	3186
ENSDARG00000004114	ENSDART00000066851	23	8	8	TCCAGCTCCTGCAGGAGTTTGAGGA	7	-	3170	3186
ENSDARG00000004114	ENSDART00000066851	23	8	8	TCCAGCTCCTGCAGGAGTTTGAG	5	-	3172	3186
ENSDARG00000004114	ENSDART00000066851	23	8	8	ACAGGCAGCAGTAATGGATGAGGA	6	-	3099	3186
ENSDARG00000004114	ENSDART00000066851	23	8	8	ACAGGCAGCAGTAATGGATGAGGAG	7	-	3098	3186
ENSDARG00000004114	ENSDART00000066851	23	8	8	AGCTCCTGCAGGAGTTTGAGGAT	5	-	3169	3186
ENSDARG00000004116	ENSDART00000006596	23	2	1	TTCAGCCACAAATTGGGAGATAAC	6	+	91	1068
ENSDARG00000004116	ENSDART00000006596	23	3	2	AACGTCTACGTGGGAGATGTCTGT	6	+	160	1068
ENSDARG00000004116	ENSDART00000006596	23	6	5	TGCCAAATCCCAGCTGACGTCTTT	6	+	399	1068
ENSDARG00000004116	ENSDART00000006596	23	6	5	GCCAAATCCCAGCTGACGTCTTT	5	+	400	1068
ENSDARG00000004116	ENSDART00000006596	23	6	5	CAACTCAGCTTCTGCAGCTGATTGC	7	+	377	1068
ENSDARG00000004116	ENSDART00000006596	23	6	5	CAAATCCCAGCTGACGTCTTTGAG	6	+	402	1068
ENSDARG00000004116	ENSDART00000006596	23	7	6	GTCGGCAACATTAACATTTGGGTCT	7	+	580	1068
ENSDARG00000004116	ENSDART00000006596	23	7	6	TGCATCCTCATCCGAGAAGTTGGA	6	+	544	1068
ENSDARG00000004116	ENSDART00000006596	23	7	6	ACCATCTTAAAATGGCAGCAGCA	5	+	616	1068
ENSDARG00000004132	ENSDART00000020925	23	2	2	GACTCAAAACCTCGATCTGAAAAC	6	-	99	1026
ENSDARG00000004132	ENSDART00000020925	23	2	2	CCCTTCCACAGCGCCCGTAGCAGAA	7	-	182	1026
ENSDARG00000004132	ENSDART00000020925	23	5	5	ACCTTCTGCTTCTGAGGTAGAGGGA	7	-	548	1026
ENSDARG00000004132	ENSDART00000020925	23	7	7	GACGCCAAAGTAGGAGCTGTTTAG	6	-	674	1026
ENSDARG00000004132	ENSDART00000020925	23	7	7	GAAGACGCCAAAGTAGGAGCTGTT	6	-	677	1026
ENSDARG00000004132	ENSDART00000020925	23	7	7	AGAGGCCTCTCTGTGCTGCTGAC	5	-	653	1026
ENSDARG00000004132	ENSDART00000020925	23	9	9	TCCACCGTCGTGACTGTGCTGTC	5	-	955	1026
ENSDARG00000004218	ENSDART00000018654	23	1	1	CCCCAACCAGCACCAGTTTGCATCT	7	-	46	696
ENSDARG00000004218	ENSDART00000018654	23	2	2	AGCTCCAAACAGGCTGTGTAGTTT	6	-	153	696
ENSDARG00000004218	ENSDART00000018654	23	2	2	AGCTCCAAACAGGCTGTGTAGTT	5	-	154	696
ENSDARG00000004218	ENSDART00000018654	23	2	2	CTCCAAACAGGCTGTGTAGTTTTC	6	-	151	696
ENSDARG00000004218	ENSDART00000018654	23	4	4	GACAGCTCCATCAGTGTGCAAAC	5	-	406	696
ENSDARG00000004218	ENSDART00000018654	23	5	5	GCCTCAGCACCCAACTGTTTGGCC	6	-	474	696
ENSDARG00000004218	ENSDART00000018654	23	5	5	TTCTCCTTCTTGAAGGTGGAAGAG	6	-	660	696
ENSDARG00000004218	ENSDART00000018654	23	5	5	AGCCTCAGCACCCAACTGTTTGGCC	7	-	474	696
ENSDARG00000004218	ENSDART00000018654	23	5	5	ACAGCCGGCGAGTGGGGCTGGGTTT	7	-	595	696
ENSDARG00000004218	ENSDART00000018654	23	5	5	ACAGCCGGCGAGTGGGGCTGGGTT	6	-	596	696
ENSDARG00000004325	ENSDART00000047020	23	1	1	GAAGACGTCTGTGATAAGCTTCT	5	+	76	1308
ENSDARG00000004325	ENSDART00000047020	23	2	2	AGCTCCTTCAAAGCGGAGATGGT	5	+	263	1308
ENSDARG00000004325	ENSDART00000047020	23	2	2	TCCTTCAAAGCGGAGATGGTGTT	5	+	266	1308
ENSDARG00000004325	ENSDART00000047020	23	4	4	TACAGCTTCTGAAACTGTGGTGAG	6	+	441	1308
ENSDARG00000004325	ENSDART00000047020	23	5	5	ATCGACTGCGACAAGCTGGAGAA	5	+	595	1308
ENSDARG00000004325	ENSDART00000047020	23	8	8	TACTCAACATTTCCAGGTTTGTGT	6	+	1087	1308
ENSDARG00000004325	ENSDART00000047020	23	8	8	CTCTCAGCACAGCGTCTGATGAA	5	+	1016	1308
ENSDARG00000004325	ENSDART00000047020	23	8	8	CTACTCAACATTTCCAGGTTTGTGT	7	+	1086	1308
ENSDARG00000004372	ENSDART00000023359	23	1	1	CAACAAGACCACAGAGGAGATTTG	6	+	57	1170
ENSDARG00000004372	ENSDART00000023359	23	2	2	TGCTGCGTCAATACGAGCGGGAGAG	7	+	173	1170
ENSDARG00000004372	ENSDART00000023359	23	2	2	AGCATCATCACGTTTGTGGGCAAC	6	+	277	1170
ENSDARG00000004372	ENSDART00000023359	23	3	3	CTCTCCAAAGTTAAAGAAGATTCT	6	+	372	1170
ENSDARG00000004372	ENSDART00000023359	23	4	4	AACTTCAGAGTCTGGATCTGGTGAG	7	+	461	1170
ENSDARG00000004372	ENSDART00000023359	23	5	5	CTCAGCTGCTAGATACTAAGTCTAC	7	+	476	1170
ENSDARG00000004372	ENSDART00000023359	23	6	6	AGATGCAAAGACAGCGGAGGTGTGC	7	+	753	1170
ENSDARG00000004372	ENSDART00000023359	23	6	6	AGATGCAAAGACAGCGGAGGTGTG	6	+	753	1170
ENSDARG00000004372	ENSDART00000023359	23	7	7	AAACCACACCGCCCTCTGTGTTC	5	+	815	1170
ENSDARG00000004372	ENSDART00000023359	23	7	7	AAAACCACACCGCCCTCTGTGTTC	6	+	814	1170
ENSDARG00000004372	ENSDART00000023359	23	8	8	CAACACGACCCCAAGGTGAAGCC	5	+	952	1170
ENSDARG00000004452	ENSDART00000027255	23	1	1	GCAGGCACCGGGAAACTGCGCGGCG	7	-	105	909
ENSDARG00000004452	ENSDART00000027255	23	4	4	GGCAAAAGCGCGGAAGGGTTTGGGG	7	-	693	909
ENSDARG00000004452	ENSDART00000027255	23	4	4	GGCAAAAGCGCGGAAGGGTTTGGG	6	-	694	909
ENSDARG00000004452	ENSDART00000027255	23	4	4	GAAGGCAAAAGCGCGGAAGGGTTT	6	-	697	909
ENSDARG00000004452	ENSDART00000027255	23	5	5	GTCCTCGCCGCACAGAGACTGGGCA	7	-	744	909
ENSDARG00000004745	ENSDART00000027224	23	4	4	CACGGCCACTGAGAGTGTGAATGT	6	-	205	1473
ENSDARG00000004745	ENSDART00000027224	23	6	6	ACCAACAGACTAAGAAGCAGCAGCA	7	-	470	1473
ENSDARG00000004745	ENSDART00000027224	23	6	6	AGCACCAACAGACTAAGAAGCAGCA	7	-	473	1473
ENSDARG00000004745	ENSDART00000027224	23	10	10	ACACTCAAAAACTCTTTGTTGAGGG	7	-	803	1473
ENSDARG00000004745	ENSDART00000027224	23	10	10	CTCAAAAACTCTTTGTTGAGGGC	5	-	802	1473
ENSDARG00000004745	ENSDART00000027224	23	10	10	CACTCAAAAACTCTTTGTTGAGGGC	7	-	802	1473
ENSDARG00000004745	ENSDART00000027224	23	10	10	CACTCAAAAACTCTTTGTTGAGGG	6	-	803	1473
ENSDARG00000004745	ENSDART00000027224	23	10	10	ACACTCAAAAACTCTTTGTTGAG	5	-	805	1473
ENSDARG00000004745	ENSDART00000027224	23	13	13	GAACCCAGCATTGAGAAGGAGGC	5	-	1024	1473
ENSDARG00000004745	ENSDART00000027224	23	15	15	CAAGGCCCATGTGACTGTGTTGAT	6	-	1351	1473
ENSDARG00000004745	ENSDART00000027224	23	16	16	ACAGTCAGAGGGAGTCTGTGGAGAC	7	-	1400	1473
ENSDARG00000004745	ENSDART00000027224	23	16	16	ACAGTCAGAGGGAGTCTGTGGAG	5	-	1402	1473
ENSDARG00000004803	ENSDART00000013629	23	3	3	CCCTGCACCATTATAGTATGGTAC	6	-	439	729
ENSDARG00000004803	ENSDART00000013629	23	3	3	GTCCAAAGCGGAGCGATGACGTC	5	-	268	729
ENSDARG00000004836	ENSDART00000016515	23	2	2	AGCAGCTTCTGGATTGTTGGGAT	5	-	152	606
ENSDARG00000004836	ENSDART00000016515	23	2	2	AGAGGCCCAGAGAGCCGTATTTGTC	7	-	241	606
ENSDARG00000004836	ENSDART00000016515	23	2	2	ACATTCTCCTCTCCGAATTGTTC	5	-	274	606
ENSDARG00000004836	ENSDART00000016515	23	3	3	AACAGCAGCACAGACAGCAGCAGAA	7	-	373	606
ENSDARG00000004836	ENSDART00000016515	23	5	5	AGAGTCTGCGGTCAGCTGAGTGC	5	-	560	606
ENSDARG00000004836	ENSDART00000016515	23	5	5	GTTGGCGTCTGTCCGGTAGCTGGT	6	-	589	606
ENSDARG00000004843	ENSDART00000055040	23	1	1	TGCATCTGCTGAGGGGTGATGGC	5	-	34	1641
ENSDARG00000004843	ENSDART00000055040	23	2	2	TTCCCAGCATGCTGTTGCTGCAGGA	7	-	191	1641
ENSDARG00000004843	ENSDART00000055040	23	3	3	TGCTGCTGCTGAACGGAGAGTAA	5	-	265	1641
ENSDARG00000004843	ENSDART00000055040	23	9	9	GGCCCATGCTGTGCAGGCTGGTGGG	7	-	937	1641
ENSDARG00000004843	ENSDART00000055040	23	11	11	TTCCACGTCGCTGCGTTGCGTCT	5	-	1165	1641
ENSDARG00000004843	ENSDART00000055040	23	11	11	ACCTTCCACGTCGCTGCGTTGCG	5	-	1168	1641
ENSDARG00000004843	ENSDART00000055040	23	11	11	GTTACCTTCCACGTCGCTGCGTTG	6	-	1170	1641
ENSDARG00000004843	ENSDART00000055040	23	13	13	TTCACCAGAGGAGAGCTGTAGAA	5	-	1303	1641
ENSDARG00000004843	ENSDART00000055040	23	17	17	TCCATCTGCTCCTCTTTGATTTG	5	-	1549	1641
ENSDARG00000004843	ENSDART00000104983	23	1	1	ACATACCTCTGTATGTTGGGTCT	5	-	131	1299
ENSDARG00000004843	ENSDART00000104983	23	2	2	TTCTCACCACTTGCTTGCTGCTGCT	7	-	185	1299
ENSDARG00000004843	ENSDART00000104983	23	2	2	TGCTGCTGCTGCCGCTTCTGTTGTT	7	-	170	1299
ENSDARG00000004843	ENSDART00000104983	23	2	2	TGCTGCTGCCGCTTCTGTTGTTGTT	7	-	167	1299
ENSDARG00000004843	ENSDART00000104983	23	2	2	TGCTGCCGCTTCTGTTGTTGTTGTT	7	-	164	1299
ENSDARG00000004843	ENSDART00000104983	23	2	2	TGCCGCTTCTGTTGTTGTTGTTGAG	7	-	161	1299
ENSDARG00000004843	ENSDART00000104983	23	3	3	TGCATCTGCTGAGGGGTGATGGC	5	-	280	1299
ENSDARG00000004843	ENSDART00000104983	23	4	4	TTCCCAGCATGCTGTTGCTGCAGGA	7	-	437	1299
ENSDARG00000004843	ENSDART00000104983	23	5	5	TGCTGCTGCTGAACGGAGAGTAA	5	-	508	1299
ENSDARG00000004843	ENSDART00000104983	23	10	10	GGCCCATGCTGTGCAGGCTGGTGGG	7	-	1177	1299
ENSDARG00000004843	ENSDART00000104985	23	2	1	ACATACCTCTGTATGTTGGGTCT	5	-	131	1302
ENSDARG00000004843	ENSDART00000104985	23	3	2	TTCTCACCACTTGCTTGCTGCTGCT	7	-	185	1302
ENSDARG00000004843	ENSDART00000104985	23	3	2	TGCTGCTGCTGCCGCTTCTGTTGTT	7	-	170	1302
ENSDARG00000004843	ENSDART00000104985	23	3	2	TGCTGCTGCCGCTTCTGTTGTTGTT	7	-	167	1302
ENSDARG00000004843	ENSDART00000104985	23	3	2	TGCTGCCGCTTCTGTTGTTGTTGTT	7	-	164	1302
ENSDARG00000004843	ENSDART00000104985	23	3	2	TGCCGCTTCTGTTGTTGTTGTTGAG	7	-	161	1302
ENSDARG00000004843	ENSDART00000104985	23	5	4	TGCATCTGCTGAGGGGTGATGGC	5	-	280	1302
ENSDARG00000004843	ENSDART00000104985	23	6	5	TTCCCAGCATGCTGTTGCTGCAGGA	7	-	437	1302
ENSDARG00000004843	ENSDART00000104985	23	7	6	TGCTGCTGCTGAACGGAGAGTAA	5	-	511	1302
ENSDARG00000004843	ENSDART00000104985	23	12	11	GGCCCATGCTGTGCAGGCTGGTGGG	7	-	1180	1302
ENSDARG00000004936	ENSDART00000102420	23	6	5	TTCAACAACTGACCTGTTTGTGGCT	7	+	645	1248
ENSDARG00000004936	ENSDART00000102420	23	6	5	AGCGACCACTTTCAGATGGGGAC	5	+	684	1248
ENSDARG00000004936	ENSDART00000102420	23	6	5	AGACTCCACTTTTCATGATGAAAAC	7	+	612	1248
ENSDARG00000005078	ENSDART00000013768	23	1	1	TTCAGCTGCAGGTTTGGGGCTGCA	6	-	21	681
ENSDARG00000005078	ENSDART00000013768	23	1	1	ATCCTCGACATGGTTGGTGATGTT	6	-	115	681
ENSDARG00000005078	ENSDART00000013768	23	1	1	TTCAGCTGCAGGTTTGGGGCTGC	5	-	22	681
ENSDARG00000005078	ENSDART00000013768	23	1	1	GCCATCCTCGACATGGTTGGTGAT	6	-	118	681
ENSDARG00000005078	ENSDART00000013768	23	3	3	AGCTACACCTCAGGGGGAGGCAGGA	7	-	304	681
ENSDARG00000005078	ENSDART00000013768	23	3	3	TCCAAAAACTCTTTATGTGATGAA	6	-	254	681
ENSDARG00000005078	ENSDART00000013768	23	3	3	CTCCAAAAACTCTTTATGTGATGAA	7	-	254	681
ENSDARG00000005078	ENSDART00000013768	23	3	3	CTACACCTCAGGGGGAGGCAGGA	5	-	304	681
ENSDARG00000005078	ENSDART00000013768	23	4	4	TCCAAACACCTCCCTTTGCATTG	5	-	375	681
ENSDARG00000005078	ENSDART00000013768	23	4	4	TTCCAAACACCTCCCTTTGCATTG	6	-	375	681
ENSDARG00000005350	ENSDART00000019521	23	1	1	GCAGACCGCGGTGTGGATTTGGC	5	+	13	4731
ENSDARG00000005350	ENSDART00000019521	23	1	1	GCAGACCGCGGTGTGGATTTGGCA	6	+	13	4731
ENSDARG00000005350	ENSDART00000019521	23	4	4	TTCCAATGCCCACTAAGCGGCGTTC	7	+	350	4731
ENSDARG00000005350	ENSDART00000019521	23	5	5	TACATCGTCAGCGTCGGAGGATGAG	7	+	417	4731
ENSDARG00000005350	ENSDART00000019521	23	5	5	AACAACCACAGCCAGGGGCAGAC	5	+	598	4731
ENSDARG00000005350	ENSDART00000019521	23	5	5	ATCGTCAGCGTCGGAGGATGAGGGC	7	+	420	4731
ENSDARG00000005350	ENSDART00000019521	23	5	5	ATCGTCAGCGTCGGAGGATGAGGG	6	+	420	4731
ENSDARG00000005350	ENSDART00000019521	23	5	5	AGATACATCGTCAGCGTCGGAGGA	6	+	414	4731
ENSDARG00000005350	ENSDART00000019521	23	7	7	CTCCACTAAAATACAGCAGCTGCT	6	+	831	4731
ENSDARG00000005350	ENSDART00000019521	23	7	7	AGCAGCTGCTTAACACGTTGAAGAG	7	+	845	4731
ENSDARG00000005350	ENSDART00000019521	23	10	10	ATCCCAACAGTGACCCTGGGATGTT	7	+	1232	4731
ENSDARG00000005350	ENSDART00000019521	23	12	12	GGCCTCGTCTCAAGTGGGTGGTC	5	+	1457	4731
ENSDARG00000005350	ENSDART00000019521	23	12	12	CACCGCTTACATAGAGGTGAGTGT	6	+	1548	4731
ENSDARG00000005350	ENSDART00000019521	23	16	16	ACACACAGCTCGTGTTGCTTTGGT	6	+	1818	4731
ENSDARG00000005350	ENSDART00000019521	23	16	16	ACACACAGCTCGTGTTGCTTTGGTG	7	+	1818	4731
ENSDARG00000005350	ENSDART00000019521	23	17	17	GTTTCAGTCGCATGGGCTGAAAC	5	+	1980	4731
ENSDARG00000005350	ENSDART00000019521	23	19	19	TACTACGGCCTGCCTGGGGTGAC	5	+	2299	4731
ENSDARG00000005350	ENSDART00000019521	23	21	21	GTCAAAACCGTTTACAGAGGAAGGT	7	+	2524	4731
ENSDARG00000005350	ENSDART00000019521	23	21	21	GTCTGCTTAGTGTCAGTGGTCGCA	6	+	2453	4731
ENSDARG00000005350	ENSDART00000019521	23	23	23	TTACCCAAAACTCCACTGGGTGGTA	7	+	2722	4731
ENSDARG00000005350	ENSDART00000019521	23	23	23	TACCCAAAACTCCACTGGGTGGTA	6	+	2723	4731
ENSDARG00000005350	ENSDART00000019521	23	23	23	ACCCAAAACTCCACTGGGTGGTA	5	+	2724	4731
ENSDARG00000005350	ENSDART00000019521	23	23	23	CAAAACTCCACTGGGTGGTATTC	5	+	2727	4731
ENSDARG00000005350	ENSDART00000019521	23	24	24	TCCAGCTTCCATCATGGTAGGCAAC	7	+	2874	4731
ENSDARG00000005350	ENSDART00000019521	23	24	24	TCCAGCTTCCATCATGGTAGGCA	5	+	2874	4731
ENSDARG00000005350	ENSDART00000019521	23	25	25	GTTCTCTACATGCTGCTGAATGC	5	+	3031	4731
ENSDARG00000005350	ENSDART00000019521	23	27	27	ATCGCCTCCTTTTATGGCTGTCTGT	7	+	3193	4731
ENSDARG00000005350	ENSDART00000019521	23	28	28	AGAAGCGGCAGCCAGTGTGAATGT	6	+	3363	4731
ENSDARG00000005350	ENSDART00000019521	23	28	28	CACAACGCAGACCCTGATGAAGAC	6	+	3327	4731
ENSDARG00000005350	ENSDART00000019521	23	31	31	TTCCTCCCATGGAGCTGGAGACGTC	7	+	3686	4731
ENSDARG00000005350	ENSDART00000019521	23	32	32	AGAGTCAACCTGGCCATCTGTCTAC	7	+	3970	4731
ENSDARG00000005350	ENSDART00000019521	23	34	34	CTCCTCAGAGTCTGCCGCTGATGGA	7	+	4082	4731
ENSDARG00000005350	ENSDART00000019521	23	34	34	GTCTGCCGCTGATGGAGTCTGGGAC	7	+	4091	4731
ENSDARG00000005350	ENSDART00000019521	23	36	36	GACCACTTCAACACTCGGCTGAGCT	7	+	4261	4731
ENSDARG00000005350	ENSDART00000019521	23	38	38	ATCATCTTATAGTTGGTGTGGTGGT	7	+	4601	4731
ENSDARG00000005350	ENSDART00000019521	23	38	38	ATCATCTTATAGTTGGTGTGGTG	5	+	4601	4731
ENSDARG00000005350	ENSDART00000019521	23	38	38	AGCATCATCTTATAGTTGGTGTG	5	+	4598	4731
ENSDARG00000005464	ENSDART00000048364	23	2	1	GGCTTCAGAATTTGTGCTTTTAAC	6	+	70	903
ENSDARG00000005464	ENSDART00000048364	23	3	2	TCCCACGACTACTTGAGGCAGTC	5	+	215	903
ENSDARG00000005464	ENSDART00000048364	23	3	2	CACGACTACTTGAGGCAGTCAAC	5	+	218	903
ENSDARG00000005464	ENSDART00000048364	23	5	4	TTCTCCAGAGAACCCTTTGTGGTG	6	+	403	903
ENSDARG00000005464	ENSDART00000048364	23	7	6	GACCCCTCCTTCACCTGGCTGATTC	7	+	643	903
ENSDARG00000005464	ENSDART00000104425	23	1	1	GGCTTCAGAATTTGTGCTTTTAAC	6	+	70	945
ENSDARG00000005464	ENSDART00000104425	23	2	2	CACGACTACTTGAGGCAGTCAAC	5	+	218	945
ENSDARG00000005464	ENSDART00000104425	23	2	2	TCCCACGACTACTTGAGGCAGTC	5	+	215	945
ENSDARG00000005464	ENSDART00000104425	23	4	4	TTCTCCAGAGAACCCTTTGTGGTG	6	+	397	945
ENSDARG00000005464	ENSDART00000104425	23	6	6	GACCCCTCCTTCACCTGGCTGATTC	7	+	637	945
ENSDARG00000005464	ENSDART00000104425	23	8	8	GTCTTCTGCCTGCTGTGTTTGTC	5	+	899	945
ENSDARG00000005464	ENSDART00000104429	23	2	2	GGCTTCAGAATTTGTGCTTTTAAC	6	+	82	909
ENSDARG00000005464	ENSDART00000104429	23	3	3	CACGACTACTTGAGGCAGTCAAC	5	+	230	909
ENSDARG00000005464	ENSDART00000104429	23	3	3	TCCCACGACTACTTGAGGCAGTC	5	+	227	909
ENSDARG00000005464	ENSDART00000104429	23	5	5	TTCTCCAGAGAACCCTTTGTGGTG	6	+	415	909
ENSDARG00000005464	ENSDART00000104429	23	7	7	GACCCCTCCTTCACCTGGCTGATTC	7	+	655	909
ENSDARG00000005513	ENSDART00000014723	23	1	1	AGATGCAGCAGCCCCAGGCTGAGAC	7	+	53	645
ENSDARG00000005513	ENSDART00000014723	23	3	3	CAAAGCAAAACAAAGCAGAAGTG	5	+	204	645
ENSDARG00000005513	ENSDART00000014723	23	3	3	AGCTGCAGCCGAAATCGATGAGGAA	7	+	171	645
ENSDARG00000005513	ENSDART00000014723	23	3	3	AGCAAAGCAAAACAAAGCAGAAGTG	7	+	202	645
ENSDARG00000005513	ENSDART00000014723	23	4	4	ACATACATCGTCTTCGGCGAGGCC	6	+	364	645
ENSDARG00000005513	ENSDART00000014723	23	4	4	GTCATCACCAAACCAGATGTCTAC	6	+	322	645
ENSDARG00000005513	ENSDART00000014723	23	5	5	AGACGCCCACAGTACAGGAGGAGAG	7	+	482	645
ENSDARG00000005513	ENSDART00000014723	23	5	5	GACGCCCACAGTACAGGAGGAGAG	6	+	483	645
ENSDARG00000005513	ENSDART00000014723	23	5	5	TTCCCAGCAAGCTCAGTTAGCAGCT	7	+	402	645
ENSDARG00000005775	ENSDART00000022042	23	2	1	GACAACAGCTATCGCGATGATGAC	6	+	130	5862
ENSDARG00000005775	ENSDART00000022042	23	2	1	ACATCCCTCCTGGCATGGTGGCAAC	7	+	221	5862
ENSDARG00000005775	ENSDART00000022042	23	5	4	GTAAAAATCATTGCCCGTGGATTCT	7	+	532	5862
ENSDARG00000005775	ENSDART00000022042	23	7	6	GTCTGCAGCTCTTCATGGGGAATCT	7	+	815	5862
ENSDARG00000005775	ENSDART00000022042	23	9	8	CTCTTCCGCCTCATGACGCAGGA	5	+	1099	5862
ENSDARG00000005775	ENSDART00000022042	23	9	8	TACACCAGCTTTGACAGTTTTGGCT	7	+	1060	5862
ENSDARG00000005775	ENSDART00000022042	23	10	9	GGCTCCTTCTATCTTGTGAATCT	5	+	1204	5862
ENSDARG00000005775	ENSDART00000022042	23	11	10	CGCAACCGCAAGAAGAAGTGGCG	5	+	1486	5862
ENSDARG00000005775	ENSDART00000022042	23	11	10	GAATCAGACGATGGAAGCAGAAGGA	7	+	1561	5862
ENSDARG00000005775	ENSDART00000022042	23	11	10	GCAACCGCAAGAAGAAGTGGCGGCA	7	+	1487	5862
ENSDARG00000005775	ENSDART00000022042	23	11	10	AGAGACGCAACCGCAAGAAGAAGTG	7	+	1481	5862
ENSDARG00000005775	ENSDART00000022042	23	11	10	GCAGGCAAATGCAATGGCGACGTC	6	+	1350	5862
ENSDARG00000005775	ENSDART00000022042	23	11	10	AGACGCAACCGCAAGAAGAAGTG	5	+	1483	5862
ENSDARG00000005775	ENSDART00000022042	23	11	10	GTCAAATCCGAATCAGACGATGGA	6	+	1552	5862
ENSDARG00000005775	ENSDART00000022042	23	12	11	TTCAGCCGCTGTAAAGACGGAGGC	6	+	1699	5862
ENSDARG00000005775	ENSDART00000022042	23	12	11	TTCCTAAGCCCTCAGCGTCGCAGCA	7	+	1789	5862
ENSDARG00000005775	ENSDART00000022042	23	13	12	TTAACCAACACATTGGTTGAAGGT	6	+	2026	5862
ENSDARG00000005775	ENSDART00000022042	23	16	15	GTTGTCGGCATGCAGTTGTTTGGGA	7	+	2587	5862
ENSDARG00000005775	ENSDART00000022042	23	17	16	AACATCATCCTCGGGAGGAAGGT	5	+	2974	5862
ENSDARG00000005775	ENSDART00000022042	23	17	16	GGCTGCTTCCGATGACGATGGTGAG	7	+	2871	5862
ENSDARG00000005775	ENSDART00000022042	23	17	16	AGAATCTTAACACTGAAGATTTC	5	+	3233	5862
ENSDARG00000005775	ENSDART00000022042	23	17	16	TTCAGCAGCGAGTCTGAGGCAGAG	6	+	3253	5862
ENSDARG00000005775	ENSDART00000022042	23	19	18	GCCCGCTACAAGTGTTGCGATGTG	6	+	3415	5862
ENSDARG00000005775	ENSDART00000022042	23	20	19	TACATCTTCATATTGGAGATGTT	5	+	3637	5862
ENSDARG00000005775	ENSDART00000022042	23	20	19	TACTTCACCAATGCTTGGTGCTGGC	7	+	3691	5862
ENSDARG00000005775	ENSDART00000022042	23	20	19	AGACTATTCGAATCATTCTGGAGTA	7	+	3593	5862
ENSDARG00000005775	ENSDART00000022042	23	22	21	GTTTGCCTCATCTTTTGGCTGATTT	7	+	3913	5862
ENSDARG00000005775	ENSDART00000022042	23	22	21	GTAGTCAACGCCTTGGTGGGTGC	5	+	3862	5862
ENSDARG00000005775	ENSDART00000022042	23	22	21	GTAGTCAACGCCTTGGTGGGTGCC	6	+	3862	5862
ENSDARG00000005775	ENSDART00000022042	23	22	21	AAACTACACTGAGGTGCGTTGGAA	6	+	4062	5862
ENSDARG00000005775	ENSDART00000022042	23	22	21	AACAACAAATCTGAGTGCTTTGCG	6	+	4027	5862
ENSDARG00000005775	ENSDART00000022042	23	22	21	CAAAACTACACTGAGGTGCGTTGGA	7	+	4060	5862
ENSDARG00000005775	ENSDART00000022042	23	22	21	AAACTACACTGAGGTGCGTTGGA	5	+	4062	5862
ENSDARG00000005775	ENSDART00000022042	23	22	21	CAAAACTACACTGAGGTGCGTTG	5	+	4060	5862
ENSDARG00000005775	ENSDART00000022042	23	22	21	TGCCTCATCTTTTGGCTGATTTT	5	+	3916	5862
ENSDARG00000005775	ENSDART00000022042	23	22	21	AACGTCAAAATCAACTTTGACAAC	6	+	4087	5862
ENSDARG00000005775	ENSDART00000022042	23	24	23	GTCATCTTCATTATATTTGGCTCT	6	+	4249	5862
ENSDARG00000005775	ENSDART00000022042	23	26	25	AACTTCATCTTTATTGTGGCCTTC	6	+	4594	5862
ENSDARG00000005775	ENSDART00000022042	23	27	26	TGCCTAGACATCCTGTTTGCATTC	6	+	5461	5862
ENSDARG00000005775	ENSDART00000022042	23	27	26	TACTCAGCAGCAGCAGGCTGGAGAA	7	+	5690	5862
ENSDARG00000005775	ENSDART00000022042	23	27	26	TACATCGCCATTATTCTGGAGAA	5	+	5212	5862
ENSDARG00000005775	ENSDART00000022042	23	27	26	AACCACCTCAGCCGGATGGGACGGC	7	+	5034	5862
ENSDARG00000005775	ENSDART00000022042	23	27	26	GCATTCACCAAACGCGTGCTGGGTG	7	+	5479	5862
ENSDARG00000005775	ENSDART00000022042	23	27	26	ACCAAACGCGTGCTGGGTGATAG	5	+	5485	5862
ENSDARG00000005775	ENSDART00000022042	23	27	26	CAATCCTTCCAAAGTGTCTTTTGAG	7	+	5559	5862
ENSDARG00000005775	ENSDART00000022042	23	27	26	CACTACCACCCTGCGCCGCAAAC	5	+	5589	5862
ENSDARG00000005775	ENSDART00000022042	23	27	26	CTCAGCAGCAGCAGGCTGGAGAA	5	+	5692	5862
ENSDARG00000005775	ENSDART00000022042	23	27	26	GACCAAACCTGAGAAGGAGAAGTT	6	+	5784	5862
ENSDARG00000005775	ENSDART00000022042	23	27	26	TGCGGCAACAGATGGAGGAGCGTTT	7	+	5525	5862
ENSDARG00000005775	ENSDART00000103559	23	1	1	GACAACAGCTATCGCGATGATGAC	6	+	130	5874
ENSDARG00000005775	ENSDART00000103559	23	1	1	ACATCCCTCCTGGCATGGTGGCAAC	7	+	221	5874
ENSDARG00000005775	ENSDART00000103559	23	4	4	GTAAAAATCATTGCCCGTGGATTCT	7	+	532	5874
ENSDARG00000005775	ENSDART00000103559	23	6	6	GTCTGCAGCTCTTCATGGGGAATCT	7	+	815	5874
ENSDARG00000005775	ENSDART00000103559	23	8	8	CTCTTCCGCCTCATGACGCAGGA	5	+	1099	5874
ENSDARG00000005775	ENSDART00000103559	23	8	8	TACACCAGCTTTGACAGTTTTGGCT	7	+	1060	5874
ENSDARG00000005775	ENSDART00000103559	23	9	9	GGCTCCTTCTATCTTGTGAATCT	5	+	1204	5874
ENSDARG00000005775	ENSDART00000103559	23	10	10	AGAGACGCAACCGCAAGAAGAAGTG	7	+	1481	5874
ENSDARG00000005775	ENSDART00000103559	23	10	10	GAATCAGACGATGGAAGCAGAAGGA	7	+	1561	5874
ENSDARG00000005775	ENSDART00000103559	23	10	10	GCAACCGCAAGAAGAAGTGGCGGCA	7	+	1487	5874
ENSDARG00000005775	ENSDART00000103559	23	10	10	AGACGCAACCGCAAGAAGAAGTG	5	+	1483	5874
ENSDARG00000005775	ENSDART00000103559	23	10	10	GCAGGCAAATGCAATGGCGACGTC	6	+	1350	5874
ENSDARG00000005775	ENSDART00000103559	23	10	10	CGCAACCGCAAGAAGAAGTGGCG	5	+	1486	5874
ENSDARG00000005775	ENSDART00000103559	23	10	10	GTCAAATCCGAATCAGACGATGGA	6	+	1552	5874
ENSDARG00000005775	ENSDART00000103559	23	11	11	TTCAGCCGCTGTAAAGACGGAGGC	6	+	1699	5874
ENSDARG00000005775	ENSDART00000103559	23	11	11	TTCCTAAGCCCTCAGCGTCGCAGCA	7	+	1789	5874
ENSDARG00000005775	ENSDART00000103559	23	12	12	TTAACCAACACATTGGTTGAAGGT	6	+	2026	5874
ENSDARG00000005775	ENSDART00000103559	23	15	15	GTTGTCGGCATGCAGTTGTTTGGGA	7	+	2587	5874
ENSDARG00000005775	ENSDART00000103559	23	16	16	AACATCATCCTCGGGAGGAAGGT	5	+	2974	5874
ENSDARG00000005775	ENSDART00000103559	23	16	16	TTCAGCAGCGAGTCTGAGGCAGAG	6	+	3253	5874
ENSDARG00000005775	ENSDART00000103559	23	16	16	GGCTGCTTCCGATGACGATGGTGAG	7	+	2871	5874
ENSDARG00000005775	ENSDART00000103559	23	16	16	AGAATCTTAACACTGAAGATTTC	5	+	3233	5874
ENSDARG00000005775	ENSDART00000103559	23	19	19	GCCCGCTACAAGTGTTGCGATGTG	6	+	3436	5874
ENSDARG00000005775	ENSDART00000103559	23	20	20	TACTTCACCAATGCTTGGTGCTGGC	7	+	3712	5874
ENSDARG00000005775	ENSDART00000103559	23	20	20	AGACTATTCGAATCATTCTGGAGTA	7	+	3614	5874
ENSDARG00000005775	ENSDART00000103559	23	20	20	TACATCTTCATATTGGAGATGTT	5	+	3658	5874
ENSDARG00000005775	ENSDART00000103559	23	22	22	GTAGTCAACGCCTTGGTGGGTGC	5	+	3883	5874
ENSDARG00000005775	ENSDART00000103559	23	22	22	GTAGTCAACGCCTTGGTGGGTGCC	6	+	3883	5874
ENSDARG00000005775	ENSDART00000103559	23	22	22	GTTTGCCTCATCTTTTGGCTGATTT	7	+	3934	5874
ENSDARG00000005775	ENSDART00000103559	23	22	22	AAACTACACTGAGGTGCGTTGGA	5	+	4083	5874
ENSDARG00000005775	ENSDART00000103559	23	22	22	AAACTACACTGAGGTGCGTTGGAA	6	+	4083	5874
ENSDARG00000005775	ENSDART00000103559	23	22	22	AACAACAAATCTGAGTGCTTTGCG	6	+	4048	5874
ENSDARG00000005775	ENSDART00000103559	23	22	22	AACGTCAAAATCAACTTTGACAAC	6	+	4108	5874
ENSDARG00000005775	ENSDART00000103559	23	22	22	CAAAACTACACTGAGGTGCGTTG	5	+	4081	5874
ENSDARG00000005775	ENSDART00000103559	23	22	22	CAAAACTACACTGAGGTGCGTTGGA	7	+	4081	5874
ENSDARG00000005775	ENSDART00000103559	23	22	22	TGCCTCATCTTTTGGCTGATTTT	5	+	3937	5874
ENSDARG00000005775	ENSDART00000103559	23	24	24	GTCATCTTCATTATATTTGGCTCT	6	+	4270	5874
ENSDARG00000005775	ENSDART00000103559	23	26	26	AACTTCATCTTTATTGTGGCCTTC	6	+	4615	5874
ENSDARG00000005775	ENSDART00000103559	23	27	27	TGCGGCAACAGATGGAGGAGCGTTT	7	+	5546	5874
ENSDARG00000005775	ENSDART00000103559	23	27	27	TGCCTAGACATCCTGTTTGCATTC	6	+	5482	5874
ENSDARG00000005775	ENSDART00000103559	23	27	27	TACTCAGCAGCAGCAGGCTGGAGAA	7	+	5711	5874
ENSDARG00000005775	ENSDART00000103559	23	27	27	TACATCGCCATTATTCTGGAGAA	5	+	5233	5874
ENSDARG00000005775	ENSDART00000103559	23	27	27	AACCACCTCAGCCGGATGGGACGGC	7	+	5055	5874
ENSDARG00000005775	ENSDART00000103559	23	27	27	ACCAAACGCGTGCTGGGTGATAG	5	+	5506	5874
ENSDARG00000005775	ENSDART00000103559	23	27	27	CAATCCTTCCAAAGTGTCTTTTGAG	7	+	5580	5874
ENSDARG00000005775	ENSDART00000103559	23	27	27	CACTACCACCCTGCGCCGCAAAC	5	+	5610	5874
ENSDARG00000005775	ENSDART00000103559	23	27	27	CTCAGCAGCAGCAGGCTGGAGAA	5	+	5713	5874
ENSDARG00000005775	ENSDART00000103559	23	27	27	GACCAAACCTGAGAAGGAGAAGTT	6	+	5805	5874
ENSDARG00000005775	ENSDART00000103559	23	27	27	GCATTCACCAAACGCGTGCTGGGTG	7	+	5500	5874
ENSDARG00000006019	ENSDART00000005021	23	2	2	CACTGCAGCAGGAGGTGGGGTGTCT	7	-	112	1875
ENSDARG00000006019	ENSDART00000005021	23	2	2	CACTGCAGCAGGAGGTGGGGTGTC	6	-	113	1875
ENSDARG00000006019	ENSDART00000005021	23	2	2	CACTGCAGCAGGAGGTGGGGTGT	5	-	114	1875
ENSDARG00000006019	ENSDART00000005021	23	2	2	CTCGGCAGCACTGCAGCAGGAGGT	6	-	121	1875
ENSDARG00000006019	ENSDART00000005021	23	3	3	TCCAGCCTCTGCCCAGGCAGCATAC	7	-	252	1875
ENSDARG00000006019	ENSDART00000005021	23	6	6	ATCCACTACATAAGTGTTGAAGCT	6	-	634	1875
ENSDARG00000006019	ENSDART00000005021	23	6	6	TGCCCATCCACTACATAAGTGTTG	6	-	639	1875
ENSDARG00000006019	ENSDART00000005021	23	7	7	CGCGTCCTCTTTTGGTGGCTGAGGG	7	-	873	1875
ENSDARG00000006019	ENSDART00000005021	23	7	7	CGCGTCCTCTTTTGGTGGCTGAG	5	-	875	1875
ENSDARG00000006019	ENSDART00000005021	23	9	9	GAAGGCGGCAAAAGTGCTGGCGAA	6	-	1171	1875
ENSDARG00000006019	ENSDART00000005021	23	10	10	TCCTCCAGAGCCATCTGTGAGGGA	6	-	1293	1875
ENSDARG00000006019	ENSDART00000005021	23	12	12	GAACAAACCTTCTTTGGCTAGTTG	6	-	1579	1875
ENSDARG00000006019	ENSDART00000005021	23	13	13	GCACTCGCCACAATAGTGGAGGCA	6	-	1641	1875
ENSDARG00000006174	ENSDART00000004871	23	3	3	TTCACCCACAGCAGCTGAGTGAGGC	7	-	314	978
ENSDARG00000006174	ENSDART00000004871	23	3	3	TCCCTCAAAGCCCTGAAGCAGGT	5	-	350	978
ENSDARG00000006174	ENSDART00000004871	23	3	3	CTCAAAGCCCTGAAGCAGGTTGC	5	-	347	978
ENSDARG00000006174	ENSDART00000004871	23	3	3	CCCTTCACATCAAACAGCCGATTGC	7	-	419	978
ENSDARG00000006174	ENSDART00000004871	23	3	3	AAACTAACCAGTAAGATTGAGGG	5	-	467	978
ENSDARG00000006174	ENSDART00000004871	23	4	4	AGATACAAATGGCGTAAGTTGGG	5	-	589	978
ENSDARG00000006174	ENSDART00000004871	23	4	4	GTCACCAGATTGGTCAGATTTGGAT	7	-	515	978
ENSDARG00000006174	ENSDART00000004871	23	6	6	AAAAGCACAAGTGCCTTTAGTGTTT	7	-	803	978
ENSDARG00000006213	ENSDART00000019365	23	1	1	TTACCCATCGGTGGCTGATGATGGA	7	-	136	747
ENSDARG00000006213	ENSDART00000019365	23	2	2	CACACCGGCTGCACGTAATTTGTG	6	-	357	747
ENSDARG00000006213	ENSDART00000019365	23	4	4	AACTTCAGCTTCCTGGAGAGTGT	5	-	479	747
ENSDARG00000006213	ENSDART00000019365	23	4	4	GCCACCATCTCTGGTTGCAGATTTG	7	-	517	747
ENSDARG00000006213	ENSDART00000032071	23	1	1	GACAAATTATAATTAAGACGAATGT	7	-	19	819
ENSDARG00000006213	ENSDART00000032071	23	1	1	ACAGACAAATTATAATTAAGACGAA	7	-	22	819
ENSDARG00000006213	ENSDART00000032071	23	2	2	TTACCCATCGGTGGCTGATGATGGA	7	-	193	819
ENSDARG00000006213	ENSDART00000032071	23	3	3	TTCTCAGACCATTCTCTGTAAAC	5	-	249	819
ENSDARG00000006213	ENSDART00000032071	23	4	4	CACACCGGCTGCACGTAATTTGTG	6	-	414	819
ENSDARG00000006213	ENSDART00000032071	23	5	5	GCCACCATCTCTGGTTGCAGATTTG	7	-	571	819
ENSDARG00000006213	ENSDART00000032071	23	5	5	AACTTCAGCTTCCTGGAGAGTGT	5	-	533	819
ENSDARG00000006310	ENSDART00000013767	23	1	1	CTCGTCTTCCTCCATCTGTGCCGTG	7	-	183	945
ENSDARG00000006310	ENSDART00000013767	23	2	2	GTTTTCTTCATGAATATAAGTTTAC	7	-	224	945
ENSDARG00000006310	ENSDART00000013767	23	4	4	TTCCACCTCCCAGTAGCTGCGAAC	6	-	553	945
ENSDARG00000006310	ENSDART00000013767	23	4	4	TCCACCTCCCAGTAGCTGCGAAC	5	-	553	945
ENSDARG00000006310	ENSDART00000013767	23	4	4	GACTTCCACCTCCCAGTAGCTGCG	6	-	556	945
ENSDARG00000006310	ENSDART00000013767	23	4	4	CAACCCTCCCTCTGTGCTGGAGAA	6	-	778	945
ENSDARG00000006310	ENSDART00000013767	23	4	4	AACCAACCCTCCCTCTGTGCTGGA	6	-	781	945
ENSDARG00000006310	ENSDART00000013767	23	4	4	AAACCAACCCTCCCTCTGTGCTGGA	7	-	781	945
ENSDARG00000006353	ENSDART00000018301	23	1	1	TCCAAACCACTGATGGGATTTGAAC	7	-	18	2820
ENSDARG00000006353	ENSDART00000018301	23	1	1	TCCAAACCACTGATGGGATTTGAA	6	-	19	2820
ENSDARG00000006353	ENSDART00000018301	23	1	1	TGCTCCAAACCACTGATGGGATTTG	7	-	21	2820
ENSDARG00000006353	ENSDART00000018301	23	1	1	CTCCAAACCACTGATGGGATTTGAA	7	-	19	2820
ENSDARG00000006353	ENSDART00000018301	23	1	1	CTCCAAACCACTGATGGGATTTG	5	-	21	2820
ENSDARG00000006353	ENSDART00000018301	23	2	2	TTCCACAAACTTGGTGAAGTTTTT	6	-	157	2820
ENSDARG00000006353	ENSDART00000018301	23	3	3	GAATCCACCTTGACAGTAGCCTTG	6	-	220	2820
ENSDARG00000006353	ENSDART00000018301	23	9	9	GCAGCCACAGAATAGCCGTAGTA	5	-	589	2820
ENSDARG00000006353	ENSDART00000018301	23	9	9	GGCAGCCACAGAATAGCCGTAGTA	6	-	589	2820
ENSDARG00000006353	ENSDART00000018301	23	11	11	ACCACCAAATGGACTGCTGATGGC	6	-	847	2820
ENSDARG00000006353	ENSDART00000018301	23	12	12	GCCCCAACAATGAGATCTGCAGTC	6	-	1035	2820
ENSDARG00000006353	ENSDART00000018301	23	12	12	TGCCCCAACAATGAGATCTGCAGTC	7	-	1035	2820
ENSDARG00000006353	ENSDART00000018301	23	13	13	TCCCACGGCTTATGGCGCAGACTTT	7	-	1156	2820
ENSDARG00000006353	ENSDART00000018301	23	15	15	TACGGCCCCTTTCTGCTGTTGCT	5	-	1292	2820
ENSDARG00000006353	ENSDART00000018301	23	15	15	TGCAAAGCAGGGAGCTGTGTTTCT	6	-	1332	2820
ENSDARG00000006353	ENSDART00000018301	23	17	17	GTCCAATAAAATCTGGGCCTAGAAC	7	-	1548	2820
ENSDARG00000006353	ENSDART00000018301	23	18	18	GTAGTCGGCCTCTGGTGGTAGGAC	6	-	1723	2820
ENSDARG00000006353	ENSDART00000018301	23	18	18	GTAGTCGGCCTCTGGTGGTAGGA	5	-	1724	2820
ENSDARG00000006353	ENSDART00000018301	23	18	18	GTAAGCGCCGCCTCCGTCGTTTTT	6	-	1681	2820
ENSDARG00000006353	ENSDART00000018301	23	21	21	GACCACTTCACTTTGAGAGTTGTTC	7	-	1953	2820
ENSDARG00000006353	ENSDART00000018301	23	22	22	GTCAGCTTCCAGTTGGGAGGGGGAA	7	-	2051	2820
ENSDARG00000006353	ENSDART00000018301	23	22	22	GTCAGCTTCCAGTTGGGAGGGGGA	6	-	2052	2820
ENSDARG00000006353	ENSDART00000018301	23	25	25	TCCCGCTTCTCAATGTGGTGTTC	5	-	2353	2820
ENSDARG00000006353	ENSDART00000018301	23	29	29	TTAGGCCTCGGATGCAGCCTGAGGT	7	-	2808	2820
ENSDARG00000006353	ENSDART00000103275	23	1	1	GGCAACAGACAAAGGTAGAAGAA	5	-	83	3174
ENSDARG00000006353	ENSDART00000103275	23	1	1	CTCCACATCCAAGTTGAAGGCAAC	6	-	100	3174
ENSDARG00000006353	ENSDART00000103275	23	1	1	AAAGTCCCATTGGAGAGCAGCTTGT	7	-	49	3174
ENSDARG00000006353	ENSDART00000103275	23	1	1	TTCTCCACATCCAAGTTGAAGGC	5	-	103	3174
ENSDARG00000006353	ENSDART00000103275	23	2	2	AGACTCCACGGACAGTAGAAGAC	5	-	274	3174
ENSDARG00000006353	ENSDART00000103275	23	2	2	TCCTCCTTCTGTGATCTTGGGCT	5	-	248	3174
ENSDARG00000006353	ENSDART00000103275	23	3	3	TGCTCCAAACCACTGATGGGATTTG	7	-	390	3174
ENSDARG00000006353	ENSDART00000103275	23	3	3	TCCAAACCACTGATGGGATTTGAAC	7	-	387	3174
ENSDARG00000006353	ENSDART00000103275	23	3	3	CTCCAAACCACTGATGGGATTTGAA	7	-	388	3174
ENSDARG00000006353	ENSDART00000103275	23	3	3	CTCCAAACCACTGATGGGATTTG	5	-	390	3174
ENSDARG00000006353	ENSDART00000103275	23	3	3	TCCAAACCACTGATGGGATTTGAA	6	-	388	3174
ENSDARG00000006353	ENSDART00000103275	23	4	4	TTCCACAAACTTGGTGAAGTTTTT	6	-	526	3174
ENSDARG00000006353	ENSDART00000103275	23	5	5	GAATCCACCTTGACAGTAGCCTTG	6	-	589	3174
ENSDARG00000006353	ENSDART00000103275	23	11	11	GCAGCCACAGAATAGCCGTAGTA	5	-	958	3174
ENSDARG00000006353	ENSDART00000103275	23	11	11	GGCAGCCACAGAATAGCCGTAGTA	6	-	958	3174
ENSDARG00000006353	ENSDART00000103275	23	13	13	ACCACCAAATGGACTGCTGATGGC	6	-	1216	3174
ENSDARG00000006353	ENSDART00000103275	23	14	14	GCCCCAACAATGAGATCTGCAGTC	6	-	1404	3174
ENSDARG00000006353	ENSDART00000103275	23	14	14	TGCCCCAACAATGAGATCTGCAGTC	7	-	1404	3174
ENSDARG00000006353	ENSDART00000103275	23	15	15	TCCCACGGCTTATGGCGCAGACTTT	7	-	1525	3174
ENSDARG00000006353	ENSDART00000103275	23	17	17	TACGGCCCCTTTCTGCTGTTGCT	5	-	1661	3174
ENSDARG00000006353	ENSDART00000103275	23	17	17	TGCAAAGCAGGGAGCTGTGTTTCT	6	-	1701	3174
ENSDARG00000006353	ENSDART00000103275	23	19	19	GTCCAATAAAATCTGGGCCTAGAAC	7	-	1917	3174
ENSDARG00000006353	ENSDART00000103275	23	20	20	GTAGTCGGCCTCTGGTGGTAGGAC	6	-	2092	3174
ENSDARG00000006353	ENSDART00000103275	23	20	20	GTAGTCGGCCTCTGGTGGTAGGA	5	-	2093	3174
ENSDARG00000006353	ENSDART00000103275	23	20	20	GTAAGCGCCGCCTCCGTCGTTTTT	6	-	2050	3174
ENSDARG00000006353	ENSDART00000103275	23	23	23	GACCACTTCACTTTGAGAGTTGTTC	7	-	2322	3174
ENSDARG00000006353	ENSDART00000103275	23	24	24	GTCAGCTTCCAGTTGGGAGGGGGAA	7	-	2420	3174
ENSDARG00000006353	ENSDART00000103275	23	24	24	GTCAGCTTCCAGTTGGGAGGGGGA	6	-	2421	3174
ENSDARG00000006353	ENSDART00000103275	23	26	26	TCCCGCTTCTCAATGTGGTGTTC	5	-	2707	3174
ENSDARG00000006353	ENSDART00000103275	23	30	30	TTAGGCCTCGGATGCAGCCTGAGGT	7	-	3162	3174
ENSDARG00000006375	ENSDART00000019111	23	4	4	TCCTCAATCAGCTCATTTGAGTTC	6	-	345	1116
ENSDARG00000006375	ENSDART00000019111	23	5	5	GTCGACTCCTCTTCTGGTGCTGCA	6	-	480	1116
ENSDARG00000006375	ENSDART00000019111	23	7	7	CGCTGCCTCAATTCCAGAGGAATCT	7	-	662	1116
ENSDARG00000006375	ENSDART00000019111	23	7	7	TCCCTCTCCAGTAAAGGCTTTGAA	6	-	760	1116
ENSDARG00000006375	ENSDART00000019111	23	8	8	AGAGACACCAGCTCTGGAGTGGCA	6	-	798	1116
ENSDARG00000006375	ENSDART00000019111	23	9	9	GTCAGCTCCTTGTTGGGGAAGGT	5	-	1039	1116
ENSDARG00000006375	ENSDART00000019111	23	9	9	AGCCGCTGCACGATGACGGCGTT	5	-	1099	1116
ENSDARG00000006375	ENSDART00000019111	23	9	9	TCCGTCAGCTCCTTGTTGGGGAA	5	-	1042	1116
ENSDARG00000006584	ENSDART00000026314	23	3	3	GTAAAACACGCTGATGTTGGATTG	6	+	214	2634
ENSDARG00000006584	ENSDART00000026314	23	6	6	GACACCAAAGATCGTGAGGAAGCT	6	+	639	2634
ENSDARG00000006584	ENSDART00000026314	23	6	6	ACAGACTTCCACATTGACTTTGGA	6	+	754	2634
ENSDARG00000006584	ENSDART00000026314	23	6	6	GACTTCCACATTGACTTTGGAGGA	6	+	757	2634
ENSDARG00000006584	ENSDART00000026314	23	7	7	TTCATCCTCCAATCAGAATGAGCT	6	+	873	2634
ENSDARG00000006584	ENSDART00000026314	23	7	7	TTCGCCCCACTGCTGCTAATTTGTC	7	+	830	2634
ENSDARG00000006584	ENSDART00000026314	23	7	7	CCCCACTGCTGCTAATTTGTCTCT	6	+	834	2634
ENSDARG00000006584	ENSDART00000026314	23	12	12	CCCAAAGCCAAAGGAGGCATTTGGA	7	+	1491	2634
ENSDARG00000006584	ENSDART00000026314	23	12	12	TTCAGCAGAACATCGGCAGGAGCG	6	+	1367	2634
ENSDARG00000006584	ENSDART00000026314	23	12	12	GCCCAAAGCCAAAGGAGGCATTT	5	+	1490	2634
ENSDARG00000006584	ENSDART00000026314	23	12	12	AAAGCCAAAGGAGGCATTTGGAGGA	7	+	1494	2634
ENSDARG00000006584	ENSDART00000026314	23	13	13	ACCTCAAACATTTTAAGGTTTGGGG	7	+	1642	2634
ENSDARG00000006584	ENSDART00000026314	23	15	15	CTCCTCTTCTTCGCCTCTTAGGAA	6	+	1863	2634
ENSDARG00000006584	ENSDART00000026314	23	15	15	AACCCCTCCACCACGCCGTAGGC	5	+	1998	2634
ENSDARG00000006584	ENSDART00000026314	23	15	15	AAACCCCTCCACCACGCCGTAGGC	6	+	1997	2634
ENSDARG00000006584	ENSDART00000026314	23	17	17	GTAAAAGGCGGAGCAGGTGGGATTT	7	+	2179	2634
ENSDARG00000006584	ENSDART00000026314	23	18	18	GCACGCCACCTCAGTGATGATGAA	6	+	2497	2634
ENSDARG00000006584	ENSDART00000026314	23	18	18	CACGCCACCTCAGTGATGATGAA	5	+	2498	2634
ENSDARG00000006584	ENSDART00000026314	23	19	19	GTATCCATCACTAGAGTCTGATGAG	7	+	2574	2634
ENSDARG00000006603	ENSDART00000019455	23	3	2	TACGGCTACGGCGCTGGTGCAGGA	6	+	217	576
ENSDARG00000006603	ENSDART00000019455	23	3	2	GGCTACGGCTACGGCGCTGGTGCA	6	+	214	576
ENSDARG00000006603	ENSDART00000019455	23	3	2	AAAGGCTACGGCTACGGCGCTGGT	6	+	211	576
ENSDARG00000006838	ENSDART00000010119	23	2	1	AAATCAACCACCACTGGGCATCT	5	+	67	1389
ENSDARG00000006838	ENSDART00000010119	23	2	1	CTCATCTACAAATGTGGAGGAATTG	7	+	88	1389
ENSDARG00000006838	ENSDART00000010119	23	2	1	GAAATCAACCACCACTGGGCATCT	6	+	66	1389
ENSDARG00000006838	ENSDART00000010119	23	3	2	ATCTCACTCTGGAAGTTTGAGAC	5	+	232	1389
ENSDARG00000006838	ENSDART00000010119	23	5	4	GTCTTCCACTACAAGATGTCTAC	5	+	749	1389
ENSDARG00000006838	ENSDART00000010119	23	6	5	TTCTCCGGCCCAGTATGGTGGTGAC	7	+	821	1389
ENSDARG00000006838	ENSDART00000010119	23	7	6	CCCAAAAGCCTGAAGTCTGGAGAT	6	+	1180	1389
ENSDARG00000007149	ENSDART00000020296	23	2	1	GTACTCACATCTGGATGGGATGTT	6	-	121	3813
ENSDARG00000007149	ENSDART00000020296	23	2	1	CTCACCTGCTGTTTTTGTGACGTG	6	-	18	3813
ENSDARG00000007149	ENSDART00000020296	23	2	1	CCCTGCTGCTCACCTGCTGTTTTT	6	-	26	3813
ENSDARG00000007149	ENSDART00000020296	23	2	1	AGCCACTGCTAGCAGAAGGAGAG	5	-	74	3813
ENSDARG00000007149	ENSDART00000020296	23	4	3	GGCATCACAGGTGAGCGTGATGT	5	-	212	3813
ENSDARG00000007149	ENSDART00000020296	23	4	3	GTCATCAGCCGAAAAGGTGGTGAC	6	-	190	3813
ENSDARG00000007149	ENSDART00000020296	23	7	6	GAATCACACGCTCATTTTGCTGAA	6	-	584	3813
ENSDARG00000007149	ENSDART00000020296	23	8	7	TTCCGCACCACTGAGTTTGCTGCA	6	-	738	3813
ENSDARG00000007149	ENSDART00000020296	23	9	8	ACCTTCCACCGTGACTCTGTAGGT	6	-	1021	3813
ENSDARG00000007149	ENSDART00000020296	23	9	8	TGCTCATGCCCTGTGGATTGGTT	5	-	993	3813
ENSDARG00000007149	ENSDART00000020296	23	9	8	TGCTCATGCCCTGTGGATTGGTTG	6	-	992	3813
ENSDARG00000007149	ENSDART00000020296	23	11	10	AAAAACCGCAGTGTCGCTGAGTTC	6	-	1234	3813
ENSDARG00000007149	ENSDART00000020296	23	11	10	AAAACCGCAGTGTCGCTGAGTTC	5	-	1234	3813
ENSDARG00000007149	ENSDART00000020296	23	13	12	ACATCAAGCTCAGCGGTGATGGT	5	-	1564	3813
ENSDARG00000007149	ENSDART00000020296	23	14	13	GTACTCGCAGGTGAGGGTTGCCGGT	7	-	1644	3813
ENSDARG00000007149	ENSDART00000020296	23	14	13	GAATTCGCAGAGCCAGAGGAGGCT	6	-	1610	3813
ENSDARG00000007149	ENSDART00000020296	23	14	13	TTCCTCCACTGGACTTGAGGGAGGT	7	-	1688	3813
ENSDARG00000007149	ENSDART00000020296	23	15	14	TTCCACCTCAGGTATTATGAGGG	5	-	1772	3813
ENSDARG00000007149	ENSDART00000020296	23	21	20	CACAACAAATGTGGTTTTTGGCT	5	-	2636	3813
ENSDARG00000007149	ENSDART00000020296	23	21	20	TCCTTCTCCTTTATAGTTGAAGAC	6	-	2734	3813
ENSDARG00000007149	ENSDART00000020296	23	21	20	ACCTCCTTCTGGAGTGAAGAATAA	6	-	2776	3813
ENSDARG00000007149	ENSDART00000020296	23	21	20	GTCGTCACAACAAATGTGGTTTTT	6	-	2640	3813
ENSDARG00000007149	ENSDART00000020296	23	21	20	GTCGTCACAACAAATGTGGTTTT	5	-	2641	3813
ENSDARG00000007149	ENSDART00000020296	23	21	20	ACAGCCAGATTGTAATGGGAGAAC	6	-	2706	3813
ENSDARG00000007149	ENSDART00000020296	23	22	21	CTATCCAACATCAAAGATGATGGA	6	-	2808	3813
ENSDARG00000007149	ENSDART00000020296	23	22	21	TCCAACATCAAAGATGATGGAGGA	6	-	2805	3813
ENSDARG00000007149	ENSDART00000020296	23	24	23	GAATTCCACGTTCCTCTGTCTTT	5	-	3158	3813
ENSDARG00000007149	ENSDART00000103723	23	1	1	GTCATCAGCCGAAAAGGTGGTGAC	6	-	40	3747
ENSDARG00000007149	ENSDART00000103723	23	1	1	GGCATCACAGGTGAGCGTGATGT	5	-	62	3747
ENSDARG00000007149	ENSDART00000103723	23	4	4	GAATCACACGCTCATTTTGCTGAA	6	-	434	3747
ENSDARG00000007149	ENSDART00000103723	23	5	5	TTCCGCACCACTGAGTTTGCTGCA	6	-	633	3747
ENSDARG00000007149	ENSDART00000103723	23	6	6	ACCTTCCACCGTGACTCTGTAGGT	6	-	916	3747
ENSDARG00000007149	ENSDART00000103723	23	6	6	TGCTCATGCCCTGTGGATTGGTTG	6	-	887	3747
ENSDARG00000007149	ENSDART00000103723	23	6	6	TGCTCATGCCCTGTGGATTGGTT	5	-	888	3747
ENSDARG00000007149	ENSDART00000103723	23	8	8	AAAACCGCAGTGTCGCTGAGTTC	5	-	1129	3747
ENSDARG00000007149	ENSDART00000103723	23	8	8	AAAAACCGCAGTGTCGCTGAGTTC	6	-	1129	3747
ENSDARG00000007149	ENSDART00000103723	23	10	10	ACATCAAGCTCAGCGGTGATGGT	5	-	1459	3747
ENSDARG00000007149	ENSDART00000103723	23	11	11	GAATTCGCAGAGCCAGAGGAGGCT	6	-	1505	3747
ENSDARG00000007149	ENSDART00000103723	23	11	11	TTCCTCCACTGGACTTGAGGGAGGT	7	-	1583	3747
ENSDARG00000007149	ENSDART00000103723	23	11	11	GTACTCGCAGGTGAGGGTTGCCGGT	7	-	1539	3747
ENSDARG00000007149	ENSDART00000103723	23	12	12	TTCCACCTCAGGTATTATGAGGG	5	-	1667	3747
ENSDARG00000007149	ENSDART00000103723	23	18	18	TCCTTCTCCTTTATAGTTGAAGAC	6	-	2632	3747
ENSDARG00000007149	ENSDART00000103723	23	18	18	GTCGTCACAACAAATGTGGTTTTT	6	-	2538	3747
ENSDARG00000007149	ENSDART00000103723	23	18	18	GTCGTCACAACAAATGTGGTTTT	5	-	2539	3747
ENSDARG00000007149	ENSDART00000103723	23	18	18	CACAACAAATGTGGTTTTTGGCT	5	-	2534	3747
ENSDARG00000007149	ENSDART00000103723	23	18	18	ACCTCCTTCTGGAGTGAAGAATAA	6	-	2674	3747
ENSDARG00000007149	ENSDART00000103723	23	18	18	ACAGCCAGATTGTAATGGGAGAAC	6	-	2604	3747
ENSDARG00000007149	ENSDART00000103723	23	19	19	TCCAACATCAAAGATGATGGAGGA	6	-	2703	3747
ENSDARG00000007149	ENSDART00000103723	23	19	19	CTATCCAACATCAAAGATGATGGA	6	-	2706	3747
ENSDARG00000007149	ENSDART00000103723	23	21	21	AGACACTAAAACAAGTGGCAGGT	5	-	3011	3747
ENSDARG00000007149	ENSDART00000103723	23	22	22	GAATTCCACGTTCCTCTGTCTTT	5	-	3104	3747
ENSDARG00000007149	ENSDART00000103728	23	4	4	GAATCACACGCTCATTTTGCTGAA	6	-	371	3600
ENSDARG00000007149	ENSDART00000103728	23	5	5	TTCCGCACCACTGAGTTTGCTGCA	6	-	525	3600
ENSDARG00000007149	ENSDART00000103728	23	6	6	TGCTCATGCCCTGTGGATTGGTTG	6	-	779	3600
ENSDARG00000007149	ENSDART00000103728	23	6	6	TGCTCATGCCCTGTGGATTGGTT	5	-	780	3600
ENSDARG00000007149	ENSDART00000103728	23	6	6	ACCTTCCACCGTGACTCTGTAGGT	6	-	808	3600
ENSDARG00000007149	ENSDART00000103728	23	8	8	AAAAACCGCAGTGTCGCTGAGTTC	6	-	1021	3600
ENSDARG00000007149	ENSDART00000103728	23	8	8	AAAACCGCAGTGTCGCTGAGTTC	5	-	1021	3600
ENSDARG00000007149	ENSDART00000103728	23	10	10	ACATCAAGCTCAGCGGTGATGGT	5	-	1351	3600
ENSDARG00000007149	ENSDART00000103728	23	11	11	TTCCTCCACTGGACTTGAGGGAGGT	7	-	1475	3600
ENSDARG00000007149	ENSDART00000103728	23	11	11	GAATTCGCAGAGCCAGAGGAGGCT	6	-	1397	3600
ENSDARG00000007149	ENSDART00000103728	23	11	11	GTACTCGCAGGTGAGGGTTGCCGGT	7	-	1431	3600
ENSDARG00000007149	ENSDART00000103728	23	12	12	TTCCACCTCAGGTATTATGAGGG	5	-	1559	3600
ENSDARG00000007149	ENSDART00000103728	23	18	18	TCCTTCTCCTTTATAGTTGAAGAC	6	-	2521	3600
ENSDARG00000007149	ENSDART00000103728	23	18	18	GTCGTCACAACAAATGTGGTTTTT	6	-	2427	3600
ENSDARG00000007149	ENSDART00000103728	23	18	18	ACCTCCTTCTGGAGTGAAGAATAA	6	-	2563	3600
ENSDARG00000007149	ENSDART00000103728	23	18	18	GTCGTCACAACAAATGTGGTTTT	5	-	2428	3600
ENSDARG00000007149	ENSDART00000103728	23	18	18	ACAGCCAGATTGTAATGGGAGAAC	6	-	2493	3600
ENSDARG00000007149	ENSDART00000103728	23	18	18	CACAACAAATGTGGTTTTTGGCT	5	-	2423	3600
ENSDARG00000007149	ENSDART00000103728	23	19	19	TCCAACATCAAAGATGATGGAGGA	6	-	2592	3600
ENSDARG00000007149	ENSDART00000103728	23	19	19	CTATCCAACATCAAAGATGATGGA	6	-	2595	3600
ENSDARG00000007149	ENSDART00000103728	23	21	21	GAATTCCACGTTCCTCTGTCTTT	5	-	2948	3600
ENSDARG00000007149	ENSDART00000103731	23	1	1	GTACTCACATCTGGATGGGATGTT	6	-	121	3813
ENSDARG00000007149	ENSDART00000103731	23	1	1	CTCACCTGCTGTTTTTGTGACGTG	6	-	18	3813
ENSDARG00000007149	ENSDART00000103731	23	1	1	CCCTGCTGCTCACCTGCTGTTTTT	6	-	26	3813
ENSDARG00000007149	ENSDART00000103731	23	1	1	AGCCACTGCTAGCAGAAGGAGAG	5	-	74	3813
ENSDARG00000007149	ENSDART00000103731	23	3	3	GGCATCACAGGTGAGCGTGATGT	5	-	212	3813
ENSDARG00000007149	ENSDART00000103731	23	3	3	GTCATCAGCCGAAAAGGTGGTGAC	6	-	190	3813
ENSDARG00000007149	ENSDART00000103731	23	6	6	GAATCACACGCTCATTTTGCTGAA	6	-	584	3813
ENSDARG00000007149	ENSDART00000103731	23	7	7	TTCCGCACCACTGAGTTTGCTGCA	6	-	738	3813
ENSDARG00000007149	ENSDART00000103731	23	8	8	ACCTTCCACCGTGACTCTGTAGGT	6	-	1021	3813
ENSDARG00000007149	ENSDART00000103731	23	8	8	TGCTCATGCCCTGTGGATTGGTTG	6	-	992	3813
ENSDARG00000007149	ENSDART00000103731	23	8	8	TGCTCATGCCCTGTGGATTGGTT	5	-	993	3813
ENSDARG00000007149	ENSDART00000103731	23	10	10	AAAACCGCAGTGTCGCTGAGTTC	5	-	1234	3813
ENSDARG00000007149	ENSDART00000103731	23	10	10	AAAAACCGCAGTGTCGCTGAGTTC	6	-	1234	3813
ENSDARG00000007149	ENSDART00000103731	23	12	12	ACATCAAGCTCAGCGGTGATGGT	5	-	1564	3813
ENSDARG00000007149	ENSDART00000103731	23	13	13	GAATTCGCAGAGCCAGAGGAGGCT	6	-	1610	3813
ENSDARG00000007149	ENSDART00000103731	23	13	13	TTCCTCCACTGGACTTGAGGGAGGT	7	-	1688	3813
ENSDARG00000007149	ENSDART00000103731	23	13	13	GTACTCGCAGGTGAGGGTTGCCGGT	7	-	1644	3813
ENSDARG00000007149	ENSDART00000103731	23	14	14	TTCCACCTCAGGTATTATGAGGG	5	-	1772	3813
ENSDARG00000007149	ENSDART00000103731	23	20	20	ACCTCCTTCTGGAGTGAAGAATAA	6	-	2776	3813
ENSDARG00000007149	ENSDART00000103731	23	20	20	TCCTTCTCCTTTATAGTTGAAGAC	6	-	2734	3813
ENSDARG00000007149	ENSDART00000103731	23	20	20	CACAACAAATGTGGTTTTTGGCT	5	-	2636	3813
ENSDARG00000007149	ENSDART00000103731	23	20	20	GTCGTCACAACAAATGTGGTTTTT	6	-	2640	3813
ENSDARG00000007149	ENSDART00000103731	23	20	20	GTCGTCACAACAAATGTGGTTTT	5	-	2641	3813
ENSDARG00000007149	ENSDART00000103731	23	20	20	ACAGCCAGATTGTAATGGGAGAAC	6	-	2706	3813
ENSDARG00000007149	ENSDART00000103731	23	21	21	TCCAACATCAAAGATGATGGAGGA	6	-	2805	3813
ENSDARG00000007149	ENSDART00000103731	23	21	21	CTATCCAACATCAAAGATGATGGA	6	-	2808	3813
ENSDARG00000007149	ENSDART00000103731	23	23	23	GAATTCCACGTTCCTCTGTCTTT	5	-	3158	3813
ENSDARG00000007216	ENSDART00000015777	23	4	3	GTTTCCTTCTCCAGGTTGCTTGGCA	7	-	233	1797
ENSDARG00000007216	ENSDART00000015777	23	5	4	CAAATCTCCCCAGGTTTGGTTTC	5	-	390	1797
ENSDARG00000007216	ENSDART00000015777	23	6	5	TTCTGCAGCTCAGAGCCGCGGAA	5	-	448	1797
ENSDARG00000007216	ENSDART00000015777	23	7	6	CACACCAGCTCTTCTGTCTTGGTG	6	-	588	1797
ENSDARG00000007216	ENSDART00000015777	23	11	10	CTCTCCTTCGGTGATGGTGAGTG	5	-	1091	1797
ENSDARG00000007216	ENSDART00000015777	23	11	10	CACCTCCTCTTCAGCTGCCGTCTCT	7	-	1011	1797
ENSDARG00000007216	ENSDART00000015777	23	11	10	CTCTCCTTCGGTGATGGTGAGTGT	6	-	1090	1797
ENSDARG00000007216	ENSDART00000015777	23	11	10	GAACTCTCCTTCGGTGATGGTGAG	6	-	1093	1797
ENSDARG00000007216	ENSDART00000015777	23	11	10	TTCACCTCCTCTTCAGCTGCCGTC	6	-	1014	1797
ENSDARG00000007216	ENSDART00000015777	23	11	10	TTCTCCGTCGGCACGTAGCCGTC	5	-	949	1797
ENSDARG00000007216	ENSDART00000015777	23	12	11	GTTTTCACCTCCTCCGTCTGGTTT	6	-	1198	1797
ENSDARG00000007216	ENSDART00000015777	23	12	11	TTCACCTCCTCCGTCTGGTTTGAG	6	-	1195	1797
ENSDARG00000007216	ENSDART00000015777	23	12	11	GCAAGCATCCTGATGAAGGTGGT	5	-	1165	1797
ENSDARG00000007216	ENSDART00000015777	23	12	11	CACCTCCTCCGTCTGGTTTGAGGCC	7	-	1192	1797
ENSDARG00000007216	ENSDART00000015777	23	12	11	CACCTCCTCCGTCTGGTTTGAGGC	6	-	1193	1797
ENSDARG00000007216	ENSDART00000015777	23	12	11	ACCTCCTCCGTCTGGTTTGAGGCC	6	-	1192	1797
ENSDARG00000007216	ENSDART00000015777	23	12	11	ACCTCCTCCGTCTGGTTTGAGGC	5	-	1193	1797
ENSDARG00000007216	ENSDART00000015777	23	12	11	GTTTTCACCTCCTCCGTCTGGTTTG	7	-	1197	1797
ENSDARG00000007216	ENSDART00000015777	23	15	14	AGATACACATCCGCTGGTTTGCC	5	-	1438	1797
ENSDARG00000007216	ENSDART00000015777	23	15	14	AAAGCCAGAGCCACGCGCTGCAGCT	7	-	1406	1797
ENSDARG00000007216	ENSDART00000015777	23	16	15	TTCTTCGCATGAAGGATGAATCT	5	-	1525	1797
ENSDARG00000007216	ENSDART00000015777	23	16	15	TGCTCCACCACAAATGCAGTCTTC	6	-	1545	1797
ENSDARG00000007436	ENSDART00000031379	23	2	2	AACTGCCCCTCCTTTGTAAGCCTGC	7	-	345	1008
ENSDARG00000007436	ENSDART00000031379	23	2	2	ATCCCATAACATCTGCGGGAGCA	5	-	188	1008
ENSDARG00000007436	ENSDART00000031379	23	7	7	AAAGTCATCTTAACTGTTTTGGA	5	-	727	1008
ENSDARG00000007436	ENSDART00000031379	23	7	7	AAAGTCATCTTAACTGTTTTGGAC	6	-	726	1008
ENSDARG00000007436	ENSDART00000031379	23	7	7	TCCTCATTATTAGTGGTGTTTTT	5	-	628	1008
ENSDARG00000007436	ENSDART00000031379	23	8	8	GCCAACAGCATCAGGATGGTGAA	5	-	847	1008
ENSDARG00000007751	ENSDART00000023944	23	1	1	GCCTCACGCGCCTGCAGGAGAAGGA	7	+	110	1752
ENSDARG00000007751	ENSDART00000023944	23	1	1	GCCAACTACATCGAGCGGGTGCG	5	+	163	1752
ENSDARG00000007751	ENSDART00000023944	23	1	1	AACTACATCGAGCGGGTGCGGCA	5	+	166	1752
ENSDARG00000007751	ENSDART00000023944	23	2	2	GCACAAACCGGAGGCTGGAGACGGA	7	+	494	1752
ENSDARG00000007751	ENSDART00000023944	23	2	2	GAACGCTAAAGAAGCCGATTTTGCC	7	+	459	1752
ENSDARG00000007751	ENSDART00000023944	23	3	3	CGCTGCAGAAGCTGAAGACGCAGCT	7	+	560	1752
ENSDARG00000007751	ENSDART00000023944	23	3	3	AGATGCTCCGTCGAGTCGATGCT	5	+	593	1752
ENSDARG00000007751	ENSDART00000023944	23	3	3	TGCTCCGTCGAGTCGATGCTGAA	5	+	596	1752
ENSDARG00000007751	ENSDART00000023944	23	4	4	GTCGACAGAAAGAGTTTGAGGGT	5	+	731	1752
ENSDARG00000007751	ENSDART00000023944	23	5	5	GAAAACGCCAAGCAGACGGCGGT	5	+	850	1752
ENSDARG00000007751	ENSDART00000023944	23	5	5	ACAACCTGCAGAAACAGGTGACGCT	7	+	956	1752
ENSDARG00000007751	ENSDART00000023944	23	5	5	CGCCAAGCAGACGGCGGTGAAGAA	6	+	855	1752
ENSDARG00000007751	ENSDART00000023944	23	6	6	GTCTGCAGATGCAGGAGCAGCTGGA	7	+	1082	1752
ENSDARG00000007751	ENSDART00000023944	23	6	6	TCCGTCTGCAGATGCAGGAGCAGCT	7	+	1079	1752
ENSDARG00000007751	ENSDART00000023944	23	6	6	TGCAGCAGACTCTGGAGCATGAGCG	7	+	1004	1752
ENSDARG00000007751	ENSDART00000023944	23	6	6	GCCTACCGCAAGATGCTGGAGGG	5	+	1159	1752
ENSDARG00000007751	ENSDART00000023944	23	6	6	CTCTCAGCAGCAGCAGGAGATGGC	6	+	1050	1752
ENSDARG00000007751	ENSDART00000023944	23	6	6	AACGCCTACCGCAAGATGCTGGA	5	+	1156	1752
ENSDARG00000007751	ENSDART00000023944	23	6	6	AGCAGCAGCAGGAGATGGCGGCGCT	7	+	1055	1752
ENSDARG00000007751	ENSDART00000023944	23	6	6	CGCTCCGTCTGCAGATGCAGGAGCA	7	+	1076	1752
ENSDARG00000007751	ENSDART00000023944	23	6	6	CTCAGCAGCAGCAGGAGATGGCGGC	7	+	1052	1752
ENSDARG00000007751	ENSDART00000023944	23	8	8	CCCCTCACCGTGTGTGATGAATGC	6	+	1467	1752
ENSDARG00000007751	ENSDART00000023944	23	9	9	TCCTCAGCACTCATCAGTCGTGGGG	7	+	1556	1752
ENSDARG00000007751	ENSDART00000102899	23	1	1	GCCTCACGCGCCTGCAGGAGAAGGA	7	+	110	1749
ENSDARG00000007751	ENSDART00000102899	23	1	1	GCCAACTACATCGAGCGGGTGCG	5	+	163	1749
ENSDARG00000007751	ENSDART00000102899	23	1	1	AACTACATCGAGCGGGTGCGGCA	5	+	166	1749
ENSDARG00000007751	ENSDART00000102899	23	2	2	GAACGCTAAAGAAGCCGATTTTGCC	7	+	459	1749
ENSDARG00000007751	ENSDART00000102899	23	2	2	GCACAAACCGGAGGCTGGAGACGGA	7	+	494	1749
ENSDARG00000007751	ENSDART00000102899	23	3	3	CGCTGCAGAAGCTGAAGACGCAGCT	7	+	560	1749
ENSDARG00000007751	ENSDART00000102899	23	3	3	AGATGCTCCGTCGAGTCGATGCT	5	+	593	1749
ENSDARG00000007751	ENSDART00000102899	23	3	3	TGCTCCGTCGAGTCGATGCTGAA	5	+	596	1749
ENSDARG00000007751	ENSDART00000102899	23	5	5	GTCGACAGAAAGAGTTTGAGGGT	5	+	731	1749
ENSDARG00000007751	ENSDART00000102899	23	6	6	CGCCAAGCAGACGGCGGTGAAGAA	6	+	855	1749
ENSDARG00000007751	ENSDART00000102899	23	6	6	GAAAACGCCAAGCAGACGGCGGT	5	+	850	1749
ENSDARG00000007751	ENSDART00000102899	23	6	6	ACAACCTGCAGAAACAGGTGACGCT	7	+	956	1749
ENSDARG00000007751	ENSDART00000102899	23	7	7	GTCTGCAGATGCAGGAGCAGCTGGA	7	+	1079	1749
ENSDARG00000007751	ENSDART00000102899	23	7	7	TCCGTCTGCAGATGCAGGAGCAGCT	7	+	1076	1749
ENSDARG00000007751	ENSDART00000102899	23	7	7	TGCAGCAGACTCTGGAGCATGAGCG	7	+	1001	1749
ENSDARG00000007751	ENSDART00000102899	23	7	7	GCCTACCGCAAGATGCTGGAGGG	5	+	1156	1749
ENSDARG00000007751	ENSDART00000102899	23	7	7	CTCTCAGCAGCAGCAGGAGATGGC	6	+	1047	1749
ENSDARG00000007751	ENSDART00000102899	23	7	7	AACGCCTACCGCAAGATGCTGGA	5	+	1153	1749
ENSDARG00000007751	ENSDART00000102899	23	7	7	AGCAGCAGCAGGAGATGGCGGCGCT	7	+	1052	1749
ENSDARG00000007751	ENSDART00000102899	23	7	7	CGCTCCGTCTGCAGATGCAGGAGCA	7	+	1073	1749
ENSDARG00000007751	ENSDART00000102899	23	7	7	CTCAGCAGCAGCAGGAGATGGCGGC	7	+	1049	1749
ENSDARG00000007751	ENSDART00000102899	23	9	9	CCCCTCACCGTGTGTGATGAATGC	6	+	1464	1749
ENSDARG00000007751	ENSDART00000102899	23	10	10	TCCTCAGCACTCATCAGTCGTGGGG	7	+	1553	1749
ENSDARG00000007867	ENSDART00000024695	23	3	3	TGCCCCAGATGACCTCTGCTTAC	5	+	188	510
ENSDARG00000007988	ENSDART00000035290	23	2	2	CCCAAACGCTAATGGAAGCAGGG	5	-	35	2052
ENSDARG00000007988	ENSDART00000035290	23	2	2	AGCCCAAACGCTAATGGAAGCAGGG	7	-	35	2052
ENSDARG00000007988	ENSDART00000035290	23	3	3	ACATGCTGCTGGTGGCAGAATAG	5	-	315	2052
ENSDARG00000007988	ENSDART00000035290	23	3	3	GAAGACTACCGACATGCTGCTGGT	6	-	325	2052
ENSDARG00000007988	ENSDART00000035290	23	4	4	CTCCCCATCAACACTGCTTAGGCA	6	-	421	2052
ENSDARG00000007988	ENSDART00000035290	23	5	5	CACAGCGACTCATCTTGGGGTAAAC	7	-	607	2052
ENSDARG00000007988	ENSDART00000035290	23	5	5	GAAGCCTTCCATTAGACTGATAG	5	-	638	2052
ENSDARG00000007988	ENSDART00000035290	23	8	8	CCCTCAGGCATGTAGCTTGATAA	5	-	1026	2052
ENSDARG00000007988	ENSDART00000035290	23	9	9	TGCTCCAACATCCATTGAGTAGAAC	7	-	1179	2052
ENSDARG00000007988	ENSDART00000035290	23	11	11	ACCCCATAATACCCAGCCTGAGCG	6	-	1980	2052
ENSDARG00000007988	ENSDART00000035290	23	11	11	AAACACACAGGCATGACGGCTTT	5	-	1624	2052
ENSDARG00000007988	ENSDART00000035290	23	11	11	GCAAACACACAGGCATGACGGCTTT	7	-	1624	2052
ENSDARG00000007988	ENSDART00000035290	23	11	11	GCCAACTACTGCCTCGTTGTCGTG	6	-	1498	2052
ENSDARG00000007988	ENSDART00000035290	23	11	11	ACCTTCCCCACATCATTAGCCTTC	6	-	1674	2052
ENSDARG00000008010	ENSDART00000020616	23	1	1	ACCGACATCCGAACGCTCTGGTGCC	7	+	671	792
ENSDARG00000008107	ENSDART00000018738	23	1	1	CCCTCCACCGGTGGACTGCGGTTAG	7	-	119	1623
ENSDARG00000008107	ENSDART00000018738	23	4	4	TTACTCTTCAGCCTGGATGGAGTC	6	-	454	1623
ENSDARG00000008107	ENSDART00000018738	23	5	5	TTCTCCAGATTCAAGAGCAGTCGCT	7	-	509	1623
ENSDARG00000008107	ENSDART00000018738	23	6	6	ACCAGCTGCTGTAATGTGCTGAA	5	-	691	1623
ENSDARG00000008107	ENSDART00000018738	23	7	7	ACACACGTCAGTCAGGGAGTGGCA	6	-	745	1623
ENSDARG00000008107	ENSDART00000018738	23	8	8	TGCACCAGCTTCTCATGCCGGAGCT	7	-	980	1623
ENSDARG00000008107	ENSDART00000018738	23	8	8	ACCAGCTTCTCATGCCGGAGCTTCT	7	-	977	1623
ENSDARG00000008107	ENSDART00000018738	23	10	10	GTTATCGCCCACCAGGATGTTGGC	6	-	1201	1623
ENSDARG00000008107	ENSDART00000018738	23	11	11	GCACCCTGCCTTTGGTGGTGAGCT	6	-	1394	1623
ENSDARG00000008107	ENSDART00000018738	23	11	11	CACGTCAGATTTGATGGTGAAGCG	6	-	1345	1623
ENSDARG00000008107	ENSDART00000018738	23	12	12	TGCGCCAGCAGGTCAGCATGAGCT	6	-	1511	1623
ENSDARG00000008107	ENSDART00000102843	23	2	1	CCCTCCACCGGTGGACTGCGGTTAG	7	-	119	1602
ENSDARG00000008107	ENSDART00000102843	23	4	3	TTACTCTTCAGCCTGGATGGAGTC	6	-	433	1602
ENSDARG00000008107	ENSDART00000102843	23	5	4	TTCTCCAGATTCAAGAGCAGTCGCT	7	-	488	1602
ENSDARG00000008107	ENSDART00000102843	23	6	5	ACCAGCTGCTGTAATGTGCTGAA	5	-	670	1602
ENSDARG00000008107	ENSDART00000102843	23	7	6	ACACACGTCAGTCAGGGAGTGGCA	6	-	724	1602
ENSDARG00000008107	ENSDART00000102843	23	8	7	TGCACCAGCTTCTCATGCCGGAGCT	7	-	959	1602
ENSDARG00000008107	ENSDART00000102843	23	8	7	ACCAGCTTCTCATGCCGGAGCTTCT	7	-	956	1602
ENSDARG00000008107	ENSDART00000102843	23	10	9	GTTATCGCCCACCAGGATGTTGGC	6	-	1180	1602
ENSDARG00000008107	ENSDART00000102843	23	11	10	CACGTCAGATTTGATGGTGAAGCG	6	-	1324	1602
ENSDARG00000008107	ENSDART00000102843	23	11	10	GCACCCTGCCTTTGGTGGTGAGCT	6	-	1373	1602
ENSDARG00000008107	ENSDART00000102843	23	12	11	TGCGCCAGCAGGTCAGCATGAGCT	6	-	1490	1602
ENSDARG00000008237	ENSDART00000003296	23	4	4	ATCAGCAACGATGAGGTGAGTTT	5	+	442	1545
ENSDARG00000008237	ENSDART00000003296	23	6	6	AGCTCAGCCAGTTTGACGAGGAG	5	+	725	1545
ENSDARG00000008237	ENSDART00000003296	23	7	7	ACCTGCTTCAGACAGGAAGTGGGC	6	+	904	1545
ENSDARG00000008237	ENSDART00000003296	23	7	7	TGCTTCAGACAGGAAGTGGGCTCT	6	+	907	1545
ENSDARG00000008237	ENSDART00000003296	23	8	8	GTCAACATCGTGTCAGGTTTGTTC	6	+	1093	1545
ENSDARG00000008237	ENSDART00000003296	23	9	9	GTAAAAAGCTGGATTTAGAGGCT	5	+	1130	1545
ENSDARG00000008237	ENSDART00000003296	23	11	11	GAAACCACAAAGAAGCAGAAGAA	5	+	1444	1545
ENSDARG00000008237	ENSDART00000003296	23	11	11	AGAAACATCAGGGCGGCGATGCT	5	+	1490	1545
ENSDARG00000008263	ENSDART00000010270	23	1	1	ATCGGCAGCTCCAGTGGAGGAGCT	6	+	211	1602
ENSDARG00000008263	ENSDART00000010270	23	1	1	GGCAGCTCCAGTGGAGGAGCTTTC	6	+	214	1602
ENSDARG00000008263	ENSDART00000010270	23	2	2	TCCCTCATCATCTCTGTGGTTTTT	6	+	280	1602
ENSDARG00000008263	ENSDART00000010270	23	2	2	TCCCTCATCATCTCTGTGGTTTT	5	+	280	1602
ENSDARG00000008263	ENSDART00000010270	23	2	2	CTCATCATCTCTGTGGTTTTTTC	5	+	283	1602
ENSDARG00000008263	ENSDART00000010270	23	3	3	CTCTCAGGCCCGGTGGAGGAGAG	5	+	613	1602
ENSDARG00000008263	ENSDART00000010270	23	5	5	TTCAGCTGCTGTACGGATGGTGC	5	+	844	1602
ENSDARG00000008263	ENSDART00000010270	23	5	5	TTCAGCTGCTGTACGGATGGTGCT	6	+	844	1602
ENSDARG00000008263	ENSDART00000010270	23	5	5	TTCTCATCCACATTTTTGGTGGT	5	+	893	1602
ENSDARG00000008263	ENSDART00000010270	23	7	7	GTTTTCCCCTGCTTAGTGGCCTAC	6	+	1219	1602
ENSDARG00000008263	ENSDART00000010270	23	7	7	ACAAACAGAGTGTTTCTGTTTGT	5	+	1162	1602
ENSDARG00000008434	ENSDART00000012507	23	2	1	TTCGGCCCCAGTTGACGCCGTCGCG	7	-	412	714
ENSDARG00000008434	ENSDART00000012507	23	2	1	CCCCCAGACCCATTTGTTTGACGCT	7	-	239	714
ENSDARG00000008434	ENSDART00000012507	23	2	1	AGCGCCTCCTTCACTGCGTCTAG	5	-	265	714
ENSDARG00000008434	ENSDART00000012507	23	2	1	AGCCCCATCAGTCCGATTTGTGTCT	7	-	102	714
ENSDARG00000008434	ENSDART00000012507	23	2	1	AGCCCCATCAGTCCGATTTGTGT	5	-	104	714
ENSDARG00000008434	ENSDART00000104485	23	2	1	AGCCCCATCAGTCCGATTTGTGT	5	-	104	714
ENSDARG00000008434	ENSDART00000104485	23	2	1	AGCCCCATCAGTCCGATTTGTGTCT	7	-	102	714
ENSDARG00000008434	ENSDART00000104485	23	2	1	AGCGCCTCCTTCACTGCGTCTAG	5	-	265	714
ENSDARG00000008434	ENSDART00000104485	23	2	1	CCCCCAGACCCATTTGTTTGACGCT	7	-	239	714
ENSDARG00000008434	ENSDART00000104485	23	2	1	TTCGGCCCCAGTTGACGCCGTCGCG	7	-	412	714
ENSDARG00000008541	ENSDART00000012571	23	5	5	ACCCCAACCTGAAAACTCTGTTGGC	7	+	314	1485
ENSDARG00000008541	ENSDART00000012571	23	7	7	CACTGCTGCAGTGGCTGCTGGGAA	6	+	594	1485
ENSDARG00000008541	ENSDART00000012571	23	7	7	GACTCATGCTCACTGCTGCAGTG	5	+	584	1485
ENSDARG00000008541	ENSDART00000012571	23	9	9	ACATACACCAGAGAAGCTGGATTC	6	+	928	1485
ENSDARG00000008541	ENSDART00000012571	23	9	9	GTCATCTGCAGTCAGTGGAGTTG	5	+	873	1485
ENSDARG00000008541	ENSDART00000012571	23	9	9	GTCATCTGCAGTCAGTGGAGTTGGA	7	+	873	1485
ENSDARG00000008541	ENSDART00000012571	23	10	10	TGCAACAAAAGGACAGGAGTGGGT	6	+	1026	1485
ENSDARG00000008541	ENSDART00000012571	23	10	10	TGCAACAAAAGGACAGGAGTGGGTG	7	+	1026	1485
ENSDARG00000008541	ENSDART00000104597	23	3	3	ACCCCAACCTGAAAACTCTGTTGGC	7	+	269	1170
ENSDARG00000008541	ENSDART00000104597	23	5	5	GACTCATGCTCACTGCTGCAGTG	5	+	539	1170
ENSDARG00000008541	ENSDART00000104597	23	5	5	CACTGCTGCAGTGGCTGCTGGGAA	6	+	549	1170
ENSDARG00000008541	ENSDART00000104597	23	7	7	ACATACACCAGAGAAGCTGGATTC	6	+	883	1170
ENSDARG00000008541	ENSDART00000104597	23	7	7	GTCATCTGCAGTCAGTGGAGTTG	5	+	828	1170
ENSDARG00000008541	ENSDART00000104597	23	7	7	GTCATCTGCAGTCAGTGGAGTTGGA	7	+	828	1170
ENSDARG00000008541	ENSDART00000104597	23	8	8	TGCAACAAAAGGACAGGAGTGGGT	6	+	981	1170
ENSDARG00000008541	ENSDART00000104597	23	8	8	TGCAACAAAAGGACAGGAGTGGGTG	7	+	981	1170
ENSDARG00000008788	ENSDART00000017902	23	5	4	GCCTCAAGCACCTGTCTGATAAC	5	-	367	1308
ENSDARG00000008788	ENSDART00000017902	23	5	4	CTCACCGCCTGAAACTCTGATGAG	6	-	289	1308
ENSDARG00000008788	ENSDART00000017902	23	6	5	GTTTTCATCAGGGCTGTAGTAGAG	6	-	448	1308
ENSDARG00000008788	ENSDART00000017902	23	7	6	AGCCAACACTTCAGGAGCTGTGGGC	7	-	552	1308
ENSDARG00000008788	ENSDART00000017902	23	7	6	GTCAACAGCTTTACTGTAGGGTTT	6	-	580	1308
ENSDARG00000008788	ENSDART00000017902	23	8	7	TGCCCCTTCATGATCTTAGAAAAC	6	-	681	1308
ENSDARG00000008788	ENSDART00000017902	23	8	7	CTCACCAGACTCAGAGATGTCGTC	6	-	730	1308
ENSDARG00000008788	ENSDART00000017902	23	9	8	TTAAAACGCATCTTAGGATTTTTC	6	-	777	1308
ENSDARG00000008788	ENSDART00000017902	23	9	8	TTAAAACGCATCTTAGGATTTTTCT	7	-	776	1308
ENSDARG00000008788	ENSDART00000017902	23	11	10	CCCTTCTCCGCTATGGTGAGGGT	5	-	1183	1308
ENSDARG00000008788	ENSDART00000017902	23	11	10	AGCAGCTTCTTGCGGACGGATTC	5	-	1048	1308
ENSDARG00000008788	ENSDART00000017902	23	12	11	GCAAACACCAGTCTGCAGGTTCT	5	-	1286	1308
ENSDARG00000008788	ENSDART00000017902	23	12	11	AGCAAACACCAGTCTGCAGGTTCT	6	-	1286	1308
ENSDARG00000008895	ENSDART00000040312	23	3	3	TTCTTCTTCTTCTTTTGTGAGTGT	6	-	357	2829
ENSDARG00000008895	ENSDART00000040312	23	3	3	TCCTGCACCACGTCCAGATGCTGAC	7	-	296	2829
ENSDARG00000008895	ENSDART00000040312	23	4	4	CTCGACAGAGATGATGCTGCCGGG	6	-	607	2829
ENSDARG00000008895	ENSDART00000040312	23	4	4	TACCTCGACAGAGATGATGCTGCC	6	-	610	2829
ENSDARG00000008895	ENSDART00000040312	23	4	4	CTATACCTCGACAGAGATGATGCT	6	-	613	2829
ENSDARG00000008895	ENSDART00000040312	23	5	5	TGCTGCCACTGACGGCTGCTGTG	5	-	743	2829
ENSDARG00000008895	ENSDART00000040312	23	6	6	GCCTCCAGAGGAAATGCAGCGGGA	6	-	864	2829
ENSDARG00000008895	ENSDART00000040312	23	9	9	AGCCCCTGCTCGACTGTGGCGCG	5	-	1222	2829
ENSDARG00000008895	ENSDART00000040312	23	10	10	ACCTTCGCAGCATGAGTTTGGGGT	6	-	1448	2829
ENSDARG00000008895	ENSDART00000040312	23	10	10	GACTCAACAGAGTTTTGAGGATGTC	7	-	1396	2829
ENSDARG00000008895	ENSDART00000040312	23	10	10	CTCAACAGAGTTTTGAGGATGTC	5	-	1396	2829
ENSDARG00000008895	ENSDART00000040312	23	10	10	ACCTTCGCAGCATGAGTTTGGGGTT	7	-	1447	2829
ENSDARG00000008895	ENSDART00000040312	23	12	12	TACTCCACATCTTCCCGCAGCAGTC	7	-	1649	2829
ENSDARG00000008895	ENSDART00000040312	23	12	12	CTCCACATCTTCCCGCAGCAGTC	5	-	1649	2829
ENSDARG00000008895	ENSDART00000040312	23	12	12	AACTGCGTCCACTGGGCCTTTGTC	6	-	1591	2829
ENSDARG00000008895	ENSDART00000040312	23	12	12	CACATCTTCCCGCAGCAGTCTGT	5	-	1646	2829
ENSDARG00000008895	ENSDART00000040312	23	13	13	TCCTTCACCTGTGTGATGGTGTC	5	-	1756	2829
ENSDARG00000008895	ENSDART00000040312	23	13	13	AGATGCACAGAGTCTGCAGAGGGT	6	-	1824	2829
ENSDARG00000008895	ENSDART00000040312	23	13	13	TTCTCCTTCACCTGTGTGATGGT	5	-	1759	2829
ENSDARG00000008895	ENSDART00000040312	23	16	16	AACTGCCCCGTCTGTGTTTGGGAA	6	-	2117	2829
ENSDARG00000008895	ENSDART00000040312	23	16	16	AACTGCCCCGTCTGTGTTTGGGA	5	-	2118	2829
ENSDARG00000008895	ENSDART00000040312	23	16	16	TCCATCTTCCAACATCGGCGTCTCT	7	-	2037	2829
ENSDARG00000008895	ENSDART00000040312	23	16	16	ACAGACAGCAGGCGTGTGAGGTA	5	-	2185	2829
ENSDARG00000008895	ENSDART00000040312	23	16	16	TGCCCCGTCTGTGTTTGGGAAGCT	6	-	2114	2829
ENSDARG00000008895	ENSDART00000040312	23	16	16	CTCTCAAACTGCCCCGTCTGTGTTT	7	-	2122	2829
ENSDARG00000008895	ENSDART00000040312	23	18	18	ATCCACAAACTTCTGCAGTGTAC	5	-	2213	2829
ENSDARG00000008895	ENSDART00000040312	23	19	19	GACTCACCCTGCCCAGTTTGTGGTC	7	-	2503	2829
ENSDARG00000008895	ENSDART00000040312	23	19	19	CCCTGCCCAGTTTGTGGTCGGCGAT	7	-	2497	2829
ENSDARG00000008895	ENSDART00000040312	23	20	20	CTCTCCACCATTTGTTTGTAGCG	5	-	2563	2829
ENSDARG00000008895	ENSDART00000040312	23	23	23	AGCGGCGGCGATCTGTTGGAGTC	5	-	2792	2829
ENSDARG00000008895	ENSDART00000040312	23	23	23	AGCTGCATCTTCTGAGCAGTGGAG	6	-	2760	2829
ENSDARG00000008895	ENSDART00000040312	23	23	23	CACAGCGGCGGCGATCTGTTGGA	5	-	2795	2829
ENSDARG00000009079	ENSDART00000044301	23	1	1	GAAAAAGCCCTTGGCGTTTGCAGTC	7	-	63	1434
ENSDARG00000009079	ENSDART00000044301	23	2	2	ACACTAACCAAGGAATGAGTTTGCC	7	-	226	1434
ENSDARG00000009079	ENSDART00000044301	23	4	4	CCCCCAAGAAACATGTTTAGGGA	5	-	397	1434
ENSDARG00000009079	ENSDART00000044301	23	7	7	CAAGCCGCACATATGGAGTGTGT	5	-	783	1434
ENSDARG00000009079	ENSDART00000044301	23	7	7	ACAAGCCGCACATATGGAGTGTGT	6	-	783	1434
ENSDARG00000009079	ENSDART00000044301	23	11	11	AGACAATCCTCCTCCGAATTTGTT	6	-	1216	1434
ENSDARG00000009341	ENSDART00000025802	23	6	6	GCCCACAAATTCAGTTTGGTAAC	5	-	377	1350
ENSDARG00000009341	ENSDART00000025802	23	7	7	GCATGCAACACCTCAGGTGAGTCT	6	-	531	1350
ENSDARG00000009341	ENSDART00000025802	23	11	11	ATCTCCTGCTCGTATTTCTGTTGAT	7	-	911	1350
ENSDARG00000009341	ENSDART00000025802	23	13	13	GTTGTCTTCGGTGGTTAGAGTGT	5	-	1169	1350
ENSDARG00000009341	ENSDART00000025802	23	13	13	CTCTTCAGAGCCAGGTTGTCTTC	5	-	1183	1350
ENSDARG00000009341	ENSDART00000025802	23	13	13	CGCTCATAAGCTTGTTGATTTTGCG	7	-	1210	1350
ENSDARG00000009341	ENSDART00000102485	23	4	4	AAAAACAGAAAAGGTGTATGAGGT	6	-	308	324
ENSDARG00000009341	ENSDART00000102488	23	5	5	GCCCACAAATTCAGTTTGGTAAC	5	-	374	5583
ENSDARG00000009341	ENSDART00000102488	23	6	6	GCATGCAACACCTCAGGTGAGTCT	6	-	528	5583
ENSDARG00000009341	ENSDART00000102488	23	10	10	ATCTCCTGCTCGTATTTCTGTTGAT	7	-	908	5583
ENSDARG00000009341	ENSDART00000102488	23	12	12	CTCTTCAGAGCCAGGTTGTCTTC	5	-	1180	5583
ENSDARG00000009341	ENSDART00000102488	23	12	12	GTTGTCTTCGGTGGTTAGAGTGT	5	-	1166	5583
ENSDARG00000009341	ENSDART00000102488	23	12	12	CGCTCATAAGCTTGTTGATTTTGCG	7	-	1207	5583
ENSDARG00000009341	ENSDART00000102488	23	19	19	GACTCCTTATATTTAATCTGTAGAC	7	-	1865	5583
ENSDARG00000009341	ENSDART00000102488	23	20	20	AGATTCACCATGTCCTGAGGCAGGT	7	-	2024	5583
ENSDARG00000009341	ENSDART00000102488	23	25	25	ACATCACTCTGCAAGCCGTAGGC	5	-	2887	5583
ENSDARG00000009341	ENSDART00000102488	23	27	27	GCACTCACATCCTGTCTGTATTT	5	-	3016	5583
ENSDARG00000009341	ENSDART00000102488	23	29	29	ACACTCACATCACTGAGGATTTC	5	-	3310	5583
ENSDARG00000009341	ENSDART00000102488	23	36	36	AGAGTCCTCCAAAATGCTGCGGAC	6	-	4102	5583
ENSDARG00000009341	ENSDART00000102488	23	36	36	CTCTGCAGCTCATATGCCTTTTTG	6	-	4338	5583
ENSDARG00000009341	ENSDART00000102488	23	37	37	CTCTCCAGCTTTCTTTGCAGACTCT	7	-	4434	5583
ENSDARG00000009341	ENSDART00000102488	23	38	38	AACTTCAGACTGTCTGGATTTTGAC	7	-	4481	5583
ENSDARG00000009341	ENSDART00000102488	23	41	41	GTCGTCCTCAACACTGAGGAGGCC	6	-	4828	5583
ENSDARG00000009341	ENSDART00000102488	23	41	41	CTCTGCAGCTGGTAGGCTTGTTT	5	-	5068	5583
ENSDARG00000009341	ENSDART00000102488	23	42	42	ACCTTCAGAGAGCCTGGTGGGGTC	6	-	5139	5583
ENSDARG00000009341	ENSDART00000102488	23	42	42	ACCTTCAGAGAGCCTGGTGGGGT	5	-	5140	5583
ENSDARG00000009341	ENSDART00000102488	23	43	43	TCCGTCTGCTCTGTGGTGGAGTC	5	-	5284	5583
ENSDARG00000009341	ENSDART00000102488	23	43	43	GTCTCCGTCTGCTCTGTGGTGGAG	6	-	5286	5583
ENSDARG00000009341	ENSDART00000102488	23	43	43	GTCTCCGTCTGCTCTGTGGTGGA	5	-	5287	5583
ENSDARG00000009341	ENSDART00000102488	23	43	43	CGCATCTGCCTGCTCTGTGATGGC	6	-	5554	5583
ENSDARG00000009341	ENSDART00000102488	23	43	43	AACTCCTGCTGTCTCTGGAGCATCT	7	-	5246	5583
ENSDARG00000009365	ENSDART00000014358	23	1	1	CACTGCTGCTCTGTGTCTGAGGTC	6	-	139	2550
ENSDARG00000009365	ENSDART00000014358	23	1	1	CACTGCTGCTCTGTGTCTGAGGT	5	-	140	2550
ENSDARG00000009365	ENSDART00000014358	23	3	3	TCCCTCTGCTGGAGGCTGGAGAC	5	-	293	2550
ENSDARG00000009365	ENSDART00000014358	23	3	3	CTCATCAGCTCCCTCTGCTGGAGGC	7	-	300	2550
ENSDARG00000009365	ENSDART00000014358	23	3	3	AGCTCCCTCTGCTGGAGGCTGGA	5	-	296	2550
ENSDARG00000009365	ENSDART00000014358	23	3	3	ACCCACGGCTGAGGCTCTGGAGTC	6	-	375	2550
ENSDARG00000009365	ENSDART00000014358	23	7	7	CACTGCACATGGCTGATGGTTTT	5	-	883	2550
ENSDARG00000009365	ENSDART00000014358	23	7	7	TGCCACTGCACATGGCTGATGGT	5	-	886	2550
ENSDARG00000009365	ENSDART00000014358	23	7	7	TCCTTCAGCTGAGTCTCTGTTTTC	6	-	822	2550
ENSDARG00000009365	ENSDART00000014358	23	8	8	AGCTCCAGAACAGGATGTGTGAGGG	7	-	1000	2550
ENSDARG00000009365	ENSDART00000014358	23	9	9	GCCGCCGGCGATGATGTTGTGGTC	6	-	1099	2550
ENSDARG00000009365	ENSDART00000014358	23	9	9	TGCAGCCGCCGGCGATGATGTTGTG	7	-	1102	2550
ENSDARG00000009365	ENSDART00000014358	23	9	9	GCAGCCGCCGGCGATGATGTTGTG	6	-	1102	2550
ENSDARG00000009365	ENSDART00000014358	23	18	18	TCCACCTTCCAGTCGGTGTAAAC	5	-	1810	2550
ENSDARG00000009365	ENSDART00000014358	23	18	18	GCATTCGTCCTGAGTCGTTGTCTTT	7	-	1834	2550
ENSDARG00000009365	ENSDART00000014358	23	18	18	TTCTCCACCTTCCAGTCGGTGTA	5	-	1813	2550
ENSDARG00000009365	ENSDART00000014358	23	19	19	CTCTCCAGATGGAGAAGCTGAATCT	7	-	1957	2550
ENSDARG00000009365	ENSDART00000014358	23	20	20	GTATGCAGCTGATGGCGGCAGTG	5	-	2157	2550
ENSDARG00000009365	ENSDART00000014358	23	21	21	ACCGCCAGAAGATTCTGTTTGGCT	6	-	2196	2550
ENSDARG00000009365	ENSDART00000014358	23	21	21	GCAGGCTCCCCGGGATCTGCAGGA	6	-	2246	2550
ENSDARG00000009365	ENSDART00000014358	23	22	22	TCCGTCTCCTTCTTCTTCTTTTGGT	7	-	2363	2550
ENSDARG00000009365	ENSDART00000014358	23	22	22	CTCACCGTCTTCTTCTTCTGCTGTT	7	-	2393	2550
ENSDARG00000009365	ENSDART00000014358	23	23	23	TTCCTCTTCCTGTTTTGGAGGAGTC	7	-	2421	2550
ENSDARG00000009365	ENSDART00000014358	23	23	23	GTTCACTTCCTCTTCCTGTTTTGGA	7	-	2427	2550
ENSDARG00000009365	ENSDART00000014358	23	23	23	CACTTCCTCTTCCTGTTTTGGAGGA	7	-	2424	2550
ENSDARG00000009365	ENSDART00000014358	23	23	23	CACTTCCTCTTCCTGTTTTGGAG	5	-	2426	2550
ENSDARG00000009365	ENSDART00000039175	23	4	4	TCCTTCAGCTGAGTCTCTGTTTTC	6	-	399	2151
ENSDARG00000009365	ENSDART00000039175	23	4	4	TGCCACTGCACATGGCTGATGGT	5	-	463	2151
ENSDARG00000009365	ENSDART00000039175	23	4	4	CACTGCACATGGCTGATGGTTTT	5	-	460	2151
ENSDARG00000009365	ENSDART00000039175	23	5	5	AGCTCCAGAACAGGATGTGTGAGGG	7	-	577	2151
ENSDARG00000009365	ENSDART00000039175	23	6	6	TGCAGCCGCCGGCGATGATGTTGTG	7	-	679	2151
ENSDARG00000009365	ENSDART00000039175	23	6	6	GCCGCCGGCGATGATGTTGTGGTC	6	-	676	2151
ENSDARG00000009365	ENSDART00000039175	23	6	6	GCAGCCGCCGGCGATGATGTTGTG	6	-	679	2151
ENSDARG00000009365	ENSDART00000039175	23	14	14	TCCACCTTCCAGTCGGTGTAAAC	5	-	1411	2151
ENSDARG00000009365	ENSDART00000039175	23	14	14	GCATTCGTCCTGAGTCGTTGTCTTT	7	-	1435	2151
ENSDARG00000009365	ENSDART00000039175	23	14	14	TTCTCCACCTTCCAGTCGGTGTA	5	-	1414	2151
ENSDARG00000009365	ENSDART00000039175	23	15	15	CTCTCCAGATGGAGAAGCTGAATCT	7	-	1558	2151
ENSDARG00000009365	ENSDART00000039175	23	16	16	GTATGCAGCTGATGGCGGCAGTG	5	-	1758	2151
ENSDARG00000009365	ENSDART00000039175	23	17	17	GCAGGCTCCCCGGGATCTGCAGGA	6	-	1847	2151
ENSDARG00000009365	ENSDART00000039175	23	17	17	ACCGCCAGAAGATTCTGTTTGGCT	6	-	1797	2151
ENSDARG00000009365	ENSDART00000039175	23	18	18	CTCACCGTCTTCTTCTTCTGCTGTT	7	-	1994	2151
ENSDARG00000009365	ENSDART00000039175	23	18	18	TCCGTCTCCTTCTTCTTCTTTTGGT	7	-	1964	2151
ENSDARG00000009365	ENSDART00000039175	23	19	19	TTCCTCTTCCTGTTTTGGAGGAGTC	7	-	2022	2151
ENSDARG00000009365	ENSDART00000039175	23	19	19	CACTTCCTCTTCCTGTTTTGGAG	5	-	2027	2151
ENSDARG00000009365	ENSDART00000039175	23	19	19	GTTCACTTCCTCTTCCTGTTTTGGA	7	-	2028	2151
ENSDARG00000009365	ENSDART00000039175	23	19	19	CACTTCCTCTTCCTGTTTTGGAGGA	7	-	2025	2151
ENSDARG00000009365	ENSDART00000061556	23	1	1	CACTGCTGCTCTGTGTCTGAGGTC	6	-	139	2532
ENSDARG00000009365	ENSDART00000061556	23	1	1	CACTGCTGCTCTGTGTCTGAGGT	5	-	140	2532
ENSDARG00000009365	ENSDART00000061556	23	3	3	TCCCTCTGCTGGAGGCTGGAGAC	5	-	293	2532
ENSDARG00000009365	ENSDART00000061556	23	3	3	CTCATCAGCTCCCTCTGCTGGAGGC	7	-	300	2532
ENSDARG00000009365	ENSDART00000061556	23	3	3	AGCTCCCTCTGCTGGAGGCTGGA	5	-	296	2532
ENSDARG00000009365	ENSDART00000061556	23	3	3	ACCCACGGCTGAGGCTCTGGAGTC	6	-	375	2532
ENSDARG00000009365	ENSDART00000061556	23	7	7	CACTGCACATGGCTGATGGTTTT	5	-	883	2532
ENSDARG00000009365	ENSDART00000061556	23	7	7	TCCTTCAGCTGAGTCTCTGTTTTC	6	-	822	2532
ENSDARG00000009365	ENSDART00000061556	23	7	7	TGCCACTGCACATGGCTGATGGT	5	-	886	2532
ENSDARG00000009365	ENSDART00000061556	23	8	8	AGCTCCAGAACAGGATGTGTGAGGG	7	-	1000	2532
ENSDARG00000009365	ENSDART00000061556	23	9	9	GCCGCCGGCGATGATGTTGTGGTC	6	-	1099	2532
ENSDARG00000009365	ENSDART00000061556	23	9	9	TGCAGCCGCCGGCGATGATGTTGTG	7	-	1102	2532
ENSDARG00000009365	ENSDART00000061556	23	9	9	GCAGCCGCCGGCGATGATGTTGTG	6	-	1102	2532
ENSDARG00000009365	ENSDART00000061556	23	17	17	TCCACCTTCCAGTCGGTGTAAAC	5	-	1792	2532
ENSDARG00000009365	ENSDART00000061556	23	17	17	TTCTCCACCTTCCAGTCGGTGTA	5	-	1795	2532
ENSDARG00000009365	ENSDART00000061556	23	17	17	GCATTCGTCCTGAGTCGTTGTCTTT	7	-	1816	2532
ENSDARG00000009365	ENSDART00000061556	23	18	18	CTCTCCAGATGGAGAAGCTGAATCT	7	-	1939	2532
ENSDARG00000009365	ENSDART00000061556	23	19	19	GTATGCAGCTGATGGCGGCAGTG	5	-	2139	2532
ENSDARG00000009365	ENSDART00000061556	23	20	20	ACCGCCAGAAGATTCTGTTTGGCT	6	-	2178	2532
ENSDARG00000009365	ENSDART00000061556	23	20	20	GCAGGCTCCCCGGGATCTGCAGGA	6	-	2228	2532
ENSDARG00000009365	ENSDART00000061556	23	21	21	TCCGTCTCCTTCTTCTTCTTTTGGT	7	-	2345	2532
ENSDARG00000009365	ENSDART00000061556	23	21	21	CTCACCGTCTTCTTCTTCTGCTGTT	7	-	2375	2532
ENSDARG00000009365	ENSDART00000061556	23	22	22	TTCCTCTTCCTGTTTTGGAGGAGTC	7	-	2403	2532
ENSDARG00000009365	ENSDART00000061556	23	22	22	GTTCACTTCCTCTTCCTGTTTTGGA	7	-	2409	2532
ENSDARG00000009365	ENSDART00000061556	23	22	22	CACTTCCTCTTCCTGTTTTGGAGGA	7	-	2406	2532
ENSDARG00000009365	ENSDART00000061556	23	22	22	CACTTCCTCTTCCTGTTTTGGAG	5	-	2408	2532
ENSDARG00000009524	ENSDART00000024313	23	1	1	TTCTGCTTCGTTCATCTGCTGTG	5	+	70	1257
ENSDARG00000009524	ENSDART00000024313	23	2	2	GTCAGCCGCACATCGGTGGTGTT	5	+	586	1257
ENSDARG00000009524	ENSDART00000024313	23	2	2	GTCAGCCGCACATCGGTGGTGTTC	6	+	586	1257
ENSDARG00000009524	ENSDART00000024313	23	2	2	GTTTCAGGCATCAGTGACGTGGTG	6	+	454	1257
ENSDARG00000009524	ENSDART00000024313	23	4	4	GGCTACAAACCTAATGATGTTGTC	6	+	826	1257
ENSDARG00000009549	ENSDART00000020695	23	1	1	CACCACAGCCCAGCATGAAGGAGAA	7	+	108	6789
ENSDARG00000009549	ENSDART00000020695	23	2	2	CCCAGCTGCACACTGTAGGGGGA	5	+	233	6789
ENSDARG00000009549	ENSDART00000020695	23	2	2	AGCTGCACACTGTAGGGGGAGTT	5	+	236	6789
ENSDARG00000009549	ENSDART00000020695	23	2	2	AGCTGCACACTGTAGGGGGAGTTC	6	+	236	6789
ENSDARG00000009549	ENSDART00000020695	23	4	4	AGACCCAGCAGGGTGAGGAGGAGCC	7	+	602	6789
ENSDARG00000009549	ENSDART00000020695	23	4	4	AGACCCAGCAGGGTGAGGAGGAG	5	+	602	6789
ENSDARG00000009549	ENSDART00000020695	23	4	4	GAAGACCCAGCAGGGTGAGGAGGAG	7	+	600	6789
ENSDARG00000009549	ENSDART00000020695	23	4	4	GACCCAGCAGGGTGAGGAGGAGCC	6	+	603	6789
ENSDARG00000009549	ENSDART00000020695	23	5	5	CTCAGCTCCTCACCGAGATGGTTCT	7	+	743	6789
ENSDARG00000009549	ENSDART00000020695	23	6	6	TCCAGCAGACGCCGTTTGTGAGGCG	7	+	872	6789
ENSDARG00000009549	ENSDART00000020695	23	6	6	AGCTCCTGCTGTTCATCTGCGGCT	6	+	908	6789
ENSDARG00000009549	ENSDART00000020695	23	7	7	AGCATCTTAAAGCATGTGCTGAA	5	+	1094	6789
ENSDARG00000009549	ENSDART00000020695	23	8	8	AGCCTCTTCTGGATCTTCTGGTGGA	7	+	1275	6789
ENSDARG00000009549	ENSDART00000020695	23	9	9	CGCTCATCCAGTTTCTGCGTTGCT	6	+	1460	6789
ENSDARG00000009549	ENSDART00000020695	23	9	9	CAATTCCTCATCTGTGCGCTGGC	5	+	1497	6789
ENSDARG00000009549	ENSDART00000020695	23	10	10	CAAATCCCAGCAGGAGTTGCTGCT	6	+	1560	6789
ENSDARG00000009549	ENSDART00000020695	23	10	10	AACAAATCCCAGCAGGAGTTGCT	5	+	1558	6789
ENSDARG00000009549	ENSDART00000020695	23	10	10	AAACAAATCCCAGCAGGAGTTGCT	6	+	1557	6789
ENSDARG00000009549	ENSDART00000020695	23	13	13	CACTCAGCAAGTGGTGAAGTTGAT	6	+	1914	6789
ENSDARG00000009549	ENSDART00000020695	23	14	14	GCCTCCAACCTGATGATTGAGTT	5	+	2149	6789
ENSDARG00000009549	ENSDART00000020695	23	14	14	CAAAGCAAAGAAAGTGCAGTTGAC	6	+	2079	6789
ENSDARG00000009549	ENSDART00000020695	23	15	15	GTATGCAAAACCCTGCTGTGCCGTG	7	+	2385	6789
ENSDARG00000009549	ENSDART00000020695	23	16	16	GTCACCGGCCACAGCTGGAGAGTCT	7	+	2504	6789
ENSDARG00000009549	ENSDART00000020695	23	18	18	GACTCATCCGAGAGCTGTTTGAGTA	7	+	2951	6789
ENSDARG00000009549	ENSDART00000020695	23	18	18	TGCTACGGCTGTGCGTCTGCTGTC	6	+	2854	6789
ENSDARG00000009549	ENSDART00000020695	23	18	18	ACCTTCATCAGCGAGAAGCAGCA	5	+	2735	6789
ENSDARG00000009549	ENSDART00000020695	23	20	20	TTAGACTTCGCTGTGGTGAGTCT	5	+	3203	6789
ENSDARG00000009549	ENSDART00000020695	23	21	21	AAAGACCCCTGTGGTGGTGGAGAAC	7	+	3249	6789
ENSDARG00000009549	ENSDART00000020695	23	21	21	AAAGACCCCTGTGGTGGTGGAGAA	6	+	3249	6789
ENSDARG00000009549	ENSDART00000020695	23	24	24	TCCCTAGCCGCAAGCAGCAGGTTCT	7	+	3704	6789
ENSDARG00000009549	ENSDART00000020695	23	25	25	AGCATCGCAGGAGAGTGTGCTGCT	6	+	3760	6789
ENSDARG00000009549	ENSDART00000020695	23	28	28	ACCAAAGCATTCATGGCTGTGTGC	6	+	4156	6789
ENSDARG00000009549	ENSDART00000020695	23	28	28	AACCAAAGCATTCATGGCTGTGTGC	7	+	4155	6789
ENSDARG00000009549	ENSDART00000020695	23	29	29	AAAGACCCACAGCAGGAAGACTTC	6	+	4303	6789
ENSDARG00000009549	ENSDART00000020695	23	29	29	GAAGACTTCCTGCAGGGCCGGATGC	7	+	4318	6789
ENSDARG00000009549	ENSDART00000020695	23	33	33	AAAATCAACAGGCAGCAGCTGGT	5	+	4795	6789
ENSDARG00000009549	ENSDART00000020695	23	33	33	GTAAAAATCAACAGGCAGCAGCT	5	+	4792	6789
ENSDARG00000009549	ENSDART00000020695	23	34	34	GTTTCAGGCATTGGTGGCTGAGCA	6	+	4860	6789
ENSDARG00000009549	ENSDART00000020695	23	35	35	AGAAAATGCATATCCTGGTGGAGCG	7	+	5126	6789
ENSDARG00000009549	ENSDART00000020695	23	35	35	GTAACCTGCTGCTGACGGGTGATAA	7	+	4988	6789
ENSDARG00000009549	ENSDART00000020695	23	40	40	CTCTGCTTAAACAGATGGAGGAGCT	7	+	5714	6789
ENSDARG00000009549	ENSDART00000020695	23	41	41	GCCAACAAAAGTTCTGGGCATCT	5	+	5793	6789
ENSDARG00000009549	ENSDART00000020695	23	41	41	AACAAACCCCGCAAGCAGCAGGG	5	+	5854	6789
ENSDARG00000009549	ENSDART00000020695	23	41	41	GAACAAACCCCGCAAGCAGCAGGG	6	+	5853	6789
ENSDARG00000009549	ENSDART00000020695	23	44	44	GGCCACATCGAGAGAGGAGAAGAA	6	+	6264	6789
ENSDARG00000009549	ENSDART00000020695	23	45	45	GACAAAGCAGTGAAGGAGTATGC	5	+	6490	6789
ENSDARG00000009549	ENSDART00000020695	23	45	45	CGCTCACCACTTCTCTTCTGGGGTC	7	+	6520	6789
ENSDARG00000009549	ENSDART00000020695	23	45	45	ACAGACAAAGCAGTGAAGGAGTA	5	+	6487	6789
ENSDARG00000009549	ENSDART00000020695	23	45	45	AGACAAAGCAGTGAAGGAGTATGC	6	+	6489	6789
ENSDARG00000009549	ENSDART00000020695	23	46	46	GGCTTCAGAAAGGGTGTTGAGGGC	6	+	6657	6789
ENSDARG00000009549	ENSDART00000020695	23	46	46	GGCTTCAGAAAGGGTGTTGAGGG	5	+	6657	6789
ENSDARG00000009549	ENSDART00000020695	23	47	47	GACATCCCAGACCCGGACGCCTTC	6	+	6748	6789
ENSDARG00000009549	ENSDART00000033970	23	3	3	GTCCCCAGAAATCAGTTGCTGTC	5	+	226	15474
ENSDARG00000009549	ENSDART00000033970	23	4	4	ATCATCACCTTTACTGCGATGAT	5	+	394	15474
ENSDARG00000009549	ENSDART00000033970	23	7	7	ATCAACCGCTTCCAGGACGCGGTA	6	+	760	15474
ENSDARG00000009549	ENSDART00000033970	23	8	8	AGCTGCCTCTATGCAGGTGGGTTC	6	+	955	15474
ENSDARG00000009549	ENSDART00000033970	23	8	8	CTAAGCTGCCTCTATGCAGGTGGG	6	+	952	15474
ENSDARG00000009549	ENSDART00000033970	23	9	9	TCCACCGGCTCCAAGGAGGAAGAC	6	+	1036	15474
ENSDARG00000009549	ENSDART00000033970	23	11	11	AGCCCCACAGCCCTGGCTGATAA	5	+	1225	15474
ENSDARG00000009549	ENSDART00000033970	23	12	12	CTATCAGGCACCAAGGTTTTGGGGT	7	+	1340	15474
ENSDARG00000009549	ENSDART00000033970	23	12	12	CTATCAGGCACCAAGGTTTTGGGG	6	+	1340	15474
ENSDARG00000009549	ENSDART00000033970	23	12	12	CTATCAGGCACCAAGGTTTTGGG	5	+	1340	15474
ENSDARG00000009549	ENSDART00000033970	23	14	14	CTCCAACACTTACTATGAAGACGAC	7	+	1647	15474
ENSDARG00000009549	ENSDART00000033970	23	14	14	CAACACTTACTATGAAGACGACTTC	7	+	1650	15474
ENSDARG00000009549	ENSDART00000033970	23	14	14	GACTTCAGCAGCACAGAAGAGGAC	6	+	1669	15474
ENSDARG00000009549	ENSDART00000033970	23	15	15	GACTCAAGAGCCCAAGTAAGCTGAA	7	+	1817	15474
ENSDARG00000009549	ENSDART00000033970	23	15	15	CAAGTCGCAAGGACCCGGAGTTGGT	7	+	1868	15474
ENSDARG00000009549	ENSDART00000033970	23	15	15	AGCCCATTCTGGGGCTGTGGTTTG	6	+	1715	15474
ENSDARG00000009549	ENSDART00000033970	23	18	18	TTCTGCAGCAGTTAGGTGTTGCC	5	+	2141	15474
ENSDARG00000009549	ENSDART00000033970	23	18	18	CTCTTCTGCAGCAGTTAGGTGTT	5	+	2138	15474
ENSDARG00000009549	ENSDART00000033970	23	19	19	GCCCGCATCTTACTTGTGTTTGAC	6	+	2512	15474
ENSDARG00000009549	ENSDART00000033970	23	19	19	CGCATCTTACTTGTGTTTGACTAC	6	+	2515	15474
ENSDARG00000009549	ENSDART00000033970	23	23	23	TACTACTTCCTGGTGCTTTGGAA	5	+	2944	15474
ENSDARG00000009549	ENSDART00000033970	23	24	24	TGCTACATCTTTGATCGAAGTGGCA	7	+	3144	15474
ENSDARG00000009549	ENSDART00000033970	23	25	25	CGCTGCAGCTCATCGACGTCTAC	5	+	3425	15474
ENSDARG00000009549	ENSDART00000033970	23	25	25	ACCTGCTGCCCGCCACGCTGCAGCT	7	+	3410	15474
ENSDARG00000009549	ENSDART00000033970	23	25	25	ACCATCTACACATTGGATGCTGTG	6	+	3298	15474
ENSDARG00000009549	ENSDART00000033970	23	26	26	CGCTGCAAAGCCAACTTGCTTGGTA	7	+	3559	15474
ENSDARG00000009549	ENSDART00000033970	23	26	26	TGCAAAGCCAACTTGCTTGGTAA	5	+	3562	15474
ENSDARG00000009549	ENSDART00000033970	23	28	28	ATCCACAGCGAAACGCCTTTGCC	5	+	3671	15474
ENSDARG00000009549	ENSDART00000033970	23	29	29	GCACACTGCTTCCTCTTTTGTTGGA	7	+	3869	15474
ENSDARG00000009549	ENSDART00000033970	23	29	29	CACTGCTTCCTCTTTTGTTGGAGAG	7	+	3872	15474
ENSDARG00000009549	ENSDART00000033970	23	29	29	AGCAGCACAGAGAGTGTGGCTGAG	6	+	3895	15474
ENSDARG00000009549	ENSDART00000033970	23	30	30	GTCCGCAAAGCAATGGAGGAGTT	5	+	4111	15474
ENSDARG00000009549	ENSDART00000033970	23	30	30	GTCCGCAAAGCAATGGAGGAGTTC	6	+	4111	15474
ENSDARG00000009549	ENSDART00000033970	23	32	32	ACCTCCTACATCGTGCGGGATAA	5	+	4420	15474
ENSDARG00000009549	ENSDART00000033970	23	34	34	ATCATCTCCTACCTGGCGGATGTG	6	+	4729	15474
ENSDARG00000009549	ENSDART00000033970	23	34	34	CCCAGCTCCTGATGGATGGAGAG	5	+	4790	15474
ENSDARG00000009549	ENSDART00000033970	23	34	34	ATCATCTCCTACCTGGCGGATGT	5	+	4729	15474
ENSDARG00000009549	ENSDART00000033970	23	35	35	TTCACCATCACACAGAAGGAGTT	5	+	4924	15474
ENSDARG00000009549	ENSDART00000033970	23	37	37	GAAGTCCCAGCAGTGGAATGAGCT	6	+	5123	15474
ENSDARG00000009549	ENSDART00000033970	23	37	37	GACGGCAAAAACAGCGACGATGAC	6	+	5254	15474
ENSDARG00000009549	ENSDART00000033970	23	37	37	AGCCCAAGAAGAGTAGTGTGTGTAA	7	+	5279	15474
ENSDARG00000009549	ENSDART00000033970	23	37	37	ACAAGCCCAAGAAGAGTAGTGTGT	6	+	5276	15474
ENSDARG00000009549	ENSDART00000033970	23	38	38	GGCATCAGCGGTGGGCAGCAGCA	5	+	5421	15474
ENSDARG00000009549	ENSDART00000033970	23	38	38	GCAGGCATCAGCGGTGGGCAGCA	5	+	5418	15474
ENSDARG00000009549	ENSDART00000033970	23	39	39	CTCATCAGCGCTCATGTGTTGCG	5	+	5599	15474
ENSDARG00000009549	ENSDART00000033970	23	39	39	GTCCTCTCCTCACGGACGTAGAC	5	+	5643	15474
ENSDARG00000009549	ENSDART00000033970	23	41	41	TTAGCCATCATAACTGCAGATTTC	6	+	5980	15474
ENSDARG00000009549	ENSDART00000033970	23	41	41	TTCAGCAGCACAGGCTCTGTGTCT	6	+	5875	15474
ENSDARG00000009549	ENSDART00000033970	23	43	43	TGCTGCCACAGTGAGCCGCAGTA	5	+	6333	15474
ENSDARG00000009549	ENSDART00000033970	23	43	43	TTACTCCCACGTCCTGCAGATGCT	6	+	6279	15474
ENSDARG00000009549	ENSDART00000033970	23	43	43	TACTCCCACGTCCTGCAGATGCT	5	+	6280	15474
ENSDARG00000009549	ENSDART00000033970	23	46	46	ACCAGCAGCTGACAGAGGTGGAGTT	7	+	6821	15474
ENSDARG00000009549	ENSDART00000033970	23	46	46	ACCAGCAGCTGACAGAGGTGGAG	5	+	6821	15474
ENSDARG00000009549	ENSDART00000033970	23	48	48	ACCAGCGGCACTGTTTTGGAGAG	5	+	7345	15474
ENSDARG00000009549	ENSDART00000033970	23	48	48	ACAACCAGCGGCACTGTTTTGGAG	6	+	7342	15474
ENSDARG00000009549	ENSDART00000033970	23	48	48	ACAACCAGCGGCACTGTTTTGGA	5	+	7342	15474
ENSDARG00000009549	ENSDART00000033970	23	48	48	GCCTCAGTCGACCCAGCAGGTGTC	6	+	7156	15474
ENSDARG00000009549	ENSDART00000033970	23	50	50	TCCATCCCCACTCCTGCTGGAGTA	6	+	7477	15474
ENSDARG00000009549	ENSDART00000033970	23	51	51	GCCCGCTCCATCGCCATTATGAGAC	7	+	7666	15474
ENSDARG00000009549	ENSDART00000033970	23	55	55	GACGACGACGATGATGATGCCGAT	6	+	8119	15474
ENSDARG00000009549	ENSDART00000033970	23	56	56	ACATCCCTCCTGATGCTGATGAC	5	+	8342	15474
ENSDARG00000009549	ENSDART00000033970	23	57	57	AGCAGCAGCAGTGCTTTGGGTCTTC	7	+	8419	15474
ENSDARG00000009549	ENSDART00000033970	23	57	57	AGCAGCAGCAGTGCTTTGGGTCT	5	+	8419	15474
ENSDARG00000009549	ENSDART00000033970	23	57	57	GCACCCAGCTCCTCGTCGCTGGA	5	+	8467	15474
ENSDARG00000009549	ENSDART00000033970	23	57	57	CCCAGCTCCTCGTCGCTGGATGC	5	+	8470	15474
ENSDARG00000009549	ENSDART00000033970	23	58	58	GCCCCAGCCTCGGATGATGAGGGG	6	+	8566	15474
ENSDARG00000009549	ENSDART00000033970	23	58	58	TTCAGCCCCAGCCTCGGATGATGAG	7	+	8562	15474
ENSDARG00000009549	ENSDART00000033970	23	58	58	CACCTCTCCTGCCGAGCATGGGGG	6	+	8622	15474
ENSDARG00000009549	ENSDART00000033970	23	58	58	AGCCCCAGCCTCGGATGATGAGGGG	7	+	8565	15474
ENSDARG00000009549	ENSDART00000033970	23	59	59	CACCACAGCCCAGCATGAAGGAGAA	7	+	8799	15474
ENSDARG00000009549	ENSDART00000033970	23	60	60	AGCTGCACACTGTAGGGGGAGTT	5	+	8927	15474
ENSDARG00000009549	ENSDART00000033970	23	60	60	AGCTGCACACTGTAGGGGGAGTTC	6	+	8927	15474
ENSDARG00000009549	ENSDART00000033970	23	60	60	CCCAGCTGCACACTGTAGGGGGA	5	+	8924	15474
ENSDARG00000009549	ENSDART00000033970	23	62	62	GACCCAGCAGGGTGAGGAGGAGCC	6	+	9294	15474
ENSDARG00000009549	ENSDART00000033970	23	62	62	GAAGACCCAGCAGGGTGAGGAGGAG	7	+	9291	15474
ENSDARG00000009549	ENSDART00000033970	23	62	62	AGACCCAGCAGGGTGAGGAGGAG	5	+	9293	15474
ENSDARG00000009549	ENSDART00000033970	23	62	62	AGACCCAGCAGGGTGAGGAGGAGCC	7	+	9293	15474
ENSDARG00000009549	ENSDART00000033970	23	63	63	CTCAGCTCCTCACCGAGATGGTTCT	7	+	9434	15474
ENSDARG00000009549	ENSDART00000033970	23	64	64	TCCAGCAGACGCCGTTTGTGAGGCG	7	+	9563	15474
ENSDARG00000009549	ENSDART00000033970	23	64	64	AGCTCCTGCTGTTCATCTGCGGCT	6	+	9599	15474
ENSDARG00000009549	ENSDART00000033970	23	65	65	AGCATCTTAAAGCATGTGCTGAA	5	+	9785	15474
ENSDARG00000009549	ENSDART00000033970	23	66	66	AGCCTCTTCTGGATCTTCTGGTGGA	7	+	9966	15474
ENSDARG00000009549	ENSDART00000033970	23	67	67	CGCTCATCCAGTTTCTGCGTTGCT	6	+	10151	15474
ENSDARG00000009549	ENSDART00000033970	23	67	67	CAATTCCTCATCTGTGCGCTGGC	5	+	10188	15474
ENSDARG00000009549	ENSDART00000033970	23	68	68	CAAATCCCAGCAGGAGTTGCTGCT	6	+	10251	15474
ENSDARG00000009549	ENSDART00000033970	23	68	68	AAACAAATCCCAGCAGGAGTTGCT	6	+	10248	15474
ENSDARG00000009549	ENSDART00000033970	23	68	68	AACAAATCCCAGCAGGAGTTGCT	5	+	10249	15474
ENSDARG00000009549	ENSDART00000033970	23	71	71	CACTCAGCAAGTGGTGAAGTTGAT	6	+	10605	15474
ENSDARG00000009549	ENSDART00000033970	23	72	72	GCCTCCAACCTGATGATTGAGTT	5	+	10840	15474
ENSDARG00000009549	ENSDART00000033970	23	72	72	CAAAGCAAAGAAAGTGCAGTTGAC	6	+	10770	15474
ENSDARG00000009549	ENSDART00000033970	23	73	73	GTATGCAAAACCCTGCTGTGCCGTG	7	+	11076	15474
ENSDARG00000009549	ENSDART00000033970	23	74	74	GTCACCGGCCACAGCTGGAGAGTCT	7	+	11195	15474
ENSDARG00000009549	ENSDART00000033970	23	76	76	TGCTACGGCTGTGCGTCTGCTGTC	6	+	11545	15474
ENSDARG00000009549	ENSDART00000033970	23	76	76	GACTCATCCGAGAGCTGTTTGAGTA	7	+	11642	15474
ENSDARG00000009549	ENSDART00000033970	23	76	76	ACCTTCATCAGCGAGAAGCAGCA	5	+	11426	15474
ENSDARG00000009549	ENSDART00000033970	23	78	78	TTAGACTTCGCTGTGGTGAGTCT	5	+	11894	15474
ENSDARG00000009549	ENSDART00000033970	23	79	79	AAAGACCCCTGTGGTGGTGGAGAAC	7	+	11940	15474
ENSDARG00000009549	ENSDART00000033970	23	79	79	AAAGACCCCTGTGGTGGTGGAGAA	6	+	11940	15474
ENSDARG00000009549	ENSDART00000033970	23	82	82	TCCCTAGCCGCAAGCAGCAGGTTCT	7	+	12395	15474
ENSDARG00000009549	ENSDART00000033970	23	83	83	AGCATCGCAGGAGAGTGTGCTGCT	6	+	12451	15474
ENSDARG00000009549	ENSDART00000033970	23	86	86	AACCAAAGCATTCATGGCTGTGTGC	7	+	12846	15474
ENSDARG00000009549	ENSDART00000033970	23	86	86	ACCAAAGCATTCATGGCTGTGTGC	6	+	12847	15474
ENSDARG00000009549	ENSDART00000033970	23	87	87	AAAGACCCACAGCAGGAAGACTTC	6	+	12994	15474
ENSDARG00000009549	ENSDART00000033970	23	87	87	GAAGACTTCCTGCAGGGCCGGATGC	7	+	13009	15474
ENSDARG00000009549	ENSDART00000033970	23	91	91	GTAAAAATCAACAGGCAGCAGCT	5	+	13486	15474
ENSDARG00000009549	ENSDART00000033970	23	91	91	AAAATCAACAGGCAGCAGCTGGT	5	+	13489	15474
ENSDARG00000009549	ENSDART00000033970	23	92	92	GTTTCAGGCATTGGTGGCTGAGCA	6	+	13554	15474
ENSDARG00000009549	ENSDART00000033970	23	93	93	GTAACCTGCTGCTGACGGGTGATAA	7	+	13682	15474
ENSDARG00000009549	ENSDART00000033970	23	93	93	AGAAAATGCATATCCTGGTGGAGCG	7	+	13820	15474
ENSDARG00000009549	ENSDART00000033970	23	97	97	CTCTGCTTAAACAGATGGAGGAGCT	7	+	14399	15474
ENSDARG00000009549	ENSDART00000033970	23	98	98	GAACAAACCCCGCAAGCAGCAGGG	6	+	14538	15474
ENSDARG00000009549	ENSDART00000033970	23	98	98	GCCAACAAAAGTTCTGGGCATCT	5	+	14478	15474
ENSDARG00000009549	ENSDART00000033970	23	98	98	AACAAACCCCGCAAGCAGCAGGG	5	+	14539	15474
ENSDARG00000009549	ENSDART00000033970	23	101	101	GGCCACATCGAGAGAGGAGAAGAA	6	+	14949	15474
ENSDARG00000009549	ENSDART00000033970	23	102	102	CGCTCACCACTTCTCTTCTGGGGTC	7	+	15205	15474
ENSDARG00000009549	ENSDART00000033970	23	102	102	GACAAAGCAGTGAAGGAGTATGC	5	+	15175	15474
ENSDARG00000009549	ENSDART00000033970	23	102	102	AGACAAAGCAGTGAAGGAGTATGC	6	+	15174	15474
ENSDARG00000009549	ENSDART00000033970	23	102	102	ACAGACAAAGCAGTGAAGGAGTA	5	+	15172	15474
ENSDARG00000009549	ENSDART00000033970	23	103	103	GGCTTCAGAAAGGGTGTTGAGGG	5	+	15342	15474
ENSDARG00000009549	ENSDART00000033970	23	103	103	GGCTTCAGAAAGGGTGTTGAGGGC	6	+	15342	15474
ENSDARG00000009549	ENSDART00000033970	23	104	104	GACATCCCAGACCCGGACGCCTTC	6	+	15433	15474
ENSDARG00000009549	ENSDART00000055164	23	3	3	GTCCCCAGAAATCAGTTGCTGTC	5	+	226	15435
ENSDARG00000009549	ENSDART00000055164	23	4	4	ATCATCACCTTTACTGCGATGAT	5	+	394	15435
ENSDARG00000009549	ENSDART00000055164	23	7	7	ATCAACCGCTTCCAGGACGCGGTA	6	+	763	15435
ENSDARG00000009549	ENSDART00000055164	23	8	8	AGCTGCCTCTATGCAGGTGGGTTC	6	+	958	15435
ENSDARG00000009549	ENSDART00000055164	23	8	8	CTAAGCTGCCTCTATGCAGGTGGG	6	+	955	15435
ENSDARG00000009549	ENSDART00000055164	23	9	9	TCCACCGGCTCCAAGGAGGAAGAC	6	+	1039	15435
ENSDARG00000009549	ENSDART00000055164	23	11	11	AGCCCCACAGCCCTGGCTGATAA	5	+	1228	15435
ENSDARG00000009549	ENSDART00000055164	23	12	12	CTATCAGGCACCAAGGTTTTGGGGT	7	+	1343	15435
ENSDARG00000009549	ENSDART00000055164	23	12	12	CTATCAGGCACCAAGGTTTTGGG	5	+	1343	15435
ENSDARG00000009549	ENSDART00000055164	23	12	12	CTATCAGGCACCAAGGTTTTGGGG	6	+	1343	15435
ENSDARG00000009549	ENSDART00000055164	23	14	14	CTCCAACACTTACTATGAAGACGAC	7	+	1650	15435
ENSDARG00000009549	ENSDART00000055164	23	14	14	GACTTCAGCAGCACAGAAGAGGAC	6	+	1672	15435
ENSDARG00000009549	ENSDART00000055164	23	14	14	CAACACTTACTATGAAGACGACTTC	7	+	1653	15435
ENSDARG00000009549	ENSDART00000055164	23	15	15	AGCCCATTCTGGGGCTGTGGTTTG	6	+	1718	15435
ENSDARG00000009549	ENSDART00000055164	23	15	15	CAAGTCGCAAGGACCCGGAGTTGGT	7	+	1871	15435
ENSDARG00000009549	ENSDART00000055164	23	15	15	GACTCAAGAGCCCAAGTAAGCTGAA	7	+	1820	15435
ENSDARG00000009549	ENSDART00000055164	23	18	18	CTCTTCTGCAGCAGTTAGGTGTT	5	+	2141	15435
ENSDARG00000009549	ENSDART00000055164	23	18	18	TTCTGCAGCAGTTAGGTGTTGCC	5	+	2144	15435
ENSDARG00000009549	ENSDART00000055164	23	20	20	GCCCGCATCTTACTTGTGTTTGAC	6	+	2512	15435
ENSDARG00000009549	ENSDART00000055164	23	20	20	CGCATCTTACTTGTGTTTGACTAC	6	+	2515	15435
ENSDARG00000009549	ENSDART00000055164	23	24	24	TACTACTTCCTGGTGCTTTGGAA	5	+	2944	15435
ENSDARG00000009549	ENSDART00000055164	23	25	25	TGCTACATCTTTGATCGAAGTGGCA	7	+	3144	15435
ENSDARG00000009549	ENSDART00000055164	23	26	26	ACCTGCTGCCCGCCACGCTGCAGCT	7	+	3410	15435
ENSDARG00000009549	ENSDART00000055164	23	26	26	ACCATCTACACATTGGATGCTGTG	6	+	3298	15435
ENSDARG00000009549	ENSDART00000055164	23	26	26	CGCTGCAGCTCATCGACGTCTAC	5	+	3425	15435
ENSDARG00000009549	ENSDART00000055164	23	27	27	TGCAAAGCCAACTTGCTTGGTAA	5	+	3562	15435
ENSDARG00000009549	ENSDART00000055164	23	27	27	CGCTGCAAAGCCAACTTGCTTGGTA	7	+	3559	15435
ENSDARG00000009549	ENSDART00000055164	23	29	29	ATCCACAGCGAAACGCCTTTGCC	5	+	3671	15435
ENSDARG00000009549	ENSDART00000055164	23	30	30	GCACACTGCTTCCTCTTTTGTTGGA	7	+	3872	15435
ENSDARG00000009549	ENSDART00000055164	23	30	30	CACTGCTTCCTCTTTTGTTGGAGAG	7	+	3875	15435
ENSDARG00000009549	ENSDART00000055164	23	30	30	AGCAGCACAGAGAGTGTGGCTGAG	6	+	3898	15435
ENSDARG00000009549	ENSDART00000055164	23	31	31	GTCCGCAAAGCAATGGAGGAGTTC	6	+	4114	15435
ENSDARG00000009549	ENSDART00000055164	23	31	31	GTCCGCAAAGCAATGGAGGAGTT	5	+	4114	15435
ENSDARG00000009549	ENSDART00000055164	23	33	33	ACCTCCTACATCGTGCGGGATAA	5	+	4423	15435
ENSDARG00000009549	ENSDART00000055164	23	35	35	CCCAGCTCCTGATGGATGGAGAG	5	+	4793	15435
ENSDARG00000009549	ENSDART00000055164	23	35	35	ATCATCTCCTACCTGGCGGATGT	5	+	4732	15435
ENSDARG00000009549	ENSDART00000055164	23	35	35	ATCATCTCCTACCTGGCGGATGTG	6	+	4732	15435
ENSDARG00000009549	ENSDART00000055164	23	36	36	TTCACCATCACACAGAAGGAGTT	5	+	4927	15435
ENSDARG00000009549	ENSDART00000055164	23	38	38	GACGGCAAAAACAGCGACGATGAC	6	+	5257	15435
ENSDARG00000009549	ENSDART00000055164	23	38	38	AGCCCAAGAAGAGTAGTGTGTGTAA	7	+	5282	15435
ENSDARG00000009549	ENSDART00000055164	23	38	38	GAAGTCCCAGCAGTGGAATGAGCT	6	+	5126	15435
ENSDARG00000009549	ENSDART00000055164	23	38	38	ACAAGCCCAAGAAGAGTAGTGTGT	6	+	5279	15435
ENSDARG00000009549	ENSDART00000055164	23	39	39	GCAGGCATCAGCGGTGGGCAGCA	5	+	5418	15435
ENSDARG00000009549	ENSDART00000055164	23	39	39	GGCATCAGCGGTGGGCAGCAGCA	5	+	5421	15435
ENSDARG00000009549	ENSDART00000055164	23	40	40	CTCATCAGCGCTCATGTGTTGCG	5	+	5599	15435
ENSDARG00000009549	ENSDART00000055164	23	40	40	GTCCTCTCCTCACGGACGTAGAC	5	+	5643	15435
ENSDARG00000009549	ENSDART00000055164	23	42	42	TTCAGCAGCACAGGCTCTGTGTCT	6	+	5875	15435
ENSDARG00000009549	ENSDART00000055164	23	42	42	TTAGCCATCATAACTGCAGATTTC	6	+	5980	15435
ENSDARG00000009549	ENSDART00000055164	23	44	44	TACTCCCACGTCCTGCAGATGCT	5	+	6280	15435
ENSDARG00000009549	ENSDART00000055164	23	44	44	TGCTGCCACAGTGAGCCGCAGTA	5	+	6333	15435
ENSDARG00000009549	ENSDART00000055164	23	44	44	TTACTCCCACGTCCTGCAGATGCT	6	+	6279	15435
ENSDARG00000009549	ENSDART00000055164	23	47	47	ACCAGCAGCTGACAGAGGTGGAG	5	+	6821	15435
ENSDARG00000009549	ENSDART00000055164	23	47	47	ACCAGCAGCTGACAGAGGTGGAGTT	7	+	6821	15435
ENSDARG00000009549	ENSDART00000055164	23	49	49	ACAACCAGCGGCACTGTTTTGGA	5	+	7342	15435
ENSDARG00000009549	ENSDART00000055164	23	49	49	GCCTCAGTCGACCCAGCAGGTGTC	6	+	7156	15435
ENSDARG00000009549	ENSDART00000055164	23	49	49	ACCAGCGGCACTGTTTTGGAGAG	5	+	7345	15435
ENSDARG00000009549	ENSDART00000055164	23	49	49	ACAACCAGCGGCACTGTTTTGGAG	6	+	7342	15435
ENSDARG00000009549	ENSDART00000055164	23	51	51	TCCATCCCCACTCCTGCTGGAGTA	6	+	7477	15435
ENSDARG00000009549	ENSDART00000055164	23	52	52	GCCCGCTCCATCGCCATTATGAGAC	7	+	7666	15435
ENSDARG00000009549	ENSDART00000055164	23	56	56	GACGACGACGATGATGATGCCGAT	6	+	8128	15435
ENSDARG00000009549	ENSDART00000055164	23	57	57	ACATCCCTCCTGATGCTGATGAC	5	+	8351	15435
ENSDARG00000009549	ENSDART00000055164	23	58	58	AGCAGCAGCAGTGCTTTGGGTCT	5	+	8428	15435
ENSDARG00000009549	ENSDART00000055164	23	58	58	GCACCCAGCTCCTCGTCGCTGGA	5	+	8476	15435
ENSDARG00000009549	ENSDART00000055164	23	58	58	CCCAGCTCCTCGTCGCTGGATGC	5	+	8479	15435
ENSDARG00000009549	ENSDART00000055164	23	58	58	AGCAGCAGCAGTGCTTTGGGTCTTC	7	+	8428	15435
ENSDARG00000009549	ENSDART00000055164	23	59	59	TTCAGCCCCAGCCTCGGATGATGAG	7	+	8526	15435
ENSDARG00000009549	ENSDART00000055164	23	59	59	GCCCCAGCCTCGGATGATGAGGGG	6	+	8530	15435
ENSDARG00000009549	ENSDART00000055164	23	59	59	AGCCCCAGCCTCGGATGATGAGGGG	7	+	8529	15435
ENSDARG00000009549	ENSDART00000055164	23	59	59	CACCTCTCCTGCCGAGCATGGGGG	6	+	8586	15435
ENSDARG00000009549	ENSDART00000055164	23	60	60	CACCACAGCCCAGCATGAAGGAGAA	7	+	8763	15435
ENSDARG00000009549	ENSDART00000055164	23	61	61	CCCAGCTGCACACTGTAGGGGGA	5	+	8888	15435
ENSDARG00000009549	ENSDART00000055164	23	61	61	AGCTGCACACTGTAGGGGGAGTTC	6	+	8891	15435
ENSDARG00000009549	ENSDART00000055164	23	61	61	AGCTGCACACTGTAGGGGGAGTT	5	+	8891	15435
ENSDARG00000009549	ENSDART00000055164	23	63	63	AGACCCAGCAGGGTGAGGAGGAGCC	7	+	9257	15435
ENSDARG00000009549	ENSDART00000055164	23	63	63	GAAGACCCAGCAGGGTGAGGAGGAG	7	+	9255	15435
ENSDARG00000009549	ENSDART00000055164	23	63	63	GACCCAGCAGGGTGAGGAGGAGCC	6	+	9258	15435
ENSDARG00000009549	ENSDART00000055164	23	63	63	AGACCCAGCAGGGTGAGGAGGAG	5	+	9257	15435
ENSDARG00000009549	ENSDART00000055164	23	64	64	CTCAGCTCCTCACCGAGATGGTTCT	7	+	9398	15435
ENSDARG00000009549	ENSDART00000055164	23	65	65	TCCAGCAGACGCCGTTTGTGAGGCG	7	+	9527	15435
ENSDARG00000009549	ENSDART00000055164	23	65	65	AGCTCCTGCTGTTCATCTGCGGCT	6	+	9563	15435
ENSDARG00000009549	ENSDART00000055164	23	66	66	AGCATCTTAAAGCATGTGCTGAA	5	+	9749	15435
ENSDARG00000009549	ENSDART00000055164	23	67	67	AGCCTCTTCTGGATCTTCTGGTGGA	7	+	9930	15435
ENSDARG00000009549	ENSDART00000055164	23	68	68	CAATTCCTCATCTGTGCGCTGGC	5	+	10152	15435
ENSDARG00000009549	ENSDART00000055164	23	68	68	CGCTCATCCAGTTTCTGCGTTGCT	6	+	10115	15435
ENSDARG00000009549	ENSDART00000055164	23	69	69	AAACAAATCCCAGCAGGAGTTGCT	6	+	10212	15435
ENSDARG00000009549	ENSDART00000055164	23	69	69	CAAATCCCAGCAGGAGTTGCTGCT	6	+	10215	15435
ENSDARG00000009549	ENSDART00000055164	23	69	69	AACAAATCCCAGCAGGAGTTGCT	5	+	10213	15435
ENSDARG00000009549	ENSDART00000055164	23	72	72	CACTCAGCAAGTGGTGAAGTTGAT	6	+	10569	15435
ENSDARG00000009549	ENSDART00000055164	23	73	73	CAAAGCAAAGAAAGTGCAGTTGAC	6	+	10734	15435
ENSDARG00000009549	ENSDART00000055164	23	73	73	GCCTCCAACCTGATGATTGAGTT	5	+	10804	15435
ENSDARG00000009549	ENSDART00000055164	23	74	74	GTATGCAAAACCCTGCTGTGCCGTG	7	+	11040	15435
ENSDARG00000009549	ENSDART00000055164	23	75	75	GTCACCGGCCACAGCTGGAGAGTCT	7	+	11159	15435
ENSDARG00000009549	ENSDART00000055164	23	77	77	TGCTACGGCTGTGCGTCTGCTGTC	6	+	11509	15435
ENSDARG00000009549	ENSDART00000055164	23	77	77	GACTCATCCGAGAGCTGTTTGAGTA	7	+	11606	15435
ENSDARG00000009549	ENSDART00000055164	23	77	77	ACCTTCATCAGCGAGAAGCAGCA	5	+	11390	15435
ENSDARG00000009549	ENSDART00000055164	23	79	79	TTAGACTTCGCTGTGGTGAGTCT	5	+	11858	15435
ENSDARG00000009549	ENSDART00000055164	23	80	80	AAAGACCCCTGTGGTGGTGGAGAAC	7	+	11904	15435
ENSDARG00000009549	ENSDART00000055164	23	80	80	AAAGACCCCTGTGGTGGTGGAGAA	6	+	11904	15435
ENSDARG00000009549	ENSDART00000055164	23	83	83	TCCCTAGCCGCAAGCAGCAGGTTCT	7	+	12359	15435
ENSDARG00000009549	ENSDART00000055164	23	84	84	AGCATCGCAGGAGAGTGTGCTGCT	6	+	12415	15435
ENSDARG00000009549	ENSDART00000055164	23	87	87	AACCAAAGCATTCATGGCTGTGTGC	7	+	12810	15435
ENSDARG00000009549	ENSDART00000055164	23	87	87	ACCAAAGCATTCATGGCTGTGTGC	6	+	12811	15435
ENSDARG00000009549	ENSDART00000055164	23	88	88	GAAGACTTCCTGCAGGGCCGGATGC	7	+	12973	15435
ENSDARG00000009549	ENSDART00000055164	23	88	88	AAAGACCCACAGCAGGAAGACTTC	6	+	12958	15435
ENSDARG00000009549	ENSDART00000055164	23	92	92	AAAATCAACAGGCAGCAGCTGGT	5	+	13450	15435
ENSDARG00000009549	ENSDART00000055164	23	92	92	GTAAAAATCAACAGGCAGCAGCT	5	+	13447	15435
ENSDARG00000009549	ENSDART00000055164	23	93	93	GTTTCAGGCATTGGTGGCTGAGCA	6	+	13515	15435
ENSDARG00000009549	ENSDART00000055164	23	94	94	GTAACCTGCTGCTGACGGGTGATAA	7	+	13643	15435
ENSDARG00000009549	ENSDART00000055164	23	94	94	AGAAAATGCATATCCTGGTGGAGCG	7	+	13781	15435
ENSDARG00000009549	ENSDART00000055164	23	98	98	CTCTGCTTAAACAGATGGAGGAGCT	7	+	14360	15435
ENSDARG00000009549	ENSDART00000055164	23	99	99	AACAAACCCCGCAAGCAGCAGGG	5	+	14500	15435
ENSDARG00000009549	ENSDART00000055164	23	99	99	GCCAACAAAAGTTCTGGGCATCT	5	+	14439	15435
ENSDARG00000009549	ENSDART00000055164	23	99	99	GAACAAACCCCGCAAGCAGCAGGG	6	+	14499	15435
ENSDARG00000009549	ENSDART00000055164	23	102	102	GGCCACATCGAGAGAGGAGAAGAA	6	+	14910	15435
ENSDARG00000009549	ENSDART00000055164	23	103	103	ACAGACAAAGCAGTGAAGGAGTA	5	+	15133	15435
ENSDARG00000009549	ENSDART00000055164	23	103	103	AGACAAAGCAGTGAAGGAGTATGC	6	+	15135	15435
ENSDARG00000009549	ENSDART00000055164	23	103	103	GACAAAGCAGTGAAGGAGTATGC	5	+	15136	15435
ENSDARG00000009549	ENSDART00000055164	23	103	103	CGCTCACCACTTCTCTTCTGGGGTC	7	+	15166	15435
ENSDARG00000009549	ENSDART00000055164	23	104	104	GGCTTCAGAAAGGGTGTTGAGGGC	6	+	15303	15435
ENSDARG00000009549	ENSDART00000055164	23	104	104	GGCTTCAGAAAGGGTGTTGAGGG	5	+	15303	15435
ENSDARG00000009549	ENSDART00000055164	23	105	105	GACATCCCAGACCCGGACGCCTTC	6	+	15394	15435
ENSDARG00000009549	ENSDART00000055168	23	2	2	GCCCGCATCTTACTTGTGTTTGAC	6	+	238	5019
ENSDARG00000009549	ENSDART00000055168	23	2	2	CGCATCTTACTTGTGTTTGACTAC	6	+	241	5019
ENSDARG00000009549	ENSDART00000055168	23	6	6	TACTACTTCCTGGTGCTTTGGAA	5	+	670	5019
ENSDARG00000009549	ENSDART00000055168	23	7	7	TGCTACATCTTTGATCGAAGTGGCA	7	+	870	5019
ENSDARG00000009549	ENSDART00000055168	23	8	8	ACCATCTACACATTGGATGCTGTG	6	+	1024	5019
ENSDARG00000009549	ENSDART00000055168	23	8	8	ACCTGCTGCCCGCCACGCTGCAGCT	7	+	1136	5019
ENSDARG00000009549	ENSDART00000055168	23	8	8	CGCTGCAGCTCATCGACGTCTAC	5	+	1151	5019
ENSDARG00000009549	ENSDART00000055168	23	9	9	CGCTGCAAAGCCAACTTGCTTGGTA	7	+	1285	5019
ENSDARG00000009549	ENSDART00000055168	23	9	9	TGCAAAGCCAACTTGCTTGGTAA	5	+	1288	5019
ENSDARG00000009549	ENSDART00000055168	23	11	11	ATCCACAGCGAAACGCCTTTGCC	5	+	1397	5019
ENSDARG00000009549	ENSDART00000055168	23	12	12	CACTGCTTCCTCTTTTGTTGGAGAG	7	+	1598	5019
ENSDARG00000009549	ENSDART00000055168	23	12	12	GCACACTGCTTCCTCTTTTGTTGGA	7	+	1595	5019
ENSDARG00000009549	ENSDART00000055168	23	12	12	AGCAGCACAGAGAGTGTGGCTGAG	6	+	1621	5019
ENSDARG00000009549	ENSDART00000055168	23	13	13	GTCCGCAAAGCAATGGAGGAGTTC	6	+	1837	5019
ENSDARG00000009549	ENSDART00000055168	23	13	13	GTCCGCAAAGCAATGGAGGAGTT	5	+	1837	5019
ENSDARG00000009549	ENSDART00000055168	23	15	15	ACCTCCTACATCGTGCGGGATAA	5	+	2146	5019
ENSDARG00000009549	ENSDART00000055168	23	17	17	ATCATCTCCTACCTGGCGGATGT	5	+	2455	5019
ENSDARG00000009549	ENSDART00000055168	23	17	17	CCCAGCTCCTGATGGATGGAGAG	5	+	2516	5019
ENSDARG00000009549	ENSDART00000055168	23	17	17	ATCATCTCCTACCTGGCGGATGTG	6	+	2455	5019
ENSDARG00000009549	ENSDART00000055168	23	18	18	TTCACCATCACACAGAAGGAGTT	5	+	2650	5019
ENSDARG00000009549	ENSDART00000055168	23	20	20	ACAAGCCCAAGAAGAGTAGTGTGT	6	+	3002	5019
ENSDARG00000009549	ENSDART00000055168	23	20	20	AGCCCAAGAAGAGTAGTGTGTGTAA	7	+	3005	5019
ENSDARG00000009549	ENSDART00000055168	23	20	20	GAAGTCCCAGCAGTGGAATGAGCT	6	+	2849	5019
ENSDARG00000009549	ENSDART00000055168	23	20	20	GACGGCAAAAACAGCGACGATGAC	6	+	2980	5019
ENSDARG00000009549	ENSDART00000055168	23	21	21	GCAGGCATCAGCGGTGGGCAGCA	5	+	3141	5019
ENSDARG00000009549	ENSDART00000055168	23	21	21	GGCATCAGCGGTGGGCAGCAGCA	5	+	3144	5019
ENSDARG00000009549	ENSDART00000055168	23	22	22	GTCCTCTCCTCACGGACGTAGAC	5	+	3366	5019
ENSDARG00000009549	ENSDART00000055168	23	22	22	CTCATCAGCGCTCATGTGTTGCG	5	+	3322	5019
ENSDARG00000009549	ENSDART00000055168	23	24	24	TTAGCCATCATAACTGCAGATTTC	6	+	3703	5019
ENSDARG00000009549	ENSDART00000055168	23	24	24	TTCAGCAGCACAGGCTCTGTGTCT	6	+	3598	5019
ENSDARG00000009549	ENSDART00000055168	23	26	26	TACTCCCACGTCCTGCAGATGCT	5	+	4006	5019
ENSDARG00000009549	ENSDART00000055168	23	26	26	TGCTGCCACAGTGAGCCGCAGTA	5	+	4059	5019
ENSDARG00000009549	ENSDART00000055168	23	26	26	TTACTCCCACGTCCTGCAGATGCT	6	+	4005	5019
ENSDARG00000009549	ENSDART00000055168	23	29	29	ACCAGCAGCTGACAGAGGTGGAGTT	7	+	4547	5019
ENSDARG00000009549	ENSDART00000055168	23	29	29	ACCAGCAGCTGACAGAGGTGGAG	5	+	4547	5019
ENSDARG00000009549	ENSDART00000055168	23	30	30	AGCTCAACAGACATTTTTGATGGC	6	+	4882	5019
ENSDARG00000009549	ENSDART00000104228	23	3	3	GTCCCCAGAAATCAGTTGCTGTC	5	+	226	1365
ENSDARG00000009549	ENSDART00000104228	23	4	4	ATCATCACCTTTACTGCGATGAT	5	+	394	1365
ENSDARG00000009549	ENSDART00000104228	23	7	7	ATCAACCGCTTCCAGGACGCGGTA	6	+	760	1365
ENSDARG00000009549	ENSDART00000104228	23	8	8	AGCTGCCTCTATGCAGGTGGGTTC	6	+	955	1365
ENSDARG00000009549	ENSDART00000104228	23	8	8	CTAAGCTGCCTCTATGCAGGTGGG	6	+	952	1365
ENSDARG00000009549	ENSDART00000104228	23	9	9	TCCACCGGCTCCAAGGAGGAAGAC	6	+	1036	1365
ENSDARG00000009549	ENSDART00000104228	23	11	11	AGCCCCACAGCCCTGGCTGATAA	5	+	1225	1365
ENSDARG00000009822	ENSDART00000011594	23	2	2	GCCTCCTGCACACATCTGGAGCG	5	-	256	456
ENSDARG00000009822	ENSDART00000011594	23	2	2	AGCTTCATCAGTCTTGTGTGGCTCT	7	-	314	456
ENSDARG00000009822	ENSDART00000011594	23	2	2	AGCTTCATCAGTCTTGTGTGGCT	5	-	316	456
ENSDARG00000009886	ENSDART00000019667	23	1	1	CAAACCGACGTAAACGATGCTGAA	6	+	34	663
ENSDARG00000009886	ENSDART00000019667	23	2	2	CCCCAAAGCCCAGTGTGTGCCGTC	6	+	163	663
ENSDARG00000009886	ENSDART00000019667	23	2	2	CCCAAAGCCCAGTGTGTGCCGTC	5	+	164	663
ENSDARG00000009886	ENSDART00000019667	23	2	2	CAAAGCCCAGTGTGTGCCGTCTGC	6	+	166	663
ENSDARG00000009886	ENSDART00000019667	23	2	2	AACGACTGCCTTCAGGAGTGTCT	5	+	136	663
ENSDARG00000009886	ENSDART00000019667	23	4	4	ACCTGCCCCTACTGTAAGAAGCA	5	+	412	663
ENSDARG00000009886	ENSDART00000019667	23	4	4	TGCCCCTACTGTAAGAAGCAGAA	5	+	415	663
ENSDARG00000009886	ENSDART00000019667	23	5	5	TCCCAATTACAAGAGTGCAGACTTC	7	+	537	663
ENSDARG00000009899	ENSDART00000003548	23	2	2	TTCCCCGTCACCTACCGGAGCCTTG	7	+	243	1125
ENSDARG00000009899	ENSDART00000003548	23	4	4	CTCTTCGTCCCCCAGCTGTGGCT	5	+	477	1125
ENSDARG00000009899	ENSDART00000003548	23	4	4	CTCTTCGTCCCCCAGCTGTGGCTCT	7	+	477	1125
ENSDARG00000009899	ENSDART00000003548	23	5	5	AACTGCAGCTCAAACAGGTGAGTAA	7	+	827	1125
ENSDARG00000009899	ENSDART00000003548	23	5	5	AAACACAAAACCATTCTGGAGGC	5	+	664	1125
ENSDARG00000009899	ENSDART00000003548	23	5	5	CTAAACACAAAACCATTCTGGAGGC	7	+	662	1125
ENSDARG00000009899	ENSDART00000003548	23	6	6	GAAGGCATCGGGACGGCGTTGCG	5	+	857	1125
ENSDARG00000009899	ENSDART00000003548	23	6	6	TGCAGCACATATCAAGTCGAAGGC	6	+	839	1125
ENSDARG00000009899	ENSDART00000003548	23	8	8	TGCCAAGTCCCCTAGCTGTAGCT	5	+	977	1125
ENSDARG00000009899	ENSDART00000003548	23	8	8	CTCACCAAAGCATTAGGCGCCGGC	6	+	949	1125
ENSDARG00000009899	ENSDART00000003548	23	8	8	CAAGTCCCCTAGCTGTAGCTGCA	5	+	980	1125
ENSDARG00000010052	ENSDART00000010258	23	5	4	AAATCACCCAGCACTTTGCTGTG	5	+	254	1113
ENSDARG00000010052	ENSDART00000010258	23	5	4	GAAATCACCCAGCACTTTGCTGTG	6	+	253	1113
ENSDARG00000010052	ENSDART00000010258	23	7	6	TTCAACAGAATCAATAGTGTGATTG	7	+	385	1113
ENSDARG00000010052	ENSDART00000010258	23	12	11	AGACACATCACCAGCGGTAGAGGCT	7	+	792	1113
ENSDARG00000010052	ENSDART00000010258	23	12	11	ATCACCAGCGGTAGAGGCTGTGGTG	7	+	798	1113
ENSDARG00000010052	ENSDART00000010258	23	12	11	CACATCACCAGCGGTAGAGGCTGTG	7	+	795	1113
ENSDARG00000010052	ENSDART00000104881	23	2	2	GAAATCACCCAGCACTTTGCTGTG	6	+	163	1062
ENSDARG00000010052	ENSDART00000104881	23	2	2	AAATCACCCAGCACTTTGCTGTG	5	+	164	1062
ENSDARG00000010052	ENSDART00000104881	23	4	4	TTCAACAGAATCAATAGTGTGATTG	7	+	295	1062
ENSDARG00000010052	ENSDART00000104881	23	9	9	AGACACATCACCAGCGGTAGAGGCT	7	+	702	1062
ENSDARG00000010052	ENSDART00000104881	23	9	9	ATCACCAGCGGTAGAGGCTGTGGTG	7	+	708	1062
ENSDARG00000010052	ENSDART00000104881	23	9	9	CACATCACCAGCGGTAGAGGCTGTG	7	+	705	1062
ENSDARG00000010052	ENSDART00000104883	23	1	1	GAAAGCTTCTGCAAGGCTGTTGAC	6	+	36	1110
ENSDARG00000010052	ENSDART00000104883	23	1	1	AGCTTCTGCAAGGCTGTTGACTAA	6	+	39	1110
ENSDARG00000010052	ENSDART00000104883	23	4	4	AAATCACCCAGCACTTTGCTGTG	5	+	251	1110
ENSDARG00000010052	ENSDART00000104883	23	4	4	GAAATCACCCAGCACTTTGCTGTG	6	+	250	1110
ENSDARG00000010052	ENSDART00000104883	23	6	6	TTCAACAGAATCAATAGTGTGATTG	7	+	382	1110
ENSDARG00000010052	ENSDART00000104883	23	11	11	AGACACATCACCAGCGGTAGAGGCT	7	+	789	1110
ENSDARG00000010052	ENSDART00000104883	23	11	11	ATCACCAGCGGTAGAGGCTGTGGTG	7	+	795	1110
ENSDARG00000010052	ENSDART00000104883	23	11	11	CACATCACCAGCGGTAGAGGCTGTG	7	+	792	1110
ENSDARG00000010124	ENSDART00000024283	23	2	2	GTACACACACCGGGGAGAAGCGTTT	7	+	914	1071
ENSDARG00000010124	ENSDART00000024283	23	2	2	CTACTCGTCGCTGTCGCCGATGCA	6	+	668	1071
ENSDARG00000010124	ENSDART00000024283	23	2	2	CACCTCAAAGCGCACCTGCGCTGGC	7	+	805	1071
ENSDARG00000010124	ENSDART00000024283	23	2	2	AGCCTCCTCACAGCGGGACTGATGC	7	+	1031	1071
ENSDARG00000010124	ENSDART00000024283	23	2	2	ACACACACCGGGGAGAAGCGTTT	5	+	916	1071
ENSDARG00000010124	ENSDART00000103691	23	3	3	ACACACACCGGGGAGAAGCGTTT	5	+	877	978
ENSDARG00000010124	ENSDART00000103691	23	3	3	CACCTCAAAGCGCACCTGCGCTGGC	7	+	766	978
ENSDARG00000010124	ENSDART00000103691	23	3	3	CTACTCGTCGCTGTCGCCGATGCA	6	+	629	978
ENSDARG00000010124	ENSDART00000103691	23	3	3	GTACACACACCGGGGAGAAGCGTTT	7	+	875	978
ENSDARG00000010515	ENSDART00000035755	23	4	4	GGCTCCATCATGAAAGGCGGAGCG	6	+	382	1770
ENSDARG00000010515	ENSDART00000035755	23	7	7	ATCCCATAAGAGGTCTTCTGTTGGT	7	+	693	1770
ENSDARG00000010515	ENSDART00000035755	23	9	9	AAAATCACCTTCTCGGAGCAGTG	5	+	976	1770
ENSDARG00000010515	ENSDART00000035755	23	12	12	GCCCCCAAAACAGCCGCAGGCAAC	6	+	1630	1770
ENSDARG00000010515	ENSDART00000035755	23	12	12	CTCTTCTTATGGCCCGCCGGGTTT	6	+	1578	1770
ENSDARG00000010515	ENSDART00000035755	23	12	12	CTCGCCCCCAAAACAGCCGCAGGC	6	+	1627	1770
ENSDARG00000010515	ENSDART00000035755	23	12	12	CCCCCAAAACAGCCGCAGGCAAC	5	+	1631	1770
ENSDARG00000010515	ENSDART00000035755	23	12	12	CAAGGCACCCTGCTGTGGGGGGAG	6	+	1326	1770
ENSDARG00000010515	ENSDART00000035755	23	12	12	CAAGGCACCCTGCTGTGGGGGGA	5	+	1326	1770
ENSDARG00000010515	ENSDART00000035755	23	12	12	ACACAAGGCACCCTGCTGTGGGGGG	7	+	1323	1770
ENSDARG00000010515	ENSDART00000035755	23	12	12	ACACAAGGCACCCTGCTGTGGGG	5	+	1323	1770
ENSDARG00000010515	ENSDART00000076374	23	4	4	GGCTCCATCATGAAAGGCGGAGCG	6	+	358	1686
ENSDARG00000010515	ENSDART00000076374	23	9	9	AAAATCACCTTCTCGGAGCAGTG	5	+	901	1686
ENSDARG00000010515	ENSDART00000076374	23	11	11	GCCCCCAAAACAGCCGCAGGCAAC	6	+	1546	1686
ENSDARG00000010515	ENSDART00000076374	23	11	11	CTCTTCTTATGGCCCGCCGGGTTT	6	+	1494	1686
ENSDARG00000010515	ENSDART00000076374	23	11	11	CTCGCCCCCAAAACAGCCGCAGGC	6	+	1543	1686
ENSDARG00000010515	ENSDART00000076374	23	11	11	CCCCCAAAACAGCCGCAGGCAAC	5	+	1547	1686
ENSDARG00000010515	ENSDART00000076374	23	11	11	CAAGGCACCCTGCTGTGGGGGGAG	6	+	1242	1686
ENSDARG00000010515	ENSDART00000076374	23	11	11	CAAGGCACCCTGCTGTGGGGGGA	5	+	1242	1686
ENSDARG00000010515	ENSDART00000076374	23	11	11	ACACAAGGCACCCTGCTGTGGGGGG	7	+	1239	1686
ENSDARG00000010515	ENSDART00000076374	23	11	11	ACACAAGGCACCCTGCTGTGGGG	5	+	1239	1686
ENSDARG00000011049	ENSDART00000002714	23	1	1	CCCCGCAGATAATATCGGAGCAGCC	7	+	72	1404
ENSDARG00000011049	ENSDART00000002714	23	3	3	GTTGTCAGCGGCTGCATGGGGAGCA	7	+	363	1404
ENSDARG00000011049	ENSDART00000002714	23	6	6	TACCCAAGAGGAACTGGCTGCGGCT	7	+	761	1404
ENSDARG00000011049	ENSDART00000002714	23	6	6	CCCATCATCACACTGGAGTCTCT	5	+	712	1404
ENSDARG00000011049	ENSDART00000002714	23	8	8	TCCCTCTTCCCTGTTTAGTGGCT	5	+	942	1404
ENSDARG00000011049	ENSDART00000002714	23	10	10	CACCACCACCTTTCCTGCAGCTGTG	7	+	1074	1404
ENSDARG00000011049	ENSDART00000002714	23	10	10	ACCACCACCTTTCCTGCAGCTGTG	6	+	1075	1404
ENSDARG00000011049	ENSDART00000002714	23	11	11	TGCTCCCTCCTGTGCCGGTGCTTTG	7	+	1179	1404
ENSDARG00000011049	ENSDART00000002714	23	13	13	TTCGGCCTCATTACAGTGGTCAAC	6	+	1300	1404
ENSDARG00000011196	ENSDART00000016096	23	1	1	GGCGGCGGCCTTGGAGGAAGATGAA	7	+	12	1692
ENSDARG00000011196	ENSDART00000016096	23	2	2	CAAGGCTTCATATCGCCGTCTTT	5	+	99	1692
ENSDARG00000011196	ENSDART00000016096	23	6	6	CTCGGCTAAAGGCTGGGGAGAGGTG	7	+	633	1692
ENSDARG00000011196	ENSDART00000016096	23	6	6	CACCTCGGCTAAAGGCTGGGGAGAG	7	+	630	1692
ENSDARG00000011196	ENSDART00000016096	23	6	6	CACCTCGGCTAAAGGCTGGGGAG	5	+	630	1692
ENSDARG00000011196	ENSDART00000016096	23	6	6	AGACACGGCAGTTCTTTCTGGCTCT	7	+	549	1692
ENSDARG00000011196	ENSDART00000016096	23	8	8	CACAACAGCTCATTGTGGCTTGC	5	+	732	1692
ENSDARG00000011196	ENSDART00000016096	23	11	11	ATCCACTTAACAGAGCAGCTTCT	5	+	1156	1692
ENSDARG00000011196	ENSDART00000016096	23	11	11	AGCTTCTTCCCAGCGCTGTGTTT	5	+	1172	1692
ENSDARG00000011196	ENSDART00000016096	23	12	12	AGAGGCAGAAGCAGCTGTGAGTTC	6	+	1332	1692
ENSDARG00000011196	ENSDART00000016096	23	14	14	AGCTCATGCTCACAGAAGCATCT	5	+	1523	1692
ENSDARG00000011196	ENSDART00000016096	23	14	14	TGCCTCTACAGTGTCTGGTGAAGGA	7	+	1493	1692
ENSDARG00000011196	ENSDART00000032006	23	1	1	GGCGGCGGCCTTGGAGGAAGATGAA	7	+	12	237
ENSDARG00000011196	ENSDART00000032006	23	2	2	CAAGGCTTCATATCGCCGTCTTT	5	+	99	237
ENSDARG00000011197	ENSDART00000061624	23	1	1	GGCAGCCACTGGATTAATTTGAA	5	+	85	1569
ENSDARG00000011197	ENSDART00000061624	23	2	2	AGAACCTACTGGGATTTTGAGTTT	6	+	760	1569
ENSDARG00000011197	ENSDART00000061624	23	2	2	AGAACCTACTGGGATTTTGAGTT	5	+	760	1569
ENSDARG00000011197	ENSDART00000061624	23	2	2	TTAATCAGAACCTACTGGGATTTT	6	+	754	1569
ENSDARG00000011197	ENSDART00000061624	23	2	2	AACTTCAAATATATCGGAGGGCTTC	7	+	802	1569
ENSDARG00000011197	ENSDART00000061624	23	4	4	GAAACCAGATACTCTTGGTGAAAAC	7	+	1011	1569
ENSDARG00000011197	ENSDART00000061624	23	5	5	GTCGGCATCCCCTTGTTTGGTGAC	6	+	1156	1569
ENSDARG00000011197	ENSDART00000061624	23	6	6	TGCAAAACACCTGCGTGTGGAGGCC	7	+	1404	1569
ENSDARG00000011197	ENSDART00000061624	23	6	6	TGCAAAACACCTGCGTGTGGAGGC	6	+	1404	1569
ENSDARG00000011197	ENSDART00000061624	23	6	6	GCCAAATTCTTCATCATGCGCTGCT	7	+	1522	1569
ENSDARG00000011197	ENSDART00000061624	23	6	6	GCAAAACACCTGCGTGTGGAGGCC	6	+	1405	1569
ENSDARG00000011197	ENSDART00000061624	23	6	6	GCAAAACACCTGCGTGTGGAGGC	5	+	1405	1569
ENSDARG00000011197	ENSDART00000061624	23	6	6	CACGACAGACCAATGAAGCCTTT	5	+	1336	1569
ENSDARG00000011197	ENSDART00000061624	23	6	6	CAAAACACCTGCGTGTGGAGGCC	5	+	1406	1569
ENSDARG00000011197	ENSDART00000061624	23	6	6	AAATTCTTCATCATGCGCTGCTGCT	7	+	1525	1569
ENSDARG00000011298	ENSDART00000013563	23	1	1	GACGACAAACCTTTTATGTGCAGTG	7	+	16	1491
ENSDARG00000011298	ENSDART00000013563	23	3	3	CCCCAAGGCCCAGGAAGATGAGGAC	7	+	243	1491
ENSDARG00000011298	ENSDART00000013563	23	4	4	GACGCCTTCAGACGTGAAGGTGAA	6	+	327	1491
ENSDARG00000011298	ENSDART00000013563	23	4	4	GCCTTCAGACGTGAAGGTGAAGGA	6	+	330	1491
ENSDARG00000011298	ENSDART00000013563	23	7	7	GGCCTCCACTAGGGGGCAGCAGCA	6	+	749	1491
ENSDARG00000011298	ENSDART00000013563	23	8	8	ATCCTCCGCTCAGGGTTGTCTTG	5	+	852	1491
ENSDARG00000011298	ENSDART00000013563	23	8	8	ACATCCTCCGCTCAGGGTTGTCT	5	+	850	1491
ENSDARG00000011298	ENSDART00000013563	23	8	8	ACATCCTCCGCTCAGGGTTGTCTTG	7	+	850	1491
ENSDARG00000011298	ENSDART00000013563	23	8	8	GACATCCTCCGCTCAGGGTTGTCT	6	+	849	1491
ENSDARG00000011298	ENSDART00000013563	23	9	9	GGCAGCGGCTTCACGTTGCAGGC	5	+	1065	1491
ENSDARG00000011298	ENSDART00000013563	23	9	9	CTCAGCCCACCGGGGGTCGCAGGC	6	+	983	1491
ENSDARG00000011298	ENSDART00000013563	23	9	9	CGCTCAGCCCACCGGGGGTCGCA	5	+	981	1491
ENSDARG00000011298	ENSDART00000013563	23	9	9	AGAAACGCAAGATATGGGTGAAC	5	+	1088	1491
ENSDARG00000011298	ENSDART00000013563	23	10	10	CTCACCTACGAAACGAAGTTGCT	5	+	1172	1491
ENSDARG00000011298	ENSDART00000013563	23	11	11	CAATCCCACCCGTCCAGCAGATGAT	7	+	1480	1491
ENSDARG00000011298	ENSDART00000013563	23	11	11	ATCCCACCCGTCCAGCAGATGAT	5	+	1482	1491
ENSDARG00000011298	ENSDART00000013563	23	11	11	CCCAGCCCCTCGTCTGTAGTGGGA	6	+	1342	1491
ENSDARG00000011298	ENSDART00000013563	23	11	11	GCCCCCAGCCCCTCGTCTGTAGTG	6	+	1339	1491
ENSDARG00000011298	ENSDART00000013563	23	11	11	GCAGCCAGCAGGGTGGCAGTGGCG	6	+	1430	1491
ENSDARG00000011298	ENSDART00000013563	23	11	11	CCCCCAGCCCCTCGTCTGTAGTG	5	+	1340	1491
ENSDARG00000011298	ENSDART00000103605	23	1	1	GACGACAAACCTTTTATGTGCAGTG	7	+	16	1092
ENSDARG00000011298	ENSDART00000103605	23	3	3	CCCCAAGGCCCAGGAAGATGAGGAC	7	+	243	1092
ENSDARG00000011298	ENSDART00000103605	23	4	4	GACGCCTTCAGACGTGAAGGTGAA	6	+	327	1092
ENSDARG00000011298	ENSDART00000103605	23	4	4	GCCTTCAGACGTGAAGGTGAAGGA	6	+	330	1092
ENSDARG00000011298	ENSDART00000103605	23	7	7	GGCCTCCACTAGGGGGCAGCAGCA	6	+	749	1092
ENSDARG00000011298	ENSDART00000103605	23	8	8	ATCCTCCGCTCAGGGTTGTCTTG	5	+	852	1092
ENSDARG00000011298	ENSDART00000103605	23	8	8	GACATCCTCCGCTCAGGGTTGTCT	6	+	849	1092
ENSDARG00000011298	ENSDART00000103605	23	8	8	ACATCCTCCGCTCAGGGTTGTCTTG	7	+	850	1092
ENSDARG00000011298	ENSDART00000103605	23	8	8	ACATCCTCCGCTCAGGGTTGTCT	5	+	850	1092
ENSDARG00000011298	ENSDART00000103605	23	9	9	CGCTCAGCCCACCGGGGGTCGCA	5	+	981	1092
ENSDARG00000011298	ENSDART00000103605	23	10	10	GGCAGCGGCTTCACGTTGCAGGC	5	+	1061	1092
ENSDARG00000011298	ENSDART00000103605	23	10	10	AGAAACGCAAGATATGGGTGAAC	5	+	1084	1092
ENSDARG00000011298	ENSDART00000103606	23	1	1	GACGACAAACCTTTTATGTGCAGTG	7	+	16	1350
ENSDARG00000011298	ENSDART00000103606	23	3	3	CCCCAAGGCCCAGGAAGATGAGGAC	7	+	243	1350
ENSDARG00000011298	ENSDART00000103606	23	4	4	GCCTTCAGACGTGAAGGTGAAGGA	6	+	330	1350
ENSDARG00000011298	ENSDART00000103606	23	4	4	GACGCCTTCAGACGTGAAGGTGAA	6	+	327	1350
ENSDARG00000011298	ENSDART00000103606	23	9	9	GGCCTCCACTAGGGGGCAGCAGCA	6	+	776	1350
ENSDARG00000011298	ENSDART00000103606	23	10	10	GGCAGCGGCTTCACGTTGCAGGC	5	+	942	1350
ENSDARG00000011298	ENSDART00000103606	23	10	10	AGAAACGCAAGATATGGGTGAAC	5	+	965	1350
ENSDARG00000011298	ENSDART00000103606	23	10	10	CTCAGCCCACCGGGGGTCGCAGGC	6	+	860	1350
ENSDARG00000011298	ENSDART00000103606	23	10	10	CGCTCAGCCCACCGGGGGTCGCA	5	+	858	1350
ENSDARG00000011298	ENSDART00000103606	23	11	11	CTCACCTACGAAACGAAGTTGCT	5	+	1049	1350
ENSDARG00000011298	ENSDART00000103606	23	12	12	CCCCCAGCCCCTCGTCTGTAGTG	5	+	1199	1350
ENSDARG00000011298	ENSDART00000103606	23	12	12	GCAGCCAGCAGGGTGGCAGTGGCG	6	+	1289	1350
ENSDARG00000011298	ENSDART00000103606	23	12	12	GCCCCCAGCCCCTCGTCTGTAGTG	6	+	1198	1350
ENSDARG00000011298	ENSDART00000103606	23	12	12	ATCCCACCCGTCCAGCAGATGAT	5	+	1341	1350
ENSDARG00000011298	ENSDART00000103606	23	12	12	CCCAGCCCCTCGTCTGTAGTGGGA	6	+	1201	1350
ENSDARG00000011298	ENSDART00000103606	23	12	12	CAATCCCACCCGTCCAGCAGATGAT	7	+	1339	1350
ENSDARG00000011400	ENSDART00000023537	23	1	1	CACCGCTGCTTTGTAGATGTCGTT	6	-	13	483
ENSDARG00000011400	ENSDART00000023537	23	1	1	AGACTCACCGCTGCTTTGTAGAT	5	-	19	483
ENSDARG00000011490	ENSDART00000013630	23	1	1	AGCCACGCCGTAGAGGACGTAGCC	6	-	94	2022
ENSDARG00000011490	ENSDART00000013630	23	4	4	CACCTATGCAGCTCTGGATGCTGCT	7	-	442	2022
ENSDARG00000011490	ENSDART00000013630	23	6	6	CTCCCCTTATGCTTCGGGTGCAGGT	7	-	536	2022
ENSDARG00000011490	ENSDART00000013630	23	7	7	CGCGTCACCTCTTTATTTGTCGGG	6	-	684	2022
ENSDARG00000011490	ENSDART00000013630	23	8	8	ATCTGCTGCTCCATGTGCTGCCGTT	7	-	776	2022
ENSDARG00000011490	ENSDART00000013630	23	8	8	TCCAGCGACACGCAGCAGGAAAC	5	-	845	2022
ENSDARG00000011490	ENSDART00000013630	23	8	8	TGCTGCTCCATGTGCTGCCGTTGAC	7	-	773	2022
ENSDARG00000011490	ENSDART00000013630	23	8	8	TGCTTCAACGCTGTCTGTGTGAGCT	7	-	890	2022
ENSDARG00000011490	ENSDART00000013630	23	8	8	TTCATCTGCTGCTCCATGTGCTGCC	7	-	779	2022
ENSDARG00000011490	ENSDART00000013630	23	8	8	TTCTCCTGCTTCAACGCTGTCTGT	6	-	897	2022
ENSDARG00000011490	ENSDART00000013630	23	9	9	ACCTGCACATGACGTGATGTTGCG	6	-	1099	2022
ENSDARG00000011490	ENSDART00000013630	23	11	11	GGCTCCGTCAAAGTCTGTGGTGGTG	7	-	1404	2022
ENSDARG00000011490	ENSDART00000013630	23	11	11	GGCTCCGTCAAAGTCTGTGGTGGT	6	-	1405	2022
ENSDARG00000011490	ENSDART00000013630	23	11	11	TCCGTCAAAGTCTGTGGTGGTGTT	6	-	1402	2022
ENSDARG00000011490	ENSDART00000013630	23	11	11	TCCGTCAAAGTCTGTGGTGGTGTTT	7	-	1401	2022
ENSDARG00000011490	ENSDART00000013630	23	12	12	ACACTCCACATTGGCTGGGTAGTTT	7	-	1515	2022
ENSDARG00000011490	ENSDART00000013630	23	12	12	ACAATCAGAATCTTGCGTTTGTG	5	-	1561	2022
ENSDARG00000011490	ENSDART00000013630	23	12	12	CACTCCACATTGGCTGGGTAGTTT	6	-	1515	2022
ENSDARG00000011490	ENSDART00000013630	23	12	12	CACTCCACATTGGCTGGGTAGTT	5	-	1516	2022
ENSDARG00000011490	ENSDART00000013630	23	12	12	ACACTCCACATTGGCTGGGTAGTT	6	-	1516	2022
ENSDARG00000011490	ENSDART00000013630	23	12	12	ACACACTCCACATTGGCTGGGTAG	6	-	1518	2022
ENSDARG00000011490	ENSDART00000013630	23	12	12	ACACACTCCACATTGGCTGGGTA	5	-	1519	2022
ENSDARG00000011490	ENSDART00000013630	23	13	13	GTTCACATCATTGGATTTGAAGTT	6	-	1738	2022
ENSDARG00000011490	ENSDART00000102879	23	2	2	CACCTATGCAGCTCTGGATGCTGCT	7	-	160	1728
ENSDARG00000011490	ENSDART00000102879	23	3	3	CTCCCCTTATGCTTCGGGTGCAGGT	7	-	242	1728
ENSDARG00000011490	ENSDART00000102879	23	4	4	CGCGTCACCTCTTTATTTGTCGGG	6	-	390	1728
ENSDARG00000011490	ENSDART00000102879	23	5	5	TCCAGCGACACGCAGCAGGAAAC	5	-	551	1728
ENSDARG00000011490	ENSDART00000102879	23	5	5	TTCATCTGCTGCTCCATGTGCTGCC	7	-	485	1728
ENSDARG00000011490	ENSDART00000102879	23	5	5	ATCTGCTGCTCCATGTGCTGCCGTT	7	-	482	1728
ENSDARG00000011490	ENSDART00000102879	23	5	5	TGCTGCTCCATGTGCTGCCGTTGAC	7	-	479	1728
ENSDARG00000011490	ENSDART00000102879	23	5	5	TGCTTCAACGCTGTCTGTGTGAGCT	7	-	596	1728
ENSDARG00000011490	ENSDART00000102879	23	5	5	TTCTCCTGCTTCAACGCTGTCTGT	6	-	603	1728
ENSDARG00000011490	ENSDART00000102879	23	6	6	ACCTGCACATGACGTGATGTTGCG	6	-	805	1728
ENSDARG00000011490	ENSDART00000102879	23	8	8	TCCGTCAAAGTCTGTGGTGGTGTTT	7	-	1107	1728
ENSDARG00000011490	ENSDART00000102879	23	8	8	TCCGTCAAAGTCTGTGGTGGTGTT	6	-	1108	1728
ENSDARG00000011490	ENSDART00000102879	23	8	8	GGCTCCGTCAAAGTCTGTGGTGGT	6	-	1111	1728
ENSDARG00000011490	ENSDART00000102879	23	8	8	GGCTCCGTCAAAGTCTGTGGTGGTG	7	-	1110	1728
ENSDARG00000011490	ENSDART00000102879	23	9	9	CACTCCACATTGGCTGGGTAGTTT	6	-	1221	1728
ENSDARG00000011490	ENSDART00000102879	23	9	9	CACTCCACATTGGCTGGGTAGTT	5	-	1222	1728
ENSDARG00000011490	ENSDART00000102879	23	9	9	ACACTCCACATTGGCTGGGTAGTTT	7	-	1221	1728
ENSDARG00000011490	ENSDART00000102879	23	9	9	ACACTCCACATTGGCTGGGTAGTT	6	-	1222	1728
ENSDARG00000011490	ENSDART00000102879	23	9	9	ACACACTCCACATTGGCTGGGTAG	6	-	1224	1728
ENSDARG00000011490	ENSDART00000102879	23	9	9	ACACACTCCACATTGGCTGGGTA	5	-	1225	1728
ENSDARG00000011490	ENSDART00000102879	23	9	9	ACAATCAGAATCTTGCGTTTGTG	5	-	1267	1728
ENSDARG00000011490	ENSDART00000102879	23	10	10	GTTCACATCATTGGATTTGAAGTT	6	-	1444	1728
ENSDARG00000011510	ENSDART00000010647	23	2	1	CAAACCCGCTTTAGCTGCTGGTTTT	7	-	150	1485
ENSDARG00000011510	ENSDART00000010647	23	2	1	TGCAAACCCGCTTTAGCTGCTGGT	6	-	153	1485
ENSDARG00000011510	ENSDART00000010647	23	3	2	GGCCCCAAAAATGAGCAGCTGAC	5	-	239	1485
ENSDARG00000011510	ENSDART00000010647	23	4	3	CACCCCAGCTCCAGAGTTTGCCTTC	7	-	430	1485
ENSDARG00000011510	ENSDART00000010647	23	4	3	CTCACCCCAGCTCCAGAGTTTGCC	6	-	433	1485
ENSDARG00000011510	ENSDART00000010647	23	5	4	GTTAAAGCCAAGGTGTGGTTTCT	5	-	559	1485
ENSDARG00000011510	ENSDART00000010647	23	11	10	GTCCCCAGCTAATAGTGCTGTCGTC	7	-	1267	1485
ENSDARG00000011510	ENSDART00000010647	23	13	12	TTCTCCTTCTCTTGCTCTGTGTCT	6	-	1434	1485
ENSDARG00000011510	ENSDART00000010647	23	13	12	CACATCAGAGAGTGCGTGGATTGT	6	-	1478	1485
ENSDARG00000011549	ENSDART00000018441	23	1	1	GTCCACAGCACAAAAGGAGGAGGAG	7	+	46	711
ENSDARG00000011549	ENSDART00000018441	23	1	1	GTCCACAGCACAAAAGGAGGAGGA	6	+	46	711
ENSDARG00000011549	ENSDART00000018441	23	1	1	CACAGCACAAAAGGAGGAGGAGCC	6	+	49	711
ENSDARG00000011549	ENSDART00000018441	23	2	2	TTCCTCATCTACGCCGACTGATGC	6	+	703	711
ENSDARG00000011570	ENSDART00000011925	23	4	3	TTCATCACCCCCAGACTCTGCAGCC	7	-	183	1830
ENSDARG00000011570	ENSDART00000011925	23	4	3	AGACTCTGCAGCCCCTGCAGAAGAT	7	-	171	1830
ENSDARG00000011570	ENSDART00000011925	23	4	3	TCCACCTCCAGCACACGGATGGTCT	7	-	131	1830
ENSDARG00000011570	ENSDART00000011925	23	5	4	ACAGTCTGCACTACAGGTGCTGAA	6	-	300	1830
ENSDARG00000011570	ENSDART00000011925	23	6	5	GCCTCCAGCAGGACTGGCAGCAGCG	7	-	570	1830
ENSDARG00000011570	ENSDART00000011925	23	7	6	GTTCAACACAGTAGCAGCTGGAGGA	7	-	618	1830
ENSDARG00000011570	ENSDART00000011925	23	7	6	GCCTTCTGCACAATAGACGCAGTG	6	-	741	1830
ENSDARG00000011570	ENSDART00000011925	23	7	6	GCCTGCGCAGGTGCCTGAAGCTGGG	7	-	653	1830
ENSDARG00000011570	ENSDART00000011925	23	7	6	TTCAACACAGTAGCAGCTGGAGGA	6	-	618	1830
ENSDARG00000011570	ENSDART00000011925	23	7	6	TTCTGCACAATAGACGCAGTGGTG	6	-	738	1830
ENSDARG00000011570	ENSDART00000011925	23	8	7	AGACGCTGCACTAATCTGGAGAA	5	-	821	1830
ENSDARG00000011570	ENSDART00000011925	23	9	8	AGCTCCAGCCAAAGAAGCGGGGTTG	7	-	984	1830
ENSDARG00000011570	ENSDART00000011925	23	9	8	TGCAGCTCCAGCCAAAGAAGCGGGG	7	-	987	1830
ENSDARG00000011570	ENSDART00000011925	23	10	9	GACACCGGCAGCCGTGAGTGAGGT	6	-	1264	1830
ENSDARG00000011570	ENSDART00000011925	23	11	10	CTCTTCATCTTTCACAGCAGACGGC	7	-	1332	1830
ENSDARG00000011570	ENSDART00000011925	23	11	10	GTCAAACCCAGAGAGAGCCGTCGAA	7	-	1403	1830
ENSDARG00000011570	ENSDART00000011925	23	11	10	AAACCCAGAGAGAGCCGTCGAATCT	7	-	1400	1830
ENSDARG00000011570	ENSDART00000011925	23	12	11	TTCAGCTTCTGCGCACTTTTAGGAG	7	-	1517	1830
ENSDARG00000011570	ENSDART00000011925	23	12	11	AGCTTCTGCGCACTTTTAGGAGTG	6	-	1515	1830
ENSDARG00000011570	ENSDART00000011925	23	12	11	TTCTGCGCACTTTTAGGAGTGATGT	7	-	1511	1830
ENSDARG00000011704	ENSDART00000011715	23	3	3	TCCGTCTCCAAGAGTGGCGTGAGCA	7	-	252	1134
ENSDARG00000011704	ENSDART00000011715	23	4	4	CACCTCCTCCTCATAGCGGAAGAT	6	-	397	1134
ENSDARG00000011704	ENSDART00000011715	23	4	4	CTCCTCCTCATAGCGGAAGATGTC	6	-	394	1134
ENSDARG00000011704	ENSDART00000011715	23	4	4	ACCTCCTCCTCATAGCGGAAGAT	5	-	397	1134
ENSDARG00000011704	ENSDART00000011715	23	5	5	GGCGGCGGCTCATAGTAGGTGGT	5	-	532	1134
ENSDARG00000011704	ENSDART00000011715	23	6	6	CTCCTCTTCCTCAGGCTCTGCTTCT	7	-	687	1134
ENSDARG00000011704	ENSDART00000011715	23	7	7	AGCTCCAGCCGGAGGGAGATTCT	5	-	818	1134
ENSDARG00000011704	ENSDART00000011715	23	10	10	AAACTCGCCTTTAAAGCTGATGTA	6	-	1017	1134
ENSDARG00000011704	ENSDART00000011715	23	11	11	TCCAACAAACAGCTGATGACTGT	5	-	1090	1134
ENSDARG00000011704	ENSDART00000018478	23	4	3	TCCGTCTCCAAGAGTGGCGTGAGCA	7	-	252	1506
ENSDARG00000011704	ENSDART00000018478	23	5	4	CTCCTCCTCATAGCGGAAGATGTC	6	-	394	1506
ENSDARG00000011704	ENSDART00000018478	23	5	4	CACCTCCTCCTCATAGCGGAAGAT	6	-	397	1506
ENSDARG00000011704	ENSDART00000018478	23	5	4	ACCTCCTCCTCATAGCGGAAGAT	5	-	397	1506
ENSDARG00000011704	ENSDART00000018478	23	6	5	GGCGGCGGCTCATAGTAGGTGGT	5	-	532	1506
ENSDARG00000011704	ENSDART00000018478	23	7	6	CTCCTCTTCCTCAGGCTCTGCTTCT	7	-	687	1506
ENSDARG00000011704	ENSDART00000018478	23	8	7	AGCTCCAGCCGGAGGGAGATTCT	5	-	818	1506
ENSDARG00000011704	ENSDART00000018478	23	10	9	AAACTCGCCTTTAAAGCTGATGTA	6	-	1021	1506
ENSDARG00000011704	ENSDART00000018478	23	11	10	TCCAACAAACAGCTGATGACTGT	5	-	1094	1506
ENSDARG00000011704	ENSDART00000018478	23	12	11	TCCTCCGACGCCTTTGGTGTTGAT	6	-	1192	1506
ENSDARG00000011704	ENSDART00000018478	23	12	11	TCCGACGCCTTTGGTGTTGATTCT	6	-	1189	1506
ENSDARG00000011704	ENSDART00000018478	23	12	11	GTTTTCCTCCGACGCCTTTGGTGTT	7	-	1195	1506
ENSDARG00000011704	ENSDART00000018478	23	12	11	AAATCCAAAGTTGGGCAGTTTTC	5	-	1214	1506
ENSDARG00000011704	ENSDART00000018478	23	12	11	CACAAATCCAAAGTTGGGCAGTT	5	-	1217	1506
ENSDARG00000011704	ENSDART00000018478	23	13	12	TTATGCCTCTGGGCCCGCGGCGGGC	7	-	1375	1506
ENSDARG00000011704	ENSDART00000018478	23	13	12	GCCCGCGGCGGGCGTCTGGCGGC	5	-	1365	1506
ENSDARG00000011704	ENSDART00000018478	23	13	12	TCCCTCCTCTGGAGGCCGGCGGC	5	-	1437	1506
ENSDARG00000011704	ENSDART00000040923	23	4	3	TCCGTCTCCAAGAGTGGCGTGAGCA	7	-	252	1488
ENSDARG00000011704	ENSDART00000040923	23	5	4	ACCTCCTCCTCATAGCGGAAGAT	5	-	397	1488
ENSDARG00000011704	ENSDART00000040923	23	5	4	CTCCTCCTCATAGCGGAAGATGTC	6	-	394	1488
ENSDARG00000011704	ENSDART00000040923	23	5	4	CACCTCCTCCTCATAGCGGAAGAT	6	-	397	1488
ENSDARG00000011704	ENSDART00000040923	23	6	5	GGCGGCGGCTCATAGTAGGTGGT	5	-	532	1488
ENSDARG00000011704	ENSDART00000040923	23	7	6	CTCCTCTTCCTCAGGCTCTGCTTCT	7	-	687	1488
ENSDARG00000011704	ENSDART00000040923	23	8	7	AGCTCCAGCCGGAGGGAGATTCT	5	-	818	1488
ENSDARG00000011704	ENSDART00000040923	23	12	11	TCCAACAAACAGCTGATGACTGT	5	-	1076	1488
ENSDARG00000011704	ENSDART00000040923	23	13	12	CACAAATCCAAAGTTGGGCAGTT	5	-	1199	1488
ENSDARG00000011704	ENSDART00000040923	23	13	12	TCCTCCGACGCCTTTGGTGTTGAT	6	-	1174	1488
ENSDARG00000011704	ENSDART00000040923	23	13	12	AAATCCAAAGTTGGGCAGTTTTC	5	-	1196	1488
ENSDARG00000011704	ENSDART00000040923	23	13	12	TCCGACGCCTTTGGTGTTGATTCT	6	-	1171	1488
ENSDARG00000011704	ENSDART00000040923	23	13	12	GTTTTCCTCCGACGCCTTTGGTGTT	7	-	1177	1488
ENSDARG00000011704	ENSDART00000040923	23	14	13	TCCCTCCTCTGGAGGCCGGCGGC	5	-	1419	1488
ENSDARG00000011704	ENSDART00000040923	23	14	13	GCCCGCGGCGGGCGTCTGGCGGC	5	-	1347	1488
ENSDARG00000011704	ENSDART00000040923	23	14	13	TTATGCCTCTGGGCCCGCGGCGGGC	7	-	1357	1488
ENSDARG00000011704	ENSDART00000102011	23	3	3	TCCGTCTCCAAGAGTGGCGTGAGCA	7	-	252	1383
ENSDARG00000011704	ENSDART00000102011	23	4	4	CTCCTCCTCATAGCGGAAGATGTC	6	-	394	1383
ENSDARG00000011704	ENSDART00000102011	23	4	4	CACCTCCTCCTCATAGCGGAAGAT	6	-	397	1383
ENSDARG00000011704	ENSDART00000102011	23	4	4	ACCTCCTCCTCATAGCGGAAGAT	5	-	397	1383
ENSDARG00000011704	ENSDART00000102011	23	5	5	GGCGGCGGCTCATAGTAGGTGGT	5	-	532	1383
ENSDARG00000011704	ENSDART00000102011	23	6	6	CTCCTCTTCCTCAGGCTCTGCTTCT	7	-	687	1383
ENSDARG00000011704	ENSDART00000102011	23	7	7	AGCTCCAGCCGGAGGGAGATTCT	5	-	818	1383
ENSDARG00000011704	ENSDART00000102011	23	9	9	AAACTCGCCTTTAAAGCTGATGTA	6	-	1021	1383
ENSDARG00000011704	ENSDART00000102011	23	10	10	TCCAACAAACAGCTGATGACTGT	5	-	1094	1383
ENSDARG00000011704	ENSDART00000102011	23	11	11	AAATCCAAAGTTGGGCAGTTTTC	5	-	1214	1383
ENSDARG00000011704	ENSDART00000102011	23	11	11	GTTTTCCTCCGACGCCTTTGGTGTT	7	-	1195	1383
ENSDARG00000011704	ENSDART00000102011	23	11	11	TCCGACGCCTTTGGTGTTGATTCT	6	-	1189	1383
ENSDARG00000011704	ENSDART00000102011	23	11	11	CACAAATCCAAAGTTGGGCAGTT	5	-	1217	1383
ENSDARG00000011704	ENSDART00000102011	23	11	11	TCCTCCGACGCCTTTGGTGTTGAT	6	-	1192	1383
ENSDARG00000011704	ENSDART00000102011	23	13	13	GCCCGCGGCGGGCGTCTGGCGGC	5	-	1361	1383
ENSDARG00000011704	ENSDART00000102011	23	13	13	TTATGCCTCTGGGCCCGCGGCGGGC	7	-	1371	1383
ENSDARG00000011728	ENSDART00000054223	23	1	1	GACTCAAGCTGGCAGCAGCAGGA	5	+	91	1305
ENSDARG00000011728	ENSDART00000054223	23	1	1	GACTCAAACAGGCAGCAGCAGGA	5	+	406	1305
ENSDARG00000011728	ENSDART00000054223	23	1	1	GACTCAAACAGGCAGCAGCAGCA	5	+	271	1305
ENSDARG00000011728	ENSDART00000054223	23	1	1	AGAGTCTTCAGTACAGCAGTCGGG	6	+	248	1305
ENSDARG00000011728	ENSDART00000054223	23	1	1	GACTCAAACAGGCAGCAGCAGGA	5	+	226	1305
ENSDARG00000011728	ENSDART00000054223	23	1	1	AGAGTCCTCAGTACAGCAGTCGGG	6	+	473	1305
ENSDARG00000011728	ENSDART00000054223	23	1	1	AGAGTCCTCAGTACAGCAGTCGGG	6	+	428	1305
ENSDARG00000011728	ENSDART00000054223	23	1	1	AGAGTCCTCAGTACAGCAGTCGGG	6	+	338	1305
ENSDARG00000011728	ENSDART00000054223	23	1	1	AGAGTCCTCAGTACAGCAGACGGG	6	+	158	1305
ENSDARG00000011728	ENSDART00000054223	23	1	1	AGAGTCCTCAGTACAGCAGTCGGG	6	+	113	1305
ENSDARG00000011728	ENSDART00000054223	23	1	1	AGAGTCCTCAGTACAGCAGTCGGG	6	+	68	1305
ENSDARG00000011728	ENSDART00000054223	23	1	1	AGAGTCCTCAGTACAGCAGTCGGG	6	+	293	1305
ENSDARG00000011728	ENSDART00000054223	23	2	2	AGAGTCTTCAGTACAGCAGTCGGG	6	+	791	1305
ENSDARG00000011728	ENSDART00000054223	23	2	2	GACTCAAACAAGCAGCAGCAGGA	5	+	769	1305
ENSDARG00000011728	ENSDART00000054223	23	2	2	AGAGTCCTCAGTACAGCAGGCGGG	6	+	701	1305
ENSDARG00000011728	ENSDART00000054223	23	2	2	GACTCAAGCTGGCAGCAGCAGGA	5	+	814	1305
ENSDARG00000011728	ENSDART00000054223	23	2	2	GACTCAAGCTGGCAGCAGCAGGA	5	+	994	1305
ENSDARG00000011728	ENSDART00000054223	23	2	2	GACTCAAGCTGGCAGCAGCAGGA	5	+	859	1305
ENSDARG00000011728	ENSDART00000054223	23	2	2	AGAGTCCACAGTACAGTAGTCGGG	6	+	971	1305
ENSDARG00000011728	ENSDART00000054223	23	2	2	GACTCAAGCTGGCAGCAGCAGGA	5	+	679	1305
ENSDARG00000011728	ENSDART00000054223	23	2	2	GACTCAAACAGGCAGCAGCAGGA	5	+	544	1305
ENSDARG00000011728	ENSDART00000054223	23	2	2	AGAGTCCTCAGTACAGCAGTCGGG	6	+	566	1305
ENSDARG00000011728	ENSDART00000054223	23	2	2	AGAGTCCTCAGTACAGCAGTCGGG	6	+	881	1305
ENSDARG00000011728	ENSDART00000054223	23	2	2	AGAGTCCTCAGTACAGCAGTCGGG	6	+	611	1305
ENSDARG00000011728	ENSDART00000054223	23	2	2	AGAGTCCTCAGTACAGCAGTCGGG	6	+	926	1305
ENSDARG00000011728	ENSDART00000054223	23	2	2	AGAGTCCTCAGTACAGCAGTCGGG	6	+	836	1305
ENSDARG00000011728	ENSDART00000054223	23	2	2	AGAGTCCTCAGTACAGCAGTCGGG	6	+	521	1305
ENSDARG00000011728	ENSDART00000054223	23	2	2	AGAGTCCTCAGTACAGTAGTCGGG	6	+	656	1305
ENSDARG00000011728	ENSDART00000054223	23	3	3	GACTCAAGCTGGCAGCAGCAGGA	5	+	1174	1305
ENSDARG00000011728	ENSDART00000054223	23	3	3	GACTCAAGCTGGCAGCAGCAGGA	5	+	1219	1305
ENSDARG00000011728	ENSDART00000054223	23	3	3	AGAGTCCTCAGTACAGTAGTCGGG	6	+	1196	1305
ENSDARG00000011728	ENSDART00000054223	23	3	3	GACTCAAACAGGCAGCAGCAGGA	5	+	1039	1305
ENSDARG00000011728	ENSDART00000054223	23	3	3	AGAGTCCTCAGTACAGCAGTCGGG	6	+	1106	1305
ENSDARG00000011728	ENSDART00000054223	23	3	3	AGAGTCCTCAGTACAGCAGTCGGG	6	+	1061	1305
ENSDARG00000011728	ENSDART00000054223	23	3	3	AGAGTCCTCAGTACAGCAGTCGGG	6	+	1241	1305
ENSDARG00000011728	ENSDART00000054223	23	3	3	AGAGTCCTCAGTACAGTAGTCGGG	6	+	1151	1305
ENSDARG00000011809	ENSDART00000031616	23	1	1	GGCGGCAGAGCTCGGTGAAGTTTTG	7	-	94	1935
ENSDARG00000011809	ENSDART00000031616	23	1	1	CCCTCAAACAGAGCATGGCTGGGGT	7	-	35	1935
ENSDARG00000011809	ENSDART00000031616	23	3	3	TTCAGCAGAATCAACTGCAGCTGAC	7	-	485	1935
ENSDARG00000011809	ENSDART00000031616	23	3	3	AGAATCAACTGCAGCTGACGGATAC	7	-	479	1935
ENSDARG00000011809	ENSDART00000031616	23	4	4	ATCTGCAACTGGGTGGGACTTTGGA	7	-	606	1935
ENSDARG00000011809	ENSDART00000031616	23	4	4	AAAATCTGCAACTGGGTGGGACTTT	7	-	609	1935
ENSDARG00000011809	ENSDART00000031616	23	6	6	GTCATCACAAAATAGTGGGTGTC	5	-	874	1935
ENSDARG00000011809	ENSDART00000031616	23	7	7	GGCCACGTCCGCTTGGCCTTTGTG	6	-	1069	1935
ENSDARG00000011809	ENSDART00000031616	23	7	7	CCCACCAGCCCGATGAGCAGCCTCT	7	-	1157	1935
ENSDARG00000011809	ENSDART00000031616	23	7	7	CACGTCCGCTTGGCCTTTGTGGTT	6	-	1066	1935
ENSDARG00000011809	ENSDART00000031616	23	8	8	CCCAAAGGCCAAAAAGGCTGCAGAA	7	-	1190	1935
ENSDARG00000011921	ENSDART00000006419	23	1	1	GTTCCAGACTGACCGTGGTGAAGTT	7	+	71	867
ENSDARG00000011921	ENSDART00000006419	23	3	3	AAATCAAACAGCACGTGGAGAAC	5	+	314	867
ENSDARG00000011921	ENSDART00000006419	23	3	3	AAAATCAAACAGCACGTGGAGAAC	6	+	313	867
ENSDARG00000011921	ENSDART00000006419	23	6	6	TTAATCTTCCTCGTTCGATGGGTTT	7	+	602	867
ENSDARG00000011921	ENSDART00000006419	23	7	7	ACAAAAATCAACTATTTGACGTT	5	+	781	867
ENSDARG00000011921	ENSDART00000006419	23	7	7	CAAGTCAAACCAGGGAGACGAGGAG	7	+	753	867
ENSDARG00000011932	ENSDART00000005015	23	3	2	TTCTTCTTCTTTGTGGGACTGGGTG	7	-	122	3336
ENSDARG00000011932	ENSDART00000005015	23	4	3	AACATCAACAGGGTCTGTGGTGAG	6	-	226	3336
ENSDARG00000011932	ENSDART00000005015	23	4	3	TACAACATCAACAGGGTCTGTGGTG	7	-	228	3336
ENSDARG00000011932	ENSDART00000005015	23	10	9	GGCCCACACCAGAGGATGAGGCT	5	-	836	3336
ENSDARG00000011932	ENSDART00000005015	23	10	9	GCCCACACCAGAGGATGAGGCTGAG	7	-	833	3336
ENSDARG00000011932	ENSDART00000005015	23	10	9	CACACCAGAGGATGAGGCTGAGAC	6	-	831	3336
ENSDARG00000011932	ENSDART00000005015	23	11	10	CTCCAAGTCTGACCCGGTGTGAAC	6	-	1327	3336
ENSDARG00000011932	ENSDART00000005015	23	12	11	GTCTTCAGAGATGCAGGAGACGCT	6	-	1419	3336
ENSDARG00000011932	ENSDART00000005015	23	12	11	AAAGGCTTAGGGCTGCCGCTTGT	5	-	1441	3336
ENSDARG00000011932	ENSDART00000005015	23	12	11	AGCAAAGGCTTAGGGCTGCCGCT	5	-	1444	3336
ENSDARG00000011932	ENSDART00000005015	23	13	12	TGCTGCTGCTGTTGCTGTTGTTGTA	7	-	1574	3336
ENSDARG00000011932	ENSDART00000005015	23	13	12	TTATCCAAACTTCTGGTAGGTTTT	6	-	1632	3336
ENSDARG00000011932	ENSDART00000005015	23	14	13	GTCTTCTCCTTCTTGCTCTGTGGTT	7	-	1997	3336
ENSDARG00000011932	ENSDART00000005015	23	14	13	TTCTCCTTCTTGCTCTGTGGTTGAG	7	-	1994	3336
ENSDARG00000011932	ENSDART00000005015	23	14	13	TTCTTCTCCCTCCCGCCTTGTTC	5	-	2110	3336
ENSDARG00000011932	ENSDART00000005015	23	14	13	TGCTCCTCCAGTGGTTGATGAGTCT	7	-	1881	3336
ENSDARG00000011932	ENSDART00000005015	23	15	14	AGCAGCAGAGGAAGAGCTGCTTTG	6	-	2344	3336
ENSDARG00000011932	ENSDART00000005015	23	15	14	TTCTTCACAACACTGGCAGTGGAT	6	-	2388	3336
ENSDARG00000011932	ENSDART00000005015	23	15	14	GCAGGCCGCTGGGCAGGTTGCGTGC	7	-	2438	3336
ENSDARG00000011932	ENSDART00000005015	23	15	14	TGCTGCTGCTGCTGTTGTTGTTGGC	7	-	2584	3336
ENSDARG00000011932	ENSDART00000005015	23	15	14	TGCTGCGTCTTTTGGAGCAGGATTG	7	-	2271	3336
ENSDARG00000011932	ENSDART00000005015	23	16	15	GGCAGCGACATCAGCAGAGGCCGGA	7	-	2718	3336
ENSDARG00000011932	ENSDART00000005015	23	16	15	GACATCAGCAGAGGCCGGAGGGGTG	7	-	2712	3336
ENSDARG00000011932	ENSDART00000005015	23	16	15	AGCGACATCAGCAGAGGCCGGAGGG	7	-	2715	3336
ENSDARG00000011932	ENSDART00000005015	23	16	15	GTCGGCAGCGACATCAGCAGAGGCC	7	-	2721	3336
[truncated: 10,003 more rows]
