# Supplementary material for: Rapid Mutation of Endogenous Zebrafish Genes Using Zinc Finger Nucleases Made by Oligomerized Pool ENgineering (OPEN)
Source: PLoS One. 2009 Feb 9;4(2):e4348. doi: 10.1371/journal.pone.0004348 (PMC2634973; doi:10.1371/journal.pone.0004348)
Supplement: Table S24 — Potential OPEN ZFN target sites in gene transcripts encoded on zebrafish chromosome 24. Data presented as described in the legend to Table S1. (1.46 MB XLS) [file pone.0004348.s024.xls]

## Sheet: Chromosome24
Gene ID	Transcript ID	Chromosome Number	Exon Number	Coding Exon Number	TargetSite	ZFN Spacer Length	Strand	ZFN Cleavage Site	Coding Sequence Length
ENSDARG00000000069	ENSDART00000000070	24	3	3	AGAGACCACAACAGGCAGCTTTG	5	-	170	315
ENSDARG00000000069	ENSDART00000000070	24	3	3	GACCACAACAGGCAGCTTTGGTG	5	-	167	315
ENSDARG00000000069	ENSDART00000000070	24	3	3	GACCACAACAGGCAGCTTTGGTGGT	7	-	165	315
ENSDARG00000000069	ENSDART00000000070	24	4	4	GCAGGCAGCTTCTGTGCTGAAGGC	6	-	261	315
ENSDARG00000000069	ENSDART00000000070	24	4	4	GGCAGCAGCAGGGGTGAAGTCTTT	6	-	214	315
ENSDARG00000000830	ENSDART00000000915	24	1	1	ACAGACCCAGTGGAGCTGATGGT	5	-	310	2466
ENSDARG00000000830	ENSDART00000000915	24	2	2	GTCTCCGTCAGCTGAGGAGAGTCT	6	-	435	2466
ENSDARG00000000830	ENSDART00000000915	24	2	2	GACCACAACAACACCTGGAGACGAG	7	-	383	2466
ENSDARG00000000830	ENSDART00000000915	24	4	4	GTCTCAAACATCTGAGCTGCATAC	6	-	669	2466
ENSDARG00000000830	ENSDART00000000915	24	8	8	CTCCCAGCATGCACTGCAGCATCT	6	-	1139	2466
ENSDARG00000000830	ENSDART00000000915	24	12	12	TTCTGCCACTTGCAGACTGAGTT	5	-	1583	2466
ENSDARG00000000830	ENSDART00000000915	24	13	13	TTCTGCCGCAGCGAGAGGAAGAG	5	-	1699	2466
ENSDARG00000000830	ENSDART00000000915	24	14	14	CTCTGCCTCAAGCTGTAGTTGAG	5	-	1792	2466
ENSDARG00000000830	ENSDART00000000915	24	15	15	ATCTGCCGCCAGTGTGTGATGTC	5	-	1930	2466
ENSDARG00000000830	ENSDART00000000915	24	15	15	ACAATCTGCCGCCAGTGTGTGATGT	7	-	1931	2466
ENSDARG00000000830	ENSDART00000000915	24	16	16	GAAAAATCCAGCGACCGGAGCGTAA	7	-	2031	2466
ENSDARG00000000830	ENSDART00000000915	24	16	16	CTCCTAAACAGCGGGAAGAAGAA	5	-	2053	2466
ENSDARG00000000830	ENSDART00000000915	24	16	16	AGCTCCTAAACAGCGGGAAGAAGAA	7	-	2053	2466
ENSDARG00000000830	ENSDART00000000915	24	20	20	GCCAAACTCCTGCAGTCGGAGTC	5	-	2386	2466
ENSDARG00000000830	ENSDART00000000915	24	20	20	ACAGCCAAACTCCTGCAGTCGGA	5	-	2389	2466
ENSDARG00000001829	ENSDART00000024606	24	4	4	ACAGCCTCCAGTTTCTGCTGTCGTC	7	-	338	693
ENSDARG00000001829	ENSDART00000024606	24	4	4	CACAGCCTCCAGTTTCTGCTGTC	5	-	341	693
ENSDARG00000001829	ENSDART00000024606	24	5	5	GACTCACCCACTGCCTTTGCTGCT	6	-	491	693
ENSDARG00000001829	ENSDART00000024606	24	5	5	AGACTCACCCACTGCCTTTGCTGCT	7	-	491	693
ENSDARG00000001829	ENSDART00000024606	24	8	8	CAATTCCTCCTTCCACGCTGTCTGC	7	-	680	693
ENSDARG00000001909	ENSDART00000005701	24	2	2	AACAGCGACCATCTGCATTTTCT	5	-	77	2187
ENSDARG00000001909	ENSDART00000005701	24	9	9	GTCCAAGACTTGAAGAGCTGTTTAA	7	-	1028	2187
ENSDARG00000001909	ENSDART00000005701	24	11	11	TTCACCTGCCAGATGTAGAGGAT	5	-	1327	2187
ENSDARG00000001909	ENSDART00000005701	24	11	11	TTCTTCACCTGCCAGATGTAGAG	5	-	1330	2187
ENSDARG00000001909	ENSDART00000005701	24	12	12	GCCGTCACCTCATCCTGTGTGGCG	6	-	1353	2187
ENSDARG00000001909	ENSDART00000005701	24	12	12	TTATCCAAATTGACTGCCTGATAA	6	-	1383	2187
ENSDARG00000001909	ENSDART00000005701	24	13	13	AAAGACGTCATTGGTGTTGAGAG	5	-	1619	2187
ENSDARG00000001909	ENSDART00000005701	24	14	14	AGAGGCACCCAGAAAGCAGCTGGT	6	-	1773	2187
ENSDARG00000001909	ENSDART00000005701	24	15	15	ACACACCTCATCCCAGGTGTCGAG	6	-	1957	2187
ENSDARG00000001909	ENSDART00000005701	24	16	16	GTTGGCGGCTCGTAGCCTTGTTT	5	-	2098	2187
ENSDARG00000001909	ENSDART00000005701	24	16	16	GAACCAGCCGGTGAAGGTTGGCGGC	7	-	2112	2187
ENSDARG00000001909	ENSDART00000005701	24	16	16	CAATCCAGAGAAAAATCTGAGGGA	6	-	1967	2187
ENSDARG00000001909	ENSDART00000048940	24	3	3	AACAGCGACCATCTGCATTTTCT	5	-	92	2493
ENSDARG00000001909	ENSDART00000048940	24	11	11	GTCCAAGACTTGAAGAGCTGTTTAA	7	-	1052	2493
ENSDARG00000001909	ENSDART00000048940	24	13	13	TTCTTCACCTGCCAGATGTAGAG	5	-	1354	2493
ENSDARG00000001909	ENSDART00000048940	24	13	13	TTCACCTGCCAGATGTAGAGGAT	5	-	1351	2493
ENSDARG00000001909	ENSDART00000048940	24	14	14	TTATCCAAATTGACTGCCTGATAA	6	-	1407	2493
ENSDARG00000001909	ENSDART00000048940	24	14	14	GCCGTCACCTCATCCTGTGTGGCG	6	-	1377	2493
ENSDARG00000001909	ENSDART00000048940	24	15	15	AAAGACGTCATTGGTGTTGAGAG	5	-	1643	2493
ENSDARG00000001909	ENSDART00000048940	24	16	16	AGAGGCACCCAGAAAGCAGCTGGT	6	-	1797	2493
ENSDARG00000001909	ENSDART00000048940	24	17	17	ACACACCTCATCCCAGGTGTCGAG	6	-	1981	2493
ENSDARG00000001909	ENSDART00000048940	24	18	18	GTTGGCGGCTCGTAGCCTTGTTT	5	-	2122	2493
ENSDARG00000001909	ENSDART00000048940	24	18	18	CAATCCAGAGAAAAATCTGAGGGA	6	-	1991	2493
ENSDARG00000001909	ENSDART00000048940	24	18	18	GAACCAGCCGGTGAAGGTTGGCGGC	7	-	2136	2493
ENSDARG00000001909	ENSDART00000048940	24	20	20	GGCTTCTTATTCAAGTCTGTGTTG	6	-	2256	2493
ENSDARG00000001909	ENSDART00000106144	24	4	4	AACAGCGACCATCTGCATTTTCT	5	-	122	2196
ENSDARG00000001909	ENSDART00000106144	24	11	11	GTCCAAGACTTGAAGAGCTGTTTAA	7	-	1073	2196
ENSDARG00000001909	ENSDART00000106144	24	13	13	TTCTTCACCTGCCAGATGTAGAG	5	-	1375	2196
ENSDARG00000001909	ENSDART00000106144	24	13	13	TTCACCTGCCAGATGTAGAGGAT	5	-	1372	2196
ENSDARG00000001909	ENSDART00000106144	24	14	14	TTATCCAAATTGACTGCCTGATAA	6	-	1428	2196
ENSDARG00000001909	ENSDART00000106144	24	14	14	GCCGTCACCTCATCCTGTGTGGCG	6	-	1398	2196
ENSDARG00000001909	ENSDART00000106144	24	15	15	AAAGACGTCATTGGTGTTGAGAG	5	-	1664	2196
ENSDARG00000001909	ENSDART00000106144	24	16	16	AGAGGCACCCAGAAAGCAGCTGGT	6	-	1818	2196
ENSDARG00000001909	ENSDART00000106144	24	17	17	ACACACCTCATCCCAGGTGTCGAG	6	-	2002	2196
ENSDARG00000001909	ENSDART00000106144	24	18	18	GAACCAGCCGGTGAAGGTTGGCGGC	7	-	2157	2196
ENSDARG00000001909	ENSDART00000106144	24	18	18	GTTGGCGGCTCGTAGCCTTGTTT	5	-	2143	2196
ENSDARG00000001909	ENSDART00000106144	24	18	18	CAATCCAGAGAAAAATCTGAGGGA	6	-	2012	2196
ENSDARG00000001909	ENSDART00000106145	24	2	2	AACAGCGACCATCTGCATTTTCT	5	-	68	2427
ENSDARG00000001909	ENSDART00000106145	24	9	9	GTCCAAGACTTGAAGAGCTGTTTAA	7	-	1019	2427
ENSDARG00000001909	ENSDART00000106145	24	11	11	TTCTTCACCTGCCAGATGTAGAG	5	-	1321	2427
ENSDARG00000001909	ENSDART00000106145	24	11	11	TTCACCTGCCAGATGTAGAGGAT	5	-	1318	2427
ENSDARG00000001909	ENSDART00000106145	24	12	12	TTATCCAAATTGACTGCCTGATAA	6	-	1374	2427
ENSDARG00000001909	ENSDART00000106145	24	12	12	GCCGTCACCTCATCCTGTGTGGCG	6	-	1344	2427
ENSDARG00000001909	ENSDART00000106145	24	13	13	AAAGACGTCATTGGTGTTGAGAG	5	-	1610	2427
ENSDARG00000001909	ENSDART00000106145	24	14	14	AGAGGCACCCAGAAAGCAGCTGGT	6	-	1764	2427
ENSDARG00000001909	ENSDART00000106145	24	15	15	ACACACCTCATCCCAGGTGTCGAG	6	-	1948	2427
ENSDARG00000001909	ENSDART00000106145	24	16	16	GAACCAGCCGGTGAAGGTTGGCGGC	7	-	2103	2427
ENSDARG00000001909	ENSDART00000106145	24	16	16	GTTGGCGGCTCGTAGCCTTGTTT	5	-	2089	2427
ENSDARG00000001909	ENSDART00000106145	24	16	16	CAATCCAGAGAAAAATCTGAGGGA	6	-	1958	2427
ENSDARG00000001930	ENSDART00000005331	24	3	3	GGCTTCAAAGCCTTGTATGAGGA	5	+	217	1962
ENSDARG00000001930	ENSDART00000005331	24	3	3	GTTGACGGCAGCCGGCTTTGGTC	5	+	387	1962
ENSDARG00000001930	ENSDART00000005331	24	3	3	GTTCACGGCAGATATGCGGGAAC	5	+	336	1962
ENSDARG00000001930	ENSDART00000005331	24	3	3	GTTCAACTCACTGAAGCTGTAGAG	6	+	490	1962
ENSDARG00000001930	ENSDART00000005331	24	3	3	ATCTGCTTAGAGAACTGTGCCGAA	6	+	541	1962
ENSDARG00000001930	ENSDART00000005331	24	3	3	AGACACGACCGGAGACGCTGGAGAC	7	+	775	1962
ENSDARG00000001930	ENSDART00000005331	24	3	3	AACCTACGCTTTTGTTTGATGAC	5	+	820	1962
ENSDARG00000001930	ENSDART00000005331	24	3	3	AAAACCTACGCTTTTGTTTGATGAC	7	+	818	1962
ENSDARG00000001930	ENSDART00000005331	24	4	4	TTCACCGGCCTAAAGTGTGGTGGG	6	+	1061	1962
ENSDARG00000001930	ENSDART00000005331	24	4	4	TTCACCGGCCTAAAGTGTGGTGGGA	7	+	1061	1962
ENSDARG00000001930	ENSDART00000005331	24	4	4	GTTTTCGGCGGGGTTTGTGTGATAC	7	+	1633	1962
ENSDARG00000001930	ENSDART00000005331	24	4	4	TTCGCCTTCCTGTTGGGTGGTGAA	6	+	1141	1962
ENSDARG00000001930	ENSDART00000005331	24	4	4	TCCTCACCAACTGCTGGGAGAAC	5	+	1547	1962
ENSDARG00000001930	ENSDART00000005331	24	4	4	GCCAACTGCGACTAGAAGTAGAC	5	+	896	1962
ENSDARG00000001930	ENSDART00000005331	24	4	4	GCAGTCGGCGTTATTGGGAAGTA	5	+	1276	1962
ENSDARG00000001930	ENSDART00000005331	24	4	4	AACAACTTCGCCTTCCTGTTGGGTG	7	+	1135	1962
ENSDARG00000001930	ENSDART00000005331	24	4	4	AACTTCGCCTTCCTGTTGGGTGGTG	7	+	1138	1962
ENSDARG00000001930	ENSDART00000005331	24	4	4	ATCCTCACCAACTGCTGGGAGAAC	6	+	1546	1962
ENSDARG00000001930	ENSDART00000005331	24	4	4	CACCTCAAAGCAAGTCTGTGTTT	5	+	1473	1962
ENSDARG00000001930	ENSDART00000005331	24	4	4	CACCTCAAAGCAAGTCTGTGTTTTT	7	+	1473	1962
ENSDARG00000001930	ENSDART00000005331	24	4	4	CTCAAAGCAAGTCTGTGTTTTTG	5	+	1476	1962
ENSDARG00000001930	ENSDART00000005331	24	4	4	CTCAAAGCAAGTCTGTGTTTTTGAC	7	+	1476	1962
ENSDARG00000001930	ENSDART00000005331	24	4	4	GAACTAGGCCCTGACGGAGAGTTT	6	+	1165	1962
ENSDARG00000001930	ENSDART00000106054	24	1	1	ATCTGCTTAGAGAACTGTGCCGAA	6	+	355	1722
ENSDARG00000001930	ENSDART00000106054	24	1	1	GTTCACGGCAGATATGCGGGAAC	5	+	150	1722
ENSDARG00000001930	ENSDART00000106054	24	1	1	AGACACGACCGGAGACGCTGGAGAC	7	+	589	1722
ENSDARG00000001930	ENSDART00000106054	24	1	1	GTTCAACTCACTGAAGCTGTAGAG	6	+	304	1722
ENSDARG00000001930	ENSDART00000106054	24	1	1	AACCTACGCTTTTGTTTGATGAC	5	+	634	1722
ENSDARG00000001930	ENSDART00000106054	24	1	1	GGCTTCAAAGCCTTGTATGAGGA	5	+	31	1722
ENSDARG00000001930	ENSDART00000106054	24	1	1	AAAACCTACGCTTTTGTTTGATGAC	7	+	632	1722
ENSDARG00000001930	ENSDART00000106054	24	1	1	GTTGACGGCAGCCGGCTTTGGTC	5	+	201	1722
ENSDARG00000001930	ENSDART00000106054	24	4	4	TTCACCGGCCTAAAGTGTGGTGGG	6	+	881	1722
ENSDARG00000001930	ENSDART00000106054	24	4	4	TTCACCGGCCTAAAGTGTGGTGGGA	7	+	881	1722
ENSDARG00000001930	ENSDART00000106054	24	4	4	TTCGCCTTCCTGTTGGGTGGTGAA	6	+	961	1722
ENSDARG00000001930	ENSDART00000106054	24	4	4	GCAGTCGGCGTTATTGGGAAGTA	5	+	1096	1722
ENSDARG00000001930	ENSDART00000106054	24	4	4	GAACTAGGCCCTGACGGAGAGTTT	6	+	985	1722
ENSDARG00000001930	ENSDART00000106054	24	4	4	AACAACTTCGCCTTCCTGTTGGGTG	7	+	955	1722
ENSDARG00000001930	ENSDART00000106054	24	4	4	AACTTCGCCTTCCTGTTGGGTGGTG	7	+	958	1722
ENSDARG00000001930	ENSDART00000106054	24	4	4	CACCTCAAAGCAAGTCTGTGTTT	5	+	1293	1722
ENSDARG00000001930	ENSDART00000106054	24	4	4	CACCTCAAAGCAAGTCTGTGTTTTT	7	+	1293	1722
ENSDARG00000001930	ENSDART00000106054	24	4	4	CTCAAAGCAAGTCTGTGTTTTTG	5	+	1296	1722
ENSDARG00000001930	ENSDART00000106054	24	4	4	CTCAAAGCAAGTCTGTGTTTTTGAC	7	+	1296	1722
ENSDARG00000001930	ENSDART00000106054	24	5	5	GTTTTCGGCGGGGTTTGTGTGATAC	7	+	1408	1722
ENSDARG00000001930	ENSDART00000106054	24	5	5	TCCTCACCAACTGCTGGGAGAAC	5	+	1322	1722
ENSDARG00000001930	ENSDART00000106054	24	5	5	ATCCTCACCAACTGCTGGGAGAAC	6	+	1321	1722
ENSDARG00000002165	ENSDART00000005105	24	7	7	GTACCCAGAATTGAAGATGGGAAC	6	+	415	744
ENSDARG00000002165	ENSDART00000005105	24	8	8	ACCCGCACCAAGATCGAAGGATTC	6	+	487	744
ENSDARG00000002165	ENSDART00000005105	24	10	10	TTACGCATCATAGTTCTGGAGAT	5	+	634	744
ENSDARG00000002255	ENSDART00000022349	24	1	1	TTCTTCACAGGTGTGCTGTGGGC	5	-	109	2478
ENSDARG00000002255	ENSDART00000022349	24	1	1	TCCTTCTTCACAGGTGTGCTGTG	5	-	112	2478
ENSDARG00000002255	ENSDART00000022349	24	1	1	GGCGGCGGCAGGAGGAAGCTGGT	5	-	89	2478
ENSDARG00000002255	ENSDART00000022349	24	7	7	TTCTCCACATCGCGGAAGGTGAT	5	-	409	2478
ENSDARG00000002255	ENSDART00000022349	24	7	7	CTCCACATCGCGGAAGGTGATGCC	6	-	406	2478
ENSDARG00000002255	ENSDART00000022349	24	8	8	CACGTCACCTCGGATCTGCTTCT	5	-	467	2478
ENSDARG00000002255	ENSDART00000022349	24	9	9	AGCAGCGCCGGCTCTGGAGGGTAA	6	-	516	2478
ENSDARG00000002255	ENSDART00000022349	24	9	9	GTCTTCAGACAGCAGCGCCGGCTCT	7	-	525	2478
ENSDARG00000002255	ENSDART00000022349	24	9	9	GACAGCAGCGCCGGCTCTGGAGGG	6	-	519	2478
ENSDARG00000002255	ENSDART00000022349	24	17	17	ACCTTCCACAGTCTCTTTGCCGCT	6	-	1065	2478
ENSDARG00000002255	ENSDART00000022349	24	18	18	GCCTGCGTCCGGCCGCTGTAGCG	5	-	1171	2478
ENSDARG00000002255	ENSDART00000022349	24	19	19	ACCGTCTGCGTCTGCGTGTGTGTGT	7	-	1454	2478
ENSDARG00000002255	ENSDART00000022349	24	19	19	TCCACCAGCACCGTCTGCGTCTGC	6	-	1464	2478
ENSDARG00000002255	ENSDART00000022349	24	19	19	ACCAGCACCGTCTGCGTCTGCGTGT	7	-	1460	2478
ENSDARG00000002255	ENSDART00000022349	24	19	19	GGCTGCATCTGCTTGTCTGCATGT	6	-	1404	2478
ENSDARG00000002255	ENSDART00000022349	24	19	19	TCCTCCACCTTCTTCTCTGGGGTC	6	-	1356	2478
ENSDARG00000002255	ENSDART00000022349	24	19	19	AGCACCGTCTGCGTCTGCGTGTGT	6	-	1458	2478
ENSDARG00000002255	ENSDART00000022349	24	19	19	TTCTCCACCAGCACCGTCTGCGTCT	7	-	1466	2478
ENSDARG00000002255	ENSDART00000022349	24	19	19	CTCCTCCACCTTCTTCTCTGGGGTC	7	-	1356	2478
ENSDARG00000002255	ENSDART00000022349	24	19	19	TCCGTCTGCGGCTGCATCTGCTTGT	7	-	1412	2478
ENSDARG00000002255	ENSDART00000022349	24	22	22	TCCCGCCGCGGCGAGCGCAGCGGGG	7	-	1793	2478
ENSDARG00000002255	ENSDART00000022349	24	24	24	AGACGCAGATGGAGACGCAGATGCA	7	-	2031	2478
ENSDARG00000002255	ENSDART00000022349	24	24	24	GCAGACGCAGATGGAGACGCAGAT	6	-	2034	2478
ENSDARG00000002255	ENSDART00000022349	24	24	24	AGATGCAGACGCAGATGGAGACGCA	7	-	2037	2478
ENSDARG00000002255	ENSDART00000022349	24	25	25	TGCTCATCCACACTCTCTGATGGC	6	-	2109	2478
ENSDARG00000002255	ENSDART00000022349	24	25	25	CTCATCCACACTCTCTGATGGCTGT	7	-	2106	2478
ENSDARG00000002255	ENSDART00000022349	24	31	31	CACCTCGTCATGATCGATGTCTGC	6	-	2464	2478
ENSDARG00000002396	ENSDART00000035992	24	5	5	ACCCTCCTCCAGTCCAGAAGGGGGG	7	-	564	1563
ENSDARG00000002396	ENSDART00000035992	24	5	5	CCCTCCTCCAGTCCAGAAGGGGGG	6	-	564	1563
ENSDARG00000002396	ENSDART00000035992	24	8	8	TTACTCACCAGTAGGTGCTTTGGTT	7	-	859	1563
ENSDARG00000002396	ENSDART00000035992	24	8	8	TTACTCACCAGTAGGTGCTTTGGT	6	-	860	1563
ENSDARG00000002396	ENSDART00000035992	24	8	8	TACTCACCAGTAGGTGCTTTGGTT	6	-	859	1563
ENSDARG00000002396	ENSDART00000035992	24	8	8	TACTCACCAGTAGGTGCTTTGGT	5	-	860	1563
ENSDARG00000002396	ENSDART00000035992	24	13	13	GTCGACTCCACTCGGGTGCGGTGAT	7	-	1429	1563
ENSDARG00000002396	ENSDART00000035992	24	13	13	GTCGACTCCACTCGGGTGCGGTG	5	-	1431	1563
ENSDARG00000002396	ENSDART00000035992	24	14	14	CAATGCCTCTGTCTTTGTGTTGTC	6	-	1520	1563
ENSDARG00000002396	ENSDART00000035992	24	14	14	CAATGCCTCTGTCTTTGTGTTGTCT	7	-	1519	1563
ENSDARG00000002779	ENSDART00000014696	24	1	1	ACCATCTCCCATTTCCGTGGATGAA	7	+	365	780
ENSDARG00000002779	ENSDART00000014696	24	1	1	AGAGACACCCCAACGAAGACTAC	5	+	113	780
ENSDARG00000002779	ENSDART00000014696	24	2	2	AGAGACACATCAAGATCTGGTTTC	6	+	584	780
ENSDARG00000003051	ENSDART00000017686	24	2	1	AGCACCGGCAAAATGAGGAGCGGAA	7	-	63	807
ENSDARG00000003051	ENSDART00000017686	24	2	1	AGACTCTGCCCGAATAGTGGGAGCA	7	-	33	807
ENSDARG00000003051	ENSDART00000017686	24	6	5	CTCACCCCATCCAGTGACGTATTC	6	-	602	807
ENSDARG00000003051	ENSDART00000092448	24	1	1	AGACTCTGCCCGAATAGTGGGAGCA	7	-	33	810
ENSDARG00000003051	ENSDART00000092448	24	1	1	AGCACCGGCAAAATGAGGAGCGGAA	7	-	63	810
ENSDARG00000003051	ENSDART00000092448	24	5	5	CTCACCCCATCCAGTGACGTATTC	6	-	605	810
ENSDARG00000003391	ENSDART00000045724	24	3	3	ACATTCCTCTCCGCTGTGTCAAC	5	-	412	516
ENSDARG00000003462	ENSDART00000025134	24	2	2	GAACGCCGCTGCTGTGGCCGTCGAC	7	-	102	1227
ENSDARG00000003462	ENSDART00000025134	24	2	2	CGCCGCTGCTGTGGCCGTCGACTGT	7	-	99	1227
ENSDARG00000003462	ENSDART00000025134	24	3	3	AGCATCAGAATGCCTGTTTTGGGTT	7	-	164	1227
ENSDARG00000003462	ENSDART00000025134	24	3	3	AGCATCAGAATGCCTGTTTTGGGT	6	-	165	1227
ENSDARG00000003462	ENSDART00000025134	24	3	3	AGCATCAGAATGCCTGTTTTGGG	5	-	166	1227
ENSDARG00000003462	ENSDART00000025134	24	5	5	GGCCTCCTCCGTCAGCGGATGAA	5	-	464	1227
ENSDARG00000003462	ENSDART00000025134	24	6	6	TCCAGCGCATCTTCGGTCTGTCGGC	7	-	607	1227
ENSDARG00000003462	ENSDART00000025134	24	6	6	GTTCACCTCTATCAGCAGCGGGT	5	-	656	1227
ENSDARG00000003462	ENSDART00000025134	24	6	6	CGCATCTTCGGTCTGTCGGCGCG	5	-	604	1227
ENSDARG00000003462	ENSDART00000025134	24	7	7	AGAGGCAGAGAGTGCGCAGAGAAC	6	-	744	1227
ENSDARG00000003462	ENSDART00000025134	24	9	9	CTCTTCTCCGAGGACCTGTGAGTAC	7	-	1020	1227
ENSDARG00000003462	ENSDART00000025134	24	9	9	TGCAGCGTCTCGATGTGGTCGCT	5	-	982	1227
ENSDARG00000003462	ENSDART00000025134	24	10	10	AGATTCTGCTCTTCTGATGTTTTC	6	-	1054	1227
ENSDARG00000003462	ENSDART00000025134	24	11	11	GACAGCGCAGGGTCAGCTGACGAG	6	-	1154	1227
ENSDARG00000003462	ENSDART00000105737	24	2	2	GAACGCCGCTGCTGTGGCCGTCGAC	7	-	102	1230
ENSDARG00000003462	ENSDART00000105737	24	2	2	CGCCGCTGCTGTGGCCGTCGACTGT	7	-	99	1230
ENSDARG00000003462	ENSDART00000105737	24	3	3	AGCATCAGAATGCCTGTTTTGGG	5	-	166	1230
ENSDARG00000003462	ENSDART00000105737	24	3	3	AGCATCAGAATGCCTGTTTTGGGT	6	-	165	1230
ENSDARG00000003462	ENSDART00000105737	24	3	3	AGCATCAGAATGCCTGTTTTGGGTT	7	-	164	1230
ENSDARG00000003462	ENSDART00000105737	24	5	5	GGCCTCCTCCGTCAGCGGATGAA	5	-	464	1230
ENSDARG00000003462	ENSDART00000105737	24	6	6	TCCAGCGCATCTTCGGTCTGTCGGC	7	-	607	1230
ENSDARG00000003462	ENSDART00000105737	24	6	6	CGCATCTTCGGTCTGTCGGCGCG	5	-	604	1230
ENSDARG00000003462	ENSDART00000105737	24	6	6	GTTCACCTCTATCAGCAGCGGGT	5	-	656	1230
ENSDARG00000003462	ENSDART00000105737	24	7	7	AGAGGCAGAGAGTGCGCAGAGAAC	6	-	744	1230
ENSDARG00000003462	ENSDART00000105737	24	9	9	CTCTTCTCCGAGGACCTGTGAGTAC	7	-	1020	1230
ENSDARG00000003462	ENSDART00000105737	24	9	9	TGCAGCGTCTCGATGTGGTCGCT	5	-	982	1230
ENSDARG00000003462	ENSDART00000105737	24	11	11	AGATTCTGCTCTTCTGATGTTTTC	6	-	1057	1230
ENSDARG00000003462	ENSDART00000105737	24	12	12	GACAGCGCAGGGTCAGCTGACGAG	6	-	1157	1230
ENSDARG00000003776	ENSDART00000014787	24	1	1	TTAATCTTCGAGTAGGCTTTGAA	5	-	61	1071
ENSDARG00000003776	ENSDART00000014787	24	1	1	TCCACCTTAATCTTCGAGTAGGCT	6	-	66	1071
ENSDARG00000003776	ENSDART00000014787	24	4	4	GTCTCCATCTACAGTGAGGCGGTA	6	-	409	1071
ENSDARG00000003776	ENSDART00000014787	24	6	6	TACCTCCACATCCTTTTGAAGCT	5	-	638	1071
ENSDARG00000003776	ENSDART00000014787	24	7	7	GAAATCTCCCGGCGAGAGTGGTTT	6	-	835	1071
ENSDARG00000003776	ENSDART00000014787	24	7	7	ATCAACTTCAACAAGGCTAGGAA	5	-	658	1071
ENSDARG00000003899	ENSDART00000010126	24	3	2	CTCAAAACCCAGACTCTGTGTCT	5	+	164	1275
ENSDARG00000003899	ENSDART00000010126	24	3	2	CACTCCGCCTGATGTAGATGGGGTA	7	+	615	1275
ENSDARG00000003899	ENSDART00000010126	24	3	2	GCACTCCGCCTGATGTAGATGGG	5	+	614	1275
ENSDARG00000003899	ENSDART00000010126	24	3	2	GCCTCAAAACCCAGACTCTGTGTCT	7	+	162	1275
ENSDARG00000003899	ENSDART00000010126	24	3	2	AGCTTCAGCTGGCTGTGGTGACGGC	7	+	488	1275
ENSDARG00000003899	ENSDART00000010126	24	3	2	ACCAAAAGAGGGCCAGGTTTGGTC	6	+	547	1275
ENSDARG00000003899	ENSDART00000010126	24	4	3	ATCACCGCACTTTCCTTCTGACGCT	7	+	872	1275
ENSDARG00000003899	ENSDART00000010126	24	4	3	CTCTTCTACTGTCCCGATGTCTAC	6	+	979	1275
ENSDARG00000003899	ENSDART00000010126	24	4	3	CTCTTCTTCCTGCTGACGTCGAT	5	+	898	1275
ENSDARG00000003899	ENSDART00000010126	24	5	4	GCACAAAACAGAAGATTTGGTGTA	6	+	1263	1275
ENSDARG00000003899	ENSDART00000010126	24	5	4	CACAAAACAGAAGATTTGGTGTA	5	+	1264	1275
ENSDARG00000003899	ENSDART00000010126	24	5	4	CAAAACAGAAGATTTGGTGTAGAA	6	+	1266	1275
ENSDARG00000003941	ENSDART00000017147	24	1	1	TTCGTCGACTCTCTCTGTGGGTAG	6	-	244	1038
ENSDARG00000003941	ENSDART00000017147	24	1	1	GGCAGCTTCTCCTGGAATTTGCC	5	-	703	1038
ENSDARG00000003941	ENSDART00000017147	24	1	1	GCCAGCTCCGCTTTGGTCTGCTGGG	7	-	638	1038
ENSDARG00000003941	ENSDART00000017147	24	1	1	GAAGTCCCCAATAAGAGGCTGGA	5	-	767	1038
ENSDARG00000003941	ENSDART00000017147	24	1	1	CACTTCGTCGACTCTCTCTGTGGGT	7	-	246	1038
ENSDARG00000003941	ENSDART00000017147	24	1	1	ACCTCAATCAACCACTCTTTGGTG	6	-	465	1038
ENSDARG00000003941	ENSDART00000017147	24	1	1	ACAGTCCTCCCGTTTGTTGCCTTT	6	-	166	1038
ENSDARG00000004131	ENSDART00000006930	24	2	2	TGCTCATACCGTTGGCTAAGACTTT	7	-	346	606
ENSDARG00000004131	ENSDART00000006930	24	2	2	GTTGGCTAAGACTTTGGGCTTGT	5	-	338	606
ENSDARG00000004131	ENSDART00000006930	24	2	2	AGAAGCAGATGTTGTGGAGGATGAG	7	-	304	606
ENSDARG00000004131	ENSDART00000006930	24	3	3	CAACAAAGCCCAAAGTGCAGAAGCT	7	-	426	606
ENSDARG00000004131	ENSDART00000006930	24	3	3	AACAAAGCCCAAAGTGCAGAAGCT	6	-	426	606
ENSDARG00000004131	ENSDART00000006930	24	4	4	CACTTCAAAGTGGCTTTTGCCTGT	6	-	462	606
ENSDARG00000004131	ENSDART00000006930	24	4	4	CTCTTCAACTTTCAGTCTGATGGA	6	-	490	606
ENSDARG00000004274	ENSDART00000066583	24	4	3	TCCGGCCGCGTCTGCAGCAGCTGAT	7	+	242	714
ENSDARG00000004274	ENSDART00000066583	24	5	4	ACCTCCAGAAAATGCTGTGGAAAAC	7	+	503	714
ENSDARG00000004274	ENSDART00000066583	24	6	5	CTCCTCACCGGGTGGAGCAGTGTTT	7	+	566	714
ENSDARG00000004312	ENSDART00000019076	24	2	2	GACCACTAACCTGAAGCTGAGGAA	6	+	87	294
ENSDARG00000004312	ENSDART00000075144	24	2	2	GACCACTAACCTGAAGCTGAGGAA	6	+	87	324
ENSDARG00000004647	ENSDART00000012653	24	6	6	AGAAGCTCCAGACTAGACTGGTTT	6	-	633	1887
ENSDARG00000004647	ENSDART00000012653	24	6	6	TGCTCAAGCATGCTCTGCAGAAGCT	7	-	650	1887
ENSDARG00000004647	ENSDART00000012653	24	8	8	GTTAACAGCATTTAGTCGCTGTT	5	-	980	1887
ENSDARG00000004647	ENSDART00000012653	24	10	10	GCACACAGAGCTGGTTGTGGAGAAC	7	-	1458	1887
ENSDARG00000004647	ENSDART00000012653	24	10	10	GCACACAGAGCTGGTTGTGGAGAA	6	-	1459	1887
ENSDARG00000004647	ENSDART00000012653	24	10	10	TCCAGCAAATGAGCGGGTCGTGGTA	7	-	1298	1887
ENSDARG00000004647	ENSDART00000012653	24	10	10	TGCAGCACAGGAGCCGCTGTTGAG	6	-	1210	1887
ENSDARG00000004647	ENSDART00000012653	24	10	10	CTAACCTGCAGTGTTTGCTGTAGCT	7	-	1505	1887
ENSDARG00000004647	ENSDART00000012653	24	11	11	TGCTCAATCAGCTCTAGCAGTTTAG	7	-	1607	1887
ENSDARG00000004687	ENSDART00000007997	24	1	1	AACGTCAAACAGACGTATGGGAC	5	+	42	1260
ENSDARG00000004687	ENSDART00000007997	24	2	2	CACTACCCCTGATGAGCTGCTTAG	6	+	165	1260
ENSDARG00000004687	ENSDART00000007997	24	2	2	CAAGCCCTCTTTACTAGGAGATGTG	7	+	225	1260
ENSDARG00000004687	ENSDART00000007997	24	2	2	AGCTGCTTAGTGCTGTGATGAGTGC	7	+	179	1260
ENSDARG00000004687	ENSDART00000007997	24	2	2	ACACTACCCCTGATGAGCTGCTTAG	7	+	164	1260
ENSDARG00000004687	ENSDART00000007997	24	3	3	TTCTACAACCTGGGGCAGGTGCA	5	+	263	1260
ENSDARG00000004687	ENSDART00000007997	24	7	7	AACCTCAGAGAATGTTGCTGAGAG	6	+	540	1260
ENSDARG00000004687	ENSDART00000007997	24	8	8	ACCGGCAGCACCACAGCTGGTGCG	6	+	790	1260
ENSDARG00000004687	ENSDART00000007997	24	9	9	GAAGCCCTCAAACTGGCTGGTGAG	6	+	970	1260
ENSDARG00000004687	ENSDART00000007997	24	9	9	GCCCTCAAACTGGCTGGTGAGAG	5	+	973	1260
ENSDARG00000004687	ENSDART00000007997	24	11	11	TTCCTAGGCTGTGTATTGTGTGGAA	7	+	1038	1260
ENSDARG00000004687	ENSDART00000007997	24	11	11	CTCAAACGCAGACGGAAGAGGTA	5	+	1171	1260
ENSDARG00000004687	ENSDART00000007997	24	11	11	AGCTCAAACGCAGACGGAAGAGGTA	7	+	1169	1260
ENSDARG00000004922	ENSDART00000005954	24	2	2	TTCCTCATCGGCCATCTGCAAAC	5	+	127	1164
ENSDARG00000004922	ENSDART00000005954	24	2	2	GCCATCTGCAAACCAAGCAGGAGAG	7	+	137	1164
ENSDARG00000004922	ENSDART00000005954	24	3	3	TTCCCCACCGTCTCCGGAGTCTAA	6	+	327	1164
ENSDARG00000004922	ENSDART00000005954	24	4	4	CAAACCAGAGAGTCGAGACTTTGAT	7	+	396	1164
ENSDARG00000004922	ENSDART00000005954	24	4	4	AGCTCAATCACATACTGCTGGAGAG	7	+	422	1164
ENSDARG00000004922	ENSDART00000005954	24	5	5	TTAGACCCCCTGGCGGCTGAGAT	5	+	583	1164
ENSDARG00000004922	ENSDART00000005954	24	5	5	CTCTTCAAACATTGGCGTCTTTTTG	7	+	481	1164
ENSDARG00000004922	ENSDART00000005954	24	6	6	GGCTCCATCGGTCACTGAAGATGAG	7	+	783	1164
ENSDARG00000004922	ENSDART00000005954	24	7	7	GGCGTCACCGGCCTGTTGCAGTC	5	+	868	1164
ENSDARG00000005139	ENSDART00000007796	24	1	1	CTCTACATCTATAATGTGGTGCT	5	+	43	1611
ENSDARG00000005139	ENSDART00000007796	24	1	1	GGCTGCTAAATATATATTTGATGTG	7	+	84	1611
ENSDARG00000005139	ENSDART00000007796	24	2	2	TACTCAGGCAGAAAAATGGTGAGAA	7	+	166	1611
ENSDARG00000005139	ENSDART00000007796	24	5	5	TTCACCATCATGCGCTGTATGAGTT	7	+	553	1611
ENSDARG00000005139	ENSDART00000007796	24	6	6	CTCAAACACATCTCTGACTGGGCT	6	+	847	1611
ENSDARG00000005139	ENSDART00000007796	24	6	6	AACCCAAACCTGACGAGGAAGGA	5	+	709	1611
ENSDARG00000005139	ENSDART00000007796	24	7	7	GAAAGCGGCTGTGATGTTTGGAG	5	+	912	1611
ENSDARG00000005139	ENSDART00000007796	24	7	7	GAAAGCGGCTGTGATGTTTGGAGTG	7	+	912	1611
ENSDARG00000005139	ENSDART00000007796	24	9	9	TTAAACTGCTTTGGTTTGAATTT	5	+	1183	1611
ENSDARG00000005139	ENSDART00000007796	24	10	10	GCCCTCAACAGTCTTGAATTTGCC	6	+	1345	1611
ENSDARG00000005139	ENSDART00000007796	24	10	10	CCCTCAACAGTCTTGAATTTGCC	5	+	1346	1611
ENSDARG00000005139	ENSDART00000007796	24	10	10	ACATTCAACTTTTGGACGATTGT	5	+	1306	1611
ENSDARG00000005139	ENSDART00000007796	24	11	11	ACCACCATCACTGTGATGTTTGT	5	+	1411	1611
ENSDARG00000005139	ENSDART00000007796	24	11	11	TTCACCACCATCACTGTGATGTT	5	+	1408	1611
ENSDARG00000005148	ENSDART00000087083	24	1	1	AGCCTAAAAAGATACGGAGGAGAT	6	+	172	1452
ENSDARG00000005148	ENSDART00000087083	24	1	1	GTTCAATTCAAAGCTGAAGGTGTG	6	+	213	1452
ENSDARG00000005148	ENSDART00000087083	24	2	2	TGCTGCTGCGAGTATAAGGATTT	5	+	502	1452
ENSDARG00000005148	ENSDART00000087083	24	2	2	GTAACCTTAAGTGGGGCGCAGAT	5	+	458	1452
ENSDARG00000005148	ENSDART00000087083	24	2	2	CTCTTCTTCTGCCCTGGGAAGGT	5	+	284	1452
ENSDARG00000005148	ENSDART00000087083	24	4	4	GACAACACCAGTACCTGCAGGTTTC	7	+	744	1452
ENSDARG00000005148	ENSDART00000087083	24	4	4	AGATGCAGACCTGGTCTGACAAC	5	+	727	1452
ENSDARG00000005148	ENSDART00000087083	24	4	4	TTAGGCACATTGGAGAGATGCAGAC	7	+	712	1452
ENSDARG00000005148	ENSDART00000087083	24	5	5	GCCAAAATCCGTCAGTCTGTCGTT	6	+	1171	1452
ENSDARG00000005148	ENSDART00000087083	24	5	5	CTCGTCATCATCAAGTCTGGAAAC	6	+	1222	1452
ENSDARG00000005332	ENSDART00000002953	24	1	1	ATCGCCTAATAATCAGCTTAGGTC	6	+	17	1353
ENSDARG00000005332	ENSDART00000002953	24	4	4	AACTACTTAACAGCAGTGGCCAAC	6	+	379	1353
ENSDARG00000005332	ENSDART00000002953	24	4	4	CTCAACTACTTAACAGCAGTGGCC	6	+	376	1353
ENSDARG00000005332	ENSDART00000002953	24	5	5	CTATCCACCTGATTGGTGTGAGCC	6	+	473	1353
ENSDARG00000005332	ENSDART00000002953	24	6	6	TGCTGCACACAGATATGAATTGTAA	7	+	641	1353
ENSDARG00000005332	ENSDART00000002953	24	8	8	CTCAGCGGCCAGTGTTTGCAGTG	5	+	862	1353
ENSDARG00000005332	ENSDART00000002953	24	8	8	TTCCTCAGCGGCCAGTGTTTGCA	5	+	859	1353
ENSDARG00000005872	ENSDART00000007097	24	1	1	AGACACACATTGCTCTGGAGACGCA	7	-	66	1818
ENSDARG00000005872	ENSDART00000007097	24	2	2	TTCTTCACCATGGCGGCCTGAGAG	6	-	294	1818
ENSDARG00000005872	ENSDART00000007097	24	2	2	AGAGCCTCCGTCGGGCCGTCGCC	5	-	253	1818
ENSDARG00000005872	ENSDART00000007097	24	3	3	TTCGACTGCGGGGGTTTGGGGGA	5	-	448	1818
ENSDARG00000005872	ENSDART00000007097	24	7	7	TCCAGCTTAGCCAACAGCTGAAAAC	7	-	905	1818
ENSDARG00000005872	ENSDART00000007097	24	8	8	AGCCGCAGCGTCGTTCTGGTGCA	5	-	1049	1818
ENSDARG00000005872	ENSDART00000007097	24	8	8	TCCAGCTCCTGACGCAGTTGCTGTC	7	-	986	1818
ENSDARG00000005872	ENSDART00000007097	24	8	8	AACATCTTCAGCAAAGCCGCAGCG	6	-	1062	1818
ENSDARG00000005872	ENSDART00000007097	24	8	8	AAAGCCGCAGCGTCGTTCTGGTGCA	7	-	1049	1818
ENSDARG00000005872	ENSDART00000007097	24	10	10	CACCTCCTCCTGTTTGGCGTTTTTC	7	-	1341	1818
ENSDARG00000005872	ENSDART00000007097	24	10	10	CTCTTCACCTCCTCCTGTTTGGCG	6	-	1347	1818
ENSDARG00000005872	ENSDART00000007097	24	10	10	GTTCCACACATTCATGCGGTTCT	5	-	1277	1818
ENSDARG00000005872	ENSDART00000007097	24	10	10	CACCTCCTCCTGTTTGGCGTTTTT	6	-	1342	1818
ENSDARG00000005872	ENSDART00000007097	24	10	10	ACCTCCTCCTGTTTGGCGTTTTTC	6	-	1341	1818
ENSDARG00000005872	ENSDART00000007097	24	10	10	ACCTCCTCCTGTTTGGCGTTTTT	5	-	1342	1818
ENSDARG00000005872	ENSDART00000007097	24	10	10	TTCACCTCCTCCTGTTTGGCGTT	5	-	1345	1818
ENSDARG00000005872	ENSDART00000007097	24	12	12	AGCGGCGCATGAACTCTGATGAC	5	-	1579	1818
ENSDARG00000005872	ENSDART00000007097	24	13	13	TCCGACCTCGAACAGAAGCTGTT	5	-	1718	1818
ENSDARG00000006010	ENSDART00000009402	24	2	1	ACACACATCAGATGAGGATTGAGCT	7	-	47	966
ENSDARG00000006010	ENSDART00000009402	24	3	2	CACATCACATATGGGGCAGTATTT	6	-	166	966
ENSDARG00000006010	ENSDART00000009402	24	8	7	TGCATCACAGTCATGGCAGCAGGG	6	-	507	966
ENSDARG00000006010	ENSDART00000009402	24	9	8	TTACTCTTCTCCACGTGTAGATGTA	7	-	640	966
ENSDARG00000006010	ENSDART00000009402	24	9	8	CTCTTCTCCACGTGTAGATGTAGGC	7	-	637	966
ENSDARG00000006010	ENSDART00000009402	24	10	9	GTTCAAACCCTCTTGTGGGTGGG	5	-	719	966
ENSDARG00000006010	ENSDART00000009402	24	10	9	GTTCAAACCCTCTTGTGGGTGGGT	6	-	718	966
ENSDARG00000006010	ENSDART00000009402	24	10	9	GTTCAAACCCTCTTGTGGGTGGGTA	7	-	717	966
ENSDARG00000006010	ENSDART00000009402	24	10	9	CAAACCCTCTTGTGGGTGGGTAA	5	-	716	966
ENSDARG00000006010	ENSDART00000009402	24	10	9	TTCAAACCCTCTTGTGGGTGGGT	5	-	718	966
ENSDARG00000006010	ENSDART00000009402	24	10	9	TTCAAACCCTCTTGTGGGTGGGTA	6	-	717	966
ENSDARG00000006010	ENSDART00000009402	24	10	9	TTCAAACCCTCTTGTGGGTGGGTAA	7	-	716	966
ENSDARG00000006010	ENSDART00000066765	24	2	1	ACACACATCAGATGAGGATTGAGCT	7	-	47	966
ENSDARG00000006010	ENSDART00000066765	24	3	2	CACATCACATATGGGGCAGTATTT	6	-	166	966
ENSDARG00000006010	ENSDART00000066765	24	8	7	TGCATCACAGTCATGGCAGCAGGG	6	-	507	966
ENSDARG00000006010	ENSDART00000066765	24	9	8	CTCTTCTCCACGTGTAGATGTAGGC	7	-	637	966
ENSDARG00000006010	ENSDART00000066765	24	9	8	TTACTCTTCTCCACGTGTAGATGTA	7	-	640	966
ENSDARG00000006010	ENSDART00000066765	24	10	9	TTCAAACCCTCTTGTGGGTGGGTAA	7	-	716	966
ENSDARG00000006010	ENSDART00000066765	24	10	9	TTCAAACCCTCTTGTGGGTGGGTA	6	-	717	966
ENSDARG00000006010	ENSDART00000066765	24	10	9	TTCAAACCCTCTTGTGGGTGGGT	5	-	718	966
ENSDARG00000006010	ENSDART00000066765	24	10	9	GTTCAAACCCTCTTGTGGGTGGGTA	7	-	717	966
ENSDARG00000006010	ENSDART00000066765	24	10	9	GTTCAAACCCTCTTGTGGGTGGGT	6	-	718	966
ENSDARG00000006010	ENSDART00000066765	24	10	9	GTTCAAACCCTCTTGTGGGTGGG	5	-	719	966
ENSDARG00000006010	ENSDART00000066765	24	10	9	CAAACCCTCTTGTGGGTGGGTAA	5	-	716	966
ENSDARG00000006010	ENSDART00000106069	24	1	1	ACACACATCAGATGAGGATTGAGCT	7	-	41	969
ENSDARG00000006010	ENSDART00000106069	24	2	2	CACATCACATATGGGGCAGTATTT	6	-	160	969
ENSDARG00000006010	ENSDART00000106069	24	8	8	TGCATCACAGTCATGGCAGCAGGG	6	-	510	969
ENSDARG00000006010	ENSDART00000106069	24	9	9	CTCTTCTCCACGTGTAGATGTAGGC	7	-	640	969
ENSDARG00000006010	ENSDART00000106069	24	9	9	TTACTCTTCTCCACGTGTAGATGTA	7	-	643	969
ENSDARG00000006010	ENSDART00000106069	24	10	10	TTCAAACCCTCTTGTGGGTGGGTAA	7	-	719	969
ENSDARG00000006010	ENSDART00000106069	24	10	10	TTCAAACCCTCTTGTGGGTGGGTA	6	-	720	969
ENSDARG00000006010	ENSDART00000106069	24	10	10	TTCAAACCCTCTTGTGGGTGGGT	5	-	721	969
ENSDARG00000006010	ENSDART00000106069	24	10	10	GTTCAAACCCTCTTGTGGGTGGGTA	7	-	720	969
ENSDARG00000006010	ENSDART00000106069	24	10	10	GTTCAAACCCTCTTGTGGGTGGGT	6	-	721	969
ENSDARG00000006010	ENSDART00000106069	24	10	10	GTTCAAACCCTCTTGTGGGTGGG	5	-	722	969
ENSDARG00000006010	ENSDART00000106069	24	10	10	CAAACCCTCTTGTGGGTGGGTAA	5	-	719	969
ENSDARG00000006617	ENSDART00000017053	24	8	8	AGCGACTACGGCAAGCAGCGGAG	5	+	452	921
ENSDARG00000006617	ENSDART00000017053	24	9	9	CGCTGCGTCTCTTCAGAAGGAGAA	6	+	528	921
ENSDARG00000006617	ENSDART00000017053	24	10	10	GGCTTCAGCGGGAGCGAGGACTGC	6	+	685	921
ENSDARG00000006617	ENSDART00000017053	24	10	10	TCCAGCTGCACAGAGCGGACTAC	5	+	620	921
ENSDARG00000006617	ENSDART00000017053	24	11	11	CTCAGCCACAGGAGGAAGAGGAC	5	+	881	921
ENSDARG00000006617	ENSDART00000017053	24	11	11	TGCTCAGCCACAGGAGGAAGAGGAC	7	+	879	921
ENSDARG00000006849	ENSDART00000105541	24	2	2	TGCACCATCCTGCAGTTGCAGTT	5	-	259	783
ENSDARG00000006849	ENSDART00000105541	24	2	2	GTCGCCCCACGGCGGAGGAAGAT	5	-	146	783
ENSDARG00000006849	ENSDART00000105541	24	2	2	GCAGTCGCCCCACGGCGGAGGAA	5	-	149	783
ENSDARG00000007271	ENSDART00000003884	24	3	1	CTCCACACAGTCTGTTGATGCTGGA	7	+	156	2424
ENSDARG00000007271	ENSDART00000003884	24	3	1	TTCTCCACACAGTCTGTTGATGCT	6	+	154	2424
ENSDARG00000007271	ENSDART00000003884	24	3	1	AGAGGCAACGCGAGAGAAGCTTTC	6	+	53	2424
ENSDARG00000007271	ENSDART00000003884	24	4	2	GACCAAACCACAAACTCTGAGAAC	6	+	1006	2424
ENSDARG00000007271	ENSDART00000003884	24	4	2	GAACAAACCCCTCAGAGAGTTGGAA	7	+	544	2424
ENSDARG00000007271	ENSDART00000003884	24	4	2	GAAAGCTGCATCTTATCTTGGGAT	6	+	303	2424
ENSDARG00000007271	ENSDART00000003884	24	4	2	AGCTGCATCTTATCTTGGGATGCC	6	+	306	2424
ENSDARG00000007271	ENSDART00000003884	24	4	2	AGCAAATAAAGATCAAGAAGTTGAA	7	+	849	2424
ENSDARG00000007271	ENSDART00000003884	24	4	2	AGAGGCAGAGGAAGAGGTCGAGGAA	7	+	637	2424
ENSDARG00000007271	ENSDART00000003884	24	4	2	AGACCAAACCACAAACTCTGAGAAC	7	+	1005	2424
ENSDARG00000007271	ENSDART00000003884	24	4	2	ACCATCAGCGCTCAGAGAGGCAGAG	7	+	622	2424
ENSDARG00000007271	ENSDART00000003884	24	4	2	ACCAAACCACAAACTCTGAGAAC	5	+	1007	2424
ENSDARG00000007271	ENSDART00000003884	24	4	2	ACAAACCCCTCAGAGAGTTGGAA	5	+	546	2424
ENSDARG00000007271	ENSDART00000003884	24	4	2	AACAAACCCCTCAGAGAGTTGGAA	6	+	545	2424
ENSDARG00000007271	ENSDART00000003884	24	9	7	TTCCAAAACCGACCCGACGCAGTG	6	+	2067	2424
ENSDARG00000007271	ENSDART00000003884	24	9	7	TCCAAAACCGACCCGACGCAGTG	5	+	2068	2424
ENSDARG00000007271	ENSDART00000003884	24	9	7	GTAAGCTACGTGGTGGAGCAGTA	5	+	2350	2424
ENSDARG00000007271	ENSDART00000003884	24	9	7	CCCAGCCACCGCCGAGATGGAGCA	6	+	2379	2424
ENSDARG00000007418	ENSDART00000003195	24	1	1	CACCAAAAACAAAAGAGGTAGGC	5	+	237	717
ENSDARG00000007418	ENSDART00000003195	24	1	1	GGCACCAAAAACAAAAGAGGTAGGC	7	+	235	717
ENSDARG00000007418	ENSDART00000003195	24	4	4	GTTGGCAGAACTGGCCGAGTTGGAA	7	+	549	717
ENSDARG00000007418	ENSDART00000003195	24	5	5	AGCCTCAAAGAAGAGAGTGGAGGAT	7	+	666	717
ENSDARG00000007691	ENSDART00000024691	24	2	1	GGCTCAAACAGATTGGGCTGGAGCA	7	+	41	2328
ENSDARG00000007691	ENSDART00000024691	24	3	2	GAAAACACCCACACCTGGGGGGGC	6	+	222	2328
ENSDARG00000007691	ENSDART00000024691	24	3	2	AGAAAACACCCACACCTGGGGGGGC	7	+	221	2328
ENSDARG00000007691	ENSDART00000024691	24	3	2	AGACTCAAAGATTTTCTGAGGAG	5	+	274	2328
ENSDARG00000007691	ENSDART00000024691	24	3	2	AAACACCCACACCTGGGGGGGCA	5	+	224	2328
ENSDARG00000007691	ENSDART00000024691	24	3	2	GAAAACACCCACACCTGGGGGGGCA	7	+	222	2328
ENSDARG00000007691	ENSDART00000024691	24	4	3	TTCTACACACAGCAGTGGGAGGA	5	+	355	2328
ENSDARG00000007691	ENSDART00000024691	24	4	3	TTCTACACACAGCAGTGGGAGGAC	6	+	355	2328
ENSDARG00000007691	ENSDART00000024691	24	4	3	GTTCTACACACAGCAGTGGGAGGAC	7	+	354	2328
ENSDARG00000007691	ENSDART00000024691	24	4	3	CTCAACAGACACTGGGTGCGTCGGG	7	+	421	2328
ENSDARG00000007691	ENSDART00000024691	24	4	3	GTTCTACACACAGCAGTGGGAGGA	6	+	354	2328
ENSDARG00000007691	ENSDART00000024691	24	6	5	ACACCAGACTCGTCAGTGGAGTTG	6	+	593	2328
ENSDARG00000007691	ENSDART00000024691	24	6	5	AACACCAGACTCGTCAGTGGAGTTG	7	+	592	2328
ENSDARG00000007691	ENSDART00000024691	24	9	8	GCAGCCATCGAGAAGTGTGGAGAT	6	+	1051	2328
ENSDARG00000007691	ENSDART00000024691	24	11	10	GACTCCTTACTGAAGAAGAGGTG	5	+	1282	2328
ENSDARG00000007691	ENSDART00000024691	24	14	13	ATCGGCGTCAGTAAAGACTTGAAC	6	+	1534	2328
ENSDARG00000007691	ENSDART00000024691	24	14	13	ACCCTCAGCAAGCGTGTGGGTTC	5	+	1475	2328
ENSDARG00000007691	ENSDART00000024691	24	20	19	AAAGCCTTACACCCCTCTGTGTGT	6	+	2041	2328
ENSDARG00000007691	ENSDART00000024691	24	22	21	TTAAAACACCAGCAGCTTTTGGC	5	+	2182	2328
ENSDARG00000007691	ENSDART00000024691	24	22	21	ACCAGCAGCTTTTGGCAGAAGTG	5	+	2189	2328
ENSDARG00000007691	ENSDART00000106091	24	1	1	GGCTCAAACAGATTGGGCTGGAGCA	7	+	41	2325
ENSDARG00000007691	ENSDART00000106091	24	2	2	GAAAACACCCACACCTGGGGGGGCA	7	+	222	2325
ENSDARG00000007691	ENSDART00000106091	24	2	2	AGACTCAAAGATTTTCTGAGGAG	5	+	274	2325
ENSDARG00000007691	ENSDART00000106091	24	2	2	AGAAAACACCCACACCTGGGGGGGC	7	+	221	2325
ENSDARG00000007691	ENSDART00000106091	24	2	2	AAACACCCACACCTGGGGGGGCA	5	+	224	2325
ENSDARG00000007691	ENSDART00000106091	24	2	2	GAAAACACCCACACCTGGGGGGGC	6	+	222	2325
ENSDARG00000007691	ENSDART00000106091	24	3	3	GTTCTACACACAGCAGTGGGAGGA	6	+	354	2325
ENSDARG00000007691	ENSDART00000106091	24	3	3	GTTCTACACACAGCAGTGGGAGGAC	7	+	354	2325
ENSDARG00000007691	ENSDART00000106091	24	3	3	TTCTACACACAGCAGTGGGAGGA	5	+	355	2325
ENSDARG00000007691	ENSDART00000106091	24	3	3	TTCTACACACAGCAGTGGGAGGAC	6	+	355	2325
ENSDARG00000007691	ENSDART00000106091	24	3	3	CTCAACAGACACTGGGTGCGTCGGG	7	+	421	2325
ENSDARG00000007691	ENSDART00000106091	24	5	5	AACACCAGACTCGTCAGTGGAGTTG	7	+	592	2325
ENSDARG00000007691	ENSDART00000106091	24	5	5	ACACCAGACTCGTCAGTGGAGTTG	6	+	593	2325
ENSDARG00000007691	ENSDART00000106091	24	8	8	GCAGCCATCGAGAAGTGTGGAGAT	6	+	1051	2325
ENSDARG00000007691	ENSDART00000106091	24	10	10	GACTCCTTACTGAAGAAGAGGTG	5	+	1285	2325
ENSDARG00000007691	ENSDART00000106091	24	13	13	ATCGGCGTCAGTAAAGACTTGAAC	6	+	1537	2325
ENSDARG00000007691	ENSDART00000106091	24	13	13	ACCCTCAGCAAGCGTGTGGGTTC	5	+	1478	2325
ENSDARG00000007691	ENSDART00000106091	24	20	20	ACCAGCAGCTTTTGGCAGAAGTG	5	+	2186	2325
ENSDARG00000007691	ENSDART00000106091	24	20	20	TTAAAACACCAGCAGCTTTTGGC	5	+	2179	2325
ENSDARG00000008164	ENSDART00000015580	24	1	1	GAAAACTGCGGAGCATTTGGGGCA	6	-	172	1266
ENSDARG00000008164	ENSDART00000015580	24	3	3	ATCCGCTTCAGATCAGTCTGTGTCT	7	-	269	1266
ENSDARG00000008164	ENSDART00000015580	24	4	4	TCCACCTCCAGCTCTTTAATGAGGC	7	-	485	1266
ENSDARG00000008164	ENSDART00000015580	24	7	7	GTCACCAAACCCTTTCTGTTGAC	5	-	958	1266
ENSDARG00000008164	ENSDART00000015580	24	7	7	GACACCGCCAACCAGGAGTTTGCT	6	-	756	1266
ENSDARG00000008164	ENSDART00000015580	24	7	7	GACACCGCCAACCAGGAGTTTGC	5	-	757	1266
ENSDARG00000008164	ENSDART00000015580	24	7	7	TCCCAAATCCCATGCTGTTTTGCC	6	-	919	1266
ENSDARG00000008164	ENSDART00000015580	24	7	7	CCCAAATCCCATGCTGTTTTGCC	5	-	919	1266
ENSDARG00000008164	ENSDART00000015580	24	7	7	ATCCCATGCTGTTTTGCCTGAGAC	6	-	913	1266
ENSDARG00000008164	ENSDART00000015580	24	7	7	AGACACCGCCAACCAGGAGTTTGCT	7	-	756	1266
ENSDARG00000008164	ENSDART00000015580	24	7	7	AGACACCGCCAACCAGGAGTTTGC	6	-	757	1266
ENSDARG00000008164	ENSDART00000015580	24	7	7	ACCGCCAACCAGGAGTTTGCTGTG	6	-	753	1266
ENSDARG00000008164	ENSDART00000066815	24	1	1	CACAAAAAACAACCTTTGCTTTGAC	7	-	292	1632
ENSDARG00000008164	ENSDART00000066815	24	1	1	CGCCACACACACCAGGCATGATTT	6	-	352	1632
ENSDARG00000008164	ENSDART00000066815	24	1	1	GAAAACTGCGGAGCATTTGGGGCA	6	-	172	1632
ENSDARG00000008164	ENSDART00000066815	24	1	1	GGCTGCACCAGTGTGTGTTTGGT	5	-	418	1632
ENSDARG00000008164	ENSDART00000066815	24	1	1	GGCTGCACCAGTGTGTGTTTGGTG	6	-	417	1632
ENSDARG00000008164	ENSDART00000066815	24	1	1	TGCGGCTGCACCAGTGTGTGTTT	5	-	421	1632
ENSDARG00000008164	ENSDART00000066815	24	1	1	CACAAAAAACAACCTTTGCTTTG	5	-	294	1632
ENSDARG00000008164	ENSDART00000066815	24	1	1	CAACACGCAAATTGCGGATTGGTC	6	-	505	1632
ENSDARG00000008164	ENSDART00000066815	24	1	1	ACAAAAAACAACCTTTGCTTTGAC	6	-	292	1632
ENSDARG00000008164	ENSDART00000066815	24	1	1	ACACAACACGCAAATTGCGGATTG	6	-	508	1632
ENSDARG00000008164	ENSDART00000066815	24	2	2	ATCCGCTTCAGATCAGTCTGTGTCT	7	-	608	1632
ENSDARG00000008164	ENSDART00000066815	24	3	3	TCCACCTCCAGCTCTTTAATGAGGC	7	-	824	1632
ENSDARG00000008164	ENSDART00000066815	24	4	4	GTTTTCAGAAGTTCTTCTGCTGCA	6	-	1023	1632
ENSDARG00000008164	ENSDART00000066815	24	6	6	GACACCGCCAACCAGGAGTTTGC	5	-	1126	1632
ENSDARG00000008164	ENSDART00000066815	24	6	6	ATCCCATGCTGTTTTGCCTGAGAC	6	-	1282	1632
ENSDARG00000008164	ENSDART00000066815	24	6	6	TCCCAAATCCCATGCTGTTTTGCC	6	-	1288	1632
ENSDARG00000008164	ENSDART00000066815	24	6	6	CCCAAATCCCATGCTGTTTTGCC	5	-	1288	1632
ENSDARG00000008164	ENSDART00000066815	24	6	6	AGACACCGCCAACCAGGAGTTTGCT	7	-	1125	1632
ENSDARG00000008164	ENSDART00000066815	24	6	6	GTCACCAAACCCTTTCTGTTGAC	5	-	1327	1632
ENSDARG00000008164	ENSDART00000066815	24	6	6	AGACACCGCCAACCAGGAGTTTGC	6	-	1126	1632
ENSDARG00000008164	ENSDART00000066815	24	6	6	ACCGCCAACCAGGAGTTTGCTGTG	6	-	1122	1632
ENSDARG00000008164	ENSDART00000066815	24	6	6	GACACCGCCAACCAGGAGTTTGCT	6	-	1125	1632
ENSDARG00000008164	ENSDART00000066816	24	1	1	GAAAACTGCGGAGCATTTGGGGCA	6	-	160	1596
ENSDARG00000008164	ENSDART00000066816	24	2	2	GGCTGCACCAGTGTGTGTTTGGTG	6	-	378	1596
ENSDARG00000008164	ENSDART00000066816	24	2	2	CGCCACACACACCAGGCATGATTT	6	-	313	1596
ENSDARG00000008164	ENSDART00000066816	24	2	2	CACAAAAAACAACCTTTGCTTTGAC	7	-	253	1596
ENSDARG00000008164	ENSDART00000066816	24	2	2	CACAAAAAACAACCTTTGCTTTG	5	-	255	1596
ENSDARG00000008164	ENSDART00000066816	24	2	2	CAACACGCAAATTGCGGATTGGTC	6	-	466	1596
ENSDARG00000008164	ENSDART00000066816	24	2	2	GGCTGCACCAGTGTGTGTTTGGT	5	-	379	1596
ENSDARG00000008164	ENSDART00000066816	24	2	2	TGCGGCTGCACCAGTGTGTGTTT	5	-	382	1596
ENSDARG00000008164	ENSDART00000066816	24	2	2	ACACAACACGCAAATTGCGGATTG	6	-	469	1596
ENSDARG00000008164	ENSDART00000066816	24	2	2	ACAAAAAACAACCTTTGCTTTGAC	6	-	253	1596
ENSDARG00000008164	ENSDART00000066816	24	3	3	ATCCGCTTCAGATCAGTCTGTGTCT	7	-	569	1596
ENSDARG00000008164	ENSDART00000066816	24	4	4	TCCACCTCCAGCTCTTTAATGAGGC	7	-	785	1596
ENSDARG00000008164	ENSDART00000066816	24	5	5	GTTTTCAGAAGTTCTTCTGCTGCA	6	-	984	1596
ENSDARG00000008164	ENSDART00000066816	24	7	7	TCCCAAATCCCATGCTGTTTTGCC	6	-	1249	1596
ENSDARG00000008164	ENSDART00000066816	24	7	7	GTCACCAAACCCTTTCTGTTGAC	5	-	1288	1596
ENSDARG00000008164	ENSDART00000066816	24	7	7	GACACCGCCAACCAGGAGTTTGCT	6	-	1086	1596
ENSDARG00000008164	ENSDART00000066816	24	7	7	ACCGCCAACCAGGAGTTTGCTGTG	6	-	1083	1596
ENSDARG00000008164	ENSDART00000066816	24	7	7	AGACACCGCCAACCAGGAGTTTGC	6	-	1087	1596
ENSDARG00000008164	ENSDART00000066816	24	7	7	AGACACCGCCAACCAGGAGTTTGCT	7	-	1086	1596
ENSDARG00000008164	ENSDART00000066816	24	7	7	ATCCCATGCTGTTTTGCCTGAGAC	6	-	1243	1596
ENSDARG00000008164	ENSDART00000066816	24	7	7	CCCAAATCCCATGCTGTTTTGCC	5	-	1249	1596
ENSDARG00000008164	ENSDART00000066816	24	7	7	GACACCGCCAACCAGGAGTTTGC	5	-	1087	1596
ENSDARG00000008164	ENSDART00000066817	24	3	3	GGCTGCACCAGTGTGTGTTTGGTG	6	-	393	1557
ENSDARG00000008164	ENSDART00000066817	24	3	3	CGCCACACACACCAGGCATGATTT	6	-	328	1557
ENSDARG00000008164	ENSDART00000066817	24	3	3	CACAAAAAACAACCTTTGCTTTGAC	7	-	268	1557
ENSDARG00000008164	ENSDART00000066817	24	3	3	CACAAAAAACAACCTTTGCTTTG	5	-	270	1557
ENSDARG00000008164	ENSDART00000066817	24	3	3	CAACACGCAAATTGCGGATTGGTC	6	-	481	1557
ENSDARG00000008164	ENSDART00000066817	24	3	3	GGCTGCACCAGTGTGTGTTTGGT	5	-	394	1557
ENSDARG00000008164	ENSDART00000066817	24	3	3	TGCGGCTGCACCAGTGTGTGTTT	5	-	397	1557
ENSDARG00000008164	ENSDART00000066817	24	3	3	ACACAACACGCAAATTGCGGATTG	6	-	484	1557
ENSDARG00000008164	ENSDART00000066817	24	3	3	ACAAAAAACAACCTTTGCTTTGAC	6	-	268	1557
ENSDARG00000008164	ENSDART00000066817	24	4	4	ATCCGCTTCAGATCAGTCTGTGTCT	7	-	584	1557
ENSDARG00000008164	ENSDART00000066817	24	5	5	TCCACCTCCAGCTCTTTAATGAGGC	7	-	746	1557
ENSDARG00000008164	ENSDART00000066817	24	6	6	GTTTTCAGAAGTTCTTCTGCTGCA	6	-	945	1557
ENSDARG00000008164	ENSDART00000066817	24	8	8	GTCACCAAACCCTTTCTGTTGAC	5	-	1249	1557
ENSDARG00000008164	ENSDART00000066817	24	8	8	TCCCAAATCCCATGCTGTTTTGCC	6	-	1210	1557
ENSDARG00000008164	ENSDART00000066817	24	8	8	GACACCGCCAACCAGGAGTTTGCT	6	-	1047	1557
ENSDARG00000008164	ENSDART00000066817	24	8	8	ACCGCCAACCAGGAGTTTGCTGTG	6	-	1044	1557
ENSDARG00000008164	ENSDART00000066817	24	8	8	AGACACCGCCAACCAGGAGTTTGC	6	-	1048	1557
ENSDARG00000008164	ENSDART00000066817	24	8	8	AGACACCGCCAACCAGGAGTTTGCT	7	-	1047	1557
ENSDARG00000008164	ENSDART00000066817	24	8	8	ATCCCATGCTGTTTTGCCTGAGAC	6	-	1204	1557
ENSDARG00000008164	ENSDART00000066817	24	8	8	CCCAAATCCCATGCTGTTTTGCC	5	-	1210	1557
ENSDARG00000008164	ENSDART00000066817	24	8	8	GACACCGCCAACCAGGAGTTTGC	5	-	1048	1557
ENSDARG00000008164	ENSDART00000082446	24	2	2	GAAAACTGCGGAGCATTTGGGGCA	6	-	175	1194
ENSDARG00000008164	ENSDART00000082446	24	3	3	TCCACCTCCAGCTCTTTAATGAGGC	7	-	383	1194
ENSDARG00000008164	ENSDART00000082446	24	4	4	GTTTTCAGAAGTTCTTCTGCTGCA	6	-	582	1194
ENSDARG00000008164	ENSDART00000082446	24	6	6	TCCCAAATCCCATGCTGTTTTGCC	6	-	847	1194
ENSDARG00000008164	ENSDART00000082446	24	6	6	GTCACCAAACCCTTTCTGTTGAC	5	-	886	1194
ENSDARG00000008164	ENSDART00000082446	24	6	6	GACACCGCCAACCAGGAGTTTGCT	6	-	684	1194
ENSDARG00000008164	ENSDART00000082446	24	6	6	GACACCGCCAACCAGGAGTTTGC	5	-	685	1194
ENSDARG00000008164	ENSDART00000082446	24	6	6	CCCAAATCCCATGCTGTTTTGCC	5	-	847	1194
ENSDARG00000008164	ENSDART00000082446	24	6	6	ATCCCATGCTGTTTTGCCTGAGAC	6	-	841	1194
ENSDARG00000008164	ENSDART00000082446	24	6	6	AGACACCGCCAACCAGGAGTTTGCT	7	-	684	1194
ENSDARG00000008164	ENSDART00000082446	24	6	6	AGACACCGCCAACCAGGAGTTTGC	6	-	685	1194
ENSDARG00000008164	ENSDART00000082446	24	6	6	ACCGCCAACCAGGAGTTTGCTGTG	6	-	681	1194
ENSDARG00000008292	ENSDART00000023833	24	3	3	TTCCTCTCCAGCTCGTTTTTGAA	5	-	214	1416
ENSDARG00000008292	ENSDART00000023833	24	3	3	CTCTCCAGCTCGTTTTTGAATCT	5	-	211	1416
ENSDARG00000008292	ENSDART00000023833	24	4	4	GAACTCATCAGGTGTGCTGCTGCC	6	-	325	1416
ENSDARG00000008292	ENSDART00000023833	24	6	6	GCCAAATGCTCTGACGTCTGAGGC	6	-	510	1416
ENSDARG00000008292	ENSDART00000023833	24	6	6	GCCAAATGCTCTGACGTCTGAGGCT	7	-	509	1416
ENSDARG00000008292	ENSDART00000023833	24	7	7	GTCTCATACCAATAAGTCGAGGCT	6	-	767	1416
ENSDARG00000008292	ENSDART00000023833	24	9	9	TTCGGCAAAAAGTGAGACGATTTT	6	-	958	1416
ENSDARG00000008292	ENSDART00000023833	24	10	10	GCAGTCTTCTCAAGAGGAAGTAGGA	7	-	1129	1416
ENSDARG00000008292	ENSDART00000023833	24	11	11	TTCTCCCCCACCTCTGTGCAAAC	5	-	1306	1416
ENSDARG00000008292	ENSDART00000023833	24	12	12	ATCGTCGACTGTTGGTGTGATGGT	6	-	1399	1416
ENSDARG00000008292	ENSDART00000106055	24	1	1	TTCCTCTCCAGCTCGTTTTTGAA	5	-	22	840
ENSDARG00000008292	ENSDART00000106055	24	1	1	CTCTCCAGCTCGTTTTTGAATCT	5	-	19	840
ENSDARG00000008292	ENSDART00000106055	24	2	2	GAACTCATCAGGTGTGCTGCTGCC	6	-	133	840
ENSDARG00000008292	ENSDART00000106055	24	4	4	GCCAAATGCTCTGACGTCTGAGGCT	7	-	317	840
ENSDARG00000008292	ENSDART00000106055	24	4	4	GCCAAATGCTCTGACGTCTGAGGC	6	-	318	840
ENSDARG00000008292	ENSDART00000106055	24	5	5	GCAGTCTTCTCAAGAGGAAGTAGGA	7	-	562	840
ENSDARG00000008292	ENSDART00000106055	24	6	6	TTCTCCCCCACCTCTGTGCAAAC	5	-	739	840
ENSDARG00000008292	ENSDART00000106055	24	7	7	ATCGTCGACTGTTGGTGTGATGGT	6	-	832	840
ENSDARG00000008359	ENSDART00000002763	24	4	4	GGCCAAAGCGAGAAGTGTGGTCT	5	-	365	987
ENSDARG00000008359	ENSDART00000002763	24	5	5	ATCATCAAAATTTCTTTGCTGCT	5	-	449	987
ENSDARG00000008359	ENSDART00000105718	24	2	2	AGATTCTACAGATATGTCTGCATGC	7	-	48	951
ENSDARG00000008359	ENSDART00000105718	24	5	5	GGCCAAAGCGAGAAGTGTGGTCT	5	-	374	951
ENSDARG00000008359	ENSDART00000105718	24	6	6	ATCATCAAAATTTCTTTGCTGCT	5	-	458	951
ENSDARG00000008359	ENSDART00000105719	24	3	3	AGATTCTACAGATATGTCTGCATGC	7	-	45	993
ENSDARG00000008359	ENSDART00000105719	24	6	6	GGCCAAAGCGAGAAGTGTGGTCT	5	-	371	993
ENSDARG00000008359	ENSDART00000105719	24	7	7	ATCATCAAAATTTCTTTGCTGCT	5	-	455	993
ENSDARG00000008359	ENSDART00000105720	24	2	2	AGATTCTACAGATATGTCTGCATGC	7	-	45	993
ENSDARG00000008359	ENSDART00000105720	24	5	5	GGCCAAAGCGAGAAGTGTGGTCT	5	-	371	993
ENSDARG00000008359	ENSDART00000105720	24	6	6	ATCATCAAAATTTCTTTGCTGCT	5	-	455	993
ENSDARG00000008790	ENSDART00000045150	24	1	1	CTCGGCCCCCTCCATGCGTGATTG	6	+	20	1257
ENSDARG00000008790	ENSDART00000045150	24	6	6	TACTCATGCTATACCAGTGGTAAAC	7	+	534	1257
ENSDARG00000008790	ENSDART00000045150	24	7	7	GCATTCCTCCAGAACAGTCGCTGGA	7	+	653	1257
ENSDARG00000008790	ENSDART00000045150	24	7	7	TCCTCCAGAACAGTCGCTGGAGAC	6	+	657	1257
ENSDARG00000008790	ENSDART00000045150	24	9	9	TGCAGCCCATCTCAGATGTTGTG	5	+	890	1257
ENSDARG00000008790	ENSDART00000045150	24	10	10	GACTGCAGAGGGACCTGAAGCGTGT	7	+	1013	1257
ENSDARG00000008790	ENSDART00000045150	24	12	12	CAAGTCTGCCATACTAAGAAGGA	5	+	1186	1257
ENSDARG00000008790	ENSDART00000045150	24	12	12	GTCGCCACAACCCTGTCTTTGGCA	6	+	1235	1257
ENSDARG00000008790	ENSDART00000045150	24	12	12	GTCGCCACAACCCTGTCTTTGGC	5	+	1235	1257
ENSDARG00000008921	ENSDART00000023012	24	2	2	CTACAAACCTCAGAGAAGATGCT	5	-	84	981
ENSDARG00000008921	ENSDART00000023012	24	2	2	CCCTACAAACCTCAGAGAAGATGCT	7	-	84	981
ENSDARG00000008921	ENSDART00000023012	24	2	2	ACAAACCTCAGAGAAGATGCTGCA	6	-	81	981
ENSDARG00000008921	ENSDART00000023012	24	2	2	AACCTCAGAGAAGATGCTGCAGAG	6	-	78	981
ENSDARG00000008921	ENSDART00000023012	24	4	4	AGCTCATAATAGAGGTCTGGGTA	5	-	412	981
ENSDARG00000008921	ENSDART00000023012	24	4	4	AGCTCATAATAGAGGTCTGGGTAG	6	-	411	981
ENSDARG00000008921	ENSDART00000023012	24	5	5	TACTTCTTCAGAAGGGGCCTGAGTT	7	-	680	981
ENSDARG00000008921	ENSDART00000023012	24	6	6	AACTTCAAAGTTGGACTTTGTGTTT	7	-	973	981
ENSDARG00000008921	ENSDART00000023012	24	6	6	ACACACTTCCCGTCGGGCTGCAGGT	7	-	929	981
ENSDARG00000008921	ENSDART00000023012	24	6	6	AACACCAGCTCCACTGACGACGAA	6	-	775	981
ENSDARG00000009031	ENSDART00000008374	24	5	5	GCCCTCGGCGGGCGAGTGGCTTTG	6	-	370	1611
ENSDARG00000009031	ENSDART00000008374	24	6	6	CTCATCATCTTCTGTCGGGGACGTC	7	-	492	1611
ENSDARG00000009031	ENSDART00000008374	24	6	6	GTCCACAAAAGGAGTGAAGGAGGC	6	-	454	1611
ENSDARG00000009031	ENSDART00000008374	24	6	6	GTCCTCATCATCTTCTGTCGGGGAC	7	-	495	1611
ENSDARG00000009031	ENSDART00000008374	24	6	6	GTTGTCCTCATCATCTTCTGTCGGG	7	-	498	1611
ENSDARG00000009031	ENSDART00000008374	24	8	8	CCCTCCAGAACATCCATCTGTTGAA	7	-	809	1611
ENSDARG00000009031	ENSDART00000008374	24	10	10	TTAATCCTCTCGTATTTGACTGT	5	-	991	1611
ENSDARG00000009031	ENSDART00000008374	24	11	11	TCCACCAGCAAAGGCTTGTGCTGAA	7	-	1109	1611
ENSDARG00000009031	ENSDART00000008374	24	11	11	CAAATCCACCAGCAAAGGCTTGTGC	7	-	1113	1611
ENSDARG00000009031	ENSDART00000008374	24	11	11	ACCAGCAAAGGCTTGTGCTGAAGGT	7	-	1106	1611
ENSDARG00000009031	ENSDART00000008374	24	11	11	AACCAACACTGGAGCCGTAGATGAC	7	-	1165	1611
ENSDARG00000009031	ENSDART00000008374	24	11	11	AAATCCACCAGCAAAGGCTTGTGC	6	-	1113	1611
ENSDARG00000009031	ENSDART00000008374	24	11	11	AAAACCAACACTGGAGCCGTAGAT	6	-	1168	1611
ENSDARG00000009031	ENSDART00000008374	24	12	12	AGCACCACAATGGCGTGAGGGGTAA	7	-	1253	1611
ENSDARG00000009031	ENSDART00000008374	24	12	12	AGAAGCATCTCCATGCCGTCGGT	5	-	1285	1611
ENSDARG00000009031	ENSDART00000008374	24	12	12	AACCTACCAACAGAGGTGGGCATCT	7	-	1382	1611
ENSDARG00000009031	ENSDART00000008374	24	12	12	AAAACCTACCAACAGAGGTGGGC	5	-	1386	1611
ENSDARG00000009031	ENSDART00000008374	24	13	13	TCCCCAGCCCATGATCTGGTTGGAG	7	-	1410	1611
ENSDARG00000009031	ENSDART00000008374	24	13	13	CCCAGCCCATGATCTGGTTGGAGTG	7	-	1408	1611
ENSDARG00000009031	ENSDART00000008374	24	13	13	CCCAGCCCATGATCTGGTTGGAG	5	-	1410	1611
ENSDARG00000009031	ENSDART00000008374	24	14	14	TACCAATTCATCATGGAGTTTCT	5	-	1600	1611
ENSDARG00000009031	ENSDART00000017384	24	3	3	GAAGGCACCATAGTAGGTGGCGAT	6	-	199	1512
ENSDARG00000009031	ENSDART00000017384	24	9	9	CTCTCATTCGGCAGGTCTTTGAT	5	-	820	1512
ENSDARG00000009031	ENSDART00000017384	24	11	11	TCCTTCTGCTCCTCAATGCGCTTCT	7	-	1124	1512
ENSDARG00000009031	ENSDART00000017384	24	11	11	TTCTGCCTCTCAGCCAGTAGTTGGC	7	-	1103	1512
ENSDARG00000009031	ENSDART00000017384	24	11	11	CGCTCCTTATTGGCCAGCTGTAGAC	7	-	1022	1512
ENSDARG00000009031	ENSDART00000017384	24	11	11	TTCTGCTGCTGCTCCAGCTGTTGTC	7	-	1064	1512
ENSDARG00000009031	ENSDART00000017384	24	11	11	CTCTCAGCCAGTAGTTGGCGCTTGT	7	-	1097	1512
ENSDARG00000009031	ENSDART00000017384	24	11	11	AGAGTCGACTCACCGGGGATGTT	5	-	982	1512
ENSDARG00000009031	ENSDART00000017384	24	11	11	GGCTTCAGAACGCTCCTTATTGGCC	7	-	1032	1512
ENSDARG00000009031	ENSDART00000017384	24	12	12	CTCCTCCTCTCTCCGCAGCTGCT	5	-	1241	1512
ENSDARG00000009031	ENSDART00000017384	24	12	12	CGCTCCTCCTCTCTCCGCAGCTGCT	7	-	1241	1512
ENSDARG00000009031	ENSDART00000017384	24	13	13	TGCAACCGCTCGGCCTGACGCTGCT	7	-	1313	1512
ENSDARG00000009031	ENSDART00000017384	24	13	13	GGCTCCTGCTGCTGTTGTTGCAGTG	7	-	1373	1512
ENSDARG00000009031	ENSDART00000017384	24	13	13	GCCGGCTTATCACTTGGGTTGAC	5	-	1441	1512
ENSDARG00000009031	ENSDART00000017384	24	13	13	GCCCTCTCCTGCTGGAGCTGCCGCT	7	-	1337	1512
ENSDARG00000009031	ENSDART00000017384	24	13	13	CTCTCCTGCTGGAGCTGCCGCTGCA	7	-	1334	1512
ENSDARG00000009031	ENSDART00000035310	24	2	2	GAAGGCACCATAGTAGGTGGCGAT	6	-	130	3774
ENSDARG00000009031	ENSDART00000035310	24	8	8	CTCTCATTCGGCAGGTCTTTGAT	5	-	754	3774
ENSDARG00000009031	ENSDART00000035310	24	10	10	CTCTCAGCCAGTAGTTGGCGCTTGT	7	-	1031	3774
ENSDARG00000009031	ENSDART00000035310	24	10	10	CGCTCCTTATTGGCCAGCTGTAGAC	7	-	956	3774
ENSDARG00000009031	ENSDART00000035310	24	10	10	GGCTTCAGAACGCTCCTTATTGGCC	7	-	966	3774
ENSDARG00000009031	ENSDART00000035310	24	10	10	AGAGTCGACTCACCGGGGATGTT	5	-	916	3774
ENSDARG00000009031	ENSDART00000035310	24	10	10	TTCTGCTGCTGCTCCAGCTGTTGTC	7	-	998	3774
ENSDARG00000009031	ENSDART00000035310	24	10	10	TTCTGCCTCTCAGCCAGTAGTTGGC	7	-	1037	3774
ENSDARG00000009031	ENSDART00000035310	24	10	10	TCCTTCTGCTCCTCAATGCGCTTCT	7	-	1058	3774
ENSDARG00000009031	ENSDART00000035310	24	11	11	CTCCTCCTCTCTCCGCAGCTGCT	5	-	1175	3774
ENSDARG00000009031	ENSDART00000035310	24	11	11	CGCTCCTCCTCTCTCCGCAGCTGCT	7	-	1175	3774
ENSDARG00000009031	ENSDART00000035310	24	12	12	GGCTCCTGCTGCTGTTGTTGCAGTG	7	-	1307	3774
ENSDARG00000009031	ENSDART00000035310	24	12	12	GCCGGCTTATCACTTGGGTTGAC	5	-	1375	3774
ENSDARG00000009031	ENSDART00000035310	24	12	12	TGCAACCGCTCGGCCTGACGCTGCT	7	-	1247	3774
ENSDARG00000009031	ENSDART00000035310	24	12	12	CTCTCCTGCTGGAGCTGCCGCTGCA	7	-	1268	3774
ENSDARG00000009031	ENSDART00000035310	24	12	12	GCCCTCTCCTGCTGGAGCTGCCGCT	7	-	1271	3774
ENSDARG00000009031	ENSDART00000035310	24	13	13	GTTGGCCACTTTGTGCTGGAGAG	5	-	1451	3774
ENSDARG00000009031	ENSDART00000035310	24	14	14	TCCTGCCTCAGCCAGGAGCCGCG	5	-	1771	3774
ENSDARG00000009031	ENSDART00000035310	24	17	17	TGCCACTGCTGGTCCTCTGGAGAG	6	-	1973	3774
ENSDARG00000009031	ENSDART00000035310	24	21	21	GCCCTCGGCGGGCGAGTGGCTTTG	6	-	2527	3774
ENSDARG00000009031	ENSDART00000035310	24	22	22	GTCCTCATCATCTTCTGTCGGGGAC	7	-	2652	3774
ENSDARG00000009031	ENSDART00000035310	24	22	22	GTCCACAAAAGGAGTGAAGGAGGC	6	-	2611	3774
ENSDARG00000009031	ENSDART00000035310	24	22	22	CTCATCATCTTCTGTCGGGGACGTC	7	-	2649	3774
ENSDARG00000009031	ENSDART00000035310	24	22	22	GTTGTCCTCATCATCTTCTGTCGGG	7	-	2655	3774
ENSDARG00000009031	ENSDART00000035310	24	24	24	CCCTCCAGAACATCCATCTGTTGAA	7	-	2966	3774
ENSDARG00000009031	ENSDART00000035310	24	26	26	TTAATCCTCTCGTATTTGACTGT	5	-	3148	3774
ENSDARG00000009031	ENSDART00000035310	24	27	27	AAATCCACCAGCAAAGGCTTGTGC	6	-	3270	3774
ENSDARG00000009031	ENSDART00000035310	24	27	27	AACCAACACTGGAGCCGTAGATGAC	7	-	3322	3774
ENSDARG00000009031	ENSDART00000035310	24	27	27	ACCAGCAAAGGCTTGTGCTGAAGGT	7	-	3263	3774
ENSDARG00000009031	ENSDART00000035310	24	27	27	TCCACCAGCAAAGGCTTGTGCTGAA	7	-	3266	3774
ENSDARG00000009031	ENSDART00000035310	24	27	27	AAAACCAACACTGGAGCCGTAGAT	6	-	3325	3774
ENSDARG00000009031	ENSDART00000035310	24	27	27	CAAATCCACCAGCAAAGGCTTGTGC	7	-	3270	3774
ENSDARG00000009031	ENSDART00000035310	24	28	28	AGAAGCATCTCCATGCCGTCGGT	5	-	3448	3774
ENSDARG00000009031	ENSDART00000035310	24	28	28	AACCTACCAACAGAGGTGGGCATCT	7	-	3545	3774
ENSDARG00000009031	ENSDART00000035310	24	28	28	AGCACCACAATGGCGTGAGGGGTAA	7	-	3416	3774
ENSDARG00000009031	ENSDART00000035310	24	28	28	AAAACCTACCAACAGAGGTGGGC	5	-	3549	3774
ENSDARG00000009031	ENSDART00000035310	24	29	29	TCCCCAGCCCATGATCTGGTTGGAG	7	-	3573	3774
ENSDARG00000009031	ENSDART00000035310	24	29	29	CCCAGCCCATGATCTGGTTGGAG	5	-	3573	3774
ENSDARG00000009031	ENSDART00000035310	24	29	29	CCCAGCCCATGATCTGGTTGGAGTG	7	-	3571	3774
ENSDARG00000009031	ENSDART00000035310	24	30	30	TACCAATTCATCATGGAGTTTCT	5	-	3763	3774
ENSDARG00000009178	ENSDART00000009473	24	2	2	AACAGCTGCTACACACGAATGGTAA	7	-	70	810
ENSDARG00000009178	ENSDART00000009473	24	5	5	GCAGCCATCCTAGCCTTTGGTTGC	6	-	315	810
ENSDARG00000009342	ENSDART00000002394	24	1	1	AAACACACATATACGGTGGAGAT	5	+	100	1209
ENSDARG00000009342	ENSDART00000002394	24	6	6	GTACTCAGCACTATGAAGTGTGT	5	+	656	1209
ENSDARG00000009342	ENSDART00000002394	24	10	10	CACTCCTAATGTTCCGGGCGGGGCA	7	+	1115	1209
ENSDARG00000009626	ENSDART00000004296	24	8	8	TTCCAACACAGCCATCTGGAGAA	5	-	590	1359
ENSDARG00000009626	ENSDART00000004296	24	8	8	TACAAACCCTCATAAGTGGGTCTTC	7	-	676	1359
ENSDARG00000009626	ENSDART00000004296	24	8	8	CAAACCCTCATAAGTGGGTCTTC	5	-	676	1359
ENSDARG00000009626	ENSDART00000004296	24	10	10	GTTTTCTCCTCCACGCAGTTTTC	5	-	838	1359
ENSDARG00000009626	ENSDART00000004296	24	12	12	CACCGCCTCCACCTGCTCTTGGGAC	7	-	1050	1359
ENSDARG00000009626	ENSDART00000004296	24	12	12	ACCGCCTCCACCTGCTCTTGGGAC	6	-	1050	1359
ENSDARG00000009626	ENSDART00000004296	24	13	13	TTACTCACATGTGTTTTAGTCGTC	6	-	1155	1359
ENSDARG00000009626	ENSDART00000004296	24	14	14	TCCAGCTTCAAGAAAAGAGTGAGCT	7	-	1169	1359
ENSDARG00000009626	ENSDART00000105696	24	2	2	CAAACCCTCATAAGTGGGTCTTC	5	-	139	711
ENSDARG00000009626	ENSDART00000105696	24	2	2	TACAAACCCTCATAAGTGGGTCTTC	7	-	139	711
ENSDARG00000009626	ENSDART00000105696	24	2	2	TTCCAACACAGCCATCTGGAGAA	5	-	53	711
ENSDARG00000009626	ENSDART00000105696	24	4	4	GTTTTCTCCTCCACGCAGTTTTC	5	-	301	711
ENSDARG00000009626	ENSDART00000105696	24	6	6	ACCGCCTCCACCTGCTCTTGGGAC	6	-	513	711
ENSDARG00000009626	ENSDART00000105696	24	6	6	CACCGCCTCCACCTGCTCTTGGGAC	7	-	513	711
ENSDARG00000009626	ENSDART00000105696	24	7	7	TTACTCACATGTGTTTTAGTCGTC	6	-	618	711
ENSDARG00000009851	ENSDART00000021272	24	1	1	AAAAACTGCTTCACGGAGATGCA	5	+	49	816
ENSDARG00000009851	ENSDART00000021272	24	1	1	AACTGCTTCACGGAGATGCAGGT	5	+	52	816
ENSDARG00000009851	ENSDART00000021272	24	2	2	GACGGCCTCGTGCTGATTTGGAA	5	+	148	816
ENSDARG00000009851	ENSDART00000021272	24	2	2	GTTTGCGTCTGCAGGCGATGACGGC	7	+	129	816
ENSDARG00000009851	ENSDART00000021272	24	3	3	TACACCTTCATCAGAGGAGGAAAC	6	+	238	816
ENSDARG00000009851	ENSDART00000021272	24	4	4	GCAGTCCTCTGTAAAGGTGTGTGT	6	+	360	816
ENSDARG00000009851	ENSDART00000021272	24	5	5	AACCAAGACTTTGAGCTGCAGTG	5	+	439	816
ENSDARG00000009868	ENSDART00000002992	24	2	1	GTTGGCTTCTGGTTCTGACTGGTCT	7	-	63	1635
ENSDARG00000009868	ENSDART00000002992	24	2	1	GACATCCCAGAACTGGACTGAGAG	6	-	15	1635
ENSDARG00000009868	ENSDART00000002992	24	4	3	GCCTCAGCCAGCATATGTGTGAAAC	7	-	410	1635
ENSDARG00000009868	ENSDART00000002992	24	4	3	TCCACCTCCTGTGTGTCTGGTTG	5	-	322	1635
ENSDARG00000009868	ENSDART00000002992	24	6	5	CTCCACAAAATACTTTCTGCTGAT	6	-	536	1635
ENSDARG00000009868	ENSDART00000002992	24	12	11	GAAGCCGCAAGTCCCTCTTTTGGT	6	-	1197	1635
ENSDARG00000009868	ENSDART00000002992	24	13	12	AACTTCTGCCCAGTGCTGAATTC	5	-	1375	1635
ENSDARG00000009868	ENSDART00000002992	24	13	12	TTATGCCTCTTCAGTGCTGCAGGA	6	-	1272	1635
ENSDARG00000010075	ENSDART00000020982	24	1	1	CACCACAGACTGCGTGGAGAAGCC	6	+	21	2502
ENSDARG00000010075	ENSDART00000020982	24	1	1	CTCCCCTGCTCATCTCTGCTGTG	5	+	110	2502
ENSDARG00000010075	ENSDART00000020982	24	1	1	TGCCAAGCAGGAGAGGCGCTTTG	5	+	210	2502
ENSDARG00000010075	ENSDART00000020982	24	1	1	AAAAGCGCAAAGTCAGTGCGTCTGT	7	+	607	2502
ENSDARG00000010075	ENSDART00000020982	24	3	3	GTTGTCTTCTTTCGGCATGATGT	5	+	918	2502
ENSDARG00000010075	ENSDART00000020982	24	4	4	TACAGCATCACTTTTTTTGGAGCG	6	+	1225	2502
ENSDARG00000010075	ENSDART00000020982	24	4	4	GTTACCACAGCCGTGATGCTTCT	5	+	2071	2502
ENSDARG00000010075	ENSDART00000020982	24	4	4	GTCTTCAAAGAGAATTTGGGAAC	5	+	1807	2502
ENSDARG00000010075	ENSDART00000020982	24	4	4	GACGTCTTCAAAGAGAATTTGGG	5	+	1804	2502
ENSDARG00000010075	ENSDART00000020982	24	4	4	TACATCGGCCTCATGACGCCTTT	5	+	1144	2502
ENSDARG00000010075	ENSDART00000020982	24	4	4	GACCAAATCCTGGACGAAGGTGTT	6	+	1446	2502
ENSDARG00000010075	ENSDART00000020982	24	4	4	CTCATCTCCTGTTGGCAGCAGAC	5	+	1024	2502
ENSDARG00000010075	ENSDART00000020982	24	4	4	CGCTCCGTCCGCTCTTTTTGCCTGT	7	+	1168	2502
ENSDARG00000010075	ENSDART00000020982	24	4	4	ATCTACAGCATCACTTTTTTTGGAG	7	+	1222	2502
ENSDARG00000010075	ENSDART00000020982	24	4	4	ATCTACAGCATCACTTTTTTTGGA	6	+	1222	2502
ENSDARG00000010075	ENSDART00000020982	24	4	4	ATCGTCAGCATTTACGGCTGCTTTC	7	+	1498	2502
ENSDARG00000010075	ENSDART00000020982	24	4	4	AGCTCAATCTGAGCGCAGAAGAC	5	+	1784	2502
ENSDARG00000010075	ENSDART00000020982	24	4	4	ACACCATCCAAAACATTGCGGTTAC	7	+	2051	2502
ENSDARG00000010075	ENSDART00000020982	24	4	4	TTCCTCGTCCTTAACGGACGGCGGG	7	+	1249	2502
ENSDARG00000010075	ENSDART00000105700	24	1	1	AAAAGCGCAAAGTCAGTGCGTCTGT	7	+	598	2496
ENSDARG00000010075	ENSDART00000105700	24	1	1	CTCCCCTGCTCATCTCTGCTGTG	5	+	101	2496
ENSDARG00000010075	ENSDART00000105700	24	1	1	TGCCAAGCAGGAGAGGCGCTTTG	5	+	201	2496
ENSDARG00000010075	ENSDART00000105700	24	1	1	CACCACAGACTGCGTGGAGAAGCC	6	+	12	2496
ENSDARG00000010075	ENSDART00000105700	24	6	6	GTTGTCTTCTTTCGGCATGATGT	5	+	918	2496
ENSDARG00000010075	ENSDART00000105700	24	7	7	TACAGCATCACTTTTTTTGGAGCG	6	+	1225	2496
ENSDARG00000010075	ENSDART00000105700	24	7	7	TACATCGGCCTCATGACGCCTTT	5	+	1144	2496
ENSDARG00000010075	ENSDART00000105700	24	7	7	GTTACCACAGCCGTGATGCTTCT	5	+	2071	2496
ENSDARG00000010075	ENSDART00000105700	24	7	7	GTCTTCAAAGAGAATTTGGGAAC	5	+	1807	2496
ENSDARG00000010075	ENSDART00000105700	24	7	7	TTCCTCGTCCTTAACGGACGGCGGG	7	+	1249	2496
ENSDARG00000010075	ENSDART00000105700	24	7	7	GACGTCTTCAAAGAGAATTTGGG	5	+	1804	2496
ENSDARG00000010075	ENSDART00000105700	24	7	7	GACCAAATCCTGGACGAAGGTGTT	6	+	1446	2496
ENSDARG00000010075	ENSDART00000105700	24	7	7	ACACCATCCAAAACATTGCGGTTAC	7	+	2051	2496
ENSDARG00000010075	ENSDART00000105700	24	7	7	AGCTCAATCTGAGCGCAGAAGAC	5	+	1784	2496
ENSDARG00000010075	ENSDART00000105700	24	7	7	ATCGTCAGCATTTACGGCTGCTTTC	7	+	1498	2496
ENSDARG00000010075	ENSDART00000105700	24	7	7	ATCTACAGCATCACTTTTTTTGGA	6	+	1222	2496
ENSDARG00000010075	ENSDART00000105700	24	7	7	ATCTACAGCATCACTTTTTTTGGAG	7	+	1222	2496
ENSDARG00000010075	ENSDART00000105700	24	7	7	CGCTCCGTCCGCTCTTTTTGCCTGT	7	+	1168	2496
ENSDARG00000010075	ENSDART00000105700	24	7	7	CTCATCTCCTGTTGGCAGCAGAC	5	+	1024	2496
ENSDARG00000010155	ENSDART00000031245	24	2	2	TACACCACCCAATCGCTGGCGAG	5	+	166	1473
ENSDARG00000010155	ENSDART00000031245	24	2	2	GGCCTCACAGCTGCGGAGGATGGA	6	+	246	1473
ENSDARG00000010155	ENSDART00000031245	24	2	2	CTACACCACCCAATCGCTGGCGAG	6	+	165	1473
ENSDARG00000010155	ENSDART00000031245	24	3	3	GACTACAACGTTCTGGATGATGTG	6	+	433	1473
ENSDARG00000010155	ENSDART00000031245	24	3	3	GACTACAACGTTCTGGATGATGT	5	+	433	1473
ENSDARG00000010155	ENSDART00000031245	24	3	3	CGCTCCCGCCAACGTGGAGCGGCC	6	+	384	1473
ENSDARG00000010155	ENSDART00000031245	24	3	3	CCCGCCAACGTGGAGCGGCCGGT	5	+	388	1473
ENSDARG00000010155	ENSDART00000031245	24	3	3	GACATCCACAAGGAGAAGGTGGC	5	+	301	1473
ENSDARG00000010155	ENSDART00000031245	24	4	4	CAATCAGTCCATCAGAGGAGGAA	5	+	483	1473
ENSDARG00000010155	ENSDART00000031245	24	4	4	GTCCACCGCTGGCGGGACGAGGAA	6	+	545	1473
ENSDARG00000010155	ENSDART00000031245	24	4	4	AACCTCCCAGTCCACCGCTGGCGGG	7	+	536	1473
ENSDARG00000010155	ENSDART00000031245	24	7	7	ACATACCGCCGAGCGCCGTCTGT	5	+	937	1473
ENSDARG00000010155	ENSDART00000031245	24	8	8	AGATTCCCCTCACAGGCTTTGTG	5	+	1073	1473
ENSDARG00000010155	ENSDART00000031245	24	9	9	TCCACCTGCAGACTATGAAGACGAA	7	+	1206	1473
ENSDARG00000010155	ENSDART00000031245	24	9	9	TACAGCGACCCCTACGCTGATGGA	6	+	1249	1473
ENSDARG00000010155	ENSDART00000031245	24	9	9	GTCCTACGCTGAGAAGGGTGAGGAT	7	+	1293	1473
ENSDARG00000010155	ENSDART00000031245	24	9	9	GTCCTACGCTGAGAAGGGTGAGGA	6	+	1293	1473
ENSDARG00000010155	ENSDART00000031245	24	9	9	ACCTGCAGACTATGAAGACGAAGAG	7	+	1209	1473
ENSDARG00000010155	ENSDART00000031245	24	9	9	AGCGACCCCTACGCTGATGGAGAC	6	+	1252	1473
ENSDARG00000010169	ENSDART00000011143	24	1	1	GCCGCCACAGTGTTTGTTGGGTT	5	-	97	852
ENSDARG00000010169	ENSDART00000011143	24	1	1	GTCTGCCGCCACAGTGTTTGTTGGG	7	-	99	852
ENSDARG00000010169	ENSDART00000011143	24	1	1	GCCGCCACAGTGTTTGTTGGGTTT	6	-	96	852
ENSDARG00000010169	ENSDART00000011143	24	1	1	TGCCGCCACAGTGTTTGTTGGGTT	6	-	97	852
ENSDARG00000010169	ENSDART00000011143	24	1	1	TGCCGCCACAGTGTTTGTTGGGTTT	7	-	96	852
ENSDARG00000010169	ENSDART00000011143	24	3	3	ACACACAAAGCTTCAGGTTGTATTC	7	-	529	852
ENSDARG00000010169	ENSDART00000011143	24	3	3	ACACAAAGCTTCAGGTTGTATTC	5	-	529	852
ENSDARG00000010169	ENSDART00000011143	24	5	5	GTAGACGACAGGGATTAGCCGTT	5	-	722	852
ENSDARG00000010169	ENSDART00000011143	24	5	5	GGCCTCTTCATGGATTTGTAGAC	5	-	739	852
ENSDARG00000010169	ENSDART00000011143	24	5	5	GAACCAGACCTGTGTGCAGGGTTT	6	-	805	852
ENSDARG00000010169	ENSDART00000011143	24	5	5	AGAACCAGACCTGTGTGCAGGGTTT	7	-	805	852
ENSDARG00000010169	ENSDART00000011143	24	5	5	AACGGCCTCTTCATGGATTTGTAG	6	-	741	852
ENSDARG00000010169	ENSDART00000011143	24	5	5	AACGGCCTCTTCATGGATTTGTA	5	-	742	852
ENSDARG00000010186	ENSDART00000006636	24	5	4	ACCAAAGTCAACCAGCTTGATTC	5	-	497	5325
ENSDARG00000010186	ENSDART00000006636	24	6	5	TCCTCCTTAGTCGGGTGTTTGTG	5	-	534	5325
ENSDARG00000010186	ENSDART00000006636	24	9	8	CTCGGCCCACAATCTGTTTGATGAA	7	-	865	5325
ENSDARG00000010186	ENSDART00000006636	24	9	8	AGCTCCATCAGCTGCTTCTGCAGCG	7	-	896	5325
ENSDARG00000010186	ENSDART00000006636	24	9	8	TCCATCAGCTGCTTCTGCAGCGTCT	7	-	893	5325
ENSDARG00000010186	ENSDART00000006636	24	11	10	GTCGTCACACGTTTGACTTTGAG	5	-	1040	5325
ENSDARG00000010186	ENSDART00000006636	24	11	10	AGCGTCGTCACACGTTTGACTTT	5	-	1043	5325
ENSDARG00000010186	ENSDART00000006636	24	12	11	ACACTCACCTCAGGTGTGTATAA	5	-	1201	5325
ENSDARG00000010186	ENSDART00000006636	24	13	12	TGCCACTGCATATATATGTGGGGGG	7	-	1254	5325
ENSDARG00000010186	ENSDART00000006636	24	13	12	GGCGCCAACATAACTCTTAGTATGC	7	-	1215	5325
ENSDARG00000010186	ENSDART00000006636	24	17	16	GTATACCTCTAGGGTGAAGCCGAT	6	-	1804	5325
ENSDARG00000010186	ENSDART00000006636	24	21	20	TCCAGCAGCGGCCGGTTGTCTTC	5	-	2353	5325
ENSDARG00000010186	ENSDART00000006636	24	21	20	ACATGCCCATGGGCTTCTGAAGGA	6	-	2381	5325
ENSDARG00000010186	ENSDART00000006636	24	22	21	GTTATCCTCAAATTTCTCTGTTTGC	7	-	2454	5325
ENSDARG00000010186	ENSDART00000006636	24	24	23	GCCCACAGCTTTGCCCTTAGTGTGC	7	-	2691	5325
ENSDARG00000010186	ENSDART00000006636	24	30	29	GAACAATCCGGTCAGTGGTCTGC	5	-	3318	5325
ENSDARG00000010186	ENSDART00000006636	24	33	32	TCCTTCCTCTTGGAGTCTTTTAC	5	-	4064	5325
ENSDARG00000010186	ENSDART00000006636	24	33	32	TTCACCTCCTTCCTGTAGCGGTT	5	-	3728	5325
ENSDARG00000010186	ENSDART00000006636	24	33	32	CACTTCCTCATCTTGTTTTTGAG	5	-	4721	5325
ENSDARG00000010186	ENSDART00000006636	24	33	32	GTCTTCTTCTCCTGGTGGATTTTCT	7	-	4209	5325
ENSDARG00000010186	ENSDART00000006636	24	33	32	GTCTTCTTCTCCTGGTGGATTTT	5	-	4211	5325
ENSDARG00000010186	ENSDART00000006636	24	33	32	TCCTCCACATCTCCAGTGCTTTGCC	7	-	4544	5325
ENSDARG00000010186	ENSDART00000006636	24	33	32	CACTTCCTCATCTTGTTTTTGAGAT	7	-	4719	5325
ENSDARG00000010186	ENSDART00000006636	24	33	32	CTCCACATCTCCAGTGCTTTGCC	5	-	4544	5325
ENSDARG00000010186	ENSDART00000006636	24	33	32	CTCGTCTTCTTCTCCTGGTGGATTT	7	-	4212	5325
ENSDARG00000010186	ENSDART00000006636	24	33	32	AGCCTCTAAAATTGCTCTGGATTT	6	-	4667	5325
ENSDARG00000010186	ENSDART00000006636	24	37	36	CTCTTCTCCAATGGGTCTTTGGGG	6	-	5199	5325
ENSDARG00000010186	ENSDART00000006636	24	37	36	CTCTTCTCCAATGGGTCTTTGGG	5	-	5200	5325
ENSDARG00000010186	ENSDART00000006636	24	37	36	CACCTCTTCTCCAATGGGTCTTT	5	-	5203	5325
ENSDARG00000010186	ENSDART00000006636	24	37	36	ACCGGCGTCGTTCATTGGGAAGGC	6	-	5102	5325
ENSDARG00000010186	ENSDART00000006636	24	38	37	GTCGTCGTCTCTGGGAGGTCTTT	5	-	5298	5325
ENSDARG00000010186	ENSDART00000006636	24	38	37	TTAGTCGTCGTCTCTGGGAGGTC	5	-	5301	5325
ENSDARG00000010244	ENSDART00000004535	24	3	3	CCCATCCTCCACAGGGTGAGTGC	5	-	86	381
ENSDARG00000010244	ENSDART00000004535	24	3	3	ATCCCATCCTCCACAGGGTGAGTGC	7	-	86	381
ENSDARG00000010244	ENSDART00000004535	24	3	3	ATCCCATCCTCCACAGGGTGAGTG	6	-	87	381
ENSDARG00000010244	ENSDART00000079984	24	2	2	ATCCCATCCTCCACAGGGTGAGTG	6	-	81	378
ENSDARG00000010244	ENSDART00000079984	24	2	2	ATCCCATCCTCCACAGGGTGAGTGC	7	-	80	378
ENSDARG00000010244	ENSDART00000079984	24	2	2	CCCATCCTCCACAGGGTGAGTGC	5	-	80	378
ENSDARG00000010301	ENSDART00000013343	24	4	4	CTCGCCTTCCAGCGTGGTTTGCA	5	-	460	1143
ENSDARG00000010301	ENSDART00000013343	24	5	5	GCAAACTGCAAGCGTTGGCGTTGGA	7	-	551	1143
ENSDARG00000010301	ENSDART00000013343	24	5	5	AAAGGCAAACTGCAAGCGTTGGCG	6	-	556	1143
ENSDARG00000010301	ENSDART00000013343	24	7	7	CCCAGCCCCAGAATGCATTGGGA	5	-	855	1143
ENSDARG00000010301	ENSDART00000013343	24	7	7	TCCCCAGCCCCAGAATGCATTGGGA	7	-	855	1143
ENSDARG00000010301	ENSDART00000013343	24	8	8	CACTTCTCCTCTGTGGTGATGGG	5	-	971	1143
ENSDARG00000010301	ENSDART00000013343	24	9	9	GTTCAAGCCGTCCAGATGCTGTC	5	-	1037	1143
ENSDARG00000010301	ENSDART00000013343	24	9	9	CAAGCCGTCCAGATGCTGTCGCT	5	-	1034	1143
ENSDARG00000010350	ENSDART00000016879	24	1	1	AAAGACTGCATAAGGTTGCTGTC	5	-	67	516
ENSDARG00000010350	ENSDART00000016879	24	1	1	CACGTCGTCAAACTTAAGCAGCT	5	-	341	516
ENSDARG00000010350	ENSDART00000016879	24	1	1	TCCCGCACCGGGTCTGCTGAGAC	5	-	46	516
ENSDARG00000010516	ENSDART00000002595	24	2	1	AACACCAGAGGCAAGAGGAGGGG	5	+	16	480
ENSDARG00000010516	ENSDART00000002595	24	2	1	AACACCAGAGGCAAGAGGAGGGGGA	7	+	16	480
ENSDARG00000010516	ENSDART00000002595	24	2	1	CCCTTCCGCAAGCATGGTGAGTT	5	+	61	480
ENSDARG00000010555	ENSDART00000018420	24	1	1	GGCACCACCTTTAAGCGCGTTTGCA	7	-	33	1179
ENSDARG00000010555	ENSDART00000018420	24	1	1	ATCACCGTCAGCATGTTCTGCATGC	7	-	8	1179
ENSDARG00000010555	ENSDART00000018420	24	3	3	ACCGTCTGCACCGATGGGCCTTC	5	-	160	1179
ENSDARG00000010555	ENSDART00000018420	24	3	3	GCCTTCGTCCAAACGATGAAGGT	5	-	143	1179
ENSDARG00000010555	ENSDART00000018420	24	4	4	AGACACTCCTCTGGTGTAGGTGTA	6	-	385	1179
ENSDARG00000010555	ENSDART00000018420	24	7	7	GAAGTCTCCTCTTTTGTAGTAGTC	6	-	739	1179
ENSDARG00000010555	ENSDART00000018420	24	8	8	ATCTGCTGCAAACTTGGTTGCTTCT	7	-	807	1179
ENSDARG00000010555	ENSDART00000018420	24	10	10	TGCTGCTAATCATGCGGTCTTTGAG	7	-	976	1179
ENSDARG00000010555	ENSDART00000018420	24	11	11	GCACAAATCTTCCAGCGGCGGCTCT	7	-	1089	1179
ENSDARG00000010555	ENSDART00000018420	24	11	11	GCACAAATCTTCCAGCGGCGGCT	5	-	1091	1179
ENSDARG00000010555	ENSDART00000018420	24	11	11	TTCTTCAACTGATGGATTTGAGTCT	7	-	1171	1179
ENSDARG00000010571	ENSDART00000024722	24	2	1	CTCGTCTGCCCTCCTGAAGCGTTT	6	-	97	2280
ENSDARG00000010571	ENSDART00000024722	24	3	2	GTACGCTCCAATATTTTTTGTCTGT	7	-	143	2280
ENSDARG00000010571	ENSDART00000024722	24	4	3	GGCCACGGCATTCAGTGTTTTGAG	6	-	304	2280
ENSDARG00000010571	ENSDART00000024722	24	5	4	TTCATCACCCATGTATGGGATGTT	6	-	400	2280
ENSDARG00000010571	ENSDART00000024722	24	9	8	TTCTTCCGCTTGTATGTGTTTGGAG	7	-	953	2280
ENSDARG00000010571	ENSDART00000024722	24	9	8	TTCTTCCGCTTGTATGTGTTTGGA	6	-	954	2280
ENSDARG00000010571	ENSDART00000024722	24	10	9	TGCGTCGGCCTGTACTGCGCTTTG	6	-	1097	2280
ENSDARG00000010571	ENSDART00000024722	24	10	9	TCCACCCTCTCGGTCGCTGTCTGT	6	-	1186	2280
ENSDARG00000010571	ENSDART00000024722	24	10	9	TGCTCCACCCTCTCGGTCGCTGTC	6	-	1189	2280
ENSDARG00000010571	ENSDART00000024722	24	12	11	CTCTTCTTCTTTCTTTGAGGAGTGT	7	-	1508	2280
ENSDARG00000010571	ENSDART00000024722	24	12	11	TTCCTCTTCTTCTTTCTTTGAGGAG	7	-	1511	2280
ENSDARG00000010571	ENSDART00000024722	24	15	14	CTCAGCTGCCCCACAGGTGAGGCA	6	-	1804	2280
ENSDARG00000010571	ENSDART00000106089	24	2	1	CTCGTCTGCCCTCCTGAAGCGTTT	6	-	97	309
ENSDARG00000010571	ENSDART00000106089	24	3	2	GTACGCTCCAATATTTTTTGTCTGT	7	-	143	309
ENSDARG00000010571	ENSDART00000106089	24	4	3	TGCAAAGCAGTGACAGTGGCTTTG	6	-	252	309
ENSDARG00000010660	ENSDART00000015894	24	2	2	CCCGTCGTCCCATTGGGGCTGTT	5	-	178	471
ENSDARG00000010660	ENSDART00000015894	24	2	2	TTCCCCGTCGTCCCATTGGGGCTGT	7	-	179	471
ENSDARG00000010660	ENSDART00000015894	24	3	3	CACTCATCCAGTTCCTGACGTTGAG	7	-	334	471
ENSDARG00000010660	ENSDART00000015894	24	5	5	CCCACCAGCACGATATCTGGATTC	6	-	384	471
ENSDARG00000011247	ENSDART00000017427	24	5	4	TCCATCAGAGGAACACTGGGTTGTT	7	-	365	1521
ENSDARG00000011247	ENSDART00000017427	24	6	5	ACACTCAGAAGTGTGTGTGTGATGT	7	-	482	1521
ENSDARG00000011247	ENSDART00000017427	24	6	5	AAATTCCACTTGAAGGAGGAGGAT	6	-	452	1521
ENSDARG00000011247	ENSDART00000017427	24	6	5	AAATTCCACTTGAAGGAGGAGGA	5	-	453	1521
ENSDARG00000011247	ENSDART00000017427	24	7	6	AACTCACCATTGGCGGAGGAGCT	5	-	579	1521
ENSDARG00000011247	ENSDART00000017427	24	7	6	TTCATCTTATTCATCAGGTGAAGAA	7	-	527	1521
ENSDARG00000011247	ENSDART00000017427	24	7	6	CAACTCACCATTGGCGGAGGAGCT	6	-	579	1521
ENSDARG00000011247	ENSDART00000017427	24	10	9	TGCATCTGCGAATGGCAGCTTTT	5	-	974	1521
ENSDARG00000011247	ENSDART00000017427	24	10	9	TGCTCAAACACATCCGCCGGCTGC	6	-	867	1521
ENSDARG00000011247	ENSDART00000017427	24	10	9	AAACACATCCGCCGGCTGCAGGA	5	-	863	1521
ENSDARG00000011247	ENSDART00000017427	24	11	10	GAAACCTCCATCTCTGGTGTGTCT	6	-	1002	1521
ENSDARG00000011247	ENSDART00000017427	24	11	10	AGAAACCTCCATCTCTGGTGTGTCT	7	-	1002	1521
ENSDARG00000011247	ENSDART00000017427	24	11	10	ACCTCCATCTCTGGTGTGTCTAG	5	-	1000	1521
ENSDARG00000011247	ENSDART00000017427	24	13	12	CTCTTCCTCTGAGGAGATGTCGAT	6	-	1300	1521
ENSDARG00000011247	ENSDART00000017427	24	15	14	GTCAGCAGATTCCTGTTTAGGCT	5	-	1484	1521
ENSDARG00000011247	ENSDART00000017427	24	15	14	GTCAGCAGATTCCTGTTTAGGCTTT	7	-	1482	1521
ENSDARG00000011493	ENSDART00000013894	24	1	1	GTTGCCAAATCCTCTGCCGAGGTC	6	+	127	846
ENSDARG00000011493	ENSDART00000013894	24	1	1	GTCTGCACAGGACGGCGACGGAGTC	7	+	237	846
ENSDARG00000011493	ENSDART00000013894	24	1	1	GGCACCAAAGTGTCGGAGGGGAC	5	+	160	846
ENSDARG00000011493	ENSDART00000013894	24	1	1	CTCTGCGTCGATCCGGCTGAGTTC	6	+	355	846
ENSDARG00000011493	ENSDART00000013894	24	1	1	CTCTGCGTCGATCCGGCTGAGTT	5	+	355	846
ENSDARG00000011493	ENSDART00000013894	24	1	1	CCCCACGTCCTCTCTGGGTAGTAA	6	+	39	846
ENSDARG00000011493	ENSDART00000013894	24	1	1	CCCCACGTCCTCTCTGGGTAGTA	5	+	39	846
ENSDARG00000011493	ENSDART00000013894	24	1	1	AAACCCCACGTCCTCTCTGGGTAG	6	+	36	846
ENSDARG00000011493	ENSDART00000013894	24	1	1	AAAACCCCACGTCCTCTCTGGGTAG	7	+	35	846
ENSDARG00000011493	ENSDART00000013894	24	2	2	CTCAGCAACTACAGTGAGGACGAG	6	+	772	846
ENSDARG00000011493	ENSDART00000013894	24	2	2	TCCATCGCCATCGCTCTGTGGAGGC	7	+	610	846
ENSDARG00000011493	ENSDART00000013894	24	2	2	TCCATCGCCATCGCTCTGTGGAG	5	+	610	846
ENSDARG00000011493	ENSDART00000013894	24	2	2	ATCGCCATCGCTCTGTGGAGGCT	5	+	613	846
ENSDARG00000011640	ENSDART00000013117	24	4	3	GTTCTCGCCCTTGTGGCTTGTTT	5	+	229	1248
ENSDARG00000011640	ENSDART00000013117	24	6	5	ACCTGCTTCCAGACAAGAAGAAGAA	7	+	542	1248
ENSDARG00000011640	ENSDART00000013117	24	6	5	GTCAACAGCTGATAGTTGGGATTCT	7	+	455	1248
ENSDARG00000011640	ENSDART00000013117	24	7	6	TCCCTATGCTGAGTTGGGTGGTAA	6	+	633	1248
ENSDARG00000011640	ENSDART00000013117	24	7	6	TCCCTATGCTGAGTTGGGTGGTA	5	+	633	1248
ENSDARG00000011640	ENSDART00000013117	24	7	6	AGCCGCTGCATGAATGGAGGGAAC	6	+	752	1248
ENSDARG00000011640	ENSDART00000013117	24	8	7	GAAGCCAAAAATCTTAAGAAGAT	5	+	874	1248
ENSDARG00000011640	ENSDART00000013117	24	8	7	AGCCAAAAATCTTAAGAAGATGGA	6	+	876	1248
ENSDARG00000011640	ENSDART00000013117	24	9	8	GAAAGCGTCTTAAAAAGAAGAAGAC	7	+	950	1248
ENSDARG00000011640	ENSDART00000013117	24	9	8	AGCGTCTTAAAAAGAAGAAGACGAC	7	+	953	1248
ENSDARG00000011640	ENSDART00000013117	24	10	9	CACTTCAACCAGAAGAGGAGGTGGA	7	+	1208	1248
ENSDARG00000011640	ENSDART00000013117	24	10	9	CACTTCAACCAGAAGAGGAGGTG	5	+	1208	1248
ENSDARG00000011640	ENSDART00000013117	24	10	9	ACACACTTCAACCAGAAGAGGAG	5	+	1205	1248
ENSDARG00000011640	ENSDART00000106360	24	2	2	GTTCTCGCCCTTGTGGCTTGTTT	5	+	211	1248
ENSDARG00000011640	ENSDART00000106360	24	5	5	GTCAACAGCTGATAGTTGGGATTCT	7	+	455	1248
ENSDARG00000011640	ENSDART00000106360	24	5	5	ACCTGCTTCCAGACAAGAAGAAGAA	7	+	542	1248
ENSDARG00000011640	ENSDART00000106360	24	6	6	AGCCGCTGCATGAATGGAGGGAAC	6	+	752	1248
ENSDARG00000011640	ENSDART00000106360	24	6	6	TCCCTATGCTGAGTTGGGTGGTA	5	+	633	1248
ENSDARG00000011640	ENSDART00000106360	24	6	6	TCCCTATGCTGAGTTGGGTGGTAA	6	+	633	1248
ENSDARG00000011640	ENSDART00000106360	24	7	7	GAAGCCAAAAATCTTAAGAAGAT	5	+	874	1248
ENSDARG00000011640	ENSDART00000106360	24	7	7	AGCCAAAAATCTTAAGAAGATGGA	6	+	876	1248
ENSDARG00000011640	ENSDART00000106360	24	8	8	AGCGTCTTAAAAAGAAGAAGACGAC	7	+	953	1248
ENSDARG00000011640	ENSDART00000106360	24	8	8	GAAAGCGTCTTAAAAAGAAGAAGAC	7	+	950	1248
ENSDARG00000011640	ENSDART00000106360	24	9	9	CACTTCAACCAGAAGAGGAGGTGGA	7	+	1208	1248
ENSDARG00000011640	ENSDART00000106360	24	9	9	CACTTCAACCAGAAGAGGAGGTG	5	+	1208	1248
ENSDARG00000011640	ENSDART00000106360	24	9	9	ACACACTTCAACCAGAAGAGGAG	5	+	1205	1248
ENSDARG00000011821	ENSDART00000005901	24	3	3	AAAGCCATCCGTCTCCTGTGTTGCA	7	-	108	2187
ENSDARG00000011821	ENSDART00000005901	24	3	3	ACCTTCACATTGAAGTTGAAGTA	5	-	157	2187
ENSDARG00000011821	ENSDART00000005901	24	5	5	TCCCACTGCGTACAGACGGATAC	5	-	435	2187
ENSDARG00000011821	ENSDART00000005901	24	5	5	AGCTCCACCAGCAAAGATGAGGTC	6	-	319	2187
ENSDARG00000011821	ENSDART00000005901	24	5	5	ACCACCTTATGATTGCTCTGCTGGA	7	-	362	2187
ENSDARG00000011821	ENSDART00000005901	24	6	6	ACAAGCTTCTGTATGTATGGGGC	5	-	493	2187
ENSDARG00000011821	ENSDART00000005901	24	9	9	AGACAAATCCACCATGTCTTGGTC	6	-	823	2187
ENSDARG00000011821	ENSDART00000005901	24	9	9	GACAAATCCACCATGTCTTGGTC	5	-	823	2187
ENSDARG00000011821	ENSDART00000005901	24	10	10	TACGCCAACAGTCACTTGTGGAAAC	7	-	867	2187
ENSDARG00000011821	ENSDART00000005901	24	11	11	CTCTTCCCAGAACTTCTGTATGT	5	-	1010	2187
ENSDARG00000011821	ENSDART00000005901	24	12	12	CACGTCCGCGTCAATGTTGAAGAA	6	-	1147	2187
ENSDARG00000011821	ENSDART00000005901	24	15	15	TCCAAACTCATGCCGATTTGTAA	5	-	1502	2187
ENSDARG00000011821	ENSDART00000005901	24	17	17	TCCACCAGCTCATTGCAGGCTTT	5	-	1705	2187
ENSDARG00000011821	ENSDART00000005901	24	19	19	GAAATCTAAGCCTTTGTTGTTGAG	6	-	2017	2187
ENSDARG00000011821	ENSDART00000106488	24	2	2	AAAGCCATCCGTCTCCTGTGTTGCA	7	-	129	2199
ENSDARG00000011821	ENSDART00000106488	24	2	2	ACCTTCACATTGAAGTTGAAGTA	5	-	178	2199
ENSDARG00000011821	ENSDART00000106488	24	4	4	TCCCACTGCGTACAGACGGATAC	5	-	456	2199
ENSDARG00000011821	ENSDART00000106488	24	4	4	ACCACCTTATGATTGCTCTGCTGGA	7	-	383	2199
ENSDARG00000011821	ENSDART00000106488	24	4	4	AGCTCCACCAGCAAAGATGAGGTC	6	-	340	2199
ENSDARG00000011821	ENSDART00000106488	24	5	5	ACAAGCTTCTGTATGTATGGGGC	5	-	514	2199
ENSDARG00000011821	ENSDART00000106488	24	8	8	AGACAAATCCACCATGTCTTGGTC	6	-	844	2199
ENSDARG00000011821	ENSDART00000106488	24	8	8	GACAAATCCACCATGTCTTGGTC	5	-	844	2199
ENSDARG00000011821	ENSDART00000106488	24	9	9	TACGCCAACAGTCACTTGTGGAAAC	7	-	879	2199
ENSDARG00000011821	ENSDART00000106488	24	10	10	CTCTTCCCAGAACTTCTGTATGT	5	-	1022	2199
ENSDARG00000011821	ENSDART00000106488	24	11	11	CACGTCCGCGTCAATGTTGAAGAA	6	-	1159	2199
ENSDARG00000011821	ENSDART00000106488	24	14	14	TCCAAACTCATGCCGATTTGTAA	5	-	1514	2199
ENSDARG00000011821	ENSDART00000106488	24	16	16	TCCACCAGCTCATTGCAGGCTTT	5	-	1717	2199
ENSDARG00000011821	ENSDART00000106488	24	18	18	GAAATCTAAGCCTTTGTTGTTGAG	6	-	2029	2199
ENSDARG00000012013	ENSDART00000018452	24	3	3	AACCTACCACACCATTTGACTTT	5	-	154	633
ENSDARG00000012013	ENSDART00000018452	24	3	3	ACAACCTACCACACCATTTGACTTT	7	-	154	633
ENSDARG00000012013	ENSDART00000018452	24	4	4	GCCTTCACCCGTTTCTTGTGTTTAC	7	-	263	633
ENSDARG00000012013	ENSDART00000018452	24	5	5	TTACAAAGCGTGGAGGAGGCAGGG	6	-	438	633
ENSDARG00000012013	ENSDART00000018452	24	5	5	ATCTCACGCCATAAGCCGAATAC	5	-	405	633
ENSDARG00000012013	ENSDART00000106188	24	1	1	GACTCACTCGTAGTAGATGTGTTC	6	-	160	1164
ENSDARG00000012013	ENSDART00000106188	24	1	1	CAATCAAGCATGTTGTTCTTTGGAG	7	-	7	1164
ENSDARG00000012013	ENSDART00000106188	24	3	3	ACATCCAACTCTGAATCTGGGGGG	6	-	284	1164
ENSDARG00000012013	ENSDART00000106188	24	3	3	ATCTCAAACATCCAACTCTGAATCT	7	-	290	1164
ENSDARG00000012013	ENSDART00000106188	24	6	6	ACAACCTACCACACCATTTGACTTT	7	-	685	1164
ENSDARG00000012013	ENSDART00000106188	24	6	6	AACCTACCACACCATTTGACTTT	5	-	685	1164
ENSDARG00000012013	ENSDART00000106188	24	7	7	GCCTTCACCCGTTTCTTGTGTTTAC	7	-	794	1164
ENSDARG00000012013	ENSDART00000106188	24	8	8	ATCTCACGCCATAAGCCGAATAC	5	-	936	1164
ENSDARG00000012013	ENSDART00000106188	24	8	8	TTACAAAGCGTGGAGGAGGCAGGG	6	-	969	1164
ENSDARG00000012353	ENSDART00000105769	24	1	1	TGCAAAACACACGCTGTCGATGCT	6	-	94	273
ENSDARG00000012353	ENSDART00000105769	24	1	1	CAAAACACACGCTGTCGATGCTGGG	7	-	91	273
ENSDARG00000012353	ENSDART00000105769	24	1	1	CACTCACCATAGTTGTATTTGTA	5	-	126	273
ENSDARG00000012353	ENSDART00000105769	24	1	1	GCAAAACACACGCTGTCGATGCT	5	-	94	273
ENSDARG00000012353	ENSDART00000105769	24	4	4	AGAGACAGAGGATGGTGCTGCCGGT	7	-	214	273
ENSDARG00000012353	ENSDART00000105770	24	1	1	AGAACCAAACAGTTGACGAGGCT	5	-	19	1323
ENSDARG00000012353	ENSDART00000105770	24	4	4	TGCAAAACACACGCTGTCGATGCT	6	-	328	1323
ENSDARG00000012353	ENSDART00000105770	24	4	4	GCAAAACACACGCTGTCGATGCT	5	-	328	1323
ENSDARG00000012353	ENSDART00000105770	24	4	4	CACTCACCATAGTTGTATTTGTA	5	-	360	1323
ENSDARG00000012353	ENSDART00000105770	24	4	4	CAAAACACACGCTGTCGATGCTGGG	7	-	325	1323
ENSDARG00000012353	ENSDART00000105770	24	5	5	AGAGTCTTCATCACTGTGTAGAA	5	-	382	1323
ENSDARG00000012353	ENSDART00000105770	24	5	5	GTCTTCATCACTGTGTAGAAAAC	5	-	379	1323
ENSDARG00000012353	ENSDART00000105770	24	5	5	AGAGACAGAGGATGGTGCTGCCGGT	7	-	445	1323
ENSDARG00000012353	ENSDART00000105770	24	7	7	ACCAGCAACCAGTAGAAGTTTGC	5	-	655	1323
ENSDARG00000012353	ENSDART00000105770	24	11	11	ATCAGCAGAAGTGTGGACTTGGCT	6	-	990	1323
ENSDARG00000012353	ENSDART00000105770	24	13	13	AACTCCGCCACTTTCTCTTGAGTT	6	-	1172	1323
ENSDARG00000012353	ENSDART00000105770	24	13	13	AAACTCCGCCACTTTCTCTTGAGTT	7	-	1172	1323
ENSDARG00000012388	ENSDART00000007795	24	1	1	GTACTCAAATAAATGCAGCTTTG	5	+	32	504
ENSDARG00000012388	ENSDART00000007795	24	1	1	CTCAAATAAATGCAGCTTTGGAGAA	7	+	35	504
ENSDARG00000012388	ENSDART00000007795	24	1	1	CTCAAATAAATGCAGCTTTGGAG	5	+	35	504
ENSDARG00000012388	ENSDART00000007795	24	2	2	CAACTCAGCAAGGAGGAGAAGCT	5	+	223	504
ENSDARG00000012388	ENSDART00000007795	24	2	2	ACCCAACTCAGCAAGGAGGAGAA	5	+	220	504
ENSDARG00000012388	ENSDART00000007795	24	2	2	AAACTCAAAGAGAAGGAGAAGGG	5	+	190	504
ENSDARG00000012388	ENSDART00000007795	24	3	3	AGACTCACACATGAGCTGTCGTT	5	+	256	504
ENSDARG00000012388	ENSDART00000007795	24	3	3	GGCTCCAAAGAATGGATGACTGT	5	+	295	504
ENSDARG00000012388	ENSDART00000105691	24	1	1	GGCTGCACACACTCATGGTGAAAAC	7	+	81	513
ENSDARG00000012388	ENSDART00000105691	24	1	1	AACTTCATCTGGAATCTGGGCTGCA	7	+	63	513
ENSDARG00000012388	ENSDART00000105691	24	2	2	ACCCAACTCAGCAAGGAGGAGAA	5	+	229	513
ENSDARG00000012388	ENSDART00000105691	24	2	2	CAACTCAGCAAGGAGGAGAAGCT	5	+	232	513
ENSDARG00000012388	ENSDART00000105691	24	2	2	AAACTCAAAGAGAAGGAGAAGGG	5	+	199	513
ENSDARG00000012388	ENSDART00000105691	24	3	3	AGACTCACACATGAGCTGTCGTT	5	+	265	513
ENSDARG00000012388	ENSDART00000105691	24	3	3	GGCTCCAAAGAATGGATGACTGT	5	+	304	513
ENSDARG00000012552	ENSDART00000021095	24	6	5	ATCCAAACAAAGTGTGGTTTGGGA	6	+	626	2313
ENSDARG00000012552	ENSDART00000021095	24	6	5	ATCCAAACAAAGTGTGGTTTGGG	5	+	626	2313
ENSDARG00000012552	ENSDART00000021095	24	6	5	CAATCCAAACAAAGTGTGGTTTG	5	+	624	2313
ENSDARG00000012552	ENSDART00000021095	24	6	5	CAATCCAAACAAAGTGTGGTTTGGG	7	+	624	2313
ENSDARG00000012552	ENSDART00000021095	24	6	5	CTCCAATCCAAACAAAGTGTGGTTT	7	+	621	2313
ENSDARG00000012552	ENSDART00000021095	24	6	5	ATCCAAACAAAGTGTGGTTTGGGAA	7	+	626	2313
ENSDARG00000012552	ENSDART00000021095	24	7	6	GTATACGCCAATTATGGTGAGCC	5	+	718	2313
ENSDARG00000012552	ENSDART00000021095	24	11	10	GCACTACTCTTCTAATGGAGCTTGC	7	+	1292	2313
ENSDARG00000012552	ENSDART00000021095	24	11	10	CTCTTCTAATGGAGCTTGCGAGGGT	7	+	1298	2313
ENSDARG00000012552	ENSDART00000021095	24	12	11	GTTTCAAACCCAAGAGAAGCATTG	6	+	1346	2313
ENSDARG00000012552	ENSDART00000021095	24	12	11	TTCAAACCCAAGAGAAGCATTGTGT	7	+	1348	2313
ENSDARG00000012552	ENSDART00000021095	24	13	12	ACCTACATCAGTTTGGATGGTGTT	6	+	1462	2313
ENSDARG00000012552	ENSDART00000021095	24	13	12	ACCTACATCAGTTTGGATGGTGT	5	+	1462	2313
ENSDARG00000012552	ENSDART00000021095	24	14	13	AGCATCTGCCAGTCCTTTGTTGCA	6	+	1509	2313
ENSDARG00000012552	ENSDART00000021095	24	15	14	ACATGCAGATGGATGATGGTGCA	5	+	1613	2313
ENSDARG00000012552	ENSDART00000105807	24	3	3	CAATCCAAACAAAGTGTGGTTTG	5	+	369	2067
ENSDARG00000012552	ENSDART00000105807	24	3	3	ATCCAAACAAAGTGTGGTTTGGGAA	7	+	371	2067
ENSDARG00000012552	ENSDART00000105807	24	3	3	ATCCAAACAAAGTGTGGTTTGGGA	6	+	371	2067
ENSDARG00000012552	ENSDART00000105807	24	3	3	ATCCAAACAAAGTGTGGTTTGGG	5	+	371	2067
ENSDARG00000012552	ENSDART00000105807	24	3	3	CTCCAATCCAAACAAAGTGTGGTTT	7	+	366	2067
ENSDARG00000012552	ENSDART00000105807	24	3	3	CAATCCAAACAAAGTGTGGTTTGGG	7	+	369	2067
ENSDARG00000012552	ENSDART00000105807	24	4	4	GTATACGCCAATTATGGTGAGCC	5	+	463	2067
ENSDARG00000012552	ENSDART00000105807	24	9	9	GCACTACTCTTCTAATGGAGCTTGC	7	+	1070	2067
ENSDARG00000012552	ENSDART00000105807	24	9	9	CTCTTCTAATGGAGCTTGCGAGGGT	7	+	1076	2067
ENSDARG00000012552	ENSDART00000105807	24	10	10	TTCAAACCCAAGAGAAGCATTGTGT	7	+	1126	2067
ENSDARG00000012552	ENSDART00000105807	24	10	10	GTTTCAAACCCAAGAGAAGCATTG	6	+	1124	2067
ENSDARG00000012552	ENSDART00000105807	24	11	11	ACCTACATCAGTTTGGATGGTGTT	6	+	1240	2067
ENSDARG00000012552	ENSDART00000105807	24	11	11	ACCTACATCAGTTTGGATGGTGT	5	+	1240	2067
ENSDARG00000012552	ENSDART00000105807	24	12	12	AGCATCTGCCAGTCCTTTGTTGCA	6	+	1287	2067
ENSDARG00000012552	ENSDART00000105807	24	13	13	ACATGCAGATGGATGATGGTGCA	5	+	1391	2067
ENSDARG00000012552	ENSDART00000105809	24	4	4	CAAGTCTTCTTATGGTTTTTGTT	5	+	221	2295
ENSDARG00000012552	ENSDART00000105809	24	6	6	CAATCCAAACAAAGTGTGGTTTGGG	7	+	603	2295
ENSDARG00000012552	ENSDART00000105809	24	6	6	CAATCCAAACAAAGTGTGGTTTG	5	+	603	2295
ENSDARG00000012552	ENSDART00000105809	24	6	6	ATCCAAACAAAGTGTGGTTTGGGAA	7	+	605	2295
ENSDARG00000012552	ENSDART00000105809	24	6	6	ATCCAAACAAAGTGTGGTTTGGGA	6	+	605	2295
ENSDARG00000012552	ENSDART00000105809	24	6	6	ATCCAAACAAAGTGTGGTTTGGG	5	+	605	2295
ENSDARG00000012552	ENSDART00000105809	24	6	6	CTCCAATCCAAACAAAGTGTGGTTT	7	+	600	2295
ENSDARG00000012552	ENSDART00000105809	24	7	7	GTATACGCCAATTATGGTGAGCC	5	+	697	2295
ENSDARG00000012552	ENSDART00000105809	24	11	11	CTCTTCTAATGGAGCTTGCGAGGGT	7	+	1277	2295
ENSDARG00000012552	ENSDART00000105809	24	11	11	GCACTACTCTTCTAATGGAGCTTGC	7	+	1271	2295
ENSDARG00000012552	ENSDART00000105809	24	12	12	TTCAAACCCAAGAGAAGCATTGTGT	7	+	1330	2295
ENSDARG00000012552	ENSDART00000105809	24	12	12	GTTTCAAACCCAAGAGAAGCATTG	6	+	1328	2295
ENSDARG00000012552	ENSDART00000105809	24	13	13	ACCTACATCAGTTTGGATGGTGTT	6	+	1444	2295
ENSDARG00000012552	ENSDART00000105809	24	13	13	ACCTACATCAGTTTGGATGGTGT	5	+	1444	2295
ENSDARG00000012552	ENSDART00000105809	24	14	14	AGCATCTGCCAGTCCTTTGTTGCA	6	+	1491	2295
ENSDARG00000012552	ENSDART00000105809	24	15	15	ACATGCAGATGGATGATGGTGCA	5	+	1595	2295
ENSDARG00000012625	ENSDART00000009613	24	2	2	AGCTCCAAACTTGTGGTCTTTGAC	6	+	115	990
ENSDARG00000012625	ENSDART00000009613	24	2	2	ACCAGCTCCAAACTTGTGGTCTTT	6	+	112	990
ENSDARG00000012625	ENSDART00000009613	24	3	3	AGCCGCCCCTCTGTGGGAGACTAA	6	+	192	990
ENSDARG00000012625	ENSDART00000009613	24	3	3	AGAAACAGAGTTTTGTGGGTGAGTA	7	+	215	990
ENSDARG00000012625	ENSDART00000009613	24	3	3	AGAAACAGAGTTTTGTGGGTGAG	5	+	215	990
ENSDARG00000012625	ENSDART00000009613	24	8	8	AAAGCCCGCCTTTATGAAGCAGAC	6	+	534	990
ENSDARG00000012642	ENSDART00000025129	24	4	4	GGCTTCTCCTCCGTATGATGCGTGC	7	-	497	2496
ENSDARG00000012642	ENSDART00000025129	24	4	4	GTTTACATCTTGACTGAAGTGTTT	6	-	457	2496
ENSDARG00000012642	ENSDART00000025129	24	4	4	TACGGCTTCTCCTCCGTATGATGC	6	-	501	2496
ENSDARG00000012642	ENSDART00000025129	24	4	4	TACGGCTTCTCTCCGGTGTGGAC	5	-	415	2496
ENSDARG00000012642	ENSDART00000025129	24	5	5	AACGGCCTCTCGTCGGTGTGAGTGC	7	-	671	2496
ENSDARG00000012642	ENSDART00000025129	24	5	5	AACGGCCTCTCGTCGGTGTGAGTG	6	-	672	2496
ENSDARG00000012642	ENSDART00000025129	24	5	5	AGAAGCGTCTGCAGCAGACGAAGCA	7	-	784	2496
ENSDARG00000012642	ENSDART00000025129	24	5	5	TTCCGCAGAACGGACAGGTGAAGCG	7	-	607	2496
ENSDARG00000012642	ENSDART00000025129	24	5	5	AGCGTCTGCAGCAGACGAAGCATTC	7	-	781	2496
ENSDARG00000012642	ENSDART00000025129	24	10	10	AGCACCTTCCTTAGATTTATAGGTT	7	-	1215	2496
ENSDARG00000012642	ENSDART00000025129	24	11	11	GACACCTCCAAATTCTTTTGGTTAG	7	-	1258	2496
ENSDARG00000012642	ENSDART00000025129	24	11	11	CACGACACCTCCAAATTCTTTTGGT	7	-	1261	2496
ENSDARG00000012642	ENSDART00000025129	24	11	11	ACCTCCAAATTCTTTTGGTTAGGTG	7	-	1255	2496
ENSDARG00000012642	ENSDART00000025129	24	11	11	TCCAAATTCTTTTGGTTAGGTGAA	6	-	1253	2496
ENSDARG00000012642	ENSDART00000025129	24	12	12	CACATCCACGTGCTGATCTGTTTAA	7	-	1302	2496
ENSDARG00000012642	ENSDART00000025129	24	12	12	TCCTCCCGCAGTAAGAGCAGGCGAA	7	-	1339	2496
ENSDARG00000012642	ENSDART00000025129	24	12	12	ACCACCAGAGCCGAGCGCTGCCGGA	7	-	1451	2496
ENSDARG00000012642	ENSDART00000025129	24	12	12	AAACCCTTAGAGCAGATGGGGCA	5	-	1597	2496
ENSDARG00000012642	ENSDART00000025129	24	13	13	CACTCAAACGGCTTTTCTTGAGAG	6	-	1656	2496
ENSDARG00000012642	ENSDART00000025129	24	13	13	GCACTCAAACGGCTTTTCTTGAGAG	7	-	1656	2496
ENSDARG00000012642	ENSDART00000025129	24	14	14	AGACACAAACTGCATGTGTGGGAG	6	-	1920	2496
ENSDARG00000012642	ENSDART00000025129	24	14	14	AGACACAAACTGCATGTGTGGGA	5	-	1921	2496
ENSDARG00000012642	ENSDART00000027294	24	2	2	TACGGCTTCTCTCCGGTGTGGAC	5	-	181	1662
ENSDARG00000012642	ENSDART00000027294	24	2	2	TACGGCTTCTCCTCCGTATGATGC	6	-	267	1662
ENSDARG00000012642	ENSDART00000027294	24	2	2	GTTTACATCTTGACTGAAGTGTTT	6	-	223	1662
ENSDARG00000012642	ENSDART00000027294	24	2	2	GGCTTCTCCTCCGTATGATGCGTGC	7	-	263	1662
ENSDARG00000012642	ENSDART00000027294	24	3	3	AGAAGCGTCTGCAGCAGACGAAGCA	7	-	550	1662
ENSDARG00000012642	ENSDART00000027294	24	3	3	TTCCGCAGAACGGACAGGTGAAGCG	7	-	373	1662
ENSDARG00000012642	ENSDART00000027294	24	3	3	AACGGCCTCTCGTCGGTGTGAGTG	6	-	438	1662
ENSDARG00000012642	ENSDART00000027294	24	3	3	AACGGCCTCTCGTCGGTGTGAGTGC	7	-	437	1662
ENSDARG00000012642	ENSDART00000027294	24	3	3	AGCGTCTGCAGCAGACGAAGCATTC	7	-	547	1662
ENSDARG00000012642	ENSDART00000027294	24	4	4	ACCACCAGAGCCGAGCGCTGCCGGA	7	-	833	1662
ENSDARG00000012642	ENSDART00000027294	24	4	4	AAACCCTTAGAGCAGATGGGGCA	5	-	979	1662
ENSDARG00000012642	ENSDART00000027294	24	4	4	TCCTCCCGCAGTAAGAGCAGGCGAA	7	-	721	1662
ENSDARG00000012642	ENSDART00000027294	24	6	6	GCACTCAAACGGCTTTTCTTGAGAG	7	-	1044	1662
ENSDARG00000012642	ENSDART00000027294	24	6	6	CACTCAAACGGCTTTTCTTGAGAG	6	-	1044	1662
ENSDARG00000012642	ENSDART00000066844	24	2	2	TACGGCTTCTCCTCCGTATGATGC	6	-	321	2367
ENSDARG00000012642	ENSDART00000066844	24	2	2	TACGGCTTCTCTCCGGTGTGGAC	5	-	235	2367
ENSDARG00000012642	ENSDART00000066844	24	2	2	GTTTACATCTTGACTGAAGTGTTT	6	-	277	2367
ENSDARG00000012642	ENSDART00000066844	24	2	2	GGCTTCTCCTCCGTATGATGCGTGC	7	-	317	2367
ENSDARG00000012642	ENSDART00000066844	24	3	3	AACGGCCTCTCGTCGGTGTGAGTGC	7	-	491	2367
ENSDARG00000012642	ENSDART00000066844	24	3	3	AGAAGCGTCTGCAGCAGACGAAGCA	7	-	604	2367
ENSDARG00000012642	ENSDART00000066844	24	3	3	AGCGTCTGCAGCAGACGAAGCATTC	7	-	601	2367
ENSDARG00000012642	ENSDART00000066844	24	3	3	AACGGCCTCTCGTCGGTGTGAGTG	6	-	492	2367
ENSDARG00000012642	ENSDART00000066844	24	3	3	TTCCGCAGAACGGACAGGTGAAGCG	7	-	427	2367
ENSDARG00000012642	ENSDART00000066844	24	9	9	TCCTCCCGCAGTAAGAGCAGGCGAA	7	-	1096	2367
ENSDARG00000012642	ENSDART00000066844	24	9	9	CACATCCACGTGCTGATCTGTTTAA	7	-	1059	2367
ENSDARG00000012642	ENSDART00000066844	24	9	9	AAACCCTTAGAGCAGATGGGGCA	5	-	1354	2367
ENSDARG00000012642	ENSDART00000066844	24	9	9	ACCACCAGAGCCGAGCGCTGCCGGA	7	-	1208	2367
ENSDARG00000012642	ENSDART00000066844	24	12	12	GCACTCAAACGGCTTTTCTTGAGAG	7	-	1503	2367
ENSDARG00000012642	ENSDART00000066844	24	12	12	CACTCAAACGGCTTTTCTTGAGAG	6	-	1503	2367
ENSDARG00000012642	ENSDART00000066844	24	14	14	AGACACAAACTGCATGTGTGGGA	5	-	1777	2367
ENSDARG00000012642	ENSDART00000066844	24	14	14	AGACACAAACTGCATGTGTGGGAG	6	-	1776	2367
ENSDARG00000012642	ENSDART00000066845	24	2	2	TACGGCTTCTCTCCGGTGTGGAC	5	-	175	2067
ENSDARG00000012642	ENSDART00000066845	24	2	2	TACGGCTTCTCCTCCGTATGATGC	6	-	261	2067
ENSDARG00000012642	ENSDART00000066845	24	2	2	GTTTACATCTTGACTGAAGTGTTT	6	-	217	2067
ENSDARG00000012642	ENSDART00000066845	24	2	2	GGCTTCTCCTCCGTATGATGCGTGC	7	-	257	2067
ENSDARG00000012642	ENSDART00000066845	24	3	3	TTCCGCAGAACGGACAGGTGAAGCG	7	-	367	2067
ENSDARG00000012642	ENSDART00000066845	24	3	3	AGCGTCTGCAGCAGACGAAGCATTC	7	-	541	2067
ENSDARG00000012642	ENSDART00000066845	24	3	3	AACGGCCTCTCGTCGGTGTGAGTG	6	-	432	2067
ENSDARG00000012642	ENSDART00000066845	24	3	3	AGAAGCGTCTGCAGCAGACGAAGCA	7	-	544	2067
ENSDARG00000012642	ENSDART00000066845	24	3	3	AACGGCCTCTCGTCGGTGTGAGTGC	7	-	431	2067
ENSDARG00000012642	ENSDART00000066845	24	5	5	AAACCCTTAGAGCAGATGGGGCA	5	-	1141	2067
ENSDARG00000012642	ENSDART00000066845	24	5	5	CACATCCACGTGCTGATCTGTTTAA	7	-	846	2067
ENSDARG00000012642	ENSDART00000066845	24	5	5	ACCACCAGAGCCGAGCGCTGCCGGA	7	-	995	2067
ENSDARG00000012642	ENSDART00000066845	24	5	5	TCCTCCCGCAGTAAGAGCAGGCGAA	7	-	883	2067
ENSDARG00000012642	ENSDART00000066845	24	7	7	GCACTCAAACGGCTTTTCTTGAGAG	7	-	1206	2067
ENSDARG00000012642	ENSDART00000066845	24	7	7	CACTCAAACGGCTTTTCTTGAGAG	6	-	1206	2067
ENSDARG00000012642	ENSDART00000066845	24	10	10	AGACACAAACTGCATGTGTGGGAG	6	-	1488	2067
ENSDARG00000012642	ENSDART00000066845	24	10	10	AGACACAAACTGCATGTGTGGGA	5	-	1489	2067
ENSDARG00000012642	ENSDART00000066846	24	1	1	TACGGCTTCTCTCCGGTGTGGAC	5	-	112	1653
ENSDARG00000012642	ENSDART00000066846	24	2	2	AGCGTCTGCAGCAGACGAAGCATTC	7	-	304	1653
ENSDARG00000012642	ENSDART00000066846	24	2	2	AGAAGCGTCTGCAGCAGACGAAGCA	7	-	307	1653
ENSDARG00000012642	ENSDART00000066846	24	2	2	AACGGCCTCTCGTCGGTGTGAGTGC	7	-	194	1653
ENSDARG00000012642	ENSDART00000066846	24	2	2	AACGGCCTCTCGTCGGTGTGAGTG	6	-	195	1653
ENSDARG00000012642	ENSDART00000066846	24	4	4	ACCACCAGAGCCGAGCGCTGCCGGA	7	-	665	1653
ENSDARG00000012642	ENSDART00000066846	24	4	4	CACATCCACGTGCTGATCTGTTTAA	7	-	516	1653
ENSDARG00000012642	ENSDART00000066846	24	4	4	TCCTCCCGCAGTAAGAGCAGGCGAA	7	-	553	1653
ENSDARG00000012642	ENSDART00000066846	24	4	4	AAACCCTTAGAGCAGATGGGGCA	5	-	811	1653
ENSDARG00000012642	ENSDART00000066846	24	6	6	GCACTCAAACGGCTTTTCTTGAGAG	7	-	873	1653
ENSDARG00000012642	ENSDART00000066846	24	6	6	CACTCAAACGGCTTTTCTTGAGAG	6	-	873	1653
ENSDARG00000012642	ENSDART00000066847	24	3	3	GTTTACATCTTGACTGAAGTGTTT	6	-	361	2013
ENSDARG00000012642	ENSDART00000066847	24	3	3	GGCTTCTCCTCCGTATGATGCGTGC	7	-	401	2013
ENSDARG00000012642	ENSDART00000066847	24	3	3	TACGGCTTCTCTCCGGTGTGGAC	5	-	319	2013
ENSDARG00000012642	ENSDART00000066847	24	3	3	TACGGCTTCTCCTCCGTATGATGC	6	-	405	2013
ENSDARG00000012642	ENSDART00000066847	24	3	3	AAACTCTTCATCTGGAGGAGCGTAC	7	-	195	2013
ENSDARG00000012642	ENSDART00000066847	24	4	4	AACGGCCTCTCGTCGGTGTGAGTGC	7	-	575	2013
ENSDARG00000012642	ENSDART00000066847	24	4	4	AACGGCCTCTCGTCGGTGTGAGTG	6	-	576	2013
ENSDARG00000012642	ENSDART00000066847	24	4	4	AGCGTCTGCAGCAGACGAAGCATTC	7	-	685	2013
ENSDARG00000012642	ENSDART00000066847	24	4	4	TTCCGCAGAACGGACAGGTGAAGCG	7	-	511	2013
ENSDARG00000012642	ENSDART00000066847	24	4	4	AGAAGCGTCTGCAGCAGACGAAGCA	7	-	688	2013
ENSDARG00000012642	ENSDART00000066847	24	5	5	TCCTCCCGCAGTAAGAGCAGGCGAA	7	-	859	2013
ENSDARG00000012642	ENSDART00000066847	24	5	5	AAACCCTTAGAGCAGATGGGGCA	5	-	1117	2013
ENSDARG00000012642	ENSDART00000066847	24	5	5	ACCACCAGAGCCGAGCGCTGCCGGA	7	-	971	2013
ENSDARG00000012642	ENSDART00000066847	24	7	7	CACTCAAACGGCTTTTCTTGAGAG	6	-	1179	2013
ENSDARG00000012642	ENSDART00000066847	24	7	7	GCACTCAAACGGCTTTTCTTGAGAG	7	-	1179	2013
ENSDARG00000012642	ENSDART00000066847	24	8	8	AGACACAAACTGCATGTGTGGGAG	6	-	1443	2013
ENSDARG00000012642	ENSDART00000066847	24	8	8	AGACACAAACTGCATGTGTGGGA	5	-	1444	2013
ENSDARG00000012642	ENSDART00000066848	24	2	2	TACGGCTTCTCTCCGGTGTGGAC	5	-	187	1575
ENSDARG00000012642	ENSDART00000066848	24	2	2	TACGGCTTCTCCTCCGTATGATGC	6	-	273	1575
ENSDARG00000012642	ENSDART00000066848	24	2	2	GTTTACATCTTGACTGAAGTGTTT	6	-	229	1575
ENSDARG00000012642	ENSDART00000066848	24	2	2	GGCTTCTCCTCCGTATGATGCGTGC	7	-	269	1575
ENSDARG00000012642	ENSDART00000066848	24	3	3	AGAAGCGTCTGCAGCAGACGAAGCA	7	-	556	1575
ENSDARG00000012642	ENSDART00000066848	24	3	3	TTCCGCAGAACGGACAGGTGAAGCG	7	-	379	1575
ENSDARG00000012642	ENSDART00000066848	24	3	3	AACGGCCTCTCGTCGGTGTGAGTG	6	-	444	1575
ENSDARG00000012642	ENSDART00000066848	24	3	3	AACGGCCTCTCGTCGGTGTGAGTGC	7	-	443	1575
ENSDARG00000012642	ENSDART00000066848	24	3	3	AGCGTCTGCAGCAGACGAAGCATTC	7	-	553	1575
ENSDARG00000012642	ENSDART00000066848	24	4	4	ACCACCAGAGCCGAGCGCTGCCGGA	7	-	749	1575
ENSDARG00000012642	ENSDART00000066848	24	4	4	AAACCCTTAGAGCAGATGGGGCA	5	-	895	1575
ENSDARG00000012642	ENSDART00000066848	24	6	6	GCACTCAAACGGCTTTTCTTGAGAG	7	-	960	1575
ENSDARG00000012642	ENSDART00000066848	24	6	6	CACTCAAACGGCTTTTCTTGAGAG	6	-	960	1575
ENSDARG00000012642	ENSDART00000082513	24	3	3	AAAAGCAGAAATGTGGAGGGAGAT	6	-	287	1893
ENSDARG00000012642	ENSDART00000082513	24	4	4	GTTTACATCTTGACTGAAGTGTTT	6	-	487	1893
ENSDARG00000012642	ENSDART00000082513	24	4	4	TACGGCTTCTCCTCCGTATGATGC	6	-	531	1893
ENSDARG00000012642	ENSDART00000082513	24	4	4	TACGGCTTCTCTCCGGTGTGGAC	5	-	445	1893
ENSDARG00000012642	ENSDART00000082513	24	4	4	AAACTCTTCATCTGGAGGAGCGTAC	7	-	321	1893
ENSDARG00000012642	ENSDART00000082513	24	4	4	GGCTTCTCCTCCGTATGATGCGTGC	7	-	527	1893
ENSDARG00000012642	ENSDART00000082513	24	5	5	TTCCGCAGAACGGACAGGTGAAGCG	7	-	637	1893
ENSDARG00000012642	ENSDART00000082513	24	5	5	AACGGCCTCTCGTCGGTGTGAGTG	6	-	702	1893
ENSDARG00000012642	ENSDART00000082513	24	5	5	AGCGTCTGCAGCAGACGAAGCATTC	7	-	811	1893
ENSDARG00000012642	ENSDART00000082513	24	5	5	AGAAGCGTCTGCAGCAGACGAAGCA	7	-	814	1893
ENSDARG00000012642	ENSDART00000082513	24	5	5	AACGGCCTCTCGTCGGTGTGAGTGC	7	-	701	1893
ENSDARG00000012642	ENSDART00000082513	24	6	6	ACCACCAGAGCCGAGCGCTGCCGGA	7	-	1007	1893
ENSDARG00000012642	ENSDART00000082513	24	7	7	CACTCAAACGGCTTTTCTTGAGAG	6	-	1131	1893
ENSDARG00000012642	ENSDART00000082513	24	7	7	GCACTCAAACGGCTTTTCTTGAGAG	7	-	1131	1893
ENSDARG00000012642	ENSDART00000106569	24	1	1	TACGGCTTCTCTCCGGTGTGGAC	5	-	109	1887
ENSDARG00000012642	ENSDART00000106569	24	1	1	TACGGCTTCTCCTCCGTATGATGC	6	-	195	1887
ENSDARG00000012642	ENSDART00000106569	24	1	1	GTTTACATCTTGACTGAAGTGTTT	6	-	151	1887
ENSDARG00000012642	ENSDART00000106569	24	1	1	GGCTTCTCCTCCGTATGATGCGTGC	7	-	191	1887
ENSDARG00000012642	ENSDART00000106569	24	2	2	TTCCGCAGAACGGACAGGTGAAGCG	7	-	301	1887
ENSDARG00000012642	ENSDART00000106569	24	2	2	AACGGCCTCTCGTCGGTGTGAGTG	6	-	366	1887
ENSDARG00000012642	ENSDART00000106569	24	2	2	AGCGTCTGCAGCAGACGAAGCATTC	7	-	475	1887
ENSDARG00000012642	ENSDART00000106569	24	2	2	AGAAGCGTCTGCAGCAGACGAAGCA	7	-	478	1887
ENSDARG00000012642	ENSDART00000106569	24	2	2	AACGGCCTCTCGTCGGTGTGAGTGC	7	-	365	1887
ENSDARG00000012642	ENSDART00000106569	24	6	6	CACATCCACGTGCTGATCTGTTTAA	7	-	768	1887
ENSDARG00000012642	ENSDART00000106569	24	6	6	TCCTCCCGCAGTAAGAGCAGGCGAA	7	-	805	1887
ENSDARG00000012642	ENSDART00000106569	24	6	6	ACCACCAGAGCCGAGCGCTGCCGGA	7	-	917	1887
ENSDARG00000012642	ENSDART00000106569	24	7	7	GCACTCAAACGGCTTTTCTTGAGAG	7	-	1041	1887
ENSDARG00000012642	ENSDART00000106569	24	7	7	CACTCAAACGGCTTTTCTTGAGAG	6	-	1041	1887
ENSDARG00000012642	ENSDART00000106574	24	1	1	TACGGCTTCTCTCCGGTGTGGAC	5	-	100	1308
ENSDARG00000012642	ENSDART00000106574	24	3	3	AACGGCCTCTCGTCGGTGTGAGTGC	7	-	269	1308
ENSDARG00000012642	ENSDART00000106574	24	3	3	AACGGCCTCTCGTCGGTGTGAGTG	6	-	270	1308
ENSDARG00000012642	ENSDART00000106574	24	3	3	AGAAGCGTCTGCAGCAGACGAAGCA	7	-	382	1308
ENSDARG00000012642	ENSDART00000106574	24	3	3	AGCGTCTGCAGCAGACGAAGCATTC	7	-	379	1308
ENSDARG00000012642	ENSDART00000106574	24	3	3	TTCCGCAGAACGGACAGGTGAAGCG	7	-	205	1308
ENSDARG00000012642	ENSDART00000106574	24	4	4	TCCTCCCGCAGTAAGAGCAGGCGAA	7	-	553	1308
ENSDARG00000012642	ENSDART00000106574	24	4	4	ACCACCAGAGCCGAGCGCTGCCGGA	7	-	665	1308
ENSDARG00000012642	ENSDART00000106574	24	5	5	GCACTCAAACGGCTTTTCTTGAGAG	7	-	789	1308
ENSDARG00000012642	ENSDART00000106574	24	5	5	CACTCAAACGGCTTTTCTTGAGAG	6	-	789	1308
ENSDARG00000012671	ENSDART00000004241	24	1	1	GACGGCAGCGTCCTGATTGAGGA	5	+	355	1221
ENSDARG00000012671	ENSDART00000004241	24	1	1	AGCCCAGCAAGATGTGGTGGAGGCA	7	+	210	1221
ENSDARG00000012671	ENSDART00000004241	24	1	1	AGCCCAGCAAGATGTGGTGGAGGC	6	+	210	1221
ENSDARG00000012671	ENSDART00000004241	24	1	1	GGCAGCGTCCTGATTGAGGACGAG	6	+	358	1221
ENSDARG00000012671	ENSDART00000004241	24	3	3	TGCTTCTGCAGCAGGGCGCAGGG	5	+	596	1221
ENSDARG00000012671	ENSDART00000004241	24	3	3	TACCACGCCAACTACTGCGAAGGC	6	+	985	1221
ENSDARG00000012671	ENSDART00000004241	24	3	3	GTCTCCTGCCCGCTGTGCGCCGAC	6	+	736	1221
ENSDARG00000012671	ENSDART00000004241	24	3	3	GTACCACGCCAACTACTGCGAAGGC	7	+	984	1221
ENSDARG00000012671	ENSDART00000004241	24	3	3	TTCTGCAGCAGGGCGCAGGGGAG	5	+	599	1221
ENSDARG00000012671	ENSDART00000004241	24	3	3	GCCAACTACTGCGAAGGCGACTGC	6	+	991	1221
ENSDARG00000012671	ENSDART00000004241	24	3	3	CTCTACTACAACGAGGAGCAGAA	5	+	1156	1221
ENSDARG00000012671	ENSDART00000004241	24	3	3	CTCATCTCCAAGGAAGGCGGTGAG	6	+	487	1221
ENSDARG00000012671	ENSDART00000004241	24	3	3	CACGCCAACTACTGCGAAGGCGAC	6	+	988	1221
ENSDARG00000012671	ENSDART00000004241	24	3	3	ACATTCGGCTGCTTCTGCAGCAGGG	7	+	587	1221
ENSDARG00000012671	ENSDART00000004241	24	3	3	AACGTCAACATTCGGCTGCTTCT	5	+	580	1221
ENSDARG00000012671	ENSDART00000093251	24	1	1	GACGGCAGCGTCCTGATTGAGGA	5	+	334	1185
ENSDARG00000012671	ENSDART00000093251	24	1	1	AGCCCAGCAAGATGTGGTGGAGGCA	7	+	189	1185
ENSDARG00000012671	ENSDART00000093251	24	1	1	AGCCCAGCAAGATGTGGTGGAGGC	6	+	189	1185
ENSDARG00000012671	ENSDART00000093251	24	1	1	GGCAGCGTCCTGATTGAGGACGAG	6	+	337	1185
ENSDARG00000012671	ENSDART00000093251	24	2	2	TACCACGCCAACTACTGCGAAGGC	6	+	949	1185
ENSDARG00000012671	ENSDART00000093251	24	2	2	GTCTCCTGCCCGCTGTGCGCCGAC	6	+	700	1185
ENSDARG00000012671	ENSDART00000093251	24	2	2	GTACCACGCCAACTACTGCGAAGGC	7	+	948	1185
ENSDARG00000012671	ENSDART00000093251	24	2	2	TTCTGCAGCAGGGCGCAGGGGAG	5	+	563	1185
ENSDARG00000012671	ENSDART00000093251	24	2	2	TGCTTCTGCAGCAGGGCGCAGGG	5	+	560	1185
ENSDARG00000012671	ENSDART00000093251	24	2	2	GCCAACTACTGCGAAGGCGACTGC	6	+	955	1185
ENSDARG00000012671	ENSDART00000093251	24	2	2	CTCTACTACAACGAGGAGCAGAA	5	+	1120	1185
ENSDARG00000012671	ENSDART00000093251	24	2	2	CTCATCTCCAAGGAAGGCGGTGAG	6	+	451	1185
ENSDARG00000012671	ENSDART00000093251	24	2	2	CACGCCAACTACTGCGAAGGCGAC	6	+	952	1185
ENSDARG00000012671	ENSDART00000093251	24	2	2	ACATTCGGCTGCTTCTGCAGCAGGG	7	+	551	1185
ENSDARG00000012671	ENSDART00000093251	24	2	2	AACGTCAACATTCGGCTGCTTCT	5	+	544	1185
ENSDARG00000013175	ENSDART00000011886	24	2	1	CTCCAAGTCAGACCCGCTGTGTGT	6	+	81	1596
ENSDARG00000013175	ENSDART00000011886	24	3	2	GACGACTTCCTGGGCGAGTTGGAG	6	+	283	1596
ENSDARG00000013175	ENSDART00000011886	24	3	2	AAATTCGCCAAGAAGTTTGTGGTC	6	+	181	1596
ENSDARG00000013175	ENSDART00000011886	24	10	9	CTAGACTACATCATGGGAGGCTGC	6	+	847	1596
ENSDARG00000013175	ENSDART00000011886	24	10	9	CTAGACTACATCATGGGAGGCTGCC	7	+	847	1596
ENSDARG00000013175	ENSDART00000011886	24	12	11	GTTTCCGGCGTTTGGATTTGGCG	5	+	1029	1596
ENSDARG00000013175	ENSDART00000011886	24	12	11	GTTTCCGGCGTTTGGATTTGGCGCT	7	+	1029	1596
ENSDARG00000013175	ENSDART00000011886	24	13	12	TCCTACAAATCCATTCTGTGCAGGT	7	+	1104	1596
ENSDARG00000013175	ENSDART00000011886	24	13	12	TACAAATCCATTCTGTGCAGGTTTG	7	+	1107	1596
ENSDARG00000013175	ENSDART00000011886	24	13	12	CTACAAATCCATTCTGTGCAGGT	5	+	1106	1596
ENSDARG00000013175	ENSDART00000011886	24	15	14	TCCATCATCATCGTCGGCGTAGGA	6	+	1354	1596
ENSDARG00000013175	ENSDART00000011886	24	15	14	TCCATCATCATCGTCGGCGTAGGAA	7	+	1354	1596
ENSDARG00000013310	ENSDART00000006615	24	1	1	GTCTCCAGCGCGCCTGCGACGCG	5	+	98	3849
ENSDARG00000013310	ENSDART00000006615	24	1	1	GTCACCTTCGGACGATTAGACTTT	6	+	142	3849
ENSDARG00000013310	ENSDART00000006615	24	1	1	GCAAACAGAGGTCCCTGCGGGCTGT	7	+	8	3849
ENSDARG00000013310	ENSDART00000006615	24	1	1	CGCGCCTGCGACGCGGAGAGTGC	5	+	106	3849
ENSDARG00000013310	ENSDART00000006615	24	2	2	CACAGCACAGTCCCTTAAGGTGAG	6	+	324	3849
ENSDARG00000013310	ENSDART00000006615	24	4	4	CCCAACAACGAGTACTTGTGCTGTG	7	+	409	3849
ENSDARG00000013310	ENSDART00000006615	24	4	4	ACATGCAGCCCAACTGGGACAAC	5	+	464	3849
ENSDARG00000013310	ENSDART00000006615	24	5	5	CGCATCGACAACACTGAGGTTTTG	6	+	658	3849
ENSDARG00000013310	ENSDART00000006615	24	5	5	ATCGACAACACTGAGGTTTTGAC	5	+	661	3849
ENSDARG00000013310	ENSDART00000006615	24	7	7	GACAACGCCATCCAGTGGTGAGTG	6	+	991	3849
ENSDARG00000013310	ENSDART00000006615	24	7	7	AGACAACGCCATCCAGTGGTGAGTG	7	+	990	3849
ENSDARG00000013310	ENSDART00000006615	24	9	9	CCCCAAAGCTGTGCAGGCCGCTGAG	7	+	1227	3849
ENSDARG00000013310	ENSDART00000006615	24	9	9	GACATCCCCAAAGCTGTGCAGGC	5	+	1222	3849
ENSDARG00000013310	ENSDART00000006615	24	10	10	ACCTCCAGCTGATTCAGCATTTTAA	7	+	1304	3849
ENSDARG00000013310	ENSDART00000006615	24	16	16	GTATTCCCAACCACTGCATGAGGA	6	+	1908	3849
ENSDARG00000013310	ENSDART00000006615	24	18	18	TTAGTCAACACTTACAGTGGCGTGT	7	+	2179	3849
ENSDARG00000013310	ENSDART00000006615	24	18	18	CACGTCAAAGAGACTGGCTGGAGTC	7	+	2223	3849
ENSDARG00000013310	ENSDART00000006615	24	19	19	TGCACCATCATTGAGATGGCGAC	5	+	2356	3849
ENSDARG00000013310	ENSDART00000006615	24	20	20	AAAGACCCCTTCCTGCGGCAGAA	5	+	2551	3849
ENSDARG00000013310	ENSDART00000006615	24	23	23	GAAGCCACAGGCAGCAGCAGCAGCG	7	+	2671	3849
ENSDARG00000013310	ENSDART00000006615	24	23	23	AGAAGCCACAGGCAGCAGCAGCA	5	+	2670	3849
ENSDARG00000013310	ENSDART00000006615	24	23	23	GACTCCAAACAAGATGTGTTTTT	5	+	2722	3849
ENSDARG00000013310	ENSDART00000006615	24	23	23	GACTCCAAACAAGATGTGTTTTTC	6	+	2722	3849
ENSDARG00000013310	ENSDART00000006615	24	23	23	TGCGACTCCAAACAAGATGTGTTT	6	+	2719	3849
ENSDARG00000013310	ENSDART00000006615	24	25	25	AAACAAATCATCTGCATCTTGAGAG	7	+	3019	3849
ENSDARG00000013310	ENSDART00000006615	24	26	26	ATCATCAGACGGGCTGTGCAGGC	5	+	3229	3849
ENSDARG00000013310	ENSDART00000006615	24	27	27	TCCCGCATCAGAGAGCGAGGGCGCA	7	+	3294	3849
ENSDARG00000013310	ENSDART00000006615	24	27	27	AAAGACGCAGATGAAGTAGATGAA	6	+	3322	3849
ENSDARG00000013310	ENSDART00000006615	24	27	27	CGCATCAGAGAGCGAGGGCGCAGAT	7	+	3297	3849
ENSDARG00000013310	ENSDART00000006615	24	27	27	AGACGCAGATGAAGTAGATGAAGAG	7	+	3324	3849
ENSDARG00000013310	ENSDART00000006615	24	28	28	GTAGGCTTCTGGAGGAGCTGGTGCA	7	+	3503	3849
ENSDARG00000013310	ENSDART00000006615	24	28	28	GACAGCAGCCTGCTGCAGGTTAG	5	+	3605	3849
ENSDARG00000013310	ENSDART00000105816	24	1	1	CGCGCCTGCGACGCGGAGAGTGC	5	+	106	2172
ENSDARG00000013310	ENSDART00000105816	24	1	1	GCAAACAGAGGTCCCTGCGGGCTGT	7	+	8	2172
ENSDARG00000013310	ENSDART00000105816	24	1	1	GTCACCTTCGGACGATTAGACTTT	6	+	142	2172
ENSDARG00000013310	ENSDART00000105816	24	1	1	GTCTCCAGCGCGCCTGCGACGCG	5	+	98	2172
ENSDARG00000013310	ENSDART00000105816	24	2	2	CACAGCACAGTCCCTTAAGGTGAG	6	+	324	2172
ENSDARG00000013310	ENSDART00000105816	24	4	4	CCCAACAACGAGTACTTGTGCTGTG	7	+	409	2172
ENSDARG00000013310	ENSDART00000105816	24	4	4	ACATGCAGCCCAACTGGGACAAC	5	+	464	2172
ENSDARG00000013310	ENSDART00000105816	24	5	5	CGCATCGACAACACTGAGGTTTTG	6	+	658	2172
ENSDARG00000013310	ENSDART00000105816	24	5	5	ATCGACAACACTGAGGTTTTGAC	5	+	661	2172
ENSDARG00000013310	ENSDART00000105816	24	7	7	GACAACGCCATCCAGTGGTGAGTG	6	+	991	2172
ENSDARG00000013310	ENSDART00000105816	24	7	7	AGACAACGCCATCCAGTGGTGAGTG	7	+	990	2172
ENSDARG00000013310	ENSDART00000105816	24	9	9	CCCCAAAGCTGTGCAGGCCGCTGAG	7	+	1227	2172
ENSDARG00000013310	ENSDART00000105816	24	9	9	GACATCCCCAAAGCTGTGCAGGC	5	+	1222	2172
ENSDARG00000013310	ENSDART00000105816	24	10	10	ACCTCCAGCTGATTCAGCATTTTAA	7	+	1304	2172
ENSDARG00000013310	ENSDART00000105816	24	16	16	GTATTCCCAACCACTGCATGAGGA	6	+	1908	2172
ENSDARG00000013861	ENSDART00000012399	24	2	1	GTAGACGACTTGAGGATTGGGAT	5	-	137	825
ENSDARG00000013861	ENSDART00000012399	24	3	2	TACTTCTGCATGACGTTCTGCAGGC	7	-	242	825
ENSDARG00000013861	ENSDART00000012399	24	4	3	TTCAGCCTCTGCACTGCTGGAGTT	6	-	322	825
ENSDARG00000013861	ENSDART00000012399	24	5	4	GACCTCTGCCTTCAGGTCTGAGCG	6	-	550	825
ENSDARG00000013933	ENSDART00000005804	24	3	3	TCCACCTCCGAGATGATGATGAT	5	-	681	906
ENSDARG00000013933	ENSDART00000005804	24	3	3	GACCTCCACTGTGCGTTGGCGTG	5	-	207	906
ENSDARG00000013933	ENSDART00000005804	24	3	3	GACCTCCACCTCCGAGATGATGAT	6	-	684	906
ENSDARG00000013933	ENSDART00000005804	24	3	3	GAATGCAGAGATGCTGTCGATGAC	6	-	472	906
ENSDARG00000013933	ENSDART00000005804	24	3	3	CTCCACCTCCGAGATGATGATGAT	6	-	681	906
ENSDARG00000013933	ENSDART00000005804	24	3	3	CACGACACAGAATGAGCATTTTTT	6	-	862	906
ENSDARG00000013933	ENSDART00000005804	24	3	3	ATCTTCCACGACACAGAATGAGCA	6	-	868	906
ENSDARG00000013933	ENSDART00000005804	24	3	3	ACCTCCAGACCTCCACTGTGCGTTG	7	-	212	906
ENSDARG00000013933	ENSDART00000005804	24	3	3	ACCTCCACCTCCGAGATGATGAT	5	-	684	906
ENSDARG00000013944	ENSDART00000026698	24	2	2	GTCTGCAGAAGTGTTTGCGGTTTG	6	+	101	483
ENSDARG00000013944	ENSDART00000026698	24	2	2	GGCCTCTTCCAGCCAGCTGGAGAC	6	+	205	483
ENSDARG00000013944	ENSDART00000026698	24	3	3	ACAAACAAACAAACCTGGATGAGAA	7	+	335	483
ENSDARG00000013965	ENSDART00000013257	24	1	1	ACAATCAGAGCGGTTGTGATGCT	5	+	67	2235
ENSDARG00000013965	ENSDART00000013257	24	3	3	GAATACAGCAAAGGCGCTGAGTAC	6	+	286	2235
ENSDARG00000013965	ENSDART00000013257	24	4	4	GAACACACAGTTTATTAAGAAGAA	6	+	333	2235
ENSDARG00000013965	ENSDART00000013257	24	7	7	GAAGCCTCCAATCTGCTGCAGGA	5	+	673	2235
ENSDARG00000013965	ENSDART00000013257	24	9	9	TACCGCACATGATCCAGGAGCTGCA	7	+	932	2235
ENSDARG00000013965	ENSDART00000013257	24	10	10	TGCCAACACTGTTCGTGGAGTCGGT	7	+	1013	2235
ENSDARG00000013965	ENSDART00000013257	24	11	11	CAAAGCCCCTGAGCTGGTGGGTAA	6	+	1164	2235
ENSDARG00000013965	ENSDART00000013257	24	11	11	CAAAGCCCCTGAGCTGGTGGGTA	5	+	1164	2235
ENSDARG00000013965	ENSDART00000013257	24	11	11	TGCAAAGCCCCTGAGCTGGTGGGTA	7	+	1162	2235
ENSDARG00000013965	ENSDART00000013257	24	11	11	TGCAAAGCCCCTGAGCTGGTGGG	5	+	1162	2235
ENSDARG00000013965	ENSDART00000013257	24	12	12	AAAGACGTCTTTCAGAAGGTGAG	5	+	1291	2235
ENSDARG00000013965	ENSDART00000013257	24	12	12	ATCGGCTAAAGGAATGACGGAGAA	6	+	1212	2235
ENSDARG00000013965	ENSDART00000013257	24	13	13	TACGCCAGAATGCTTGCGAAGAG	5	+	1312	2235
ENSDARG00000013965	ENSDART00000013257	24	14	14	TTCATCAAAACCCAGGAGACGGT	5	+	1486	2235
ENSDARG00000013965	ENSDART00000013257	24	16	16	CACTTCAGCGGCAGGAAGTTGAC	5	+	1648	2235
ENSDARG00000013965	ENSDART00000013257	24	19	19	AACGCCCTCATACAGGAGGTGAG	5	+	2098	2235
ENSDARG00000013965	ENSDART00000013257	24	20	20	GAAGCCAGAGCTCTGCGGATGAGTA	7	+	2207	2235
ENSDARG00000013965	ENSDART00000013257	24	20	20	GAAGCCAGAGCTCTGCGGATGAG	5	+	2207	2235
ENSDARG00000013976	ENSDART00000013294	24	4	4	AACTGCAAACACGTGAGGAGGGT	5	-	263	948
ENSDARG00000013976	ENSDART00000013294	24	9	9	TACAAACCAAGCGTGGTGTAGCA	5	-	712	948
ENSDARG00000013976	ENSDART00000013294	24	9	9	AAACCAAGCGTGGTGTAGCAGTC	5	-	709	948
ENSDARG00000013976	ENSDART00000013294	24	10	10	AGCGACACACGATGATGCGGATGAG	7	-	811	948
ENSDARG00000013976	ENSDART00000013294	24	10	10	TCCGGCTCCTTTCATAGCGGCGTTC	7	-	771	948
ENSDARG00000013976	ENSDART00000013294	24	11	11	CGCCTCCGCATTCAGAGCTGATGGC	7	-	901	948
ENSDARG00000013976	ENSDART00000013294	24	11	11	GCATTCAGAGCTGATGGCGTCTTT	6	-	895	948
ENSDARG00000013976	ENSDART00000013294	24	11	11	GCCTCCGCATTCAGAGCTGATGGC	6	-	901	948
ENSDARG00000014201	ENSDART00000027268	24	2	2	TTAAAATGCAGGCTGGGTGGCGGT	6	+	130	996
ENSDARG00000014201	ENSDART00000027268	24	2	2	CAATCCGCCGGGTGTAGCGGTCAAC	7	+	252	996
ENSDARG00000014201	ENSDART00000027268	24	2	2	TTAAAATGCAGGCTGGGTGGCGGTG	7	+	130	996
ENSDARG00000014201	ENSDART00000027268	24	2	2	GAATCACGCGTGCAGGTGAGTGC	5	+	472	996
ENSDARG00000014201	ENSDART00000027268	24	3	3	GTTCCCCTCCGCTGCGGCGGCCGCA	7	+	591	996
ENSDARG00000014201	ENSDART00000027268	24	3	3	TTCCCCTCCGCTGCGGCGGCCGCA	6	+	592	996
ENSDARG00000014201	ENSDART00000027268	24	3	3	CTCCGCTGCGGCGGCCGCAGCAGCC	7	+	597	996
ENSDARG00000014201	ENSDART00000027268	24	3	3	CCCCTCCGCTGCGGCGGCCGCAGCA	7	+	594	996
ENSDARG00000014201	ENSDART00000027268	24	3	3	CACTCACCACGGCCTGCCGCAGTT	6	+	570	996
ENSDARG00000014201	ENSDART00000027268	24	3	3	CAACCCACCTTCCCCGGAATGGTGC	7	+	841	996
ENSDARG00000014201	ENSDART00000027268	24	3	3	ACCGCCCGCCCTAGGCCGACAAC	5	+	705	996
ENSDARG00000014259	ENSDART00000012253	24	2	1	GTCCACACAGCCGAGTAAGTGGAA	6	+	32	1830
ENSDARG00000014259	ENSDART00000012253	24	4	3	CGCCACCTCTGTAGCAGACGGCTCT	7	+	231	1830
ENSDARG00000014259	ENSDART00000012253	24	4	3	GAAATCGCCACCTCTGTAGCAGAC	6	+	226	1830
ENSDARG00000014259	ENSDART00000012253	24	4	3	ATCGCCACCTCTGTAGCAGACGGC	6	+	229	1830
ENSDARG00000014259	ENSDART00000012253	24	6	5	TTCCGCCCAGAATATGGCGGCGTAC	7	+	375	1830
ENSDARG00000014259	ENSDART00000012253	24	6	5	TTCCGCCCAGAATATGGCGGCGTA	6	+	375	1830
ENSDARG00000014259	ENSDART00000012253	24	7	6	GCAGGCATCAAGACAGAGGGTGGA	6	+	487	1830
ENSDARG00000014259	ENSDART00000012253	24	11	10	TACGCCAACCGATTCGGAAGGGTAA	7	+	1093	1830
ENSDARG00000014259	ENSDART00000012253	24	14	13	CACCTATAAAAATAACGTCGGAGGT	7	+	1401	1830
ENSDARG00000014259	ENSDART00000012253	24	14	13	GCCACCGGCGTACGAGGAGGCGTG	6	+	1324	1830
ENSDARG00000014259	ENSDART00000081595	24	1	1	GTCCACACAGCCGAGTAAGTGGAA	6	+	32	1764
ENSDARG00000014259	ENSDART00000081595	24	2	2	ATCGCCACCTCTGTAGCAGACGGC	6	+	163	1764
ENSDARG00000014259	ENSDART00000081595	24	2	2	CGCCACCTCTGTAGCAGACGGCTCT	7	+	165	1764
ENSDARG00000014259	ENSDART00000081595	24	2	2	GAAATCGCCACCTCTGTAGCAGAC	6	+	160	1764
ENSDARG00000014259	ENSDART00000081595	24	4	4	TTCCGCCCAGAATATGGCGGCGTAC	7	+	309	1764
ENSDARG00000014259	ENSDART00000081595	24	4	4	TTCCGCCCAGAATATGGCGGCGTA	6	+	309	1764
ENSDARG00000014259	ENSDART00000081595	24	5	5	GCAGGCATCAAGACAGAGGGTGGA	6	+	421	1764
ENSDARG00000014259	ENSDART00000081595	24	9	9	TACGCCAACCGATTCGGAAGGGTAA	7	+	1027	1764
ENSDARG00000014259	ENSDART00000081595	24	12	12	CACCTATAAAAATAACGTCGGAGGT	7	+	1335	1764
ENSDARG00000014259	ENSDART00000081595	24	12	12	GCCACCGGCGTACGAGGAGGCGTG	6	+	1258	1764
ENSDARG00000014488	ENSDART00000038364	24	2	2	GCAGGCCCAGACAAATGGGGTGAG	6	+	40	780
ENSDARG00000014488	ENSDART00000038364	24	2	2	GGCCCAGACAAATGGGGTGAGAG	5	+	43	780
ENSDARG00000014488	ENSDART00000038364	24	3	3	CACTTCCACTGGGGATCTGCAGAC	6	+	289	780
ENSDARG00000014488	ENSDART00000038364	24	5	5	CTAAACTCCAGAAAATTCTGGATGC	7	+	470	780
ENSDARG00000014488	ENSDART00000038364	24	6	6	GACCACACCACCACTGCTGGAGAG	6	+	600	780
ENSDARG00000014527	ENSDART00000022555	24	5	5	CACTTCAGCAACATTGCAGCTGGG	6	-	571	1215
ENSDARG00000014527	ENSDART00000022555	24	5	5	CAATACTGCCGATGTGTTTGGGAT	6	-	545	1215
ENSDARG00000014527	ENSDART00000022555	24	5	5	CAATACTGCCGATGTGTTTGGGA	5	-	546	1215
ENSDARG00000014527	ENSDART00000022555	24	6	6	TGCTCACACACCATCTTAGCGGTT	6	-	612	1215
ENSDARG00000014527	ENSDART00000022555	24	9	9	ACCAGCGGCACTCGTTTGGAGTC	5	-	949	1215
ENSDARG00000014556	ENSDART00000010658	24	1	1	CTCTGCGGCGCTCTCGATGCTTTC	6	+	114	1140
ENSDARG00000014556	ENSDART00000010658	24	2	2	AGACGCTGCACTTTGATGGAGCC	5	+	176	1140
ENSDARG00000014556	ENSDART00000010658	24	2	2	TCCTGCCGCTTCCAGGAGGTGTG	5	+	301	1140
ENSDARG00000014556	ENSDART00000010658	24	2	2	TCCTGCCGCTTCCAGGAGGTGTGT	6	+	301	1140
ENSDARG00000014556	ENSDART00000010658	24	2	2	TGCCGCTTCCAGGAGGTGTGTGT	5	+	304	1140
ENSDARG00000014556	ENSDART00000010658	24	3	3	CGCGGCGTCTGTACGGGGCGGAGCT	7	+	335	1140
ENSDARG00000014556	ENSDART00000010658	24	3	3	CGCGGCGTCTGTACGGGGCGGAG	5	+	335	1140
ENSDARG00000014556	ENSDART00000010658	24	3	3	ATCAACCGCTGGGTGGAGCAGCA	5	+	406	1140
ENSDARG00000014556	ENSDART00000010658	24	4	4	AGAAAATCCGGGATCTGCTGGCGGA	7	+	437	1140
ENSDARG00000014556	ENSDART00000010658	24	5	5	CCCCGCAGACAGCCTGCAGCCGCT	6	+	459	1140
ENSDARG00000014556	ENSDART00000010658	24	5	5	GTCAAAACATATGCAGGAATAGTTG	7	+	485	1140
ENSDARG00000014556	ENSDART00000010658	24	6	6	ACACACACACACAGGTGTGAGCA	5	+	548	1140
ENSDARG00000014556	ENSDART00000010658	24	6	6	ACACACACACACACAGGTGTGAGCA	7	+	546	1140
ENSDARG00000014556	ENSDART00000010658	24	9	9	GGCGGCGGCGGCCACGGCGGCGGTG	7	+	1008	1140
ENSDARG00000014556	ENSDART00000010658	24	9	9	TGCCGCGGCTGCGGGTGGAGGAG	5	+	830	1140
ENSDARG00000014556	ENSDART00000010658	24	9	9	TGCCGCGGCTGCGGGTGGAGGAGCG	7	+	830	1140
ENSDARG00000014556	ENSDART00000010658	24	9	9	ACACAACCCGACCGGCAGTCTGC	5	+	1101	1140
ENSDARG00000014556	ENSDART00000010658	24	9	9	GGCGGCGGCGGCCACGGCGGCGGT	6	+	1008	1140
ENSDARG00000014556	ENSDART00000010658	24	9	9	GGCGGCGGCCACGGCGGCGGTGAT	6	+	1011	1140
ENSDARG00000014556	ENSDART00000010658	24	9	9	GGCGGCCACGGCGGCGGTGATGAT	6	+	1014	1140
ENSDARG00000014556	ENSDART00000010658	24	9	9	AGCTGCTGCTGTCCACGGTGGTGCA	7	+	947	1140
ENSDARG00000014556	ENSDART00000010658	24	9	9	CTCTGCCGCGGCTGCGGGTGGAGGA	7	+	827	1140
ENSDARG00000014556	ENSDART00000010658	24	9	9	CAACCCGACCGGCAGTCTGCTGTT	6	+	1104	1140
ENSDARG00000014556	ENSDART00000010658	24	9	9	GACGCCTTCGACCCGCAGCGGGC	5	+	895	1140
ENSDARG00000014556	ENSDART00000010658	24	9	9	GCACCAGTCCTTCCTGGAGGTGAA	6	+	969	1140
ENSDARG00000014556	ENSDART00000010658	24	9	9	GCACCAGTCCTTCCTGGAGGTGAAC	7	+	969	1140
ENSDARG00000014556	ENSDART00000010658	24	9	9	GGCCACGGCGGCGGTGATGATGAC	6	+	1017	1140
ENSDARG00000014556	ENSDART00000105496	24	3	3	TCCACCAGAGTGTGTGTGGAGTC	5	+	108	1230
ENSDARG00000014556	ENSDART00000105496	24	3	3	TCCACCAGAGTGTGTGTGTGGAG	5	+	85	1230
ENSDARG00000014556	ENSDART00000105496	24	3	3	TCCACCAGAGTGTGTGTGTGGAGTC	7	+	85	1230
ENSDARG00000014556	ENSDART00000105496	24	3	3	TCCTGCCGCTTCCAGGAGGTGTGT	6	+	367	1230
ENSDARG00000014556	ENSDART00000105496	24	3	3	TCCTGCCGCTTCCAGGAGGTGTG	5	+	367	1230
ENSDARG00000014556	ENSDART00000105496	24	3	3	TGCCGCTTCCAGGAGGTGTGTGT	5	+	370	1230
ENSDARG00000014556	ENSDART00000105496	24	3	3	AGACGCTGCACTTTGATGGAGCC	5	+	242	1230
ENSDARG00000014556	ENSDART00000105496	24	4	4	ATCAACCGCTGGGTGGAGCAGCA	5	+	472	1230
ENSDARG00000014556	ENSDART00000105496	24	4	4	CGCGGCGTCTGTACGGGGCGGAG	5	+	401	1230
ENSDARG00000014556	ENSDART00000105496	24	4	4	CGCGGCGTCTGTACGGGGCGGAGCT	7	+	401	1230
ENSDARG00000014556	ENSDART00000105496	24	5	5	AGAAAATCCGGGATCTGCTGGCGGA	7	+	503	1230
ENSDARG00000014556	ENSDART00000105496	24	10	10	GGCGGCGGCGGCCACGGCGGCGGTG	7	+	1098	1230
ENSDARG00000014556	ENSDART00000105496	24	10	10	GGCGGCGGCGGCCACGGCGGCGGT	6	+	1098	1230
ENSDARG00000014556	ENSDART00000105496	24	10	10	TGCCGCGGCTGCGGGTGGAGGAG	5	+	920	1230
ENSDARG00000014556	ENSDART00000105496	24	10	10	TGCCGCGGCTGCGGGTGGAGGAGCG	7	+	920	1230
ENSDARG00000014556	ENSDART00000105496	24	10	10	GGCGGCGGCCACGGCGGCGGTGAT	6	+	1101	1230
ENSDARG00000014556	ENSDART00000105496	24	10	10	ACACAACCCGACCGGCAGTCTGC	5	+	1191	1230
ENSDARG00000014556	ENSDART00000105496	24	10	10	AGCTGCTGCTGTCCACGGTGGTGCA	7	+	1037	1230
ENSDARG00000014556	ENSDART00000105496	24	10	10	CAACCCGACCGGCAGTCTGCTGTT	6	+	1194	1230
ENSDARG00000014556	ENSDART00000105496	24	10	10	CTCTGCCGCGGCTGCGGGTGGAGGA	7	+	917	1230
ENSDARG00000014556	ENSDART00000105496	24	10	10	GACGCCTTCGACCCGCAGCGGGC	5	+	985	1230
ENSDARG00000014556	ENSDART00000105496	24	10	10	GCACCAGTCCTTCCTGGAGGTGAA	6	+	1059	1230
ENSDARG00000014556	ENSDART00000105496	24	10	10	GCACCAGTCCTTCCTGGAGGTGAAC	7	+	1059	1230
ENSDARG00000014556	ENSDART00000105496	24	10	10	GGCCACGGCGGCGGTGATGATGAC	6	+	1107	1230
ENSDARG00000014556	ENSDART00000105496	24	10	10	GGCGGCCACGGCGGCGGTGATGAT	6	+	1104	1230
ENSDARG00000014556	ENSDART00000105498	24	1	1	CTCTGCGGCGCTCTCGATGCTTTC	6	+	114	1161
ENSDARG00000014556	ENSDART00000105498	24	2	2	TGCCGCTTCCAGGAGGTGTGTGT	5	+	304	1161
ENSDARG00000014556	ENSDART00000105498	24	2	2	TCCTGCCGCTTCCAGGAGGTGTG	5	+	301	1161
ENSDARG00000014556	ENSDART00000105498	24	2	2	TCCTGCCGCTTCCAGGAGGTGTGT	6	+	301	1161
ENSDARG00000014556	ENSDART00000105498	24	2	2	AGACGCTGCACTTTGATGGAGCC	5	+	176	1161
ENSDARG00000014556	ENSDART00000105498	24	3	3	ATCAACCGCTGGGTGGAGCAGCA	5	+	406	1161
ENSDARG00000014556	ENSDART00000105498	24	3	3	CGCGGCGTCTGTACGGGGCGGAGCT	7	+	335	1161
ENSDARG00000014556	ENSDART00000105498	24	3	3	CGCGGCGTCTGTACGGGGCGGAG	5	+	335	1161
ENSDARG00000014556	ENSDART00000105498	24	4	4	AGAAAATCCGGGATCTGCTGGCGGA	7	+	437	1161
ENSDARG00000014556	ENSDART00000105498	24	9	9	GGCGGCGGCGGCCACGGCGGCGGT	6	+	1029	1161
ENSDARG00000014556	ENSDART00000105498	24	9	9	TGCCGCGGCTGCGGGTGGAGGAG	5	+	851	1161
ENSDARG00000014556	ENSDART00000105498	24	9	9	TGCCGCGGCTGCGGGTGGAGGAGCG	7	+	851	1161
ENSDARG00000014556	ENSDART00000105498	24	9	9	GGCGGCGGCGGCCACGGCGGCGGTG	7	+	1029	1161
ENSDARG00000014556	ENSDART00000105498	24	9	9	GGCGGCGGCCACGGCGGCGGTGAT	6	+	1032	1161
ENSDARG00000014556	ENSDART00000105498	24	9	9	GGCGGCCACGGCGGCGGTGATGAT	6	+	1035	1161
ENSDARG00000014556	ENSDART00000105498	24	9	9	AGCTGCTGCTGTCCACGGTGGTGCA	7	+	968	1161
ENSDARG00000014556	ENSDART00000105498	24	9	9	CAACCCGACCGGCAGTCTGCTGTT	6	+	1125	1161
ENSDARG00000014556	ENSDART00000105498	24	9	9	CTCTGCCGCGGCTGCGGGTGGAGGA	7	+	848	1161
ENSDARG00000014556	ENSDART00000105498	24	9	9	GACGCCTTCGACCCGCAGCGGGC	5	+	916	1161
ENSDARG00000014556	ENSDART00000105498	24	9	9	GCACCAGTCCTTCCTGGAGGTGAA	6	+	990	1161
ENSDARG00000014556	ENSDART00000105498	24	9	9	GCACCAGTCCTTCCTGGAGGTGAAC	7	+	990	1161
ENSDARG00000014556	ENSDART00000105498	24	9	9	GGCCACGGCGGCGGTGATGATGAC	6	+	1038	1161
ENSDARG00000014556	ENSDART00000105498	24	9	9	ACACAACCCGACCGGCAGTCTGC	5	+	1122	1161
ENSDARG00000014792	ENSDART00000007208	24	1	1	CCCGCCTGCCCTGCTCTCTGTAGCT	7	+	4	1794
ENSDARG00000014792	ENSDART00000007208	24	2	2	TTCGTCAGATAGAAGTGGGAGCG	5	+	206	1794
ENSDARG00000014792	ENSDART00000007208	24	2	2	TTCGCCAGCTCGGCAGTTTGTCAAC	7	+	1284	1794
ENSDARG00000014792	ENSDART00000007208	24	2	2	TGCAGCAGCTGGAGCGTGTGCATCT	7	+	740	1794
ENSDARG00000014792	ENSDART00000007208	24	2	2	GTTTGCAACTGTGATGTGTTGTG	5	+	781	1794
ENSDARG00000014792	ENSDART00000007208	24	2	2	GTCTCCATCACGGATGTTGCCAAC	6	+	1426	1794
ENSDARG00000014792	ENSDART00000007208	24	2	2	GCCATCACCTTCATGGCGGCCGTG	6	+	1507	1794
ENSDARG00000014792	ENSDART00000007208	24	2	2	CTCCACTGCAGCAGCTGGAGCGTGT	7	+	734	1794
ENSDARG00000014792	ENSDART00000007208	24	2	2	CACCACAGCGACTGCTGTGCTGAA	6	+	1173	1794
ENSDARG00000014792	ENSDART00000007208	24	2	2	AGATTCGTCAGATAGAAGTGGGA	5	+	203	1794
ENSDARG00000014973	ENSDART00000013675	24	2	2	ACCCCAAACCTCTGGCAGTCAAC	5	+	152	1380
ENSDARG00000014973	ENSDART00000013675	24	2	2	TGCAACAACGAGTGCGATGCAGCC	6	+	37	1380
ENSDARG00000014973	ENSDART00000013675	24	2	2	TACCCCAAACCTCTGGCAGTCAAC	6	+	151	1380
ENSDARG00000014973	ENSDART00000013675	24	5	5	CTAAACGCCGTCATTTGCGTGAGCT	7	+	913	1380
ENSDARG00000014973	ENSDART00000013675	24	5	5	CAATCACTCCAATCGCTGCAGTT	5	+	879	1380
ENSDARG00000014973	ENSDART00000013675	24	5	5	TGCCACAGCAAAGCCGGACGATGAG	7	+	996	1380
ENSDARG00000014973	ENSDART00000013675	24	7	7	TGCGACAGCGAACTTCTGCGTTGCC	7	+	1177	1380
ENSDARG00000014973	ENSDART00000013675	24	7	7	TGCGACAGCGAACTTCTGCGTTG	5	+	1177	1380
ENSDARG00000014973	ENSDART00000013675	24	7	7	TACACCGGCCTGCTGTGTGAGAA	5	+	1252	1380
ENSDARG00000014973	ENSDART00000013675	24	7	7	GTTGCCAAAATGGCGGCGTGTGT	5	+	1196	1380
ENSDARG00000014973	ENSDART00000066605	24	3	3	TGCCACAGCAAAGCCGGACGATGAG	7	+	237	546
ENSDARG00000014973	ENSDART00000066605	24	3	3	CTAAACGCCGTCATTTGCGTGAGCT	7	+	154	546
ENSDARG00000014973	ENSDART00000066605	24	3	3	CAATCACTCCAATCGCTGCAGTT	5	+	120	546
ENSDARG00000014973	ENSDART00000066605	24	5	5	GTTGCCAAAATGGCGGCGTGTGT	5	+	437	546
ENSDARG00000014973	ENSDART00000066605	24	5	5	TACACCGGCCTGCTGTGTGAGAA	5	+	493	546
ENSDARG00000014973	ENSDART00000066605	24	5	5	TGCGACAGCGAACTTCTGCGTTG	5	+	418	546
ENSDARG00000014973	ENSDART00000066605	24	5	5	TGCGACAGCGAACTTCTGCGTTGCC	7	+	418	546
ENSDARG00000014973	ENSDART00000105742	24	1	1	TGCAACAACGAGTGCGATGCAGCC	6	+	22	1371
ENSDARG00000014973	ENSDART00000105742	24	1	1	TACCCCAAACCTCTGGCAGTCAAC	6	+	136	1371
ENSDARG00000014973	ENSDART00000105742	24	1	1	ACCCCAAACCTCTGGCAGTCAAC	5	+	137	1371
ENSDARG00000014973	ENSDART00000105742	24	3	3	AACAGCAGATTTGATTGAATTGGGA	7	+	816	1371
ENSDARG00000014973	ENSDART00000105742	24	4	4	CAATCACTCCAATCGCTGCAGTT	5	+	864	1371
ENSDARG00000014973	ENSDART00000105742	24	4	4	CTAAACGCCGTCATTTGCGTGAGCT	7	+	898	1371
ENSDARG00000014973	ENSDART00000105742	24	4	4	TGCCACAGCAAAGCCGGACGATGAG	7	+	981	1371
ENSDARG00000014973	ENSDART00000105742	24	6	6	TGCGACAGCGAACTTCTGCGTTGCC	7	+	1162	1371
ENSDARG00000014973	ENSDART00000105742	24	6	6	TGCGACAGCGAACTTCTGCGTTG	5	+	1162	1371
ENSDARG00000014973	ENSDART00000105742	24	6	6	TACACCGGCCTGCTGTGTGAGAA	5	+	1237	1371
ENSDARG00000014973	ENSDART00000105742	24	6	6	GTTGCCAAAATGGCGGCGTGTGT	5	+	1181	1371
ENSDARG00000014973	ENSDART00000105743	24	2	2	ACCCCAAACCTCTGGCAGTCAAC	5	+	152	1353
ENSDARG00000014973	ENSDART00000105743	24	2	2	TGCAACAACGAGTGCGATGCAGCC	6	+	37	1353
ENSDARG00000014973	ENSDART00000105743	24	2	2	TACCCCAAACCTCTGGCAGTCAAC	6	+	151	1353
ENSDARG00000014973	ENSDART00000105743	24	4	4	TGCCACAGCAAAGCCGGACGATGAG	7	+	969	1353
ENSDARG00000014973	ENSDART00000105743	24	4	4	CTAAACGCCGTCATTTGCGTGAGCT	7	+	886	1353
ENSDARG00000014973	ENSDART00000105743	24	4	4	CAATCACTCCAATCGCTGCAGTT	5	+	852	1353
ENSDARG00000014973	ENSDART00000105743	24	6	6	TGCGACAGCGAACTTCTGCGTTG	5	+	1150	1353
ENSDARG00000014973	ENSDART00000105743	24	6	6	TGCGACAGCGAACTTCTGCGTTGCC	7	+	1150	1353
ENSDARG00000014973	ENSDART00000105743	24	6	6	TACACCGGCCTGCTGTGTGAGAA	5	+	1225	1353
ENSDARG00000014973	ENSDART00000105743	24	6	6	GTTGCCAAAATGGCGGCGTGTGT	5	+	1169	1353
ENSDARG00000014973	ENSDART00000105744	24	2	2	TGCAACAACGAGTGCGATGCAGCC	6	+	37	1560
ENSDARG00000014973	ENSDART00000105744	24	2	2	TACCCCAAACCTCTGGCAGTCAAC	6	+	151	1560
ENSDARG00000014973	ENSDART00000105744	24	2	2	ACCCCAAACCTCTGGCAGTCAAC	5	+	152	1560
ENSDARG00000014973	ENSDART00000105744	24	5	5	TTCTCAGCCCTGCTGGGGAGATTTC	7	+	884	1560
ENSDARG00000014973	ENSDART00000105744	24	8	8	CTAAACGCCGTCATTTGCGTGAGCT	7	+	1087	1560
ENSDARG00000014973	ENSDART00000105744	24	8	8	CAATCACTCCAATCGCTGCAGTT	5	+	1053	1560
ENSDARG00000014973	ENSDART00000105744	24	8	8	TGCCACAGCAAAGCCGGACGATGAG	7	+	1170	1560
ENSDARG00000014973	ENSDART00000105744	24	10	10	TGCGACAGCGAACTTCTGCGTTGCC	7	+	1351	1560
ENSDARG00000014973	ENSDART00000105744	24	10	10	TGCGACAGCGAACTTCTGCGTTG	5	+	1351	1560
ENSDARG00000014973	ENSDART00000105744	24	10	10	TACACCGGCCTGCTGTGTGAGAA	5	+	1426	1560
ENSDARG00000014973	ENSDART00000105744	24	10	10	GTTGCCAAAATGGCGGCGTGTGT	5	+	1370	1560
ENSDARG00000015153	ENSDART00000013581	24	1	1	AAATACGCAGAGAAACTGGGATTCT	7	-	125	1875
ENSDARG00000015153	ENSDART00000013581	24	1	1	AACAGCACACTGAGGAAGTTGTG	5	-	187	1875
ENSDARG00000015153	ENSDART00000013581	24	2	2	GTTACCGTCTGTCGGAGTTGTTC	5	-	286	1875
ENSDARG00000015153	ENSDART00000013581	24	2	2	CTCAGCAGCGCAGGAAGAGGTGAAC	7	-	215	1875
ENSDARG00000015153	ENSDART00000013581	24	2	2	AACTCAGCAGCGCAGGAAGAGGTG	6	-	218	1875
ENSDARG00000015153	ENSDART00000013581	24	2	2	AAACTCAGCAGCGCAGGAAGAGGTG	7	-	218	1875
ENSDARG00000015153	ENSDART00000013581	24	3	3	CTCCCAGTCGGTCCATGTGCTGCA	6	-	377	1875
ENSDARG00000015153	ENSDART00000013581	24	5	5	CAACTCTGCCGTCATGCTGGAAAC	6	-	619	1875
ENSDARG00000015153	ENSDART00000013581	24	5	5	TTCCTCTCCTTCTCGTGGTCTTG	5	-	673	1875
ENSDARG00000015153	ENSDART00000013581	24	5	5	GGCTTCACCTCTTTATCTTTTGCT	6	-	588	1875
ENSDARG00000015153	ENSDART00000013581	24	6	6	ACATCACACACTCGCGTCTGATTG	6	-	798	1875
ENSDARG00000015153	ENSDART00000013581	24	6	6	CACATCACACACTCGCGTCTGATTG	7	-	798	1875
ENSDARG00000015153	ENSDART00000013581	24	7	7	AGAGACAGCAGAGGAGATTTGGAC	6	-	1005	1875
ENSDARG00000015153	ENSDART00000013581	24	7	7	TTACCAGTCTGTCAGGTTTTGCC	5	-	1038	1875
ENSDARG00000015153	ENSDART00000013581	24	9	9	CGCACCAGAATGAGCTGCGGCGGAG	7	-	1197	1875
ENSDARG00000015153	ENSDART00000013581	24	9	9	CGCACCAGAATGAGCTGCGGCGGA	6	-	1198	1875
ENSDARG00000015153	ENSDART00000013581	24	9	9	CACCGCACCAGAATGAGCTGCGGCG	7	-	1200	1875
ENSDARG00000015153	ENSDART00000013581	24	9	9	TCCATCACCGCACCAGAATGAGCT	6	-	1206	1875
ENSDARG00000015153	ENSDART00000013581	24	11	11	TCCGTCCTCTCCGATGCTGAAGAC	6	-	1498	1875
ENSDARG00000015153	ENSDART00000013581	24	11	11	GTCCTCTCCGATGCTGAAGACGGT	6	-	1495	1875
ENSDARG00000015153	ENSDART00000013581	24	12	12	TGCTTCACACCACAGCGGTGGAT	5	-	1540	1875
ENSDARG00000015153	ENSDART00000013581	24	12	12	GTTTCCTCCAGTGCTGGAGCAGGT	6	-	1690	1875
ENSDARG00000015167	ENSDART00000019318	24	1	1	CTCTTCGTCTCTGCTTTAGGATGT	6	-	80	1968
ENSDARG00000015167	ENSDART00000019318	24	1	1	GACACCGCCAGCCACCGCGGAGTTC	7	-	42	1968
ENSDARG00000015167	ENSDART00000019318	24	6	6	GTATTCATCGTAGAGATGTTTGGTA	7	-	480	1968
ENSDARG00000015167	ENSDART00000019318	24	13	13	AGACGCGTCATTTCTCTGCCTGC	5	-	1135	1968
ENSDARG00000015174	ENSDART00000041714	24	2	1	CTCTTCCTCCAGTCTGAAGCGGCC	6	+	52	2517
ENSDARG00000015174	ENSDART00000041714	24	2	1	GGCAGCATCATGGGGGAGTTGTTC	6	+	1	2517
ENSDARG00000015174	ENSDART00000041714	24	2	1	GGCAGCATCATGGGGGAGTTGTT	5	+	1	2517
ENSDARG00000015174	ENSDART00000041714	24	5	4	TACTCAGCAGTTCTTTGATGAGGTC	7	+	411	2517
ENSDARG00000015174	ENSDART00000041714	24	5	4	GTACTCAGCAGTTCTTTGATGAG	5	+	410	2517
ENSDARG00000015174	ENSDART00000041714	24	10	9	ACCACCGGCAGAGGGTTTTGCAGGC	7	+	839	2517
ENSDARG00000015174	ENSDART00000041714	24	10	9	CGCTGCAAAAACTATGCGCGTGT	5	+	864	2517
ENSDARG00000015174	ENSDART00000041714	24	10	9	TGCAAAAACTATGCGCGTGTGGTTT	7	+	867	2517
ENSDARG00000015174	ENSDART00000041714	24	10	9	GAAGACCACCGGCAGAGGGTTTT	5	+	835	2517
ENSDARG00000015174	ENSDART00000041714	24	10	9	GAAGACCACCGGCAGAGGGTTTTGC	7	+	835	2517
ENSDARG00000015174	ENSDART00000041714	24	11	10	TCCAAAACATTGTGGATGCTTAC	5	+	1130	2517
ENSDARG00000015174	ENSDART00000041714	24	11	10	TTCCAAAACATTGTGGATGCTTAC	6	+	1129	2517
ENSDARG00000015174	ENSDART00000041714	24	13	12	ACATCATTCTACTGATGGGGATGT	6	+	1352	2517
ENSDARG00000015174	ENSDART00000041714	24	13	12	ACATCATTCTACTGATGGGGATGTT	7	+	1352	2517
ENSDARG00000015174	ENSDART00000041714	24	14	13	GTTAAACCCGTCTGTTTCTGGCGTG	7	+	1518	2517
ENSDARG00000015174	ENSDART00000041714	24	14	13	AAACCCGTCTGTTTCTGGCGTGTTT	7	+	1521	2517
ENSDARG00000015174	ENSDART00000041714	24	17	16	TGCGCCGTCAGCACTTGTGGAAGAA	7	+	1988	2517
ENSDARG00000015174	ENSDART00000041714	24	17	16	GCCGTCAGCACTTGTGGAAGAAGCA	7	+	1991	2517
ENSDARG00000015174	ENSDART00000041714	24	18	17	ACACTCAGAGGAAGGTGATGAGGTG	7	+	2106	2517
ENSDARG00000015174	ENSDART00000041714	24	18	17	GCACACAGAAGTTCGGTGGCGTC	5	+	2021	2517
ENSDARG00000015174	ENSDART00000041714	24	20	19	CACGGCCTCATACCTGCGACTCT	5	+	2217	2517
ENSDARG00000015174	ENSDART00000041714	24	21	20	TTACTCATCATGGAGGGATTGTCT	6	+	2383	2517
ENSDARG00000015174	ENSDART00000106347	24	1	1	GGCAGCATCATGGGGGAGTTGTTC	6	+	1	2190
ENSDARG00000015174	ENSDART00000106347	24	1	1	GGCAGCATCATGGGGGAGTTGTT	5	+	1	2190
ENSDARG00000015174	ENSDART00000106347	24	1	1	CTCTTCCTCCAGTCTGAAGCGGCC	6	+	52	2190
ENSDARG00000015174	ENSDART00000106347	24	4	4	GTACTCAGCAGTTCTTTGATGAG	5	+	410	2190
ENSDARG00000015174	ENSDART00000106347	24	4	4	TACTCAGCAGTTCTTTGATGAGGTC	7	+	411	2190
ENSDARG00000015174	ENSDART00000106347	24	9	9	TGCAAAAACTATGCGCGTGTGGTTT	7	+	867	2190
ENSDARG00000015174	ENSDART00000106347	24	9	9	ACCACCGGCAGAGGGTTTTGCAGGC	7	+	839	2190
ENSDARG00000015174	ENSDART00000106347	24	9	9	GAAGACCACCGGCAGAGGGTTTTGC	7	+	835	2190
ENSDARG00000015174	ENSDART00000106347	24	9	9	CGCTGCAAAAACTATGCGCGTGT	5	+	864	2190
ENSDARG00000015174	ENSDART00000106347	24	9	9	GAAGACCACCGGCAGAGGGTTTT	5	+	835	2190
ENSDARG00000015174	ENSDART00000106347	24	10	10	TCCAAAACATTGTGGATGCTTAC	5	+	1130	2190
ENSDARG00000015174	ENSDART00000106347	24	10	10	TTCCAAAACATTGTGGATGCTTAC	6	+	1129	2190
ENSDARG00000015174	ENSDART00000106347	24	12	12	ACATCATTCTACTGATGGGGATGTT	7	+	1352	2190
ENSDARG00000015174	ENSDART00000106347	24	12	12	ACATCATTCTACTGATGGGGATGT	6	+	1352	2190
ENSDARG00000015174	ENSDART00000106347	24	13	13	GTTAAACCCGTCTGTTTCTGGCGTG	7	+	1518	2190
ENSDARG00000015174	ENSDART00000106347	24	13	13	AAACCCGTCTGTTTCTGGCGTGTTT	7	+	1521	2190
ENSDARG00000015174	ENSDART00000106347	24	16	16	GCCGTCAGCACTTGTGGAAGAAGCA	7	+	1991	2190
ENSDARG00000015174	ENSDART00000106347	24	16	16	TGCGCCGTCAGCACTTGTGGAAGAA	7	+	1988	2190
ENSDARG00000015174	ENSDART00000106347	24	17	17	GCACACAGAAGTTCGGTGGCGTC	5	+	2021	2190
ENSDARG00000015230	ENSDART00000046928	24	7	3	CTCGGCAGCTGAACGGTCTGGTGCT	7	-	197	549
ENSDARG00000015230	ENSDART00000046928	24	7	3	CTCGGCAGCTGAACGGTCTGGTGC	6	-	198	549
ENSDARG00000015230	ENSDART00000046928	24	7	3	AGATGCAGCGTGGCAGAAGGAGGG	6	-	318	549
ENSDARG00000015230	ENSDART00000046928	24	7	3	AACATCTTCTGACCGTTTAGATGGC	7	-	143	549
ENSDARG00000015230	ENSDART00000105725	24	1	1	TGCTTCAGACACATCGTTAGGTAAC	7	-	114	1572
ENSDARG00000015230	ENSDART00000105725	24	1	1	CTCTTCAACTCTGAGTTTTTTGCT	6	-	46	1572
ENSDARG00000015230	ENSDART00000105725	24	1	1	CTCTTCAACTCTGAGTTTTTTGC	5	-	47	1572
ENSDARG00000015230	ENSDART00000105725	24	2	2	AGCAGCTTCCTCCGTGCTGAGCT	5	-	218	1572
ENSDARG00000015230	ENSDART00000105725	24	6	6	AGCAGCAACATCCAAAGCGGGCTGC	7	-	774	1572
ENSDARG00000015230	ENSDART00000105725	24	6	6	TCCCAAGCAGGGAACTGGAGTCTTT	7	-	808	1572
ENSDARG00000015230	ENSDART00000105725	24	9	9	AGCAGCCGCAGCGGCAGCAGCAGCC	7	-	936	1572
ENSDARG00000015230	ENSDART00000105725	24	9	9	AGCCGCAGCGGCAGCAGCAGCCGCA	7	-	933	1572
ENSDARG00000015230	ENSDART00000105725	24	9	9	TCCAGCAGCCGCAGCGGCAGCAGCA	7	-	939	1572
ENSDARG00000015230	ENSDART00000105725	24	9	9	GCAGCCGCAGCGGCAGCAGCAGCC	6	-	936	1572
ENSDARG00000015230	ENSDART00000105725	24	12	12	CTCGGCAGCTGAACGGTCTGGTGC	6	-	1218	1572
ENSDARG00000015230	ENSDART00000105725	24	12	12	CTCGGCAGCTGAACGGTCTGGTGCT	7	-	1217	1572
ENSDARG00000015230	ENSDART00000105725	24	12	12	AGATGCAGCGTGGCAGAAGGAGGG	6	-	1338	1572
ENSDARG00000015230	ENSDART00000105725	24	12	12	AACATCTTCTGACCGTTTAGATGGC	7	-	1163	1572
ENSDARG00000015443	ENSDART00000014671	24	2	2	TTCTGCGCACAATGAGGTTTGAGCC	7	-	178	2133
ENSDARG00000015443	ENSDART00000014671	24	2	2	TCCAACTCCACTTGGTGCTGCTGTT	7	-	248	2133
ENSDARG00000015443	ENSDART00000014671	24	2	2	CTCCAACTCCACTTGGTGCTGCT	5	-	251	2133
ENSDARG00000015443	ENSDART00000014671	24	2	2	CAACTCCACTTGGTGCTGCTGTT	5	-	248	2133
ENSDARG00000015443	ENSDART00000014671	24	2	2	AACTCCAACTCCACTTGGTGCTGCT	7	-	251	2133
ENSDARG00000015443	ENSDART00000014671	24	3	3	CTCACCAGAGTTCCAAGGATTGAAC	7	-	516	2133
ENSDARG00000015443	ENSDART00000014671	24	3	3	AACTACTGCAAAAATGCGGAAGCG	6	-	433	2133
ENSDARG00000015443	ENSDART00000014671	24	3	3	TACTGCAAAAATGCGGAAGCGGCC	6	-	430	2133
ENSDARG00000015443	ENSDART00000014671	24	5	5	AAATCATACCAGAGCTGATGCTTGC	7	-	747	2133
ENSDARG00000015443	ENSDART00000014671	24	11	11	GTCGTCACCTATTTTGATGGTGTT	6	-	1534	2133
ENSDARG00000015443	ENSDART00000014671	24	11	11	GAAGTCGTCACCTATTTTGATGGT	6	-	1537	2133
ENSDARG00000015443	ENSDART00000078386	24	1	1	TTCTGCGCACAATGAGGTTTGAGCC	7	-	91	2058
ENSDARG00000015443	ENSDART00000078386	24	1	1	TCCAACTCCACTTGGTGCTGCTGTT	7	-	161	2058
ENSDARG00000015443	ENSDART00000078386	24	1	1	CTCCAACTCCACTTGGTGCTGCT	5	-	164	2058
ENSDARG00000015443	ENSDART00000078386	24	1	1	CAACTCCACTTGGTGCTGCTGTT	5	-	161	2058
ENSDARG00000015443	ENSDART00000078386	24	1	1	AACTCCAACTCCACTTGGTGCTGCT	7	-	164	2058
ENSDARG00000015443	ENSDART00000078386	24	3	3	CTCACCAGAGTTCCAAGGATTGAAC	7	-	411	2058
ENSDARG00000015443	ENSDART00000078386	24	3	3	TACTGCAAAAATGCGGAAGCGGCC	6	-	325	2058
ENSDARG00000015443	ENSDART00000078386	24	3	3	AACTACTGCAAAAATGCGGAAGCG	6	-	328	2058
ENSDARG00000015443	ENSDART00000078386	24	5	5	AAATCATACCAGAGCTGATGCTTGC	7	-	642	2058
ENSDARG00000015443	ENSDART00000078386	24	11	11	GAAGTCGTCACCTATTTTGATGGT	6	-	1459	2058
ENSDARG00000015443	ENSDART00000078386	24	11	11	GTCGTCACCTATTTTGATGGTGTT	6	-	1456	2058
ENSDARG00000015537	ENSDART00000021609	24	1	1	GAAACCAAAACCCGTGTGATGCC	5	-	12	564
ENSDARG00000015537	ENSDART00000021609	24	3	3	ATCCTCGGCTTTAACTGGGGCTTG	6	-	181	564
ENSDARG00000015537	ENSDART00000021609	24	3	3	AGCCGCAGCTCTCGGCTGTAGAC	5	-	207	564
ENSDARG00000015537	ENSDART00000021609	24	3	3	ACAGCCGCAGCTCTCGGCTGTAGAC	7	-	207	564
ENSDARG00000015537	ENSDART00000021609	24	4	4	CGCGTCTCCGTCCAGTGCAGGTAAC	7	-	294	564
ENSDARG00000015537	ENSDART00000021609	24	4	4	TCCCAATTATTCCTTTGGAGCAGTT	7	-	422	564
ENSDARG00000015537	ENSDART00000038956	24	1	1	GAAACCAAAACCCGTGTGATGCC	5	-	12	1749
ENSDARG00000015537	ENSDART00000038956	24	3	3	ATCCTCGGCTTTAACTGGGGCTTG	6	-	181	1749
ENSDARG00000015537	ENSDART00000038956	24	3	3	AGCCGCAGCTCTCGGCTGTAGAC	5	-	207	1749
ENSDARG00000015537	ENSDART00000038956	24	3	3	ACAGCCGCAGCTCTCGGCTGTAGAC	7	-	207	1749
ENSDARG00000015537	ENSDART00000038956	24	4	4	TCCCAATTATTCCTTTGGAGCAGTT	7	-	422	1749
ENSDARG00000015537	ENSDART00000038956	24	4	4	CGCGTCTCCGTCCAGTGCAGGTAAC	7	-	294	1749
ENSDARG00000015537	ENSDART00000038956	24	5	5	AGACTCACATATTGGTGTTGGCA	5	-	600	1749
ENSDARG00000015537	ENSDART00000038956	24	6	6	ATCTTCTTCAGCGTGACGTATTC	5	-	652	1749
ENSDARG00000015537	ENSDART00000038956	24	15	15	AAACACACATTGGTATGCTGCGGCT	7	-	1496	1749
ENSDARG00000015537	ENSDART00000038956	24	16	16	GTCTTCAAAGGTAGCGGCTGGATTG	7	-	1689	1749
ENSDARG00000015537	ENSDART00000038956	24	16	16	TACTCCATCATTCTGGCTTTGAT	5	-	1600	1749
ENSDARG00000015567	ENSDART00000016546	24	1	1	GTTTACCACGTTGGAGGACGCGTGC	7	-	456	1332
ENSDARG00000015567	ENSDART00000016546	24	1	1	GGCCCCTGCCCCGTGGTGGGCAGCC	7	-	612	1332
ENSDARG00000015567	ENSDART00000016546	24	1	1	GAAGGCCCCTGCCCCGTGGTGGGCA	7	-	615	1332
ENSDARG00000015567	ENSDART00000016546	24	1	1	GAAGGCCCCTGCCCCGTGGTGGGC	6	-	616	1332
ENSDARG00000015567	ENSDART00000016546	24	1	1	CCCAAAGCCACTTCTCTGTCTGT	5	-	100	1332
ENSDARG00000015567	ENSDART00000016546	24	1	1	AGCGGCGGCGTAACCGGGTGCCTGC	7	-	210	1332
ENSDARG00000015567	ENSDART00000016546	24	1	1	ACCGTCGGCGAACGGATTGATAC	5	-	122	1332
ENSDARG00000015567	ENSDART00000016546	24	1	1	ACCCAAAGCCACTTCTCTGTCTGT	6	-	100	1332
ENSDARG00000015567	ENSDART00000016546	24	1	1	AAAAGCGCCCATACCGTCGGCGAA	6	-	133	1332
ENSDARG00000015567	ENSDART00000016546	24	3	3	GTACCATTCATTAAAATTTGACGAA	7	-	1314	1332
ENSDARG00000015567	ENSDART00000075576	24	1	1	GTTTACCACGTTGGAGGACGCGTGC	7	-	126	885
ENSDARG00000015567	ENSDART00000075576	24	1	1	GGCCCCTGCCCCGTGGTGGGCAGCC	7	-	282	885
ENSDARG00000015567	ENSDART00000075576	24	1	1	GAAGGCCCCTGCCCCGTGGTGGGCA	7	-	285	885
ENSDARG00000015567	ENSDART00000075576	24	1	1	GAAGGCCCCTGCCCCGTGGTGGGC	6	-	286	885
ENSDARG00000015686	ENSDART00000019705	24	1	1	GTAACCTCCGATGTATGAAGTTGGA	7	-	106	1260
ENSDARG00000015686	ENSDART00000019705	24	1	1	GCCAAAGCAGGTCGTGTGGTGGTG	6	-	309	1260
ENSDARG00000015686	ENSDART00000019705	24	1	1	GCCAAAGCAGGTCGTGTGGTGGT	5	-	310	1260
ENSDARG00000015686	ENSDART00000019705	24	1	1	AGCCAAAGCAGGTCGTGTGGTGGTG	7	-	309	1260
ENSDARG00000015686	ENSDART00000019705	24	1	1	AGCCAAAGCAGGTCGTGTGGTGGT	6	-	310	1260
ENSDARG00000015686	ENSDART00000019705	24	4	4	CCCTGCATCCTTTGGACTGATGC	5	-	746	1260
ENSDARG00000015686	ENSDART00000019705	24	6	6	GCATTCTCCGTCACAGTAGTTTGC	6	-	1042	1260
ENSDARG00000015686	ENSDART00000019705	24	6	6	TCCGTCACAGTAGTTTGCTGCGTAG	7	-	1035	1260
ENSDARG00000015686	ENSDART00000019705	24	6	6	TTCTCCGTCACAGTAGTTTGCTGCG	7	-	1038	1260
ENSDARG00000016093	ENSDART00000020931	24	2	2	GCCGTCACACAAGTGTCTGTGGAT	6	+	190	1257
ENSDARG00000016093	ENSDART00000020931	24	2	2	CTCTCCAGATGAAGCTGGAGTTGTC	7	+	11	1257
ENSDARG00000016093	ENSDART00000020931	24	6	6	CTAAGCGTCCTGTGGGTGGATTTG	6	+	644	1257
ENSDARG00000016093	ENSDART00000020931	24	6	6	GACTGCTAAGCGTCCTGTGGGTGGA	7	+	639	1257
ENSDARG00000016093	ENSDART00000020931	24	6	6	CTAAGCGTCCTGTGGGTGGATTT	5	+	644	1257
ENSDARG00000016093	ENSDART00000020931	24	7	7	TTCCCCTTCCAGGTGACGGAGCG	5	+	838	1257
ENSDARG00000016093	ENSDART00000020931	24	9	9	GGCTTCTTCAAAGCGCTGCGGGA	5	+	1180	1257
ENSDARG00000016093	ENSDART00000020931	24	9	9	TCCGGCCGCTTGTGGAGGGCTGC	5	+	1046	1257
ENSDARG00000016093	ENSDART00000106129	24	2	2	GCCGTCACACAAGTGTCTGTGGAT	6	+	190	1257
ENSDARG00000016093	ENSDART00000106129	24	2	2	CTCTCCAGATGAAGCTGGAGTTGTC	7	+	11	1257
ENSDARG00000016093	ENSDART00000106129	24	6	6	CTAAGCGTCCTGTGGGTGGATTTG	6	+	644	1257
ENSDARG00000016093	ENSDART00000106129	24	6	6	GACTGCTAAGCGTCCTGTGGGTGGA	7	+	639	1257
ENSDARG00000016093	ENSDART00000106129	24	6	6	CTAAGCGTCCTGTGGGTGGATTT	5	+	644	1257
ENSDARG00000016093	ENSDART00000106129	24	7	7	TTCCCCTTCCAGGTGACGGAGCG	5	+	838	1257
ENSDARG00000016093	ENSDART00000106129	24	9	9	GGCTTCTTCAAAGCGCTGCGGGA	5	+	1180	1257
ENSDARG00000016093	ENSDART00000106129	24	9	9	TCCGGCCGCTTGTGGAGGGCTGC	5	+	1046	1257
ENSDARG00000016207	ENSDART00000043390	24	5	5	CTAAAAGACAGAGAGGAGATGTC	5	+	526	873
ENSDARG00000016207	ENSDART00000043390	24	7	7	CTACGCTACATGCAGACGCTGAC	5	+	784	873
ENSDARG00000016207	ENSDART00000043390	24	7	7	TTCAGCTACGCTACATGCAGACGCT	7	+	779	873
ENSDARG00000016360	ENSDART00000025348	24	1	1	CTCCTCCTCATCTCATCTGTGTTG	6	-	75	1617
ENSDARG00000016360	ENSDART00000025348	24	1	1	CTCCTCATCTCATCTGTGTTGAGCG	7	-	71	1617
ENSDARG00000016360	ENSDART00000025348	24	1	1	CTCCTCATCTCATCTGTGTTGAG	5	-	73	1617
ENSDARG00000016360	ENSDART00000025348	24	4	4	TCCATCACCTGTAGTGTGCAGTT	5	-	430	1617
ENSDARG00000016360	ENSDART00000025348	24	4	4	AACCTCATCAATAGGGGGATTAG	5	-	353	1617
ENSDARG00000016360	ENSDART00000025348	24	7	7	GGCAAAATCCGGTGGTGGATTTTTC	7	-	738	1617
ENSDARG00000016360	ENSDART00000025348	24	7	7	GGCAAAATCCGGTGGTGGATTTT	5	-	740	1617
ENSDARG00000016360	ENSDART00000025348	24	7	7	GCAAAATCCGGTGGTGGATTTTTC	6	-	738	1617
ENSDARG00000016360	ENSDART00000025348	24	9	9	AGACACCACCTTATATTCTGCATGT	7	-	930	1617
ENSDARG00000016360	ENSDART00000025348	24	9	9	CCCCACGGCTCTTAGAGCAGGAGAC	7	-	951	1617
ENSDARG00000016360	ENSDART00000025348	24	9	9	GACACCACCTTATATTCTGCATGT	6	-	930	1617
ENSDARG00000016360	ENSDART00000025348	24	10	10	TACTCAGCAAGTGAAGAAGACTTT	6	-	1034	1617
ENSDARG00000016360	ENSDART00000025348	24	10	10	CTACTCAGCAAGTGAAGAAGACTTT	7	-	1034	1617
ENSDARG00000016360	ENSDART00000025348	24	11	11	GAATACTTATTAATGGGGGGAAC	5	-	1155	1617
ENSDARG00000016360	ENSDART00000025348	24	11	11	AAACTCAGCTACTTGCAGAATAC	5	-	1172	1617
ENSDARG00000016360	ENSDART00000025348	24	12	12	TGCCTCCTCGATGAGGGCGCAGTA	6	-	1411	1617
ENSDARG00000016360	ENSDART00000025348	24	13	13	AACTGCTGCTGCTGGAGGTCGAC	5	-	1561	1617
ENSDARG00000016360	ENSDART00000025348	24	13	13	AGCCTCGCACTGCTGGAAGAGGAA	6	-	1582	1617
ENSDARG00000016360	ENSDART00000025348	24	13	13	TTCATCATCGGTGCTGAAGTAGCG	6	-	1516	1617
ENSDARG00000016393	ENSDART00000007381	24	3	2	GCCTCCAAAGTGGTCTGATTTTGTC	7	-	223	543
ENSDARG00000016393	ENSDART00000007381	24	4	3	TCCCGCAACTCGTCTTCTGCTAAC	6	-	339	543
ENSDARG00000016393	ENSDART00000007381	24	5	4	CTCAGCTGCGTTCATGGCGTTGGGA	7	-	399	543
ENSDARG00000016393	ENSDART00000007381	24	5	4	CTCAGCTGCGTTCATGGCGTTGGG	6	-	400	543
ENSDARG00000016393	ENSDART00000007381	24	5	4	CCCGTCTCCACTGGTGGCGCAGGT	6	-	481	543
ENSDARG00000016490	ENSDART00000010764	24	1	1	GTCGACCTCAGATAAGGCTTGAGTC	7	-	1437	3549
ENSDARG00000016490	ENSDART00000010764	24	1	1	TTCTCCACCTTGAAGTTTGGGTA	5	-	854	3549
ENSDARG00000016490	ENSDART00000010764	24	1	1	GTTAGCATCTAGCCTTTGGGGCT	5	-	917	3549
ENSDARG00000016490	ENSDART00000010764	24	1	1	TACCTCATCCATTGGAAGTGTTG	5	-	821	3549
ENSDARG00000016490	ENSDART00000010764	24	1	1	TTCTCCACCTTGAAGTTTGGGTAA	6	-	853	3549
ENSDARG00000016490	ENSDART00000010764	24	1	1	TTCTTCACAAAGTTCTGTTTTGGG	6	-	1111	3549
ENSDARG00000016490	ENSDART00000010764	24	1	1	TTCTTCACAAAGTTCTGTTTTGGGT	7	-	1110	3549
ENSDARG00000016490	ENSDART00000010764	24	1	1	GGCTTCGCAAACAATGTTGTCTGT	6	-	1495	3549
ENSDARG00000016490	ENSDART00000010764	24	1	1	ACCATCTCCTTTGAGATCTTGGGAA	7	-	264	3549
ENSDARG00000016490	ENSDART00000010764	24	1	1	ACAGTCAGACAGTTTTGGGAGTTC	6	-	1564	3549
ENSDARG00000016490	ENSDART00000010764	24	1	1	CAATTCTTCACAAAGTTCTGTTTTG	7	-	1113	3549
ENSDARG00000016490	ENSDART00000010764	24	2	2	TTCGGCTCCGTAGGCTTTTGCGAAC	7	-	2208	3549
ENSDARG00000016490	ENSDART00000010764	24	2	2	AGCTTCACCTGATTGGCTAGTAG	5	-	1766	3549
ENSDARG00000016490	ENSDART00000010764	24	2	2	GTCGGCAGAGCGTCTGAGGCCTTG	6	-	2031	3549
ENSDARG00000016490	ENSDART00000010764	24	2	2	AAATCCACAGGCGCAATTTGGAGCG	7	-	2060	3549
ENSDARG00000016490	ENSDART00000010764	24	2	2	AAAGACATCTCTGTGTGAGGGAGGA	7	-	1911	3549
ENSDARG00000016490	ENSDART00000010764	24	2	2	GAAATCCTCCTGATGTGTAGGCA	5	-	1820	3549
ENSDARG00000016490	ENSDART00000010764	24	2	2	GAAAACTGCTCTGAGAGCAGACTGC	7	-	2130	3549
ENSDARG00000016490	ENSDART00000010764	24	4	4	GTCTCCATCTGTGAGTGTGTTTTC	6	-	2428	3549
ENSDARG00000016490	ENSDART00000010764	24	5	5	TACCTATTCATCTCTAGCAGCTGCA	7	-	2576	3549
ENSDARG00000016490	ENSDART00000010764	24	5	5	CTATTCATCTCTAGCAGCTGCAGTC	7	-	2573	3549
ENSDARG00000016490	ENSDART00000010764	24	7	7	AGCTGCTCCTCCAGAGCGTTTGCG	6	-	2790	3549
ENSDARG00000016490	ENSDART00000010764	24	9	9	TTCTCCTTCTGGTTGGTGTGTCGTT	7	-	3110	3549
ENSDARG00000016490	ENSDART00000010764	24	10	10	GTCTCCAACTTGAACAGCTGCAGGT	7	-	3182	3549
ENSDARG00000016490	ENSDART00000010764	24	11	11	GACCTCAGCGCGGGAGACGTTGTT	6	-	3427	3549
ENSDARG00000016490	ENSDART00000105654	24	1	1	TACCTATTCATCTCTAGCAGCTGCA	7	-	146	1167
ENSDARG00000016490	ENSDART00000105654	24	1	1	CTATTCATCTCTAGCAGCTGCAGTC	7	-	143	1167
ENSDARG00000016490	ENSDART00000105654	24	6	6	AGCTGCTCCTCCAGAGCGTTTGCG	6	-	408	1167
ENSDARG00000016490	ENSDART00000105654	24	8	8	TTCTCCTTCTGGTTGGTGTGTCGTT	7	-	728	1167
ENSDARG00000016490	ENSDART00000105654	24	9	9	GTCTCCAACTTGAACAGCTGCAGGT	7	-	800	1167
ENSDARG00000016490	ENSDART00000105654	24	10	10	GACCTCAGCGCGGGAGACGTTGTT	6	-	1045	1167
ENSDARG00000016496	ENSDART00000007066	24	4	4	AGCCTCTTCAGCTGCCGCGTGGGAT	7	+	365	1395
ENSDARG00000016496	ENSDART00000007066	24	4	4	AGCCTCTAAGGCCAATAAGAAGCC	6	+	345	1395
ENSDARG00000016496	ENSDART00000007066	24	4	4	TCCTGCACAGAGACCTGGTGAGGT	6	+	449	1395
ENSDARG00000016496	ENSDART00000007066	24	4	4	TCCTGCACAGAGACCTGGTGAGGTT	7	+	449	1395
ENSDARG00000016496	ENSDART00000007066	24	4	4	TTCAGCTGCCGCGTGGGATGGTAA	6	+	371	1395
ENSDARG00000016496	ENSDART00000007066	24	4	4	CTCTTCAGCTGCCGCGTGGGATGGT	7	+	368	1395
ENSDARG00000016496	ENSDART00000007066	24	6	6	TACACCAAAGCCATCGGTGAGGCC	6	+	640	1395
ENSDARG00000016496	ENSDART00000007066	24	6	6	AGCACCAGAGTTGCTGCTGGGAG	5	+	609	1395
ENSDARG00000016496	ENSDART00000007066	24	8	8	TTCTCAGACAAAGACTGGGAGGAC	6	+	793	1395
ENSDARG00000016496	ENSDART00000007066	24	12	12	GCACAAGGCCCGCCTCTGAAGAA	5	+	1198	1395
ENSDARG00000016496	ENSDART00000007066	24	12	12	AACAACCACACCAATGGGGCAGGG	6	+	1147	1395
ENSDARG00000016496	ENSDART00000007066	24	12	12	AAAACCAGCAGCAGCAGCAGCAGGG	7	+	1121	1395
ENSDARG00000016496	ENSDART00000007066	24	12	12	AACCGCAGAAAAACCAGCAGCAGCA	7	+	1112	1395
ENSDARG00000016496	ENSDART00000007066	24	12	12	ACAACCACACCAATGGGGCAGGG	5	+	1148	1395
ENSDARG00000016496	ENSDART00000007066	24	12	12	ACCAGCAGCAGCAGCAGCAGGGGAA	7	+	1124	1395
ENSDARG00000016496	ENSDART00000007066	24	12	12	AGAAAAACCAGCAGCAGCAGCAGCA	7	+	1118	1395
ENSDARG00000016505	ENSDART00000021981	24	6	6	GTCCTCAAAGGCCCGCTCTGTGGAG	7	-	651	1938
ENSDARG00000016505	ENSDART00000021981	24	6	6	GAACACTTCGTACTTGTGTTTTTT	6	-	745	1938
ENSDARG00000016505	ENSDART00000021981	24	6	6	GAACACTTCGTACTTGTGTTTTT	5	-	746	1938
ENSDARG00000016505	ENSDART00000021981	24	8	8	TACAACCCCGAGGCCCGGAGCAGAA	7	-	950	1938
ENSDARG00000016505	ENSDART00000021981	24	12	12	GTTTTCCACTGGAGGCTGAGGAG	5	-	1355	1938
ENSDARG00000016505	ENSDART00000021981	24	13	13	GTCCTCTTAGGTGGAGGTGGAGCC	6	-	1842	1938
ENSDARG00000016505	ENSDART00000021981	24	13	13	GTTGGCGGCTGGTGCTGGAGCTGGT	7	-	1791	1938
ENSDARG00000016505	ENSDART00000021981	24	13	13	GTAGTCCTCTTAGGTGGAGGTGGAG	7	-	1844	1938
ENSDARG00000016505	ENSDART00000021981	24	13	13	GTAGTCCTCTTAGGTGGAGGTGGA	6	-	1845	1938
ENSDARG00000016505	ENSDART00000021981	24	13	13	GCCTGCAGATGTAAAAGCAGGAGGA	7	-	1731	1938
ENSDARG00000016505	ENSDART00000021981	24	13	13	GACCCAAAACTAGGTGGTGGAGGAG	7	-	1646	1938
ENSDARG00000016505	ENSDART00000021981	24	13	13	GACCCAAAACTAGGTGGTGGAGGA	6	-	1647	1938
ENSDARG00000016505	ENSDART00000021981	24	13	13	GAAGTCGCCACCTGAGGGCGCTGTT	7	-	1878	1938
ENSDARG00000016505	ENSDART00000021981	24	13	13	AGACCCAAAACTAGGTGGTGGAGGA	7	-	1647	1938
ENSDARG00000016505	ENSDART00000021981	24	13	13	AGACCCAAAACTAGGTGGTGGAG	5	-	1649	1938
ENSDARG00000016505	ENSDART00000021981	24	13	13	ACCCAAAACTAGGTGGTGGAGGAG	6	-	1646	1938
ENSDARG00000016505	ENSDART00000021981	24	13	13	ACCCAAAACTAGGTGGTGGAGGA	5	-	1647	1938
ENSDARG00000016754	ENSDART00000023997	24	1	1	GACAAATAAAAATCAAGACGGGTGT	7	+	29	324
ENSDARG00000016754	ENSDART00000023997	24	3	3	ACCTGCAGCAACTATTGGTGAGAA	6	+	239	324
ENSDARG00000016794	ENSDART00000005845	24	3	3	TTAGGCTTCTGAGACCGGGTGGGTA	7	+	299	1929
ENSDARG00000016794	ENSDART00000005845	24	3	3	GACATCTACAGCTCTCTGCTTAG	5	+	280	1929
ENSDARG00000016794	ENSDART00000005845	24	3	3	CACATCGCCTCCGTGGAGAAGCT	5	+	166	1929
ENSDARG00000016794	ENSDART00000005845	24	3	3	ATCTACAGCTCTCTGCTTAGGCTTC	7	+	283	1929
ENSDARG00000016794	ENSDART00000005845	24	3	3	ATCTACAGCTCTCTGCTTAGGCT	5	+	283	1929
ENSDARG00000016794	ENSDART00000005845	24	3	3	ATCGCCTCCGTGGAGAAGCTGTC	5	+	169	1929
ENSDARG00000016794	ENSDART00000005845	24	5	5	AAATTCAGAAGCAAAGGCCGCTTTC	7	+	547	1929
ENSDARG00000016794	ENSDART00000005845	24	6	6	GTAGTCAGCCTCTTTCTGGCTTC	5	+	620	1929
ENSDARG00000016794	ENSDART00000005845	24	6	6	GGCTTCAGCGCTCGCTGTTTGGAA	6	+	637	1929
ENSDARG00000016794	ENSDART00000005845	24	7	7	ATCCGCTTCCAGTTTGTGGGCATTG	7	+	802	1929
ENSDARG00000016794	ENSDART00000005845	24	7	7	TGCAAAAGCTTCTAGAAGGTTTG	5	+	854	1929
ENSDARG00000016794	ENSDART00000005845	24	8	8	ATCAAAGCCATCATGGATGCAGCT	6	+	943	1929
ENSDARG00000016794	ENSDART00000005845	24	9	9	ACCATCAAAGGTTTCATGGTAGGAA	7	+	1090	1929
ENSDARG00000016794	ENSDART00000005845	24	11	11	ACACAATTCCTTGAGTGTGTTTGGC	7	+	1204	1929
ENSDARG00000016794	ENSDART00000005845	24	14	14	AGAAGCTGCAGAATTTAGGTGTG	5	+	1619	1929
ENSDARG00000016794	ENSDART00000005845	24	14	14	TCCACCAGCTCTCACTGGAGGAGAA	7	+	1794	1929
ENSDARG00000016794	ENSDART00000005845	24	14	14	AGCTGCAGAATTTAGGTGTGAGCA	6	+	1622	1929
ENSDARG00000016897	ENSDART00000042943	24	3	3	TCCTTCAGCAGCACGGCTGGGTTT	6	+	430	1272
ENSDARG00000016897	ENSDART00000042943	24	3	3	TTCAACCACATCACCTCTGTTGAG	6	+	484	1272
ENSDARG00000016897	ENSDART00000042943	24	3	3	TTCAGCAGCACGGCTGGGTTTGT	5	+	433	1272
ENSDARG00000016897	ENSDART00000042943	24	3	3	TTCAGCAGCACGGCTGGGTTTGTG	6	+	433	1272
ENSDARG00000016897	ENSDART00000042943	24	3	3	TTCAGCAGCACGGCTGGGTTTGTGT	7	+	433	1272
ENSDARG00000016897	ENSDART00000042943	24	3	3	AACCACATCACCTCTGTTGAGGTT	6	+	487	1272
ENSDARG00000016897	ENSDART00000042943	24	3	3	AACCACATCACCTCTGTTGAGGT	5	+	487	1272
ENSDARG00000016897	ENSDART00000042943	24	3	3	TCCTTCAGCAGCACGGCTGGGTT	5	+	430	1272
ENSDARG00000016897	ENSDART00000042943	24	6	6	GAAGCCAGAGTCAGGGCTTTGTT	5	+	760	1272
ENSDARG00000016897	ENSDART00000042943	24	6	6	GAAGCCAGAGTCAGGGCTTTGTTT	6	+	760	1272
ENSDARG00000016897	ENSDART00000042943	24	8	8	TACCAAGACTCAGAGGGGAGGGT	5	+	1159	1272
ENSDARG00000016897	ENSDART00000042943	24	8	8	GAAGCCAAACAGCCTTTTTGGTGTG	7	+	1054	1272
ENSDARG00000016897	ENSDART00000042943	24	8	8	GAAGCCAAACAGCCTTTTTGGTG	5	+	1054	1272
ENSDARG00000016897	ENSDART00000042943	24	8	8	AGCCAAACAGCCTTTTTGGTGTG	5	+	1056	1272
ENSDARG00000016897	ENSDART00000042943	24	8	8	AGACTCAGAGGGGAGGGTGGAGAT	6	+	1164	1272
ENSDARG00000017235	ENSDART00000009609	24	1	1	AGCCCCGGCATCTCCGCTGGCGAA	6	-	31	465
ENSDARG00000017235	ENSDART00000009609	24	1	1	CACAAACCCGTTCTTGCGCAGGG	5	-	83	465
ENSDARG00000017235	ENSDART00000009609	24	3	3	TTCACCAGCTGCAAATTTGTTTTC	6	-	382	465
ENSDARG00000017910	ENSDART00000040865	24	3	3	AACTGCAGCTGACTCGGGGCGTTG	6	-	230	1233
ENSDARG00000017910	ENSDART00000040865	24	6	6	AGCCAATGCCATGGACGCCGCTGAC	7	-	633	1233
ENSDARG00000017910	ENSDART00000040865	24	9	9	CCCAGCTTCAGGTCAGCGGCCGAC	6	-	963	1233
ENSDARG00000017910	ENSDART00000040865	24	9	9	TCCCCAGACAGTTGGCATTGGAG	5	-	936	1233
ENSDARG00000017910	ENSDART00000040865	24	9	9	TTCCCCAGACAGTTGGCATTGGAG	6	-	936	1233
ENSDARG00000017910	ENSDART00000040865	24	10	10	CACATCTCCATCAGAGCTGAAGCG	6	-	1054	1233
ENSDARG00000017929	ENSDART00000017165	24	3	3	TGCTGCAGCCAATGAGGATGAAGTG	7	+	279	4515
ENSDARG00000017929	ENSDART00000017165	24	3	3	AGCTGCTGCAGCCAATGAGGATGAA	7	+	276	4515
ENSDARG00000017929	ENSDART00000017165	24	3	3	CTCTGCAGAGAAAGCTGCTGCAGCC	7	+	264	4515
ENSDARG00000017929	ENSDART00000017165	24	5	5	AGCCACACCTTCAACTGCCGCATGC	7	+	595	4515
ENSDARG00000017929	ENSDART00000017165	24	5	5	AGACTATGCAGTGTTTTGCTGTG	5	+	680	4515
ENSDARG00000017929	ENSDART00000017165	24	5	5	ACCCTCACAGCGAGGCCGAAGAG	5	+	626	4515
ENSDARG00000017929	ENSDART00000017165	24	5	5	ACCAAAGTCCATCAAGGAGGAGGGA	7	+	708	4515
ENSDARG00000017929	ENSDART00000017165	24	5	5	ACCAAAGTCCATCAAGGAGGAGGG	6	+	708	4515
ENSDARG00000017929	ENSDART00000017165	24	7	7	TTCATCTTCAGAACGATGGAGAC	5	+	926	4515
ENSDARG00000017929	ENSDART00000017165	24	9	9	ACCCCCTCCAATGGCCGGTGGAGAA	7	+	1944	4515
ENSDARG00000017929	ENSDART00000017165	24	9	9	CACCCCCTCCAATGGCCGGTGGA	5	+	1943	4515
ENSDARG00000017929	ENSDART00000017165	24	9	9	CCCAGCTGCACATTCGGTAGCAGTA	7	+	1680	4515
ENSDARG00000017929	ENSDART00000017165	24	9	9	GGCCACCCCTCAGGGCAGCGGGT	5	+	1365	4515
ENSDARG00000017929	ENSDART00000017165	24	9	9	TTCACCCCCTCCAATGGCCGGTGGA	7	+	1941	4515
ENSDARG00000017929	ENSDART00000017165	24	9	9	GGCTACGACCGTGTGGAGCCGGT	5	+	2356	4515
ENSDARG00000017929	ENSDART00000017165	24	9	9	ACATGCTACCTCCCTGAAGGAGAA	6	+	2031	4515
ENSDARG00000017929	ENSDART00000017165	24	10	10	AACAGCAGAGAGCACTGCAGACTGC	7	+	2537	4515
ENSDARG00000017929	ENSDART00000017165	24	10	10	GCAGTCAGCCAACAGAGTGAGTA	5	+	2560	4515
ENSDARG00000017929	ENSDART00000017165	24	11	11	AGCTCCTCCGGTCAGAAGCGTGT	5	+	2610	4515
ENSDARG00000017929	ENSDART00000017165	24	11	11	CCCCTACTCAATCATGCAGCAGCA	6	+	2697	4515
ENSDARG00000017929	ENSDART00000017165	24	12	12	GCATGCAGCAGGACGGTTGGGGT	5	+	2807	4515
ENSDARG00000017929	ENSDART00000017165	24	12	12	GACCAATGCTGCAACCGCAGATGAT	7	+	2978	4515
ENSDARG00000017929	ENSDART00000017165	24	12	12	GCATGCAGCAGGACGGTTGGGGTG	6	+	2807	4515
ENSDARG00000017929	ENSDART00000017165	24	12	12	CAATGCTGCAACCGCAGATGATGGC	7	+	2981	4515
ENSDARG00000017929	ENSDART00000017165	24	14	14	CTACTCGGCCCTCAAAGATTTTGAT	7	+	3228	4515
ENSDARG00000017929	ENSDART00000017165	24	15	15	GACTCAGACCCGGTGGAGTCGTC	5	+	3521	4515
ENSDARG00000017929	ENSDART00000017165	24	15	15	GTCCCCGGCAAACATGCAGCAGGC	6	+	3399	4515
ENSDARG00000017929	ENSDART00000017165	24	17	17	AGCAACAGCAACAGCAGCAGCAGCA	7	+	3767	4515
ENSDARG00000017929	ENSDART00000017165	24	17	17	TGCCACCCAACATGGCGGCAGCC	5	+	3827	4515
ENSDARG00000017929	ENSDART00000017165	24	17	17	CCCAGCGGCAGAGAGAGTTGCTGAG	7	+	3704	4515
ENSDARG00000017929	ENSDART00000017165	24	17	17	AACAGCAACAGCAGCAGCAGCAGCG	7	+	3770	4515
ENSDARG00000017929	ENSDART00000017165	24	17	17	AGCGGCAGAGAGAGTTGCTGAGTA	6	+	3707	4515
ENSDARG00000017929	ENSDART00000017165	24	17	17	GGCAGCAACAGCAACAGCAGCAGCA	7	+	3764	4515
ENSDARG00000017929	ENSDART00000017165	24	17	17	ACAATCAACGCTCAGATGCTGGC	5	+	3682	4515
ENSDARG00000017929	ENSDART00000017165	24	17	17	AGCGGCAGAGAGAGTTGCTGAGTAA	7	+	3707	4515
ENSDARG00000017929	ENSDART00000017165	24	17	17	AGCGGCAGCTCGACCAGCAGCGGCA	7	+	3743	4515
ENSDARG00000017929	ENSDART00000017165	24	17	17	CACCCAACATGGCGGCAGCCGCA	5	+	3830	4515
ENSDARG00000017929	ENSDART00000017165	24	18	18	GCAGTCAGACGGTGGGTTTGGTGGT	7	+	4152	4515
ENSDARG00000017929	ENSDART00000017165	24	18	18	GCAGTCAGACGGTGGGTTTGGTG	5	+	4152	4515
ENSDARG00000017929	ENSDART00000017165	24	18	18	AACATCAACACCAACAGGTGGAGCT	7	+	4303	4515
ENSDARG00000017929	ENSDART00000105969	24	1	1	CTACTCGGCCCTCAAAGATTTTGAT	7	+	96	1296
ENSDARG00000017929	ENSDART00000105969	24	3	3	GACTCAGACCCGGTGGAGTCGTC	5	+	278	1296
ENSDARG00000017929	ENSDART00000105969	24	4	4	TCCCAACGCTCTTGAGTTTGTGTTT	7	+	396	1296
ENSDARG00000017929	ENSDART00000105969	24	5	5	TGCCACCCAACATGGCGGCAGCC	5	+	614	1296
ENSDARG00000017929	ENSDART00000105969	24	5	5	AACAGCAACAGCAGCAGCAGCAGCG	7	+	557	1296
ENSDARG00000017929	ENSDART00000105969	24	5	5	CCCAGCGGCAGAGAGAGTTGCTGAG	7	+	491	1296
ENSDARG00000017929	ENSDART00000105969	24	5	5	CACCCAACATGGCGGCAGCCGCA	5	+	617	1296
ENSDARG00000017929	ENSDART00000105969	24	5	5	AGCGGCAGCTCGACCAGCAGCGGCA	7	+	530	1296
ENSDARG00000017929	ENSDART00000105969	24	5	5	AGCGGCAGAGAGAGTTGCTGAGTAA	7	+	494	1296
ENSDARG00000017929	ENSDART00000105969	24	5	5	AGCGGCAGAGAGAGTTGCTGAGTA	6	+	494	1296
ENSDARG00000017929	ENSDART00000105969	24	5	5	AGCAACAGCAACAGCAGCAGCAGCA	7	+	554	1296
ENSDARG00000017929	ENSDART00000105969	24	5	5	ACAATCAACGCTCAGATGCTGGC	5	+	469	1296
ENSDARG00000017929	ENSDART00000105969	24	5	5	GGCAGCAACAGCAACAGCAGCAGCA	7	+	551	1296
ENSDARG00000017929	ENSDART00000105969	24	6	6	AACATCAACACCAACAGGTGGAGCT	7	+	1090	1296
ENSDARG00000017929	ENSDART00000105969	24	6	6	GCAGTCAGACGGTGGGTTTGGTGGT	7	+	939	1296
ENSDARG00000017929	ENSDART00000105969	24	6	6	GCAGTCAGACGGTGGGTTTGGTG	5	+	939	1296
ENSDARG00000017929	ENSDART00000105971	24	2	2	AGACTATGCAGTGTTTTGCTGTG	5	+	323	4158
ENSDARG00000017929	ENSDART00000105971	24	2	2	ACCCTCACAGCGAGGCCGAAGAG	5	+	269	4158
ENSDARG00000017929	ENSDART00000105971	24	2	2	ACCAAAGTCCATCAAGGAGGAGGGA	7	+	351	4158
ENSDARG00000017929	ENSDART00000105971	24	2	2	ACCAAAGTCCATCAAGGAGGAGGG	6	+	351	4158
ENSDARG00000017929	ENSDART00000105971	24	2	2	AGCCACACCTTCAACTGCCGCATGC	7	+	238	4158
ENSDARG00000017929	ENSDART00000105971	24	4	4	TTCATCTTCAGAACGATGGAGAC	5	+	569	4158
ENSDARG00000017929	ENSDART00000105971	24	6	6	GGCCACCCCTCAGGGCAGCGGGT	5	+	1008	4158
ENSDARG00000017929	ENSDART00000105971	24	6	6	GGCTACGACCGTGTGGAGCCGGT	5	+	1999	4158
ENSDARG00000017929	ENSDART00000105971	24	6	6	CACCCCCTCCAATGGCCGGTGGA	5	+	1586	4158
ENSDARG00000017929	ENSDART00000105971	24	6	6	TTCACCCCCTCCAATGGCCGGTGGA	7	+	1584	4158
ENSDARG00000017929	ENSDART00000105971	24	6	6	CCCAGCTGCACATTCGGTAGCAGTA	7	+	1323	4158
ENSDARG00000017929	ENSDART00000105971	24	6	6	ACATGCTACCTCCCTGAAGGAGAA	6	+	1674	4158
ENSDARG00000017929	ENSDART00000105971	24	6	6	ACCCCCTCCAATGGCCGGTGGAGAA	7	+	1587	4158
ENSDARG00000017929	ENSDART00000105971	24	7	7	GCAGTCAGCCAACAGAGTGAGTA	5	+	2203	4158
ENSDARG00000017929	ENSDART00000105971	24	7	7	AACAGCAGAGAGCACTGCAGACTGC	7	+	2180	4158
ENSDARG00000017929	ENSDART00000105971	24	8	8	CCCCTACTCAATCATGCAGCAGCA	6	+	2340	4158
ENSDARG00000017929	ENSDART00000105971	24	8	8	AGCTCCTCCGGTCAGAAGCGTGT	5	+	2253	4158
ENSDARG00000017929	ENSDART00000105971	24	9	9	GACCAATGCTGCAACCGCAGATGAT	7	+	2621	4158
ENSDARG00000017929	ENSDART00000105971	24	9	9	GCATGCAGCAGGACGGTTGGGGT	5	+	2450	4158
ENSDARG00000017929	ENSDART00000105971	24	9	9	GCATGCAGCAGGACGGTTGGGGTG	6	+	2450	4158
ENSDARG00000017929	ENSDART00000105971	24	9	9	CAATGCTGCAACCGCAGATGATGGC	7	+	2624	4158
ENSDARG00000017929	ENSDART00000105971	24	11	11	CTACTCGGCCCTCAAAGATTTTGAT	7	+	2871	4158
ENSDARG00000017929	ENSDART00000105971	24	12	12	GTCCCCGGCAAACATGCAGCAGGC	6	+	3042	4158
ENSDARG00000017929	ENSDART00000105971	24	12	12	GACTCAGACCCGGTGGAGTCGTC	5	+	3164	4158
ENSDARG00000017929	ENSDART00000105971	24	14	14	TGCCACCCAACATGGCGGCAGCC	5	+	3470	4158
ENSDARG00000017929	ENSDART00000105971	24	14	14	ACAATCAACGCTCAGATGCTGGC	5	+	3325	4158
ENSDARG00000017929	ENSDART00000105971	24	14	14	GGCAGCAACAGCAACAGCAGCAGCA	7	+	3407	4158
ENSDARG00000017929	ENSDART00000105971	24	14	14	AGCGGCAGAGAGAGTTGCTGAGTA	6	+	3350	4158
ENSDARG00000017929	ENSDART00000105971	24	14	14	AGCGGCAGAGAGAGTTGCTGAGTAA	7	+	3350	4158
ENSDARG00000017929	ENSDART00000105971	24	14	14	AGCAACAGCAACAGCAGCAGCAGCA	7	+	3410	4158
ENSDARG00000017929	ENSDART00000105971	24	14	14	AGCGGCAGCTCGACCAGCAGCGGCA	7	+	3386	4158
ENSDARG00000017929	ENSDART00000105971	24	14	14	AACAGCAACAGCAGCAGCAGCAGCG	7	+	3413	4158
ENSDARG00000017929	ENSDART00000105971	24	14	14	CACCCAACATGGCGGCAGCCGCA	5	+	3473	4158
ENSDARG00000017929	ENSDART00000105971	24	14	14	CCCAGCGGCAGAGAGAGTTGCTGAG	7	+	3347	4158
ENSDARG00000017929	ENSDART00000105971	24	15	15	AACATCAACACCAACAGGTGGAGCT	7	+	3946	4158
ENSDARG00000017929	ENSDART00000105971	24	15	15	GCAGTCAGACGGTGGGTTTGGTGGT	7	+	3795	4158
ENSDARG00000017929	ENSDART00000105971	24	15	15	GCAGTCAGACGGTGGGTTTGGTG	5	+	3795	4158
ENSDARG00000018066	ENSDART00000026599	24	2	2	TACAAAGCCCTGGCTGGGTCTGC	5	+	897	2667
ENSDARG00000018066	ENSDART00000026599	24	2	2	GTTCAATGCGAGACTGTGTGCGTAC	7	+	875	2667
ENSDARG00000018066	ENSDART00000026599	24	2	2	GTACAAAGCCCTGGCTGGGTCTGC	6	+	896	2667
ENSDARG00000018066	ENSDART00000026599	24	2	2	GGCTCATCCGGAGCTTAGTTTAC	5	+	741	2667
ENSDARG00000018066	ENSDART00000026599	24	2	2	CTCTTCAGCCTGGCTGTGTGTCTCT	7	+	832	2667
ENSDARG00000018066	ENSDART00000026599	24	2	2	CTCTTCAGCCTGGCTGTGTGTCT	5	+	832	2667
ENSDARG00000018066	ENSDART00000026599	24	3	3	GAAAACAAACGAGAGGAGATGTC	5	+	1978	2667
ENSDARG00000018066	ENSDART00000026599	24	3	3	TGCAGCAGAAGCCAGCATGGTAC	5	+	1364	2667
ENSDARG00000018066	ENSDART00000026599	24	3	3	AAAGCCACCTACTGGTAGCCTTT	5	+	1451	2667
ENSDARG00000018066	ENSDART00000026599	24	3	3	ATCGTCACAGTTTGTTCTGCAGGC	6	+	1319	2667
ENSDARG00000018066	ENSDART00000026599	24	3	3	GTACACACATTACAACGAGGAGGCC	7	+	1398	2667
ENSDARG00000018066	ENSDART00000026599	24	3	3	GAAAGCCACCTACTGGTAGCCTTT	6	+	1450	2667
ENSDARG00000018285	ENSDART00000003789	24	1	1	TACTTCACCTTTCAGGACGAGGAG	6	+	121	1353
ENSDARG00000018285	ENSDART00000003789	24	1	1	AGCGCCACATAATGAAGGAGAATAA	7	+	29	1353
ENSDARG00000018285	ENSDART00000003789	24	1	1	AGAAGCGCCACATAATGAAGGAGAA	7	+	26	1353
ENSDARG00000018285	ENSDART00000003789	24	3	3	ACATTCAAATAACTGATTTTGGC	5	+	338	1353
ENSDARG00000018285	ENSDART00000003789	24	4	4	GAAATCTGCCTGCAAGAGGTAAAC	6	+	453	1353
ENSDARG00000018285	ENSDART00000003789	24	5	5	ATCATCTACCAGCTTGTTGCTGGT	6	+	496	1353
ENSDARG00000018285	ENSDART00000003789	24	7	7	GGCGGCTACGGTCCGTTGAAGTC	5	+	676	1353
ENSDARG00000018285	ENSDART00000003789	24	11	11	AGAAAATCCAAGAAGTCTGGCGAA	6	+	1307	1353
ENSDARG00000018459	ENSDART00000020204	24	4	4	AGAAGCAAAATATGACGCAGGAGCT	7	+	315	552
ENSDARG00000018459	ENSDART00000020204	24	4	4	GTCATCTGCAAACATGTGAGTCT	5	+	445	552
ENSDARG00000018461	ENSDART00000009687	24	2	1	GCCTCATTATTTGAGTGCAGATTCT	7	-	26	537
ENSDARG00000018461	ENSDART00000009687	24	3	2	TTCGTCCTCCTCTTGTGTTTTGAT	6	-	212	537
ENSDARG00000018461	ENSDART00000009687	24	3	2	GACCGCAACAGTCTGAAGAAGGA	5	-	236	537
ENSDARG00000018461	ENSDART00000009687	24	5	4	TCCGCCATCTTGCCGTGTGGGTC	5	-	481	537
ENSDARG00000018491	ENSDART00000018868	24	1	1	GTCTTCGCATCGGTGTGGTTTAA	5	-	62	1926
ENSDARG00000018491	ENSDART00000018868	24	1	1	ATCGTCTTCGCATCGGTGTGGTTT	6	-	64	1926
ENSDARG00000018491	ENSDART00000018868	24	1	1	ATCGTCTTCGCATCGGTGTGGTT	5	-	65	1926
ENSDARG00000018491	ENSDART00000018868	24	2	2	AACTCCACCAATACGGTGTCTTT	5	-	235	1926
ENSDARG00000018491	ENSDART00000018868	24	2	2	AAACTCCACCAATACGGTGTCTTT	6	-	235	1926
ENSDARG00000018491	ENSDART00000018868	24	2	2	CTCTTCTCCCAGATCTTCTGCTGAA	7	-	99	1926
ENSDARG00000018491	ENSDART00000018868	24	3	3	GCCCAAACCACTGGCTTTAGTGGCA	7	-	363	1926
ENSDARG00000018491	ENSDART00000018868	24	3	3	CCCAAACCACTGGCTTTAGTGGCA	6	-	363	1926
ENSDARG00000018491	ENSDART00000018868	24	6	6	CGCTGCATCTTCATCGCTGGAGAA	6	-	934	1926
ENSDARG00000018491	ENSDART00000018868	24	6	6	TGCATCTTCATCGCTGGAGAAAAC	6	-	931	1926
ENSDARG00000018491	ENSDART00000018868	24	8	8	ACAACCACAAGTGGTCGCTTGGTGT	7	-	1226	1926
ENSDARG00000018491	ENSDART00000018868	24	9	9	TCCTCCAAAACTGTGTGGCTGAGTG	7	-	1282	1926
ENSDARG00000018491	ENSDART00000018868	24	9	9	TCCTCCAAAACTGTGTGGCTGAG	5	-	1284	1926
ENSDARG00000018491	ENSDART00000018868	24	9	9	TGCTCCTCCAAAACTGTGTGGCT	5	-	1287	1926
ENSDARG00000018491	ENSDART00000018868	24	9	9	CTCCAAAACTGTGTGGCTGAGTG	5	-	1282	1926
ENSDARG00000018491	ENSDART00000018868	24	10	10	GCCACCTTCAAATTTGATGGGGTT	6	-	1837	1926
ENSDARG00000018491	ENSDART00000018868	24	10	10	GACCGCACCACGGGGCATAGAAC	5	-	1647	1926
ENSDARG00000018491	ENSDART00000018868	24	10	10	ACCTTCACCGGTCCTTTGTTGTT	5	-	1564	1926
ENSDARG00000018491	ENSDART00000018868	24	10	10	ACCTTCAAATTTGATGGGGTTCT	5	-	1835	1926
ENSDARG00000018491	ENSDART00000081851	24	1	1	ATCGTCTTCGCATCGGTGTGGTTT	6	-	64	684
ENSDARG00000018491	ENSDART00000081851	24	1	1	ATCGTCTTCGCATCGGTGTGGTT	5	-	65	684
ENSDARG00000018491	ENSDART00000081851	24	1	1	GTCTTCGCATCGGTGTGGTTTAA	5	-	62	684
ENSDARG00000018491	ENSDART00000081851	24	2	2	CTCTTCTCCCAGATCTTCTGCTGAA	7	-	99	684
ENSDARG00000018491	ENSDART00000081851	24	4	4	GCCACCTTCAAATTTGATGGGGTT	6	-	595	684
ENSDARG00000018491	ENSDART00000081851	24	4	4	GACCGCACCACGGGGCATAGAAC	5	-	405	684
ENSDARG00000018491	ENSDART00000081851	24	4	4	ACCTTCACCGGTCCTTTGTTGTT	5	-	322	684
ENSDARG00000018491	ENSDART00000081851	24	4	4	ACCTTCAAATTTGATGGGGTTCT	5	-	593	684
ENSDARG00000019125	ENSDART00000010488	24	1	1	GCAAACAGCGAGAGATTGTTTTGGA	7	+	143	1782
ENSDARG00000019125	ENSDART00000010488	24	1	1	GACTGCATCAGGCTACGTCTGGTTC	7	+	595	1782
ENSDARG00000019125	ENSDART00000010488	24	1	1	AACTGCTTAGCCATTTTTAGATTAG	7	+	337	1782
ENSDARG00000019125	ENSDART00000010488	24	1	1	TCCTGCAAAAGCGCCTGAGTTTGAG	7	+	311	1782
ENSDARG00000019125	ENSDART00000010488	24	1	1	TTCTTCAAATCAGGTGTGGAGGA	5	+	118	1782
ENSDARG00000019125	ENSDART00000010488	24	1	1	AAAACCAGATATTTGTGGCAGGT	5	+	998	1782
ENSDARG00000019125	ENSDART00000010488	24	1	1	TTCTTCAAATCAGGTGTGGAGGAG	6	+	118	1782
ENSDARG00000019125	ENSDART00000010488	24	1	1	TGCAAAAGCGCCTGAGTTTGAGCA	6	+	314	1782
ENSDARG00000019125	ENSDART00000010488	24	2	2	TGCATCGTCTGACTGGATGGGAA	5	+	1086	1782
ENSDARG00000019125	ENSDART00000010488	24	2	2	GAAAACTTCATCTTTGTAATTGGAG	7	+	1156	1782
ENSDARG00000019125	ENSDART00000010488	24	4	4	AACATCTACGTGGTGGCTGGTGTT	6	+	1456	1782
ENSDARG00000019125	ENSDART00000010488	24	4	4	AACATCTACGTGGTGGCTGGTGT	5	+	1456	1782
ENSDARG00000019125	ENSDART00000010488	24	4	4	AACAACATCTACGTGGTGGCTGGT	6	+	1453	1782
ENSDARG00000019125	ENSDART00000010488	24	4	4	AAAAACAACATCTACGTGGTGGCT	6	+	1450	1782
ENSDARG00000019137	ENSDART00000004664	24	2	2	TACATCAAAGGTAGCGGTTTTGTTC	7	+	135	1128
ENSDARG00000019137	ENSDART00000004664	24	2	2	TACATCAAAGGTAGCGGTTTTGTT	6	+	135	1128
ENSDARG00000019137	ENSDART00000004664	24	4	4	CTCTTCTCCTGCCTGTGGGGAGCC	6	+	397	1128
ENSDARG00000019137	ENSDART00000004664	24	4	4	TACCTCTTCTCCTGCCTGTGGGGAG	7	+	394	1128
ENSDARG00000019137	ENSDART00000004664	24	9	9	GGCTTCGGCCTTGCAGGAGCAGAG	6	+	826	1128
ENSDARG00000019137	ENSDART00000004664	24	10	10	CACTCAAGCTTTTATGATGTGGAA	6	+	927	1128
ENSDARG00000019137	ENSDART00000004664	24	10	10	ATCAACTTCCAGTTGCGACGATGGA	7	+	955	1128
ENSDARG00000019137	ENSDART00000004664	24	12	12	TCCCCCAGAGCGAGGAAGGAGAA	5	+	1108	1128
ENSDARG00000019137	ENSDART00000004664	24	12	12	AGATTCCCCCAGAGCGAGGAAGGA	6	+	1104	1128
ENSDARG00000019137	ENSDART00000105973	24	2	2	TACATCAAAGGTAGCGGTTTTGTTC	7	+	135	1107
ENSDARG00000019137	ENSDART00000105973	24	2	2	TACATCAAAGGTAGCGGTTTTGTT	6	+	135	1107
ENSDARG00000019137	ENSDART00000105973	24	4	4	TACCTCTTCTCCTGCCTGTGGGGAG	7	+	394	1107
ENSDARG00000019137	ENSDART00000105973	24	4	4	CTCTTCTCCTGCCTGTGGGGAGCC	6	+	397	1107
ENSDARG00000019137	ENSDART00000105973	24	9	9	GGCTTCGGCCTTGCAGGAGCAGAG	6	+	826	1107
ENSDARG00000019137	ENSDART00000105973	24	10	10	ATCAACTTCCAGTTGCGACGATGGA	7	+	955	1107
ENSDARG00000019137	ENSDART00000105973	24	10	10	CACTCAAGCTTTTATGATGTGGAA	6	+	927	1107
ENSDARG00000019137	ENSDART00000105973	24	11	11	TCCCCCAGAGCGAGGAAGGAGAA	5	+	1087	1107
ENSDARG00000019137	ENSDART00000105973	24	11	11	AGATTCCCCCAGAGCGAGGAAGGA	6	+	1083	1107
ENSDARG00000019332	ENSDART00000080510	24	1	1	ACAATCAGCTCTTTGCGGTAGGG	5	-	175	390
ENSDARG00000019342	ENSDART00000015391	24	4	4	TGCGACTGCCACCAAGTATGGTGT	6	+	308	1557
ENSDARG00000019342	ENSDART00000015391	24	4	4	GACTGCCACCAAGTATGGTGTGGTT	7	+	311	1557
ENSDARG00000019342	ENSDART00000015391	24	6	6	CAACGCTAAAGAGATTAGCTTAA	5	+	528	1557
ENSDARG00000019342	ENSDART00000015391	24	7	7	TTCTGCAGAAAATGGTGAGTGGGAA	7	+	621	1557
ENSDARG00000019342	ENSDART00000015391	24	10	10	AAATCCCGCAGCGAGCTGATGTT	5	+	1192	1557
ENSDARG00000019342	ENSDART00000015391	24	12	12	CCCTTCTCCTATACTGAAGAAAAC	6	+	1531	1557
ENSDARG00000019342	ENSDART00000015391	24	12	12	ACAATCAGCCACCAGCGTTGCCTTT	7	+	1496	1557
ENSDARG00000019342	ENSDART00000015391	24	12	12	CAATCAGCCACCAGCGTTGCCTTT	6	+	1497	1557
ENSDARG00000019371	ENSDART00000025621	24	2	2	ACCTGCAGCTTAGCTGAAGTGTCT	6	-	143	3816
ENSDARG00000019371	ENSDART00000025621	24	2	2	CTCACCTGCAGCTTAGCTGAAGTG	6	-	146	3816
ENSDARG00000019371	ENSDART00000025621	24	4	4	TTAACCAACGAGACTTTGGCGTC	5	-	478	3816
ENSDARG00000019371	ENSDART00000025621	24	4	4	TGCACCTTCACAAAAGGCCGCTGGC	7	-	380	3816
ENSDARG00000019371	ENSDART00000025621	24	5	5	GTTAAAAACTTGTTTGTGTATTT	5	-	631	3816
ENSDARG00000019371	ENSDART00000025621	24	7	7	TTCGGCTTCTTGATATGCGTTTGC	6	-	824	3816
ENSDARG00000019371	ENSDART00000025621	24	7	7	TTCGGCTTCTTGATATGCGTTTGCT	7	-	823	3816
ENSDARG00000019371	ENSDART00000025621	24	8	8	TGCAAAAGCCTGAACGACGGGGCC	6	-	1006	3816
ENSDARG00000019371	ENSDART00000025621	24	8	8	GCAAAAGCCTGAACGACGGGGCC	5	-	1006	3816
ENSDARG00000019371	ENSDART00000025621	24	10	10	TGCCACAGCCATTGGATTTGAGGTG	7	-	1364	3816
ENSDARG00000019371	ENSDART00000025621	24	13	13	AGCTTCATCCCAAACTGTGATTTG	6	-	1762	3816
ENSDARG00000019371	ENSDART00000025621	24	13	13	TTCTTCAGCCCAAAGTGCAGAGTGT	7	-	1826	3816
ENSDARG00000019371	ENSDART00000025621	24	14	14	TTCCAAGCAGCACCGGCGCCTGC	5	-	1950	3816
ENSDARG00000019371	ENSDART00000025621	24	14	14	GCACTCCCCGAGCAGGGCAGTGGAG	7	-	2014	3816
ENSDARG00000019371	ENSDART00000025621	24	14	14	GTCTCACCAGACACCTGCTGGAGCT	7	-	2075	3816
ENSDARG00000019371	ENSDART00000025621	24	14	14	CTCACCAGACACCTGCTGGAGCT	5	-	2075	3816
ENSDARG00000019371	ENSDART00000025621	24	15	15	GACCCCCTCTGATTGGTGGCTTG	5	-	2170	3816
ENSDARG00000019371	ENSDART00000025621	24	16	16	CACAACACACGTACATGCTAGGGT	6	-	2257	3816
ENSDARG00000019371	ENSDART00000025621	24	18	18	TGCCAATGCCAACAGCTGAGGCC	5	-	2508	3816
ENSDARG00000019371	ENSDART00000025621	24	18	18	CACAGCTACTGTGGTGCAGCTGGC	6	-	2536	3816
ENSDARG00000019371	ENSDART00000025621	24	18	18	CTCCGCGCCCCAGGGGCTTTTCT	5	-	2466	3816
ENSDARG00000019371	ENSDART00000025621	24	22	22	GAAATCAAATCTTCAAGAAGAAGAG	7	-	2930	3816
ENSDARG00000019371	ENSDART00000025621	24	22	22	CAAATCTTCAAGAAGAAGAGGGT	5	-	2927	3816
ENSDARG00000019371	ENSDART00000025621	24	24	24	ATCCACTTCAGCGGTAAGCGTGC	5	-	3127	3816
ENSDARG00000019371	ENSDART00000025621	24	25	25	GAACTCCTCATCCATGTTGAGTC	5	-	3257	3816
ENSDARG00000019371	ENSDART00000025621	24	30	30	TGCTCAGACGAGGCTGACTTTGAC	6	-	3728	3816
ENSDARG00000019976	ENSDART00000027009	24	5	4	TTCCCACCATTTGAAGAGGAAGGT	6	-	616	681
ENSDARG00000019976	ENSDART00000027009	24	5	4	GTTTTCCCACCATTTGAAGAGGAA	6	-	619	681
ENSDARG00000019976	ENSDART00000027009	24	5	4	GCCCCAAACGCCATCTGACTGGGCT	7	-	420	681
ENSDARG00000019976	ENSDART00000027009	24	5	4	CCCAAACGCCATCTGACTGGGCT	5	-	420	681
ENSDARG00000020080	ENSDART00000024706	24	1	1	TTCGCCAGAGCACTTTCTGCAGTG	6	-	121	2019
ENSDARG00000020080	ENSDART00000024706	24	1	1	GTTGACAGACACCAGCTGACGTG	5	-	311	2019
ENSDARG00000020080	ENSDART00000024706	24	1	1	GTCCACCACTGTCTCGGGGAGGAC	6	-	74	2019
ENSDARG00000020080	ENSDART00000024706	24	1	1	GACACCAGCTGACGTGGACTGGGGC	7	-	302	2019
ENSDARG00000020080	ENSDART00000024706	24	4	4	TCCACCGTCATGCTGTTGGATTT	5	-	526	2019
ENSDARG00000020080	ENSDART00000024706	24	4	4	CCCGTCCACCGTCATGCTGTTGGA	6	-	529	2019
ENSDARG00000020080	ENSDART00000024706	24	5	5	ACCGTCCACTAACAATGAAGCAGGC	7	-	754	2019
ENSDARG00000020080	ENSDART00000024706	24	6	6	CTCCTCCTCAGGGTCTTGCTTTGCT	7	-	795	2019
ENSDARG00000020080	ENSDART00000024706	24	8	8	AACTCCTTCCAGTCGAATGATGT	5	-	1124	2019
ENSDARG00000020080	ENSDART00000024706	24	11	11	GTAAACTTCCTGTAGGTGATGGC	5	-	1465	2019
ENSDARG00000020080	ENSDART00000024706	24	12	12	TTCCCAGCAGTCAAGCATGAGCT	5	-	1646	2019
ENSDARG00000020080	ENSDART00000024706	24	12	12	AGCTGCTTCAGGCTGCTGGGATTTC	7	-	1730	2019
ENSDARG00000020080	ENSDART00000024706	24	12	12	CAATCCATCGGGGCCGGAAGCCTGT	7	-	1604	2019
ENSDARG00000020080	ENSDART00000024706	24	12	12	GCCAGCTGCTTCAGGCTGCTGGGAT	7	-	1733	2019
ENSDARG00000020080	ENSDART00000024706	24	12	12	GCCAGCTGCTTCAGGCTGCTGGG	5	-	1735	2019
ENSDARG00000020080	ENSDART00000024706	24	15	15	GTAGCCGGCGCTGGAGAAGTGTTC	6	-	1870	2019
ENSDARG00000020080	ENSDART00000079901	24	1	1	CCCAACCCAGATCACCTGGGGCGGA	7	-	31	2871
ENSDARG00000020080	ENSDART00000079901	24	1	1	TACTCACCCCCTCTGATGGATAC	5	-	60	2871
ENSDARG00000020080	ENSDART00000079901	24	2	2	GCCTGCAAACACAGCGGCCGATGGG	7	-	688	2871
ENSDARG00000020080	ENSDART00000079901	24	2	2	CCCAACGTCTGTCTGTGTGAAGCT	6	-	382	2871
ENSDARG00000020080	ENSDART00000079901	24	2	2	TGCGGCAACTGCATTGTTGGATTC	6	-	298	2871
ENSDARG00000020080	ENSDART00000079901	24	3	3	GTACGCATCCATAGCTGAGGCCTTG	7	-	765	2871
ENSDARG00000020080	ENSDART00000079901	24	4	4	GTCCACCACTGTCTCGGGGAGGAC	6	-	968	2871
ENSDARG00000020080	ENSDART00000079901	24	4	4	GACACCAGCTGACGTGGACTGGGGC	7	-	1196	2871
ENSDARG00000020080	ENSDART00000079901	24	4	4	GTTGACAGACACCAGCTGACGTG	5	-	1205	2871
ENSDARG00000020080	ENSDART00000079901	24	4	4	TTCGCCAGAGCACTTTCTGCAGTG	6	-	1015	2871
ENSDARG00000020080	ENSDART00000079901	24	7	7	TCCACCGTCATGCTGTTGGATTT	5	-	1411	2871
ENSDARG00000020080	ENSDART00000079901	24	7	7	CCCGTCCACCGTCATGCTGTTGGA	6	-	1414	2871
[truncated: 6,834 more rows]
