# Supplementary material for: Rapid Mutation of Endogenous Zebrafish Genes Using Zinc Finger Nucleases Made by Oligomerized Pool ENgineering (OPEN)
Source: PLoS One. 2009 Feb 9;4(2):e4348. doi: 10.1371/journal.pone.0004348 (PMC2634973; doi:10.1371/journal.pone.0004348)
Supplement: Table S25 — Potential OPEN ZFN target sites in gene transcripts encoded on zebrafish chromosome 25. Data presented as described in the legend to Table S1. (1.58 MB XLS) [file pone.0004348.s025.xls]

## Sheet: Chromosome25
Gene ID	Transcript ID	Chromosome Number	Exon Number	Coding Exon Number	TargetSite	ZFN Spacer Length	Strand	ZFN Cleavage Site	Coding Sequence Length
ENSDARG00000001127	ENSDART00000003494	25	2	2	GGCCCATGCACATGCCGGAGAAGAA	7	+	152	1761
ENSDARG00000001127	ENSDART00000003494	25	2	2	GGCGGCCCATGCACATGCCGGAGAA	7	+	149	1761
ENSDARG00000001127	ENSDART00000003494	25	4	4	TTCATCCCCTCTGCTGCGCGTGT	5	+	514	1761
ENSDARG00000001127	ENSDART00000003494	25	5	5	TACCCAGCATGCCATGGGATTTGGA	7	+	595	1761
ENSDARG00000001127	ENSDART00000003494	25	5	5	TACCCAGCATGCCATGGGATTTG	5	+	595	1761
ENSDARG00000001127	ENSDART00000003494	25	5	5	CTCCACCACTTGAGAGAAGTCGTT	6	+	629	1761
ENSDARG00000001127	ENSDART00000003494	25	5	5	AGCAACCACCTCTTTTTGTGGTA	5	+	654	1761
ENSDARG00000001127	ENSDART00000003494	25	6	6	GTCTTCTACATTTATGGTAGGTG	5	+	745	1761
ENSDARG00000001127	ENSDART00000003494	25	6	6	GTTTCAGGCTCATACGCTGGCGCT	6	+	667	1761
ENSDARG00000001127	ENSDART00000003494	25	6	6	GGCTCATACGCTGGCGCTGTGGTG	6	+	673	1761
ENSDARG00000001127	ENSDART00000003494	25	7	7	ATCCCACCATAACAGATGAAGAG	5	+	824	1761
ENSDARG00000001127	ENSDART00000003494	25	10	10	GTCGCCATCTCTTTTCTGGTGCT	5	+	1243	1761
ENSDARG00000001127	ENSDART00000003494	25	11	11	GTCGGCACACTTTCTGGTATGGTCT	7	+	1366	1761
ENSDARG00000001127	ENSDART00000003494	25	12	12	TGCGGCTTCATCGATGAAGACGAG	6	+	1558	1761
ENSDARG00000001127	ENSDART00000003494	25	12	12	GTTCACTACGGCGGTGTGATTTT	5	+	1468	1761
ENSDARG00000001127	ENSDART00000003494	25	12	12	ACCAGCGACGAGAAGTGCGGCTTC	6	+	1543	1761
ENSDARG00000001127	ENSDART00000003494	25	12	12	CAACGCAGCTGAACGGAGGCTGGG	6	+	1673	1761
ENSDARG00000001259	ENSDART00000034313	25	1	1	CTCTCCAGCATGCTGGGTAGGTC	5	+	142	852
ENSDARG00000001259	ENSDART00000034313	25	3	3	CACCGCTAACTTTCTGTCGTGGTG	6	+	351	852
ENSDARG00000001259	ENSDART00000034313	25	3	3	CAACACCGCTAACTTTCTGTCGTG	6	+	348	852
ENSDARG00000001259	ENSDART00000034313	25	4	4	AACAGCAAAGAGAGGTTTGTCTGT	6	+	434	852
ENSDARG00000001259	ENSDART00000034313	25	4	4	ACAAACAGCAAAGAGAGGTTTGTCT	7	+	431	852
ENSDARG00000001259	ENSDART00000034313	25	4	4	ACAAACAGCAAAGAGAGGTTTGT	5	+	431	852
ENSDARG00000001259	ENSDART00000034313	25	6	6	AGAAAATGCTTTTCATTAGAGTAA	6	+	818	852
ENSDARG00000001879	ENSDART00000032783	25	2	2	AAAGACCTCCAGCAGGATGTTGCG	6	+	85	201
ENSDARG00000001879	ENSDART00000032783	25	2	2	ACCTCCAGCAGGATGTTGCGGAT	5	+	89	201
ENSDARG00000001879	ENSDART00000038039	25	1	1	TCCACCCGCGAAACCAGCGGCCTGT	7	+	287	1131
ENSDARG00000001879	ENSDART00000038039	25	1	1	TGCCAAACCAGCTATTAGTGGAA	5	+	573	1131
ENSDARG00000001879	ENSDART00000038039	25	1	1	TTCGCCCCCTTGTGGTGTGGAGGG	6	+	648	1131
ENSDARG00000001879	ENSDART00000038039	25	1	1	TTCGCCCCCTTGTGGTGTGGAGGGA	7	+	648	1131
ENSDARG00000001879	ENSDART00000038039	25	1	1	TACCAAAACCGATGGACTTGTAC	5	+	501	1131
ENSDARG00000001879	ENSDART00000038039	25	1	1	GCCAAACCAGCTATTAGTGGAATTC	7	+	574	1131
ENSDARG00000001879	ENSDART00000038039	25	1	1	CAACTCTAAATAAGGCTGTAGCT	5	+	626	1131
ENSDARG00000001879	ENSDART00000038039	25	1	1	CAAACCAGCTATTAGTGGAATTC	5	+	576	1131
ENSDARG00000001879	ENSDART00000038039	25	1	1	AGCTTCGCCCCCTTGTGGTGTGGAG	7	+	645	1131
ENSDARG00000001879	ENSDART00000038039	25	4	4	CACATCTTCTGAACTGTTTGCTGAC	7	+	963	1131
ENSDARG00000001879	ENSDART00000073629	25	1	1	ACCTCCAGCAGGATGTTGCGGAT	5	+	71	1554
ENSDARG00000001879	ENSDART00000073629	25	1	1	AAAGACCTCCAGCAGGATGTTGCG	6	+	67	1554
ENSDARG00000001879	ENSDART00000073629	25	4	4	CGCTTCAGACAGCAGACTTTGAA	5	+	307	1554
ENSDARG00000001879	ENSDART00000073629	25	5	5	ACCGGCAGCACCAACAGACGGAGTC	7	+	541	1554
ENSDARG00000001879	ENSDART00000073629	25	5	5	GTTAAAGCCGCCAGTCTCTGCCTAC	7	+	588	1554
ENSDARG00000001879	ENSDART00000073629	25	6	6	TTCGCCCCCTTGTGGTGTGGAGGG	6	+	1305	1554
ENSDARG00000001879	ENSDART00000073629	25	6	6	TGCCAAACCAGCTATTAGTGGAA	5	+	1230	1554
ENSDARG00000001879	ENSDART00000073629	25	6	6	TCCACCCGCGAAACCAGCGGCCTGT	7	+	944	1554
ENSDARG00000001879	ENSDART00000073629	25	6	6	TTCGCCCCCTTGTGGTGTGGAGGGA	7	+	1305	1554
ENSDARG00000001879	ENSDART00000073629	25	6	6	TACCAAAACCGATGGACTTGTAC	5	+	1158	1554
ENSDARG00000001879	ENSDART00000073629	25	6	6	GCCAAACCAGCTATTAGTGGAATTC	7	+	1231	1554
ENSDARG00000001879	ENSDART00000073629	25	6	6	CAACTCTAAATAAGGCTGTAGCT	5	+	1283	1554
ENSDARG00000001879	ENSDART00000073629	25	6	6	CAAACCAGCTATTAGTGGAATTC	5	+	1233	1554
ENSDARG00000001879	ENSDART00000073629	25	6	6	AGCTTCGCCCCCTTGTGGTGTGGAG	7	+	1302	1554
ENSDARG00000001879	ENSDART00000103960	25	2	2	GCCTCCAGCTCTCAGAGAAGGTGGA	7	+	302	519
ENSDARG00000001879	ENSDART00000103960	25	2	2	GCCCTCGCCTACAAGCTGGTGAA	5	+	218	519
ENSDARG00000001879	ENSDART00000103960	25	2	2	CTCGCCTACAAGCTGGTGAAGCC	5	+	221	519
ENSDARG00000001879	ENSDART00000103960	25	2	2	AGCTCCTGCCCCTGGAGACTGGGTT	7	+	187	519
ENSDARG00000001879	ENSDART00000103960	25	3	3	TGCAGCTACTTGACGGACGGAGGT	6	+	400	519
ENSDARG00000002347	ENSDART00000024866	25	5	3	ACAAACAGATTGAGAGGAGTGGGCA	7	+	536	1533
ENSDARG00000002347	ENSDART00000024866	25	5	3	ACAAACAGATTGAGAGGAGTGGGC	6	+	536	1533
ENSDARG00000002347	ENSDART00000024866	25	7	5	AAATCCAGAAGGCAATGGGAAGTA	6	+	858	1533
ENSDARG00000002347	ENSDART00000024866	25	10	8	GTCCCCGCCAGTGTCTGGGTCGCA	6	+	1361	1533
ENSDARG00000002988	ENSDART00000048642	25	4	4	CACCAAAAATCCCTGAGGGGGATAA	7	+	107	729
ENSDARG00000002988	ENSDART00000048642	25	4	4	CACCAAAAATCCCTGAGGGGGAT	5	+	107	729
ENSDARG00000002988	ENSDART00000048642	25	4	4	AGCACCAAAAATCCCTGAGGGGGAT	7	+	105	729
ENSDARG00000002988	ENSDART00000048642	25	5	5	AGAGACAGAAAGATGAAGAGGAA	5	+	215	729
ENSDARG00000002988	ENSDART00000048642	25	5	5	AAAAGCGTCAGGAAAAGGATTTAAC	7	+	155	729
ENSDARG00000002988	ENSDART00000048642	25	11	11	CGCGGCAAAGGCAAGATGGGAGGAA	7	+	706	729
ENSDARG00000002988	ENSDART00000048642	25	11	11	GGCAAAGGCAAGATGGGAGGAAGAC	7	+	709	729
ENSDARG00000002988	ENSDART00000104296	25	5	5	CACCAAAAATCCCTGAGGGGGATAA	7	+	125	699
ENSDARG00000002988	ENSDART00000104296	25	5	5	CACCAAAAATCCCTGAGGGGGAT	5	+	125	699
ENSDARG00000002988	ENSDART00000104296	25	5	5	AGCACCAAAAATCCCTGAGGGGGAT	7	+	123	699
ENSDARG00000002988	ENSDART00000104296	25	6	6	AGAGACAGAAAGATGAAGAGGAA	5	+	233	699
ENSDARG00000002988	ENSDART00000104296	25	6	6	AAAAGCGTCAGGAAAAGGATTTAAC	7	+	173	699
ENSDARG00000002988	ENSDART00000104297	25	3	3	AGCACCAAAAATCCCTGAGGGGGAT	7	+	93	717
ENSDARG00000002988	ENSDART00000104297	25	3	3	CACCAAAAATCCCTGAGGGGGAT	5	+	95	717
ENSDARG00000002988	ENSDART00000104297	25	3	3	CACCAAAAATCCCTGAGGGGGATAA	7	+	95	717
ENSDARG00000002988	ENSDART00000104297	25	4	4	AAAAGCGTCAGGAAAAGGATTTAAC	7	+	143	717
ENSDARG00000002988	ENSDART00000104297	25	4	4	AGAGACAGAAAGATGAAGAGGAA	5	+	203	717
ENSDARG00000002988	ENSDART00000104297	25	10	10	GGCAAAGGCAAGATGGGAGGAAGAC	7	+	697	717
ENSDARG00000002988	ENSDART00000104297	25	10	10	CGCGGCAAAGGCAAGATGGGAGGAA	7	+	694	717
ENSDARG00000003084	ENSDART00000012287	25	2	1	GCCTGCTCCTCATTGATGGGCTGCT	7	-	101	1815
ENSDARG00000003084	ENSDART00000012287	25	4	3	GTAGCCCTCGTCTTTAGCTGCGTTG	7	-	462	1815
ENSDARG00000003084	ENSDART00000012287	25	4	3	ACCCCAGTCCAGAGCGCGGTAGAT	6	-	337	1815
ENSDARG00000003084	ENSDART00000012287	25	4	3	GCCCTCGTCTTTAGCTGCGTTGCT	6	-	460	1815
ENSDARG00000003084	ENSDART00000012287	25	4	3	CTCCTCACCTCTTTGGCGTCTCT	5	-	682	1815
ENSDARG00000003084	ENSDART00000012287	25	5	4	TACCCAGTCAGTGTGTTGAAGAG	5	-	755	1815
ENSDARG00000003084	ENSDART00000012287	25	6	5	TTCAGCTTCACCCCCTGCCGCAGCT	7	-	803	1815
ENSDARG00000003084	ENSDART00000012287	25	8	7	TGCGGCCGCTGGGGTGGAGGAGGA	6	-	1044	1815
ENSDARG00000003084	ENSDART00000012287	25	8	7	TGCGGCCGCTGGGGTGGAGGAGGAA	7	-	1043	1815
ENSDARG00000003084	ENSDART00000012287	25	8	7	GACTGCGGCCGCTGGGGTGGAGGA	6	-	1047	1815
ENSDARG00000003084	ENSDART00000012287	25	8	7	GACTGCGGCCGCTGGGGTGGAGGAG	7	-	1046	1815
ENSDARG00000003084	ENSDART00000012287	25	8	7	AGAGACTGCGGCCGCTGGGGTGGAG	7	-	1049	1815
ENSDARG00000003084	ENSDART00000012287	25	8	7	AGAGACTGCGGCCGCTGGGGTGGA	6	-	1050	1815
ENSDARG00000003084	ENSDART00000012287	25	10	9	TGCCACACCGCTGTGCTGAGGAG	5	-	1439	1815
ENSDARG00000003084	ENSDART00000012287	25	10	9	CGCTGCCACACCGCTGTGCTGAGGA	7	-	1440	1815
ENSDARG00000003084	ENSDART00000012287	25	10	9	CGCTGCCACACCGCTGTGCTGAG	5	-	1442	1815
ENSDARG00000003084	ENSDART00000012287	25	11	10	ACCATCCACTGGTGTCTGGAGAG	5	-	1618	1815
ENSDARG00000003084	ENSDART00000012287	25	12	11	CTAAAAAGCTCTTTGTTCTGCATGT	7	-	1733	1815
ENSDARG00000003191	ENSDART00000024013	25	1	1	GTCAACCCAGTCCTGGCGGAAGAA	6	+	82	1815
ENSDARG00000003191	ENSDART00000024013	25	2	2	GACAAAGACTACGGCCTCTGGCTTC	7	+	243	1815
ENSDARG00000003191	ENSDART00000024013	25	3	3	ACCTGCTTCACGTTCTTTGGAGAC	6	+	387	1815
ENSDARG00000003191	ENSDART00000024013	25	5	5	AACATCACAAAGGTGGTGCAGCA	5	+	718	1815
ENSDARG00000003191	ENSDART00000024013	25	6	6	TTATCCGCAAAGCTGCTGATGTG	5	+	962	1815
ENSDARG00000003191	ENSDART00000024013	25	8	8	GGCCAATGCTGTGCTCGACGGTGCC	7	+	1275	1815
ENSDARG00000003191	ENSDART00000024013	25	11	11	ACACCATGCGCATCGTTGTGGTGCC	7	+	1799	1815
ENSDARG00000003191	ENSDART00000024013	25	11	11	ATCATCGTCGTCACAGGCTGGCGTC	7	+	1756	1815
ENSDARG00000003191	ENSDART00000024013	25	11	11	ACACCATGCGCATCGTTGTGGTG	5	+	1799	1815
ENSDARG00000003216	ENSDART00000011967	25	2	1	TTACTCCGCCCAGTTCGAGGGTGAG	7	-	40	1011
ENSDARG00000003216	ENSDART00000011967	25	2	1	TACTCCGCCCAGTTCGAGGGTGAG	6	-	40	1011
ENSDARG00000003216	ENSDART00000011967	25	2	1	CTCCGCCCAGTTCGAGGGTGAGCT	6	-	38	1011
ENSDARG00000003216	ENSDART00000011967	25	4	3	ATCTCCCGCCGCTGGTTGTATGT	5	-	193	1011
ENSDARG00000003216	ENSDART00000011967	25	7	6	ACCTCAACAAGAGCAAGCAGGAGTT	7	-	509	1011
ENSDARG00000003216	ENSDART00000011967	25	11	10	TTATTCTACCTTCATGGCGTCTTG	6	-	826	1011
ENSDARG00000003546	ENSDART00000048083	25	1	1	GCCTCAAACATCACCTGGAGCAGAT	7	-	95	2145
ENSDARG00000003546	ENSDART00000048083	25	2	2	GCAGGCAGCATGTCAAGCAGATGAC	7	-	206	2145
ENSDARG00000003546	ENSDART00000048083	25	2	2	GCACCAGACACACTGGATGCAGGC	6	-	225	2145
ENSDARG00000003546	ENSDART00000048083	25	2	2	CGCACCAGACACACTGGATGCAGGC	7	-	225	2145
ENSDARG00000003546	ENSDART00000048083	25	3	3	TTCCTCACAGAGCTTGCTGAAGTT	6	-	487	2145
ENSDARG00000003546	ENSDART00000048083	25	4	4	GCCACCTGCTGCTGGACGATGTC	5	-	667	2145
ENSDARG00000003546	ENSDART00000048083	25	4	4	ACCTGCTGCTGGACGATGTCTTC	5	-	664	2145
ENSDARG00000003546	ENSDART00000048083	25	4	4	CTCCACTGCCACCTGCTGCTGGA	5	-	674	2145
ENSDARG00000003546	ENSDART00000048083	25	7	7	GACATCGGCGTCCAGCGTGAGGT	5	-	977	2145
ENSDARG00000003546	ENSDART00000048083	25	7	7	CCCAGCGCCGCGATGCTGGAGGA	5	-	936	2145
ENSDARG00000003546	ENSDART00000048083	25	8	8	CTCTACATCGTAGCTGTTGGTGCA	6	-	1105	2145
ENSDARG00000003546	ENSDART00000048083	25	8	8	TCCACCATCTGCGGGTCTGGCTTC	6	-	1128	2145
ENSDARG00000003546	ENSDART00000048083	25	9	9	CGCTGCTCCACAAATGGTTGGCC	5	-	1201	2145
ENSDARG00000003546	ENSDART00000048083	25	12	12	TTCTGCAGCATTGAGCAGTCGAG	5	-	1546	2145
ENSDARG00000003546	ENSDART00000048083	25	12	12	AGCCTCAAAGTTCTGCAGCATTG	5	-	1556	2145
ENSDARG00000003546	ENSDART00000048083	25	14	14	GTCAGCACAGCCAGTGTGCCGGA	5	-	1834	2145
ENSDARG00000003546	ENSDART00000048083	25	14	14	ATCATCCTCACCACTGTAGAGAAC	6	-	1789	2145
ENSDARG00000003546	ENSDART00000048083	25	15	15	GACCACTCCACGGTGCCGCAGGT	5	-	1949	2145
ENSDARG00000003546	ENSDART00000048083	25	15	15	ATCAGCTTCTCTGCTAAGCTTTT	5	-	1999	2145
ENSDARG00000003546	ENSDART00000103033	25	1	1	GCCTCAAACATCACCTGGAGCAGAT	7	-	98	2154
ENSDARG00000003546	ENSDART00000103033	25	2	2	CGCACCAGACACACTGGATGCAGGC	7	-	228	2154
ENSDARG00000003546	ENSDART00000103033	25	2	2	GCAGGCAGCATGTCAAGCAGATGAC	7	-	209	2154
ENSDARG00000003546	ENSDART00000103033	25	2	2	GCACCAGACACACTGGATGCAGGC	6	-	228	2154
ENSDARG00000003546	ENSDART00000103033	25	3	3	TTCCTCACAGAGCTTGCTGAAGTT	6	-	490	2154
ENSDARG00000003546	ENSDART00000103033	25	4	4	GCCACCTGCTGCTGGACGATGTC	5	-	670	2154
ENSDARG00000003546	ENSDART00000103033	25	4	4	ACCTGCTGCTGGACGATGTCTTC	5	-	667	2154
ENSDARG00000003546	ENSDART00000103033	25	4	4	CTCCACTGCCACCTGCTGCTGGA	5	-	677	2154
ENSDARG00000003546	ENSDART00000103033	25	6	6	CCCAGCGCCGCGATGCTGGAGGA	5	-	939	2154
ENSDARG00000003546	ENSDART00000103033	25	6	6	GACATCGGCGTCCAGCGTGAGGT	5	-	980	2154
ENSDARG00000003546	ENSDART00000103033	25	7	7	CTCTACATCGTAGCTGTTGGTGCA	6	-	1108	2154
ENSDARG00000003546	ENSDART00000103033	25	7	7	TCCACCATCTGCGGGTCTGGCTTC	6	-	1131	2154
ENSDARG00000003546	ENSDART00000103033	25	8	8	CGCTGCTCCACAAATGGTTGGCC	5	-	1204	2154
ENSDARG00000003546	ENSDART00000103033	25	11	11	TTCTGCAGCATTGAGCAGTCGAG	5	-	1549	2154
ENSDARG00000003546	ENSDART00000103033	25	11	11	AGCCTCAAAGTTCTGCAGCATTG	5	-	1559	2154
ENSDARG00000003546	ENSDART00000103033	25	13	13	GTCAGCACAGCCAGTGTGCCGGA	5	-	1837	2154
ENSDARG00000003546	ENSDART00000103033	25	13	13	ATCATCCTCACCACTGTAGAGAAC	6	-	1792	2154
ENSDARG00000003546	ENSDART00000103033	25	14	14	GACCACTCCACGGTGCCGCAGGT	5	-	1952	2154
ENSDARG00000003546	ENSDART00000103033	25	14	14	ATCAGCTTCTCTGCTAAGCTTTT	5	-	2002	2154
ENSDARG00000003582	ENSDART00000018190	25	2	1	TCCAGCGTCCTGCAGCGCAGTAGGA	7	+	70	1041
ENSDARG00000003582	ENSDART00000018190	25	3	2	GAAAGCAGCAGAAAGCTGTGGAGGT	7	+	359	1041
ENSDARG00000003582	ENSDART00000018190	25	3	2	GAAAGCAGCAGAAAGCTGTGGAG	5	+	359	1041
ENSDARG00000003582	ENSDART00000018190	25	3	2	AGCAGCAGAAAGCTGTGGAGGTA	5	+	362	1041
ENSDARG00000003582	ENSDART00000018190	25	6	5	GTCTTCAGCATGCTCAGCCGGTGAG	7	+	759	1041
ENSDARG00000003582	ENSDART00000018190	25	8	7	AACCCATTCATGTCCCGAAGCAGGA	7	+	832	1041
ENSDARG00000003582	ENSDART00000018190	25	8	7	TTATCAAGCAGAAATTGATGTTTTT	7	+	1019	1041
ENSDARG00000003841	ENSDART00000007029	25	4	4	GGCCTATAAACTGAAGGTGTATTC	6	+	516	846
ENSDARG00000003841	ENSDART00000007029	25	5	5	GTTGACGCAGGACTTTTCTTGGGAT	7	+	554	846
ENSDARG00000003841	ENSDART00000007029	25	6	6	GAAAAAGGCATGTTTATTAGAATTG	7	+	726	846
ENSDARG00000003971	ENSDART00000012862	25	1	1	CACCCAAGAAAGAAGGATGCGGTA	6	-	23	1083
ENSDARG00000003971	ENSDART00000012862	25	3	3	AAACACTCCATGTGGTAGACGTT	5	-	331	1083
ENSDARG00000003971	ENSDART00000012862	25	3	3	CTAAAACACTCCATGTGGTAGAC	5	-	334	1083
ENSDARG00000003971	ENSDART00000012862	25	4	4	GACTTCTTCTTGTCTTTGCAGCG	5	-	742	1083
ENSDARG00000003971	ENSDART00000012862	25	6	6	GCACCATGCTGTTGGGGGTGTCGGG	7	-	1051	1083
ENSDARG00000004059	ENSDART00000012600	25	1	1	TCCACCAAAAGTCAAGGTGCTGCT	6	+	21	1371
ENSDARG00000004059	ENSDART00000012600	25	5	5	TCCAGCTCCAGTGCGCTGGTGTG	5	+	439	1371
ENSDARG00000004059	ENSDART00000012600	25	7	7	CAAGGCAAAGCTAATCGAGTTTAAC	7	+	606	1371
ENSDARG00000004059	ENSDART00000012600	25	7	7	CACTTCAACATGAGGGTGGTGGA	5	+	721	1371
ENSDARG00000004059	ENSDART00000012600	25	7	7	CACTTCAACATGAGGGTGGTGGAG	6	+	721	1371
ENSDARG00000004059	ENSDART00000012600	25	7	7	ATCGCCAACTGCTGTGTGGAGAT	5	+	679	1371
ENSDARG00000004059	ENSDART00000012600	25	7	7	GCCAACTGCTGTGTGGAGATGAA	5	+	682	1371
ENSDARG00000004059	ENSDART00000012600	25	7	7	GTAATCGCCAACTGCTGTGTGGAG	6	+	676	1371
ENSDARG00000004059	ENSDART00000012600	25	8	8	TACAGCAGAGAGGAGATCTGCAGGA	7	+	889	1371
ENSDARG00000004059	ENSDART00000012600	25	9	9	CTCAGCGACTCATTTTAAGCTGTA	6	+	969	1371
ENSDARG00000004059	ENSDART00000012600	25	10	10	AAAAGCAGAGTTTATTTGTGACGAG	7	+	1322	1371
ENSDARG00000004059	ENSDART00000103351	25	1	1	TCCACCAAAAGTCAAGGTGCTGCT	6	+	21	1080
ENSDARG00000004059	ENSDART00000103351	25	5	5	TCCAGCTCCAGTGCGCTGGTGTG	5	+	439	1080
ENSDARG00000004059	ENSDART00000103351	25	7	7	GTAATCGCCAACTGCTGTGTGGAG	6	+	676	1080
ENSDARG00000004059	ENSDART00000103351	25	7	7	GCCAACTGCTGTGTGGAGATGAA	5	+	682	1080
ENSDARG00000004059	ENSDART00000103351	25	7	7	CACTTCAACATGAGGGTGGTGGAG	6	+	721	1080
ENSDARG00000004059	ENSDART00000103351	25	7	7	CACTTCAACATGAGGGTGGTGGA	5	+	721	1080
ENSDARG00000004059	ENSDART00000103351	25	7	7	CAAGGCAAAGCTAATCGAGTTTAAC	7	+	606	1080
ENSDARG00000004059	ENSDART00000103351	25	7	7	ATCGCCAACTGCTGTGTGGAGAT	5	+	679	1080
ENSDARG00000004059	ENSDART00000103351	25	8	8	TACAGCAGAGAGGAGATCTGCAGGA	7	+	889	1080
ENSDARG00000004059	ENSDART00000103351	25	9	9	CTCAGCGACTCATTTTAAGCTGTA	6	+	969	1080
ENSDARG00000004174	ENSDART00000017536	25	3	2	AGAGACAGCGTAATAGATGCCGGT	6	-	140	7125
ENSDARG00000004174	ENSDART00000017536	25	6	5	CAAACCCTCGAAGGTCTGCGTTGCT	7	-	418	7125
ENSDARG00000004174	ENSDART00000017536	25	6	5	CAAACCCTCGAAGGTCTGCGTTG	5	-	420	7125
ENSDARG00000004174	ENSDART00000017536	25	6	5	ACCAAACCCTCGAAGGTCTGCGTTG	7	-	420	7125
ENSDARG00000004174	ENSDART00000017536	25	7	6	AACCTCTGCACAGTGTTTTGAGGA	6	-	626	7125
ENSDARG00000004174	ENSDART00000017536	25	7	6	AACCTCTGCACAGTGTTTTGAGGAA	7	-	625	7125
ENSDARG00000004174	ENSDART00000017536	25	7	6	TGCTTCACAAACTGAGCAGCTGTA	6	-	438	7125
ENSDARG00000004174	ENSDART00000017536	25	7	6	GGCGTCCACGTACGAGCGGAGGAG	6	-	475	7125
ENSDARG00000004174	ENSDART00000017536	25	9	8	GCCGTCAGACAGCCCTGAGTGAGTG	7	-	906	7125
ENSDARG00000004174	ENSDART00000017536	25	10	9	CACCGCCCACTGGATTGGTGATGGT	7	-	943	7125
ENSDARG00000004174	ENSDART00000017536	25	10	9	CCCACCACCGCCCACTGGATTGGTG	7	-	948	7125
ENSDARG00000004174	ENSDART00000017536	25	10	9	CACCACCGCCCACTGGATTGGTG	5	-	948	7125
ENSDARG00000004174	ENSDART00000017536	25	10	9	ACCGCCCACTGGATTGGTGATGGT	6	-	943	7125
ENSDARG00000004174	ENSDART00000017536	25	10	9	AACTTCAACATTCCAGGCCTGAGAG	7	-	1005	7125
ENSDARG00000004174	ENSDART00000017536	25	12	11	GTTGTCATCCTCAGGTGGAGCCTTC	7	-	1311	7125
ENSDARG00000004174	ENSDART00000017536	25	16	15	CACCCATAATAGAGGGGCAGCGTCT	7	-	1873	7125
ENSDARG00000004174	ENSDART00000017536	25	16	15	GACTGCAAACATGCAAGCATGGTAG	7	-	1955	7125
ENSDARG00000004174	ENSDART00000017536	25	16	15	AACCACCCATAATAGAGGGGCAGCG	7	-	1876	7125
ENSDARG00000004174	ENSDART00000017536	25	17	16	AGCATCTAAACTGCTGGTGCTGGG	6	-	2101	7125
ENSDARG00000004174	ENSDART00000017536	25	19	18	TTACTCTGCTGGAAGGTTGGGGGG	6	-	2445	7125
ENSDARG00000004174	ENSDART00000017536	25	19	18	TTACTCTGCTGGAAGGTTGGGGG	5	-	2446	7125
ENSDARG00000004174	ENSDART00000017536	25	19	18	GAAGACATCACTGCTGACGGTGGG	6	-	2389	7125
ENSDARG00000004174	ENSDART00000017536	25	19	18	CTCATCTTCCTGGCGCTGAAGAC	5	-	2407	7125
ENSDARG00000004174	ENSDART00000017536	25	20	19	CTCGTCCACAGACATTGTGGGATGT	7	-	2565	7125
ENSDARG00000004174	ENSDART00000017536	25	20	19	ATCTCCTTACTAAAGTGCTGGTTTG	7	-	2492	7125
ENSDARG00000004174	ENSDART00000017536	25	20	19	GTCCACAGACATTGTGGGATGTG	5	-	2564	7125
ENSDARG00000004174	ENSDART00000017536	25	21	20	CCCCAAAGAGGCAGGCTGTGATGTG	7	-	2716	7125
ENSDARG00000004174	ENSDART00000017536	25	29	28	CAATTCTTCAGGAGGCTTGGTCT	5	-	3950	7125
ENSDARG00000004174	ENSDART00000017536	25	29	28	GTCTTCAGCTTATCTTTGTCTCT	5	-	3895	7125
ENSDARG00000004174	ENSDART00000017536	25	29	28	ACCTCAATCTCAAATTTGAGGTT	5	-	3817	7125
ENSDARG00000004174	ENSDART00000017536	25	31	30	TGCTTCAGCTGAGGGTGGGCCTGT	6	-	4155	7125
ENSDARG00000004174	ENSDART00000017536	25	31	30	CACTGCTTCAGCTGAGGGTGGGCC	6	-	4158	7125
ENSDARG00000004174	ENSDART00000017536	25	32	31	TCCTCCATCATCTCTCTCTGCTGGG	7	-	4451	7125
ENSDARG00000004174	ENSDART00000017536	25	32	31	TCCATCATCTCTCTCTGCTGGGGTG	7	-	4448	7125
ENSDARG00000004174	ENSDART00000017536	25	32	31	CTCCACTGCTGTTTTCTGGATAA	5	-	4523	7125
ENSDARG00000004174	ENSDART00000017536	25	32	31	TCCATCATCTCTCTCTGCTGGGGT	6	-	4449	7125
ENSDARG00000004174	ENSDART00000017536	25	34	33	TCCTCATAAACAGCCAGCTGTTTAG	7	-	4703	7125
ENSDARG00000004174	ENSDART00000017536	25	35	34	GACAACTGCCTCCAGCAGGCTAC	5	-	4928	7125
ENSDARG00000004174	ENSDART00000017536	25	37	36	CACTCAATCAGGCATCTGCAGGG	5	-	5137	7125
ENSDARG00000004174	ENSDART00000017536	25	38	37	TGCCACTGCCATGTAGTTGAGGCC	6	-	5266	7125
ENSDARG00000004174	ENSDART00000017536	25	38	37	AAATGCCACTGCCATGTAGTTGAG	6	-	5269	7125
ENSDARG00000004174	ENSDART00000017536	25	38	37	TTACCCTTCAGGAGCGTTGGCTCT	6	-	5404	7125
ENSDARG00000004174	ENSDART00000017536	25	39	38	GACAACATCCATAAGCTGTGGCA	5	-	5426	7125
ENSDARG00000004174	ENSDART00000017536	25	39	38	CTCTCAGCAGGTACTCTGCCTTT	5	-	5559	7125
ENSDARG00000004174	ENSDART00000017536	25	39	38	AACAAATGCAGAGAAGGCCTTGGTG	7	-	5625	7125
ENSDARG00000004174	ENSDART00000017536	25	40	39	TTAACCAGAAGGGCAATAAGCCGAA	7	-	5825	7125
ENSDARG00000004174	ENSDART00000017536	25	40	39	CTCTACACACATTTCTGTGCATAG	6	-	5710	7125
ENSDARG00000004174	ENSDART00000017536	25	41	40	TCCAGCACATGCTCTGGTGCGTTT	6	-	6009	7125
ENSDARG00000004174	ENSDART00000017536	25	41	40	GTCTCCAGCACATGCTCTGGTGCG	6	-	6012	7125
ENSDARG00000004174	ENSDART00000017536	25	42	41	TTAGTCGGCCTCAGGATGTGGAA	5	-	6073	7125
ENSDARG00000004174	ENSDART00000017536	25	42	41	GTCGGCCTCAGGATGTGGAAGGT	5	-	6070	7125
ENSDARG00000004174	ENSDART00000017536	25	43	42	AAACAAGTCTATCAGCAGCTGGG	5	-	6200	7125
ENSDARG00000004174	ENSDART00000017536	25	44	43	AGATTCCTCAGCTGGATGCAGTT	5	-	6376	7125
ENSDARG00000004174	ENSDART00000017536	25	44	43	TTCCTCAGCTGGATGCAGTTGGG	5	-	6373	7125
ENSDARG00000004174	ENSDART00000017536	25	45	44	TGCTGCGCAGCTCAGAGAGGAAGGT	7	-	6577	7125
ENSDARG00000004174	ENSDART00000017536	25	45	44	GGCATCACACCAGTGAAGTTTGT	5	-	6502	7125
ENSDARG00000004174	ENSDART00000017536	25	48	47	GCAGACCCCACGGGTGTGGCCTGT	6	-	6950	7125
ENSDARG00000004174	ENSDART00000017536	25	49	48	GTTCCCTCCATCACCTGCTGGGCC	6	-	7101	7125
ENSDARG00000004174	ENSDART00000017536	25	49	48	CCCTCCATCACCTGCTGGGCCTGC	6	-	7098	7125
ENSDARG00000004199	ENSDART00000018578	25	2	1	TGCTTCCACTCTTTGAGACTGGTAA	7	-	769	1317
ENSDARG00000004199	ENSDART00000018578	25	2	1	TGCCTCTTCGACCTGATGACGGA	5	-	812	1317
ENSDARG00000004199	ENSDART00000018578	25	2	1	CCCCACAGATACCTAGGTCGAAGGT	7	-	602	1317
ENSDARG00000004199	ENSDART00000018578	25	2	1	ACCTCATTCATGTAAAGCTTTTTTT	7	-	911	1317
ENSDARG00000004199	ENSDART00000018578	25	4	3	GAAATCATCTGAGTTGTTGTTTTT	6	-	1147	1317
ENSDARG00000004577	ENSDART00000026401	25	1	1	GAAGACCTCATCAAGAATGGTAA	5	+	373	891
ENSDARG00000004577	ENSDART00000026401	25	1	1	CAATTCAACCAACATGGGGCTCT	5	+	312	891
ENSDARG00000004577	ENSDART00000026401	25	1	1	AGCAAATGCTACAGGGTGGGATTTG	7	+	337	891
ENSDARG00000004577	ENSDART00000026401	25	1	1	AGCAAATGCTACAGGGTGGGATTT	6	+	337	891
ENSDARG00000004577	ENSDART00000026401	25	1	1	AAATGCTACAGGGTGGGATTTGAC	6	+	340	891
ENSDARG00000004577	ENSDART00000026401	25	3	3	GCCTCATGCATTACGTTGCCGGT	5	+	605	891
ENSDARG00000004785	ENSDART00000006124	25	5	5	ACCAAAGTCTGTCATTTTTGGCA	5	-	432	1329
ENSDARG00000004785	ENSDART00000006124	25	6	6	TTACTATACCTGACACGACTGATGT	7	-	534	1329
ENSDARG00000004785	ENSDART00000006124	25	8	8	TTCAAAAAAGTCTGTATGTGCCTTC	7	-	765	1329
ENSDARG00000004785	ENSDART00000006124	25	8	8	GAACGCTTCAAAAAAGTCTGTATGT	7	-	771	1329
ENSDARG00000004785	ENSDART00000006124	25	8	8	CTCTCCTTCTCTCAGGTGCATTT	5	-	737	1329
ENSDARG00000004785	ENSDART00000006124	25	13	13	TCCAACAGCTGATTGACTTGGTC	5	-	1216	1329
ENSDARG00000004785	ENSDART00000006124	25	13	13	CAATTCTACCATTGATTGTGCTGAA	7	-	1192	1329
ENSDARG00000004909	ENSDART00000007781	25	1	1	CCCAGCCCAGACAAGATGCTGCA	5	+	148	684
ENSDARG00000004909	ENSDART00000007781	25	1	1	AGCCCAGCCCAGACAAGATGCTGCA	7	+	146	684
ENSDARG00000004909	ENSDART00000007781	25	1	1	AGCCCAGACAAGATGCTGCAGGT	5	+	151	684
ENSDARG00000004909	ENSDART00000007781	25	3	3	TACAACAGCGCAGACGATGACAAC	6	+	409	684
ENSDARG00000004909	ENSDART00000007781	25	6	6	AGCGTCTGCTGTGGCTGCAGCTTCT	7	+	663	684
ENSDARG00000004909	ENSDART00000007781	25	6	6	TGCAGCTTCTAAGATGTGATTAC	5	+	678	684
ENSDARG00000004925	ENSDART00000010706	25	1	1	AACCACTAACAAATGCTTTGAAGTA	7	-	37	549
ENSDARG00000004925	ENSDART00000010706	25	1	1	AGAAACCACTAACAAATGCTTTGAA	7	-	40	549
ENSDARG00000004925	ENSDART00000010706	25	2	2	TTCCTCACACTCCAGCGGTTGAGCA	7	-	185	549
ENSDARG00000004925	ENSDART00000010706	25	2	2	TTCCTCACACTCCAGCGGTTGAG	5	-	187	549
ENSDARG00000004925	ENSDART00000010706	25	2	2	TCCTCACACTCCAGCGGTTGAGCA	6	-	185	549
ENSDARG00000004925	ENSDART00000010706	25	2	2	AGCAGCACAACATCAGGTGAAGAC	6	-	165	549
ENSDARG00000004925	ENSDART00000010706	25	4	4	ACCGGCCCAAATGCGTTGCTGTC	5	-	394	549
ENSDARG00000004925	ENSDART00000073667	25	1	1	AACCACTAACAAATGCTTTGAAGTA	7	-	37	243
ENSDARG00000004925	ENSDART00000073667	25	1	1	AGAAACCACTAACAAATGCTTTGAA	7	-	40	243
ENSDARG00000004925	ENSDART00000073667	25	2	2	TTCCTCACACTCCAGCGGTTGAGCA	7	-	185	243
ENSDARG00000004925	ENSDART00000073667	25	2	2	TTCCTCACACTCCAGCGGTTGAG	5	-	187	243
ENSDARG00000004925	ENSDART00000073667	25	2	2	TCCTCACACTCCAGCGGTTGAGCA	6	-	185	243
ENSDARG00000004925	ENSDART00000073667	25	2	2	AGCAGCACAACATCAGGTGAAGAC	6	-	165	243
ENSDARG00000005095	ENSDART00000014274	25	2	1	GAAGACCCCATCCGGGTGGTAGGGC	7	-	414	1764
ENSDARG00000005095	ENSDART00000014274	25	2	1	GAAGACCCCATCCGGGTGGTAGGG	6	-	415	1764
ENSDARG00000005095	ENSDART00000014274	25	2	1	CTCCTCTTCTTTCTCCGGGGTGGGG	7	-	153	1764
ENSDARG00000005095	ENSDART00000014274	25	2	1	ACCTTCCACACCACTGATGCATTT	6	-	481	1764
ENSDARG00000005095	ENSDART00000014274	25	2	1	AACATCTTCATTAATGAGGCAGTC	6	-	238	1764
ENSDARG00000005095	ENSDART00000014274	25	4	3	GAAGGCAGCCATGTGTGCAGTGGAA	7	-	1113	1764
ENSDARG00000005095	ENSDART00000014274	25	4	3	TGCGGCCCCAAGGTACGAGGGGTTG	7	-	1308	1764
ENSDARG00000005274	ENSDART00000017488	25	1	1	TACAACAAACACGTGTTTTGGGC	5	+	51	1227
ENSDARG00000005274	ENSDART00000017488	25	1	1	TACAACAAACACGTGTTTTGGGCA	6	+	51	1227
ENSDARG00000005274	ENSDART00000017488	25	1	1	AACAAACACGTGTTTTGGGCAGGT	6	+	54	1227
ENSDARG00000005274	ENSDART00000017488	25	2	2	GCACCAGACAGGCTGGAGGAGGAC	6	+	149	1227
ENSDARG00000005274	ENSDART00000017488	25	2	2	GCACCAGACAGGCTGGAGGAGGA	5	+	149	1227
ENSDARG00000005274	ENSDART00000017488	25	2	2	AGCACCAGACAGGCTGGAGGAGGA	6	+	148	1227
ENSDARG00000005274	ENSDART00000017488	25	2	2	AGCACCAGACAGGCTGGAGGAGGAC	7	+	148	1227
ENSDARG00000005274	ENSDART00000017488	25	2	2	ATCAGCACCAGACAGGCTGGAGGA	6	+	145	1227
ENSDARG00000005274	ENSDART00000017488	25	7	7	AAACCAAACGTAGCGATTTGGAGCC	7	+	560	1227
ENSDARG00000005274	ENSDART00000017488	25	7	7	CTCCTCCTCCTTTGGACGCAGAC	5	+	536	1227
ENSDARG00000005274	ENSDART00000017488	25	7	7	CCCAGCAACACCTCCAGGTGAATTT	7	+	796	1227
ENSDARG00000005274	ENSDART00000017488	25	7	7	AAAACCAAACGTAGCGATTTGGAG	6	+	559	1227
ENSDARG00000005274	ENSDART00000017488	25	7	7	AAACCAAACGTAGCGATTTGGAG	5	+	560	1227
ENSDARG00000005274	ENSDART00000017488	25	7	7	GCCTCCTCCTCCTTTGGACGCAGAC	7	+	534	1227
ENSDARG00000005274	ENSDART00000017488	25	7	7	AACATCCCCATAGAGCAGATGGG	5	+	661	1227
ENSDARG00000005274	ENSDART00000017488	25	8	8	GACAGCAGCAGCTGCAGCAGAAGTT	7	+	884	1227
ENSDARG00000005274	ENSDART00000017488	25	8	8	GTCCTCGTCTGATCCTCTGCTGGA	6	+	837	1227
ENSDARG00000005274	ENSDART00000017488	25	9	9	ACCAAACCAGCACACGATGACGAC	6	+	1074	1227
ENSDARG00000005274	ENSDART00000017488	25	9	9	CACCAAACCAGCACACGATGACGAC	7	+	1073	1227
ENSDARG00000005274	ENSDART00000017488	25	10	10	AGACACGGCCAGATGATGAAGAA	5	+	1198	1227
ENSDARG00000005274	ENSDART00000079012	25	1	1	TACAACAAACACGTGTTTTGGGC	5	+	51	1302
ENSDARG00000005274	ENSDART00000079012	25	1	1	TACAACAAACACGTGTTTTGGGCA	6	+	51	1302
ENSDARG00000005274	ENSDART00000079012	25	1	1	AACAAACACGTGTTTTGGGCAGGT	6	+	54	1302
ENSDARG00000005274	ENSDART00000079012	25	2	2	ATCAGCACCAGACAGGCTGGAGGA	6	+	145	1302
ENSDARG00000005274	ENSDART00000079012	25	2	2	GCACCAGACAGGCTGGAGGAGGAC	6	+	149	1302
ENSDARG00000005274	ENSDART00000079012	25	2	2	GCACCAGACAGGCTGGAGGAGGA	5	+	149	1302
ENSDARG00000005274	ENSDART00000079012	25	2	2	AGCACCAGACAGGCTGGAGGAGGAC	7	+	148	1302
ENSDARG00000005274	ENSDART00000079012	25	2	2	AGCACCAGACAGGCTGGAGGAGGA	6	+	148	1302
ENSDARG00000005274	ENSDART00000079012	25	7	7	AAACCAAACGTAGCGATTTGGAGCC	7	+	560	1302
ENSDARG00000005274	ENSDART00000079012	25	7	7	AAAACCAAACGTAGCGATTTGGAG	6	+	559	1302
ENSDARG00000005274	ENSDART00000079012	25	7	7	AAACCAAACGTAGCGATTTGGAG	5	+	560	1302
ENSDARG00000005274	ENSDART00000079012	25	7	7	GCCTCCTCCTCCTTTGGACGCAGAC	7	+	534	1302
ENSDARG00000005274	ENSDART00000079012	25	7	7	AACATCCCCATAGAGCAGATGGG	5	+	661	1302
ENSDARG00000005274	ENSDART00000079012	25	7	7	CTCCTCCTCCTTTGGACGCAGAC	5	+	536	1302
ENSDARG00000005274	ENSDART00000079012	25	7	7	CCCAGCAACACCTCCAGGTGAATTT	7	+	796	1302
ENSDARG00000005274	ENSDART00000079012	25	8	8	GACAGCAGCAGCTGCAGCAGAAGTT	7	+	884	1302
ENSDARG00000005274	ENSDART00000079012	25	8	8	GTCCTCGTCTGATCCTCTGCTGGA	6	+	837	1302
ENSDARG00000005274	ENSDART00000079012	25	10	10	CACCAAACCAGCACACGATGACGAC	7	+	1148	1302
ENSDARG00000005274	ENSDART00000079012	25	10	10	ACCAAACCAGCACACGATGACGAC	6	+	1149	1302
ENSDARG00000005274	ENSDART00000079012	25	11	11	AGACACGGCCAGATGATGAAGAA	5	+	1273	1302
ENSDARG00000005446	ENSDART00000045607	25	3	2	TGCTGCCTCCAATCCTTTGAGTTG	6	-	199	2970
ENSDARG00000005446	ENSDART00000045607	25	7	6	CTCGGCCTCCATGTGCTGGATAA	5	-	605	2970
ENSDARG00000005446	ENSDART00000045607	25	7	6	AGACTCGGCCTCCATGTGCTGGA	5	-	608	2970
ENSDARG00000005446	ENSDART00000045607	25	10	9	GGCCGCTCCTGTTTGGTTGAGGG	5	-	1213	2970
ENSDARG00000005446	ENSDART00000045607	25	10	9	GGCCGCTCCTGTTTGGTTGAGGGT	6	-	1212	2970
ENSDARG00000005446	ENSDART00000045607	25	11	10	AACTTCATCCAGTTTGTGCTGCA	5	-	1436	2970
ENSDARG00000005446	ENSDART00000045607	25	13	12	AGCCGCAGCTGCATGAAGGTGGC	5	-	1678	2970
ENSDARG00000005446	ENSDART00000045607	25	13	12	CGCAGCTGCATGAAGGTGGCGAT	5	-	1675	2970
ENSDARG00000005446	ENSDART00000045607	25	14	13	CTCTCCATCGAGAACAGCTGAAAAC	7	-	1781	2970
ENSDARG00000005446	ENSDART00000045607	25	16	15	GTCTGCAGAGCGTGTGCAGCAGTG	6	-	2204	2970
ENSDARG00000005446	ENSDART00000045607	25	19	18	CGCTCAGACTCGATCATGCGCAGGC	7	-	2567	2970
ENSDARG00000005446	ENSDART00000045607	25	20	19	TTCTCCAGCCCGCGCCGCTGTCGTA	7	-	2735	2970
ENSDARG00000005446	ENSDART00000045607	25	21	20	GACTCCTTCAGCTGGGATAGTTT	5	-	2839	2970
ENSDARG00000005446	ENSDART00000045607	25	21	20	TCCAGCCTCTTCTTGAGGTCGTC	5	-	2935	2970
ENSDARG00000005446	ENSDART00000047151	25	2	2	TGCTGCCTCCAATCCTTTGAGTTG	6	-	199	1698
ENSDARG00000005446	ENSDART00000047151	25	3	3	AGCGACGACAATCTTGGGGTTCT	5	-	413	1698
ENSDARG00000005446	ENSDART00000047151	25	3	3	GCAAGCGACGACAATCTTGGGGT	5	-	416	1698
ENSDARG00000005446	ENSDART00000047151	25	4	4	GGCTTCGTCTCGAACTGCCTTTTCT	7	-	534	1698
ENSDARG00000005446	ENSDART00000047151	25	4	4	CTCCACTGCCAGTAATTTGGCTTC	6	-	553	1698
ENSDARG00000005446	ENSDART00000047151	25	5	5	TGCTTCATCTCCTCCTGCAGCCTGT	7	-	741	1698
ENSDARG00000005446	ENSDART00000047151	25	5	5	TCCTCCTGCAGCCTGTTGCTGCT	5	-	734	1698
ENSDARG00000005446	ENSDART00000047151	25	5	5	AGAATCTAATCTGTTTAGGAGCT	5	-	678	1698
ENSDARG00000005446	ENSDART00000047151	25	8	8	CAATCCAGCCAAGCATTTGGCTGC	6	-	1027	1698
ENSDARG00000005446	ENSDART00000047151	25	8	8	TGCCAATCCAGCCAAGCATTTGGC	6	-	1030	1698
ENSDARG00000005446	ENSDART00000047151	25	9	9	TTAAACTTCTCCAAGATGGTTGGCA	7	-	1097	1698
ENSDARG00000005446	ENSDART00000047151	25	10	10	AACATCCTCACTGATGTTTTGCA	5	-	1190	1698
ENSDARG00000005446	ENSDART00000047151	25	11	11	CTCAAAAGCAGCATCTCTGACTTC	6	-	1369	1698
ENSDARG00000005446	ENSDART00000047151	25	11	11	ACATCAGTCAAGAATGGGTTGAC	5	-	1432	1698
ENSDARG00000005446	ENSDART00000047151	25	11	11	TCCCAAAGCCTCAAAAGCAGCATCT	7	-	1377	1698
ENSDARG00000005446	ENSDART00000047151	25	11	11	GTCAACATCAGTCAAGAATGGGTT	6	-	1435	1698
ENSDARG00000005446	ENSDART00000047151	25	11	11	CCCAAAGCCTCAAAAGCAGCATCT	6	-	1377	1698
ENSDARG00000005446	ENSDART00000047151	25	12	12	TGCTTCAACAGGTGGAGATGCTTTT	7	-	1557	1698
ENSDARG00000005446	ENSDART00000103781	25	2	2	TGCTGCCTCCAATCCTTTGAGTTG	6	-	199	5958
ENSDARG00000005446	ENSDART00000103781	25	3	3	GCAAGCGACGACAATCTTGGGGT	5	-	416	5958
ENSDARG00000005446	ENSDART00000103781	25	3	3	AGCGACGACAATCTTGGGGTTCT	5	-	413	5958
ENSDARG00000005446	ENSDART00000103781	25	4	4	CTCCACTGCCAGTAATTTGGCTTC	6	-	553	5958
ENSDARG00000005446	ENSDART00000103781	25	4	4	GGCTTCGTCTCGAACTGCCTTTTCT	7	-	534	5958
ENSDARG00000005446	ENSDART00000103781	25	5	5	TCCTCCTGCAGCCTGTTGCTGCT	5	-	734	5958
ENSDARG00000005446	ENSDART00000103781	25	5	5	TGCTTCATCTCCTCCTGCAGCCTGT	7	-	741	5958
ENSDARG00000005446	ENSDART00000103781	25	5	5	AGAATCTAATCTGTTTAGGAGCT	5	-	678	5958
ENSDARG00000005446	ENSDART00000103781	25	8	8	TGCCAATCCAGCCAAGCATTTGGC	6	-	1030	5958
ENSDARG00000005446	ENSDART00000103781	25	8	8	CAATCCAGCCAAGCATTTGGCTGC	6	-	1027	5958
ENSDARG00000005446	ENSDART00000103781	25	9	9	TTAAACTTCTCCAAGATGGTTGGCA	7	-	1097	5958
ENSDARG00000005446	ENSDART00000103781	25	10	10	AACATCCTCACTGATGTTTTGCA	5	-	1190	5958
ENSDARG00000005446	ENSDART00000103781	25	11	11	TCCCAAAGCCTCAAAAGCAGCATCT	7	-	1377	5958
ENSDARG00000005446	ENSDART00000103781	25	11	11	GTCAACATCAGTCAAGAATGGGTT	6	-	1435	5958
ENSDARG00000005446	ENSDART00000103781	25	11	11	ACATCAGTCAAGAATGGGTTGAC	5	-	1432	5958
ENSDARG00000005446	ENSDART00000103781	25	11	11	CCCAAAGCCTCAAAAGCAGCATCT	6	-	1377	5958
ENSDARG00000005446	ENSDART00000103781	25	11	11	CTCAAAAGCAGCATCTCTGACTTC	6	-	1369	5958
ENSDARG00000005446	ENSDART00000103781	25	12	12	TGCTTCAACAGGTGGAGATGCTTTT	7	-	1557	5958
ENSDARG00000005446	ENSDART00000103781	25	14	14	AGCAGCTGCATACAGGAGGCTGGG	6	-	1713	5958
ENSDARG00000005446	ENSDART00000103781	25	14	14	CTCTCCTTCCAGTTGGCGCTGTC	5	-	1738	5958
ENSDARG00000005446	ENSDART00000103781	25	16	16	CAACTAGCCCCACGATGCTGAGCT	6	-	1895	5958
ENSDARG00000005446	ENSDART00000103781	25	16	16	TGCTCAGCAGTCCATGGCAGAGAAC	7	-	2042	5958
ENSDARG00000005446	ENSDART00000103781	25	16	16	AGAACCACCAGTGCAGACGTTTTT	6	-	1938	5958
ENSDARG00000005446	ENSDART00000103781	25	17	17	TTCAACGTCTCTGCTTGGTTTTTAG	7	-	2099	5958
ENSDARG00000005446	ENSDART00000103781	25	17	17	TCCAAACTCCTTCATGGCATTGGCC	7	-	2130	5958
ENSDARG00000005446	ENSDART00000103781	25	18	18	GCACCCAGAGCAGTTTTGACGTT	5	-	2188	5958
ENSDARG00000005446	ENSDART00000103781	25	19	19	CCCAAAAGAGCGATTGCAGACGTC	6	-	2229	5958
ENSDARG00000005446	ENSDART00000103781	25	19	19	ATCTTCAAAGAACATGCGCAGAG	5	-	2279	5958
ENSDARG00000005446	ENSDART00000103781	25	20	20	CTCCTCTGCTCCTGCTTTTTTGGCT	7	-	2382	5958
ENSDARG00000005446	ENSDART00000103781	25	20	20	CTCCTCTGCTCCTGCTTTTTTGGC	6	-	2383	5958
ENSDARG00000005446	ENSDART00000103781	25	20	20	ATCCTCCTCTGCTCCTGCTTTTTTG	7	-	2385	5958
ENSDARG00000005446	ENSDART00000103781	25	23	23	TTAAGCGTCGCCATGGCAGTAGCA	6	-	2787	5958
ENSDARG00000005446	ENSDART00000103781	25	24	24	GCAGGCACCGTACGCAGGGTGGGCA	7	-	2930	5958
ENSDARG00000005446	ENSDART00000103781	25	25	25	AACATCACCTGATGCTGTTTTGGC	6	-	3217	5958
ENSDARG00000005446	ENSDART00000103781	25	25	25	GCCAACCACCTGGTCCTTAGAGGCC	7	-	3102	5958
ENSDARG00000005446	ENSDART00000103781	25	25	25	TGCTGCAGCTTTGGCAGGAGCTGCA	7	-	3165	5958
ENSDARG00000005446	ENSDART00000103781	25	25	25	AGATGCTGCAGCTTTGGCAGGAGCT	7	-	3168	5958
ENSDARG00000005446	ENSDART00000103781	25	25	25	AACATCACCTGATGCTGTTTTGGCA	7	-	3216	5958
ENSDARG00000005446	ENSDART00000103781	25	26	26	TGCCACACCTTTTTAGCCGCAGGA	6	-	3309	5958
ENSDARG00000005446	ENSDART00000103781	25	27	27	TGCGCCAGCCTTAACAGGAGGTTTC	7	-	3339	5958
ENSDARG00000005446	ENSDART00000103781	25	29	29	CTCGGCCTCCATGTGCTGGATAA	5	-	3593	5958
ENSDARG00000005446	ENSDART00000103781	25	29	29	AGACTCGGCCTCCATGTGCTGGA	5	-	3596	5958
ENSDARG00000005446	ENSDART00000103781	25	32	32	GGCCGCTCCTGTTTGGTTGAGGGT	6	-	4200	5958
ENSDARG00000005446	ENSDART00000103781	25	32	32	GGCCGCTCCTGTTTGGTTGAGGG	5	-	4201	5958
ENSDARG00000005446	ENSDART00000103781	25	33	33	AACTTCATCCAGTTTGTGCTGCA	5	-	4424	5958
ENSDARG00000005446	ENSDART00000103781	25	35	35	CGCAGCTGCATGAAGGTGGCGAT	5	-	4663	5958
ENSDARG00000005446	ENSDART00000103781	25	35	35	AGCCGCAGCTGCATGAAGGTGGC	5	-	4666	5958
ENSDARG00000005446	ENSDART00000103781	25	36	36	CTCTCCATCGAGAACAGCTGAAAAC	7	-	4769	5958
ENSDARG00000005446	ENSDART00000103781	25	38	38	GTCTGCAGAGCGTGTGCAGCAGTG	6	-	5192	5958
ENSDARG00000005446	ENSDART00000103781	25	41	41	CGCTCAGACTCGATCATGCGCAGGC	7	-	5555	5958
ENSDARG00000005446	ENSDART00000103781	25	42	42	TTCTCCAGCCCGCGCCGCTGTCGTA	7	-	5726	5958
ENSDARG00000005446	ENSDART00000103781	25	43	43	TCCAGCCTCTTCTTGAGGTCGTC	5	-	5923	5958
ENSDARG00000005446	ENSDART00000103781	25	43	43	GACTCCTTCAGCTGGGATAGTTT	5	-	5827	5958
ENSDARG00000005446	ENSDART00000103783	25	3	2	TGCTGCCTCCAATCCTTTGAGTTG	6	-	199	2982
ENSDARG00000005446	ENSDART00000103783	25	7	6	CTCGGCCTCCATGTGCTGGATAA	5	-	617	2982
ENSDARG00000005446	ENSDART00000103783	25	7	6	AGACTCGGCCTCCATGTGCTGGA	5	-	620	2982
ENSDARG00000005446	ENSDART00000103783	25	10	9	GGCCGCTCCTGTTTGGTTGAGGG	5	-	1225	2982
ENSDARG00000005446	ENSDART00000103783	25	10	9	GGCCGCTCCTGTTTGGTTGAGGGT	6	-	1224	2982
ENSDARG00000005446	ENSDART00000103783	25	11	10	AACTTCATCCAGTTTGTGCTGCA	5	-	1448	2982
ENSDARG00000005446	ENSDART00000103783	25	13	12	AGCCGCAGCTGCATGAAGGTGGC	5	-	1690	2982
ENSDARG00000005446	ENSDART00000103783	25	13	12	CGCAGCTGCATGAAGGTGGCGAT	5	-	1687	2982
ENSDARG00000005446	ENSDART00000103783	25	14	13	CTCTCCATCGAGAACAGCTGAAAAC	7	-	1793	2982
ENSDARG00000005446	ENSDART00000103783	25	16	15	GTCTGCAGAGCGTGTGCAGCAGTG	6	-	2216	2982
ENSDARG00000005446	ENSDART00000103783	25	19	18	CGCTCAGACTCGATCATGCGCAGGC	7	-	2579	2982
ENSDARG00000005446	ENSDART00000103783	25	20	19	TTCTCCAGCCCGCGCCGCTGTCGTA	7	-	2747	2982
ENSDARG00000005446	ENSDART00000103783	25	21	20	GACTCCTTCAGCTGGGATAGTTT	5	-	2851	2982
ENSDARG00000005446	ENSDART00000103783	25	21	20	TCCAGCCTCTTCTTGAGGTCGTC	5	-	2947	2982
ENSDARG00000005485	ENSDART00000003665	25	3	3	TTCTTCAAACGGAGAAGCAGGAGAG	7	+	169	405
ENSDARG00000005485	ENSDART00000003665	25	3	3	GCCAGCTTCTTCAAACGGAGAAGCA	7	+	163	405
ENSDARG00000005485	ENSDART00000003665	25	3	3	AGCTTCTTCAAACGGAGAAGCAGGA	7	+	166	405
ENSDARG00000005485	ENSDART00000003665	25	4	4	TGCCGCAGATGAGAGAAGGAGGG	5	+	240	405
ENSDARG00000005485	ENSDART00000003665	25	4	4	AGAGACAGAGACTTGCCGCAGAT	5	+	227	405
ENSDARG00000005841	ENSDART00000007197	25	2	2	TGCAAAAGATTTACTGGAAGCTGAG	7	+	72	534
ENSDARG00000005841	ENSDART00000007197	25	4	4	CTATGCTTCAGGCTCTGCTGGGCT	6	+	359	534
ENSDARG00000005841	ENSDART00000007197	25	4	4	ACCTCAAACAAGTCAAGAAGGAGGT	7	+	416	534
ENSDARG00000005913	ENSDART00000041912	25	2	2	ACAATCACCAGTGTGCCGTTGGG	5	-	223	2064
ENSDARG00000005913	ENSDART00000041912	25	5	5	TGCTGCCACACCAGGCTGTTGGA	5	-	753	2064
ENSDARG00000005913	ENSDART00000041912	25	5	5	TACTCCTCCACATTTGTGGTATTG	6	-	790	2064
ENSDARG00000005913	ENSDART00000041912	25	5	5	GTACTCCTCCACATTTGTGGTATTG	7	-	790	2064
ENSDARG00000005913	ENSDART00000041912	25	8	8	GCCCACAGCCTTGGTGCTGATGCA	6	-	1279	2064
ENSDARG00000005913	ENSDART00000041912	25	9	9	GCAGCCGACAGCTGGCTGTGGAG	5	-	1540	2064
ENSDARG00000005913	ENSDART00000041912	25	9	9	GCAGCCGACAGCTGGCTGTGGAGGG	7	-	1538	2064
ENSDARG00000005913	ENSDART00000041912	25	9	9	GCCGACAGCTGGCTGTGGAGGGT	5	-	1537	2064
ENSDARG00000005913	ENSDART00000041912	25	9	9	GTAAGCAGCCGACAGCTGGCTGT	5	-	1544	2064
ENSDARG00000005913	ENSDART00000041912	25	9	9	TTCTTCACCAAGGACTTGTGGATGC	7	-	1574	2064
ENSDARG00000005913	ENSDART00000041912	25	9	9	ATCCTCGGCGCAGGGCAGAGGAT	5	-	1412	2064
ENSDARG00000005913	ENSDART00000041912	25	11	11	GACCCAGTCCCTCAATGCGGAAGAT	7	-	1879	2064
ENSDARG00000005913	ENSDART00000041912	25	12	12	CAATCCAGAGATGCCAGAAGCTTGT	7	-	1997	2064
ENSDARG00000006145	ENSDART00000004959	25	2	1	CACCTCAAAAAAGTGCGGATGAGGT	7	-	540	1689
ENSDARG00000006145	ENSDART00000004959	25	2	1	ATCGTCTTCTGATGTGTTGTGGTG	6	-	34	1689
ENSDARG00000006145	ENSDART00000004959	25	2	1	AGCATCGTCCGTCAGGAGAGAAC	5	-	237	1689
ENSDARG00000006145	ENSDART00000004959	25	2	1	CTCAAAAAAGTGCGGATGAGGTT	5	-	539	1689
ENSDARG00000006145	ENSDART00000004959	25	2	1	GAAATCGTCTTCTGATGTGTTGTG	6	-	37	1689
ENSDARG00000006145	ENSDART00000004959	25	2	1	ACCTCAAAAAAGTGCGGATGAGGTT	7	-	539	1689
ENSDARG00000006145	ENSDART00000004959	25	2	1	ACCTCAAAAAAGTGCGGATGAGGT	6	-	540	1689
ENSDARG00000006145	ENSDART00000004959	25	2	1	TCCGACGCCTTTCTAGCCGGTGGA	6	-	101	1689
ENSDARG00000006145	ENSDART00000004959	25	2	1	CACCTCAAAAAAGTGCGGATGAG	5	-	542	1689
ENSDARG00000006145	ENSDART00000004959	25	3	2	TGCATCTTCCACATACGCAGCTGTC	7	-	1025	1689
ENSDARG00000006145	ENSDART00000004959	25	3	2	AGAAGCGGCGTTTGGCTGTGGCGCT	7	-	979	1689
ENSDARG00000006145	ENSDART00000004959	25	3	2	AGAAGCGGCGTTTGGCTGTGGCG	5	-	981	1689
ENSDARG00000006145	ENSDART00000004959	25	3	2	AACAGCAGAAAGAGTAAGCAGGT	5	-	836	1689
ENSDARG00000006145	ENSDART00000004959	25	4	3	GTAGACTACGAAGAAAGAGGGCTAA	7	-	1125	1689
ENSDARG00000006145	ENSDART00000004959	25	4	3	AACTGCACAGCCTCGCTGTGAAGAG	7	-	1247	1689
ENSDARG00000006145	ENSDART00000004959	25	5	4	GGCTGCTGCTGTAAGACTGAGCA	5	-	1401	1689
ENSDARG00000006145	ENSDART00000004959	25	6	5	CAACCCAGAATCTCTCGCGTAGAAC	7	-	1512	1689
ENSDARG00000006145	ENSDART00000004959	25	6	5	GTTGACAACGTATTCGGCGTTGGTT	7	-	1650	1689
ENSDARG00000006145	ENSDART00000004959	25	6	5	GTTGACAACGTATTCGGCGTTGGT	6	-	1651	1689
ENSDARG00000006145	ENSDART00000004959	25	6	5	GTTCGCTGCACGGAGATGGCGAA	5	-	1630	1689
ENSDARG00000006172	ENSDART00000021017	25	1	1	AAACCAGTCTGCTAGAAGCTGTT	5	+	35	1083
ENSDARG00000006172	ENSDART00000021017	25	3	3	AAATTCAGAGTCACTTGCTGCTGTA	7	+	189	1083
ENSDARG00000006172	ENSDART00000021017	25	9	9	TTCAGCAGAAACTCTTTGTGGTA	5	+	701	1083
ENSDARG00000006172	ENSDART00000021017	25	9	9	GTCTGCAAACCTGGGGAGGAGCG	5	+	640	1083
ENSDARG00000006172	ENSDART00000021017	25	11	11	TCCAGCACAGTCAGAGTTTGCTGCA	7	+	797	1083
ENSDARG00000006172	ENSDART00000021017	25	11	11	CCCTCCAGCACAGTCAGAGTTTGCT	7	+	794	1083
ENSDARG00000006172	ENSDART00000021017	25	12	12	GAAGACAGCTTTGCTCGCATGAGAG	7	+	934	1083
ENSDARG00000006462	ENSDART00000043582	25	1	1	CTAAAACACTGTTTAGCAGCCGGG	6	-	63	1197
ENSDARG00000006462	ENSDART00000043582	25	1	1	TACCTCAACCTCCAGAAGGTGGG	5	-	182	1197
ENSDARG00000006462	ENSDART00000043582	25	1	1	TTCCTAAAACACTGTTTAGCAGCC	6	-	66	1197
ENSDARG00000006462	ENSDART00000043582	25	3	3	GTCCACCACGTCCAGCAGAGGAT	5	-	362	1197
ENSDARG00000006462	ENSDART00000043582	25	3	3	CACCACGTCCAGCAGAGGATAGGCC	7	-	357	1197
ENSDARG00000006462	ENSDART00000043582	25	5	5	CACATCCACAATGAGCTGCAGGT	5	-	482	1197
ENSDARG00000006462	ENSDART00000043582	25	5	5	GCCAGCACAGGGATGTGTGGGTA	5	-	550	1197
ENSDARG00000006462	ENSDART00000043582	25	5	5	GCCAGCACAGGGATGTGTGGGTAA	6	-	549	1197
ENSDARG00000006462	ENSDART00000043582	25	6	6	GTCTCACCCAATGGCGTAGAGTCT	6	-	790	1197
ENSDARG00000006462	ENSDART00000043582	25	7	7	ATCGTCACAGTGCAGATCTGCTGCC	7	-	921	1197
ENSDARG00000006600	ENSDART00000023453	25	3	3	GTTTCCAGACTGGAAGGATGATGGA	7	-	321	1329
ENSDARG00000006600	ENSDART00000023453	25	5	5	TGCGGCCCAATCCTGGCGCAGCA	5	-	618	1329
ENSDARG00000006600	ENSDART00000023453	25	5	5	GCAGACTCCACTGGTGGGCTTTT	5	-	562	1329
ENSDARG00000006600	ENSDART00000023453	25	5	5	GACGGCAGACTCCACTGGTGGGCT	6	-	565	1329
ENSDARG00000006600	ENSDART00000023453	25	6	6	GTTTGCACCTTTCAGCTTGAGTT	5	-	878	1329
ENSDARG00000006600	ENSDART00000023453	25	6	6	CGCGGCCACGCCGAGCAGCAGGA	5	-	723	1329
ENSDARG00000006600	ENSDART00000023453	25	6	6	GGCCACGCCGAGCAGCAGGAGGA	5	-	720	1329
ENSDARG00000006600	ENSDART00000023453	25	7	7	GTTTCCTTCACTGTTCTGAGTGT	5	-	947	1329
ENSDARG00000006600	ENSDART00000023453	25	7	7	GTTGTCAAAGAATGATTTGGTTTT	6	-	1012	1329
ENSDARG00000006600	ENSDART00000023453	25	9	9	CTCCTCCGCCCAGGTCTGCCTGT	5	-	1100	1329
ENSDARG00000006600	ENSDART00000023453	25	9	9	CGCTCCTCCGCCCAGGTCTGCCTGT	7	-	1100	1329
ENSDARG00000006600	ENSDART00000041893	25	3	3	GTTTCCAGACTGGAAGGATGATGGA	7	-	321	729
ENSDARG00000006600	ENSDART00000041893	25	5	5	GACGGCAGACTCCACTGGTGGGCT	6	-	565	729
ENSDARG00000006600	ENSDART00000041893	25	5	5	GCAGACTCCACTGGTGGGCTTTT	5	-	562	729
ENSDARG00000006600	ENSDART00000041893	25	7	7	GGCCACGCCGAGCAGCAGGAGGA	5	-	655	729
ENSDARG00000006600	ENSDART00000041893	25	7	7	CGCGGCCACGCCGAGCAGCAGGA	5	-	658	729
ENSDARG00000006791	ENSDART00000023959	25	3	1	CCCTTCCTCTTGCGGTTGTAGTC	5	-	109	1878
ENSDARG00000006791	ENSDART00000023959	25	8	6	ACACCCTTAAAATCAAGTGTTTTAA	7	-	460	1878
ENSDARG00000006791	ENSDART00000023959	25	8	6	GTTGGCTTCTGTGTATGGGTTGGTG	7	-	405	1878
ENSDARG00000006791	ENSDART00000023959	25	8	6	GTTGGCTTCTGTGTATGGGTTGGT	6	-	406	1878
ENSDARG00000006791	ENSDART00000023959	25	12	10	CTAAGCCCATCTTGGTGGGCGGCC	6	-	893	1878
ENSDARG00000006791	ENSDART00000023959	25	12	10	CTAAGCCCATCTTGGTGGGCGGC	5	-	894	1878
ENSDARG00000006791	ENSDART00000023959	25	12	10	GGCCACTAAACAGCTGAGGTTGCA	6	-	946	1878
ENSDARG00000006791	ENSDART00000023959	25	14	12	CTAATCTTCTCTCGCATCTGTAGCA	7	-	1196	1878
ENSDARG00000006791	ENSDART00000023959	25	17	15	AGCCACAGCTGGAGGGGGAGGAGCC	7	-	1552	1878
ENSDARG00000006791	ENSDART00000023959	25	17	15	AGCCACAGCTGGAGGGGGAGGAG	5	-	1554	1878
ENSDARG00000006791	ENSDART00000023959	25	18	16	CACTCATTAATGAATTATTTGAA	5	-	1713	1878
ENSDARG00000006791	ENSDART00000023959	25	19	17	TGCTTCATCATTACTGGGGCTGC	5	-	1781	1878
ENSDARG00000006791	ENSDART00000023959	25	19	17	TGCTTCATCATTACTGGGGCTGCT	6	-	1780	1878
ENSDARG00000006791	ENSDART00000067298	25	1	1	CCCTTCCTCTTGCGGTTGTAGTC	5	-	109	1878
ENSDARG00000006791	ENSDART00000067298	25	6	6	GTTGGCTTCTGTGTATGGGTTGGTG	7	-	405	1878
ENSDARG00000006791	ENSDART00000067298	25	6	6	GTTGGCTTCTGTGTATGGGTTGGT	6	-	406	1878
ENSDARG00000006791	ENSDART00000067298	25	6	6	ACACCCTTAAAATCAAGTGTTTTAA	7	-	460	1878
ENSDARG00000006791	ENSDART00000067298	25	10	10	CTAAGCCCATCTTGGTGGGCGGCC	6	-	893	1878
ENSDARG00000006791	ENSDART00000067298	25	10	10	CTAAGCCCATCTTGGTGGGCGGC	5	-	894	1878
ENSDARG00000006791	ENSDART00000067298	25	10	10	GGCCACTAAACAGCTGAGGTTGCA	6	-	946	1878
ENSDARG00000006791	ENSDART00000067298	25	12	12	CTAATCTTCTCTCGCATCTGTAGCA	7	-	1196	1878
ENSDARG00000006791	ENSDART00000067298	25	15	15	AGCCACAGCTGGAGGGGGAGGAG	5	-	1554	1878
ENSDARG00000006791	ENSDART00000067298	25	15	15	AGCCACAGCTGGAGGGGGAGGAGCC	7	-	1552	1878
ENSDARG00000006791	ENSDART00000067298	25	16	16	CACTCATTAATGAATTATTTGAA	5	-	1713	1878
ENSDARG00000006791	ENSDART00000067298	25	17	17	TGCTTCATCATTACTGGGGCTGCT	6	-	1780	1878
ENSDARG00000006791	ENSDART00000067298	25	17	17	TGCTTCATCATTACTGGGGCTGC	5	-	1781	1878
ENSDARG00000006791	ENSDART00000104516	25	2	2	ACACCCTTAAAATCAAGTGTTTTAA	7	-	232	1644
ENSDARG00000006791	ENSDART00000104516	25	2	2	GTTGGCTTCTGTGTATGGGTTGGTG	7	-	177	1644
ENSDARG00000006791	ENSDART00000104516	25	2	2	GTTGGCTTCTGTGTATGGGTTGGT	6	-	178	1644
ENSDARG00000006791	ENSDART00000104516	25	6	6	GGCCACTAAACAGCTGAGGTTGCA	6	-	691	1644
ENSDARG00000006791	ENSDART00000104516	25	6	6	CTAAGCCCATCTTGGTGGGCGGCC	6	-	638	1644
ENSDARG00000006791	ENSDART00000104516	25	6	6	CTAAGCCCATCTTGGTGGGCGGC	5	-	639	1644
ENSDARG00000006791	ENSDART00000104516	25	8	8	CTAATCTTCTCTCGCATCTGTAGCA	7	-	941	1644
ENSDARG00000006791	ENSDART00000104516	25	11	11	AGCCACAGCTGGAGGGGGAGGAGCC	7	-	1279	1644
ENSDARG00000006791	ENSDART00000104516	25	11	11	AGCCACAGCTGGAGGGGGAGGAG	5	-	1281	1644
ENSDARG00000006791	ENSDART00000104516	25	12	12	CACTCATTAATGAATTATTTGAA	5	-	1440	1644
ENSDARG00000006791	ENSDART00000104516	25	14	14	TGCTTCATCATTACTGGGGCTGCT	6	-	1546	1644
ENSDARG00000006791	ENSDART00000104516	25	14	14	TGCTTCATCATTACTGGGGCTGC	5	-	1547	1644
ENSDARG00000006791	ENSDART00000104523	25	3	1	CCCTTCCTCTTGCGGTTGTAGTC	5	-	109	1878
ENSDARG00000006791	ENSDART00000104523	25	8	6	GTTGGCTTCTGTGTATGGGTTGGTG	7	-	405	1878
ENSDARG00000006791	ENSDART00000104523	25	8	6	GTTGGCTTCTGTGTATGGGTTGGT	6	-	406	1878
ENSDARG00000006791	ENSDART00000104523	25	8	6	ACACCCTTAAAATCAAGTGTTTTAA	7	-	460	1878
ENSDARG00000006791	ENSDART00000104523	25	12	10	CTAAGCCCATCTTGGTGGGCGGC	5	-	894	1878
ENSDARG00000006791	ENSDART00000104523	25	12	10	CTAAGCCCATCTTGGTGGGCGGCC	6	-	893	1878
ENSDARG00000006791	ENSDART00000104523	25	12	10	GGCCACTAAACAGCTGAGGTTGCA	6	-	946	1878
ENSDARG00000006791	ENSDART00000104523	25	14	12	CTAATCTTCTCTCGCATCTGTAGCA	7	-	1196	1878
ENSDARG00000006791	ENSDART00000104523	25	17	15	AGCCACAGCTGGAGGGGGAGGAGCC	7	-	1552	1878
ENSDARG00000006791	ENSDART00000104523	25	17	15	AGCCACAGCTGGAGGGGGAGGAG	5	-	1554	1878
ENSDARG00000006791	ENSDART00000104523	25	18	16	CACTCATTAATGAATTATTTGAA	5	-	1713	1878
ENSDARG00000006791	ENSDART00000104523	25	19	17	TGCTTCATCATTACTGGGGCTGCT	6	-	1780	1878
ENSDARG00000006791	ENSDART00000104523	25	19	17	TGCTTCATCATTACTGGGGCTGC	5	-	1781	1878
ENSDARG00000006899	ENSDART00000008173	25	2	1	ACAAGCACATACGCGGCTTTGAC	5	-	118	1392
ENSDARG00000006899	ENSDART00000008173	25	3	2	GGCTCATTAAAGCGGATGGTGGC	5	-	346	1392
ENSDARG00000006899	ENSDART00000008173	25	7	6	GTCAGCGACGGCGTTATTTGAAGCC	7	-	807	1392
ENSDARG00000006899	ENSDART00000008173	25	10	9	TCCAGCACCATCATGGCCTTGTGC	6	-	1170	1392
ENSDARG00000006899	ENSDART00000008173	25	10	9	AGCACCATCATGGCCTTGTGCAGTC	7	-	1166	1392
ENSDARG00000006899	ENSDART00000104034	25	1	1	ACAAGCACATACGCGGCTTTGAC	5	-	118	1554
ENSDARG00000006899	ENSDART00000104034	25	2	2	GGCTCATTAAAGCGGATGGTGGC	5	-	346	1554
ENSDARG00000006899	ENSDART00000104034	25	6	6	GTCAGCGACGGCGTTATTTGAAGCC	7	-	807	1554
ENSDARG00000006899	ENSDART00000104034	25	9	9	TCCAGCACCATCATGGCCTTGTGC	6	-	1170	1554
ENSDARG00000006899	ENSDART00000104034	25	9	9	AGCACCATCATGGCCTTGTGCAGTC	7	-	1166	1554
ENSDARG00000006899	ENSDART00000104034	25	11	11	GCCATCTGCGAGCGGGCGATGAA	5	-	1462	1554
ENSDARG00000006921	ENSDART00000021006	25	2	2	AGACAAACCGCATCGAAGTGGCC	5	+	323	4767
ENSDARG00000006921	ENSDART00000021006	25	2	2	CTAAACCCCTCTCATAGGTGAGTCT	7	+	412	4767
ENSDARG00000006921	ENSDART00000021006	25	2	2	AAACCCCTCTCATAGGTGAGTCT	5	+	414	4767
ENSDARG00000006921	ENSDART00000021006	25	3	3	ATCCACAGAGCCAACTTAGACGGA	6	+	595	4767
ENSDARG00000006921	ENSDART00000021006	25	8	8	GCCACCAAAGTCATGGAAGCTGAA	6	+	1717	4767
ENSDARG00000006921	ENSDART00000021006	25	8	8	AACTCCACCCGAGAGGTGATTGT	5	+	1663	4767
ENSDARG00000006921	ENSDART00000021006	25	8	8	AACTGCCTCATATCTTTGGTTTT	5	+	1571	4767
ENSDARG00000006921	ENSDART00000021006	25	8	8	ACAAACTGCCTCATATCTTTGGTT	6	+	1568	4767
ENSDARG00000006921	ENSDART00000021006	25	8	8	CAACTCCACCCGAGAGGTGATTGT	6	+	1662	4767
ENSDARG00000006921	ENSDART00000021006	25	8	8	AGCAGCTGCCAGACCTTATGGGCC	6	+	1688	4767
ENSDARG00000006921	ENSDART00000021006	25	8	8	ACCAAAGTCATGGAAGCTGAAGGT	6	+	1720	4767
ENSDARG00000006921	ENSDART00000021006	25	9	9	AGCTGCGCCTGTCCCATGGGCCTTG	7	+	1810	4767
ENSDARG00000006921	ENSDART00000021006	25	9	9	CTCGACTTCGATGTTTTAGAGAAC	6	+	1978	4767
ENSDARG00000006921	ENSDART00000021006	25	9	9	TCCATCGGCCGCAGGGTCTGAGCT	6	+	1790	4767
ENSDARG00000006921	ENSDART00000021006	25	10	10	GCACCAACCGCATCGAAGTGGCC	5	+	2153	4767
ENSDARG00000006921	ENSDART00000021006	25	10	10	GGCACCAACCGCATCGAAGTGGCC	6	+	2152	4767
ENSDARG00000006921	ENSDART00000021006	25	12	12	CACTCCTCCAGACAGGACGGTGCC	6	+	2626	4767
ENSDARG00000006921	ENSDART00000021006	25	14	14	AACAGCGACCACCCGAAGCAGCC	5	+	2986	4767
ENSDARG00000006921	ENSDART00000021006	25	15	15	TTCTGCTAAAATTGAAGGTGCCTCT	7	+	3198	4767
ENSDARG00000006921	ENSDART00000021006	25	16	16	AACATCCTCCAGCCAGTGGGTTTG	6	+	3388	4767
ENSDARG00000006921	ENSDART00000021006	25	16	16	ACATCCTCCAGCCAGTGGGTTTGAC	7	+	3389	4767
ENSDARG00000006921	ENSDART00000021006	25	16	16	ACATCCTCCAGCCAGTGGGTTTG	5	+	3389	4767
ENSDARG00000006921	ENSDART00000021006	25	17	17	AAAACCTGCTCAGCTGCGGAGGT	5	+	3674	4767
ENSDARG00000006921	ENSDART00000021006	25	17	17	AAAACCTGCTCAGCTGCGGAGGTA	6	+	3674	4767
ENSDARG00000006921	ENSDART00000021006	25	17	17	TTCAAAACCTGCTCAGCTGCGGAG	6	+	3671	4767
ENSDARG00000006921	ENSDART00000021006	25	17	17	ATCTGCATCGCTAAAGGTGACGGG	6	+	3610	4767
ENSDARG00000006921	ENSDART00000021006	25	18	18	GACGGCATCGCTGAATGTGCAGAC	6	+	3772	4767
ENSDARG00000006921	ENSDART00000021006	25	18	18	GTATCCCCATGGCGTGGCGCTGTG	6	+	3749	4767
ENSDARG00000006921	ENSDART00000021006	25	19	19	TTCCCAGACTGCACTGATGAATCT	6	+	4003	4767
ENSDARG00000006921	ENSDART00000021006	25	20	20	ACCCACAAACTCGCAGCATGGTAA	6	+	4245	4767
ENSDARG00000006921	ENSDART00000021006	25	20	20	TACAAAGGCCCCAATGGAGGATTT	6	+	4171	4767
ENSDARG00000006921	ENSDART00000021006	25	20	20	TACAAAGGCCCCAATGGAGGATTTC	7	+	4171	4767
ENSDARG00000006921	ENSDART00000021006	25	20	20	ATCGGCATCATCCTCTCTGTCTTC	6	+	4099	4767
ENSDARG00000006921	ENSDART00000021006	25	21	21	TCCAGCACCAAAGGAGCATTTTAC	6	+	4390	4767
ENSDARG00000006921	ENSDART00000021006	25	23	23	AGCGACTACACCACCAGCCGCTGGA	7	+	4579	4767
ENSDARG00000006921	ENSDART00000021006	25	23	23	ACCCCCTGCAGCACAGACGTGTGC	6	+	4552	4767
ENSDARG00000006981	ENSDART00000008989	25	4	4	TTAGGCAACTCTGGAAGAAGCTGAT	7	+	351	1074
ENSDARG00000006981	ENSDART00000008989	25	5	5	AACATCAGATTTCGGAAGCAGCT	5	+	649	1074
ENSDARG00000006981	ENSDART00000008989	25	5	5	AGCTCAGACAACAGGAGGAGATGGC	7	+	581	1074
ENSDARG00000006981	ENSDART00000008989	25	7	7	AGAGTCCCATGGCCAGCTGCAGAA	6	+	948	1074
ENSDARG00000006981	ENSDART00000008989	25	8	8	AAAAGCTTCGATTTGCTGCTGGA	5	+	1043	1074
ENSDARG00000007045	ENSDART00000034714	25	1	1	GCCAGCAGAAACGGCAGATTTGGTA	7	-	112	2316
ENSDARG00000007045	ENSDART00000034714	25	1	1	AGAAACGGCAGATTTGGTAGCCGCA	7	-	106	2316
ENSDARG00000007045	ENSDART00000034714	25	1	1	GTAGCCGCAGGTGCAGGGGAAGAA	6	-	91	2316
ENSDARG00000007045	ENSDART00000034714	25	1	1	AACGGCAGATTTGGTAGCCGCAGGT	7	-	103	2316
ENSDARG00000007045	ENSDART00000034714	25	2	2	CGCTGCACCACACGGACGCTGGC	5	-	310	2316
ENSDARG00000007045	ENSDART00000034714	25	2	2	CTCTGCATCAGCAAGCCTTTGAG	5	-	359	2316
ENSDARG00000007045	ENSDART00000034714	25	5	5	CTCACCTGCATTTCTTCTTTTGTA	6	-	678	2316
ENSDARG00000007045	ENSDART00000034714	25	6	6	CTCCCCACATGTTGAGGTTAGTAA	6	-	763	2316
ENSDARG00000007045	ENSDART00000034714	25	6	6	GACTTCTCCCCACATGTTGAGGT	5	-	769	2316
ENSDARG00000007045	ENSDART00000034714	25	6	6	ACACACCGCTGAGTGGAATTGGAT	6	-	801	2316
ENSDARG00000007045	ENSDART00000034714	25	6	6	AAACACACCGCTGAGTGGAATTG	5	-	804	2316
ENSDARG00000007045	ENSDART00000034714	25	6	6	GACTTCTCCCCACATGTTGAGGTT	6	-	768	2316
ENSDARG00000007045	ENSDART00000034714	25	7	7	TTCCCATAATTCTGTAATGAGGG	5	-	847	2316
ENSDARG00000007045	ENSDART00000034714	25	8	8	CTATACTTATGGGTTCTGATGGT	5	-	1041	2316
ENSDARG00000007045	ENSDART00000034714	25	9	9	GCAGGCCGCTGGGGATGGGGTTGGG	7	-	1243	2316
ENSDARG00000007045	ENSDART00000034714	25	10	10	TGCAGCTGCGGTGGCCGTGTGGTTT	7	-	1677	2316
ENSDARG00000007045	ENSDART00000034714	25	10	10	TGCTGCTGCTGCTTGGCTGAGGA	5	-	1396	2316
ENSDARG00000007045	ENSDART00000034714	25	10	10	TGCTGCTGCTGCTTGGCTGAGGAG	6	-	1395	2316
ENSDARG00000007045	ENSDART00000034714	25	10	10	CCCCAAGACCGGTGCTGTGGTGCT	6	-	1736	2316
ENSDARG00000007045	ENSDART00000034714	25	10	10	GAATGCCCATCCAGGGGTGACGTG	6	-	1628	2316
ENSDARG00000007045	ENSDART00000034714	25	10	10	AGAGGCCTCTGTGCTGGAGATGAG	6	-	1571	2316
ENSDARG00000007045	ENSDART00000034714	25	10	10	AGCCAAAACCAAAGGCTGCCTGC	5	-	1374	2316
ENSDARG00000007045	ENSDART00000034714	25	10	10	ATCCCCCCAAGACCGGTGCTGTG	5	-	1741	2316
ENSDARG00000007045	ENSDART00000034714	25	10	10	CCCCCAAGACCGGTGCTGTGGTG	5	-	1738	2316
ENSDARG00000007045	ENSDART00000034714	25	10	10	CCCCCAAGACCGGTGCTGTGGTGCT	7	-	1736	2316
ENSDARG00000007045	ENSDART00000034714	25	10	10	GAATCCCCCCAAGACCGGTGCTGTG	7	-	1741	2316
ENSDARG00000007045	ENSDART00000034714	25	11	11	AACCGCACCTGTGATGATGGCGGG	6	-	1993	2316
ENSDARG00000007045	ENSDART00000104316	25	1	1	AGAAACGGCAGATTTGGTAGCCGCA	7	-	106	2085
ENSDARG00000007045	ENSDART00000104316	25	1	1	AACGGCAGATTTGGTAGCCGCAGGT	7	-	103	2085
ENSDARG00000007045	ENSDART00000104316	25	1	1	GCCAGCAGAAACGGCAGATTTGGTA	7	-	112	2085
ENSDARG00000007045	ENSDART00000104316	25	1	1	GTAGCCGCAGGTGCAGGGGAAGAA	6	-	91	2085
ENSDARG00000007045	ENSDART00000104316	25	2	2	CTCTGCATCAGCAAGCCTTTGAG	5	-	359	2085
ENSDARG00000007045	ENSDART00000104316	25	2	2	CGCTGCACCACACGGACGCTGGC	5	-	310	2085
ENSDARG00000007045	ENSDART00000104316	25	5	5	CTCACCTGCATTTCTTCTTTTGTA	6	-	678	2085
ENSDARG00000007045	ENSDART00000104316	25	6	6	GACTTCTCCCCACATGTTGAGGTT	6	-	768	2085
ENSDARG00000007045	ENSDART00000104316	25	6	6	GACTTCTCCCCACATGTTGAGGT	5	-	769	2085
ENSDARG00000007045	ENSDART00000104316	25	6	6	CTCCCCACATGTTGAGGTTAGTAA	6	-	763	2085
ENSDARG00000007045	ENSDART00000104316	25	6	6	AAACACACCGCTGAGTGGAATTG	5	-	804	2085
ENSDARG00000007045	ENSDART00000104316	25	6	6	ACACACCGCTGAGTGGAATTGGAT	6	-	801	2085
ENSDARG00000007045	ENSDART00000104316	25	8	8	CTATACTTATGGGTTCTGATGGT	5	-	840	2085
ENSDARG00000007045	ENSDART00000104316	25	9	9	GCAGGCCGCTGGGGATGGGGTTGGG	7	-	1042	2085
ENSDARG00000007045	ENSDART00000104316	25	10	10	ATCCCCCCAAGACCGGTGCTGTG	5	-	1540	2085
ENSDARG00000007045	ENSDART00000104316	25	10	10	TGCTGCTGCTGCTTGGCTGAGGAG	6	-	1194	2085
ENSDARG00000007045	ENSDART00000104316	25	10	10	TGCTGCTGCTGCTTGGCTGAGGA	5	-	1195	2085
ENSDARG00000007045	ENSDART00000104316	25	10	10	TGCAGCTGCGGTGGCCGTGTGGTTT	7	-	1476	2085
ENSDARG00000007045	ENSDART00000104316	25	10	10	CCCCCAAGACCGGTGCTGTGGTG	5	-	1537	2085
ENSDARG00000007045	ENSDART00000104316	25	10	10	CCCCCAAGACCGGTGCTGTGGTGCT	7	-	1535	2085
ENSDARG00000007045	ENSDART00000104316	25	10	10	CCCCAAGACCGGTGCTGTGGTGCT	6	-	1535	2085
ENSDARG00000007045	ENSDART00000104316	25	10	10	AGAGGCCTCTGTGCTGGAGATGAG	6	-	1370	2085
ENSDARG00000007045	ENSDART00000104316	25	10	10	GAATGCCCATCCAGGGGTGACGTG	6	-	1427	2085
ENSDARG00000007045	ENSDART00000104316	25	10	10	GAATCCCCCCAAGACCGGTGCTGTG	7	-	1540	2085
ENSDARG00000007045	ENSDART00000104316	25	10	10	AGCCAAAACCAAAGGCTGCCTGC	5	-	1173	2085
ENSDARG00000007045	ENSDART00000104316	25	11	11	AACCGCACCTGTGATGATGGCGGG	6	-	1792	2085
ENSDARG00000007053	ENSDART00000002373	25	2	2	CAACGCCGCATCTGGCAGCTTGT	5	+	148	1326
ENSDARG00000007053	ENSDART00000002373	25	2	2	TGCAACGCCGCATCTGGCAGCTTGT	7	+	146	1326
ENSDARG00000007053	ENSDART00000002373	25	3	3	GACCACACACAGGCGATGGTGAA	5	+	376	1326
ENSDARG00000007053	ENSDART00000002373	25	4	4	TGCAAATCCTGCTCCAGGAGATGAA	7	+	588	1326
ENSDARG00000007053	ENSDART00000002373	25	4	4	GTCCTACACTTTTGGTGCTTGGGGT	7	+	558	1326
ENSDARG00000007053	ENSDART00000002373	25	4	4	TGCTACAACACATACTCTGTCTGT	6	+	802	1326
ENSDARG00000007053	ENSDART00000002373	25	4	4	GTCCTACACTTTTGGTGCTTGGGG	6	+	558	1326
ENSDARG00000007053	ENSDART00000002373	25	4	4	AACCCCAGAGATCATTTGCTGTA	5	+	1246	1326
ENSDARG00000007053	ENSDART00000002373	25	4	4	GAATTCACATCAAGAAGATGCAGAC	7	+	1199	1326
ENSDARG00000007053	ENSDART00000002373	25	4	4	GAAAACAAATACTGGCTGGTGGT	5	+	610	1326
ENSDARG00000007053	ENSDART00000002373	25	4	4	AGCTACACAGACATGGATTTTGTC	6	+	925	1326
ENSDARG00000007053	ENSDART00000002373	25	4	4	AGCTACACAGACATGGATTTTGT	5	+	925	1326
ENSDARG00000007053	ENSDART00000002373	25	4	4	AACAAATACTGGCTGGTGGTTCT	5	+	613	1326
ENSDARG00000007053	ENSDART00000002373	25	4	4	AAATCCTGCTCCAGGAGATGAAAAC	7	+	591	1326
ENSDARG00000007053	ENSDART00000059312	25	2	2	TGCAACGCCGCATCTGGCAGCTTGT	7	+	146	1296
ENSDARG00000007053	ENSDART00000059312	25	2	2	CAACGCCGCATCTGGCAGCTTGT	5	+	148	1296
ENSDARG00000007053	ENSDART00000059312	25	3	3	GACCACACACAGGCGATGGTGAA	5	+	376	1296
ENSDARG00000007053	ENSDART00000059312	25	4	4	GTCCTACACTTTTGGTGCTTGGGG	6	+	558	1296
ENSDARG00000007053	ENSDART00000059312	25	4	4	AAATCCTGCTCCAGGAGATGAAAAC	7	+	591	1296
ENSDARG00000007053	ENSDART00000059312	25	4	4	AACAAATACTGGCTGGTGGTTCT	5	+	613	1296
ENSDARG00000007053	ENSDART00000059312	25	4	4	GAAAACAAATACTGGCTGGTGGT	5	+	610	1296
ENSDARG00000007053	ENSDART00000059312	25	4	4	TGCAAATCCTGCTCCAGGAGATGAA	7	+	588	1296
ENSDARG00000007053	ENSDART00000059312	25	4	4	GTCCTACACTTTTGGTGCTTGGGGT	7	+	558	1296
ENSDARG00000007053	ENSDART00000059312	25	5	5	TGCTACAACACATACTCTGTCTGT	6	+	772	1296
ENSDARG00000007053	ENSDART00000059312	25	5	5	AACCCCAGAGATCATTTGCTGTA	5	+	1216	1296
ENSDARG00000007053	ENSDART00000059312	25	5	5	GAATTCACATCAAGAAGATGCAGAC	7	+	1169	1296
ENSDARG00000007053	ENSDART00000059312	25	5	5	AGCTACACAGACATGGATTTTGTC	6	+	895	1296
ENSDARG00000007053	ENSDART00000059312	25	5	5	AGCTACACAGACATGGATTTTGT	5	+	895	1296
ENSDARG00000007215	ENSDART00000013643	25	2	2	AACCCAGTCGTGTAATCTGATGAT	6	-	184	795
ENSDARG00000007215	ENSDART00000013643	25	2	2	CACTTCCGCAAGCACAGGTGTGGAA	7	-	117	795
ENSDARG00000007215	ENSDART00000013643	25	2	2	GAAAACTCCACGCTCGGTGCAGAA	6	-	346	795
ENSDARG00000007215	ENSDART00000013643	25	3	3	CCCCTCAAAGCCTCAGGTGGCATGC	7	-	503	795
ENSDARG00000007215	ENSDART00000013643	25	4	4	TGCTTCACAGGATTTGGGGTCGTT	6	-	759	795
ENSDARG00000007215	ENSDART00000013643	25	4	4	AACTGCTTCACAGGATTTGGGGTC	6	-	762	795
ENSDARG00000007215	ENSDART00000065516	25	3	3	AACCCAGTCGTGTAATCTGATGAT	6	-	235	858
ENSDARG00000007215	ENSDART00000065516	25	3	3	CACTTCCGCAAGCACAGGTGTGGAA	7	-	168	858
ENSDARG00000007215	ENSDART00000065516	25	3	3	GAAAACTCCACGCTCGGTGCAGAA	6	-	397	858
ENSDARG00000007215	ENSDART00000065516	25	4	4	CCCCTCAAAGCCTCAGGTGGCATGC	7	-	542	858
ENSDARG00000007215	ENSDART00000065516	25	5	5	CTCCTCCTCGCTTCTTTAGTGTTT	6	-	708	858
ENSDARG00000007215	ENSDART00000067227	25	1	1	GAAGCCATCGAGTCACTCTGATGAT	7	-	83	2079
ENSDARG00000007215	ENSDART00000067227	25	2	2	CACAGCTAAGGAAAGGGCGCTTTG	6	-	209	2079
ENSDARG00000007215	ENSDART00000067227	25	2	2	AACACCGGCTCAAGGTCTGCATGT	6	-	324	2079
ENSDARG00000007215	ENSDART00000067227	25	3	3	GCATCCGTCATTTTCTTAGTATTG	6	-	942	2079
ENSDARG00000007215	ENSDART00000067227	25	8	8	AACCCAGTCGTGTAATCTGATGAT	6	-	1423	2079
ENSDARG00000007215	ENSDART00000067227	25	8	8	CACTTCCGCAAGCACAGGTGTGGAA	7	-	1356	2079
ENSDARG00000007215	ENSDART00000067227	25	8	8	GAAAACTCCACGCTCGGTGCAGAA	6	-	1585	2079
ENSDARG00000007215	ENSDART00000067227	25	9	9	CCCCTCAAAGCCTCAGGTGGCATGC	7	-	1742	2079
ENSDARG00000007215	ENSDART00000067227	25	10	10	TGCTTCACAGGATTTGGGGTCGTT	6	-	1998	2079
ENSDARG00000007215	ENSDART00000067227	25	10	10	AACTGCTTCACAGGATTTGGGGTC	6	-	2001	2079
ENSDARG00000007215	ENSDART00000067227	25	11	11	CTCCTCCTCGCTTCTTTAGTGTTT	6	-	2037	2079
ENSDARG00000007247	ENSDART00000044738	25	4	4	GACGCCACCTTTGGACTCTGCTGGC	7	+	598	1644
ENSDARG00000007247	ENSDART00000044738	25	4	4	AGCAGCGCAGGAGGCCGCAGCTGAC	7	+	396	1644
ENSDARG00000007247	ENSDART00000044738	25	4	4	GGCCGCAGCTGACCTGCAGTTGAT	6	+	408	1644
ENSDARG00000007247	ENSDART00000044738	25	4	4	ACCGACGCCATGTGGACGAGGTG	5	+	749	1644
ENSDARG00000007247	ENSDART00000044738	25	6	6	AGAAAAGACTCGACCGGGTGAGAAC	7	+	998	1644
ENSDARG00000007247	ENSDART00000044738	25	6	6	AGAAAAGACTCGACCGGGTGAGAA	6	+	998	1644
ENSDARG00000007247	ENSDART00000044738	25	7	7	AGACGCTTCTGCCCTCGCTGAATCT	7	+	1031	1644
ENSDARG00000007247	ENSDART00000044738	25	8	8	GTCAAAAACAGACCTGAGGTCGGT	6	+	1132	1644
ENSDARG00000007247	ENSDART00000104609	25	3	3	GGCCGCAGCTGACCTGCAGTTGAT	6	+	288	1512
ENSDARG00000007247	ENSDART00000104609	25	3	3	GACGCCACCTTTGGACTCTGCTGGC	7	+	478	1512
ENSDARG00000007247	ENSDART00000104609	25	3	3	AGCAGCGCAGGAGGCCGCAGCTGAC	7	+	276	1512
ENSDARG00000007247	ENSDART00000104609	25	3	3	ACCGACGCCATGTGGACGAGGTG	5	+	629	1512
ENSDARG00000007247	ENSDART00000104609	25	5	5	AGAAAAGACTCGACCGGGTGAGAAC	7	+	878	1512
ENSDARG00000007247	ENSDART00000104609	25	5	5	AGAAAAGACTCGACCGGGTGAGAA	6	+	878	1512
ENSDARG00000007247	ENSDART00000104609	25	6	6	AGACGCTTCTGCCCTCGCTGAATCT	7	+	911	1512
ENSDARG00000007247	ENSDART00000104609	25	7	7	GTCAAAAACAGACCTGAGGTCGGT	6	+	1012	1512
ENSDARG00000007247	ENSDART00000104611	25	4	4	AGCAGCGCAGGAGGCCGCAGCTGAC	7	+	330	1578
ENSDARG00000007247	ENSDART00000104611	25	4	4	GGCCGCAGCTGACCTGCAGTTGAT	6	+	342	1578
ENSDARG00000007247	ENSDART00000104611	25	4	4	ACCGACGCCATGTGGACGAGGTG	5	+	683	1578
ENSDARG00000007247	ENSDART00000104611	25	4	4	GACGCCACCTTTGGACTCTGCTGGC	7	+	532	1578
ENSDARG00000007247	ENSDART00000104611	25	6	6	AGAAAAGACTCGACCGGGTGAGAAC	7	+	932	1578
ENSDARG00000007247	ENSDART00000104611	25	6	6	AGAAAAGACTCGACCGGGTGAGAA	6	+	932	1578
ENSDARG00000007247	ENSDART00000104611	25	7	7	AGACGCTTCTGCCCTCGCTGAATCT	7	+	965	1578
ENSDARG00000007247	ENSDART00000104611	25	8	8	GTCAAAAACAGACCTGAGGTCGGT	6	+	1066	1578
ENSDARG00000007302	ENSDART00000006512	25	2	2	GAACAAAACTGGATGAGGAGTTC	5	+	86	1158
ENSDARG00000007302	ENSDART00000006512	25	6	6	GTCGGCGTCTGGATTTTGATTAC	5	+	497	1158
ENSDARG00000007302	ENSDART00000006512	25	7	7	TGCAGCACCTCTCAGGTCTTTTAG	6	+	644	1158
ENSDARG00000007302	ENSDART00000006512	25	8	8	AGCCCAAAAGGGAATTTGCATCT	5	+	758	1158
ENSDARG00000007354	ENSDART00000011389	25	3	3	TACCGCACACTTTGGAATTGGCG	5	-	237	1476
ENSDARG00000007354	ENSDART00000011389	25	4	4	AAAATCAGCTTCATTTTTGAGTTC	6	-	391	1476
ENSDARG00000007354	ENSDART00000011389	25	4	4	AAAATCAGCTTCATTTTTGAGTT	5	-	392	1476
ENSDARG00000007354	ENSDART00000011389	25	5	5	CACTTCCTCCGTCAGCGAAGAAGCC	7	-	451	1476
ENSDARG00000007354	ENSDART00000011389	25	7	7	GTAGGCCACTAACAAGTCTTTGCC	6	-	748	1476
ENSDARG00000007354	ENSDART00000011389	25	7	7	GGCCACTAACAAGTCTTTGCCTTT	6	-	745	1476
ENSDARG00000007354	ENSDART00000011389	25	8	8	TCCTCCTTCATGACGTATTTGTC	5	-	979	1476
ENSDARG00000007354	ENSDART00000011389	25	8	8	GAACTCCTCCTTCATGACGTATTT	6	-	982	1476
ENSDARG00000007354	ENSDART00000011389	25	8	8	AGACACATCATGGCTGAAGCGGTT	6	-	892	1476
ENSDARG00000007354	ENSDART00000011389	25	8	8	AACTCCTCCTTCATGACGTATTT	5	-	982	1476
ENSDARG00000007354	ENSDART00000011389	25	13	13	AACGACCACTGTGTTTGTGGCCTCT	7	-	1425	1476
ENSDARG00000007402	ENSDART00000025703	25	1	1	ACAGGCCGCAAACCACTCTGACAAC	7	-	37	1254
ENSDARG00000007402	ENSDART00000025703	25	1	1	GACAACATCCTGGCATGATGTATCT	7	-	66	1254
ENSDARG00000007402	ENSDART00000025703	25	2	2	TCCCCCTGCTTTTGTCGACTTTGAA	7	-	887	1254
ENSDARG00000007402	ENSDART00000025703	25	2	2	TCCTCCCCCTGCTTTTGTCGACTTT	7	-	890	1254
ENSDARG00000007402	ENSDART00000025703	25	2	2	TTCAAAAGAGGGTGTTTTATTTGAA	7	-	399	1254
ENSDARG00000007402	ENSDART00000025703	25	2	2	TTCCAAAGCTTCCATCTCTGCCTGC	7	-	597	1254
ENSDARG00000007402	ENSDART00000025703	25	2	2	TCCATCTCCTCCCCCTGCTTTTGTC	7	-	896	1254
ENSDARG00000007402	ENSDART00000025703	25	2	2	GTCTACAGCCACCAGCTGGGTCT	5	-	527	1254
ENSDARG00000007402	ENSDART00000025703	25	2	2	GACTACCTCTAAAGAGTCTTTTGAA	7	-	852	1254
ENSDARG00000007402	ENSDART00000025703	25	2	2	CTCCTCCCCCTGCTTTTGTCGAC	5	-	893	1254
ENSDARG00000007402	ENSDART00000025703	25	2	2	ATCTCCTCCCCCTGCTTTTGTCGAC	7	-	893	1254
ENSDARG00000007402	ENSDART00000025703	25	3	3	GTTCACAGAGGTCTGTGCGAGGCT	6	-	1073	1254
ENSDARG00000007614	ENSDART00000020806	25	1	1	AAATACGCCGGAATGGAGGATAC	5	+	22	1047
ENSDARG00000007614	ENSDART00000020806	25	1	1	AGCTACCGCCGGGCTGGGAGGAGAG	7	+	59	1047
ENSDARG00000007614	ENSDART00000020806	25	1	1	AGCTACCGCCGGGCTGGGAGGAG	5	+	59	1047
ENSDARG00000007614	ENSDART00000020806	25	3	3	GGCCAAATCTTCTATGTGGAGTG	5	+	220	1047
ENSDARG00000007614	ENSDART00000020806	25	3	3	CAAATCTTCTATGTGGAGTGAGTT	6	+	223	1047
ENSDARG00000007614	ENSDART00000020806	25	4	4	GAAGCCTAAACGCTACGACGGAAAC	7	+	306	1047
ENSDARG00000007614	ENSDART00000020806	25	4	4	GTCATCATCGTCACCGGAGCCAAC	6	+	376	1047
ENSDARG00000007614	ENSDART00000020806	25	4	4	CACATCAACAAGCGTAAGACGTA	5	+	241	1047
ENSDARG00000007614	ENSDART00000020806	25	4	4	AGCCTAAACGCTACGACGGAAAC	5	+	308	1047
ENSDARG00000007614	ENSDART00000020806	25	6	6	CAAAGCCACAAAACTGTGAGTAA	5	+	591	1047
ENSDARG00000007614	ENSDART00000020806	25	6	6	TTCAAAGCCACAAAACTGTGAGTAA	7	+	589	1047
ENSDARG00000007614	ENSDART00000020806	25	7	7	CTCGGCTCCGGCACGGGTCGTGGTG	7	+	747	1047
ENSDARG00000007614	ENSDART00000020806	25	7	7	GGCTCCGGCACGGGTCGTGGTGGTT	7	+	750	1047
ENSDARG00000007614	ENSDART00000020806	25	7	7	GGCCTCTGCATGTGCTGGTGTGTAA	7	+	605	1047
ENSDARG00000007614	ENSDART00000020806	25	7	7	GGCCACTTCCTCCTGGTGCAGCT	5	+	703	1047
ENSDARG00000007614	ENSDART00000020806	25	8	8	ACCTCCATCCACCGCAGCTGGTGGC	7	+	985	1047
ENSDARG00000007614	ENSDART00000020806	25	8	8	GTCCCCGCACGGCATCTGCTGCA	5	+	933	1047
ENSDARG00000007614	ENSDART00000020806	25	8	8	TTCACCTCCATCCACCGCAGCTGGT	7	+	982	1047
ENSDARG00000007711	ENSDART00000022506	25	3	3	GAAGCCAACGTGAAGCAGGCGGC	5	+	214	963
ENSDARG00000007711	ENSDART00000022506	25	3	3	AGAAACAGCTGAAGGAGGCGCAGGG	7	+	242	963
ENSDARG00000007711	ENSDART00000022506	25	4	4	ACCGCCAGCTCCACCCGCAGCTGCT	7	+	341	963
ENSDARG00000007711	ENSDART00000022506	25	4	4	GCCAGCTCCACCCGCAGCTGCTGTC	7	+	344	963
ENSDARG00000007711	ENSDART00000022506	25	7	7	CTATCCAGCAGAGCTCGAGTGAGTC	7	+	808	963
ENSDARG00000007711	ENSDART00000022506	25	9	9	TGCGGCTGCGGAGAGAGATGAGTGT	7	+	917	963
ENSDARG00000007711	ENSDART00000022506	25	9	9	TTCAGCAGATGTTCTGGGAAGTG	5	+	893	963
ENSDARG00000007755	ENSDART00000037044	25	2	2	CACTGCGACCCCATGCTGCTGTC	5	-	66	651
ENSDARG00000007755	ENSDART00000037044	25	3	3	AGACACAACACCCAGCTGATGAC	5	-	191	651
ENSDARG00000007755	ENSDART00000037044	25	3	3	GCATCCAGAGAGCTGGAGGCGGCG	6	-	240	651
ENSDARG00000007755	ENSDART00000037044	25	3	3	ACAGACACAACACCCAGCTGATGAC	7	-	191	651
ENSDARG00000007755	ENSDART00000037044	25	3	3	GCATCCAGAGAGCTGGAGGCGGC	5	-	241	651
ENSDARG00000007755	ENSDART00000037044	25	4	4	TTCCCAAGATGGCTGCCGGTGGC	5	-	370	651
ENSDARG00000007755	ENSDART00000037044	25	4	4	GAAAGCCACCGTCCAGGCGTCAAC	6	-	325	651
ENSDARG00000007755	ENSDART00000037044	25	4	4	ACCTTCCCAAGATGGCTGCCGGT	5	-	373	651
ENSDARG00000007755	ENSDART00000037044	25	4	4	AAAGCCACCGTCCAGGCGTCAAC	5	-	325	651
ENSDARG00000007755	ENSDART00000037044	25	5	5	TTCACCTTCCAGCGTGTGCAGGA	5	-	551	651
ENSDARG00000007755	ENSDART00000080340	25	3	3	CACTGCGACCCCATGCTGCTGTC	5	-	69	936
ENSDARG00000007755	ENSDART00000080340	25	4	4	ACAGACACAACACCCAGCTGATGAC	7	-	194	936
ENSDARG00000007755	ENSDART00000080340	25	4	4	GCATCCAGAGAGCTGGAGGCGGCG	6	-	243	936
ENSDARG00000007755	ENSDART00000080340	25	4	4	GCATCCAGAGAGCTGGAGGCGGC	5	-	244	936
ENSDARG00000007755	ENSDART00000080340	25	4	4	AGACACAACACCCAGCTGATGAC	5	-	194	936
ENSDARG00000007755	ENSDART00000080340	25	5	5	AAAGCCACCGTCCAGGCGTCAAC	5	-	328	936
ENSDARG00000007755	ENSDART00000080340	25	5	5	GAAAGCCACCGTCCAGGCGTCAAC	6	-	328	936
ENSDARG00000007755	ENSDART00000080340	25	5	5	ACCTTCCCAAGATGGCTGCCGGT	5	-	376	936
ENSDARG00000007755	ENSDART00000080340	25	5	5	TTCCCAAGATGGCTGCCGGTGGC	5	-	373	936
ENSDARG00000007755	ENSDART00000080340	25	6	6	TTCACCTTCCAGCGTGTGCAGGA	5	-	554	936
ENSDARG00000007788	ENSDART00000045863	25	2	1	TTCGACCCACGGAATGAGTTTTTG	6	-	15	1050
ENSDARG00000007788	ENSDART00000045863	25	2	1	TACTTCGACCCACGGAATGAGTT	5	-	19	1050
ENSDARG00000007788	ENSDART00000045863	25	4	3	GCAGACGACAGACAGGAGGATGGC	6	-	466	1050
ENSDARG00000007788	ENSDART00000045863	25	5	4	TACACCATCAGCAGGAAGGAGGT	5	-	659	1050
ENSDARG00000007788	ENSDART00000104353	25	2	1	TTCGACCCACGGAATGAGTTTTTG	6	-	15	3687
ENSDARG00000007788	ENSDART00000104353	25	2	1	TACTTCGACCCACGGAATGAGTT	5	-	19	3687
ENSDARG00000007788	ENSDART00000104353	25	4	3	GCAGACGACAGACAGGAGGATGGC	6	-	466	3687
ENSDARG00000007788	ENSDART00000104353	25	5	4	TACACCATCAGCAGGAAGGAGGT	5	-	659	3687
ENSDARG00000007788	ENSDART00000104353	25	8	7	ACAACCAACACAGTGACGCCGAT	5	-	1267	3687
ENSDARG00000007788	ENSDART00000104353	25	8	7	AGCACCACAAGAATGAGGACGGT	5	-	1153	3687
ENSDARG00000007788	ENSDART00000104353	25	10	9	GTTCCCAACTTGACGGGGCAGGC	5	-	1610	3687
ENSDARG00000007788	ENSDART00000104353	25	10	9	GCCACCCTCTTTTTCAGCAGACTAG	7	-	1587	3687
ENSDARG00000007788	ENSDART00000104353	25	11	10	CAATGCCCACCACACAGATGCAGGT	7	-	2026	3687
ENSDARG00000007788	ENSDART00000104353	25	12	11	GTCATCCCCGATATGGAGAATGC	5	-	2171	3687
ENSDARG00000007788	ENSDART00000104353	25	14	13	GCCAACATCAGCTTTTTTGAGCG	5	-	2414	3687
ENSDARG00000007788	ENSDART00000104353	25	14	13	AAAGCCAACATCAGCTTTTTTGAG	6	-	2416	3687
ENSDARG00000007788	ENSDART00000104353	25	14	13	CGCAAAGCCAACATCAGCTTTTTTG	7	-	2418	3687
ENSDARG00000007788	ENSDART00000104353	25	15	14	GTTGTCATCGGTGAGGATGATGT	5	-	2483	3687
ENSDARG00000007788	ENSDART00000104353	25	15	14	GTTGTCATCGGTGAGGATGATGTC	6	-	2482	3687
ENSDARG00000007788	ENSDART00000104353	25	16	15	ACCTGCAAACAGTAGTGTGAAGAT	6	-	2830	3687
ENSDARG00000007788	ENSDART00000104353	25	17	16	CCCAAATAAAATGCTGCAGAAGAT	6	-	3025	3687
ENSDARG00000007788	ENSDART00000104353	25	20	19	GTCCTCCTCAGGATCTGTGTCGTC	6	-	3502	3687
ENSDARG00000007788	ENSDART00000104355	25	2	1	TTCGACCCACGGAATGAGTTTTTG	6	-	15	3657
ENSDARG00000007788	ENSDART00000104355	25	2	1	TACTTCGACCCACGGAATGAGTT	5	-	19	3657
ENSDARG00000007788	ENSDART00000104355	25	4	3	GCAGACGACAGACAGGAGGATGGC	6	-	466	3657
ENSDARG00000007788	ENSDART00000104355	25	5	4	TACACCATCAGCAGGAAGGAGGT	5	-	659	3657
ENSDARG00000007788	ENSDART00000104355	25	9	8	AGCACCACAAGAATGAGGACGGT	5	-	1123	3657
ENSDARG00000007788	ENSDART00000104355	25	9	8	ACAACCAACACAGTGACGCCGAT	5	-	1237	3657
ENSDARG00000007788	ENSDART00000104355	25	11	10	GTTCCCAACTTGACGGGGCAGGC	5	-	1580	3657
ENSDARG00000007788	ENSDART00000104355	25	11	10	GCCACCCTCTTTTTCAGCAGACTAG	7	-	1557	3657
ENSDARG00000007788	ENSDART00000104355	25	12	11	CAATGCCCACCACACAGATGCAGGT	7	-	1996	3657
ENSDARG00000007788	ENSDART00000104355	25	13	12	GTCATCCCCGATATGGAGAATGC	5	-	2141	3657
ENSDARG00000007788	ENSDART00000104355	25	15	14	GCCAACATCAGCTTTTTTGAGCG	5	-	2384	3657
ENSDARG00000007788	ENSDART00000104355	25	15	14	AAAGCCAACATCAGCTTTTTTGAG	6	-	2386	3657
ENSDARG00000007788	ENSDART00000104355	25	15	14	CGCAAAGCCAACATCAGCTTTTTTG	7	-	2388	3657
ENSDARG00000007788	ENSDART00000104355	25	16	15	GTTGTCATCGGTGAGGATGATGT	5	-	2453	3657
ENSDARG00000007788	ENSDART00000104355	25	16	15	GTTGTCATCGGTGAGGATGATGTC	6	-	2452	3657
ENSDARG00000007788	ENSDART00000104355	25	17	16	ACCTGCAAACAGTAGTGTGAAGAT	6	-	2800	3657
ENSDARG00000007788	ENSDART00000104355	25	18	17	CCCAAATAAAATGCTGCAGAAGAT	6	-	2995	3657
ENSDARG00000007788	ENSDART00000104355	25	21	20	GTCCTCCTCAGGATCTGTGTCGTC	6	-	3472	3657
ENSDARG00000007950	ENSDART00000022861	25	1	1	TTCAGCAACACGAGGCCGATGGG	5	+	77	3489
ENSDARG00000007950	ENSDART00000022861	25	2	2	AACACCAGACAGGCGACGTCTAC	5	+	143	3489
ENSDARG00000007950	ENSDART00000022861	25	4	4	GTTTCAGGCGTGTGGGCCGCTGTG	6	+	300	3489
ENSDARG00000007950	ENSDART00000022861	25	6	6	ACAGTCGACGAGGTTGTGGCAGCA	6	+	610	3489
ENSDARG00000007950	ENSDART00000022861	25	8	8	AAAATCTTCAGTTTGGAGGGTAA	5	+	988	3489
ENSDARG00000007950	ENSDART00000022861	25	8	8	TTCTTCAGCGTCACAGACGAGTCT	6	+	931	3489
ENSDARG00000007950	ENSDART00000022861	25	9	9	ACAGGCACCAACCAGAATGGTAC	5	+	1003	3489
ENSDARG00000007950	ENSDART00000022861	25	12	12	ACAAACCCAATGTTGGGTTGATTT	6	+	1389	3489
ENSDARG00000007950	ENSDART00000022861	25	12	12	ACAAACCCAATGTTGGGTTGATTTC	7	+	1389	3489
ENSDARG00000007950	ENSDART00000022861	25	12	12	GACAAACCCAATGTTGGGTTGATTT	7	+	1388	3489
ENSDARG00000007950	ENSDART00000022861	25	12	12	GACAAACCCAATGTTGGGTTGAT	5	+	1388	3489
ENSDARG00000007950	ENSDART00000022861	25	15	15	GCAGCCTTAGTTGTATTTAGACTTG	7	+	1417	3489
ENSDARG00000007950	ENSDART00000022861	25	19	19	AACGTCACAGCGAGGACGCCGAT	5	+	1975	3489
ENSDARG00000007950	ENSDART00000022861	25	21	21	GCCTGCAGAGAGCAGATGAAGGA	5	+	2198	3489
ENSDARG00000007950	ENSDART00000022861	25	23	23	AAAGACCCCTGAGCGTTTGGTAG	5	+	2409	3489
ENSDARG00000007950	ENSDART00000022861	25	23	23	CACTTCTCCAGTCTGGTGGTGAA	5	+	2530	3489
ENSDARG00000007950	ENSDART00000022861	25	30	30	ATCTTCACACTTTATTAGCCGTG	5	+	3197	3489
ENSDARG00000007950	ENSDART00000022861	25	32	32	TTCTGCAGATTATCCTGGAGATTAG	7	+	3305	3489
ENSDARG00000007950	ENSDART00000022861	25	32	32	TGCAGCTTCTGGCCCTGCTGGTGCT	7	+	3389	3489
ENSDARG00000007950	ENSDART00000022861	25	32	32	ATCGGCAGCACTCTTGGAGGACTGC	7	+	3367	3489
ENSDARG00000007975	ENSDART00000029580	25	1	1	AACTTCCACCAGGAATGTGAGGCG	6	+	31	531
ENSDARG00000007975	ENSDART00000029580	25	1	1	CTCTACGCCTCATATGTGTATCT	5	+	82	531
ENSDARG00000007975	ENSDART00000029580	25	2	2	GTCTGCAGAACCAGAGAGGAGGAC	6	+	212	531
ENSDARG00000007975	ENSDART00000102809	25	1	1	CTCTACGCCTCATATGTGTATCT	5	+	82	531
ENSDARG00000007975	ENSDART00000102809	25	1	1	AACTTCCACCAGGAATGTGAGGCG	6	+	31	531
ENSDARG00000007975	ENSDART00000102809	25	2	2	GTCTGCAGAACCAGAGAGGAGGAC	6	+	212	531
ENSDARG00000008019	ENSDART00000010923	25	6	2	GACAACAGCAGATCGATGATGAC	5	+	233	954
ENSDARG00000008019	ENSDART00000010923	25	10	6	TTCTCCAGAATTTCAGAGGGAGAG	6	+	683	954
ENSDARG00000008019	ENSDART00000010923	25	10	6	TTCAGCAACTACCGAGTGTTTGAG	6	+	718	954
ENSDARG00000008019	ENSDART00000010923	25	10	6	AGCAACTACCGAGTGTTTGAGGTG	6	+	721	954
ENSDARG00000008019	ENSDART00000010923	25	10	6	AGCAACTACCGAGTGTTTGAGGT	5	+	721	954
ENSDARG00000008019	ENSDART00000010923	25	12	8	TCCAACTACAAACTGTTTGAAAC	5	+	877	954
ENSDARG00000008019	ENSDART00000104340	25	2	2	CTCCCAAGAGGAAATGGTGAGGA	5	+	223	1881
ENSDARG00000008019	ENSDART00000104340	25	2	2	CTCCCAAGAGGAAATGGTGAGGAA	6	+	223	1881
ENSDARG00000008019	ENSDART00000104340	25	6	6	GACAACAGCAGATCGATGATGAC	5	+	785	1881
ENSDARG00000008019	ENSDART00000104340	25	10	10	TTCTCCAGAATTTCAGAGGGAGAG	6	+	1235	1881
ENSDARG00000008019	ENSDART00000104340	25	10	10	TTCAGCAACTACCGAGTGTTTGAG	6	+	1270	1881
ENSDARG00000008019	ENSDART00000104340	25	10	10	AGCAACTACCGAGTGTTTGAGGTG	6	+	1273	1881
ENSDARG00000008019	ENSDART00000104340	25	10	10	AGCAACTACCGAGTGTTTGAGGT	5	+	1273	1881
ENSDARG00000008019	ENSDART00000104340	25	13	13	ACAGACGTCAGCAGAAGGCGTAGAG	7	+	1789	1881
ENSDARG00000008035	ENSDART00000008968	25	5	5	ACATTCCACTATTGACTTTGATTTC	7	+	594	681
ENSDARG00000008035	ENSDART00000008968	25	6	6	AACTACTACTTTGAGAAGAAGCG	5	+	643	681
ENSDARG00000008384	ENSDART00000050225	25	5	5	GTTGGCAGCAGAGCGCTGGCTGT	5	-	425	2034
ENSDARG00000008384	ENSDART00000050225	25	5	5	GGCAGCAGAGCGCTGGCTGTGGTG	6	-	421	2034
ENSDARG00000008384	ENSDART00000050225	25	7	7	CTACGCTGCTGTAGTCTGACTCT	5	-	642	2034
ENSDARG00000008384	ENSDART00000050225	25	8	8	GAAAGCAGCCAGATAGTCGCTGTT	6	-	724	2034
ENSDARG00000008384	ENSDART00000050225	25	8	8	GCAGCCAGATAGTCGCTGTTGGT	5	-	721	2034
ENSDARG00000008384	ENSDART00000050225	25	10	10	AAAGGCATCAGCAGATGAGTGAGGT	7	-	872	2034
ENSDARG00000008384	ENSDART00000050225	25	10	10	GCAGCCAAAGGCATCAGCAGATGAG	7	-	878	2034
ENSDARG00000008384	ENSDART00000050225	25	10	10	ATCAGCAGATGAGTGAGGTGTGC	5	-	868	2034
ENSDARG00000008384	ENSDART00000050225	25	11	11	CAATTCACCTATCACATGCGGTGCC	7	-	1018	2034
ENSDARG00000008384	ENSDART00000050225	25	12	12	AACTGCTCCAGTATGAAGACTGC	5	-	1068	2034
ENSDARG00000008384	ENSDART00000050225	25	13	13	TCCTGCGCCGTCTTCTTAGGATTG	6	-	1188	2034
ENSDARG00000008384	ENSDART00000050225	25	18	18	AGCCCAGTCTTTGCTGCAGTTTCT	6	-	1773	2034
ENSDARG00000008384	ENSDART00000050225	25	18	18	TCCGTCCTCTGGCCAGGCCTTGGAT	7	-	1828	2034
ENSDARG00000008384	ENSDART00000050225	25	19	19	TCCTGCAGCCTCTGTCTCTGCTTCT	7	-	1979	2034
ENSDARG00000008384	ENSDART00000050225	25	19	19	AACCCCAGCGTTCCTGCAGCCTCT	6	-	1991	2034
ENSDARG00000008384	ENSDART00000050225	25	19	19	CTCAACATCCTCAGGTTTTAGGGC	6	-	1948	2034
ENSDARG00000008384	ENSDART00000104830	25	5	5	GTTGGCAGCAGAGCGCTGGCTGT	5	-	419	2025
ENSDARG00000008384	ENSDART00000104830	25	5	5	GGCAGCAGAGCGCTGGCTGTGGTG	6	-	415	2025
ENSDARG00000008384	ENSDART00000104830	25	7	7	CTACGCTGCTGTAGTCTGACTCT	5	-	636	2025
ENSDARG00000008384	ENSDART00000104830	25	8	8	GCAGCCAGATAGTCGCTGTTGGT	5	-	715	2025
ENSDARG00000008384	ENSDART00000104830	25	8	8	GAAAGCAGCCAGATAGTCGCTGTT	6	-	718	2025
ENSDARG00000008384	ENSDART00000104830	25	10	10	ATCAGCAGATGAGTGAGGTGTGC	5	-	862	2025
ENSDARG00000008384	ENSDART00000104830	25	10	10	AAAGGCATCAGCAGATGAGTGAGGT	7	-	866	2025
ENSDARG00000008384	ENSDART00000104830	25	10	10	GCAGCCAAAGGCATCAGCAGATGAG	7	-	872	2025
ENSDARG00000008384	ENSDART00000104830	25	11	11	CAATTCACCTATCACATGCGGTGCC	7	-	1012	2025
ENSDARG00000008384	ENSDART00000104830	25	12	12	AACTGCTCCAGTATGAAGACTGC	5	-	1062	2025
ENSDARG00000008384	ENSDART00000104830	25	13	13	TCCTGCGCCGTCTTCTTAGGATTG	6	-	1182	2025
ENSDARG00000008384	ENSDART00000104830	25	18	18	AGCCCAGTCTTTGCTGCAGTTTCT	6	-	1767	2025
ENSDARG00000008384	ENSDART00000104830	25	18	18	TCCGTCCTCTGGCCAGGCCTTGGAT	7	-	1822	2025
ENSDARG00000008384	ENSDART00000104830	25	19	19	CTCAACATCCTCAGGTTTTAGGGC	6	-	1942	2025
ENSDARG00000008384	ENSDART00000104830	25	19	19	TCCTGCAGCCTCTGTCTCTGCTTCT	7	-	1973	2025
ENSDARG00000008384	ENSDART00000104830	25	19	19	AACCCCAGCGTTCCTGCAGCCTCT	6	-	1985	2025
ENSDARG00000008395	ENSDART00000012820	25	2	1	TGCTCCAGCACGCTGTATTTGCT	5	-	106	1095
ENSDARG00000008395	ENSDART00000012820	25	2	1	CCCTGCTCCAGCACGCTGTATTT	5	-	109	1095
ENSDARG00000008395	ENSDART00000012820	25	3	2	TCCTCATCCTCACTGTCGGCTGT	5	-	223	1095
ENSDARG00000008395	ENSDART00000012820	25	3	2	TCCGCCAGACGACGAGCGTGATTC	6	-	186	1095
ENSDARG00000008395	ENSDART00000012820	25	3	2	GTCTCCATCCGCCAGACGACGAG	5	-	194	1095
ENSDARG00000008395	ENSDART00000012820	25	3	2	CTCCTCATCCTCACTGTCGGCTGT	6	-	223	1095
ENSDARG00000008395	ENSDART00000012820	25	4	3	ACATCCACCAACCACTCTGACAAC	6	-	351	1095
ENSDARG00000008395	ENSDART00000012820	25	4	3	AACATCCACCAACCACTCTGACAAC	7	-	351	1095
ENSDARG00000008395	ENSDART00000012820	25	6	5	GTCCACGTCGCTGTAGATGCAGTC	6	-	562	1095
ENSDARG00000008785	ENSDART00000006709	25	3	3	AACCCAAGCTGAGCTGCTTTGAT	5	-	178	1521
ENSDARG00000008785	ENSDART00000006709	25	3	3	TTAAACCCAAGCTGAGCTGCTTTG	6	-	180	1521
ENSDARG00000008785	ENSDART00000006709	25	7	7	TTCTCCATCAGCAGTCTTTGCAGTC	7	-	492	1521
ENSDARG00000008785	ENSDART00000006709	25	9	9	TTAAACTTCAAGCCCTGCTTTTGGA	7	-	797	1521
ENSDARG00000008785	ENSDART00000006709	25	10	10	ACCAACAGACTCCAGGCCGAGGTT	6	-	964	1521
ENSDARG00000008785	ENSDART00000006709	25	11	11	CCCTCATCCTCTGCTTTATGAGCC	6	-	1089	1521
ENSDARG00000008785	ENSDART00000006709	25	11	11	ACCCTCATCCTCTGCTTTATGAGCC	7	-	1089	1521
ENSDARG00000008785	ENSDART00000006709	25	12	12	GCATTCGTCTTGGCTCTGCTGTT	5	-	1279	1521
ENSDARG00000009266	ENSDART00000048507	25	4	4	AAAGCCAAAGCAGGATGGGAATGT	6	-	215	1413
ENSDARG00000009266	ENSDART00000048507	25	4	4	TCCAAAAGCCAAAGCAGGATGGGAA	7	-	218	1413
ENSDARG00000009266	ENSDART00000048507	25	5	5	GCATTCACAGAAGACTTTGGCTGC	6	-	363	1413
ENSDARG00000009266	ENSDART00000048507	25	11	11	TACCTCAGCCAGTGTTGTGACGGA	6	-	1240	1413
ENSDARG00000009266	ENSDART00000048507	25	11	11	ACCTCAGCCAGTGTTGTGACGGA	5	-	1240	1413
ENSDARG00000009299	ENSDART00000024633	25	1	1	ACCGACACCTTGTCCTGCTGAAGCC	7	-	182	1887
ENSDARG00000009299	ENSDART00000024633	25	1	1	TCCGGCTCCCCGCTGCAGCAGGC	5	-	62	1887
ENSDARG00000009299	ENSDART00000024633	25	1	1	GCACCATGCACATGCGAGGCATTG	6	-	123	1887
ENSDARG00000009299	ENSDART00000024633	25	5	5	AACAAAGACACTACAATAATAGGAG	7	-	320	1887
ENSDARG00000009299	ENSDART00000024633	25	8	8	TACCTATAAGCGTCATCTGATGAC	6	-	810	1887
ENSDARG00000009299	ENSDART00000024633	25	9	9	GACTCACACGGTCCGGGGAGACTGC	7	-	1655	1887
ENSDARG00000009299	ENSDART00000024633	25	9	9	GACATCCTCGGTGTGTGCAGGTGCA	7	-	1191	1887
ENSDARG00000009299	ENSDART00000024633	25	9	9	TCCCCAACCTTTTCCCGCAGACGCA	7	-	1682	1887
ENSDARG00000009299	ENSDART00000024633	25	9	9	ATCAGCAGCACTGGAAGTGGGAGCA	7	-	1740	1887
ENSDARG00000009299	ENSDART00000024633	25	9	9	TTCAGCTAACCCAGGGCTGATGGA	6	-	1285	1887
ENSDARG00000009299	ENSDART00000103712	25	4	4	TACCTATAAGCGTCATCTGATGAC	6	-	528	1323
ENSDARG00000009299	ENSDART00000103712	25	6	6	GACATCCTCGGTGTGTGCAGGTGCA	7	-	879	1323
ENSDARG00000009299	ENSDART00000103712	25	9	9	TCCCCAACCTTTTCCCGCAGACGCA	7	-	1118	1323
ENSDARG00000009299	ENSDART00000103712	25	9	9	GACTCACACGGTCCGGGGAGACTGC	7	-	1091	1323
ENSDARG00000009299	ENSDART00000103712	25	9	9	ATCAGCAGCACTGGAAGTGGGAGCA	7	-	1176	1323
ENSDARG00000009299	ENSDART00000103718	25	1	1	ACCGACACCTTGTCCTGCTGAAGCC	7	-	182	1893
ENSDARG00000009299	ENSDART00000103718	25	1	1	TCCGGCTCCCCGCTGCAGCAGGC	5	-	62	1893
ENSDARG00000009299	ENSDART00000103718	25	1	1	GCACCATGCACATGCGAGGCATTG	6	-	123	1893
ENSDARG00000009299	ENSDART00000103718	25	8	8	TACCTATAAGCGTCATCTGATGAC	6	-	816	1893
ENSDARG00000009299	ENSDART00000103718	25	9	9	TTCAGCTAACCCAGGGCTGATGGA	6	-	1291	1893
ENSDARG00000009299	ENSDART00000103718	25	9	9	TCCCCAACCTTTTCCCGCAGACGCA	7	-	1688	1893
ENSDARG00000009299	ENSDART00000103718	25	9	9	GACTCACACGGTCCGGGGAGACTGC	7	-	1661	1893
ENSDARG00000009299	ENSDART00000103718	25	9	9	GACATCCTCGGTGTGTGCAGGTGCA	7	-	1197	1893
ENSDARG00000009299	ENSDART00000103718	25	9	9	ATCAGCAGCACTGGAAGTGGGAGCA	7	-	1746	1893
ENSDARG00000009351	ENSDART00000016591	25	1	1	CCCCAAAACGGAGCGGGAGAAGAG	6	-	169	615
ENSDARG00000009351	ENSDART00000016591	25	1	1	TCCCCAAAACGGAGCGGGAGAAGAG	7	-	169	615
ENSDARG00000009351	ENSDART00000016591	25	2	2	ACAGCCCGCTTTTCACGCCGTATAG	7	-	388	615
ENSDARG00000009563	ENSDART00000039375	25	2	2	GAATGCTGCTGCGTGTGGCGTCT	5	+	77	1605
ENSDARG00000009563	ENSDART00000039375	25	3	3	ACCACCACAGTGATCGCAGCGGTG	6	+	271	1605
ENSDARG00000009563	ENSDART00000039375	25	3	3	AACCCCAAACTCAAGGAGAATCT	5	+	331	1605
ENSDARG00000009563	ENSDART00000039375	25	3	3	GACCACCACAGTGATCGCAGCGGTG	7	+	270	1605
ENSDARG00000009563	ENSDART00000039375	25	4	4	AACAGCACCATGTCGGAGTATCT	5	+	508	1605
ENSDARG00000009563	ENSDART00000039375	25	4	4	ACCAACAGCACCATGTCGGAGTA	5	+	505	1605
ENSDARG00000009563	ENSDART00000039375	25	5	5	TTCTTCATCGCCTTTGGTATTTGTA	7	+	619	1605
ENSDARG00000009563	ENSDART00000039375	25	6	6	CCCTTCTCCTTCTTCATGGGCATCT	7	+	907	1605
ENSDARG00000009563	ENSDART00000039375	25	6	6	ATCTCCATCAAGGATCTGGAGGT	5	+	778	1605
ENSDARG00000009563	ENSDART00000039375	25	6	6	GGCATCGCCTGCCTGATCTGTGGGA	7	+	748	1605
ENSDARG00000009563	ENSDART00000039375	25	8	8	ACATCAGTCTGCTGGTGGCGGTGGA	7	+	1274	1605
ENSDARG00000009563	ENSDART00000039375	25	8	8	ACATCAGTCTGCTGGTGGCGGTG	5	+	1274	1605
ENSDARG00000009563	ENSDART00000039375	25	8	8	TGCTCATCCTGACGGCGGTGGGT	5	+	1238	1605
ENSDARG00000009563	ENSDART00000039375	25	8	8	TGCTCATCCTGACGGCGGTGGGTCT	7	+	1238	1605
ENSDARG00000009563	ENSDART00000039375	25	8	8	ACACTCGCCAGTGTGGGAGCCGCT	6	+	1183	1605
ENSDARG00000009563	ENSDART00000039375	25	9	9	TGCTCAAAATACAGGCTTAGTAGAT	7	+	1509	1605
ENSDARG00000009563	ENSDART00000039375	25	9	9	TGCTCAAAATACAGGCTTAGTAG	5	+	1509	1605
ENSDARG00000009563	ENSDART00000039375	25	9	9	CTCCAACCAGTGCGTCTTTGCTGCT	7	+	1488	1605
ENSDARG00000009563	ENSDART00000039375	25	9	9	AACTCCAACCAGTGCGTCTTTGCT	6	+	1486	1605
ENSDARG00000009563	ENSDART00000039375	25	9	9	AACAACTCCAACCAGTGCGTCTTT	6	+	1483	1605
ENSDARG00000009563	ENSDART00000039375	25	9	9	AAACAACTCCAACCAGTGCGTCTTT	7	+	1482	1605
ENSDARG00000009564	ENSDART00000067037	25	1	1	TACAACCACAGCACTGGTGAGAG	5	+	171	1080
ENSDARG00000009564	ENSDART00000067037	25	3	3	GTTCAATGCATCCAGATCTGAGGTG	7	+	273	1080
ENSDARG00000009564	ENSDART00000067037	25	5	5	CTCCAAGCATGACATTATTGGAG	5	+	525	1080
ENSDARG00000009564	ENSDART00000067037	25	6	6	AGCCAAAAACCTGAAGAAGATGGA	6	+	708	1080
ENSDARG00000009564	ENSDART00000067037	25	6	6	GAAGCCAAAAACCTGAAGAAGAT	5	+	706	1080
ENSDARG00000009564	ENSDART00000067037	25	6	6	GCCAAAAACCTGAAGAAGATGGA	5	+	709	1080
ENSDARG00000009564	ENSDART00000067037	25	7	7	CGCTCAATCCGTACTTTAATGAGTC	7	+	824	1080
ENSDARG00000009564	ENSDART00000067037	25	7	7	GAAAACATCAGTGAAGAAGCGGAC	6	+	801	1080
ENSDARG00000009564	ENSDART00000067037	25	8	8	ACCAGCTGCGCCACTGGGCCGAT	5	+	977	1080
ENSDARG00000009564	ENSDART00000103416	25	2	2	CTCCAAGCATGACATTATTGGAG	5	+	183	777
ENSDARG00000009564	ENSDART00000103416	25	3	3	GCCAAAAACCTGAAGAAGATGGA	5	+	367	777
ENSDARG00000009564	ENSDART00000103416	25	3	3	GAAGCCAAAAACCTGAAGAAGAT	5	+	364	777
ENSDARG00000009564	ENSDART00000103416	25	3	3	AGCCAAAAACCTGAAGAAGATGGA	6	+	366	777
ENSDARG00000009564	ENSDART00000103416	25	4	4	CGCTCAATCCGTACTTTAATGAGTC	7	+	482	777
ENSDARG00000009564	ENSDART00000103416	25	4	4	GAAAACATCAGTGAAGAAGCGGAC	6	+	459	777
ENSDARG00000009564	ENSDART00000103416	25	5	5	ACCAGCTGCGCCACTGGGCCGAT	5	+	635	777
ENSDARG00000009802	ENSDART00000024244	25	2	2	GCCACCACATAATATGCTGACTGT	6	-	116	588
ENSDARG00000009802	ENSDART00000024244	25	2	2	CGCCACCACATAATATGCTGACTGT	7	-	116	588
ENSDARG00000009802	ENSDART00000024244	25	3	3	CCCTTCATCGTGAGCGCCGTCTGC	6	-	231	588
ENSDARG00000009802	ENSDART00000024244	25	3	3	AGCGCCGTCTGCACTTTAGAGGCC	6	-	219	588
ENSDARG00000009802	ENSDART00000024244	25	4	4	TGCTGCTGCGGCGTGCTGAGGGT	5	-	415	588
ENSDARG00000009802	ENSDART00000024244	25	4	4	TGCTGCGGCGTGCTGAGGGTGGT	5	-	412	588
ENSDARG00000009802	ENSDART00000024244	25	4	4	TCCTCCTTCTCCTGTGCGCGTGC	5	-	541	588
ENSDARG00000009802	ENSDART00000024244	25	4	4	GTCATCCACCTGCTGCTGCGGCGTG	7	-	423	588
ENSDARG00000009802	ENSDART00000024244	25	4	4	GTCATCCACCTGCTGCTGCGGCG	5	-	425	588
ENSDARG00000009802	ENSDART00000024244	25	4	4	ACCTGCTGCTGCGGCGTGCTGAGGG	7	-	416	588
ENSDARG00000009852	ENSDART00000025590	25	1	1	TTCTGCTGCACAGAATTTTTGGTG	6	+	98	1533
ENSDARG00000009852	ENSDART00000025590	25	1	1	GTAAACATCGGCGCTGTGGTGCA	5	+	37	1533
ENSDARG00000009852	ENSDART00000025590	25	1	1	TGCTGCACAGAATTTTTGGTGTC	5	+	101	1533
ENSDARG00000009852	ENSDART00000025590	25	1	1	AACATCGGCGCTGTGGTGCAGGG	5	+	40	1533
ENSDARG00000009852	ENSDART00000025590	25	3	3	ACATACTTCACTAAAGGTGAGTGT	6	+	445	1533
ENSDARG00000009852	ENSDART00000025590	25	3	3	AGCAACATCGCAAAGTGGAAGAA	5	+	415	1533
ENSDARG00000009852	ENSDART00000025590	25	4	4	AGACGCCTCAGGACATGTGGATGT	6	+	546	1533
ENSDARG00000009852	ENSDART00000025590	25	4	4	AGACGCCTCAGGACATGTGGATGTG	7	+	546	1533
ENSDARG00000009852	ENSDART00000025590	25	4	4	GTCTCCAGAAGTCAGTAGAGGTG	5	+	476	1533
ENSDARG00000009852	ENSDART00000025590	25	5	5	AAATACCACCTGGCAGCGTGAGTC	6	+	736	1533
ENSDARG00000009852	ENSDART00000025590	25	5	5	TTCTTCAAACTGGACTTTGTGTAC	6	+	709	1533
ENSDARG00000009852	ENSDART00000025590	25	8	8	CTCTCAGGCTCGCGAGATGTAGAG	6	+	1021	1533
ENSDARG00000009852	ENSDART00000055885	25	1	1	TTCTGCTGCACAGAATTTTTGGTG	6	+	95	1200
ENSDARG00000009852	ENSDART00000055885	25	1	1	TGCTGCACAGAATTTTTGGTGTC	5	+	98	1200
ENSDARG00000009852	ENSDART00000055885	25	1	1	GTAAACATCGGCGCTGTGGTGCA	5	+	34	1200
ENSDARG00000009852	ENSDART00000055885	25	1	1	AACATCGGCGCTGTGGTGCAGGG	5	+	37	1200
ENSDARG00000009852	ENSDART00000055885	25	3	3	AGCAACATCGCAAAGTGGAAGAA	5	+	412	1200
ENSDARG00000009852	ENSDART00000055885	25	3	3	ACATACTTCACTAAAGGTGAGTGT	6	+	442	1200
ENSDARG00000009852	ENSDART00000055885	25	4	4	GTCTCCAGAAGTCAGTAGAGGTG	5	+	473	1200
ENSDARG00000009852	ENSDART00000055885	25	6	6	AAATACCACCTGGCAGCGTGAGTC	6	+	640	1200
ENSDARG00000009852	ENSDART00000055885	25	6	6	TTCTTCAAACTGGACTTTGTGTAC	6	+	613	1200
ENSDARG00000009852	ENSDART00000055885	25	9	9	CTCTCAGGCTCGCGAGATGTAGAG	6	+	925	1200
ENSDARG00000009852	ENSDART00000104814	25	1	1	GTAAACATCGGCGCTGTGGTGCA	5	+	34	1209
ENSDARG00000009852	ENSDART00000104814	25	1	1	AACATCGGCGCTGTGGTGCAGGG	5	+	37	1209
ENSDARG00000009852	ENSDART00000104814	25	1	1	TGCTGCACAGAATTTTTGGTGTC	5	+	98	1209
ENSDARG00000009852	ENSDART00000104814	25	1	1	TTCTGCTGCACAGAATTTTTGGTG	6	+	95	1209
ENSDARG00000009852	ENSDART00000104814	25	3	3	ACATACTTCACTAAAGGTGAGTGT	6	+	442	1209
ENSDARG00000009852	ENSDART00000104814	25	3	3	AGCAACATCGCAAAGTGGAAGAA	5	+	412	1209
ENSDARG00000009852	ENSDART00000104814	25	4	4	GTCTCCAGAAGTCAGTAGAGGTG	5	+	473	1209
ENSDARG00000009852	ENSDART00000104814	25	6	6	TTCTTCAAACTGGACTTTGTGTAC	6	+	616	1209
ENSDARG00000009852	ENSDART00000104814	25	6	6	AAATACCACCTGGCAGCGTGAGTC	6	+	643	1209
ENSDARG00000009852	ENSDART00000104814	25	9	9	CTCTCAGGCTCGCGAGATGTAGAG	6	+	928	1209
ENSDARG00000009941	ENSDART00000012923	25	1	1	CTCCACTTCCACCCATGCTGTTGGT	7	-	133	2835
ENSDARG00000009941	ENSDART00000012923	25	1	1	CACTTCCACCCATGCTGTTGGTGCG	7	-	130	2835
ENSDARG00000009941	ENSDART00000012923	25	1	1	CACCCATGCTGTTGGTGCGACGGT	6	-	125	2835
ENSDARG00000009941	ENSDART00000012923	25	1	1	GGCTCCAGAAGCTTTTGATGGAGCT	7	-	577	2835
ENSDARG00000009941	ENSDART00000012923	25	1	1	ACCTCAATCTCCTTCCGAAGGAGCT	7	-	524	2835
ENSDARG00000009941	ENSDART00000012923	25	2	2	AGCGCCTGCACTGTTGTCTGCAGAT	7	-	698	2835
ENSDARG00000009941	ENSDART00000012923	25	2	2	TGCATCTGCCAGGCGTCGTGTTC	5	-	983	2835
ENSDARG00000009941	ENSDART00000012923	25	2	2	CTCTGCATCTGCCAGGCGTCGTG	5	-	986	2835
ENSDARG00000009941	ENSDART00000012923	25	2	2	AGAGGCTCCCCGGGCGGCTGGAGAA	7	-	761	2835
ENSDARG00000009941	ENSDART00000012923	25	2	2	TTATCCCGCTGTTCTAGCAGGTTCT	7	-	1028	2835
ENSDARG00000009941	ENSDART00000012923	25	2	2	TGCAGCGCCTGCACTGTTGTCTGC	6	-	702	2835
ENSDARG00000009941	ENSDART00000012923	25	2	2	ATCTCCTCCAGCGTACGGCGGAGCA	7	-	836	2835
ENSDARG00000009941	ENSDART00000012923	25	3	3	GGCGTCCCCTCGAGGCGGCGGTGCA	7	-	1079	2835
ENSDARG00000009941	ENSDART00000012923	25	3	3	GGCGTCCCCTCGAGGCGGCGGTG	5	-	1081	2835
ENSDARG00000009941	ENSDART00000012923	25	6	6	ATCTGCTTACTCTTTTTGTTTAA	5	-	1516	2835
ENSDARG00000009941	ENSDART00000012923	25	7	7	CTCTCAGACTGCTCATCTGTTTCT	6	-	1676	2835
ENSDARG00000009941	ENSDART00000012923	25	9	9	AGACTCTTCAGTTTGGAGTCTTT	5	-	1978	2835
ENSDARG00000009941	ENSDART00000012923	25	10	10	CTCTCCAGCTCACTGATTTTTCT	5	-	2233	2835
ENSDARG00000009941	ENSDART00000012923	25	10	10	TTCTCATTCTCCATCTGACGCAGGA	7	-	2195	2835
ENSDARG00000009941	ENSDART00000012923	25	10	10	GTTCACTGCAGCACTGTGGGCCTAA	7	-	2058	2835
ENSDARG00000009941	ENSDART00000012923	25	11	11	CCCGGCGGCTCCTTGTGTTTGCC	5	-	2308	2835
ENSDARG00000009941	ENSDART00000012923	25	14	14	TCCAGCACCTCCTCCAGGTGTCGTC	7	-	2540	2835
ENSDARG00000009941	ENSDART00000012923	25	15	15	AGCCACTTCTTCCTGTGTTTTCT	5	-	2648	2835
ENSDARG00000009941	ENSDART00000012923	25	15	15	GTTTTCTTCTTTTTAGATGAAGAG	6	-	2631	2835
ENSDARG00000009941	ENSDART00000041169	25	1	1	CACTTCCACCCATGCTGTTGGTGCG	7	-	130	2898
ENSDARG00000009941	ENSDART00000041169	25	1	1	CTCCACTTCCACCCATGCTGTTGGT	7	-	133	2898
ENSDARG00000009941	ENSDART00000041169	25	1	1	GGCTCCAGAAGCTTTTGATGGAGCT	7	-	577	2898
ENSDARG00000009941	ENSDART00000041169	25	1	1	CACCCATGCTGTTGGTGCGACGGT	6	-	125	2898
ENSDARG00000009941	ENSDART00000041169	25	1	1	ACCTCAATCTCCTTCCGAAGGAGCT	7	-	524	2898
ENSDARG00000009941	ENSDART00000041169	25	2	2	TGCAGCGCCTGCACTGTTGTCTGC	6	-	702	2898
ENSDARG00000009941	ENSDART00000041169	25	2	2	CTCTGCATCTGCCAGGCGTCGTG	5	-	986	2898
ENSDARG00000009941	ENSDART00000041169	25	2	2	ATCTCCTCCAGCGTACGGCGGAGCA	7	-	836	2898
ENSDARG00000009941	ENSDART00000041169	25	2	2	AGCGCCTGCACTGTTGTCTGCAGAT	7	-	698	2898
ENSDARG00000009941	ENSDART00000041169	25	2	2	TGCATCTGCCAGGCGTCGTGTTC	5	-	983	2898
ENSDARG00000009941	ENSDART00000041169	25	2	2	AGAGGCTCCCCGGGCGGCTGGAGAA	7	-	761	2898
ENSDARG00000009941	ENSDART00000041169	25	2	2	TTATCCCGCTGTTCTAGCAGGTTCT	7	-	1028	2898
ENSDARG00000009941	ENSDART00000041169	25	3	3	GGCGTCCCCTCGAGGCGGCGGTGCA	7	-	1079	2898
ENSDARG00000009941	ENSDART00000041169	25	3	3	GGCGTCCCCTCGAGGCGGCGGTG	5	-	1081	2898
ENSDARG00000009941	ENSDART00000041169	25	6	6	ATCTGCTTACTCTTTTTGTTTAA	5	-	1516	2898
ENSDARG00000009941	ENSDART00000041169	25	7	7	CTCTCAGACTGCTCATCTGTTTCT	6	-	1676	2898
ENSDARG00000009941	ENSDART00000041169	25	9	9	AGACTCTTCAGTTTGGAGTCTTT	5	-	1978	2898
ENSDARG00000009941	ENSDART00000041169	25	10	10	CTCTCCAGCTCACTGATTTTTCT	5	-	2233	2898
ENSDARG00000009941	ENSDART00000041169	25	10	10	GTTCACTGCAGCACTGTGGGCCTAA	7	-	2058	2898
ENSDARG00000009941	ENSDART00000041169	25	10	10	TTCTCATTCTCCATCTGACGCAGGA	7	-	2195	2898
ENSDARG00000009941	ENSDART00000041169	25	11	11	CCCGGCGGCTCCTTGTGTTTGCC	5	-	2284	2898
ENSDARG00000009941	ENSDART00000041169	25	13	13	TCCAGCACCTCCTCCAGGTGTCGTC	7	-	2603	2898
ENSDARG00000009941	ENSDART00000041169	25	14	14	AGCCACTTCTTCCTGTGTTTTCT	5	-	2711	2898
ENSDARG00000009941	ENSDART00000041169	25	14	14	GTTTTCTTCTTTTTAGATGAAGAG	6	-	2694	2898
ENSDARG00000009941	ENSDART00000086693	25	1	1	GGCTCCAGAAGCTTTTGATGGAGCT	7	-	577	2835
ENSDARG00000009941	ENSDART00000086693	25	1	1	CTCCACTTCCACCCATGCTGTTGGT	7	-	133	2835
ENSDARG00000009941	ENSDART00000086693	25	1	1	CACTTCCACCCATGCTGTTGGTGCG	7	-	130	2835
ENSDARG00000009941	ENSDART00000086693	25	1	1	CACCCATGCTGTTGGTGCGACGGT	6	-	125	2835
ENSDARG00000009941	ENSDART00000086693	25	1	1	ACCTCAATCTCCTTCCGAAGGAGCT	7	-	524	2835
ENSDARG00000009941	ENSDART00000086693	25	4	4	AGCGCCTGCACTGTTGTCTGCAGAT	7	-	725	2835
ENSDARG00000009941	ENSDART00000086693	25	4	4	TTATCCCGCTGTTCTAGCAGGTTCT	7	-	1055	2835
ENSDARG00000009941	ENSDART00000086693	25	4	4	TGCATCTGCCAGGCGTCGTGTTC	5	-	1010	2835
ENSDARG00000009941	ENSDART00000086693	25	4	4	TGCAGCGCCTGCACTGTTGTCTGC	6	-	729	2835
ENSDARG00000009941	ENSDART00000086693	25	4	4	CTCTGCATCTGCCAGGCGTCGTG	5	-	1013	2835
ENSDARG00000009941	ENSDART00000086693	25	4	4	ATCTCCTCCAGCGTACGGCGGAGCA	7	-	863	2835
ENSDARG00000009941	ENSDART00000086693	25	4	4	AGAGGCTCCCCGGGCGGCTGGAGAA	7	-	788	2835
ENSDARG00000009941	ENSDART00000086693	25	5	5	GGCGTCCCCTCGAGGCGGCGGTG	5	-	1108	2835
ENSDARG00000009941	ENSDART00000086693	25	5	5	GGCGTCCCCTCGAGGCGGCGGTGCA	7	-	1106	2835
ENSDARG00000009941	ENSDART00000086693	25	8	8	ATCTGCTTACTCTTTTTGTTTAA	5	-	1543	2835
ENSDARG00000009941	ENSDART00000086693	25	9	9	CTCTCAGACTGCTCATCTGTTTCT	6	-	1703	2835
ENSDARG00000009941	ENSDART00000086693	25	11	11	AGACTCTTCAGTTTGGAGTCTTT	5	-	2005	2835
ENSDARG00000009941	ENSDART00000086693	25	14	14	GTTCACTGCAGCACTGTGGGCCTAA	7	-	2124	2835
ENSDARG00000009941	ENSDART00000086693	25	14	14	CTCTCCAGCTCACTGATTTTTCT	5	-	2299	2835
ENSDARG00000009941	ENSDART00000086693	25	14	14	TTCTCATTCTCCATCTGACGCAGGA	7	-	2261	2835
ENSDARG00000009941	ENSDART00000086693	25	19	19	TCCAGCACCTCCTCCAGGTGTCGTC	7	-	2618	2835
ENSDARG00000009941	ENSDART00000086693	25	20	20	GTTTTCTTCTTTTTAGATGAAGAG	6	-	2709	2835
ENSDARG00000009941	ENSDART00000086693	25	20	20	AGCCACTTCTTCCTGTGTTTTCT	5	-	2726	2835
ENSDARG00000009941	ENSDART00000086716	25	1	1	CACTTCCACCCATGCTGTTGGTGCG	7	-	130	2760
ENSDARG00000009941	ENSDART00000086716	25	1	1	CTCCACTTCCACCCATGCTGTTGGT	7	-	133	2760
ENSDARG00000009941	ENSDART00000086716	25	1	1	GGCTCCAGAAGCTTTTGATGGAGCT	7	-	577	2760
ENSDARG00000009941	ENSDART00000086716	25	1	1	ACCTCAATCTCCTTCCGAAGGAGCT	7	-	524	2760
ENSDARG00000009941	ENSDART00000086716	25	1	1	CACCCATGCTGTTGGTGCGACGGT	6	-	125	2760
ENSDARG00000009941	ENSDART00000086716	25	2	2	CTCTGCATCTGCCAGGCGTCGTG	5	-	986	2760
ENSDARG00000009941	ENSDART00000086716	25	2	2	TGCAGCGCCTGCACTGTTGTCTGC	6	-	702	2760
ENSDARG00000009941	ENSDART00000086716	25	2	2	ATCTCCTCCAGCGTACGGCGGAGCA	7	-	836	2760
ENSDARG00000009941	ENSDART00000086716	25	2	2	AGCGCCTGCACTGTTGTCTGCAGAT	7	-	698	2760
ENSDARG00000009941	ENSDART00000086716	25	2	2	TGCATCTGCCAGGCGTCGTGTTC	5	-	983	2760
ENSDARG00000009941	ENSDART00000086716	25	2	2	AGAGGCTCCCCGGGCGGCTGGAGAA	7	-	761	2760
ENSDARG00000009941	ENSDART00000086716	25	2	2	TTATCCCGCTGTTCTAGCAGGTTCT	7	-	1028	2760
ENSDARG00000009941	ENSDART00000086716	25	3	3	GGCGTCCCCTCGAGGCGGCGGTG	5	-	1081	2760
ENSDARG00000009941	ENSDART00000086716	25	3	3	GGCGTCCCCTCGAGGCGGCGGTGCA	7	-	1079	2760
ENSDARG00000009941	ENSDART00000086716	25	6	6	ATCTGCTTACTCTTTTTGTTTAA	5	-	1516	2760
ENSDARG00000009941	ENSDART00000086716	25	7	7	CTCTCAGACTGCTCATCTGTTTCT	6	-	1676	2760
ENSDARG00000009941	ENSDART00000086716	25	9	9	AGACTCTTCAGTTTGGAGTCTTT	5	-	1978	2760
ENSDARG00000009941	ENSDART00000086716	25	10	10	CTCTCCAGCTCACTGATTTTTCT	5	-	2233	2760
ENSDARG00000009941	ENSDART00000086716	25	10	10	GTTCACTGCAGCACTGTGGGCCTAA	7	-	2058	2760
ENSDARG00000009941	ENSDART00000086716	25	10	10	TTCTCATTCTCCATCTGACGCAGGA	7	-	2195	2760
ENSDARG00000009941	ENSDART00000086716	25	11	11	CCCGGCGGCTCCTTGTGTTTGCC	5	-	2308	2760
ENSDARG00000009941	ENSDART00000086716	25	13	13	TCCAGCACCTCCTCCAGGTGTCGTC	7	-	2543	2760
ENSDARG00000009941	ENSDART00000086716	25	14	14	AGCCACTTCTTCCTGTGTTTTCT	5	-	2651	2760
ENSDARG00000009941	ENSDART00000086716	25	14	14	GTTTTCTTCTTTTTAGATGAAGAG	6	-	2634	2760
ENSDARG00000009941	ENSDART00000104235	25	1	1	CACTTCCACCCATGCTGTTGGTGCG	7	-	130	3015
ENSDARG00000009941	ENSDART00000104235	25	1	1	GGCTCCAGAAGCTTTTGATGGAGCT	7	-	577	3015
ENSDARG00000009941	ENSDART00000104235	25	1	1	CTCCACTTCCACCCATGCTGTTGGT	7	-	133	3015
ENSDARG00000009941	ENSDART00000104235	25	1	1	ACCTCAATCTCCTTCCGAAGGAGCT	7	-	524	3015
ENSDARG00000009941	ENSDART00000104235	25	1	1	CACCCATGCTGTTGGTGCGACGGT	6	-	125	3015
ENSDARG00000009941	ENSDART00000104235	25	2	2	CTCTGCATCTGCCAGGCGTCGTG	5	-	986	3015
ENSDARG00000009941	ENSDART00000104235	25	2	2	TGCATCTGCCAGGCGTCGTGTTC	5	-	983	3015
ENSDARG00000009941	ENSDART00000104235	25	2	2	TTATCCCGCTGTTCTAGCAGGTTCT	7	-	1028	3015
ENSDARG00000009941	ENSDART00000104235	25	2	2	TGCAGCGCCTGCACTGTTGTCTGC	6	-	702	3015
ENSDARG00000009941	ENSDART00000104235	25	2	2	ATCTCCTCCAGCGTACGGCGGAGCA	7	-	836	3015
ENSDARG00000009941	ENSDART00000104235	25	2	2	AGAGGCTCCCCGGGCGGCTGGAGAA	7	-	761	3015
ENSDARG00000009941	ENSDART00000104235	25	2	2	AGCGCCTGCACTGTTGTCTGCAGAT	7	-	698	3015
ENSDARG00000009941	ENSDART00000104235	25	3	3	GGCGTCCCCTCGAGGCGGCGGTGCA	7	-	1079	3015
ENSDARG00000009941	ENSDART00000104235	25	3	3	GGCGTCCCCTCGAGGCGGCGGTG	5	-	1081	3015
ENSDARG00000009941	ENSDART00000104235	25	8	8	ATCTGCTTACTCTTTTTGTTTAA	5	-	1603	3015
ENSDARG00000009941	ENSDART00000104235	25	9	9	CTCTCAGACTGCTCATCTGTTTCT	6	-	1763	3015
ENSDARG00000009941	ENSDART00000104235	25	11	11	AGACTCTTCAGTTTGGAGTCTTT	5	-	2065	3015
ENSDARG00000009941	ENSDART00000104235	25	12	12	TTCTCATTCTCCATCTGACGCAGGA	7	-	2282	3015
ENSDARG00000009941	ENSDART00000104235	25	12	12	GTTCACTGCAGCACTGTGGGCCTAA	7	-	2145	3015
ENSDARG00000009941	ENSDART00000104235	25	12	12	CTCTCCAGCTCACTGATTTTTCT	5	-	2320	3015
ENSDARG00000009941	ENSDART00000104235	25	15	15	CCCGGCGGCTCCTTGTGTTTGCC	5	-	2419	3015
ENSDARG00000009941	ENSDART00000104235	25	17	17	TCCAGCACCTCCTCCAGGTGTCGTC	7	-	2738	3015
ENSDARG00000009941	ENSDART00000104235	25	18	18	GTTTTCTTCTTTTTAGATGAAGAG	6	-	2829	3015
ENSDARG00000009941	ENSDART00000104235	25	18	18	AGCCACTTCTTCCTGTGTTTTCT	5	-	2846	3015
ENSDARG00000009941	ENSDART00000104236	25	1	1	ACCTCAATCTCCTTCCGAAGGAGCT	7	-	524	3024
ENSDARG00000009941	ENSDART00000104236	25	1	1	CACCCATGCTGTTGGTGCGACGGT	6	-	125	3024
ENSDARG00000009941	ENSDART00000104236	25	1	1	CTCCACTTCCACCCATGCTGTTGGT	7	-	133	3024
ENSDARG00000009941	ENSDART00000104236	25	1	1	CACTTCCACCCATGCTGTTGGTGCG	7	-	130	3024
ENSDARG00000009941	ENSDART00000104236	25	1	1	GGCTCCAGAAGCTTTTGATGGAGCT	7	-	577	3024
ENSDARG00000009941	ENSDART00000104236	25	2	2	CTCTGCATCTGCCAGGCGTCGTG	5	-	986	3024
ENSDARG00000009941	ENSDART00000104236	25	2	2	TGCATCTGCCAGGCGTCGTGTTC	5	-	983	3024
ENSDARG00000009941	ENSDART00000104236	25	2	2	TTATCCCGCTGTTCTAGCAGGTTCT	7	-	1028	3024
ENSDARG00000009941	ENSDART00000104236	25	2	2	TGCAGCGCCTGCACTGTTGTCTGC	6	-	702	3024
ENSDARG00000009941	ENSDART00000104236	25	2	2	AGAGGCTCCCCGGGCGGCTGGAGAA	7	-	761	3024
ENSDARG00000009941	ENSDART00000104236	25	2	2	AGCGCCTGCACTGTTGTCTGCAGAT	7	-	698	3024
ENSDARG00000009941	ENSDART00000104236	25	2	2	ATCTCCTCCAGCGTACGGCGGAGCA	7	-	836	3024
ENSDARG00000009941	ENSDART00000104236	25	3	3	GGCGTCCCCTCGAGGCGGCGGTGCA	7	-	1079	3024
ENSDARG00000009941	ENSDART00000104236	25	3	3	GGCGTCCCCTCGAGGCGGCGGTG	5	-	1081	3024
ENSDARG00000009941	ENSDART00000104236	25	7	7	GAAATCTACAGATCCAGTTGCATCT	7	-	1341	3024
ENSDARG00000009941	ENSDART00000104236	25	11	11	ATCTGCTTACTCTTTTTGTTTAA	5	-	1603	3024
ENSDARG00000009941	ENSDART00000104236	25	12	12	CTCTCAGACTGCTCATCTGTTTCT	6	-	1763	3024
ENSDARG00000009941	ENSDART00000104236	25	14	14	AGACTCTTCAGTTTGGAGTCTTT	5	-	2065	3024
ENSDARG00000009941	ENSDART00000104236	25	15	15	CTCTCCAGCTCACTGATTTTTCT	5	-	2320	3024
ENSDARG00000009941	ENSDART00000104236	25	15	15	GTTCACTGCAGCACTGTGGGCCTAA	7	-	2145	3024
ENSDARG00000009941	ENSDART00000104236	25	15	15	TTCTCATTCTCCATCTGACGCAGGA	7	-	2282	3024
ENSDARG00000009941	ENSDART00000104236	25	17	17	CCCGGCGGCTCCTTGTGTTTGCC	5	-	2428	3024
ENSDARG00000009941	ENSDART00000104236	25	19	19	TCCAGCACCTCCTCCAGGTGTCGTC	7	-	2747	3024
ENSDARG00000009941	ENSDART00000104236	25	20	20	AGCCACTTCTTCCTGTGTTTTCT	5	-	2855	3024
ENSDARG00000009941	ENSDART00000104236	25	20	20	GTTTTCTTCTTTTTAGATGAAGAG	6	-	2838	3024
ENSDARG00000010146	ENSDART00000011397	25	2	2	GTTCTCAGAATCCATGCAGAATCT	6	+	82	1266
ENSDARG00000010146	ENSDART00000011397	25	2	2	ATCCAAGTCTTGAAGGAGCTGGA	5	+	115	1266
ENSDARG00000010146	ENSDART00000011397	25	4	4	TGCTGCTTATCATGATCTGGATAC	6	+	360	1266
ENSDARG00000010146	ENSDART00000011397	25	8	8	GACCTCAACAGAAACTTTGATGCT	6	+	772	1266
ENSDARG00000010146	ENSDART00000011397	25	8	8	CTCAACAGAAACTTTGATGCTGAA	6	+	775	1266
ENSDARG00000010146	ENSDART00000011397	25	8	8	ACCTCAACAGAAACTTTGATGCT	5	+	773	1266
ENSDARG00000010146	ENSDART00000011397	25	8	8	AACCCAAACTGCCCTGGTGTCGAC	6	+	751	1266
ENSDARG00000010183	ENSDART00000004689	25	1	1	GAACAAGGCCTCCAGGGGGCGCT	5	-	104	1785
ENSDARG00000010183	ENSDART00000004689	25	1	1	AGCAGCATCAGCAGGCAGAGGGA	5	-	131	1785
ENSDARG00000010183	ENSDART00000004689	25	1	1	CAAGGCCTCCAGGGGGCGCTGCT	5	-	101	1785
ENSDARG00000010183	ENSDART00000004689	25	1	1	ACATACTGCAGAGTGGAGGAGAC	5	-	70	1785
ENSDARG00000010183	ENSDART00000004689	25	4	4	AGAGTCAGAGAGTAGGGAGCTGCT	6	-	480	1785
ENSDARG00000010183	ENSDART00000004689	25	5	5	CACTACAGCAGAGGGCTGATGGG	5	-	668	1785
ENSDARG00000010183	ENSDART00000004689	25	5	5	TCCTGCCTCCACTACAGCAGAGGGC	7	-	675	1785
ENSDARG00000010183	ENSDART00000004689	25	5	5	TACAGCAGAGGGCTGATGGGTGT	5	-	665	1785
ENSDARG00000010183	ENSDART00000004689	25	6	6	CCCTTCCTCTGGGAACTCTGGATAC	7	-	756	1785
ENSDARG00000010183	ENSDART00000004689	25	7	7	GCCAAATCCATAGATGTTGAAGTA	6	-	937	1785
ENSDARG00000010183	ENSDART00000004689	25	7	7	AGCCAAATCCATAGATGTTGAAGTA	7	-	937	1785
ENSDARG00000010183	ENSDART00000004689	25	7	7	AGAGCCAAATCCATAGATGTTGAA	6	-	940	1785
ENSDARG00000010183	ENSDART00000004689	25	9	9	TACTTCTCCATCAGTGAAGATGAA	6	-	1132	1785
ENSDARG00000010183	ENSDART00000004689	25	10	10	GGCCAATCCTGTGATGAGGGCGGT	6	-	1243	1785
ENSDARG00000010183	ENSDART00000004689	25	10	10	ACCTTCACCAATCCCGAATGAGAA	6	-	1213	1785
ENSDARG00000010183	ENSDART00000004689	25	12	12	AGAGCCTCCTAAATTCTGCAGAG	5	-	1475	1785
ENSDARG00000010183	ENSDART00000004689	25	13	13	GCACTCTTCTCCGCTGCAGGGGTC	6	-	1769	1785
ENSDARG00000010183	ENSDART00000016619	25	2	2	AGCAGCATCAGCAGGCAGAGGGA	5	-	164	1815
ENSDARG00000010183	ENSDART00000016619	25	2	2	GAACAAGGCCTCCAGGGGACGCT	5	-	137	1815
ENSDARG00000010183	ENSDART00000016619	25	2	2	ACATACTGCAGAGTGGAGGAGAC	5	-	103	1815
ENSDARG00000010183	ENSDART00000016619	25	2	2	CAAGGCCTCCAGGGGACGCTGCT	5	-	134	1815
ENSDARG00000010183	ENSDART00000016619	25	4	4	AGAGTCAGAGAGTAGGGAGCTGCT	6	-	516	1815
ENSDARG00000010183	ENSDART00000016619	25	5	5	TACAGCAGAGGGCTGATGGGTGT	5	-	701	1815
ENSDARG00000010183	ENSDART00000016619	25	5	5	TCCTGCCTCCACTACAGCAGAGGGC	7	-	711	1815
ENSDARG00000010183	ENSDART00000016619	25	5	5	CACTACAGCAGAGGGCTGATGGG	5	-	704	1815
ENSDARG00000010183	ENSDART00000016619	25	6	6	CCCTTCCTCTGGGAACTCTGGATAC	7	-	792	1815
ENSDARG00000010183	ENSDART00000016619	25	7	7	AGCCAAATCCATAGATGTTGAAGTA	7	-	973	1815
ENSDARG00000010183	ENSDART00000016619	25	7	7	AGAGCCAAATCCATAGATGTTGAA	6	-	976	1815
ENSDARG00000010183	ENSDART00000016619	25	7	7	GCCAAATCCATAGATGTTGAAGTA	6	-	973	1815
ENSDARG00000010183	ENSDART00000016619	25	9	9	TACTTCTCCATCAGTGAAGATGAA	6	-	1168	1815
ENSDARG00000010183	ENSDART00000016619	25	10	10	GGCCAATCCTGTGATGAGGGCGGT	6	-	1279	1815
ENSDARG00000010183	ENSDART00000016619	25	10	10	ACCTTCACCAATCCCGAATGAGAA	6	-	1249	1815
ENSDARG00000010183	ENSDART00000016619	25	12	12	AGAGCCTCCTAAATTCTGCAGAG	5	-	1511	1815
ENSDARG00000010183	ENSDART00000016619	25	14	14	GCACTCTTCTCCGCTGCAGGGGTC	6	-	1799	1815
ENSDARG00000010183	ENSDART00000035894	25	2	2	CAAGGCCTCCAGGGGGCGCTGCT	5	-	137	2400
ENSDARG00000010183	ENSDART00000035894	25	2	2	GAACAAGGCCTCCAGGGGGCGCT	5	-	140	2400
ENSDARG00000010183	ENSDART00000035894	25	2	2	ACATACTGCAGAGTGGAGGAGAC	5	-	106	2400
ENSDARG00000010183	ENSDART00000035894	25	2	2	AGCAGCATCAGCAGGCAGAGGGA	5	-	167	2400
ENSDARG00000010183	ENSDART00000035894	25	5	5	TCCTGCCTCCACTACAGCAGAGGGC	7	-	711	2400
ENSDARG00000010183	ENSDART00000035894	25	5	5	TACAGCAGAGGGCTGATGGGTGT	5	-	701	2400
ENSDARG00000010183	ENSDART00000035894	25	5	5	CACTACAGCAGAGGGCTGATGGG	5	-	704	2400
ENSDARG00000010183	ENSDART00000035894	25	7	7	TCCAAATCCATAGATGTTGAAGTA	6	-	973	2400
ENSDARG00000010183	ENSDART00000035894	25	7	7	CTCTTCAACAGTAAGAGCAGAGTGT	7	-	932	2400
ENSDARG00000010183	ENSDART00000035894	25	9	9	TACTTCTCCATCAGTGAAGATGAA	6	-	1168	2400
ENSDARG00000010183	ENSDART00000035894	25	10	10	ACCTTCACCAATTCCGAATGAGAA	6	-	1249	2400
ENSDARG00000010183	ENSDART00000035894	25	10	10	GGCCAATCCTGTGATGAGGGCGGT	6	-	1279	2400
ENSDARG00000010183	ENSDART00000035894	25	12	12	AGAGCCTCCTAAACTCTGCAGAG	5	-	1511	2400
ENSDARG00000010183	ENSDART00000035894	25	13	13	GCACTCTTCTCCGCTGCAGGGGTC	6	-	1805	2400
ENSDARG00000010183	ENSDART00000035894	25	14	14	TTAAGCCTCAAAAAGGCGCATCT	5	-	1864	2400
ENSDARG00000010183	ENSDART00000035894	25	14	14	CAAAAAGGCGCATCTCTGTGGGT	5	-	1856	2400
ENSDARG00000010183	ENSDART00000035894	25	14	14	AAAGGCGCATCTCTGTGGGTCTCT	6	-	1852	2400
ENSDARG00000010183	ENSDART00000035894	25	14	14	CAAAAAGGCGCATCTCTGTGGGTCT	7	-	1854	2400
ENSDARG00000010183	ENSDART00000035894	25	15	15	GCAAAAAACGTGCACATTTTAGGTC	7	-	1897	2400
ENSDARG00000010183	ENSDART00000035894	25	20	20	GTTCCCAGCAGCCCGAGGCCTTC	5	-	2118	2400
ENSDARG00000010183	ENSDART00000035894	25	20	20	AAACACAGCAGCCAATGCGGCGTC	6	-	2143	2400
ENSDARG00000010270	ENSDART00000010325	25	1	1	GTCCGCCTCACGCGGGTCTGGTGAA	7	+	473	1287
ENSDARG00000010270	ENSDART00000010325	25	1	1	GTACAACGCGAACGAGCTGTTGAG	6	+	303	1287
ENSDARG00000010270	ENSDART00000010325	25	1	1	ATCTGCACCATTACATGAAGGAGAG	7	+	641	1287
ENSDARG00000010270	ENSDART00000010325	25	1	1	AGACCACCCTGATACTTTTGCGTAC	7	+	282	1287
ENSDARG00000010270	ENSDART00000010325	25	1	1	TTCCACGCCATGGGAGCCGCCGTC	6	+	421	1287
ENSDARG00000010270	ENSDART00000010325	25	1	1	TTCGGCTTCGACTGGAGGAAGCA	5	+	54	1287
ENSDARG00000010270	ENSDART00000010325	25	1	1	AAAAGCAAACAGGGGGCCGTTGCG	6	+	571	1287
ENSDARG00000010270	ENSDART00000010325	25	1	1	GTTCCACGCCATGGGAGCCGCCGTC	7	+	420	1287
ENSDARG00000010270	ENSDART00000010325	25	3	3	TACAAACCCTTCATTTGTGAATTC	6	+	991	1287
ENSDARG00000010270	ENSDART00000010325	25	3	3	AACCAATGCGGCAAAGCTTTTAAC	6	+	925	1287
ENSDARG00000010270	ENSDART00000010325	25	4	4	ACATGCGGCAAAGGTTTCTGCAGGA	7	+	1180	1287
ENSDARG00000010270	ENSDART00000010325	25	4	4	ACACGCACAACGACAAGAAGCCTTT	7	+	1145	1287
ENSDARG00000010279	ENSDART00000008018	25	1	1	GCCTGCGCAGCGGCAGCTGTGGCC	6	-	12	771
ENSDARG00000010279	ENSDART00000008018	25	6	6	AACGCCTGCCTCTGAGTTAGTGGTG	7	-	309	771
ENSDARG00000010279	ENSDART00000008018	25	7	7	ATCCCCACAGCCTGGATGACGGA	5	-	481	771
ENSDARG00000010279	ENSDART00000008018	25	7	7	GAATCCCCACAGCCTGGATGACGGA	7	-	481	771
ENSDARG00000010279	ENSDART00000008018	25	8	8	AACGACAGAGAGCGCCGCAGCGGCT	7	-	603	771
ENSDARG00000010279	ENSDART00000008018	25	9	9	AACTCCTGCTGTGCCTTCTGGAAAC	7	-	671	771
ENSDARG00000010279	ENSDART00000045216	25	4	4	GCCTGCGCAGCGGCAGCTGTGGCC	6	-	219	750
ENSDARG00000010279	ENSDART00000045216	25	7	7	AACGCCTGCCTCTGAGTTAGTGGTG	7	-	528	750
ENSDARG00000010279	ENSDART00000045216	25	9	9	GAATCCCCACAGCCTGGATGACGGA	7	-	696	750
ENSDARG00000010279	ENSDART00000045216	25	9	9	ATCCCCACAGCCTGGATGACGGA	5	-	696	750
ENSDARG00000010279	ENSDART00000053405	25	4	4	GCCTGCGCAGCGGCAGCTGTGGCC	6	-	219	978
ENSDARG00000010279	ENSDART00000053405	25	8	8	AACGCCTGCCTCTGAGTTAGTGGTG	7	-	513	978
ENSDARG00000010279	ENSDART00000053405	25	9	9	GAATCCCCACAGCCTGGATGACGGA	7	-	685	978
ENSDARG00000010279	ENSDART00000053405	25	9	9	ATCCCCACAGCCTGGATGACGGA	5	-	685	978
ENSDARG00000010279	ENSDART00000053405	25	10	10	AACGACAGAGAGCGCCGCAGCGGCT	7	-	807	978
ENSDARG00000010279	ENSDART00000053405	25	11	11	AACTCCTGCTGTGCCTTCTGGAAAC	7	-	875	978
ENSDARG00000010279	ENSDART00000102824	25	4	4	GCCTGCGCAGCGGCAGCTGTGGCC	6	-	219	981
ENSDARG00000010279	ENSDART00000102824	25	8	8	AACGCCTGCCTCTGAGTTAGTGGTG	7	-	522	981
ENSDARG00000010279	ENSDART00000102824	25	9	9	GAATCCCCACAGCCTGGATGACGGA	7	-	694	981
ENSDARG00000010279	ENSDART00000102824	25	9	9	ATCCCCACAGCCTGGATGACGGA	5	-	694	981
ENSDARG00000010279	ENSDART00000102824	25	10	10	AACGACAGAGAGCGCCGCAGCGGCT	7	-	816	981
ENSDARG00000010279	ENSDART00000102824	25	11	11	AACTCCTGCTGTGCCTTCTGGAAAC	7	-	884	981
ENSDARG00000010279	ENSDART00000102829	25	4	4	GCCTGCGCAGCGGCAGCTGTGGCC	6	-	219	993
ENSDARG00000010279	ENSDART00000102829	25	7	7	AACGCCTGCCTCTGAGTTAGTGGTG	7	-	528	993
ENSDARG00000010279	ENSDART00000102829	25	8	8	ATCCCCACAGCCTGGATGACGGA	5	-	700	993
ENSDARG00000010279	ENSDART00000102829	25	8	8	GAATCCCCACAGCCTGGATGACGGA	7	-	700	993
ENSDARG00000010279	ENSDART00000102829	25	9	9	AACGACAGAGAGCGCCGCAGCGGCT	7	-	822	993
ENSDARG00000010279	ENSDART00000102829	25	10	10	AACTCCTGCTGTGCCTTCTGGAAAC	7	-	890	993
ENSDARG00000010511	ENSDART00000015863	25	2	2	GGCTGCAGCGTACCGATGCCGTG	5	+	116	1779
ENSDARG00000010511	ENSDART00000015863	25	3	3	AGAATCTGCTGGACATGATGATTGC	7	+	152	1779
ENSDARG00000010511	ENSDART00000015863	25	4	4	GCCTTCACAGCAGCAGCTGCAGAA	6	+	450	1779
ENSDARG00000010511	ENSDART00000015863	25	4	4	CTCGCCAGACTGAGCTGAAGTCTCT	7	+	356	1779
ENSDARG00000010511	ENSDART00000015863	25	5	5	AGCGCCGTCATGCTGAGTTTGTG	5	+	512	1779
ENSDARG00000010511	ENSDART00000015863	25	11	11	CGCTTCAACAATCGAGGAGGAAAC	6	+	1132	1779
ENSDARG00000010511	ENSDART00000015863	25	11	11	GAAACCTGCTGAAGGAGGAGAAGCA	7	+	1151	1779
ENSDARG00000010511	ENSDART00000015863	25	12	12	GCATGCAGAAAGAGATGGAGAAGCA	7	+	1322	1779
ENSDARG00000010511	ENSDART00000015863	25	13	13	AACCCCAACTAAGAGGAGAATTG	5	+	1410	1779
ENSDARG00000010511	ENSDART00000015863	25	13	13	AGAACCCCAACTAAGAGGAGAATTG	7	+	1408	1779
ENSDARG00000010511	ENSDART00000015863	25	14	14	CTCTGCCTCCAGCATGTGTAGCT	5	+	1470	1779
ENSDARG00000010511	ENSDART00000015863	25	15	15	TCCTCCTACTCGGAGTTTGCAGTA	6	+	1702	1779
ENSDARG00000010511	ENSDART00000015863	25	15	15	GGCCTCCTCCTACTCGGAGTTTGCA	7	+	1698	1779
ENSDARG00000010511	ENSDART00000015863	25	15	15	GGCCTCCTCCTACTCGGAGTTTGC	6	+	1698	1779
ENSDARG00000010511	ENSDART00000015863	25	15	15	GCCTCCTCCTACTCGGAGTTTGCA	6	+	1699	1779
ENSDARG00000010511	ENSDART00000015863	25	15	15	GCCTCCTCCTACTCGGAGTTTGC	5	+	1699	1779
ENSDARG00000010511	ENSDART00000058349	25	2	2	GGCTGCAGCGTACCGATGCCGTG	5	+	116	1794
ENSDARG00000010511	ENSDART00000058349	25	3	3	AGAATCTGCTGGACATGATGATTGC	7	+	152	1794
ENSDARG00000010511	ENSDART00000058349	25	4	4	CTCGCCAGACTGAGCTGAAGTCTCT	7	+	356	1794
ENSDARG00000010511	ENSDART00000058349	25	4	4	GCCTTCACAGCAGCAGCTGCAGAA	6	+	450	1794
ENSDARG00000010511	ENSDART00000058349	25	5	5	AGCGCCGTCATGCTGAGTTTGTG	5	+	512	1794
ENSDARG00000010511	ENSDART00000058349	25	12	12	CGCTTCAACAATCGAGGAGGAAAC	6	+	1138	1794
ENSDARG00000010511	ENSDART00000058349	25	12	12	GAAACCTGCTGAAGGAGGAGAAGCA	7	+	1157	1794
ENSDARG00000010511	ENSDART00000058349	25	13	13	GCATGCAGAAAGAGATGGAGAAGCA	7	+	1328	1794
ENSDARG00000010511	ENSDART00000058349	25	14	14	AACCCCAACTAAGAGGAGAATTG	5	+	1416	1794
ENSDARG00000010511	ENSDART00000058349	25	14	14	AGAACCCCAACTAAGAGGAGAATTG	7	+	1414	1794
ENSDARG00000010511	ENSDART00000058349	25	15	15	CTCTGCCTCCAGCATGTGTAGCT	5	+	1476	1794
ENSDARG00000010511	ENSDART00000058349	25	16	16	GCCTCCTCCTACTCGGAGTTTGCA	6	+	1705	1794
ENSDARG00000010511	ENSDART00000058349	25	16	16	TCCTCCTACTCGGAGTTTGCAGTA	6	+	1708	1794
ENSDARG00000010511	ENSDART00000058349	25	16	16	GGCCTCCTCCTACTCGGAGTTTGCA	7	+	1704	1794
ENSDARG00000010511	ENSDART00000058349	25	16	16	GGCCTCCTCCTACTCGGAGTTTGC	6	+	1704	1794
ENSDARG00000010511	ENSDART00000058349	25	16	16	GCCTCCTCCTACTCGGAGTTTGC	5	+	1705	1794
ENSDARG00000010511	ENSDART00000104710	25	2	2	GGCTGCAGCGTACCGATGCCGTG	5	+	116	1785
ENSDARG00000010511	ENSDART00000104710	25	3	3	AGAATCTGCTGGACATGATGATTGC	7	+	152	1785
ENSDARG00000010511	ENSDART00000104710	25	4	4	CTCGCCAGACTGAGCTGAAGTCTCT	7	+	356	1785
ENSDARG00000010511	ENSDART00000104710	25	4	4	GCCTTCACAGCAGCAGCTGCAGAA	6	+	450	1785
ENSDARG00000010511	ENSDART00000104710	25	5	5	AGCGCCGTCATGCTGAGTTTGTG	5	+	512	1785
ENSDARG00000010511	ENSDART00000104710	25	11	11	CGCTTCAACAATCGAGGAGGAAAC	6	+	1138	1785
ENSDARG00000010511	ENSDART00000104710	25	11	11	GAAACCTGCTGAAGGAGGAGAAGCA	7	+	1157	1785
ENSDARG00000010511	ENSDART00000104710	25	12	12	GCATGCAGAAAGAGATGGAGAAGCA	7	+	1328	1785
ENSDARG00000010511	ENSDART00000104710	25	13	13	AACCCCAACTAAGAGGAGAATTG	5	+	1416	1785
ENSDARG00000010511	ENSDART00000104710	25	13	13	AGAACCCCAACTAAGAGGAGAATTG	7	+	1414	1785
ENSDARG00000010511	ENSDART00000104710	25	14	14	CTCTGCCTCCAGCATGTGTAGCT	5	+	1476	1785
ENSDARG00000010511	ENSDART00000104710	25	15	15	TCCTCCTACTCGGAGTTTGCAGTA	6	+	1708	1785
ENSDARG00000010511	ENSDART00000104710	25	15	15	GGCCTCCTCCTACTCGGAGTTTGCA	7	+	1704	1785
ENSDARG00000010511	ENSDART00000104710	25	15	15	GGCCTCCTCCTACTCGGAGTTTGC	6	+	1704	1785
ENSDARG00000010511	ENSDART00000104710	25	15	15	GCCTCCTCCTACTCGGAGTTTGCA	6	+	1705	1785
ENSDARG00000010511	ENSDART00000104710	25	15	15	GCCTCCTCCTACTCGGAGTTTGC	5	+	1705	1785
ENSDARG00000010587	ENSDART00000011713	25	1	1	AACAACAACAAACACAGCTGGAGCG	7	-	200	1404
ENSDARG00000010587	ENSDART00000011713	25	2	2	GGCAACAAAACAAGCGCGGACGGC	6	-	331	1404
ENSDARG00000010587	ENSDART00000011713	25	2	2	GACGGCAAAAGTGTCGCCTAGGTA	6	-	313	1404
ENSDARG00000010587	ENSDART00000011713	25	3	3	AGCTCAAAAAGACAGGAGTGTTT	5	-	379	1404
ENSDARG00000010587	ENSDART00000011713	25	5	5	CTCACCCACACTCCGTTTGCTGGG	6	-	562	1404
ENSDARG00000010587	ENSDART00000011713	25	7	7	TCCTCAATCATCTGCTGCAGACGCA	7	-	701	1404
ENSDARG00000010587	ENSDART00000011713	25	7	7	GCCATCTCCTCAATCATCTGCTGCA	7	-	707	1404
ENSDARG00000010587	ENSDART00000011713	25	7	7	CAAGCCTGCGGTTGGTGATTGAGGA	7	-	797	1404
ENSDARG00000010587	ENSDART00000011713	25	8	8	GCCATCCTCGTAGTCGATGTCTTT	6	-	1075	1404
ENSDARG00000010587	ENSDART00000011713	25	8	8	CTCCACGGCCTGTTTTTGTTGGC	5	-	1304	1404
ENSDARG00000010587	ENSDART00000011713	25	8	8	GGCCCAGCCATCCTCGTAGTCGAT	6	-	1081	1404
ENSDARG00000010587	ENSDART00000011713	25	8	8	GTTCGCTGCTGGGTGCGGATTTT	5	-	940	1404
ENSDARG00000010587	ENSDART00000011713	25	8	8	AGCCACTCCACGGCCTGTTTTTGTT	7	-	1307	1404
ENSDARG00000010587	ENSDART00000103805	25	1	1	AACAACAACAAACACAGCTGGAGCG	7	-	194	861
ENSDARG00000010587	ENSDART00000103805	25	4	4	GTTCGCTGCTGGGTGCGGATTTT	5	-	397	861
ENSDARG00000010587	ENSDART00000103805	25	4	4	GGCCCAGCCATCCTCGTAGTCGAT	6	-	538	861
ENSDARG00000010587	ENSDART00000103805	25	4	4	GCCATCCTCGTAGTCGATGTCTTT	6	-	532	861
ENSDARG00000010587	ENSDART00000103805	25	4	4	CTCCACGGCCTGTTTTTGTTGGC	5	-	761	861
ENSDARG00000010587	ENSDART00000103805	25	4	4	AGCCACTCCACGGCCTGTTTTTGTT	7	-	764	861
ENSDARG00000010587	ENSDART00000103806	25	1	1	AACAACAACAAACACAGCTGGAGCG	7	-	194	861
ENSDARG00000010587	ENSDART00000103806	25	4	4	GTTCGCTGCTGGGTGCGGATTTT	5	-	397	861
ENSDARG00000010587	ENSDART00000103806	25	4	4	GGCCCAGCCATCCTCGTAGTCGAT	6	-	538	861
ENSDARG00000010587	ENSDART00000103806	25	4	4	GCCATCCTCGTAGTCGATGTCTTT	6	-	532	861
ENSDARG00000010587	ENSDART00000103806	25	4	4	CTCCACGGCCTGTTTTTGTTGGC	5	-	761	861
ENSDARG00000010587	ENSDART00000103806	25	4	4	AGCCACTCCACGGCCTGTTTTTGTT	7	-	764	861
ENSDARG00000010587	ENSDART00000103807	25	1	1	AACAACAACAAACACAGCTGGAGCG	7	-	200	1422
ENSDARG00000010587	ENSDART00000103807	25	3	3	TTCTACAAATATATGCATAGGGT	5	-	360	1422
ENSDARG00000010587	ENSDART00000103807	25	8	8	CTCACCCACACTCCGTTTGCTGGG	6	-	580	1422
ENSDARG00000010587	ENSDART00000103807	25	10	10	CAAGCCTGCGGTTGGTGATTGAGGA	7	-	815	1422
ENSDARG00000010587	ENSDART00000103807	25	10	10	TCCTCAATCATCTGCTGCAGACGCA	7	-	719	1422
ENSDARG00000010587	ENSDART00000103807	25	10	10	GCCATCTCCTCAATCATCTGCTGCA	7	-	725	1422
ENSDARG00000010587	ENSDART00000103807	25	11	11	GTTCGCTGCTGGGTGCGGATTTT	5	-	958	1422
ENSDARG00000010587	ENSDART00000103807	25	11	11	GGCCCAGCCATCCTCGTAGTCGAT	6	-	1099	1422
ENSDARG00000010587	ENSDART00000103807	25	11	11	GCCATCCTCGTAGTCGATGTCTTT	6	-	1093	1422
ENSDARG00000010587	ENSDART00000103807	25	11	11	CTCCACGGCCTGTTTTTGTTGGC	5	-	1322	1422
ENSDARG00000010587	ENSDART00000103807	25	11	11	AGCCACTCCACGGCCTGTTTTTGTT	7	-	1325	1422
ENSDARG00000010657	ENSDART00000010170	25	1	1	TTCCCCGCAGGCTCTGCTGATGTC	6	-	118	768
ENSDARG00000010657	ENSDART00000010170	25	1	1	GTTCCCCGCAGGCTCTGCTGATGTC	7	-	118	768
ENSDARG00000010657	ENSDART00000010170	25	2	2	GACGGCGGCGAACAGCTGATGGC	5	-	275	768
ENSDARG00000010657	ENSDART00000010170	25	2	2	AACAGCAGCTCCATGGTGGGACTCT	7	-	197	768
ENSDARG00000010657	ENSDART00000010170	25	3	3	ACACACTGCAGACGCGGGAGCCGCT	7	-	360	768
ENSDARG00000010657	ENSDART00000010170	25	3	3	GTCCTCTACAGTTTGGGTGATTTC	6	-	397	768
ENSDARG00000010657	ENSDART00000010170	25	3	3	GTCCTCTACAGTTTGGGTGATTT	5	-	398	768
ENSDARG00000010657	ENSDART00000010170	25	3	3	GCCTGCAGACACACTGCAGACGCG	6	-	369	768
ENSDARG00000010657	ENSDART00000010170	25	3	3	GCAGACACACTGCAGACGCGGGA	5	-	366	768
ENSDARG00000010657	ENSDART00000010170	25	3	3	AGCTCCTGCTCCTGGACGGGTTT	5	-	472	768
ENSDARG00000010657	ENSDART00000010170	25	4	4	GCCCCCATCCGAAAGTGGCCTCT	5	-	608	768
ENSDARG00000010657	ENSDART00000010170	25	5	5	TTAAACTGCTTTCTGAGGTCTTC	5	-	733	768
ENSDARG00000010657	ENSDART00000104956	25	1	1	TTCCCCGCAGGCTCTGCTGATGTC	6	-	118	705
ENSDARG00000010657	ENSDART00000104956	25	1	1	GTTCCCCGCAGGCTCTGCTGATGTC	7	-	118	705
ENSDARG00000010657	ENSDART00000104956	25	2	2	AACAGCAGCTCCATGGTGGGACTCT	7	-	200	705
ENSDARG00000010657	ENSDART00000104956	25	2	2	GACGGCGGCGAACAGCTGATGGC	5	-	278	705
ENSDARG00000010657	ENSDART00000104956	25	4	4	AGCTCCTGCTCCTGGACGGGTTT	5	-	406	705
ENSDARG00000010657	ENSDART00000104956	25	5	5	GCCCCCATCCGAAAGTGGCCTCT	5	-	542	705
ENSDARG00000010657	ENSDART00000104956	25	6	6	TTAAACTGCTTTCTGAGGTCTTC	5	-	667	705
ENSDARG00000010844	ENSDART00000009126	25	3	2	ACCCTCACCTGTAGTGGTGAATGT	6	-	284	564
ENSDARG00000010844	ENSDART00000009126	25	4	3	TCCCCACCAGAACCATGGGGACGTC	7	-	331	564
ENSDARG00000010844	ENSDART00000009126	25	4	3	CCCACCAGAACCATGGGGACGTC	5	-	331	564
ENSDARG00000011869	ENSDART00000019767	25	3	3	GACAACAGCTCCAATGGTGAGTT	5	+	346	1269
ENSDARG00000011869	ENSDART00000019767	25	3	3	GACAACAGCTCCAATGGTGAGTTT	6	+	346	1269
ENSDARG00000011869	ENSDART00000019767	25	4	4	AGCGGCCACAGGTCAAGTGGTCGCC	7	+	486	1269
ENSDARG00000011869	ENSDART00000019767	25	4	4	TGCGACACAAAAGGCAGATGGGTCT	7	+	434	1269
ENSDARG00000011869	ENSDART00000019767	25	5	5	GAATCCTTCCGACCAGAATGGTAC	6	+	691	1269
ENSDARG00000012005	ENSDART00000046780	25	1	1	TACACCAAAGTACGGGTGGTGGAC	6	+	91	651
ENSDARG00000012005	ENSDART00000046780	25	1	1	TACACCAAAGTACGGGTGGTGGA	5	+	91	651
ENSDARG00000012005	ENSDART00000046780	25	1	1	GAAGCCGCCGACCGAGGAGAAGAA	6	+	48	651
ENSDARG00000012005	ENSDART00000046780	25	1	1	AGAAGCCGCCGACCGAGGAGAAGAA	7	+	47	651
ENSDARG00000012005	ENSDART00000046780	25	4	4	CACAGCACCGCAGTATGTGGATTT	6	+	315	651
ENSDARG00000012005	ENSDART00000046780	25	4	4	CACAGCACCGCAGTATGTGGATTTC	7	+	315	651
ENSDARG00000012005	ENSDART00000046780	25	5	5	ACCTTCGACTCTCTGGTGAAGAA	5	+	415	651
ENSDARG00000012005	ENSDART00000046780	25	5	5	AACACCTTCGACTCTCTGGTGAA	5	+	412	651
ENSDARG00000012005	ENSDART00000104275	25	1	1	AGAAGCCGCCGACCGAGGAGAAGAA	7	+	35	627
ENSDARG00000012005	ENSDART00000104275	25	1	1	TACACCAAAGTACGGGTGGTGGAC	6	+	79	627
ENSDARG00000012005	ENSDART00000104275	25	1	1	GAAGCCGCCGACCGAGGAGAAGAA	6	+	36	627
ENSDARG00000012005	ENSDART00000104275	25	1	1	TACACCAAAGTACGGGTGGTGGA	5	+	79	627
ENSDARG00000012005	ENSDART00000104275	25	4	4	CACAGCACCGCAGTATGTGGATTT	6	+	324	627
ENSDARG00000012005	ENSDART00000104275	25	4	4	CACAGCACCGCAGTATGTGGATTTC	7	+	324	627
ENSDARG00000012005	ENSDART00000104275	25	5	5	AACACCTTCGACTCTCTGGTGAA	5	+	421	627
ENSDARG00000012005	ENSDART00000104275	25	5	5	ACCTTCGACTCTCTGGTGAAGAA	5	+	424	627
ENSDARG00000012355	ENSDART00000025186	25	1	1	GACAACAGCTCCAATGGTGAGTTT	6	+	160	1383
ENSDARG00000012355	ENSDART00000025186	25	1	1	GACAACAGCTCCAATGGTGAGTT	5	+	160	1383
ENSDARG00000012355	ENSDART00000025186	25	2	2	TGCGACACAAAAGGCAGATGGGTCT	7	+	248	1383
ENSDARG00000012355	ENSDART00000025186	25	2	2	AGCGGCCACAGGTCAAGTGGTCGCC	7	+	300	1383
ENSDARG00000012355	ENSDART00000025186	25	3	3	GAATCCTTCCGACCAGAATGGTAC	6	+	505	1383
ENSDARG00000012355	ENSDART00000025186	25	8	8	TGCCAAGCAGAAAGGATTGAGTA	5	+	1218	1383
ENSDARG00000012355	ENSDART00000025186	25	8	8	TTACAACTCTAACCGTTGTCTAA	5	+	1149	1383
ENSDARG00000012603	ENSDART00000020082	25	6	6	AGCAAAAGAGGCATTTGGTGAGTGC	7	+	387	762
ENSDARG00000012603	ENSDART00000020082	25	6	6	AGCAAAAGAGGCATTTGGTGAGTG	6	+	387	762
ENSDARG00000012603	ENSDART00000020082	25	6	6	ACACCACTCACACCAGAAGATGAA	6	+	310	762
ENSDARG00000012603	ENSDART00000020082	25	9	9	TTATGCACAAGACTATGAGGACTTC	7	+	744	762
ENSDARG00000012603	ENSDART00000103378	25	5	5	ACACCACTCACACCAGAAGATGAA	6	+	310	807
ENSDARG00000012603	ENSDART00000103378	25	5	5	AGCAAAAGAGGCATTTGGTGAGTG	6	+	387	807
ENSDARG00000012603	ENSDART00000103378	25	5	5	AGCAAAAGAGGCATTTGGTGAGTGC	7	+	387	807
ENSDARG00000012603	ENSDART00000103378	25	8	8	TTATGCACAAGACTATGAGGACTTC	7	+	789	807
ENSDARG00000012738	ENSDART00000005778	25	1	1	AGCTCCAGCTGAGTCTTTAGTTTCT	7	-	68	1545
ENSDARG00000012738	ENSDART00000005778	25	2	2	TTCTCCAGCTTTTCTCTGATGAA	5	-	91	1545
ENSDARG00000012738	ENSDART00000005778	25	2	2	TGCCACTTCCAGGGTGTGCGTGTGT	7	-	193	1545
ENSDARG00000012738	ENSDART00000005778	25	2	2	TGCCACTTCCAGGGTGTGCGTGT	5	-	195	1545
ENSDARG00000012738	ENSDART00000005778	25	4	4	AGAAAACCCTGCACTGGCGGAAGCA	7	-	1322	1545
ENSDARG00000012738	ENSDART00000005778	25	4	4	TACCGCTTCCTGTAAGGAGTGGAC	6	-	1217	1545
ENSDARG00000012738	ENSDART00000005778	25	4	4	GTTTACACAGTAGGTGTGGCCGGG	6	-	961	1545
ENSDARG00000012738	ENSDART00000005778	25	4	4	GAACTCGGCCTGGAGAGAGGAGGGG	7	-	517	1545
ENSDARG00000012738	ENSDART00000005778	25	4	4	CTCCACTAACAGATGAGAAGGAGGG	7	-	895	1545
ENSDARG00000012738	ENSDART00000005778	25	4	4	AGATTCAACCCAGGGAAGATGTT	5	-	637	1545
ENSDARG00000012947	ENSDART00000023509	25	2	2	GAAGTCAAATTTAAGCCGCTTTT	5	-	86	690
ENSDARG00000012947	ENSDART00000023509	25	3	3	CACATCTGCCGTGTTCTGCAGTT	5	-	293	690
ENSDARG00000012947	ENSDART00000023509	25	3	3	AACACCTGCACATCTGCCGTGTTC	6	-	300	690
ENSDARG00000012947	ENSDART00000023509	25	4	4	TTCTTCTTCTGTCAGTGGTGGAA	5	-	320	690
ENSDARG00000012947	ENSDART00000023509	25	6	6	CAAACCTGCTCTTATCGGAGAAGTG	7	-	550	690
ENSDARG00000012986	ENSDART00000067288	25	1	1	TCCTACCACTTTGGGTAGCTGGC	5	-	38	1050
ENSDARG00000012986	ENSDART00000067288	25	1	1	TTCCTACCACTTTGGGTAGCTGGC	6	-	38	1050
ENSDARG00000012986	ENSDART00000067288	25	2	2	CACTCACTCGTCCAGTGTGCGGCG	6	-	169	1050
ENSDARG00000012986	ENSDART00000067288	25	4	4	CGCAAACTCTTGAATGACTGATTT	6	-	253	1050
ENSDARG00000012986	ENSDART00000067288	25	4	4	CTACGCAACTCCAAGTATTTTAC	5	-	286	1050
ENSDARG00000012986	ENSDART00000067288	25	4	4	TGCTACGCAACTCCAAGTATTTTAC	7	-	286	1050
ENSDARG00000012986	ENSDART00000067288	25	4	4	GTTTCAGTCACTTCTCGTGGTGTGC	7	-	308	1050
ENSDARG00000012986	ENSDART00000067288	25	6	6	ACCTCAGGCCCATGTCTGCGGTC	5	-	439	1050
ENSDARG00000012986	ENSDART00000067288	25	8	8	CCCGCCGACATCAGGATGCAGGA	5	-	701	1050
ENSDARG00000012986	ENSDART00000067288	25	10	10	GTCTTCTCCAGTCGCTGTTTGATTG	7	-	1004	1050
ENSDARG00000012986	ENSDART00000067288	25	10	10	GTCAAACCAAAGGTGGAGGCGGCC	6	-	921	1050
ENSDARG00000012986	ENSDART00000067288	25	10	10	GTCAAACCAAAGGTGGAGGCGGC	5	-	922	1050
ENSDARG00000012986	ENSDART00000067288	25	10	10	GACTCCACACAGCTTCTTTTGTC	5	-	942	1050
ENSDARG00000012986	ENSDART00000067288	25	10	10	AGACTCCACACAGCTTCTTTTGTC	6	-	942	1050
ENSDARG00000012987	ENSDART00000022437	25	1	1	TTCTTCACCTGAACTTGTTGAATCT	7	-	112	1659
ENSDARG00000012987	ENSDART00000022437	25	4	4	TCCGTCCACTATGATGGGAGTGT	5	-	329	1659
ENSDARG00000012987	ENSDART00000022437	25	4	4	TCCGTCCACTATGATGGGAGTGTTG	7	-	327	1659
ENSDARG00000012987	ENSDART00000022437	25	5	5	GTTCACCACATCAGTGATGCTTTT	6	-	445	1659
ENSDARG00000012987	ENSDART00000022437	25	5	5	TTCACCACATCAGTGATGCTTTT	5	-	445	1659
ENSDARG00000012987	ENSDART00000022437	25	9	9	AACTCCTTCACTTTTGGCTGATAA	6	-	750	1659
ENSDARG00000012987	ENSDART00000022437	25	9	9	AACTCAAACATGTTGTTGGTGTC	5	-	781	1659
ENSDARG00000012987	ENSDART00000022437	25	9	9	AAACTCAAACATGTTGTTGGTGTC	6	-	781	1659
ENSDARG00000012987	ENSDART00000022437	25	10	10	GACCACAGAGAATAGCGGCCGCC	5	-	817	1659
ENSDARG00000012987	ENSDART00000022437	25	12	12	AAATACGCAGCGAAGCGATGCATGT	7	-	1037	1659
ENSDARG00000012987	ENSDART00000022437	25	12	12	AGAGCCAGAATGACCGGAGCGTTC	6	-	948	1659
ENSDARG00000012987	ENSDART00000022437	25	14	14	CTCTGCGCAGGAATGAGGAAGTC	5	-	1219	1659
ENSDARG00000012987	ENSDART00000022437	25	14	14	AGACTCTACCTTATGATGCAGGT	5	-	1262	1659
ENSDARG00000012987	ENSDART00000022437	25	15	15	AAATTCGCCATCAGGATCTGCGGGA	7	-	1268	1659
ENSDARG00000012987	ENSDART00000022437	25	15	15	CCCCTCATCAGAGCCTCTGTTTGC	6	-	1299	1659
ENSDARG00000013004	ENSDART00000017299	25	2	1	GAATACCTCCAACAATGGTGAGTG	6	+	52	1326
ENSDARG00000013004	ENSDART00000017299	25	2	1	GAATACCTCCAACAATGGTGAGTGT	7	+	52	1326
ENSDARG00000013004	ENSDART00000017299	25	3	2	CTCAGCTCCAGCCTGCCGCTGCG	5	+	209	1326
ENSDARG00000013004	ENSDART00000017299	25	3	2	GGCTCAGCAGCATCTGCAGACGCT	6	+	78	1326
ENSDARG00000013004	ENSDART00000017299	25	3	2	AGCTCCAGCCTGCCGCTGCGCAGAC	7	+	212	1326
ENSDARG00000013004	ENSDART00000017299	25	3	2	GAAGACGCAGGCATGCAGCAGAT	5	+	163	1326
ENSDARG00000013004	ENSDART00000017299	25	4	3	AACCCAAGAAAGCCAAGGAGGATAA	7	+	329	1326
ENSDARG00000013004	ENSDART00000017299	25	5	4	GGCGGCTTACATCGGTAGATGGT	5	+	528	1326
ENSDARG00000013004	ENSDART00000017299	25	7	6	GTTCAAGCCACTCATAGCGGTTTTT	7	+	759	1326
ENSDARG00000013004	ENSDART00000017299	25	8	7	AGCCCAAAACACTTGAATTTGGC	5	+	833	1326
ENSDARG00000013004	ENSDART00000017299	25	9	8	CACTTCTACATCAAGCTGCGGGA	5	+	955	1326
ENSDARG00000013004	ENSDART00000017299	25	9	8	TTCTACATCAAGCTGCGGGAGCT	5	+	958	1326
ENSDARG00000013004	ENSDART00000017299	25	10	9	CTCTGCATCTGAGGAGAATGGTTG	6	+	1182	1326
ENSDARG00000013004	ENSDART00000017299	25	10	9	GGCCAAAGCAATGGGATTTGTAA	5	+	1156	1326
ENSDARG00000013004	ENSDART00000017299	25	11	10	GCCCAAAACTGGGGTGTATGAGGA	6	+	1318	1326
ENSDARG00000013004	ENSDART00000017299	25	11	10	AGCCCAAAACTGGGGTGTATGAGGA	7	+	1317	1326
ENSDARG00000013004	ENSDART00000017299	25	11	10	TCCCACAAAGCCAAGTGATGTTGGT	7	+	1221	1326
ENSDARG00000013004	ENSDART00000017299	25	11	10	CTCTCAAGCCCAAAACTGGGGTGTA	7	+	1311	1326
ENSDARG00000013015	ENSDART00000021089	25	2	1	CACATCTCCGCTGAACGCAGCCTTG	7	-	123	918
ENSDARG00000013015	ENSDART00000021089	25	5	4	ATCAAAGCCAGCATCAGTGGAGTGT	7	-	503	918
ENSDARG00000013015	ENSDART00000021089	25	5	4	AGCTCCGTCATGTCTGCGTGGTTT	6	-	531	918
ENSDARG00000013015	ENSDART00000021089	25	5	4	AGCTCCGTCATGTCTGCGTGGTT	5	-	532	918
ENSDARG00000013015	ENSDART00000021089	25	5	4	AAAGCCAGCATCAGTGGAGTGTTG	6	-	501	918
ENSDARG00000013015	ENSDART00000021089	25	6	5	AGCAAACGCACCATGCTGATTTG	5	-	634	918
ENSDARG00000013015	ENSDART00000021089	25	6	5	GTCGGCGTCATACTGAAGGAGCA	5	-	653	918
ENSDARG00000013177	ENSDART00000022022	25	1	1	GGCCCCACAGCAGGTGAAGCAGTG	6	-	436	1860
ENSDARG00000013177	ENSDART00000022022	25	1	1	AGCAAAGTCCTCGCGATTTTGTT	5	-	268	1860
ENSDARG00000013177	ENSDART00000022022	25	1	1	TTATCCGACTGCTCGTATGAGTA	5	-	238	1860
ENSDARG00000013177	ENSDART00000022022	25	1	1	AAAGTCCTCGCGATTTTGTTGCT	5	-	265	1860
ENSDARG00000013177	ENSDART00000022022	25	2	2	GTAGGCCGCTGGGGTGTTGAAGGC	6	-	646	1860
ENSDARG00000013177	ENSDART00000022022	25	3	3	GCCATCGCCCAGAGCCTGCGGTGAG	7	-	716	1860
ENSDARG00000013177	ENSDART00000022022	25	4	4	GTCGTCCCAGAACTGAGAGGAAGAA	7	-	879	1860
ENSDARG00000013177	ENSDART00000022022	25	5	5	TCCTCCAGATATCCGGCCGGATGC	6	-	1022	1860
ENSDARG00000013177	ENSDART00000022022	25	6	6	AAATCCATCAGCGTTTCTGACGGG	6	-	1219	1860
ENSDARG00000013177	ENSDART00000022022	25	7	7	CTCAAACACATCATGGAGTTTCT	5	-	1346	1860
ENSDARG00000013177	ENSDART00000022022	25	7	7	CGCCCACCCGATCCTGGAAGTAGAT	7	-	1426	1860
ENSDARG00000013177	ENSDART00000022022	25	7	7	TTCTCAAACACATCATGGAGTTTCT	7	-	1346	1860
ENSDARG00000013177	ENSDART00000086334	25	1	1	AAAGTCCTCGCGATTTTGTTGCT	5	-	271	1866
ENSDARG00000013177	ENSDART00000086334	25	1	1	GGCCCCACAGCAGGTGAAGCAGTG	6	-	442	1866
ENSDARG00000013177	ENSDART00000086334	25	1	1	AGCAAAGTCCTCGCGATTTTGTT	5	-	274	1866
ENSDARG00000013177	ENSDART00000086334	25	1	1	TTATCCGACTGCTCGTATGAGTA	5	-	244	1866
ENSDARG00000013177	ENSDART00000086334	25	2	2	GTAGGCCGCTGGGGTGTTGAAGGC	6	-	652	1866
ENSDARG00000013177	ENSDART00000086334	25	3	3	GCCATCGCCCAGAGCCTGCGGTGAG	7	-	722	1866
ENSDARG00000013177	ENSDART00000086334	25	4	4	GTCGTCCCAGAACTGAGAGGAAGAA	7	-	885	1866
ENSDARG00000013177	ENSDART00000086334	25	6	6	TCCTCCAGATATCCGGCCGGATGC	6	-	1028	1866
ENSDARG00000013177	ENSDART00000086334	25	7	7	AAATCCATCAGCGTTTCTGACGGG	6	-	1225	1866
ENSDARG00000013177	ENSDART00000086334	25	8	8	CTCAAACACATCATGGAGTTTCT	5	-	1352	1866
ENSDARG00000013177	ENSDART00000086334	25	8	8	CGCCCACCCGATCCTGGAAGTAGAT	7	-	1432	1866
ENSDARG00000013177	ENSDART00000086334	25	8	8	TTCTCAAACACATCATGGAGTTTCT	7	-	1352	1866
ENSDARG00000013177	ENSDART00000103359	25	1	1	AGCAAAGTCCTCGCGATTTTGTT	5	-	115	1689
ENSDARG00000013177	ENSDART00000103359	25	1	1	TTATCCGACTGCTCGTATGAGTA	5	-	85	1689
ENSDARG00000013177	ENSDART00000103359	25	1	1	AAAGTCCTCGCGATTTTGTTGCT	5	-	112	1689
ENSDARG00000013177	ENSDART00000103359	25	1	1	GGCCCCACAGCAGGTGAAGCAGTG	6	-	283	1689
ENSDARG00000013177	ENSDART00000103359	25	3	3	GTAGGCCGCTGGGGTGTTGAAGGC	6	-	475	1689
ENSDARG00000013177	ENSDART00000103359	25	4	4	GCCATCGCCCAGAGCCTGCGGTGAG	7	-	545	1689
ENSDARG00000013177	ENSDART00000103359	25	5	5	GTCGTCCCAGAACTGAGAGGAAGAA	7	-	708	1689
ENSDARG00000013177	ENSDART00000103359	25	7	7	TCCTCCAGATATCCGGCCGGATGC	6	-	851	1689
ENSDARG00000013177	ENSDART00000103359	25	8	8	AAATCCATCAGCGTTTCTGACGGG	6	-	1048	1689
ENSDARG00000013177	ENSDART00000103359	25	9	9	CGCCCACCCGATCCTGGAAGTAGAT	7	-	1255	1689
ENSDARG00000013177	ENSDART00000103359	25	9	9	CTCAAACACATCATGGAGTTTCT	5	-	1175	1689
ENSDARG00000013177	ENSDART00000103359	25	9	9	TTCTCAAACACATCATGGAGTTTCT	7	-	1175	1689
ENSDARG00000013228	ENSDART00000014851	25	1	1	TCCAGCTTCTGCAGGGCAGTGGCC	6	-	90	615
ENSDARG00000013228	ENSDART00000014851	25	1	1	CTCCTCCTCAACCAGCTGGATAC	5	-	44	615
ENSDARG00000013228	ENSDART00000014851	25	1	1	AGCTCCTCCTCAACCAGCTGGATAC	7	-	44	615
ENSDARG00000013228	ENSDART00000014851	25	1	1	GGCCTCCTCCAGCTTCTGCAGGG	5	-	98	615
ENSDARG00000013228	ENSDART00000014851	25	2	2	TGCCTCCTCGTATTTGCGGTCGGC	6	-	244	615
ENSDARG00000013228	ENSDART00000014851	25	2	2	GGCCTCCTCAGCGATGTGCTTGGCC	7	-	222	615
ENSDARG00000013228	ENSDART00000014851	25	2	2	GAAACCTGCCTCCTCGTATTTGCG	6	-	250	615
ENSDARG00000013228	ENSDART00000014851	25	2	2	ACCTGCCTCCTCGTATTTGCGGTC	6	-	247	615
ENSDARG00000013228	ENSDART00000014851	25	4	4	TCCTCAAGCTCTGAGCATTTGCT	5	-	334	615
ENSDARG00000013228	ENSDART00000014851	25	7	7	GTTTTCTTCTTTAGCGTGTGAGAG	6	-	550	615
ENSDARG00000013228	ENSDART00000102793	25	1	1	TGCGCCAACTCCTTCTGCAGTTTCT	7	-	95	744
ENSDARG00000013228	ENSDART00000102793	25	1	1	GACCGCCTCCAGCGATGTAGCCGCC	7	-	15	744
ENSDARG00000013228	ENSDART00000102793	25	1	1	CGCCAACTCCTTCTGCAGTTTCT	5	-	95	744
ENSDARG00000013228	ENSDART00000102793	25	1	1	ACCGCCTCCAGCGATGTAGCCGCC	6	-	15	744
ENSDARG00000013228	ENSDART00000102793	25	2	2	AGCTCCTCCTCAACCAGCTGGATAC	7	-	173	744
ENSDARG00000013228	ENSDART00000102793	25	2	2	CTCCTCCTCAACCAGCTGGATAC	5	-	173	744
ENSDARG00000013228	ENSDART00000102793	25	2	2	GGCCTCCTCCAGCTTCTGCAGGG	5	-	227	744
ENSDARG00000013228	ENSDART00000102793	25	2	2	TCCAGCTTCTGCAGGGCAGTGGCC	6	-	219	744
ENSDARG00000013228	ENSDART00000102793	25	3	3	GAAACCTGCCTCCTCGTATTTGCG	6	-	379	744
ENSDARG00000013228	ENSDART00000102793	25	3	3	ACCTGCCTCCTCGTATTTGCGGTC	6	-	376	744
ENSDARG00000013228	ENSDART00000102793	25	3	3	GGCCTCCTCAGCGATGTGCTTGGCC	7	-	351	744
ENSDARG00000013228	ENSDART00000102793	25	3	3	TGCCTCCTCGTATTTGCGGTCGGC	6	-	373	744
ENSDARG00000013228	ENSDART00000102793	25	5	5	TCCTCAAGCTCTGAGCATTTGCT	5	-	463	744
ENSDARG00000013228	ENSDART00000102793	25	8	8	TCCAGCTCCTCGCTGATGGCTTT	5	-	703	744
ENSDARG00000013312	ENSDART00000023890	25	1	1	TCCTCCAGCGAGGAATCTGAGGGG	6	+	22	1188
ENSDARG00000013312	ENSDART00000023890	25	1	1	AACTACAGATTTATGTGTTTGTG	5	+	227	1188
ENSDARG00000013312	ENSDART00000023890	25	1	1	TTAAACTACAGATTTATGTGTTTGT	7	+	224	1188
ENSDARG00000013312	ENSDART00000023890	25	1	1	AGAGACTTAAAACGGAGGAAGCG	5	+	191	1188
ENSDARG00000013312	ENSDART00000023890	25	2	2	AGCAACAGCTGCAGGTGGTGAAGGA	7	+	323	1188
ENSDARG00000013312	ENSDART00000023890	25	2	2	AGACTCAGATTGTCGCTGATGAG	5	+	374	1188
ENSDARG00000013312	ENSDART00000023890	25	2	2	ACAAGCAACAGCTGCAGGTGGTGAA	7	+	320	1188
ENSDARG00000013312	ENSDART00000023890	25	2	2	AACAGCTGCAGGTGGTGAAGGAGCG	7	+	326	1188
ENSDARG00000013312	ENSDART00000023890	25	3	3	AGCTCATACTTAGCAAGGAGCAGCT	7	+	668	1188
ENSDARG00000013312	ENSDART00000023890	25	3	3	GCCATCTACAAAGGAGAGGAGGAC	6	+	601	1188
ENSDARG00000013312	ENSDART00000023890	25	5	5	TTCCAAAGACATGGAGATGATGTA	6	+	867	1188
ENSDARG00000013312	ENSDART00000023890	25	5	5	TCCAAAGACATGGAGATGATGTA	5	+	868	1188
ENSDARG00000013312	ENSDART00000023890	25	5	5	CCCCTCTCCAAGTCTGACGTAGTG	6	+	1033	1188
ENSDARG00000013312	ENSDART00000023890	25	5	5	ACCTGCTAATGGCTAATCTGGAGAG	7	+	917	1188
ENSDARG00000013312	ENSDART00000023890	25	6	6	TACTGCACCATGGAGGTGGAGGGA	6	+	1129	1188
ENSDARG00000013312	ENSDART00000023890	25	6	6	TACTGCACCATGGAGGTGGAGGG	5	+	1129	1188
ENSDARG00000013379	ENSDART00000021497	25	3	1	GTCTACATCACCCAGGAGCCGAA	5	+	184	1944
ENSDARG00000013379	ENSDART00000021497	25	3	1	CACATCGACACGCTTCTGGAGAA	5	+	43	1944
ENSDARG00000013379	ENSDART00000021497	25	3	1	AGAACCACAAGCTCGTGGACTTC	5	+	128	1944
ENSDARG00000013379	ENSDART00000021497	25	6	4	ACAGCCATCACAAGATGAGGATGTA	7	+	606	1944
ENSDARG00000013379	ENSDART00000021497	25	10	8	CTCGTCTTAATGTGGTGCGACTAG	6	+	1037	1944
ENSDARG00000013379	ENSDART00000021497	25	10	8	TTAATCAGAAAACTGTCTTGAAC	5	+	977	1944
ENSDARG00000013379	ENSDART00000021497	25	11	9	ACATCCTTATCAAACATGTGAGTTC	7	+	1280	1944
ENSDARG00000013379	ENSDART00000021497	25	15	13	ACACTCATCTAGCGACGATGAAGTC	7	+	1581	1944
ENSDARG00000013379	ENSDART00000104585	25	1	1	GTCTACATCACCCAGGAGCCGAA	5	+	184	2472
ENSDARG00000013379	ENSDART00000104585	25	1	1	CACATCGACACGCTTCTGGAGAA	5	+	43	2472
ENSDARG00000013379	ENSDART00000104585	25	1	1	AGAACCACAAGCTCGTGGACTTC	5	+	128	2472
ENSDARG00000013379	ENSDART00000104585	25	4	4	ACAGCCATCACAAGATGAGGATGTA	7	+	606	2472
ENSDARG00000013379	ENSDART00000104585	25	8	8	TTAATCAGAAAACTGTCTTGAAC	5	+	977	2472
ENSDARG00000013379	ENSDART00000104585	25	8	8	CTCGTCTTAATGTGGTGCGACTAG	6	+	1037	2472
ENSDARG00000013379	ENSDART00000104585	25	13	13	ACACTCATCTAGCGACGATGAAGTC	7	+	1575	2472
ENSDARG00000013379	ENSDART00000104585	25	18	18	CTCTCCAAACGCCTCTGGAGATGGA	7	+	2166	2472
ENSDARG00000013379	ENSDART00000104585	25	18	18	TCCAAACGCCTCTGGAGATGGAGAA	7	+	2169	2472
ENSDARG00000013379	ENSDART00000104585	25	19	19	CTATGCAGCAAGAAAGTAAGAATAG	7	+	2315	2472
ENSDARG00000013379	ENSDART00000104585	25	20	20	ACCAACGGCTCTATGAAGGAGAC	5	+	2413	2472
ENSDARG00000013379	ENSDART00000104585	25	20	20	CGCCAAAACTGAAACTGCTGTTTTC	7	+	2454	2472
ENSDARG00000013438	ENSDART00000021340	25	2	1	CACCACACCGTCAGTATGTTTGGTC	7	-	42	720
ENSDARG00000013438	ENSDART00000021340	25	2	1	CACACCGTCAGTATGTTTGGTCT	5	-	41	720
ENSDARG00000013438	ENSDART00000021340	25	5	4	CACATCTGCTCCAATTTCTGAGTGC	7	-	329	720
ENSDARG00000013438	ENSDART00000021340	25	8	7	TCCATCTCCTCTATGTTCTGCAGAA	7	-	566	720
ENSDARG00000013472	ENSDART00000027740	25	2	1	GACGTCACACGGCTGGTGTCGTC	5	+	16	2040
ENSDARG00000013472	ENSDART00000027740	25	4	3	AGAAAAAACAAACCCGTGTGAGTC	6	+	239	2040
ENSDARG00000013472	ENSDART00000027740	25	4	3	AGAAAAAACAAACCCGTGTGAGTCT	7	+	239	2040
ENSDARG00000013472	ENSDART00000027740	25	6	5	TGCCAACACTCAGAAGGAGCTGCA	6	+	582	2040
ENSDARG00000013472	ENSDART00000027740	25	11	10	CTAGGCGGCAGTATAGATGTTTTC	6	+	1255	2040
ENSDARG00000013472	ENSDART00000027740	25	13	12	CTACCCCTCCACAGCAGACTGATGT	7	+	1547	2040
ENSDARG00000013472	ENSDART00000027740	25	13	12	CGCTGCTACAGTCCGTCTGTGGTG	6	+	1489	2040
ENSDARG00000013472	ENSDART00000027740	25	13	12	TACCCCTCCACAGCAGACTGATGT	6	+	1548	2040
ENSDARG00000013472	ENSDART00000027740	25	13	12	GACTCCACCAATCAAAGAAGAGGAG	7	+	1515	2040
ENSDARG00000013472	ENSDART00000027740	25	14	13	TCCTGCTTCTCCTGCTGCTGCTGCT	7	+	1755	2040
ENSDARG00000013472	ENSDART00000027740	25	14	13	TCCTGCTGCTGCTGCTGCTGCTGCT	7	+	1764	2040
ENSDARG00000013472	ENSDART00000027740	25	14	13	AGCTCCTGCTTCTCCTGCTGCTGCT	7	+	1752	2040
ENSDARG00000013472	ENSDART00000027740	25	14	13	TGCTTCTCCTGCTGCTGCTGCTGCT	7	+	1758	2040
ENSDARG00000013472	ENSDART00000027740	25	14	13	TTCTCCTGCTGCTGCTGCTGCTGCT	7	+	1761	2040
ENSDARG00000013472	ENSDART00000027740	25	14	13	TGCTGCTGCTGCTGCTGCTGCTGGT	7	+	1767	2040
ENSDARG00000013472	ENSDART00000027740	25	15	14	CTCAGCTCCAGCCGCAGCAGTGGAT	7	+	1785	2040
ENSDARG00000013472	ENSDART00000027740	25	15	14	AGCTCCAGCCGCAGCAGTGGATTCT	7	+	1788	2040
ENSDARG00000013472	ENSDART00000027740	25	15	14	CTCCTCAGCTCCAGCCGCAGCAGTG	7	+	1782	2040
ENSDARG00000013472	ENSDART00000027740	25	17	16	GAAATCCACGGTCTGATTGAGAA	5	+	1951	2040
ENSDARG00000013582	ENSDART00000045488	25	2	2	GTAATCCTCCTGGTTGCTGCAGGT	6	-	106	1050
ENSDARG00000013582	ENSDART00000045488	25	4	4	GCATTCAAAGACAAGCGCAGGCGTT	7	-	333	1050
ENSDARG00000013719	ENSDART00000022279	25	3	2	AAACAAACCTTCCAGGTGACAAC	5	-	75	2184
ENSDARG00000013719	ENSDART00000022279	25	4	3	TTCTCACTCTGCTTGGAGGAGGAA	6	-	701	2184
ENSDARG00000013719	ENSDART00000022279	25	4	3	TTCTCACTCTGCTTGGAGGAGGA	5	-	702	2184
ENSDARG00000013719	ENSDART00000022279	25	4	3	GGCTGCAGAATCGGTGATGGTTTG	6	-	301	2184
ENSDARG00000013719	ENSDART00000022279	25	4	3	CTCGGCTGCAGAATCGGTGATGGT	6	-	304	2184
ENSDARG00000013719	ENSDART00000022279	25	4	3	CTCGACACCATGAGAGATGCATTT	6	-	151	2184
ENSDARG00000013719	ENSDART00000022279	25	4	3	AACCCAGCCTTCCCGTTAGTCTTC	6	-	498	2184
ENSDARG00000013719	ENSDART00000022279	25	4	3	AAACCCAGCCTTCCCGTTAGTCTTC	7	-	498	2184
ENSDARG00000013719	ENSDART00000022279	25	4	3	CAACGCTGCTCTCGGCTGCAGAA	5	-	315	2184
ENSDARG00000013719	ENSDART00000022279	25	5	4	GACGTCAGAAGCAACGCTGGTGTT	6	-	796	2184
ENSDARG00000013719	ENSDART00000022279	25	7	6	GGCAACAACTGAGGATTTGCGGCT	6	-	1105	2184
ENSDARG00000013719	ENSDART00000022279	25	7	6	GGCGGCAACGACTCTGTCTTTTTC	6	-	1227	2184
ENSDARG00000013719	ENSDART00000022279	25	9	8	CACTTCGTCAGCAGTGGATGAGCA	6	-	1642	2184
ENSDARG00000013719	ENSDART00000022279	25	11	10	GCCCACGGCTTTCCAGAGGAGGTT	6	-	2073	2184
ENSDARG00000013752	ENSDART00000012256	25	4	3	ACAAAAGGCCTTCTGGAGAAGGA	5	+	73	528
ENSDARG00000013752	ENSDART00000012256	25	4	3	TTCCACAGAGTTTGGTGTTGAGCA	6	+	47	528
ENSDARG00000013752	ENSDART00000012256	25	4	3	CTCCTCTACACAGGATCTGCAGGT	6	+	162	528
ENSDARG00000013752	ENSDART00000012256	25	4	3	TACCGCTGCGGCCAAAGAGGCTTAC	7	+	105	528
ENSDARG00000013752	ENSDART00000012256	25	5	4	CAAATCGACAAAGTTGATGAGGAG	6	+	208	528
ENSDARG00000013752	ENSDART00000012256	25	6	5	GGCTCCAAACACAAGGTGTCTCT	5	+	379	528
ENSDARG00000013752	ENSDART00000012256	25	6	5	AGATGCTTCAGGCTCTGCTGGGCT	6	+	359	528
ENSDARG00000013782	ENSDART00000003725	25	2	2	ACCGTCCCATCCTCCAGCTGTAGTT	7	-	125	5451
ENSDARG00000013782	ENSDART00000003725	25	3	3	CTCAACAAATCGGACTTTGAGGTT	6	-	268	5451
ENSDARG00000013782	ENSDART00000003725	25	3	3	ACCTACCGCAATACGTGTAGATGAT	7	-	298	5451
ENSDARG00000013782	ENSDART00000003725	25	3	3	GACTCAACAAATCGGACTTTGAG	5	-	271	5451
ENSDARG00000013782	ENSDART00000003725	25	4	4	TGCATCTCCATAGATGGGAAGCT	5	-	350	5451
ENSDARG00000013782	ENSDART00000003725	25	5	5	GTCCTCCACTCGGGTTTTGCTGCC	6	-	565	5451
ENSDARG00000013782	ENSDART00000003725	25	7	7	ACACTCACACAGTCGTAAGCCTTT	6	-	829	5451
ENSDARG00000013782	ENSDART00000003725	25	7	7	CACTCACACAGTCGTAAGCCTTT	5	-	829	5451
ENSDARG00000013782	ENSDART00000003725	25	7	7	ACAAGCACACATTTGGTAGAAGAT	6	-	787	5451
ENSDARG00000013782	ENSDART00000003725	25	10	10	ACCATCAGCGCGTGGTTGATTTT	5	-	1258	5451
ENSDARG00000013782	ENSDART00000003725	25	10	10	CCCCAATAAACGAATGCTGTTTGC	6	-	1286	5451
ENSDARG00000013782	ENSDART00000003725	25	11	11	TGCAGCTTCTCATTGGCGTAGTTG	6	-	1368	5451
ENSDARG00000013782	ENSDART00000003725	25	11	11	TGCAGCTTCTCATTGGCGTAGTT	5	-	1369	5451
ENSDARG00000013782	ENSDART00000003725	25	16	16	TACCTACTCGAATGGCAGTTTTT	5	-	1967	5451
ENSDARG00000013782	ENSDART00000003725	25	16	16	GTTACCTACTCGAATGGCAGTTTTT	7	-	1967	5451
ENSDARG00000013782	ENSDART00000003725	25	18	18	AGAACCGTCCTGCACGTCTGCTTCT	7	-	2141	5451
ENSDARG00000013782	ENSDART00000003725	25	21	21	ACCAGCCGCCGCATGGTTTGAAAC	6	-	2625	5451
ENSDARG00000013782	ENSDART00000003725	25	26	26	CTCCTCCACTTGCGTTTGCAGTC	5	-	3140	5451
ENSDARG00000013782	ENSDART00000003725	25	26	26	GTCCTCCTCCACTTGCGTTTGCA	5	-	3143	5451
ENSDARG00000013782	ENSDART00000003725	25	26	26	TACGCCACCTTGACGTGTTTGGT	5	-	3208	5451
ENSDARG00000013782	ENSDART00000003725	25	26	26	TACGCCACCTTGACGTGTTTGGTG	6	-	3207	5451
ENSDARG00000013782	ENSDART00000003725	25	26	26	TCCTCCTCCACTTGCGTTTGCAGTC	7	-	3140	5451
ENSDARG00000013782	ENSDART00000003725	25	26	26	CACGTCCTCCTCCACTTGCGTTTGC	7	-	3144	5451
ENSDARG00000013782	ENSDART00000003725	25	29	29	TTCAGCTTCAGCTCGTTGAATCT	5	-	3329	5451
ENSDARG00000013782	ENSDART00000003725	25	35	35	CTCTCCAGCTCGTGTTTGTGGCG	5	-	3802	5451
ENSDARG00000013782	ENSDART00000003725	25	35	35	CTCTCCAGCTCGTGTTTGTGGCGGT	7	-	3800	5451
ENSDARG00000013782	ENSDART00000003725	25	37	37	CTCTTCAACAGCCAGATGGAGCG	5	-	3926	5451
ENSDARG00000013782	ENSDART00000003725	25	38	38	GTCAGCTCCTCCTGCAGGCGTCTGT	7	-	3962	5451
ENSDARG00000013782	ENSDART00000003725	25	39	39	ACCTGCAGCGTGTGTTTGAAGAG	5	-	4199	5451
ENSDARG00000013782	ENSDART00000003725	25	43	43	GCATCCTCCATGACGCTGATGAA	5	-	4711	5451
ENSDARG00000013782	ENSDART00000003725	25	43	43	CGCATCCTCCATGACGCTGATGAA	6	-	4711	5451
ENSDARG00000013782	ENSDART00000003725	25	44	44	GAAGGCCTCAGACGTGCTGGAGTC	6	-	4849	5451
ENSDARG00000013782	ENSDART00000003725	25	44	44	TGCTCCAGCATCCCTGGGACTAA	5	-	4747	5451
ENSDARG00000013782	ENSDART00000003725	25	44	44	TCCTCAAACACACTGCTGGAGCG	5	-	4819	5451
ENSDARG00000013782	ENSDART00000003725	25	44	44	AGCTTCTGCAGGATGGAGCTGAC	5	-	4876	5451
ENSDARG00000013782	ENSDART00000003725	25	44	44	ATCCTCAAACACACTGCTGGAGCG	6	-	4819	5451
ENSDARG00000013782	ENSDART00000003725	25	45	45	GGCTGCGTCTTCATCTGTGGTCTTG	7	-	5166	5451
ENSDARG00000013782	ENSDART00000003725	25	45	45	AAAGTCTCCATAGCGTTGCTGCT	5	-	5104	5451
ENSDARG00000013782	ENSDART00000003725	25	45	45	CTCGGCTGCGTCTTCATCTGTGGTC	7	-	5169	5451
ENSDARG00000013782	ENSDART00000003725	25	45	45	TGCGTCTTCATCTGTGGTCTTGTTG	7	-	5163	5451
ENSDARG00000013782	ENSDART00000003725	25	46	46	TTCAAAATCATCAATGGGCGTGTAG	7	-	5250	5451
ENSDARG00000013782	ENSDART00000003725	25	46	46	TTCAAAATCATCAATGGGCGTGT	5	-	5252	5451
ENSDARG00000013782	ENSDART00000003725	25	46	46	AAAATCATCAATGGGCGTGTAGGAG	7	-	5247	5451
ENSDARG00000013782	ENSDART00000003725	25	47	47	AAAAGCTCCAGAGCCTGTGTTGAG	6	-	5394	5451
ENSDARG00000013782	ENSDART00000003725	25	47	47	AGCTCCAGAGCCTGTGTTGAGGA	5	-	5392	5451
ENSDARG00000013782	ENSDART00000003725	25	47	47	AGCTCCAGAGCCTGTGTTGAGGAG	6	-	5391	5451
ENSDARG00000013782	ENSDART00000003725	25	47	47	GCAGTCAGATGCGGGTGAGGAAGTC	7	-	5443	5451
ENSDARG00000013782	ENSDART00000009820	25	2	2	ACCGTCCCATCCTCCAGCTGTAGTT	7	-	125	5478
ENSDARG00000013782	ENSDART00000009820	25	3	3	GACTCAACAAATCGGACTTTGAG	5	-	271	5478
ENSDARG00000013782	ENSDART00000009820	25	3	3	CTCAACAAATCGGACTTTGAGGTT	6	-	268	5478
ENSDARG00000013782	ENSDART00000009820	25	3	3	ACCTACCGCAATACGTGTAGATGAT	7	-	298	5478
ENSDARG00000013782	ENSDART00000009820	25	4	4	TGCATCTCCATAGATGGGAAGCT	5	-	350	5478
ENSDARG00000013782	ENSDART00000009820	25	5	5	GTCCTCCACTCGGGTTTTGCTGCC	6	-	565	5478
ENSDARG00000013782	ENSDART00000009820	25	7	7	ACACTCACACAGTCGTAAGCCTTT	6	-	829	5478
ENSDARG00000013782	ENSDART00000009820	25	7	7	ACAAGCACACATTTGGTAGAAGAT	6	-	787	5478
ENSDARG00000013782	ENSDART00000009820	25	7	7	CACTCACACAGTCGTAAGCCTTT	5	-	829	5478
ENSDARG00000013782	ENSDART00000009820	25	10	10	CCCCAATAAACGAATGCTGTTTGC	6	-	1286	5478
ENSDARG00000013782	ENSDART00000009820	25	10	10	ACCATCAGCGCGTGGTTGATTTT	5	-	1258	5478
ENSDARG00000013782	ENSDART00000009820	25	11	11	TGCAGCTTCTCATTGGCGTAGTT	5	-	1369	5478
ENSDARG00000013782	ENSDART00000009820	25	11	11	TGCAGCTTCTCATTGGCGTAGTTG	6	-	1368	5478
ENSDARG00000013782	ENSDART00000009820	25	16	16	GTTACCTACTCGAATGGCAGTTTTT	7	-	1967	5478
ENSDARG00000013782	ENSDART00000009820	25	16	16	TACCTACTCGAATGGCAGTTTTT	5	-	1967	5478
ENSDARG00000013782	ENSDART00000009820	25	18	18	AGAACCGTCCTGCACGTCTGCTTCT	7	-	2141	5478
ENSDARG00000013782	ENSDART00000009820	25	21	21	ACCAGCCGCCGCATGGTTTGAAAC	6	-	2625	5478
ENSDARG00000013782	ENSDART00000009820	25	21	21	ACATACGCATTTTCCTCTGTGTTT	6	-	2721	5478
ENSDARG00000013782	ENSDART00000009820	25	24	24	GTCCTCCTCCACTTGCGTTTGCA	5	-	3098	5478
ENSDARG00000013782	ENSDART00000009820	25	24	24	CTCCTCCACTTGCGTTTGCAGTC	5	-	3095	5478
ENSDARG00000013782	ENSDART00000009820	25	24	24	CACGTCCTCCTCCACTTGCGTTTGC	7	-	3099	5478
ENSDARG00000013782	ENSDART00000009820	25	24	24	TACGCCACCTTGACGTGTTTGGT	5	-	3163	5478
ENSDARG00000013782	ENSDART00000009820	25	24	24	TACGCCACCTTGACGTGTTTGGTG	6	-	3162	5478
ENSDARG00000013782	ENSDART00000009820	25	24	24	TCCTCCTCCACTTGCGTTTGCAGTC	7	-	3095	5478
ENSDARG00000013782	ENSDART00000009820	25	27	27	TTCAGCTTCAGCTCGTTGAATCT	5	-	3317	5478
ENSDARG00000013782	ENSDART00000009820	25	30	30	CTCTCCAGCTCGTGTTTGTGGCG	5	-	3739	5478
ENSDARG00000013782	ENSDART00000009820	25	30	30	CTCTCCAGCTCGTGTTTGTGGCGGT	7	-	3737	5478
ENSDARG00000013782	ENSDART00000009820	25	31	31	CTCTTCAACAGCCAGATGGAGCG	5	-	3851	5478
ENSDARG00000013782	ENSDART00000009820	25	32	32	GTCAGCTCCTCCTGCAGGCGTCTGT	7	-	3887	5478
ENSDARG00000013782	ENSDART00000009820	25	35	35	ACCTGCAGCGTGTGTTTGAAGAG	5	-	4205	5478
ENSDARG00000013782	ENSDART00000009820	25	39	39	GCATCCTCCATGACGCTGATGAA	5	-	4738	5478
ENSDARG00000013782	ENSDART00000009820	25	39	39	CGCATCCTCCATGACGCTGATGAA	6	-	4738	5478
ENSDARG00000013782	ENSDART00000009820	25	40	40	TCCTCAAACACACTGCTGGAGCG	5	-	4846	5478
ENSDARG00000013782	ENSDART00000009820	25	40	40	TGCTCCAGCATCCCTGGGACTAA	5	-	4774	5478
ENSDARG00000013782	ENSDART00000009820	25	40	40	AGCTTCTGCAGGATGGAGCTGAC	5	-	4903	5478
ENSDARG00000013782	ENSDART00000009820	25	40	40	ATCCTCAAACACACTGCTGGAGCG	6	-	4846	5478
ENSDARG00000013782	ENSDART00000009820	25	40	40	GAAGGCCTCAGACGTGCTGGAGTC	6	-	4876	5478
ENSDARG00000013782	ENSDART00000009820	25	41	41	CTCGGCTGCGTCTTCATCTGTGGTC	7	-	5196	5478
ENSDARG00000013782	ENSDART00000009820	25	41	41	GGCTGCGTCTTCATCTGTGGTCTTG	7	-	5193	5478
ENSDARG00000013782	ENSDART00000009820	25	41	41	AAAGTCTCCATAGCGTTGCTGCT	5	-	5131	5478
ENSDARG00000013782	ENSDART00000009820	25	41	41	TGCGTCTTCATCTGTGGTCTTGTTG	7	-	5190	5478
ENSDARG00000013782	ENSDART00000009820	25	42	42	TTCAAAATCATCAATGGGCGTGT	5	-	5279	5478
ENSDARG00000013782	ENSDART00000009820	25	42	42	TTCAAAATCATCAATGGGCGTGTAG	7	-	5277	5478
ENSDARG00000013782	ENSDART00000009820	25	42	42	AAAATCATCAATGGGCGTGTAGGAG	7	-	5274	5478
ENSDARG00000013782	ENSDART00000009820	25	43	43	AGCTCCAGAGCCTGTGTTGAGGA	5	-	5419	5478
ENSDARG00000013782	ENSDART00000009820	25	43	43	AGCTCCAGAGCCTGTGTTGAGGAG	6	-	5418	5478
ENSDARG00000013782	ENSDART00000009820	25	43	43	GCAGTCAGATGCGGGTGAGGAAGTC	7	-	5470	5478
ENSDARG00000013782	ENSDART00000009820	25	43	43	AAAAGCTCCAGAGCCTGTGTTGAG	6	-	5421	5478
ENSDARG00000013782	ENSDART00000012640	25	2	2	ACCGTCCCATCCTCCAGCTGTAGTT	7	-	125	5394
ENSDARG00000013782	ENSDART00000012640	25	3	3	ACCTACCGCAATACGTGTAGATGAT	7	-	298	5394
ENSDARG00000013782	ENSDART00000012640	25	3	3	GACTCAACAAATCGGACTTTGAG	5	-	271	5394
ENSDARG00000013782	ENSDART00000012640	25	3	3	CTCAACAAATCGGACTTTGAGGTT	6	-	268	5394
ENSDARG00000013782	ENSDART00000012640	25	4	4	TGCATCTCCATAGATGGGAAGCT	5	-	350	5394
ENSDARG00000013782	ENSDART00000012640	25	5	5	GTCCTCCACTCGGGTTTTGCTGCC	6	-	565	5394
ENSDARG00000013782	ENSDART00000012640	25	7	7	ACACTCACACAGTCGTAAGCCTTT	6	-	829	5394
ENSDARG00000013782	ENSDART00000012640	25	7	7	ACAAGCACACATTTGGTAGAAGAT	6	-	787	5394
ENSDARG00000013782	ENSDART00000012640	25	7	7	CACTCACACAGTCGTAAGCCTTT	5	-	829	5394
ENSDARG00000013782	ENSDART00000012640	25	10	10	ACCATCAGCGCGTGGTTGATTTT	5	-	1258	5394
ENSDARG00000013782	ENSDART00000012640	25	10	10	CCCCAATAAACGAATGCTGTTTGC	6	-	1286	5394
ENSDARG00000013782	ENSDART00000012640	25	11	11	TGCAGCTTCTCATTGGCGTAGTTG	6	-	1368	5394
ENSDARG00000013782	ENSDART00000012640	25	11	11	TGCAGCTTCTCATTGGCGTAGTT	5	-	1369	5394
ENSDARG00000013782	ENSDART00000012640	25	16	16	TACCTACTCGAATGGCAGTTTTT	5	-	1967	5394
ENSDARG00000013782	ENSDART00000012640	25	16	16	GTTACCTACTCGAATGGCAGTTTTT	7	-	1967	5394
ENSDARG00000013782	ENSDART00000012640	25	18	18	AGAACCGTCCTGCACGTCTGCTTCT	7	-	2141	5394
ENSDARG00000013782	ENSDART00000012640	25	21	21	ACCAGCCGCCGCATGGTTTGAAAC	6	-	2625	5394
ENSDARG00000013782	ENSDART00000012640	25	21	21	ACATACGCATTTTCCTCTGTGTTT	6	-	2721	5394
ENSDARG00000013782	ENSDART00000012640	25	24	24	TACGCCACCTTGACGTGTTTGGT	5	-	3163	5394
ENSDARG00000013782	ENSDART00000012640	25	24	24	TACGCCACCTTGACGTGTTTGGTG	6	-	3162	5394
ENSDARG00000013782	ENSDART00000012640	25	24	24	GTCCTCCTCCACTTGCGTTTGCA	5	-	3098	5394
ENSDARG00000013782	ENSDART00000012640	25	24	24	CTCCTCCACTTGCGTTTGCAGTC	5	-	3095	5394
ENSDARG00000013782	ENSDART00000012640	25	24	24	TCCTCCTCCACTTGCGTTTGCAGTC	7	-	3095	5394
ENSDARG00000013782	ENSDART00000012640	25	24	24	CACGTCCTCCTCCACTTGCGTTTGC	7	-	3099	5394
ENSDARG00000013782	ENSDART00000012640	25	31	31	CTCTCCAGCTCGTGTTTGTGGCGGT	7	-	3644	5394
ENSDARG00000013782	ENSDART00000012640	25	31	31	CTCTCCAGCTCGTGTTTGTGGCG	5	-	3646	5394
ENSDARG00000013782	ENSDART00000012640	25	33	33	CTCTTCAACAGCCAGATGGAGCG	5	-	3848	5394
ENSDARG00000013782	ENSDART00000012640	25	34	34	GTCAGCTCCTCCTGCAGGCGTCTGT	7	-	3884	5394
ENSDARG00000013782	ENSDART00000012640	25	35	35	ACCTGCAGCGTGTGTTTGAAGAG	5	-	4121	5394
ENSDARG00000013782	ENSDART00000012640	25	39	39	GCATCCTCCATGACGCTGATGAA	5	-	4654	5394
ENSDARG00000013782	ENSDART00000012640	25	39	39	CGCATCCTCCATGACGCTGATGAA	6	-	4654	5394
ENSDARG00000013782	ENSDART00000012640	25	40	40	TGCTCCAGCATCCCTGGGACTAA	5	-	4690	5394
ENSDARG00000013782	ENSDART00000012640	25	40	40	TCCTCAAACACACTGCTGGAGCG	5	-	4762	5394
ENSDARG00000013782	ENSDART00000012640	25	40	40	ATCCTCAAACACACTGCTGGAGCG	6	-	4762	5394
ENSDARG00000013782	ENSDART00000012640	25	40	40	GAAGGCCTCAGACGTGCTGGAGTC	6	-	4792	5394
ENSDARG00000013782	ENSDART00000012640	25	40	40	AGCTTCTGCAGGATGGAGCTGAC	5	-	4819	5394
ENSDARG00000013782	ENSDART00000012640	25	41	41	GGCTGCGTCTTCATCTGTGGTCTTG	7	-	5109	5394
ENSDARG00000013782	ENSDART00000012640	25	41	41	AAAGTCTCCATAGCGTTGCTGCT	5	-	5047	5394
ENSDARG00000013782	ENSDART00000012640	25	41	41	CTCGGCTGCGTCTTCATCTGTGGTC	7	-	5112	5394
ENSDARG00000013782	ENSDART00000012640	25	41	41	TGCGTCTTCATCTGTGGTCTTGTTG	7	-	5106	5394
ENSDARG00000013782	ENSDART00000012640	25	42	42	TTCAAAATCATCAATGGGCGTGTAG	7	-	5193	5394
ENSDARG00000013782	ENSDART00000012640	25	42	42	TTCAAAATCATCAATGGGCGTGT	5	-	5195	5394
ENSDARG00000013782	ENSDART00000012640	25	42	42	AAAATCATCAATGGGCGTGTAGGAG	7	-	5190	5394
ENSDARG00000013782	ENSDART00000012640	25	43	43	AGCTCCAGAGCCTGTGTTGAGGAG	6	-	5334	5394
ENSDARG00000013782	ENSDART00000012640	25	43	43	AAAAGCTCCAGAGCCTGTGTTGAG	6	-	5337	5394
ENSDARG00000013782	ENSDART00000012640	25	43	43	AGCTCCAGAGCCTGTGTTGAGGA	5	-	5335	5394
ENSDARG00000013782	ENSDART00000012640	25	43	43	GCAGTCAGATGCGGGTGAGGAAGTC	7	-	5386	5394
ENSDARG00000013782	ENSDART00000016853	25	2	2	ACCGTCCCATCCTCCAGCTGTAGTT	7	-	125	5415
ENSDARG00000013782	ENSDART00000016853	25	3	3	GACTCAACAAATCGGACTTTGAG	5	-	271	5415
ENSDARG00000013782	ENSDART00000016853	25	3	3	CTCAACAAATCGGACTTTGAGGTT	6	-	268	5415
ENSDARG00000013782	ENSDART00000016853	25	3	3	ACCTACCGCAATACGTGTAGATGAT	7	-	298	5415
ENSDARG00000013782	ENSDART00000016853	25	4	4	TGCATCTCCATAGATGGGAAGCT	5	-	350	5415
ENSDARG00000013782	ENSDART00000016853	25	5	5	GTCCTCCACTCGGGTTTTGCTGCC	6	-	565	5415
ENSDARG00000013782	ENSDART00000016853	25	7	7	ACACTCACACAGTCGTAAGCCTTT	6	-	829	5415
ENSDARG00000013782	ENSDART00000016853	25	7	7	ACAAGCACACATTTGGTAGAAGAT	6	-	787	5415
ENSDARG00000013782	ENSDART00000016853	25	7	7	CACTCACACAGTCGTAAGCCTTT	5	-	829	5415
ENSDARG00000013782	ENSDART00000016853	25	10	10	CCCCAATAAACGAATGCTGTTTGC	6	-	1286	5415
ENSDARG00000013782	ENSDART00000016853	25	10	10	ACCATCAGCGCGTGGTTGATTTT	5	-	1258	5415
ENSDARG00000013782	ENSDART00000016853	25	11	11	TGCAGCTTCTCATTGGCGTAGTT	5	-	1369	5415
ENSDARG00000013782	ENSDART00000016853	25	11	11	TGCAGCTTCTCATTGGCGTAGTTG	6	-	1368	5415
ENSDARG00000013782	ENSDART00000016853	25	16	16	TACCTACTCGAATGGCAGTTTTT	5	-	1967	5415
ENSDARG00000013782	ENSDART00000016853	25	16	16	GTTACCTACTCGAATGGCAGTTTTT	7	-	1967	5415
ENSDARG00000013782	ENSDART00000016853	25	18	18	AGAACCGTCCTGCACGTCTGCTTCT	7	-	2141	5415
ENSDARG00000013782	ENSDART00000016853	25	21	21	ACCAGCCGCCGCATGGTTTGAAAC	6	-	2625	5415
ENSDARG00000013782	ENSDART00000016853	25	26	26	TACGCCACCTTGACGTGTTTGGTG	6	-	3165	5415
ENSDARG00000013782	ENSDART00000016853	25	26	26	GTCCTCCTCCACTTGCGTTTGCA	5	-	3101	5415
ENSDARG00000013782	ENSDART00000016853	25	26	26	CTCCTCCACTTGCGTTTGCAGTC	5	-	3098	5415
ENSDARG00000013782	ENSDART00000016853	25	26	26	CACGTCCTCCTCCACTTGCGTTTGC	7	-	3102	5415
ENSDARG00000013782	ENSDART00000016853	25	26	26	TACGCCACCTTGACGTGTTTGGT	5	-	3166	5415
ENSDARG00000013782	ENSDART00000016853	25	26	26	TCCTCCTCCACTTGCGTTTGCAGTC	7	-	3098	5415
ENSDARG00000013782	ENSDART00000016853	25	27	27	TTCAGCTTCAGCTCGTTGAATCT	5	-	3218	5415
ENSDARG00000013782	ENSDART00000016853	25	32	32	CTCTCCAGCTCGTGTTTGTGGCG	5	-	3700	5415
ENSDARG00000013782	ENSDART00000016853	25	32	32	CTCTCCAGCTCGTGTTTGTGGCGGT	7	-	3698	5415
ENSDARG00000013782	ENSDART00000016853	25	37	37	CTCTTCAACAGCCAGATGGAGCG	5	-	3890	5415
ENSDARG00000013782	ENSDART00000016853	25	38	38	GTCAGCTCCTCCTGCAGGCGTCTGT	7	-	3926	5415
ENSDARG00000013782	ENSDART00000016853	25	39	39	ACCTGCAGCGTGTGTTTGAAGAG	5	-	4163	5415
ENSDARG00000013782	ENSDART00000016853	25	43	43	GCATCCTCCATGACGCTGATGAA	5	-	4675	5415
ENSDARG00000013782	ENSDART00000016853	25	43	43	CGCATCCTCCATGACGCTGATGAA	6	-	4675	5415
ENSDARG00000013782	ENSDART00000016853	25	44	44	TGCTCCAGCATCCCTGGGACTAA	5	-	4711	5415
ENSDARG00000013782	ENSDART00000016853	25	44	44	AGCTTCTGCAGGATGGAGCTGAC	5	-	4840	5415
ENSDARG00000013782	ENSDART00000016853	25	44	44	TCCTCAAACACACTGCTGGAGCG	5	-	4783	5415
ENSDARG00000013782	ENSDART00000016853	25	44	44	ATCCTCAAACACACTGCTGGAGCG	6	-	4783	5415
ENSDARG00000013782	ENSDART00000016853	25	44	44	GAAGGCCTCAGACGTGCTGGAGTC	6	-	4813	5415
ENSDARG00000013782	ENSDART00000016853	25	45	45	CTCGGCTGCGTCTTCATCTGTGGTC	7	-	5133	5415
ENSDARG00000013782	ENSDART00000016853	25	45	45	AAAGTCTCCATAGCGTTGCTGCT	5	-	5068	5415
ENSDARG00000013782	ENSDART00000016853	25	45	45	GGCTGCGTCTTCATCTGTGGTCTTG	7	-	5130	5415
ENSDARG00000013782	ENSDART00000016853	25	45	45	TGCGTCTTCATCTGTGGTCTTGTTG	7	-	5127	5415
ENSDARG00000013782	ENSDART00000016853	25	46	46	AAAATCATCAATGGGCGTGTAGGAG	7	-	5211	5415
ENSDARG00000013782	ENSDART00000016853	25	46	46	TTCAAAATCATCAATGGGCGTGTAG	7	-	5214	5415
ENSDARG00000013782	ENSDART00000016853	25	46	46	TTCAAAATCATCAATGGGCGTGT	5	-	5216	5415
ENSDARG00000013782	ENSDART00000016853	25	47	47	GCAGTCAGATGCGGGTGAGGAAGTC	7	-	5407	5415
ENSDARG00000013782	ENSDART00000016853	25	47	47	AGCTCCAGAGCCTGTGTTGAGGA	5	-	5356	5415
ENSDARG00000013782	ENSDART00000016853	25	47	47	AGCTCCAGAGCCTGTGTTGAGGAG	6	-	5355	5415
ENSDARG00000013782	ENSDART00000016853	25	47	47	AAAAGCTCCAGAGCCTGTGTTGAG	6	-	5358	5415
ENSDARG00000013782	ENSDART00000028997	25	2	2	ACCGTCCCATCCTCCAGCTGTAGTT	7	-	128	1773
ENSDARG00000013782	ENSDART00000028997	25	3	3	CTCAACAAATCGGACTTTGAGGTT	6	-	271	1773
ENSDARG00000013782	ENSDART00000028997	25	3	3	ACCTACCGCAATACGTGTAGATGAT	7	-	301	1773
ENSDARG00000013782	ENSDART00000028997	25	3	3	GACTCAACAAATCGGACTTTGAG	5	-	274	1773
ENSDARG00000013782	ENSDART00000028997	25	4	4	TGCATCTCCATAGATGGGAAGCT	5	-	353	1773
ENSDARG00000013782	ENSDART00000028997	25	5	5	GTCCTCCACTCGGGTTTTGCTGCC	6	-	568	1773
ENSDARG00000013782	ENSDART00000028997	25	7	7	ACACTCACACAGTCGTAAGCCTTT	6	-	832	1773
ENSDARG00000013782	ENSDART00000028997	25	7	7	CACTCACACAGTCGTAAGCCTTT	5	-	832	1773
ENSDARG00000013782	ENSDART00000028997	25	7	7	ACAAGCACACATTTGGTAGAAGAT	6	-	790	1773
ENSDARG00000013782	ENSDART00000028997	25	10	10	CCCCAATAAACGAATGCTGTTTGC	6	-	1289	1773
ENSDARG00000013782	ENSDART00000028997	25	10	10	ACCATCAGCGCGTGGTTGATTTT	5	-	1261	1773
ENSDARG00000013782	ENSDART00000028997	25	11	11	TGCAGCTTCTCATTGGCGTAGTT	5	-	1372	1773
ENSDARG00000013782	ENSDART00000028997	25	11	11	TGCAGCTTCTCATTGGCGTAGTTG	6	-	1371	1773
ENSDARG00000013782	ENSDART00000039699	25	2	2	ACCGTCCCATCCTCCAGCTGTAGTT	7	-	125	5472
ENSDARG00000013782	ENSDART00000039699	25	3	3	CTCAACAAATCGGACTTTGAGGTT	6	-	268	5472
ENSDARG00000013782	ENSDART00000039699	25	3	3	ACCTACCGCAATACGTGTAGATGAT	7	-	298	5472
ENSDARG00000013782	ENSDART00000039699	25	3	3	GACTCAACAAATCGGACTTTGAG	5	-	271	5472
ENSDARG00000013782	ENSDART00000039699	25	4	4	TGCATCTCCATAGATGGGAAGCT	5	-	350	5472
ENSDARG00000013782	ENSDART00000039699	25	5	5	GTCCTCCACTCGGGTTTTGCTGCC	6	-	565	5472
ENSDARG00000013782	ENSDART00000039699	25	7	7	ACACTCACACAGTCGTAAGCCTTT	6	-	829	5472
ENSDARG00000013782	ENSDART00000039699	25	7	7	CACTCACACAGTCGTAAGCCTTT	5	-	829	5472
ENSDARG00000013782	ENSDART00000039699	25	7	7	ACAAGCACACATTTGGTAGAAGAT	6	-	787	5472
ENSDARG00000013782	ENSDART00000039699	25	10	10	CCCCAATAAACGAATGCTGTTTGC	6	-	1286	5472
ENSDARG00000013782	ENSDART00000039699	25	10	10	ACCATCAGCGCGTGGTTGATTTT	5	-	1258	5472
ENSDARG00000013782	ENSDART00000039699	25	11	11	TGCAGCTTCTCATTGGCGTAGTTG	6	-	1368	5472
ENSDARG00000013782	ENSDART00000039699	25	11	11	TGCAGCTTCTCATTGGCGTAGTT	5	-	1369	5472
ENSDARG00000013782	ENSDART00000039699	25	16	16	TACCTACTCGAATGGCAGTTTTT	5	-	1967	5472
ENSDARG00000013782	ENSDART00000039699	25	16	16	GTTACCTACTCGAATGGCAGTTTTT	7	-	1967	5472
ENSDARG00000013782	ENSDART00000039699	25	18	18	AGAACCGTCCTGCACGTCTGCTTCT	7	-	2141	5472
ENSDARG00000013782	ENSDART00000039699	25	21	21	ACATACGCATTTTCCTCTGTGTTT	6	-	2721	5472
ENSDARG00000013782	ENSDART00000039699	25	21	21	ACCAGCCGCCGCATGGTTTGAAAC	6	-	2625	5472
ENSDARG00000013782	ENSDART00000039699	25	24	24	GTCCTCCTCCACTTGCGTTTGCA	5	-	3086	5472
ENSDARG00000013782	ENSDART00000039699	25	24	24	TACGCCACCTTGACGTGTTTGGT	5	-	3151	5472
ENSDARG00000013782	ENSDART00000039699	25	24	24	TCCTCCTCCACTTGCGTTTGCAGTC	7	-	3083	5472
ENSDARG00000013782	ENSDART00000039699	25	24	24	CTCCTCCACTTGCGTTTGCAGTC	5	-	3083	5472
ENSDARG00000013782	ENSDART00000039699	25	24	24	CACGTCCTCCTCCACTTGCGTTTGC	7	-	3087	5472
ENSDARG00000013782	ENSDART00000039699	25	24	24	TACGCCACCTTGACGTGTTTGGTG	6	-	3150	5472
ENSDARG00000013782	ENSDART00000039699	25	27	27	TTCAGCTTCAGCTCGTTGAATCT	5	-	3380	5472
ENSDARG00000013782	ENSDART00000039699	25	30	30	CTCTCCAGCTCGTGTTTGTGGCGGT	7	-	3734	5472
ENSDARG00000013782	ENSDART00000039699	25	30	30	CTCTCCAGCTCGTGTTTGTGGCG	5	-	3736	5472
ENSDARG00000013782	ENSDART00000039699	25	35	35	CTCTTCAACAGCCAGATGGAGCG	5	-	3926	5472
ENSDARG00000013782	ENSDART00000039699	25	36	36	GTCAGCTCCTCCTGCAGGCGTCTGT	7	-	3962	5472
ENSDARG00000013782	ENSDART00000039699	25	37	37	ACCTGCAGCGTGTGTTTGAAGAG	5	-	4199	5472
ENSDARG00000013782	ENSDART00000039699	25	41	41	GCATCCTCCATGACGCTGATGAA	5	-	4732	5472
ENSDARG00000013782	ENSDART00000039699	25	41	41	CGCATCCTCCATGACGCTGATGAA	6	-	4732	5472
ENSDARG00000013782	ENSDART00000039699	25	42	42	AGCTTCTGCAGGATGGAGCTGAC	5	-	4897	5472
ENSDARG00000013782	ENSDART00000039699	25	42	42	ATCCTCAAACACACTGCTGGAGCG	6	-	4840	5472
ENSDARG00000013782	ENSDART00000039699	25	42	42	GAAGGCCTCAGACGTGCTGGAGTC	6	-	4870	5472
ENSDARG00000013782	ENSDART00000039699	25	42	42	TGCTCCAGCATCCCTGGGACTAA	5	-	4768	5472
ENSDARG00000013782	ENSDART00000039699	25	42	42	TCCTCAAACACACTGCTGGAGCG	5	-	4840	5472
ENSDARG00000013782	ENSDART00000039699	25	43	43	AAAGTCTCCATAGCGTTGCTGCT	5	-	5125	5472
ENSDARG00000013782	ENSDART00000039699	25	43	43	CTCGGCTGCGTCTTCATCTGTGGTC	7	-	5190	5472
ENSDARG00000013782	ENSDART00000039699	25	43	43	TGCGTCTTCATCTGTGGTCTTGTTG	7	-	5184	5472
ENSDARG00000013782	ENSDART00000039699	25	43	43	GGCTGCGTCTTCATCTGTGGTCTTG	7	-	5187	5472
ENSDARG00000013782	ENSDART00000039699	25	44	44	TTCAAAATCATCAATGGGCGTGT	5	-	5273	5472
ENSDARG00000013782	ENSDART00000039699	25	44	44	TTCAAAATCATCAATGGGCGTGTAG	7	-	5271	5472
ENSDARG00000013782	ENSDART00000039699	25	44	44	AAAATCATCAATGGGCGTGTAGGAG	7	-	5268	5472
ENSDARG00000013782	ENSDART00000039699	25	45	45	GCAGTCAGATGCGGGTGAGGAAGTC	7	-	5464	5472
ENSDARG00000013782	ENSDART00000039699	25	45	45	AGCTCCAGAGCCTGTGTTGAGGAG	6	-	5412	5472
ENSDARG00000013782	ENSDART00000039699	25	45	45	AGCTCCAGAGCCTGTGTTGAGGA	5	-	5413	5472
ENSDARG00000013782	ENSDART00000039699	25	45	45	AAAAGCTCCAGAGCCTGTGTTGAG	6	-	5415	5472
ENSDARG00000013782	ENSDART00000039810	25	2	2	ACCGTCCCATCCTCCAGCTGTAGTT	7	-	125	2952
ENSDARG00000013782	ENSDART00000039810	25	3	3	GACTCAACAAATCGGACTTTGAG	5	-	271	2952
ENSDARG00000013782	ENSDART00000039810	25	3	3	ACCTACCGCAATACGTGTAGATGAT	7	-	298	2952
ENSDARG00000013782	ENSDART00000039810	25	3	3	CTCAACAAATCGGACTTTGAGGTT	6	-	268	2952
ENSDARG00000013782	ENSDART00000039810	25	4	4	TGCATCTCCATAGATGGGAAGCT	5	-	350	2952
ENSDARG00000013782	ENSDART00000039810	25	5	5	GTCCTCCACTCGGGTTTTGCTGCC	6	-	565	2952
ENSDARG00000013782	ENSDART00000039810	25	7	7	ACACTCACACAGTCGTAAGCCTTT	6	-	829	2952
ENSDARG00000013782	ENSDART00000039810	25	7	7	ACAAGCACACATTTGGTAGAAGAT	6	-	787	2952
ENSDARG00000013782	ENSDART00000039810	25	7	7	CACTCACACAGTCGTAAGCCTTT	5	-	829	2952
ENSDARG00000013782	ENSDART00000039810	25	10	10	CCCCAATAAACGAATGCTGTTTGC	6	-	1286	2952
ENSDARG00000013782	ENSDART00000039810	25	10	10	ACCATCAGCGCGTGGTTGATTTT	5	-	1258	2952
ENSDARG00000013782	ENSDART00000039810	25	11	11	TGCAGCTTCTCATTGGCGTAGTTG	6	-	1368	2952
ENSDARG00000013782	ENSDART00000039810	25	11	11	TGCAGCTTCTCATTGGCGTAGTT	5	-	1369	2952
ENSDARG00000013782	ENSDART00000039810	25	16	16	TACCTACTCGAATGGCAGTTTTT	5	-	1967	2952
ENSDARG00000013782	ENSDART00000039810	25	16	16	GTTACCTACTCGAATGGCAGTTTTT	7	-	1967	2952
ENSDARG00000013782	ENSDART00000039810	25	18	18	AGAACCGTCCTGCACGTCTGCTTCT	7	-	2141	2952
ENSDARG00000013782	ENSDART00000039810	25	21	21	ACCAGCCGCCGCATGGTTTGAAAC	6	-	2625	2952
ENSDARG00000013782	ENSDART00000039810	25	24	24	TTCAGCTTCAGCTCGTTGAATCT	5	-	2909	2952
ENSDARG00000013782	ENSDART00000045539	25	2	2	ACCGTCCCATCCTCCAGCTGTAGTT	7	-	125	5463
ENSDARG00000013782	ENSDART00000045539	25	3	3	CTCAACAAATCGGACTTTGAGGTT	6	-	268	5463
ENSDARG00000013782	ENSDART00000045539	25	3	3	GACTCAACAAATCGGACTTTGAG	5	-	271	5463
ENSDARG00000013782	ENSDART00000045539	25	3	3	ACCTACCGCAATACGTGTAGATGAT	7	-	298	5463
ENSDARG00000013782	ENSDART00000045539	25	4	4	TGCATCTCCATAGATGGGAAGCT	5	-	350	5463
ENSDARG00000013782	ENSDART00000045539	25	5	5	GTCCTCCACTCGGGTTTTGCTGCC	6	-	565	5463
ENSDARG00000013782	ENSDART00000045539	25	7	7	ACACTCACACAGTCGTAAGCCTTT	6	-	829	5463
ENSDARG00000013782	ENSDART00000045539	25	7	7	CACTCACACAGTCGTAAGCCTTT	5	-	829	5463
ENSDARG00000013782	ENSDART00000045539	25	7	7	ACAAGCACACATTTGGTAGAAGAT	6	-	787	5463
ENSDARG00000013782	ENSDART00000045539	25	10	10	ACCATCAGCGCGTGGTTGATTTT	5	-	1258	5463
ENSDARG00000013782	ENSDART00000045539	25	10	10	CCCCAATAAACGAATGCTGTTTGC	6	-	1286	5463
ENSDARG00000013782	ENSDART00000045539	25	11	11	TGCAGCTTCTCATTGGCGTAGTT	5	-	1369	5463
ENSDARG00000013782	ENSDART00000045539	25	11	11	TGCAGCTTCTCATTGGCGTAGTTG	6	-	1368	5463
ENSDARG00000013782	ENSDART00000045539	25	16	16	TACCTACTCGAATGGCAGTTTTT	5	-	1967	5463
ENSDARG00000013782	ENSDART00000045539	25	16	16	GTTACCTACTCGAATGGCAGTTTTT	7	-	1967	5463
ENSDARG00000013782	ENSDART00000045539	25	18	18	AGAACCGTCCTGCACGTCTGCTTCT	7	-	2141	5463
ENSDARG00000013782	ENSDART00000045539	25	21	21	ACATACGCATTTTCCTCTGTGTTT	6	-	2721	5463
ENSDARG00000013782	ENSDART00000045539	25	21	21	ACCAGCCGCCGCATGGTTTGAAAC	6	-	2625	5463
ENSDARG00000013782	ENSDART00000045539	25	24	24	TACGCCACCTTGACGTGTTTGGT	5	-	3163	5463
ENSDARG00000013782	ENSDART00000045539	25	24	24	GTCCTCCTCCACTTGCGTTTGCA	5	-	3098	5463
ENSDARG00000013782	ENSDART00000045539	25	24	24	CTCCTCCACTTGCGTTTGCAGTC	5	-	3095	5463
ENSDARG00000013782	ENSDART00000045539	25	24	24	TACGCCACCTTGACGTGTTTGGTG	6	-	3162	5463
ENSDARG00000013782	ENSDART00000045539	25	24	24	TCCTCCTCCACTTGCGTTTGCAGTC	7	-	3095	5463
ENSDARG00000013782	ENSDART00000045539	25	24	24	CACGTCCTCCTCCACTTGCGTTTGC	7	-	3099	5463
ENSDARG00000013782	ENSDART00000045539	25	27	27	TTCAGCTTCAGCTCGTTGAATCT	5	-	3392	5463
ENSDARG00000013782	ENSDART00000045539	25	30	30	CTCTCCAGCTCGTGTTTGTGGCGGT	7	-	3746	5463
ENSDARG00000013782	ENSDART00000045539	25	30	30	CTCTCCAGCTCGTGTTTGTGGCG	5	-	3748	5463
ENSDARG00000013782	ENSDART00000045539	25	34	34	CTCTTCAACAGCCAGATGGAGCG	5	-	3917	5463
ENSDARG00000013782	ENSDART00000045539	25	35	35	GTCAGCTCCTCCTGCAGGCGTCTGT	7	-	3953	5463
ENSDARG00000013782	ENSDART00000045539	25	36	36	ACCTGCAGCGTGTGTTTGAAGAG	5	-	4190	5463
ENSDARG00000013782	ENSDART00000045539	25	40	40	CGCATCCTCCATGACGCTGATGAA	6	-	4723	5463
ENSDARG00000013782	ENSDART00000045539	25	40	40	GCATCCTCCATGACGCTGATGAA	5	-	4723	5463
ENSDARG00000013782	ENSDART00000045539	25	41	41	TCCTCAAACACACTGCTGGAGCG	5	-	4831	5463
ENSDARG00000013782	ENSDART00000045539	25	41	41	AGCTTCTGCAGGATGGAGCTGAC	5	-	4888	5463
ENSDARG00000013782	ENSDART00000045539	25	41	41	ATCCTCAAACACACTGCTGGAGCG	6	-	4831	5463
ENSDARG00000013782	ENSDART00000045539	25	41	41	TGCTCCAGCATCCCTGGGACTAA	5	-	4759	5463
ENSDARG00000013782	ENSDART00000045539	25	41	41	GAAGGCCTCAGACGTGCTGGAGTC	6	-	4861	5463
ENSDARG00000013782	ENSDART00000045539	25	42	42	CTCGGCTGCGTCTTCATCTGTGGTC	7	-	5181	5463
ENSDARG00000013782	ENSDART00000045539	25	42	42	AAAGTCTCCATAGCGTTGCTGCT	5	-	5116	5463
ENSDARG00000013782	ENSDART00000045539	25	42	42	TGCGTCTTCATCTGTGGTCTTGTTG	7	-	5175	5463
ENSDARG00000013782	ENSDART00000045539	25	42	42	GGCTGCGTCTTCATCTGTGGTCTTG	7	-	5178	5463
ENSDARG00000013782	ENSDART00000045539	25	43	43	TTCAAAATCATCAATGGGCGTGTAG	7	-	5262	5463
ENSDARG00000013782	ENSDART00000045539	25	43	43	TTCAAAATCATCAATGGGCGTGT	5	-	5264	5463
ENSDARG00000013782	ENSDART00000045539	25	43	43	AAAATCATCAATGGGCGTGTAGGAG	7	-	5259	5463
ENSDARG00000013782	ENSDART00000045539	25	44	44	AAAAGCTCCAGAGCCTGTGTTGAG	6	-	5406	5463
ENSDARG00000013782	ENSDART00000045539	25	44	44	AGCTCCAGAGCCTGTGTTGAGGAG	6	-	5403	5463
ENSDARG00000013782	ENSDART00000045539	25	44	44	AGCTCCAGAGCCTGTGTTGAGGA	5	-	5404	5463
ENSDARG00000013782	ENSDART00000045539	25	44	44	GCAGTCAGATGCGGGTGAGGAAGTC	7	-	5455	5463
ENSDARG00000013782	ENSDART00000048286	25	2	2	ACCGTCCCATCCTCCAGCTGTAGTT	7	-	125	5418
ENSDARG00000013782	ENSDART00000048286	25	3	3	CTCAACAAATCGGACTTTGAGGTT	6	-	268	5418
ENSDARG00000013782	ENSDART00000048286	25	3	3	GACTCAACAAATCGGACTTTGAG	5	-	271	5418
ENSDARG00000013782	ENSDART00000048286	25	3	3	ACCTACCGCAATACGTGTAGATGAT	7	-	298	5418
ENSDARG00000013782	ENSDART00000048286	25	4	4	TGCATCTCCATAGATGGGAAGCT	5	-	350	5418
ENSDARG00000013782	ENSDART00000048286	25	5	5	GTCCTCCACTCGGGTTTTGCTGCC	6	-	565	5418
ENSDARG00000013782	ENSDART00000048286	25	7	7	ACACTCACACAGTCGTAAGCCTTT	6	-	829	5418
ENSDARG00000013782	ENSDART00000048286	25	7	7	CACTCACACAGTCGTAAGCCTTT	5	-	829	5418
ENSDARG00000013782	ENSDART00000048286	25	7	7	ACAAGCACACATTTGGTAGAAGAT	6	-	787	5418
ENSDARG00000013782	ENSDART00000048286	25	10	10	ACCATCAGCGCGTGGTTGATTTT	5	-	1258	5418
ENSDARG00000013782	ENSDART00000048286	25	10	10	CCCCAATAAACGAATGCTGTTTGC	6	-	1286	5418
ENSDARG00000013782	ENSDART00000048286	25	11	11	TGCAGCTTCTCATTGGCGTAGTT	5	-	1369	5418
ENSDARG00000013782	ENSDART00000048286	25	11	11	TGCAGCTTCTCATTGGCGTAGTTG	6	-	1368	5418
ENSDARG00000013782	ENSDART00000048286	25	16	16	TACCTACTCGAATGGCAGTTTTT	5	-	1967	5418
ENSDARG00000013782	ENSDART00000048286	25	16	16	GTTACCTACTCGAATGGCAGTTTTT	7	-	1967	5418
ENSDARG00000013782	ENSDART00000048286	25	18	18	AGAACCGTCCTGCACGTCTGCTTCT	7	-	2141	5418
ENSDARG00000013782	ENSDART00000048286	25	21	21	ACCAGCCGCCGCATGGTTTGAAAC	6	-	2625	5418
ENSDARG00000013782	ENSDART00000048286	25	21	21	ACATACGCATTTTCCTCTGTGTTT	6	-	2721	5418
ENSDARG00000013782	ENSDART00000048286	25	24	24	GTCCTCCTCCACTTGCGTTTGCA	5	-	3086	5418
ENSDARG00000013782	ENSDART00000048286	25	24	24	TACGCCACCTTGACGTGTTTGGT	5	-	3151	5418
ENSDARG00000013782	ENSDART00000048286	25	24	24	TACGCCACCTTGACGTGTTTGGTG	6	-	3150	5418
ENSDARG00000013782	ENSDART00000048286	25	24	24	TCCTCCTCCACTTGCGTTTGCAGTC	7	-	3083	5418
ENSDARG00000013782	ENSDART00000048286	25	24	24	CTCCTCCACTTGCGTTTGCAGTC	5	-	3083	5418
ENSDARG00000013782	ENSDART00000048286	25	24	24	CACGTCCTCCTCCACTTGCGTTTGC	7	-	3087	5418
ENSDARG00000013782	ENSDART00000048286	25	27	27	TTCAGCTTCAGCTCGTTGAATCT	5	-	3380	5418
ENSDARG00000013782	ENSDART00000048286	25	30	30	CTCTCCAGCTCGTGTTTGTGGCGGT	7	-	3734	5418
ENSDARG00000013782	ENSDART00000048286	25	30	30	CTCTCCAGCTCGTGTTTGTGGCG	5	-	3736	5418
ENSDARG00000013782	ENSDART00000048286	25	32	32	CTCTTCAACAGCCAGATGGAGCG	5	-	3872	5418
ENSDARG00000013782	ENSDART00000048286	25	33	33	GTCAGCTCCTCCTGCAGGCGTCTGT	7	-	3908	5418
ENSDARG00000013782	ENSDART00000048286	25	34	34	ACCTGCAGCGTGTGTTTGAAGAG	5	-	4145	5418
ENSDARG00000013782	ENSDART00000048286	25	38	38	CGCATCCTCCATGACGCTGATGAA	6	-	4678	5418
ENSDARG00000013782	ENSDART00000048286	25	38	38	GCATCCTCCATGACGCTGATGAA	5	-	4678	5418
ENSDARG00000013782	ENSDART00000048286	25	39	39	AGCTTCTGCAGGATGGAGCTGAC	5	-	4843	5418
ENSDARG00000013782	ENSDART00000048286	25	39	39	TGCTCCAGCATCCCTGGGACTAA	5	-	4714	5418
ENSDARG00000013782	ENSDART00000048286	25	39	39	ATCCTCAAACACACTGCTGGAGCG	6	-	4786	5418
ENSDARG00000013782	ENSDART00000048286	25	39	39	GAAGGCCTCAGACGTGCTGGAGTC	6	-	4816	5418
ENSDARG00000013782	ENSDART00000048286	25	39	39	TCCTCAAACACACTGCTGGAGCG	5	-	4786	5418
ENSDARG00000013782	ENSDART00000048286	25	40	40	TGCGTCTTCATCTGTGGTCTTGTTG	7	-	5130	5418
ENSDARG00000013782	ENSDART00000048286	25	40	40	AAAGTCTCCATAGCGTTGCTGCT	5	-	5071	5418
[truncated: 7,590 more rows]
