# Supplementary material for: Rapid Mutation of Endogenous Zebrafish Genes Using Zinc Finger Nucleases Made by Oligomerized Pool ENgineering (OPEN)
Source: PLoS One. 2009 Feb 9;4(2):e4348. doi: 10.1371/journal.pone.0004348 (PMC2634973; doi:10.1371/journal.pone.0004348)
Supplement: Table S26 — Sequences of primers used in this study (0.02 MB XLS) [file pone.0004348.s026.xls]

## Sheet: Supp Table 26
Primer name	Sequence (5' to 3')
OK.1677	GACGATGATGACAAATCTAGACCCG
OK.1678	CTAGTCTCTAGTTACTACTGTGCAGAGG
T3 sequencing	ATTAACCCTCACTAAAGGGA
OK.1922	GATTGACAGCTGCCTGTGATGTTCT
OK.1923	AACACTGGGACCAACACACACTACA
OK.1916	CTTGCCGAATTATCCTAGTGAAGC
OK.1917	CATCAGTCTCTAACGCAGCATCAGC
Tfr2-seq	ACCTGTGGTGAAGATCAGCA
OK.1928	ATAGTGTTACCCACTGCACCACCAT
OK.1930	GTGACTTTGGGCCAATGAGAGTGTT
OK.1934	ATCTCTCTTGCACATTTCTGTGACCTCTAGC
OK.1935	CTACATTGCATTGGTTTGTGTCGGTGAG
